# Supplementary material for: A simplified characterization of S-adenosyl-l-methionine-consuming enzymes with 1-Step EZ-MTase: a universal and straightforward coupled-assay for in vitro and in vivo setting
Source: Royal Society of Chemistry journal article supplement (doi:10.1039/c7sc02830j), 2017-01-01
Supplement: c7sc02830j1.xlsx [file c7sc02830j1.xlsx]

## Sheet: INSTRUCTIONS
	My 1-Step EZ-MTase ASSAY
	Establish your experimental conditions (e.g. buffer, pH, MTase and other additives' concentrations) using worksheet "Experiment Conditions".
	Within worksheet "Coupling Enzyme Parameters", input the pH at which your experiments were performed.
	With FLUO mode of detection, the methyl donor is 8-aza-SAM (Ex/Em: 282/360 or 292/360).
	Once your kinetics are complete, insert your experimental data within worksheet "Plate Reader Data".
	Finally, determine initial velocities using worksheet "My 1-Step EZ-MTase RESULTS".
	Using the least square difference fit and 'SOLVER', this worksheet will deliver the kinetic parameters for your favorite MTase.
	Data in this file are pertinent to the kinetic behavior of H4(1-20) peptide with TbPRMT7

## Sheet: Experiment Conditions
My 1-Step EZ-MTase Assay
Experimental set-up and data analysis made easy.
Determine: kinetic parameters for Acceptor (Km and kcat) of your favorite MethylTransferase.
	In a FLUO 96-well flat bottom black plate (CORNING, #3991), add the following reagents in row A.
	NOTE:	The well A1 is dedicated to FLUO (all proteins and Methyl Acceptor are omitted; 8-aza-SAM fluorescence).
		The well A2 will account for Background Signal (natural decomposition of 8-aza-SAM cofactor; Methyl Acceptor is omitted).
		Reagents								#1	#2	#3	#4	#5	#6	#7	#8	#9					Final in well	250	mL
Step 1		WATER								159.55	143.192	135.692	131.892	127.192	120.592	111.592	97.992	75.392
Step 2		BUFFER (stock at 200 mM; your favorite pH)								31.25	31.25	31.25	31.25	31.25	31.25	31.25	31.25	31.25					25	mM
Step 3		GLYCEROL (stock at 50%)								50	50	50	50	50	50	50	50	50					10	%
Step 4		bME (stock at 100 mM)								2.5	2.5	2.5	2.5	2.5	2.5	2.5	2.5	2.5					1	mM
Step 5		NaCl (optional)			Stock is at:		500		mM	0	0	0	0	0	0	0	0	0					0	mM
Step 6		Additive #2 (optional)			Stock is at:		20		mM	0	0	0	0	0	0	0	0	0					0	mM
MIX WELL! Step 7		TM0936 (final 4 mM)			Stock is at:		240.5		mM	0	4.158	4.158	4.158	4.158	4.158	4.158	4.158	4.158					4	mM
Step 8		Your favorite MTase				Stock is at:		16.5	mM	0	12.2	12.2	12.2	12.2	12.2	12.2	12.2	12.2					0.8052	mM
Step 9 Add Methyl Acceptor		Methyl Acceptor (H41-20)								0	0	7.5	11.3	16	22.6	31.6	45.2	67.8					various	mM
MIX WELL & READ DIRECTLY!		This step STARTS the MethylTranferase Reaction!								6.7	6.7	6.7	6.7	6.7	6.7	6.7	6.7	6.7					25.0044	mM
		8-aza-SAM			Stock is at:		933		mM
		Desired Final Acceptor Concentration (in mM)								0	0	16.59	24.9956	35.392	49.9912	69.8992	99.9824	149.974
		Original Acceptor Concentration:						553	mM
		NOTE:	Cells in GREEN are ACTIVE and MUST be filed by user.							Cells in GREY (Methyl Acceptor) are ACTIVE and MUST be filed by user.

## Sheet: Coupling Enzyme Parameters
	DEAMINATION REACTION (FLUO Mode)																Ex (nm):	282			YES
																		292			NO
		DFLUO=		a	[8-aza-SAM]2	+	b	[8-aza-SAM]	+	c			a	[8-aza-SAM]2	+	b	[8-aza-SAM]	+	c						To be used:
	pH			Ex/Em: 282/360 nm									Ex/Em: 292/360 nm																	282				292
	5	NO		-3.3527			450.21			184.75			-1.256			252.63			117.73							a=	-3.8982
	5.8	NO		-3.4104			452.96						-1.2856			254.34										b=	445.65
	6.4	NO		-3.6706			458.62						-1.4423			257.73										c=	184.75
	6.8	NO		-3.568			452.43						-1.4218			255.29
	7.2	NO		-3.9973			459.06						-1.6745			259.71
	7.6	YES		-3.8982			445.65						-1.6759			252.58														-3.8982	445.65	184.75
	8	NO		-3.7968			436.87						-1.5305			246.68
	8.4	NO		-3.0451			405.23						-1.1429			228.2
	8.86	NO		-3.1292			409.29						-1.2103			231.52
	9.5	NO		-3.2368			414.36						-1.3155			235.53
		INSTRUCTIONS:
		The PINK cells MUST NOT be edited; data in these cells correspond to universal parameters established within the article.
		GREEN cells should be filed: user MUST input a 'YES' or 'NO' answer.
		Likewise, user MUST select the experimental pH value she/he used (YES within BLUE cell).

## Sheet: Plate Reader Data
My 1-Step EZ-MTase Assay *** Data Input ***
For each well, your plate reader recorded FLUORESCENCE values. FLUO was measured every T second over an extanded period of time.
Step 1:	Please enter the interval T (in second) within the ORANGE cell.											Enter your Acceptor experimental concentrations withing the PINK cells.
						Step 2:		Copy/Paste, within GREEN cells, the plate reader values for BLANK experiments (Bkg and Blk).
						Step 3:		Copy/Paste, within GREEN cells, the plate reader values for MTase experiments (Meas).
						NOTE:		RED cells are not to be modified.
interval T (s)		Time (min)	[H4(1-20)] (mM)		37.7304	16.59			24.9956			35.392			49.9912			69.8992			99.9824			149.974
			Blk (#1)	Bkg (#2)	8357.87	Meas		0.851079	Meas		-1.1179	Meas		1.3661	Meas		2.47157	Meas		3.18093	Meas		2.9925	Meas		2.01919
4		0	11660.9	19807.8	37.7304	19933.9	38.5815	0	19633.5	36.6125	0	20007.4	39.0965	0	20158.4	40.202	0	20250.2	40.9114	0	20226.2	40.7229	0	20097.8	39.7496	0
		0.0666667	11636.4	19801.9	37.6916	19858.1	38.0654	-0.477278	19527.7	35.9623	-0.611405	20034.1	39.2866	0.228856	20070.4	39.5492	-0.614036	20254.1	40.9422	0.0696462	20201.3	40.53	-0.154155	20173.2	40.3146	0.60377
		0.133333	11645.1	19804.9	37.7118	19756.4	37.3942	-1.16868	19499.1	35.7898	-0.804089	20015.8	39.156	0.078139	20050.5	39.4052	-0.77821	20257.7	40.9711	0.0783202	20181	40.3739	-0.330377	20126.3	39.9615	0.230513
Average FLUO Signal for Blk (#1)		0.2	11610	19658.8	36.7708	19732.6	37.2405	-0.381381	19422	35.3321	-0.320807	19950.1	38.6936	0.556732	20057.8	39.4576	0.215286	20153	40.1611	0.209425	20222.1	40.691	0.927712	20177.1	40.3445	1.55458
		0.266667	11571.5	19534.2	36.0017	19733.1	37.2434	0.390574	19514.4	35.8817	0.99785	19912.6	38.4354	1.06761	20003.7	39.0701	0.596793	20215.9	40.6428	1.46019	20304.1	41.3426	2.34834	20206.3	40.5682	2.5473
		0.333333	11566.6	19627.1	36.5725	19682.2	36.9183	-0.505313	19556.7	36.1383	0.683697	19922.4	38.5025	0.563863	19983.5	38.9276	-0.116454	20202.8	40.5418	0.788351	20182.1	40.3828	0.817764	20094.2	39.7234	1.13174
		0.4	11624.2	19565.2	36.19	19709.6	37.0932	0.0520667	19492.5	35.7501	0.67798	19803.9	37.7048	0.148682	19999.6	39.0407	0.379137	20183.8	40.3957	1.02473	20217.7	40.6567	1.47423	20179.3	40.3612	2.152
11449.9		0.466667	11553.6	19643.3	36.6738	19656.7	36.7577	-0.76717	19519	35.9095	0.353616	19815.8	37.7833	-0.25661	20005.9	39.0854	-0.0599406	20199.2	40.5139	0.65921	20192	40.4583	0.791978	20132.5	40.0078	1.31485
		0.533333	11560.9	19604.8	36.434	19667.3	36.8243	-0.460854	19534.7	36.0045	0.688375	19800.6	37.6833	-0.116839	19999.1	39.0372	0.131549	20179.3	40.3608	0.745851	20197.7	40.502	1.07546	20190	40.4428	1.98954
SD=	43.9283	0.6	11569.7	19617.9	36.5151	19656.8	36.7583	-0.607909	19515.5	35.8882	0.490998	19722.5	37.1752	-0.705988	20079.3	39.6144	0.627735	20253	40.9333	1.23727	20278.9	41.1398	1.63215	20128.7	39.9792	1.44486
standard deviation		0.666667	11549.9	19576.5	36.2592	19699	37.0251	-0.085168	19486.7	35.7157	0.57434	19775.9	37.5215	-0.103857	19986.4	38.9475	0.216738	20121.6	39.9265	0.486348	20223.2	40.6999	1.44818	20144.3	40.0961	1.81771
		0.733333	11517.2	19610	36.466	19596	36.3792	-0.937884	19427.5	35.3641	0.015955	19799.8	37.6779	-0.154233	20062	39.4883	0.550747	20126.8	39.9645	0.317609	20193.4	40.469	1.01049	20150.2	40.1402	1.65501
		0.8	11528.8	19635.6	36.6255	19626.2	36.5669	-0.909708	19421.3	35.3277	-0.179967	19742.8	37.3063	-0.685331	19963	38.7835	-0.313637	20184.2	40.3989	0.592422	20158.9	40.206	0.58795	20274	41.1001	2.45537
		0.866667	11533.5	19612.7	36.483	19616.3	36.5053	-0.828755	19459.8	35.5553	0.190265	19818.4	37.8008	-0.048281	20026.1	39.2293	0.274813	20160.4	40.2176	0.553709	20173.2	40.3146	0.839146	20117.9	39.8989	1.39673
		0.933333	11570.3	19593.9	36.3663	19615	36.4969	-0.720497	19459.5	35.5537	0.305303	19802.6	37.6967	-0.0357042	20061	39.4808	0.642954	20100	39.7659	0.218654	20152.3	40.1561	0.79731	20109.6	39.8374	1.45192
		1	11546.9	19573.2	36.2392	19596.4	36.382	-0.708244	19449.5	35.4943	0.373034	19818.9	37.8044	0.199083	20004.3	39.0746	0.363842	20131.4	39.9991	0.57895	20125	39.9517	0.720022	20228.5	40.7411	2.48275
		1.06667	11540.6	19622.1	36.5411	19595.3	36.375	-1.01709	19533.7	35.9982	0.575065	19905.8	38.3884	0.48126	19949.8	38.6921	-0.320521	20185.9	40.4119	0.689878	20170.6	40.2951	0.761523	20158.9	40.206	1.64575
		1.13333	11546.6	19652.2	36.7296	19598	36.3917	-1.18892	19412.6	35.2765	-0.335123	19841.6	37.9553	-0.140399	19962	38.7769	-0.424263	20227.4	40.7323	0.82177	20140	40.0638	0.341719	20108	39.8255	1.07676
		1.2	11556.7	19642.7	36.67	19563.5	36.1798	-1.34126	19459.7	35.5547	0.00262736	19897	38.3286	0.292572	#LOW	#VALUE!	#VALUE!	20111.4	39.8506	-0.00028402	20137.8	40.0475	0.385064	20183.1	40.3899	1.70075
		1.26667	11510.6	19573.5	36.2412	19579.3	36.2768	-0.815414	19547.1	36.0801	0.9568	19730.4	37.2264	-0.380832	20033.2	39.2806	0.567898	20129.7	39.9865	0.564428	20143.1	40.0866	0.852976	20174.1	40.3216	2.06121
		1.33333	11586.8	19624	36.5531	19561.5	36.1676	-1.23653	19449.3	35.4931	0.057961	19670.9	36.8472	-1.07197	19944.7	38.6563	-0.368358	20118.2	39.901	0.167031	20102.9	39.7876	0.242043	20122.1	39.9299	1.35764
		1.4	11478.6	19573	36.2382	19586.9	36.3233	-0.765963	19495.8	35.7703	0.649975	19666.9	36.8215	-0.782803	19958.2	38.7505	0.040712	20075	39.5825	0.163361	20181.2	40.3752	1.14448	20077.5	39.6011	1.34373
		1.46667	11543.5	19584.1	36.3065	19584.5	36.3085	-0.849025	19538.1	36.0253	0.836689	19603.7	36.4271	-1.24551	19953.5	38.7174	-0.0606015	20171.7	40.3034	0.816013	20046.1	39.3734	0.0744263	20084.1	39.6495	1.32388
		1.53333	11524.4	19542.5	36.0519	19575.5	36.2534	-0.649503	19427.2	35.3624	0.428426	19691.1	36.9751	-0.442836	19958.8	38.7546	0.231212	20190.3	40.4453	1.21251	20125.5	39.9549	0.910554	20198	40.5048	2.4337
		1.6	11495.3	19612.2	36.4798	19559.2	36.1535	-1.17736	19412.7	35.2774	-0.0844862	19691	36.9746	-0.871276	20015.9	39.1566	0.20531	20103.4	39.7912	0.130469	20150.6	40.1437	0.671389	20087.1	39.6715	1.17254
		1.66667	11528.9	19595.4	36.3757	19611.5	36.4755	-0.751272	19445.4	35.47	0.212155	19635.1	36.622	-1.11978	19916	38.4588	-0.388452	20098.4	39.7543	0.197639	20097.7	39.7494	0.381226	20064.4	39.5054	1.1105
		1.73333	11499	19596.2	36.3805	19603.5	36.4257	-0.805824	19486.4	35.7136	0.451012	19652.8	36.733	-1.01354	19979.1	38.8967	0.0446438	20089.3	39.6876	0.126212	20100.3	39.7685	0.395506	20093.6	39.7189	1.31928
		1.8	11479.7	19570.7	36.2236	19641.9	36.6648	-0.409873	19423.5	35.3406	0.234914	19661.9	36.7901	-0.79958	19916	38.4588	-0.236425	20048.6	39.3911	-0.0134289	20064.9	39.5092	0.29306	20089.9	39.6918	1.44904
		1.86667	11490.2	19583.7	36.3035	19619.8	36.5266	-0.627997	19479.4	35.6721	0.486473	19720.2	37.1609	-0.508721	19888.4	38.2705	-0.504623	20079.5	39.6158	0.131305	20073.4	39.5708	0.274787	20093.2	39.7161	1.39341
		1.93333	11460.2	19606.5	36.4444	19615	36.4972	-0.798286	19387.2	35.1286	-0.197835	19680.8	36.9096	-0.900886	19858.8	38.0705	-0.845413	20087.6	39.6752	0.0498975	20087.7	39.6756	0.238758	20088	39.6778	1.21428
		2	11476.1	19541.1	36.0435	19584.9	36.3108	-0.583711	19506.7	35.8352	0.909644	19677.3	36.8878	-0.521775	19884.5	38.2438	-0.271252	20045.6	39.3697	0.145325	20068.3	39.5343	0.498355	20099.1	39.7592	1.69661
		2.06667	11537.6	19603.4	36.4252	19598.8	36.3967	-0.879594	19400.1	35.2037	-0.103672	19688.4	36.9581	-0.833215	19909.9	38.4168	-0.480051	20084.8	39.6542	0.0480293	20077	39.5977	0.179987	20161.6	40.2268	1.78239
		2.13333	11502.4	19633.1	36.6096	19560.4	36.1608	-1.29988	19417.7	35.3069	-0.184817	19668	36.8286	-1.14716	19846.2	37.9856	-1.09561	20070.5	39.5497	-0.240851	20044.1	39.3589	-0.243261	20054.8	39.4359	0.807107
		2.2	11509.7	19599.4	36.4004	19543.6	36.0583	-1.19314	19394.2	35.1694	-0.113076	19645.5	36.6875	-1.07895	19882.6	38.2306	-0.641374	20132.7	40.0092	0.427924	20013.4	39.1392	-0.253721	20126.7	39.9642	1.54466
		2.26667	11487.7	19552.2	36.1108	19599.1	36.3988	-0.563036	19396.2	35.181	0.188056	19638.6	36.6443	-0.832555	19831	37.8845	-0.697882	20147.4	40.1196	0.827821	20094.8	39.7282	0.624918	19997.1	39.0232	0.8932
		2.33333	11503.1	19540.4	36.0391	19533.2	35.9952	-0.89498	19476.1	35.6521	0.730987	19609.9	36.4655	-0.939671	19842.7	37.9622	-0.548446	20100	39.7663	0.546348	20177.5	40.3474	1.31588	20074	39.5755	1.51724
		2.4	11503.5	19554.3	36.1235	19561.3	36.1664	-0.808198	19404.5	35.2291	0.223508	19664.1	36.8043	-0.685308	19869.9	38.1452	-0.449923	20073.2	39.5694	0.264972	20056.4	39.4476	0.331533	19994.6	39.0054	0.862724
		2.46667	11477.5	19617.5	36.5124	19528.9	35.9691	-1.39439	19446.2	35.4748	0.0802823	19606.7	36.4457	-1.43287	19852.9	38.0309	-0.953117	20027.3	39.2382	-0.455147	20070.5	39.5498	0.0449143	20063	39.4954	0.963779
		2.53333	11444.7	19610.2	36.4673	19554.3	36.1237	-1.19463	19436.6	35.4178	0.0684183	19590.9	36.3479	-1.48547	19955.3	38.7298	-0.209065	20071.6	39.5577	-0.0904871	20074	39.5757	0.115969	19998.2	39.0313	0.544883
		2.6	11488.5	19574.8	36.2492	19597.3	36.3873	-0.71301	19473.9	35.6388	0.507497	19608.7	36.4578	-1.15755	19837.7	37.9291	-0.791688	20085.6	39.6601	0.229904	20105.4	39.8062	0.564459	20013.4	39.1389	0.870517
		2.66667	11491.3	19568.3	36.209	19498.9	35.7887	-1.27144	19474	35.6399	0.548755	19623	36.5467	-1.02846	19787.8	37.599	-1.08158	20043.1	39.3518	-0.0381994	20032.5	39.2756	0.0740704	20073.4	39.5712	1.34301
		2.73333	11458.5	19612.4	36.4808	19562.9	36.1764	-1.15545	19391.7	35.1547	-0.208161	19619.6	36.5255	-1.32137	19823.3	37.8335	-1.11879	20066.2	39.5186	-0.14312	19968.4	38.8218	-0.65148	20060.1	39.4745	0.974585
		2.8	11485	19585.5	36.3147	19492.7	35.7516	-1.41416	19406.6	35.2417	0.0449266	19586.2	36.3189	-1.36185	19845.7	37.9826	-0.803596	20022.5	39.2041	-0.291455	20035.1	39.2941	-0.0130939	19999.4	39.0393	0.705502
		2.86667	11497.1	19598.6	36.3955	19520	35.9154	-1.33114	19377.3	35.0708	-0.206812	19558.2	36.1473	-1.61428	19834.1	37.9047	-0.962325	20048.5	39.3901	-0.186284	20074.9	39.5819	0.19392	19938.8	38.6157	0.201011
		2.93333	11463.2	19573.6	36.2416	19549.9	36.0969	-0.995794	19365.1	35.0002	-0.123512	19593.2	36.3624	-1.2453	19842.1	37.9586	-0.754647	20070.4	39.5493	0.126726	19980.6	38.9072	-0.326914	20068.3	39.5339	1.27312
		3	11449.4	19626	36.5657	19548.2	36.0868	-1.32997	19392.1	35.1568	-0.290966	19632	36.6028	-1.32893	19922.8	38.5054	-0.531832	20034.7	39.2909	-0.455675	20109.2	39.8342	0.276015	20052.4	39.4183	0.833452
		3.06667	11421.2	19624.1	36.5537	19565.1	36.1899	-1.21489	19418.5	35.3112	-0.124604	19658.1	36.7662	-1.1536	19826.2	37.8528	-1.17246	20048.2	39.3881	-0.34647	20034.2	39.2879	-0.258283	19977.6	38.886	0.313181
		3.13333	11488.9	19539.4	36.0328	19474.6	35.6431	-1.24075	19368.4	35.0192	0.104328	19559.4	36.1546	-1.24429	19845.7	37.9825	-0.521795	20079.4	39.6148	0.401054	19974.7	38.8656	-0.159664	19976.1	38.8753	0.82333
		3.2	11473.7	19513.3	35.8755	19468.3	35.606	-1.12055	19385.7	35.1199	0.362308	19625.7	36.5635	-0.678102	19832.9	37.8973	-0.449741	19999.8	39.0422	-0.014234	20062.2	39.49	0.622035	19968.3	38.8204	0.925778
		3.26667	11459	19581	36.2874	19571.7	36.2298	-0.908644	19356.4	34.9499	-0.219552	19503.6	35.8167	-1.83683	19792.9	37.6324	-1.12655	20012.4	39.1321	-0.336259	19987.1	38.9525	-0.327386	19982.8	38.9223	0.61575
		3.33333	11452.8	19574.4	36.2467	19472.9	35.633	-1.46485	19351	34.9188	-0.210033	19555.6	36.1317	-1.4811	19860.1	38.0791	-0.639245	20050.2	39.4031	-0.0245633	19952.5	38.7105	-0.528765	19984.7	38.9356	0.669641
		3.4	11452.6	19533	35.9944	19475.3	35.6477	-1.19777	19391.3	35.1524	0.275994	19613.4	36.4872	-0.873204	19809.9	37.7448	-0.721164	20036.8	39.3064	0.131086	20007.7	39.0987	0.11181	20000.1	39.0445	1.03093
		3.46667	11490.8	19593.3	36.3627	19498.9	35.7887	-1.42507	19392.9	35.1619	-0.0828957	19559.2	36.1534	-1.57536	19782.9	37.567	-1.26718	19958	38.749	-0.794622	20051.2	39.4098	0.0546275	19973.6	38.8578	0.475924
		3.53333	11426.2	19613	36.4849	19460.6	35.5598	-1.77614	19398.1	35.1918	-0.175238	19513.6	35.8771	-1.97389	19782.6	37.5651	-1.39135	20007	39.0934	-0.572407	19996.6	39.02	-0.457349	19970.9	38.8389	0.334836
		3.6	11457	19468	35.6042	19462.1	35.5691	-0.886192	19344.1	34.8788	0.392496	19550.3	36.0996	-0.870745	19831.3	37.8866	-0.189193	19970.3	38.8349	0.0497261	20014.8	39.149	0.552238	19933.5	38.5789	0.955486
		3.66667	11471.1	19543.3	36.0569	19479.4	35.6718	-1.23619	19420.6	35.3239	0.384881	19511.7	35.8654	-1.55765	19783.8	37.573	-0.955535	20002.2	39.0591	-0.178789	19939.2	38.6186	-0.430839	20009.7	39.1122	1.03613
		3.73333	11410.1	19523.4	35.9363	19541.6	36.0464	-0.741001	19307.6	34.67	-0.148406	19522.6	35.9316	-1.37082	19773	37.5024	-0.905476	19914.4	38.4479	-0.669351	19932.6	38.5726	-0.356198	19918.2	38.4738	0.518321
		3.8	11432.4	19575.1	36.2506	19484.8	35.7041	-1.39758	19355.4	34.944	-0.188729	19542.8	36.0536	-1.56311	19737.7	37.2733	-1.44885	19986.3	38.9472	-0.48433	19956	38.7349	-0.508246	19937.2	38.6042	0.33441
		3.86667	11439.7	19604	36.4291	19489.3	35.7309	-1.54934	19343	34.8725	-0.438726	19525.3	35.9474	-1.84779	19795.8	37.6514	-1.24925	19950	38.693	-0.917032	19908.4	38.4064	-1.01517	19934.9	38.5886	0.14026
		3.93333	11456.2	19550.2	36.0984	19460.8	35.5612	-1.38835	19336.4	34.8347	-0.14583	19542.8	36.0535	-1.41099	19737	37.2689	-1.30108	19923.8	38.512	-0.767392	20000.1	39.0444	-0.0464902	19957.5	38.7453	0.627711
		4	11455.6	19466.5	35.595	19490.6	35.7387	-0.707396	19389.6	35.1422	0.665172	19556.3	36.1359	-0.825221	19819.6	37.8086	-0.257937	19908.7	38.4088	-0.367151	19959.5	38.7595	0.171985	19882.8	38.232	0.617793
		4.06667	11424.1	19574.3	36.246	19444.1	35.4623	-1.63478	19285.2	34.5424	-0.585641	19563.9	36.1825	-1.42952	19742.5	37.3043	-1.4132	19915.1	38.4525	-0.974398	19957	38.7416	-0.496862	19887.8	38.266	0.000848654
		4.13333	11457.5	19488.2	35.7242	19486.7	35.7153	-0.85998	19362.2	34.9835	0.377255	19567.4	36.2037	-0.886595	19828.1	37.865	-0.33073	19928.9	38.547	-0.358118	19957.7	38.7467	0.0300351	19996.6	39.0198	1.27641
		4.2	11426.5	19584	36.3055	19496.8	35.7757	-1.38086	19307.5	34.6691	-0.518453	19515.3	35.887	-1.78463	19808.5	37.735	-1.0421	19913.3	38.4397	-1.04669	19939.6	38.6213	-0.676663	19936	38.5963	0.271626
		4.26667	11454.1	19520	35.9155	19488.2	35.7245	-1.04213	19370.9	35.0337	0.236091	19565	36.1889	-1.09273	19832.3	37.8934	-0.493732	19973	38.8537	-0.242767	19910.1	38.418	-0.489991	19909.5	38.4138	0.479096
		4.33333	11461.6	19531.1	35.9828	19517.9	35.9028	-0.930982	19342.5	34.8695	0.00462095	19518.1	35.9043	-1.44459	19787.6	37.598	-0.85633	19926.6	38.5316	-0.632122	20003.1	39.066	0.0907111	19936.8	38.6021	0.600115
		4.4	11465.9	19436.2	35.4156	19528.8	35.9686	-0.298069	19384.9	35.1153	0.81768	19462.7	35.5722	-1.20949	19808.1	37.7328	-0.154341	19912.5	38.4343	-0.162165	19921.1	38.4937	0.085652	19955.6	38.7322	1.29742
		4.46667	11458.3	19508.4	35.846	19538.8	36.0294	-0.667584	19285.1	34.542	-0.186096	19540.7	36.0412	-1.17084	19697.7	37.0172	-1.30036	19938.2	38.6117	-0.415141	19905.6	38.3874	-0.45109	19902.5	38.3663	0.501195
		4.53333	11445.2	19508.7	35.8477	19446.9	35.4788	-1.22002	19331.9	34.8087	0.0788485	19497.2	35.7783	-1.43556	19754.9	37.3843	-0.934958	19923.1	38.5072	-0.521464	19887.8	38.266	-0.574269	19966.7	38.8097	0.942755
		4.6	11438.9	19536.2	36.0136	19491.8	35.7459	-1.11876	19326.4	34.7772	-0.118481	19566	36.195	-1.18471	19819.8	37.8098	-0.675339	19935.6	38.5931	-0.601398	19869.2	38.1402	-0.86592	19841.9	37.9573	-0.075462
		4.66667	11452.8	19485.1	35.7057	19434.7	35.4064	-1.15029	19312	34.695	0.107257	19547	36.0792	-0.992574	19851.9	38.0237	-0.153537	19994.7	39.0064	0.119816	19942.7	38.6427	-0.0554913	19960.7	38.7676	1.04273
		4.73333	11431	19495.6	35.7689	19461.9	35.5679	-1.05209	19345.6	34.8873	0.236304	19526.3	35.9538	-1.18119	19779.8	37.5466	-0.693918	19942.1	38.6384	-0.311472	19903.5	38.3728	-0.38856	19880.5	38.2164	0.4283
		4.8	11451.4	19534.9	36.0059	19521.9	35.9271	-0.929897	19283.7	34.5342	-0.353785	19500.8	35.7999	-1.57203	19763.8	37.4425	-1.03497	19939	38.6169	-0.569909	19911.5	38.4276	-0.570786	19919.5	38.4828	0.457714
		4.86667	11440	19495.7	35.7694	19484.7	35.7036	-0.916886	19342.9	34.8723	0.220728	19430	35.3792	-1.75633	19822.4	37.8275	-0.413474	19887.3	38.2631	-0.687299	19939.2	38.6181	-0.143815	19820.6	37.8156	0.027014
		4.93333	11445.1	19537.9	36.0237	19495.7	35.7692	-1.10554	19289.7	34.5681	-0.337622	19466	35.5922	-1.7976	19695.2	37.0008	-1.49448	19897.6	38.3327	-0.871882	19940.8	38.6296	-0.386555	19821.8	37.8232	-0.219611
		5	11453.5	19546.8	36.0782	19473.1	35.6345	-1.29486	19295.5	34.6008	-0.359558	19490.2	35.7362	-1.70818	19690.8	36.9729	-1.57695	19915.8	38.4575	-0.801677	19877.7	38.1977	-0.873	19848.9	38.0041	-0.0932845
		5.06667	11401.4	19527.9	35.9631	19490.3	35.7369	-1.07727	19334.5	34.8237	-0.021465	19445	35.4674	-1.86177	19744.7	37.3184	-1.11625	19907.1	38.3978	-0.746198	19920.3	38.4879	-0.467681	19918.7	38.477	0.494731
		5.13333	11424.6	19460.5	35.5597	19509.2	35.8505	-0.560211	19350.9	34.9181	0.476305	19509.5	35.8524	-1.07339	19761.9	37.43	-0.601235	19893.6	38.3054	-0.435202	19925.9	38.5267	-0.025463	19838.9	37.937	0.358196
		5.2	11438.4	19561.4	36.1667	19472.6	35.6314	-1.38644	19327.2	34.7816	-0.2672	19467.9	35.6031	-1.92969	19676.5	36.8827	-1.75564	19876.3	38.1885	-1.15921	19945.8	38.6644	-0.49485	19834.7	37.909	-0.276958
		5.26667	11415	19491.5	35.744	19480.6	35.6792	-0.915948	19192	34.0202	-0.605978	19526.6	35.9558	-1.15437	19695.8	37.0048	-1.21082	19938.9	38.616	-0.308994	19865.3	38.114	-0.62252	19812.8	37.7637	0.000497452
		5.33333	11463.3	19560.2	36.1596	19519.2	35.9108	-1.09994	19318.4	34.7316	-0.310145	19463.9	35.5797	-1.94603	19684	36.93	-1.70126	19891.8	38.293	-1.04754	19922.5	38.5029	-0.649243	19914.2	38.4461	0.267301
		5.4	11446.1	19558.9	36.1515	19445.2	35.4685	-1.53412	19268.7	34.4491	-0.58451	19495.3	35.7668	-1.75081	19777.9	37.5343	-1.08883	19860.5	38.0816	-1.25092	19835.8	37.9161	-1.22798	19856.7	38.0559	-0.114857
		5.46667	11460.7	19448.4	35.4874	19464.3	35.5821	-0.75638	19290.7	34.5735	0.20405	19450.9	35.5023	-1.35119	19703.4	37.0535	-0.905394	19841.6	37.955	-0.713307	19989.7	38.9708	0.490962	19829.8	37.8767	0.370126
		5.53333	11430.1	19485.6	35.7086	19544.7	36.0655	-0.494206	19264.5	34.4256	-0.165165	19480.1	35.6758	-1.39891	19657.1	36.7599	-1.42028	19875.8	38.1846	-0.704962	19877.5	38.1961	-0.505081	19850.9	38.0175	0.289661
		5.6	11416.6	19545.8	36.0719	19450.1	35.498	-1.42502	19293.9	34.592	-0.362043	19513.8	35.8782	-1.55981	19675.8	36.8783	-1.6652	19865.6	38.1162	-1.13662	19900.2	38.3503	-0.714088	19795.9	37.6524	-0.438708
		5.66667	11444.7	19516.1	35.8923	19458.6	35.5479	-1.19551	19221.2	34.1824	-0.591977	19494.1	35.76	-1.4984	19713.9	37.1204	-1.24349	19825	37.8445	-1.22871	19809.1	37.7395	-1.14526	19831.9	37.8906	-0.0209208
		5.73333	11452.5	19519.3	35.9116	19450.3	35.4991	-1.26357	19251	34.3495	-0.44424	19453.8	35.5196	-1.75813	19710.3	37.0972	-1.28601	19909.6	38.415	-0.67751	19854.6	38.0422	-0.861889	19836.1	37.9184	-0.012406
		5.8	11449.7	19513.3	35.8752	19447.4	35.4815	-1.24476	19303.3	34.6454	-0.111844	19464.4	35.5823	-1.65901	19665.7	36.8144	-1.53232	19837.2	37.9257	-1.13047	19863.3	38.1006	-0.767053	19835.3	37.9131	0.0187632
		5.86667	11438.2	19570.8	36.2243	19448.7	35.4893	-1.58607	19274.7	34.4831	-0.623277	19495.5	35.7683	-1.82203	19728.7	37.2151	-1.48078	19846.5	37.9881	-1.41706	19899.7	38.3469	-0.869823	19809.7	37.7431	-0.500342
		5.93333	11438	19569.9	36.2188	19498.5	35.786	-1.28392	19198.2	34.0542	-1.04671	19514.5	35.8824	-1.7025	19663.6	36.8013	-1.88912	19859.1	38.072	-1.32774	19852.2	38.026	-1.18529	19748.4	37.3427	-0.895345
		6	11467.3	19485.8	35.7102	19553.5	36.1186	-0.442668	19223.4	34.1946	-0.397664	19434.8	35.4071	-1.66915	19704.7	37.0617	-1.12006	19854.4	38.0409	-0.850175	19902.1	38.3631	-0.339539	19794.2	37.6408	-0.0885697
		6.06667	11473.9	19439.3	35.4339	19388.2	35.1341	-1.15089	19225.1	34.204	-0.112004	19497.9	35.7826	-1.01742	19726.4	37.2003	-0.705175	19891.1	38.2885	-0.326407	19849.2	38.0058	-0.420636	19782.5	37.5644	0.111266
		6.13333	11464.3	19570.5	36.2227	19458.1	35.5449	-1.52885	19266.3	34.4356	-0.669159	19439	35.4322	-2.1566	19617.2	36.5105	-2.18372	19852.8	38.03	-1.37354	19913.6	38.4419	-0.77323	19754.3	37.3805	-0.861342
		6.2	11443.6	19496.9	35.7764	19424.6	35.3475	-1.27993	19257.3	34.385	-0.273506	19495.4	35.7673	-1.37515	19674.9	36.8726	-1.37538	19873.3	38.1682	-0.789056	19912.1	38.4316	-0.337279	19834	37.9044	0.108805
		6.26667	11475	19464.4	35.5823	19507.6	35.8406	-0.592721	19258.9	34.394	-0.0703583	19432.1	35.3916	-1.55674	19668.8	36.8337	-1.22018	19937.9	38.6097	-0.153534	19880.7	38.2177	-0.357015	19806.6	37.7225	0.121052
		6.33333	11452.5	19476.5	35.6546	19437.1	35.4211	-1.08458	19215.9	34.1526	-0.384098	19527.5	35.9607	-1.05994	19671.3	36.8494	-1.27678	19816.1	37.7854	-1.05012	19834	37.9041	-0.743002	19747.7	37.3379	-0.335893
		6.4	11482.2	19541	36.0428	19430	35.379	-1.51488	19222.2	34.1878	-0.737132	19417.6	35.3061	-2.10285	19645.5	36.6876	-1.82684	19792.5	37.6301	-1.59363	19855.7	38.0493	-0.985978	19742.1	37.3019	-0.760103
		6.46667	11504.3	19510.9	35.8605	19447.8	35.4842	-1.22741	19242.9	34.3037	-0.438938	19475.6	35.649	-1.57768	19669.1	36.8359	-1.49617	19863.1	38.0992	-0.942244	19840.6	37.9482	-0.904799	19860.1	38.0788	0.199109
		6.53333	11462.3	19497.9	35.7828	19434.3	35.4046	-1.22925	19237.4	34.2731	-0.3918	19448.2	35.4862	-1.66267	19697.2	37.0137	-1.24064	19832.7	37.8957	-1.06798	19771	37.4892	-1.28609	19750.1	37.3533	-0.448619
		6.6	11472.1	19629.3	36.5862	19418.9	35.3139	-2.1234	19223	34.1922	-1.27616	19383.5	35.1068	-2.8455	19588.8	36.3354	-2.72243	19836.4	37.9206	-1.84652	19839.9	37.9439	-1.63477	19693.8	36.9924	-1.61302
		6.66667	11514.3	19527.9	35.9635	19434.3	35.4042	-1.4104	19330.6	34.8013	-0.0442651	19450.5	35.5001	-1.82951	19745.8	37.3255	-1.10954	19809.7	37.7433	-1.40112	19873.4	38.1685	-0.78748	19780.9	37.5538	-0.428913
		6.73333	11478	19437.7	35.4244	19364.1	34.9942	-1.28126	19248.7	34.3365	0.0299996	19391.9	35.1558	-1.63461	19678.3	36.8937	-1.00227	19871	38.1521	-0.453182	19806.3	37.7206	-0.696256	19755.4	37.3879	-0.0556845
		6.8	11504	19494.2	35.7606	19475.5	35.6486	-0.963093	19237.2	34.272	-0.370732	19486.1	35.7122	-1.41456	19638.8	36.6456	-1.5866	19779.8	37.5468	-1.39478	19820.5	37.8149	-0.938232	19747.9	37.3389	-0.440907
		6.86667	11491.7	19519.1	35.91	19452.8	35.5136	-1.24751	19207.8	34.1076	-0.684481	19457	35.5384	-1.73774	19633.1	36.6096	-1.77197	19790.1	37.6144	-1.47649	19797.8	37.6648	-1.23766	19763.9	37.4433	-0.485883
		6.93333	11480.8	19460.2	35.5575	19457.2	35.5395	-0.869061	19209.1	34.1151	-0.324417	19385.8	35.1203	-1.8033	19662.6	36.7946	-1.23447	19824.3	37.8401	-0.898312	19860.3	38.0805	-0.46943	19738.8	37.2806	-0.296043
		7	11495.2	19445.2	35.4688	19453.6	35.5187	-0.801247	19198.4	34.0556	-0.29532	19373.7	35.05	-1.78497	19662.3	36.793	-1.14741	19788.8	37.6054	-1.04431	19798.4	37.6685	-0.792776	19713.5	37.1181	-0.36992
		7.06667	11492.1	19490.7	35.7392	19451.9	35.5083	-1.08205	19274.2	34.4804	-0.140928	19448.5	35.4883	-1.61707	19607.9	36.453	-1.75784	19814.5	37.775	-1.14516	19773.4	37.5049	-1.22679	19774.2	37.5102	-0.248173
		7.13333	11491.7	19533.9	35.9999	19435.8	35.4132	-1.43776	19252	34.3548	-0.527168	19423.8	35.3425	-2.02346	19678.3	36.8939	-1.5776	19758.1	37.405	-1.77582	19744.7	37.3183	-1.67409	19706.4	37.0723	-0.94683
		7.2	11537.4	19450.9	35.5023	19425.1	35.3503	-1.0031	19247.9	34.3317	-0.0527596	19470.6	35.6193	-1.24911	19618.4	36.5183	-1.45558	19803.1	37.6995	-0.983785	19750.7	37.3575	-1.13737	19690.8	36.9732	-0.548329
		7.26667	11547.9	19470.3	35.6177	19454	35.5209	-0.947867	19213.4	34.1388	-0.36096	19400.2	35.2044	-1.77933	19615	36.4974	-1.59184	19833.1	37.8984	-0.900175	19769.9	37.4819	-1.12831	19667.2	36.8237	-0.81319
		7.33333	11475	19508.4	35.8457	19420.7	35.3244	-1.37237	19156.8	33.8254	-0.902389	19435.9	35.4138	-1.79804	19640.5	36.6559	-1.66137	19830.6	37.8817	-1.14493	19813.2	37.7666	-1.07157	19714.6	37.1251	-0.739762
		7.4	11501.1	19464	35.5799	19426	35.3555	-1.07553	19229	34.2258	-0.236207	19430.3	35.381	-1.56504	19644.8	36.6831	-1.36837	19868.4	38.1351	-0.625768	19739.1	37.2824	-1.29005	19753.7	37.3769	-0.222195
		7.46667	11518	19515.7	35.8896	19381.2	35.0937	-1.64699	19200.8	34.0687	-0.702935	19381.8	35.0969	-2.1588	19636.6	36.6316	-1.72953	19745.2	37.3216	-1.74892	19787.6	37.598	-1.28409	19708.8	37.0875	-0.821239
		7.53333	11492.7	19489.2	35.7302	19462.6	35.5721	-1.00918	19204	34.0866	-0.52565	19365.2	35.0009	-2.09544	19607.4	36.4499	-1.75186	19817.3	37.7934	-1.11772	19766	37.4568	-1.26585	19680.7	36.9092	-0.840182
		7.6	11479.8	19470.7	35.6199	19395.2	35.1752	-1.29581	19232.8	34.2474	-0.254601	19400.2	35.2042	-1.78175	19593.3	36.363	-1.7285	19912.7	38.436	-0.364785	19747.5	37.3364	-1.27603	19735.7	37.2602	-0.378826
		7.66667	11506.5	19514.7	35.8839	19463.6	35.5777	-1.15727	19218	34.1646	-0.601358	19352.2	34.9256	-2.32434	19601.9	36.4157	-1.93973	19831.2	37.8854	-1.17938	19744.2	37.3154	-1.56099	19686.4	36.9449	-0.95814
		7.73333	11497.3	19513.6	35.8767	19405.4	35.2346	-1.49318	19248.9	34.3377	-0.421147	19397.1	35.186	-2.0568	19659.2	36.7735	-1.57476	19818.8	37.8036	-1.25408	19710.7	37.1002	-1.76899	19661.7	36.7892	-1.10667
		7.8	11549.1	19521.6	35.9253	19467.3	35.5999	-1.17647	19200.7	34.0682	-0.739126	19447.3	35.4809	-1.81044	19625.4	36.5618	-1.835	19767.8	37.4681	-1.63811	19782.1	37.5618	-1.35598	19715.8	37.1324	-0.8121
		7.86667	11478.7	19456.2	35.5341	19481.9	35.6868	-0.698344	19152.6	33.8026	-0.613564	19348.9	34.9064	-1.99379	19619.5	36.5253	-1.48035	19798.4	37.6685	-1.04656	19762.6	37.4347	-1.09188	19643.2	36.6728	-0.880487
		7.93333	11490.8	19511.3	35.8632	19485.8	35.7103	-1.00398	19176.5	33.9342	-0.811097	19402.9	35.2201	-2.00923	19583.3	36.3014	-2.03336	19730.9	37.2292	-1.81493	19827.9	37.8639	-0.991852	19640.8	36.6579	-1.22454
		8	11496.5	19488.3	35.7248	19472.5	35.631	-0.944941	19162.6	33.8574	-0.749559	19399.7	35.2013	-1.88968	19611.4	36.4746	-1.7218	19770.9	37.4887	-1.41706	19736.7	37.2668	-1.4505	19743.9	37.3136	-0.430431
		8.06667	11493.9	19504	35.8192	19466.2	35.593	-1.0773	19153.2	33.8056	-0.89567	19351.9	34.9237	-2.26158	19511.5	35.8645	-2.42622	19785.3	37.583	-1.41714	19766.6	37.4608	-1.35094	19628.9	36.5838	-1.25459
		8.13333	11497.8	19487.5	35.7205	19464.5	35.583	-0.988579	19262.6	34.4147	-0.187857	19378.5	35.078	-2.0086	19579.9	36.2804	-1.9116	19728.5	37.2144	-1.68704	19750.7	37.3575	-1.3555	19661.5	36.7877	-0.95192
		8.2	11484.8	19490	35.7352	19420.1	35.3206	-1.26563	19192	34.0199	-0.59737	19368.4	35.019	-2.08221	19614.9	36.4962	-1.71051	19843.4	37.9668	-0.949266	19707.7	37.0806	-1.64703	19657.8	36.7643	-0.990081
		8.26667	11511.2	19501.7	35.8052	19498.5	35.7862	-0.870062	19272	34.4677	-0.219589	19417.2	35.304	-1.86731	19632.2	36.6039	-1.67286	19753.4	37.3746	-1.61151	19698.2	37.02	-1.77769	19653.2	36.7358	-1.08853
		8.33333	11490.7	19442.8	35.4546	19471.4	35.6242	-0.681471	19185.3	33.9828	-0.353865	19347.8	34.9005	-1.92016	19506.6	35.8347	-2.0915	19757	37.3978	-1.23766	19697.7	37.0172	-1.42991	19680.6	36.9086	-0.565187
		8.4	11510.7	19463.6	35.5777	19456.3	35.5346	-0.894168	19215.9	34.1528	-0.306975	19394	35.1683	-1.77547	19588.7	36.3344	-1.71484	19687.5	36.9524	-1.80622	19726.8	37.2029	-1.36723	19631.2	36.5982	-0.998676
		8.46667	11493.2	19508.5	35.8464	19451	35.503	-1.19446	19188	33.9978	-0.730669	19334.2	34.8222	-2.39022	19586.2	36.319	-1.9989	19777.1	37.5294	-1.49793	19664.9	36.8093	-2.02957	19596.8	36.3842	-1.48137
		8.53333	11474.8	19568.2	36.2088	19431.1	35.3853	-1.6746	19158.7	33.8363	-1.25457	19425.3	35.3514	-2.22346	19576.3	36.2583	-2.42208	19689.2	36.9629	-2.42682	19743.3	37.3094	-1.8919	19600	36.4045	-1.82348
		8.6	11491.1	19422.3	35.3336	19437	35.4201	-0.764632	19216.1	34.154	-0.0617274	19377.6	35.0725	-1.62724	19506.2	35.8325	-1.9727	19684.3	36.932	-1.58259	19691.8	36.9793	-1.34687	19609.3	36.4615	-0.891275
		8.66667	11515.5	19490.9	35.7408	19399.8	35.2017	-1.39017	19162	33.8544	-0.768497	19372.5	35.0433	-2.06358	19539.3	36.0323	-2.18006	19726.9	37.2038	-1.71787	19756.6	37.3957	-1.33756	19578.2	36.2701	-1.48988
		8.73333	11465.7	19491.8	35.7463	19449.7	35.4953	-1.1021	19244.2	34.3112	-0.31715	19340.8	34.8601	-2.25232	19545.7	36.0714	-2.14644	19681.4	36.9135	-2.01371	19680.4	36.9071	-1.83164	19603.4	36.4255	-1.34001
		8.8	11530.8	19452.4	35.5115	19402.1	35.2152	-1.14741	19156.4	33.8235	-0.570077	19399.2	35.1984	-1.67917	19525.4	35.948	-2.0351	19697.1	37.0132	-1.67928	19702.2	37.0458	-1.45818	19656.5	36.756	-0.774664
		8.86667	11435.2	19482.3	35.6892	19401.3	35.2106	-1.32964	19169.8	33.8972	-0.674108	19331.6	34.8072	-2.24811	19565.2	36.1905	-1.97026	19721.6	37.1698	-1.70035	19680.4	36.9071	-1.77462	19580.1	36.2817	-1.42668
		8.93333	11515.9	19413.5	35.2823	19421.3	35.3279	-0.805491	19195.6	34.0397	-0.124734	19384	35.1099	-1.53853	19512.4	35.8696	-1.88427	19689.1	36.9621	-1.50111	19683.9	36.9295	-1.3453	19589.6	36.3402	-0.961351
		9	11489.8	19450	35.497	19435.6	35.4122	-0.93588	19148.2	33.7786	-0.600496	19366.7	35.0093	-1.85385	19520.5	35.9184	-2.05019	19651.2	36.7233	-1.95466	19759.4	37.4134	-1.0761	19592	36.3547	-1.16151
		9.06667	11467.2	19496.2	35.7725	19330.5	34.8006	-1.82295	19150.6	33.7918	-0.862786	19321.8	34.7506	-2.38792	19539.5	36.0339	-2.21011	19682.1	36.9177	-2.03568	19663.9	36.803	-1.96198	19550.7	36.102	-1.68968
		9.13333	11456.1	19457.9	35.5439	19413.2	35.2805	-1.11445	19144.7	33.7591	-0.666823	19376.9	35.0684	-1.84156	19536.3	36.0145	-2.00093	19704.2	37.0584	-1.66638	19686.8	36.9476	-1.58874	19563.4	36.1795	-1.38354
		9.2	11468.1	19548.3	36.087	19399	35.197	-1.74107	19168.2	33.8886	-1.08049	19375	35.0576	-2.39551	19526.1	35.9524	-2.60615	19669.1	36.8355	-2.43248	19646	36.6901	-2.38938	19539.9	36.0361	-2.07011
		9.26667	11526.2	19494.9	35.7648	19412.7	35.2774	-1.33853	19120.7	33.6282	-1.01868	19357.6	34.9569	-2.17405	19532.2	35.9892	-2.24724	19655.3	36.7488	-2.19694	19634.5	36.6183	-2.139	19560.5	36.1613	-1.62271
		9.33333	11480.5	19452.8	35.5138	19339.2	34.851	-1.51388	19178.7	33.9463	-0.449646	19307.1	34.667	-2.21296	19527.6	35.9614	-2.02401	19617	36.5096	-2.18519	19658.5	36.7691	-1.73722	19525.9	35.9512	-1.58184
		9.4	11473.2	19477.7	35.6615	19361.2	34.9777	-1.53487	19170.9	33.9031	-0.640492	19380.6	35.09	-1.93756	19530.6	35.9798	-2.15324	19636.5	36.631	-2.2114	19708.6	37.0866	-1.56735	19515.2	35.8869	-1.79376
		9.46667	11481.2	19526.3	35.9536	19431.4	35.3871	-1.41759	19176.9	33.9364	-0.899362	19346.7	34.8939	-2.42581	19544.3	36.0627	-2.36253	19688.2	36.9563	-2.1783	19586.7	36.3221	-2.62408	19520.9	35.921	-2.05182
		9.53333	11508.7	19495.2	35.7662	19365.5	35.0024	-1.61486	19148.3	33.7789	-0.869334	19321.2	34.7472	-2.38502	19469.2	35.6111	-2.62661	19713.5	37.118	-1.82905	19658.6	36.7697	-1.989	19558.4	36.1486	-1.63679
		9.6	11506.4	19460.6	35.5598	19469.9	35.6152	-0.795632	19180.1	33.9542	-0.487652	19323.5	34.7608	-2.16506	19540.1	36.037	-1.99435	19637.8	36.639	-2.10172	19644.7	36.6821	-1.87017	19472.2	35.6292	-1.94977
		9.66667	11511.3	19496.2	35.7726	19407.3	35.2455	-1.37824	19138.8	33.7267	-0.92809	19310.4	34.6858	-2.45299	19484.1	35.7	-2.54425	19724.5	37.1884	-1.76519	19624.2	36.5545	-2.2106	19534.9	36.0059	-1.78594
		9.73333	11494.4	19513.3	35.8751	19438.6	35.4299	-1.29624	19109.1	33.5649	-1.19226	19329	34.7922	-2.44902	19512.2	35.8688	-2.47787	19731.1	37.2305	-1.82551	19623	36.547	-2.32057	19558.4	36.1488	-1.74551
		9.8	11538.6	19503.8	35.8182	19412.8	35.2781	-1.39121	19098.2	33.5059	-1.1944	19367.3	35.0126	-2.17167	19510.9	35.8606	-2.42916	19728.3	37.2127	-1.78641	19721.8	37.1707	-1.63996	19613.1	36.4855	-1.35186
		9.86667	11501.9	19451	35.5028	19385.1	35.116	-1.23784	19155.3	33.8176	-0.56723	19292.8	34.5858	-2.28301	19545.2	36.0684	-1.90588	19628.3	36.5798	-2.10385	19641.8	36.664	-1.83123	19514.6	35.8828	-1.63914
		9.93333	11498.2	19432.6	35.3941	19350.1	34.9135	-1.33171	19145.5	33.7637	-0.512449	19297.4	34.6118	-2.14842	19464.5	35.583	-2.2827	19591.5	36.3519	-2.22316	19657.5	36.7629	-1.62367	19591.1	36.3492	-1.06405
		10	11510.2	19467.8	35.6027	19438.5	35.429	-1.02476	19216.1	34.1542	-0.330625	19329.9	34.7974	-2.17135	19482.9	35.6928	-2.38141	19655.2	36.7483	-2.0353	19626.7	36.5698	-2.02538	19525.6	35.9492	-1.67265
		10.0667	11483.3	19431.6	35.3887	19309.6	34.681	-1.55868	19131.1	33.6847	-0.586026	19290.4	34.5719	-2.18281	19456.9	35.5383	-2.32192	19627.8	36.5765	-1.99307	19570.7	36.2237	-2.15747	19487.8	35.7219	-1.68592
		10.1333	11494.6	19447.9	35.4845	19362.4	34.9845	-1.35107	19124.4	33.6485	-0.718119	19334.9	34.8263	-2.0243	19457.3	35.5402	-2.41583	19610	36.4658	-2.1996	19641.5	36.6625	-1.81446	19485.6	35.7087	-1.79501
		10.2	11479.4	19460	35.5565	19349.4	34.9097	-1.49788	19175.2	33.9267	-0.511884	19322	34.7523	-2.17035	19466	35.5919	-2.43616	19599.3	36.3997	-2.3378	19621.6	36.5382	-2.01081	19553.9	36.1212	-1.45452
		10.2667	11513.5	19489.7	35.7332	19336	34.8322	-1.7521	19080	33.4071	-1.20823	19327.2	34.7818	-2.31751	19439	35.4322	-2.77264	19616.4	36.5058	-2.40834	19622.8	36.5455	-2.1802	19514.3	35.8811	-1.8713
		10.3333	11495.7	19435.8	35.4131	19365.2	35.0007	-1.26344	19151.6	33.7969	-0.498315	19237.1	34.2714	-2.50776	19455.7	35.5307	-2.35397	19590.6	36.3461	-2.24794	19679.8	36.9032	-1.50243	19475.6	35.6492	-1.78311
		10.4	11445.4	19432.7	35.3948	19316.8	34.7226	-1.52329	19068.7	33.3461	-0.930774	19254.7	34.3703	-2.39057	19460.8	35.5613	-2.30504	19619.4	36.5246	-2.05114	19625.4	36.5619	-1.82535	19516.5	35.8942	-1.51973
		10.4667	11503.2	19433.1	35.3973	19403.1	35.2213	-1.02707	19192.6	34.0235	-0.255935	19322	34.7521	-2.01131	19415.6	35.2947	-2.57425	19616.8	36.5081	-2.07019	19621.4	36.5369	-1.85297	19461.6	35.5661	-1.85038
		10.5333	11455.5	19463.9	35.5794	19247.3	34.3286	-2.10185	19140.6	33.7368	-0.724731	19293.9	34.5919	-2.35357	19471.9	35.6272	-2.42372	19601.9	36.4158	-2.34449	19603.3	36.4244	-2.14752	19426.6	35.359	-2.23963
		10.6	11477.6	19491	35.741	19357.8	34.9577	-1.63443	19046.4	33.2263	-1.39679	19221.4	34.1832	-2.92391	19455.9	35.5323	-2.68032	19625.8	36.5643	-2.35768	19607.9	36.4529	-2.28061	19519.4	35.9119	-1.84835
		10.6667	11476	19479	35.6693	19323.8	34.7625	-1.75795	19110.6	33.5732	-0.978224	19315	34.7118	-2.32365	19381.8	35.0969	-3.04395	19540	36.0368	-2.81348	19587.8	36.3291	-2.33276	19437.3	35.4218	-2.26668
		10.7333	11454.8	19408.9	35.2552	19314.7	34.7103	-1.39596	19135.1	33.7065	-0.430843	19272.2	34.4687	-2.15265	19491.6	35.7449	-1.9819	19669.2	36.836	-1.60013	19599.3	36.3997	-1.84801	19453	35.5149	-1.75948
		10.8	11438.1	19435.7	35.4127	19318.4	34.7313	-1.53251	19071.4	33.361	-0.933868	19277.5	34.4989	-2.2799	19439.1	35.4329	-2.45142	19592.2	36.3559	-2.23776	19581.4	36.2894	-2.11584	19426.5	35.3585	-2.07338
		10.8667	11495.7	19412.7	35.2773	19336.4	34.8346	-1.29376	19112.5	33.5836	-0.575845	19298.2	34.616	-2.0274	19425.8	35.3543	-2.39457	19526.3	35.9536	-2.50464	19553.3	36.1174	-2.15241	19378.3	35.077	-2.21954
		10.9333	11506.9	19411.8	35.2721	19298.4	34.6176	-1.50554	19099.2	33.5109	-0.643256	19243.7	34.3085	-2.32969	19427.7	35.3654	-2.37829	19613	36.4845	-1.9685	19581.6	36.2909	-1.97368	19416.2	35.2976	-1.99364
		11	11486.4	19473.4	35.6361	19375.5	35.0602	-1.42691	19114	33.5915	-0.926623	19309.5	34.6808	-2.3214	19352.4	34.9265	-3.18115	19510.6	35.8592	-2.95782	19654.8	36.7457	-1.88288	19471.1	35.6221	-2.03315
		11.0667	11472.9	19415.1	35.2913	19260	34.3999	-1.7425	19049.7	33.244	-0.929387	19355.4	34.9443	-1.71311	19437	35.4201	-2.34273	19503.2	35.8143	-2.65795	19544.7	36.0653	-2.2185	19440	35.4383	-1.87222
		11.1333	11493.2	19446.3	35.4753	19320.2	34.7415	-1.58487	19089.4	33.458	-0.899367	19232.7	34.2464	-2.595	19375.1	35.0582	-2.88863	19583.2	36.3008	-2.35543	19570.5	36.2227	-2.24509	19429.1	35.3737	-2.12083
		11.2	11453.8	19449.8	35.4958	19353.6	34.9336	-1.41325	19099.6	33.5134	-0.864476	19313.3	34.7023	-2.15963	19472.6	35.6311	-2.33624	19560.1	36.1593	-2.51747	19637.8	36.6392	-1.8491	19497	35.7773	-1.73766
		11.2667	11464.9	19397.8	35.1903	19289.6	34.5674	-1.47399	19098.7	33.5084	-0.563982	19255.8	34.3766	-2.17981	19396.5	35.1827	-2.47922	19598.1	36.3927	-1.97857	19479.5	35.6723	-2.51055	19336.6	34.8357	-2.37382
		11.3333	11441.3	19524.4	35.942	19372.8	35.0446	-1.74847	19143.1	33.7506	-1.07347	19271.2	34.4632	-2.84484	19372.9	35.0452	-3.36834	19506.3	35.8332	-3.28972	19552.2	36.1109	-2.82359	19345.4	34.8862	-3.07499
		11.4	11397	19510.4	35.8575	19286.5	34.5497	-2.15886	19064.6	33.3245	-1.41515	19233.6	34.2518	-2.97185	19419.6	35.3176	-3.01143	19464	35.5803	-3.45819	19508.1	35.8439	-3.00612	19406.6	35.2415	-2.63521
		11.4667	11503.5	19518.2	35.9047	19264.7	34.4267	-2.32917	19057.6	33.2868	-1.50003	19278.4	34.5037	-2.7671	19425.1	35.3499	-3.02637	19574.7	36.2485	-2.8372	19551.4	36.1061	-2.79112	19372.3	35.042	-2.88192
		11.5333	11490.3	19455.8	35.5316	19302.8	34.6424	-1.74026	19082.6	33.4213	-0.992458	19304.1	34.6501	-2.24761	19416.9	35.3021	-2.70111	19488.4	35.7255	-2.98701	19534.1	36.0008	-2.52327	19385.1	35.116	-2.43481
		11.6	11507.3	19415.3	35.2929	19221.6	34.1847	-1.95924	19029.4	33.1355	-1.0394	19230.4	34.2337	-2.42524	19367.9	35.0162	-2.74826	19568.4	36.2098	-2.26401	19630.1	36.5913	-1.69401	19425.8	35.354	-1.95803
		11.6667	11523.8	19436.6	35.4179	19292.8	34.5854	-1.68359	19083.4	33.4254	-0.874534	19243.5	34.3073	-2.47666	19473.8	35.6386	-2.25089	19553	36.1157	-2.48317	19470.7	35.6199	-2.79051	19419.1	35.3151	-2.12197
		11.7333	11417.2	19397	35.1857	19231.9	34.2423	-1.7945	19092.8	33.4767	-0.591095	19211.8	34.13	-2.42183	19404.6	35.2301	-2.42713	19492.2	35.7484	-2.6182	19572.3	36.2338	-1.94443	19418.6	35.3121	-1.89275
		11.8	11481.2	19468.1	35.6048	19239.1	34.2827	-2.1732	19071.4	33.3609	-1.12603	19240.9	34.2926	-2.67827	19329.1	34.793	-3.28342	19478.6	35.667	-3.11876	19503	35.8132	-2.78408	19392.5	35.1594	-2.4646
		11.8667	11488.7	19420.6	35.3237	19299.5	34.6235	-1.5513	19120.3	33.6257	-0.580107	19265.5	34.4312	-2.2586	19362.4	34.9847	-2.81057	19514.3	35.881	-2.62363	19596.7	36.3837	-1.93258	19387	35.1271	-2.21579
		11.9333	11457.1	19429.3	35.3747	19262.4	34.4136	-1.81222	19053.5	33.2647	-0.992117	19199.7	34.0628	-2.67802	19369.4	35.0253	-2.821	19511.3	35.8633	-2.69236	19472.8	35.6325	-2.73476	19368.2	35.018	-2.37586
		12	11486.7	19385.2	35.117	19245.8	34.3198	-1.64825	19048.7	33.2389	-0.760182	19222.2	34.1881	-2.29495	19425.3	35.3514	-2.23713	19522	35.9278	-2.37007	19499.9	35.7947	-2.31477	19355.1	34.9423	-2.19391
		12.0667	11456	19389.7	35.143	19289.8	34.5684	-1.42567	19066.4	33.3342	-0.690961	19259.1	34.395	-2.11411	19335.3	34.8281	-2.78648	19477.7	35.662	-2.66197	19504.5	35.8225	-2.31308	19340.6	34.8586	-2.30363
		12.1333	11429.2	19383.2	35.105	19247.7	34.331	-1.62512	19028.1	33.1286	-0.858588	19199.5	34.0615	-2.40963	19419.5	35.3172	-2.25939	19509	35.8491	-2.43689	19552.8	36.1144	-1.98311	19361.6	34.9798	-2.14442
		12.2	11462.8	19377.6	35.0725	19186.5	33.9895	-1.934	19025.5	33.115	-0.839579	19227.5	34.2174	-2.22111	19380.9	35.0919	-2.45209	19498.1	35.7835	-2.46986	19501.1	35.8019	-2.26302	19409	35.2559	-1.83571
		12.2667	11460.5	19470.6	35.6197	19253.5	34.3631	-2.10767	19033.6	33.158	-1.34381	19218.9	34.1694	-2.81645	19334.1	34.8213	-3.26993	19446.3	35.4754	-3.32522	19442.6	35.4536	-3.15864	19261.9	34.411	-3.22794
		12.3333	11454.5	19439.4	35.4345	19309.8	34.6823	-1.60332	19003.1	32.9954	-1.32115	19257	34.3829	-2.41772	19378.1	35.0757	-2.83037	19462.1	35.5686	-3.04681	19487.1	35.7178	-2.70923	19332	34.8094	-2.64424
		12.4	11477.6	19412.7	35.2773	19343.2	34.8735	-1.2549	19037.9	33.1811	-0.978337	19199.7	34.0629	-2.58057	19382.1	35.0986	-2.65034	19494.2	35.7606	-2.6977	19474.9	35.6448	-2.625	19327.8	34.7854	-2.51111
		12.4667	11440	19373.3	35.0475	19337.3	34.8397	-1.05887	19013.5	33.0508	-0.878813	19205.8	34.0965	-2.31713	19347.2	34.8969	-2.62215	19464.3	35.5817	-2.64677	19415.3	35.2927	-2.74729	19357.9	34.9583	-2.10834
		12.5333	11442.7	19441	35.4437	19258.3	34.3902	-1.90455	19142.7	33.7481	-0.577661	19226.3	34.2107	-2.59905	19361.2	34.9773	-2.93791	19477.7	35.6617	-2.96294	19425.8	35.3545	-3.08165	19309.4	34.6803	-2.78259
		12.6	11529.8	19451.9	35.5081	19267.2	34.4407	-1.91854	19079.8	33.4063	-0.983953	19203.4	34.0832	-2.79105	19417.9	35.308	-2.67172	19487.1	35.7182	-2.9709	19487.8	35.7218	-2.77885	19324.3	34.7655	-2.76185
		12.6667	11488.9	19471.9	35.6274	19248.3	34.3342	-2.1443	19027.2	33.1239	-1.38559	19266.6	34.4373	-2.55616	19410.5	35.2647	-2.83422	19420.8	35.325	-3.48331	19452.9	35.5144	-3.1055	19290.1	34.5702	-3.07638
		12.7333	11424.1	19416.5	35.2997	19275.9	34.49	-1.66079	19072.2	33.3651	-0.816688	19250.8	34.3483	-2.31752	19395.2	35.1749	-2.59637	19551	36.1035	-2.37715	19449.4	35.4937	-2.79853	19301.7	34.636	-2.68289
		12.8	11488.1	19425.8	35.354	19215.6	34.1509	-2.05414	19043.5	33.2111	-1.02496	19222.2	34.1882	-2.53195	19400.5	35.206	-2.61954	19449.6	35.4948	-3.0401	19416.6	35.3001	-3.0464	19251.3	34.351	-3.02215
		12.8667	11481.9	19376.4	35.0658	19227.4	34.217	-1.69988	19023	33.1014	-0.846489	19165.6	33.8738	-2.55809	19415.2	35.2918	-2.24563	19460.1	35.5572	-2.68953	19507.2	35.8384	-2.21996	19277.1	34.4967	-2.58829
		12.9333	11425.5	19403.8	35.2251	19259.2	34.3953	-1.68085	19032.6	33.1529	-0.954337	19154.8	33.8146	-2.77658	19371.9	35.0396	-2.65708	19482.3	35.6893	-2.71675	19420.9	35.3257	-2.8919	19259.5	34.3974	-2.84694
		13	11429.2	19449.6	35.495	19268.8	34.4498	-1.8963	19011.6	33.0406	-1.33648	19227.8	34.219	-2.64215	19321.7	34.7503	-3.21632	19492.7	35.7513	-2.92466	19429.5	35.3763	-3.11119	19389.4	35.1414	-2.37284
		13.0667	11430.3	19374.3	35.0535	19359.2	34.966	-0.938583	19007.6	33.0196	-0.91597	19237	34.271	-2.1486	19358.8	34.9638	-2.56123	19499.4	35.7915	-2.44288	19424.9	35.3491	-2.69684	19289.6	34.5676	-2.5051
		13.1333	11465.9	19355.6	34.9452	19221.9	34.1863	-1.60999	19017.6	33.0726	-0.754764	19106.2	33.5493	-2.76199	19335.5	34.8292	-2.58756	19402.6	35.2184	-2.90776	19439.3	35.4338	-2.50394	19295.1	34.5984	-2.36606
		13.2	11443.3	19420.8	35.3248	19281.3	34.5202	-1.65563	18976.2	32.8532	-1.35366	19181.8	33.9633	-2.72756	19335.4	34.8289	-2.96741	19444.8	35.4662	-3.03953	19419.4	35.3167	-3.00057	19303.2	34.6449	-2.69906
		13.2667	11419.5	19427.9	35.3667	19328.7	34.7906	-1.4272	19067.2	33.3384	-0.910402	19232.4	34.2452	-2.48762	19318.2	34.7302	-3.10801	19441.5	35.4467	-3.10089	19517.9	35.9028	-2.45639	19247.2	34.328	-3.0579
		13.3333	11404.7	19385	35.1159	19140.3	33.7352	-2.23175	19012.1	33.0436	-0.954396	19142.7	33.748	-2.73392	19350.4	34.9151	-2.67235	19465.5	35.5891	-2.70766	19386.3	35.123	-2.98536	19271.8	34.4664	-2.66864
		13.4	11421.2	19376.8	35.0681	19223.2	34.1935	-1.72569	18999.4	32.9758	-0.974327	19185	33.981	-2.45319	19323.3	34.7596	-2.78003	19465.4	35.5887	-2.66028	19406.2	35.2391	-2.82147	19239.8	34.2864	-2.80089
		13.4667	11436	19422.9	35.3373	19238.4	34.2785	-1.90981	19016.3	33.0655	-1.15382	19208.2	34.1098	-2.59356	19288.4	34.5606	-3.24825	19444.7	35.4659	-3.05229	19414.7	35.2889	-3.04086	19259.3	34.3963	-2.96015
		13.5333	11448.6	19402.4	35.2173	19188.8	34.0023	-2.06605	19003.3	32.9965	-1.10287	19215.9	34.1526	-2.43081	19290.3	34.5714	-3.11741	19422.7	35.3363	-3.06195	19429.6	35.3766	-2.83319	19211	34.1253	-3.11116
		13.6	11408.8	19370.3	35.0304	19208.6	34.1119	-1.76951	19018.6	33.0779	-0.834555	19220.1	34.1764	-2.22004	19303.7	34.6477	-2.85419	19430.3	35.3806	-2.83074	19386.6	35.1248	-2.89803	19254.7	34.3699	-2.67968
		13.6667	11422.5	19466	35.5921	19229.9	34.2311	-2.21209	18971.3	32.8274	-1.64676	19188.6	34.0011	-2.95705	19281.3	34.5205	-3.54312	19427.2	35.3623	-3.41075	19400.1	35.2034	-3.38115	19235.2	34.2609	-3.3504
		13.7333	11430.5	19446.8	35.4781	19239.3	34.2837	-2.04552	19054.9	33.2723	-1.0879	19106.7	33.5518	-3.29238	19342.1	34.8672	-3.08249	19408.4	35.2519	-3.40712	19462.9	35.5737	-2.89689	19241.9	34.2982	-3.19913
		13.8	11428.8	19397.2	35.1867	19240.2	34.2885	-1.7492	18931.8	32.6199	-1.44887	19156.2	33.8223	-2.73046	19330.6	34.8013	-2.85695	19386.1	35.1219	-3.24569	19457.5	35.5416	-2.63754	19258.5	34.3915	-2.81431
		13.8667	11477.8	19413.4	35.2818	19191.2	34.0152	-2.1176	19024.9	33.1116	-1.0523	19245	34.3153	-2.33254	19439.7	35.4362	-2.31712	19459.1	35.551	-2.91173	19367.9	35.0163	-3.25798	19263	34.4168	-2.88414
		13.9333	11462.2	19452.6	35.5124	19250.9	34.3487	-2.01477	18990.3	32.9277	-1.46672	19146.5	33.769	-3.1095	19308.4	34.6745	-3.30939	19444.9	35.4671	-3.22619	19349.4	34.9096	-3.59531	19262.6	34.4149	-3.1167
		14	11457.1	19432.4	35.3934	19254.4	34.3684	-1.87603	18912.4	32.5189	-1.75657	19184.3	33.9772	-2.78223	19275.5	34.4876	-3.37734	19368.3	35.0185	-3.55578	19443.9	35.4613	-2.92459	19239.1	34.2825	-3.13003
		14.0667	11484.9	19376.3	35.0652	19188.1	33.9983	-1.91791	18951.4	32.7229	-1.22434	19207.6	34.1063	-2.32495	19280.8	34.5173	-3.01944	19401.4	35.2115	-3.03455	19392.7	35.1602	-2.89744	19220.8	34.1801	-2.9042
		14.1333	11433.7	19389.8	35.1434	19230	34.2313	-1.76325	18930	32.6106	-1.41492	19130.4	33.6808	-2.82872	19267.9	34.4444	-3.17058	19402.3	35.2165	-3.10783	19384.4	35.1124	-3.02355	19210.5	34.1227	-3.03996
		14.2	11433.2	19410.2	35.263	19210.6	34.123	-1.99107	19028.2	33.1291	-1.01597	19165.7	33.8744	-2.7547	19305.4	34.657	-3.07759	19423.1	35.3386	-3.10536	19383.3	35.1059	-3.1496	19232.5	34.2456	-3.03656
		14.2667	11454	19402.7	35.2187	19194.1	34.0318	-2.03801	18950.6	32.7184	-1.38242	19114.4	33.594	-2.99081	19338.1	34.8447	-2.84559	19313.9	34.7056	-3.694	19380.2	35.0876	-3.12361	19173	33.9151	-3.32278
		14.3333	11480.6	19415.8	35.2958	19262.7	34.4152	-1.73173	18990.5	32.9289	-1.24902	19093.8	33.4817	-3.18019	19292.7	34.585	-3.1824	19328	34.7865	-3.69028	19361.4	34.9786	-3.30976	19249.1	34.3386	-2.97647
		14.4	11407.3	19470.6	35.6193	19197.2	34.0489	-2.42148	18999.8	32.978	-1.52337	19110.2	33.571	-3.41445	19267.8	34.4442	-3.64667	19464.5	35.5833	-3.21697	19333.6	34.8185	-3.79331	19244.8	34.3145	-3.32403
		14.4667	11445.4	19365.5	35.0026	19176.1	33.9318	-1.9219	18980.6	32.8767	-1.00801	19097.5	33.502	-2.86669	19252	34.3548	-3.11941	19426.8	35.3602	-2.82335	19351.6	34.9224	-3.07269	19231.6	34.2405	-2.78131
		14.5333	11419.4	19392.3	35.158	19249.3	34.3397	-1.66942	18943	32.6788	-1.36128	19147.4	33.7741	-2.75005	19358.4	34.9614	-2.66818	19407.7	35.248	-3.09095	19322.7	34.7561	-3.39444	19260.5	34.4026	-2.77463
		14.6	11465.2	19395.1	35.1746	19165.8	33.8752	-2.15053	18960.1	32.7685	-1.28824	19100.4	33.5174	-3.02326	19224.8	34.2025	-3.44367	19423.2	35.3389	-3.0166	19331.7	34.8078	-3.35931	19194.6	34.0343	-3.15952
		14.6667	11426.9	19378.6	35.0785	19223.9	34.1972	-1.73235	18971.4	32.8281	-1.13247	19098.9	33.5095	-2.93513	19292.5	34.5839	-2.96618	19388.5	35.1362	-3.1232	19292.2	34.5822	-3.48877	19216	34.1531	-2.94455
		14.7333	11435.7	19372.4	35.0424	19176.9	33.9366	-1.95689	18976.5	32.8548	-1.06968	19168.5	33.8898	-2.51865	19247.2	34.3277	-3.18623	19406.9	35.2433	-2.98001	19360.7	34.9745	-3.06042	19312.2	34.696	-2.36558
		14.8	11426.4	19412	35.2731	19220.3	34.1776	-1.9466	19025.4	33.1141	-1.04113	19100.1	33.5158	-3.12335	19265.6	34.4314	-3.3133	19423.5	35.3409	-3.1131	19327.8	34.7856	-3.48004	19281.5	34.5214	-2.77089
		14.8667	11509.9	19387.8	35.132	19219.3	34.1718	-1.81132	18910.3	32.508	-1.50611	19066.7	33.3354	-3.1627	19260.1	34.4008	-3.20278	19397.1	35.1863	-3.12669	19324.1	34.764	-3.36048	19218.8	34.1691	-2.98211
		14.9333	11471.5	19414.2	35.2861	19215.6	34.1509	-1.98625	18914.9	32.5318	-1.63637	19142.1	33.7452	-2.90695	19292.6	34.5845	-3.17311	19376.9	35.0685	-3.39849	19276.9	34.4957	-3.78293	19188.5	34.0005	-3.30474
		15	11459.9	19380.3	35.0881	19151.5	33.7964	-2.14276	18908.6	32.4991	-1.47115	19070.3	33.3551	-3.09914	19262.6	34.4147	-3.145	19353.9	34.9353	-3.33375	19373.9	35.0512	-3.02938	19178.9	33.9475	-3.15981
		15.0667	11447.5	19404.1	35.2271	19157.3	33.8284	-2.24968	18977.3	32.859	-1.25017	19120.4	33.6264	-2.96677	19270.2	34.4575	-3.2411	19297.6	34.6128	-3.79523	19379.4	35.0831	-3.13647	19121.4	33.6317	-3.61458
		15.1333	11463.8	19461.6	35.5657	19201.7	34.0737	-2.34315	18953.9	32.7357	-1.71209	19188.6	34.0013	-2.93056	19242.6	34.3021	-3.73516	19396.7	35.1838	-3.56285	19267.9	34.4446	-4.11359	19238.7	34.2803	-3.30462
		15.2	11469.6	19430.1	35.3799	19219.4	34.1724	-2.05853	18942.3	32.675	-1.58692	19164.4	33.8677	-2.87826	19257.1	34.3838	-3.46761	19357	34.9532	-3.60763	19343.9	34.8776	-3.49477	19172	33.9095	-3.48958
		15.2667	11421.9	19375.7	35.0617	19176.5	33.9339	-1.9788	18971.5	32.8283	-1.11543	19137	33.7168	-2.71092	19251.7	34.3535	-3.17973	19423.3	35.3396	-2.90302	19277.5	34.499	-3.55513	19163.8	33.8643	-3.21651
		15.3333	11404.1	19393.6	35.1659	19184.4	33.978	-2.03899	18888.3	32.3938	-1.65426	19157.2	33.8279	-2.70411	19284.1	34.5361	-3.10136	19349.4	34.9094	-3.43743	19384.8	35.1143	-3.04413	19187.1	33.9927	-3.19245
		15.4	11442.7	19414.2	35.2864	19134.3	33.7023	-2.43522	18973.1	32.8371	-1.33139	19207	34.1031	-2.54938	19275.8	34.489	-3.26897	19341.9	34.8663	-3.60109	19308.3	34.6737	-3.60518	19173.2	33.916	-3.38955
		15.4667	11495.4	19391.4	35.1528	19151.1	33.7945	-2.20942	18901	32.4596	-1.57529	19150.7	33.7924	-2.72652	19252.3	34.3566	-3.26776	19334.8	34.8252	-3.50853	19322.2	34.7531	-3.39223	19231	34.2369	-2.93507
		15.5333	11443.8	19365.1	34.9999	19158	33.8321	-2.01894	18930.4	32.6126	-1.26941	19119.5	33.6218	-2.74425	19248	34.3325	-3.13898	19421.9	35.3312	-2.84968	19312.3	34.6966	-3.29582	19155.7	33.8198	-3.19933
		15.6	11457.8	19438.9	35.4316	19200.7	34.0682	-2.21449	18915.4	32.5344	-1.77928	19156.9	33.8263	-2.97141	#LOW	#VALUE!	#VALUE!	19335.5	34.8297	-3.78276	19338.1	34.8445	-3.57955	19139.6	33.731	-3.71972
		15.6667	11472.3	19372.8	35.0448	19155.2	33.8167	-2.07922	18949.9	32.715	-1.21192	19143.2	33.751	-2.65997	19177.1	33.9375	-3.57891	19322.7	34.7563	-3.46947	19283.2	34.5311	-3.50626	19143.6	33.7533	-3.31068
		15.7333	11425	19382.1	35.0986	19074.8	33.3792	-2.57055	19036	33.1711	-0.809611	19154.6	33.8136	-2.65114	19265.5	34.4313	-3.13894	19313	34.7006	-3.57892	19371.4	35.0367	-3.05446	19174.6	33.9237	-3.19413
		15.8	11467.6	19404.6	35.2301	19168.9	33.8924	-2.18882	18865.5	32.2761	-1.83612	19082	33.4183	-3.17791	19236.4	34.2671	-3.43459	19313.1	34.7012	-3.70988	19300.3	34.6281	-3.59452	19151.5	33.7963	-3.45306
		15.8667	11460	19388.6	35.1364	19212.1	34.1317	-1.85573	18899.6	32.4526	-1.56592	19124.4	33.6485	-2.85398	19246	34.3211	-3.28685	19337.3	34.8397	-3.47761	19295.8	34.6029	-3.52603	19173.8	33.9192	-3.23639
		15.9333	11421.9	19385.6	35.119	19102.3	33.5282	-2.44194	18947.2	32.7005	-1.30067	19110.2	33.5708	-2.91438	19255.2	34.3731	-3.2175	19304.8	34.6539	-3.64607	19356.7	34.9516	-3.15997	19222	34.1868	-2.95148
		16	11427	19516.5	35.8942	19131.5	33.6872	-3.05815	18916.5	32.5401	-2.23621	19077.7	33.3948	-3.86552	19355.6	34.9455	-3.42028	19328.7	34.7907	-4.28447	19298.9	34.6201	-4.26659	19173.9	33.92	-3.99337
		16.0667	11436.1	19377.9	35.0741	19156.2	33.8225	-2.10274	18952.3	32.7275	-1.22877	19120.6	33.6276	-2.81268	19286.4	34.5492	-2.99646	19299.7	34.6248	-3.6303	19267.8	34.4439	-3.62269	19152.4	33.8013	-3.29197
		16.1333	11452.1	19446	35.4732	19179.5	33.9509	-2.37336	18919.2	32.5541	-1.80117	19096.5	33.4967	-3.34258	19294.6	34.5959	-3.34886	19334.6	34.8242	-3.82996	19290.7	34.5734	-3.89232	19108.1	33.5592	-3.93316
		16.2	11455.3	19411.6	35.271	19234.3	34.2556	-1.8665	18955.1	32.742	-1.41107	19167	33.8817	-2.75537	19233.9	34.2532	-3.48938	19364.8	34.9986	-3.45335	19242	34.2986	-3.9649	19137.6	33.7203	-3.56986
		16.2667	11455.1	19464.9	35.5854	19130.7	33.6825	-2.75396	18898	32.4442	-2.02323	19106.3	33.5495	-3.40193	19236.9	34.2703	-3.78666	19284.6	34.5389	-4.22737	19291.9	34.5806	-3.99723	19138.7	33.7266	-3.87793
		16.3333	11481.8	19460.4	35.5588	19234.2	34.2553	-2.15461	18969.6	32.8184	-1.62254	19099.6	33.5133	-3.41166	19227.1	34.2152	-3.8152	19305.7	34.6592	-4.08061	19298.5	34.6182	-3.93315	19180.3	33.955	-3.62302
		16.4	11424.1	19397.9	35.191	19142.3	33.7459	-2.2962	18905.8	32.4845	-1.58863	19109.2	33.5652	-2.9919	19217.3	34.1608	-3.50176	19294.9	34.5975	-3.77448	19220.5	34.1786	-4.00488	19087.9	33.4501	-3.76011
		16.4667	11522.3	19421.8	35.331	19148.2	33.7782	-2.40385	18883.6	32.3692	-1.84388	19070.1	33.3538	-3.34332	19216.4	34.1555	-3.64702	19404.2	35.2274	-3.28453	19235.6	34.2628	-4.0607	19162.7	33.8579	-3.4923
		16.5333	11452.2	19458	35.5444	19206.2	34.0988	-2.29673	18872.4	32.3114	-2.11515	19131.1	33.685	-3.22554	19245.8	34.3201	-3.69584	19279.7	34.5112	-4.21416	19268.7	34.4489	-4.08798	19104.4	33.5394	-4.02417
		16.6	11476.7	19419.8	35.319	19179.6	33.9516	-2.21853	19004.4	33.0023	-1.19878	19060.8	33.3036	-3.38157	19223.8	34.1968	-3.59382	19269.1	34.4515	-4.04849	19300.5	34.6296	-3.68194	19078.6	33.3999	-3.93834
		16.6667	11430.7	19387.7	35.1313	19202.2	34.0765	-1.90579	18945.4	32.6911	-1.32223	19123.8	33.6448	-2.8525	19204.7	34.0907	-3.51212	19323.9	34.7631	-3.54911	19253.4	34.3626	-3.76111	19076.1	33.3861	-3.76433
		16.7333	11451.7	19374.6	35.0554	19171	33.9039	-2.00258	18953	32.7312	-1.20627	19095.6	33.4918	-2.92965	19248.8	34.3372	-3.18974	19341	34.8611	-3.37516	19245.1	34.3162	-3.73162	19130.7	33.6825	-3.39201
		16.8	11443.3	19373.5	35.0488	19117.6	33.6109	-2.28895	18955.5	32.7445	-1.1864	19085	33.4345	-2.98038	19255.7	34.3759	-3.14448	19296.6	34.6071	-3.62263	19288.4	34.5607	-3.48062	19106.3	33.55	-3.51799
		16.8667	11448.6	19396.7	35.1838	19122.1	33.6354	-2.39947	18937.4	32.6495	-1.41642	19022.9	33.1011	-3.44887	19193.9	34.0306	-3.62482	19337.6	34.8417	-3.52307	19310.7	34.6874	-3.48898	19109.8	33.5686	-3.63445
		16.9333	11479.8	19400.2	35.2044	19085.8	33.4388	-2.61667	18852.5	32.2092	-1.87729	19056.5	33.2807	-3.28983	19196	34.0421	-3.63391	19312.8	34.6993	-3.68609	19244.6	34.3131	-3.88379	19074.1	33.3757	-3.84791
		17	11465.7	19391.9	35.1559	19084.2	33.4302	-2.57683	18881.7	32.3595	-1.67853	19049.8	33.2448	-3.27718	19191.5	34.0174	-3.61013	19295.1	34.5985	-3.73838	19226.5	34.2122	-3.93622	19094.3	33.4844	-3.69075
		17.0667	11469.6	19404	35.2264	19140.7	33.7375	-2.33996	18886.3	32.3833	-1.72517	19058.9	33.2934	-3.29912	19212.6	34.1345	-3.56347	19277.9	34.5012	-3.90613	19168.3	33.8889	-4.32992	19082.2	33.4192	-3.82633
		17.1333	11457.2	19377	35.0691	19113.3	33.5879	-2.33223	18974.9	32.8464	-1.10477	19030.9	33.1434	-3.29177	19151.9	33.7986	-3.74206	19308.2	34.6732	-3.5768	19199.6	34.0619	-3.99969	19090.4	33.4636	-3.62467
		17.2	11469.3	19436.5	35.4174	19201.8	34.0746	-2.19394	18883.5	32.369	-1.93048	19109.8	33.5687	-3.21476	19175	33.9259	-3.96311	19299.2	34.6218	-3.97659	19254.9	34.3712	-4.03871	19061	33.3049	-4.13174
		17.2667	11439.4	19357.4	34.9554	19142	33.7443	-2.06216	18957.1	32.7525	-1.08505	19044.9	33.2187	-3.10279	19232.3	34.2442	-3.18278	19284.8	34.5402	-3.59615	19182.5	33.9672	-3.98075	19011.9	33.0425	-3.93215
		17.3333	11484.3	19416.1	35.2975	19209.3	34.1161	-2.03257	18907.7	32.4944	-1.68527	19049.9	33.2454	-3.4182	19252.3	34.3568	-3.4123	19275.3	34.4862	-3.99231	19252.4	34.3573	-3.93271	18994.7	32.951	-4.36571
		17.4	11485.8	19409.6	35.2593	19137.5	33.7199	-2.39049	18964.2	32.7902	-1.35121	19090	33.4613	-3.16417	19137.4	33.7195	-4.01137	19253.2	34.3619	-4.07842	19173.8	33.9192	-4.33267	19059.5	33.2968	-3.9817
		17.4667	11471.3	19359.9	34.9698	19146	33.7665	-2.05442	18901.3	32.461	-1.39091	19036.1	33.1714	-3.1645	19219.1	34.1704	-3.27099	19270.8	34.4611	-3.68969	19193.3	34.0274	-3.93499	19151.5	33.7964	-3.19266
		17.5333	11520.1	19455.7	35.5311	19146.7	33.7702	-2.61192	18896.1	32.4344	-1.97875	19068.5	33.3451	-3.55207	19187.5	33.9952	-4.00741	19251.7	34.3532	-4.3588	19174.5	33.923	-4.60052	19038.4	33.184	-4.3663
		17.6	11458.6	19390.8	35.1494	19165.9	33.8756	-2.12489	18871.9	32.3092	-1.72228	19039.4	33.189	-3.32645	19147.8	33.7761	-3.8449	19304.7	34.653	-3.67728	19141.8	33.7433	-4.39855	19041.9	33.2023	-3.96625
		17.6667	11491.4	19335.2	34.8275	19098	33.5044	-2.17414	18874	32.3196	-1.39	19050.7	33.2496	-2.94398	19190	34.0089	-3.29016	19267.5	34.442	-3.56639	19178.1	33.9428	-3.87719	19043.6	33.2117	-3.635
		17.7333	11464.1	19523.4	35.9362	19126.4	33.6591	-3.12821	18876	32.3304	-2.48795	18996.9	32.9627	-4.33965	19163.9	33.8647	-4.54312	19251.2	34.3502	-4.76692	19138.2	33.7238	-5.20496	19106.5	33.5507	-4.40476
		17.8	11467.1	19341.4	34.8632	19120.7	33.6283	-2.08599	18861.4	32.2549	-1.4904	19013.7	33.0518	-3.17751	19175.1	33.9264	-3.40836	19267.1	34.4401	-3.60401	19146.3	33.7681	-4.08764	19044.4	33.2158	-3.66664
		17.8667	11500.5	19450.7	35.5013	19142.5	33.7473	-2.60508	18896.1	32.434	-1.94937	19015.1	33.0596	-3.80777	19136.8	33.7158	-4.25711	19253.3	34.3625	-4.31971	19188.3	33.9993	-4.49453	19015.1	33.0595	-4.46099
		17.9333	11482.9	19374.7	35.056	19138.4	33.7249	-2.1822	18921.5	32.5663	-1.37176	19046.4	33.2268	-3.19534	19127.1	33.6632	-3.86435	19191.5	34.0173	-4.21962	19135.4	33.7082	-4.3403	19046	33.2243	-3.85088
		18	11501.3	19374	35.052	19141	33.7389	-2.1642	18880.7	32.3546	-1.57952	18987.2	32.9112	-3.50688	19188.7	34.0018	-3.52178	19224	34.1979	-4.035	19114.1	33.5922	-4.4523	19100.7	33.5191	-3.55208
		18.0667	11523.3	19362.1	34.983	19154.7	33.814	-2.02008	18955.2	32.7429	-1.12215	19039.8	33.1913	-3.15774	19102.3	33.528	-3.9265	19212	34.1311	-4.03278	19137.5	33.7198	-4.25568	19001	32.9843	-4.01787
		18.1333	11471.3	19408.9	35.2549	19115.9	33.6021	-2.50386	18904.4	32.4774	-1.65959	18997.2	32.964	-3.65697	19146.8	33.7706	-3.95591	19215.4	34.1503	-4.28559	19154.6	33.8138	-4.43359	19000.3	32.9805	-4.29355
		18.2	11514	19353.5	34.9332	19129.2	33.6746	-2.10966	18879.7	32.3494	-1.46583	19005.6	33.0088	-3.29044	19095.9	33.4931	-3.91169	19215.9	34.1527	-3.96141	19132	33.69	-4.23569	19000.9	32.9839	-3.96847
		18.2667	11412	19376.1	35.0639	19127.4	33.6648	-2.2502	18856.9	32.2316	-1.71444	18998.7	32.9721	-3.45789	19189.5	34.006	-3.52952	19219.4	34.1723	-4.07251	19181.8	33.9632	-4.09317	18987.5	32.9129	-4.17018
		18.3333	11484.1	19389.4	35.1414	19086.2	33.4407	-2.55182	18831.4	32.1007	-1.92287	19010.3	33.0337	-3.47383	19112.3	33.5823	-4.03064	19268	34.4451	-3.8773	19183.8	33.9746	-4.15935	18998.9	32.9734	-4.18724
		18.4	11479.8	19426.9	35.3606	19074.7	33.3787	-2.83296	18940.1	32.6637	-1.579	19085.5	33.4369	-3.28978	19165.5	33.8733	-3.95886	19256.9	34.3825	-4.15905	19117.1	33.6083	-4.74481	19080.8	33.4114	-3.96835
		18.4667	11459	19380.1	35.0872	19128.7	33.6716	-2.26665	18858.9	32.2419	-1.7273	19008.2	33.0224	-3.43083	19119.2	33.6196	-3.93907	19204.6	34.09	-4.17809	19196.7	34.0458	-4.03386	18942.1	32.6742	-4.43215
		18.5333	11481	19477.1	35.6584	19088.6	33.4538	-3.05573	18865.3	32.2748	-2.26573	19038.9	33.1865	-3.83804	19175.9	33.931	-4.19903	19236.1	34.2658	-4.57358	19191.7	34.0182	-4.63268	19004.4	33.0028	-4.67486
		18.6	11508.8	19397	35.1856	19150.6	33.7914	-2.24526	18857.7	32.2356	-1.83212	19012.4	33.0449	-3.5068	19105.8	33.5471	-4.11008	19189.3	34.0051	-4.36138	19220	34.1754	-4.00266	18998.2	32.9696	-4.23519
		18.6667	11490.5	19372.9	35.0452	19100.8	33.5198	-2.3765	18878.9	32.3449	-1.58236	18980.1	32.874	-3.5373	19147.6	33.7754	-3.74136	19183.6	33.9732	-4.2529	19151.2	33.7951	-4.24262	18946.4	32.6967	-4.36769
		18.7333	11513.1	19460.4	35.5591	19153.5	33.8074	-2.60272	18832.3	32.1057	-2.33548	19042	33.2031	-3.72208	19122.8	33.6397	-4.39093	19211.9	34.1303	-4.60966	19108.9	33.5637	-4.9879	18948.9	32.7096	-4.86867
		18.8	11461.2	19395.9	35.1792	19094.2	33.4842	-2.54614	18816.8	32.026	-2.03538	19007.7	33.0199	-3.52544	19168.1	33.8879	-3.76287	19180.3	33.9552	-4.40501	19146.9	33.7714	-4.40037	18962.2	32.7796	-4.4188
		18.8667	11443.1	19324.4	34.766	19065	33.3264	-2.29067	18771.1	31.794	-1.85413	19072.9	33.369	-2.76309	19208.8	34.1132	-3.12442	19173.1	33.9156	-4.03141	19138.4	33.7249	-4.0336	18959.5	32.7655	-4.01969
		18.9333	11462.6	19425.3	35.3514	19079.3	33.4037	-2.79876	18811.5	31.9992	-2.23424	19025.2	33.1129	-3.60456	19041.4	33.1999	-4.62303	19260.9	34.4048	-4.12747	19148.3	33.7792	-4.56472	18945.9	32.6937	-4.67683
		19	11466	19392.3	35.158	19129	33.6731	-2.33597	18846.9	32.1804	-1.85965	18966.6	32.8026	-3.7215	19146.6	33.7696	-3.86	19151.4	33.796	-4.54289	19125.5	33.6542	-4.49629	18908.8	32.5002	-4.67694
		19.0667	11491.1	19347.8	34.9003	19058	33.2888	-2.46258	18861.7	32.2564	-1.52593	19010.2	33.0332	-3.23318	19099	33.5102	-3.86163	19183.4	33.9725	-4.1087	19129.1	33.674	-4.21876	19007.3	33.0181	-3.9014
		19.1333	11451.4	19462.2	35.5697	19137.9	33.7219	-2.69887	18911.9	32.5165	-1.9353	19025.9	33.117	-3.8188	19161.9	33.8535	-4.18772	19244.9	34.3153	-4.4353	19065.3	33.3278	-5.23439	18935.9	32.6417	-4.94719
		19.2	11499.6	19402.9	35.22	19045.5	33.2215	-2.84954	18862.3	32.2594	-1.84268	19044.6	33.2166	-3.36945	19078.2	33.3974	-4.29414	19200.5	34.0671	-4.33385	19084.4	33.4312	-4.78128	18968.2	32.8108	-4.42835
		19.2667	11486.7	19459.4	35.5526	19128.9	33.673	-2.7306	18902.2	32.4657	-1.96899	19000.9	32.9838	-3.93483	19097.9	33.5041	-4.51999	19217.8	34.1635	-4.56996	19129.3	33.6751	-4.86995	18930.6	32.6137	-4.9581
		19.3333	11494.6	19374.7	35.0558	19101	33.5212	-2.38571	18818.5	32.0349	-1.90293	18943.5	32.6814	-3.74043	19157.7	33.8305	-3.69681	19246	34.3211	-3.91566	19085.8	33.4384	-4.60991	18886.1	32.3823	-4.69269
		19.4	11527.5	19405.6	35.2359	19069.5	33.3504	-2.73657	18838.3	32.136	-1.98195	18971.8	32.8298	-3.77221	19106.3	33.5495	-4.15797	19180.7	33.9575	-4.45933	19150.6	33.7914	-4.43701	18902.1	32.4652	-4.78993
		19.4667	11476.9	19443.3	35.4573	19117.3	33.6095	-2.69892	18757.2	31.7238	-2.61556	18905.4	32.4827	-4.34073	19099.5	33.5129	-4.41592	19156.2	33.8225	-4.81574	19107.4	33.5555	-4.89432	18876.2	32.331	-5.14547
		19.5333	11479.3	19379	35.081	19061.9	33.3099	-2.62209	18773.6	31.8069	-2.15617	18940.1	32.6634	-3.78363	19117.4	33.6101	-3.94243	19139.1	33.7283	-4.53357	19139.4	33.7302	-4.34328	18955.4	32.7439	-4.35624
		19.6	11484.6	19354.8	34.9409	19067.7	33.3407	-2.45125	18826.6	32.0762	-1.74684	18998.4	32.9704	-3.33659	19057.2	33.2844	-4.1281	19203.4	34.0834	-4.0384	19083.8	33.4277	-4.50568	18906.2	32.4866	-4.47349
		19.6667	11470.1	19440	35.4382	19073.5	33.372	-2.91734	18874	32.3197	-2.00059	18946	32.6945	-4.10985	19161.7	33.8527	-4.05706	19100.9	33.5204	-5.09879	19036.7	33.1748	-5.25595	18951.9	32.7256	-4.73185
		19.7333	11451.6	19432.8	35.3956	19043.3	33.2101	-3.03656	18767.6	31.7765	-2.50117	18961.9	32.7779	-3.98375	19121.1	33.6303	-4.23683	19144.3	33.757	-4.81945	19036.7	33.1745	-5.21359	18868.4	32.2909	-5.1238
		19.8	11490.2	19375	35.0577	19068.8	33.3466	-2.56211	18816.6	32.025	-1.91479	18960.5	32.7704	-3.65335	19063	33.3155	-4.21375	19233.9	34.2534	-3.98526	19118.8	33.6175	-4.43266	18899.8	32.4536	-4.62328
		19.8667	11480.2	19409	35.2557	19097.6	33.5023	-2.60443	18765.6	31.7661	-2.37164	18998.2	32.9693	-3.65245	19053.4	33.2643	-4.46292	19121.3	33.6312	-4.80541	19045.9	33.2238	-5.02437	18912.8	32.5211	-4.75373
		19.9333	11510.2	19380.9	35.0917	19016.4	33.0665	-2.87623	18758.7	31.7316	-2.24219	18965.7	32.7977	-3.66011	19061.6	33.3081	-4.25515	19176.3	33.933	-4.33959	19076.1	33.3864	-4.69777	18941.8	32.6723	-4.43859
		20	11503.1	19430.6	35.3826	19062.4	33.3126	-2.92109	18862.4	32.2598	-2.00487	18996.3	32.9596	-3.78909	19131.7	33.6881	-4.16608	19154.3	33.8119	-4.75163	19020.4	33.0876	-5.28751	18862.9	32.2626	-5.13915
		20.0667	11501	19373.1	35.0464	19019.2	33.0812	-2.8163	18823.4	32.0597	-1.86877	18901.1	32.4604	-3.95216	19093.1	33.478	-4.03995	19177.7	33.941	-4.28638	18998.7	32.9723	-5.06663	18928.3	32.6016	-4.46403
		20.1333	11511.9	19384.4	35.1121	19050.6	33.2492	-2.71392	18800.3	31.9423	-2.05189	18957.3	32.7537	-3.72451	19105.5	33.5456	-4.03807	19259.7	34.3981	-3.8949	19049.5	33.2431	-4.86148	18868.1	32.2893	-4.842
		20.2	11500.8	19366.7	35.0091	19065.4	33.3285	-2.53175	18735.2	31.6133	-2.27792	18890.1	32.4032	-3.97201	19057.4	33.2854	-4.19535	19134.5	33.7031	-4.48694	19107.8	33.5578	-4.44386	18837.9	32.1341	-4.89427
		20.2667	11421.8	19432	35.391	18989.5	32.9234	-3.31869	18822.5	32.0551	-2.21803	18957.4	32.7541	-4.00304	19035.2	33.1667	-4.6959	19183.6	33.9736	-4.59832	19082.6	33.4214	-4.96208	18887.3	32.3888	-5.02139
		20.3333	11475.9	19442.4	35.4521	19042	33.2031	-3.10012	18803.8	31.9601	-2.37411	18940	32.6632	-4.15499	19069.9	33.353	-4.57065	19063.6	33.3187	-5.31435	19017.6	33.0725	-5.37205	18821	32.0478	-5.42352
		20.4	11467.1	19434.9	35.4082	19010.5	33.0348	-3.22445	18846.6	32.179	-2.11131	18887.5	32.3896	-4.38466	19060.2	33.3008	-4.57896	19169.9	33.898	-4.69114	19005.6	33.009	-5.39163	18860.3	32.2494	-5.17797
		20.4667	11462.9	19355.9	34.947	19124.9	33.6512	-2.14681	18751.8	31.6964	-2.13261	18949.2	32.7113	-3.60174	19072.8	33.3682	-4.05031	19106.9	33.553	-4.57491	19059.5	33.2971	-4.64237	18850.5	32.1988	-4.7673
		20.5333	11483.8	19368.1	35.0174	19045.3	33.2204	-2.64808	18805.8	31.9701	-1.92944	18941.5	32.671	-3.71256	19038.6	33.1845	-4.3045	19170.1	33.899	-4.29938	19031.6	33.1471	-4.86279	18853.1	32.2124	-4.82426
		20.6	11487	19367	35.0109	18991.5	32.9342	-2.92782	18734.3	31.6087	-2.2843	18919	32.5533	-3.82376	19031.1	33.1444	-4.33809	19141.1	33.7396	-4.45231	18982.7	32.8876	-5.11585	18876	32.3302	-4.69989
		20.6667	11550.2	19321.9	34.7516	19017.7	33.073	-2.52967	18824.3	32.0646	-1.56918	18991.3	32.933	-3.18472	19033.1	33.1551	-4.06809	19095.2	33.4895	-4.4431	19005.3	33.0075	-4.73662	18913	32.5218	-4.24906
		20.7333	11507	19391.3	35.1521	19042.6	33.2061	-2.79714	18785.9	31.8689	-2.16534	18926.9	32.5944	-3.92382	19025.9	33.1171	-4.50655	19088.4	33.4526	-4.88048	19034	33.1603	-4.98429	18854.4	32.2186	-4.95269
		20.8	11441.3	19267	34.4393	19005.9	33.0107	-2.2797	18835.8	32.1236	-1.19781	18917.1	32.5432	-3.26223	19026.4	33.1195	-3.79134	19124	33.6463	-3.97396	19034	33.1601	-4.27167	18856.6	32.2301	-4.2284
		20.8667	11465.8	19369	35.0229	19045.8	33.2235	-2.65049	18813.5	32.0093	-1.8957	19011.3	33.0392	-3.34979	18968.3	32.8115	-4.68295	19115.8	33.6014	-4.60236	19032.7	33.1534	-4.86201	18829.3	32.0901	-4.95193
		20.9333	11494.4	19319.8	34.7394	19047	33.2297	-2.3608	18791.3	31.8962	-1.72531	18894.8	32.4276	-3.67787	19026.2	33.1184	-4.09258	19042.5	33.2059	-4.71445	18955.4	32.7437	-4.9882	18911.8	32.5158	-4.24284
		21	11480	19346.2	34.8911	19036.7	33.1748	-2.56743	18766.4	31.7704	-2.00284	18877.9	32.3402	-3.91702	19001.5	32.9873	-4.37541	19041.7	33.2015	-4.87051	18999.5	32.9764	-4.90722	18875.5	32.3277	-4.58261
		21.0667	11459.6	19400.5	35.2059	19049.3	33.2423	-2.81464	18803.2	31.9569	-2.13103	18873.6	32.3179	-4.2541	19003.5	32.9975	-4.67994	19048	33.2352	-5.15156	18996.6	32.9609	-5.23743	18898	32.444	-4.78103
		21.1333	11455	19383.1	35.1046	19056.2	33.2789	-2.6768	18793.6	31.9082	-2.07845	18937.7	32.6507	-3.81998	18980.7	32.8769	-4.69928	19085	33.4341	-4.85148	18988.8	32.9199	-5.17715	18831.3	32.1003	-5.02353
		21.2	11542.5	19422	35.3317	18953.8	32.7354	-3.44739	18740.1	31.6379	-2.5759	18915.3	32.5338	-4.16406	19004.1	33.0008	-4.80247	19084.1	33.4293	-5.08334	18973.8	32.8406	-5.48367	18823.1	32.0586	-5.29235
		21.2667	11505.4	19354.7	34.9403	19046.4	33.2264	-2.56492	18775.2	31.8146	-2.00776	18959.5	32.7652	-3.54123	18958.5	32.76	-4.65183	19113.5	33.5891	-4.53212	19035	33.1653	-4.76748	18806	31.9714	-4.98813
		21.3333	11479.9	19362.1	34.9829	18989.9	32.9256	-2.90834	18797	31.9256	-1.93941	18928.3	32.602	-3.74696	18959.6	32.766	-4.6884	19099.5	33.5126	-4.65117	19000.5	32.9816	-4.99381	18826.5	32.0759	-4.92621
		21.4	11512.4	19344.5	34.8813	18972.2	32.8321	-2.90023	18741.4	31.6442	-2.11921	18892.3	32.4142	-3.83314	18920.8	32.5627	-4.79012	19135.9	33.7109	-4.3513	18968.6	32.8132	-5.06057	18869.3	32.2955	-4.60493
		21.4667	11456.9	19422.5	35.3347	19038.9	33.1864	-2.99941	18732	31.5971	-2.61971	18866.3	32.2801	-4.4207	19040.8	33.1964	-4.60986	19076.5	33.3881	-5.12748	19001.6	32.9877	-5.33949	18831.3	32.1003	-5.25362
		21.5333	11472.6	19417.6	35.306	18970.5	32.8234	-3.33368	18682.9	31.3518	-2.8363	18961.5	32.7756	-3.89652	18928.8	32.6046	-5.17295	19047.2	33.231	-5.25599	19009.3	33.0286	-5.26993	18790.5	31.8925	-5.43272
		21.6	11481.9	19353.5	34.9331	18990.5	32.9289	-2.85533	18747.6	31.6755	-2.13972	18856.6	32.2303	-4.0689	18968.7	32.8137	-4.59098	19060.6	33.3029	-4.81122	18999.7	32.9777	-4.94789	18861.9	32.2575	-4.69479
		21.6667	11478	19346.8	34.8946	19081.9	33.4177	-2.32798	18787.8	31.8789	-1.89784	18876.4	32.3322	-3.92852	19013.5	33.0508	-4.31538	19090.8	33.4657	-4.60983	18948.3	32.7066	-5.18054	18786.1	31.87	-5.0438
		21.7333	11436.6	19404.2	35.2277	19013.8	33.0527	-3.02608	18764.1	31.7588	-2.35097	18896.6	32.4368	-4.15693	18992.6	32.94	-4.75922	19022.5	33.0985	-5.31005	18916	32.5377	-5.68243	18824.5	32.0654	-5.18144
		21.8	11483.5	19331.5	34.8067	19004.4	33.0023	-2.65548	18779.1	31.8344	-1.85437	18808.6	31.9843	-4.18849	18964.6	32.7922	-4.48608	19076.8	33.3902	-4.59741	18999.5	32.9765	-4.82268	18876.3	32.3316	-4.49431
		21.8667	11516.1	19386.6	35.1251	18943	32.6784	-3.29772	18848.5	32.1884	-1.81872	18958.4	32.7593	-3.73189	18952.4	32.7279	-4.86868	19028.4	33.1301	-5.17593	18981.8	32.8825	-5.23502	18830.7	32.0971	-5.04719
		21.9333	11504	19369	35.0225	18920.4	32.5608	-3.31286	18761.2	31.7439	-2.16072	18937.9	32.6521	-3.73658	19013	33.0484	-4.4457	19017.5	33.0721	-5.13133	18908.6	32.499	-5.51604	18864.3	32.2699	-4.77183
		22	11460.5	19372.5	35.0428	18964.5	32.7916	-3.10233	18745.2	31.6637	-2.26128	18860.2	32.2484	-4.16054	19013.5	33.0509	-4.46348	19044.7	33.2176	-5.00622	18993.5	32.9444	-5.0909	18809.8	31.9903	-5.07177
		22.0667	11417.7	19333.9	34.8201	18938.7	32.6563	-3.01491	18757.4	31.7251	-1.97708	18838	32.1348	-4.05137	18935.2	32.638	-4.65367	19105.6	33.5456	-4.45538	18933.1	32.6269	-5.18572	18802.8	31.9547	-4.88457
		22.1333	11447.2	19333.1	34.8157	19047.7	33.2336	-2.43323	18735.6	31.6154	-2.08244	18941.7	32.6717	-3.51012	18928.5	32.6028	-4.6845	19005	33.0058	-4.99083	18921.1	32.564	-5.24426	18768.8	31.7822	-5.05271
		22.2	11484.5	19332.3	34.8108	18991.9	32.9363	-2.72559	18743.5	31.6549	-2.03803	18890.3	32.4042	-3.77272	18948.9	32.7098	-4.57261	19032	33.1496	-4.8422	18898.7	32.4476	-5.35579	18753.2	31.704	-5.12609
		22.2667	11456.1	19293.6	34.5904	18939.7	32.6612	-2.78021	18726.7	31.5707	-1.90181	18816.6	32.0254	-3.93109	18947.8	32.7039	-4.35808	19068	33.3427	-4.42862	18918.9	32.553	-5.0299	18741.1	31.643	-4.9666
		22.3333	11436.5	19325.4	34.7713	19018.2	33.0759	-2.54643	18757.1	31.7233	-1.93008	18824.2	32.0641	-4.07324	18928.3	32.602	-4.64085	19020.5	33.0882	-4.864	18846.1	32.176	-5.58783	18776.2	31.8199	-4.9706
		22.4	11506.3	19330.1	34.7985	19009.1	33.0274	-2.62214	18832.5	32.1067	-1.5739	18884.3	32.3729	-3.79165	18991.7	32.935	-4.33501	18978	32.8629	-5.11648	18946.1	32.6949	-5.09606	18754.8	31.7119	-5.10574
		22.4667	11441.1	19403	35.2206	19055	33.2725	-2.79917	18729.5	31.5846	-2.5181	18840.1	32.1455	-4.44122	19027.5	33.1252	-4.56701	19006.1	33.0113	-5.39028	18954.1	32.737	-5.47618	18744.4	31.6593	-5.58051
		22.5333	11453.3	19402.7	35.2189	18905.4	32.4825	-3.58744	18762.8	31.752	-2.34896	18889.7	32.401	-4.18401	18924.3	32.5811	-5.10935	19003.4	32.9971	-5.40272	18936.2	32.643	-5.56836	18747.5	31.6748	-5.56325
		22.6	11447.9	19370.3	35.03	18965.2	32.7953	-3.08578	18722.3	31.5485	-2.3636	18850	32.1962	-4.19997	18926.2	32.5906	-4.911	19073.2	33.3706	-4.84033	18945	32.6893	-5.33323	18755.3	31.7145	-5.3347
		22.6667	11472.6	19376	35.0633	19002.5	32.9924	-2.92192	18736.8	31.6211	-2.32426	18894.6	32.4262	-4.00316	18991	32.9315	-4.60333	19089.9	33.4607	-4.78349	18922.9	32.5738	-5.48192	18692.2	31.3982	-5.68423
		22.7333	11492.4	19327.5	34.7838	18988.3	32.9171	-2.71783	18753.2	31.704	-1.96197	18889.4	32.3993	-3.75065	18960.3	32.7693	-4.48613	19034.7	33.1641	-4.80063	18923.8	32.5784	-5.19792	18740.2	31.6382	-5.16477
		22.8	11500.1	19348.1	34.9017	18991.2	32.9327	-2.82006	18694.7	31.4105	-2.37329	18917.5	32.5457	-3.72213	18899.6	32.4521	-4.92112	19071.6	33.3619	-4.72068	18855.8	32.2261	-5.6681	18722.9	31.5516	-5.36929
		22.8667	11447.2	19310.4	34.686	18945.2	32.6901	-2.84697	18699.6	31.4352	-2.13293	18875.8	32.329	-3.72315	18939.7	32.6614	-4.4962	19063.2	33.3166	-4.55034	18877.2	32.3363	-5.34224	18700.6	31.4402	-5.26502
		22.9333	11406.2	19347.3	34.8976	18972.6	32.8341	-2.91452	18749.4	31.6848	-2.09489	18840.8	32.149	-4.11464	18938.8	32.6566	-4.7126	18995.8	32.9567	-5.12181	18916.9	32.5425	-5.34758	18688.1	31.3779	-5.5389
		23	11506.6	19351.9	34.9236	18953.1	32.7315	-3.04318	18676.5	31.3201	-2.48556	18835	32.1191	-4.17065	18955.7	32.7454	-4.64977	19051.5	33.2539	-4.85063	18885.7	32.3803	-5.5358	18719.9	31.5365	-5.40634
		23.0667	11482.5	19410.3	35.2635	18948	32.7049	-3.40965	18759.1	31.7334	-2.41214	18813.2	32.008	-4.62158	18950	32.7151	-5.0199	18990.7	32.93	-5.51442	18889.5	32.4	-5.85597	18787	31.8747	-5.40793
		23.1333	11453.7	19345.2	34.8855	18972.5	32.8336	-2.90299	18732	31.5971	-2.17052	18839.3	32.1411	-4.11047	18946	32.6944	-4.66267	19032.4	33.1515	-4.91488	18848	32.186	-5.69204	18711.7	31.4957	-5.40897
		23.2	11496	19360.8	34.9755	19028.4	33.1305	-2.69608	18771.2	31.7947	-2.06291	18828.2	32.0842	-4.25739	18886.4	32.3841	-5.06293	19027.3	33.1244	-5.03209	18849.5	32.1937	-5.77428	18723.8	31.5558	-5.43892
		23.2667	11448.6	19335.6	34.8302	18980	32.8732	-2.80807	18647.8	31.1782	-2.53406	18823.4	32.0598	-4.13647	18953.2	32.7323	-4.56944	19009.1	33.0273	-4.98385	18800.3	31.9421	-5.88054	18767.6	31.7764	-5.07294
		23.3333	11461.8	19324.3	34.7654	19040.1	33.1929	-2.42357	18667.9	31.2777	-2.36983	18836	32.1241	-4.00736	18952.1	32.7263	-4.51067	19004.4	33.0024	-4.94394	18816	32.0222	-5.73574	18699.1	31.4327	-5.35186
		23.4	11430.6	19330.5	34.8006	19019	33.0803	-2.5714	18640.7	31.1429	-2.53979	18812.8	32.0059	-4.16086	18919.2	32.5545	-4.71773	18973.8	32.8406	-5.14095	18827.3	32.0799	-5.71323	18677.5	31.3252	-5.49464
		23.4667	11470.7	19460.1	35.5567	18960.7	32.7717	-3.63616	18690.5	31.39	-3.04889	18860.3	32.2491	-4.67372	18978.3	32.8641	-5.1642	18969.9	32.8202	-5.91744	18885.7	32.3801	-6.16918	18702.6	31.4502	-6.12574
		23.5333	11431.1	19336.8	34.837	19036	33.1706	-2.51742	18713.3	31.5033	-2.21573	18903.5	32.4727	-3.73034	18936.6	32.6453	-4.66319	18932.7	32.6247	-5.39316	18896.9	32.4385	-5.39097	18686.9	31.3718	-5.4843
		23.6	11518.7	19346.4	34.8922	18936.9	32.6465	-3.09677	18713.7	31.5053	-2.26906	18815.5	32.0198	-4.23854	18967.2	32.8055	-4.55827	19010.6	33.0354	-5.03774	18874.8	32.3241	-5.56064	18718.6	31.5301	-5.38129
		23.6667	11485.8	19336.2	34.8334	18973.7	32.8399	-2.8446	18643.6	31.1573	-2.55821	18807.5	31.979	-4.22047	18945.3	32.6906	-4.61438	18987.9	32.9149	-5.09944	18822	32.0528	-5.77313	18694.7	31.4105	-5.44208
		23.7333	11453.8	19360.7	34.9745	18949.8	32.7145	-3.11108	18684.4	31.3596	-2.49706	18801.1	31.9464	-4.39422	18888.4	32.3945	-5.05161	18967	32.8045	-5.35097	18913.4	32.5241	-5.44296	18748.5	31.6798	-5.31392
		23.8	11462.3	19378.6	35.0783	18902.4	32.4667	-3.4626	18779.7	31.8374	-2.12293	18885.9	32.3812	-4.06313	18968.1	32.8105	-4.73934	18999.6	32.9773	-5.28194	18882.1	32.3619	-5.70892	18636.9	31.1244	-5.97311
		23.8667	11451.4	19376.9	35.0686	18915.3	32.5338	-3.38595	18612.5	31.0043	-2.94646	18767.8	31.7776	-4.6571	18886.4	32.384	-5.15618	18929.3	32.6071	-5.64246	18811.5	31.9994	-6.06171	18706.3	31.4683	-5.61952
		23.9333	11480.2	19410.7	35.2656	19000.1	32.9796	-3.13717	18628.8	31.0844	-3.06338	18757	31.723	-4.90876	18942.4	32.6757	-5.06153	18983.3	32.8906	-5.55594	18808.5	31.9838	-6.27435	18665.7	31.2666	-6.01827
		24	11475.4	19385.2	35.117	18957.6	32.7555	-3.21261	18628.6	31.0837	-2.91539	18836.3	32.1259	-4.35718	18907.5	32.4936	-5.095	18958.2	32.7586	-5.53933	18866.8	32.2827	-5.82678	18683.6	31.3553	-5.78085
		24.0667	11472.3	19329.7	34.7962	19045.9	33.2236	-2.42373	18723.1	31.5523	-2.12602	18820.4	32.0448	-4.11757	18936.3	32.6436	-4.62417	18878.5	32.343	-5.63416	18840.9	32.1494	-5.63938	18639.2	31.1357	-5.67978
		24.1333	11514.7	19313.1	34.7015	19007.8	33.0205	-2.53203	18666.5	31.2707	-2.31281	18872.4	32.3113	-3.75623	19015.2	33.0597	-4.11336	18963.1	32.7841	-5.09834	18820.1	32.0432	-5.65074	18704.4	31.459	-5.26169
		24.2	11488.2	19364.5	34.9967	18986	32.9052	-2.94255	18685.9	31.3666	-2.51217	18790.2	31.8909	-4.47192	18940.9	32.6677	-4.80061	18909.3	32.5029	-5.67472	18847.3	32.1824	-5.80682	18639.3	31.1362	-5.87971
		24.2667	11542.9	19310	34.6833	19005.8	33.0097	-2.52468	18708.5	31.4797	-2.08575	18804.7	31.9643	-4.08516	18868.3	32.2903	-4.86459	18980.9	32.878	-4.98633	18836.1	32.1247	-5.55119	18623	31.0561	-5.64638
		24.3333	11454.8	19337.6	34.8417	18963.3	32.7855	-2.90732	18676	31.3178	-2.40601	18742.2	31.6484	-4.55946	18887.5	32.3896	-4.9237	18889.3	32.399	-5.62372	18820.3	32.0442	-5.79006	18695.3	31.4135	-5.44738
		24.4	11445	19376	35.0631	18913	32.5218	-3.39242	18665.8	31.2669	-2.67833	18841	32.15	-4.27919	18847.8	32.1848	-5.34991	19013.3	33.0497	-5.19429	18819.8	32.0416	-6.01398	18603.3	30.9594	-6.12287
		24.4667	11482.8	19301.4	34.6346	18967	32.8048	-2.68089	18676.7	31.321	-2.19571	18868.6	32.2917	-3.70898	18864.5	32.2709	-4.83529	18923.2	32.5753	-5.2402	18768.2	31.7792	-5.8479	18668.3	31.2796	-5.3742
		24.5333	11514.7	19380	35.0867	19030.8	33.1429	-2.79481	18694.7	31.4106	-2.55817	18780.8	31.8431	-4.60965	18884.6	32.3745	-5.18378	19011.5	33.0401	-5.22749	18823.7	32.0612	-6.01792	18656.7	31.2219	-5.88393
		24.6	11508.2	19343.2	34.8736	18971.8	32.8301	-2.89452	18692.3	31.3989	-2.35675	18818.8	32.0362	-4.20344	18889.9	32.4022	-4.94296	18938.4	32.6545	-5.40001	18836.4	32.1263	-5.73978	18579	30.8408	-6.05192
		24.6667	11484.6	19369.4	35.0251	18909.9	32.506	-3.37025	18660.4	31.2405	-2.66673	18760.2	31.739	-4.65227	18814.2	32.013	-5.48374	18922.2	32.57	-5.63603	18777.5	31.8263	-6.19128	18636.6	31.1228	-5.9215
		24.7333	11462.1	19470.2	35.617	18944.9	32.6885	-3.77959	18732.2	31.5982	-2.90096	18827.3	32.0797	-4.90345	18854.9	32.2215	-5.86708	18927.5	32.5975	-6.20051	18798.2	31.9312	-6.67832	18613.7	31.0102	-6.62602
		24.8	11448.1	19351.9	34.9237	18950.4	32.7176	-3.0572	18703.6	31.4553	-2.35055	18759.6	31.736	-4.55384	18826.1	32.0738	-5.32152	18961	32.7733	-5.33135	18823.5	32.0605	-5.85574	18643.9	31.159	-5.78386
		24.8667	11475.9	19316.7	34.7215	18972.9	32.8359	-2.73666	18669.3	31.2842	-2.31936	18802.5	31.9532	-4.13436	18860.3	32.2494	-4.94369	18965.1	32.7949	-5.10754	18748.7	31.6811	-6.03289	18594.4	30.9156	-5.82508
		24.9333	11441	19296.8	34.6081	18908.8	32.5004	-2.9588	18633.6	31.108	-2.38226	18750.6	31.6907	-4.28357	18868.5	32.2914	-4.78829	18900.7	32.4578	-5.33126	18770.2	31.7896	-5.81103	18601.4	30.95	-5.67736
		25	11463.1	19401.9	35.214	18994.9	32.9519	-3.11319	18606	30.9726	-3.12349	18772.9	31.8034	-4.77674	18987	32.9105	-4.77511	18845.3	32.1722	-6.22278	18852	32.2067	-5.99981	18645.9	31.1685	-6.0647
		25.0667	11449.8	19346.1	34.8907	19012.4	33.0448	-2.69701	18663.3	31.2546	-2.51819	18831.2	32.0998	-4.157	18941.3	32.6696	-4.69267	18951.7	32.7245	-5.34715	18812.4	32.004	-5.87921	18626	31.0707	-5.83921
		25.1333	11475.7	19355.3	34.9433	18984.7	32.8984	-2.89607	18653.1	31.2042	-2.62123	18872.8	32.3138	-3.99568	18850.5	32.1989	-5.21605	18964.6	32.792	-5.33223	18843.5	32.1626	-5.77325	18609	30.9873	-5.97522
		25.2	11461.1	19370.3	35.0302	18912.8	32.5209	-3.36043	18647	31.174	-2.73831	18751.5	31.695	-4.70131	18856.1	32.2277	-5.27404	18886.7	32.3856	-5.82556	18726.5	31.5697	-6.45301	18590.8	30.8983	-6.15107
		25.2667	11473.3	19333.2	34.8161	18944	32.6837	-2.98344	18689.3	31.384	-2.31422	18716.3	31.5183	-4.6639	18871.3	32.3061	-4.98155	18877.5	32.3377	-5.65927	18793.1	31.9057	-5.90291	18595	30.9188	-5.91642
		25.3333	11435	19415.2	35.2919	18989.6	32.9241	-3.21896	18646.1	31.1695	-3.0045	18715.1	31.5124	-5.14559	18813.5	32.0092	-5.75429	18879.7	32.3492	-6.12369	18720.5	31.5396	-6.7448	18621.6	31.0491	-6.26202
		25.4	11456.1	19364.4	34.9959	18932.6	32.6242	-3.22271	18612.7	31.0056	-2.87232	18767.7	31.777	-4.58493	18778.1	31.8293	-5.63813	18872.1	32.3098	-5.86701	18764.1	31.7585	-6.2299	18581	30.8505	-6.16453
		25.4667	11471.6	19400.1	35.2038	18966.4	32.8018	-3.25317	18702.9	31.4513	-2.63463	18686.5	31.3699	-5.20006	18862.7	32.2617	-5.41371	18877.2	32.3366	-6.04818	18763.1	31.7537	-6.44263	18568.2	30.7878	-6.43518
		25.5333	11447.5	19395	35.1738	18951.2	32.7215	-3.30335	18718.7	31.5305	-2.52541	18721	31.5422	-4.99774	18887.3	32.3888	-5.25656	18873.4	32.3167	-6.038	18758.7	31.7316	-6.43464	18619.5	31.0389	-6.15412
		25.6	11520.4	19398.6	35.1948	18913.4	32.5242	-3.52167	18663.4	31.2551	-2.82185	18766.5	31.7706	-4.79035	18891.5	32.4104	-5.25602	18911	32.5118	-5.86398	18787	31.8747	-6.31264	18638.9	31.1342	-6.07983
		25.6667	11460.6	19410.3	35.2635	18983.1	32.8897	-3.22481	18679.8	31.3363	-2.80924	18737.8	31.626	-5.00357	18866.1	32.2791	-5.45595	18887.9	32.3916	-6.05279	18762.1	31.7485	-6.50743	18574.7	30.8195	-6.46312
		25.7333	11458.3	19337.3	34.8399	18956.2	32.7479	-2.94313	18612	31.0021	-2.71994	18768.3	31.7799	-4.42613	18799.9	31.9399	-5.37161	18897.4	32.4407	-5.58013	18755.6	31.716	-6.11647	18580.7	30.8491	-6.01001
		25.8	11479.5	19350.7	34.9172	18943.1	32.6793	-3.08901	18619.9	31.0409	-2.75844	18727.5	31.5745	-4.70886	18872.6	32.3128	-5.07596	18948.4	32.7068	-5.39131	18726.6	31.5702	-6.33949	18555.5	30.7265	-6.20989
		25.8667	11444	19361.5	34.9792	19008.1	33.0222	-2.80807	18654.4	31.2109	-2.65035	18752.1	31.698	-4.6473	18795	31.9152	-5.53559	18914.5	32.5301	-5.63005	18782.7	31.8527	-6.11894	18549.2	30.6956	-6.30273
		25.9333	11447.5	19342.2	34.8678	18945	32.6892	-3.02963	18605.9	30.9721	-2.7778	18705.8	31.466	-4.76785	18812.8	32.0057	-5.33364	18820.3	32.0439	-6.00481	18727.2	31.5732	-6.28707	18517.7	30.5438	-6.34321
		26	11508.6	19347.5	34.8986	19040.4	33.1946	-2.55517	18655.5	31.216	-2.56472	18896.7	32.4373	-3.82745	18860.2	32.2486	-5.12161	18842.4	32.157	-5.92256	18715.5	31.5142	-6.3769	18576.3	30.8276	-6.09022
		26.0667	11458	19340.5	34.8585	18960.7	32.7715	-2.93801	18687.9	31.3768	-2.36375	18676.7	31.3212	-4.90333	18871.1	32.3049	-5.02508	18918.8	32.5524	-5.48696	18768.3	31.7797	-6.07123	18496.8	30.4429	-6.4347
		26.1333	11448.4	19329.9	34.7973	18900.6	32.4574	-3.19101	18623	31.0559	-2.62356	18724.4	31.5592	-4.60425	18870.4	32.3011	-4.96783	18904.1	32.4756	-5.50269	18722.8	31.5512	-6.23858	18529.1	30.5985	-6.21804
		26.2	11503.6	19371.6	35.0377	18944.4	32.686	-3.2028	18622.4	31.0528	-2.86704	18747.5	31.675	-4.72883	18805.7	31.9696	-5.53971	18875	32.3252	-5.89349	18697.3	31.4237	-6.60655	18554.5	30.7215	-6.33541
		26.2667	11482.7	19365	34.9995	18956.2	32.748	-3.10249	18651.6	31.1969	-2.68465	18742.2	31.6483	-4.71724	18829.1	32.0892	-5.38182	18873.3	32.3162	-5.86421	18700.4	31.4393	-6.55267	18554.3	30.7206	-6.29805
		26.3333	11447.3	19273.6	34.4769	18924.8	32.5835	-2.74452	18646.1	31.1699	-2.18907	18801.4	31.9478	-3.89521	18856.8	32.2311	-4.71734	18815.4	32.0193	-5.63855	18782	31.8494	-5.61996	18524.9	30.5784	-5.9177
		26.4	11448.3	19370.5	35.0312	18967.6	32.8079	-3.07439	18594.6	30.9168	-2.9965	18721.8	31.546	-4.85137	18757.9	31.7274	-5.77537	18932.3	32.6226	-5.58955	18695.1	31.4128	-6.61088	18627.4	31.0776	-5.97285
		26.4667	11495.1	19384.4	35.1121	18998.4	32.9709	-2.99223	18617.4	31.0286	-2.96554	18753.7	31.7063	-4.77182	18833.3	32.1108	-5.47287	18836.1	32.125	-6.16801	18747.9	31.6768	-6.42771	18541.3	30.6574	-6.47381
		26.5333	11464.4	19294.2	34.5933	18939.4	32.66	-2.78439	18629.1	31.0861	-2.38936	18689.8	31.3861	-4.57328	18837.2	32.1305	-4.93435	18824.4	32.0651	-5.70916	18709.4	31.484	-6.10179	18536.8	30.6359	-5.97665
		26.6	11483.6	19405.6	35.236	18954.9	32.7409	-3.34619	18571.8	30.8055	-3.31264	18708.2	31.478	-5.12407	18880.3	32.3522	-5.35536	18843.3	32.1617	-6.25523	18714.8	31.5109	-6.71755	18512.8	30.5201	-6.73506
		26.6667	11477.8	19394.9	35.1731	18986.8	32.9091	-3.11506	18605.5	30.9701	-3.08503	18750.1	31.6882	-4.851	18824.9	32.0677	-5.57696	18852.8	32.2107	-6.14329	18752.2	31.6988	-6.46677	18486	30.3912	-6.80106
		26.7333	11472.4	19304.4	34.6518	18887.5	32.3895	-3.11332	18587.9	30.8841	-2.64983	18753.8	31.707	-4.31091	18778.7	31.8327	-5.29068	18878.3	32.342	-5.49071	18729.5	31.5845	-6.05976	18503.2	30.4737	-6.19732
		26.8	11415.8	19368.8	35.0215	19026.4	33.1195	-2.75306	18692.1	31.3977	-2.50587	18737.5	31.6249	-4.76276	18825.2	32.0692	-5.42384	18781	31.8443	-6.35814	18732.1	31.5975	-6.41653	18545.8	30.6793	-6.36142
		26.8667	11465	19320.8	34.7454	18888.6	32.3955	-3.20101	18600.7	30.9468	-2.68069	18711	31.4918	-4.61973	18733.5	31.6046	-5.61234	18846.8	32.1799	-5.74644	18641	31.1445	-6.59341	18487.3	30.3973	-6.36731
		26.9333	11462	19330.9	34.8029	18852.6	32.2093	-3.44464	18633.7	31.1083	-2.57666	18653.7	31.2074	-4.96157	18761.4	31.745	-5.52948	18880.1	32.3512	-5.6326	18725	31.562	-6.2334	18482.6	30.3752	-6.44688
		27	11472.2	19378.6	35.0786	18898.1	32.4444	-3.48524	18643.9	31.1588	-2.80188	18702.9	31.4516	-4.99307	18757.3	31.7242	-5.82596	18851.7	32.2048	-6.05473	18697.8	31.4263	-6.64472	18463.4	30.283	-6.81475
		27.0667	11438.6	19362	34.9822	18923	32.5739	-3.25937	18664.4	31.2603	-2.604	18700.4	31.4393	-4.90904	18823.1	32.0586	-5.39523	18823	32.058	-6.10511	18691.1	31.3926	-6.58212	18531.6	30.6108	-6.39056
		27.1333	11459.3	19324	34.7637	18918	32.5479	-3.06691	18652.2	31.2001	-2.44573	18691.7	31.3958	-4.73404	18773.1	31.8042	-5.43104	18849.8	32.195	-5.74959	18746.7	31.6712	-6.085	18529.8	30.6018	-6.18107
		27.2	11466.1	19371.5	35.0374	18941.5	32.6708	-3.21759	18619	31.0364	-2.88302	18703.9	31.4567	-4.94677	18729.8	31.5861	-5.92283	18808.3	31.9829	-6.23534	18706.7	31.4707	-6.55916	18511.4	30.5132	-6.54337
		27.2667	11495.9	19327.5	34.7834	18910.9	32.5111	-3.12338	18570	30.797	-2.86849	18679.4	31.3343	-4.81513	18740.5	31.6397	-5.61527	18873.6	32.3177	-5.64664	18672.2	31.2986	-6.47726	18498.7	30.4522	-6.35036
		27.3333	11445.6	19338.4	34.8463	18869.1	32.2945	-3.40288	18544	30.6708	-3.05769	18734.8	31.6114	-4.60104	18736.7	31.6209	-5.69699	18756.3	31.7195	-6.30776	18630.9	31.095	-6.74384	18480	30.3627	-6.50279
		27.4	11490.1	19331.1	34.8041	18860.5	32.2501	-3.40501	18580.6	30.8486	-2.83754	18686.8	31.3711	-4.79907	18804.3	31.9623	-5.3133	18811.6	31.9995	-5.98552	18634.6	31.1132	-6.68337	18472.7	30.3277	-6.49558
		27.4667	11439.8	19356.6	34.9513	18891.2	32.4086	-3.39374	18573.9	30.8159	-3.01748	18732.6	31.6	-4.71741	18780.6	31.8423	-5.58052	18793.3	31.9065	-6.2257	18661.2	31.2442	-6.6996	18486	30.3915	-6.579
		27.5333	11462.8	19402.8	35.2193	18938.8	32.6565	-3.41389	18584	30.8651	-3.23625	18678.2	31.3286	-5.25679	18763.1	31.7537	-5.93715	18810.8	31.9958	-6.40441	18682.4	31.3493	-6.86244	18516.2	30.5362	-6.7023
		27.6	11491.9	19384	35.1096	18945.6	32.6922	-3.26848	18558.9	30.7427	-3.24902	18628.7	31.0839	-5.39188	18691.1	31.3926	-6.18864	18814.2	32.013	-6.27757	18616.6	31.0245	-7.07762	18451.9	30.2286	-6.90024
		27.6667	11457.1	19339.9	34.8548	18894.8	32.4273	-3.27857	18651.5	31.1965	-2.54042	18683.2	31.3533	-4.8676	18787.4	31.8767	-5.4497	18830.6	32.0966	-5.93918	18662.4	31.2504	-6.59688	18439.3	30.1683	-6.7057
		27.7333	11418.1	19331.9	34.8085	18903.3	32.4714	-3.18821	18564.4	30.7694	-2.92124	18661	31.2433	-4.93134	18754.3	31.7092	-5.57086	18896.3	32.4351	-5.5544	18650.2	31.1902	-6.61089	18468.4	30.3069	-6.52086
		27.8	11487.5	19325.9	34.7743	18857.1	32.2329	-3.39247	18637.8	31.1287	-2.52773	18692.3	31.3989	-4.74154	18750.6	31.6908	-5.55506	18827.4	32.0803	-5.87494	18607.2	30.9787	-6.78812	18497.5	30.4462	-6.34724
		27.8667	11434.7	19356.2	34.9485	18911.5	32.5141	-3.28551	18578.4	30.8379	-2.99272	18671.5	31.2953	-5.01934	18738.2	31.6282	-5.79188	18783.5	31.8567	-6.27279	18640.4	31.1418	-6.79922	18419.1	30.0724	-6.89531
		27.9333	11476.8	19359.5	34.9679	18909	32.501	-3.31792	18605.5	30.9702	-2.8798	18728.5	31.5796	-4.7544	18806.1	31.9715	-5.46794	18806.2	31.972	-6.17682	18608.3	30.9839	-6.97646	18452.3	30.2303	-6.75677
		28	11426.7	19291.8	34.58	18886.4	32.3838	-3.04725	18528.8	30.597	-2.86508	18738.4	31.6291	-4.31699	18798.6	31.9337	-5.11785	18827	32.0782	-5.68277	18630.4	31.0922	-6.48033	18463.6	30.284	-6.31524
		28.0667	11442.5	19324	34.7636	18878.7	32.344	-3.27071	18566.5	30.7799	-2.86589	18645.8	31.168	-4.96173	18756.7	31.7214	-5.51382	18816.3	32.0234	-5.92117	18642.4	31.1516	-6.60451	18425.3	30.1018	-6.68099
		28.1333	11473.6	19280.1	34.5134	18881.4	32.3579	-3.00665	18547.4	30.6873	-2.70824	18650.7	31.1923	-4.68719	18745.3	31.6641	-5.32088	18754.5	31.7104	-5.98401	18655.8	31.2177	-6.28823	18455.9	30.2475	-6.28515
		28.2	11482.3	19316.3	34.7196	18910.6	32.5093	-3.0613	18566.1	30.7778	-2.8239	18629.6	31.0883	-4.99736	18727.5	31.5747	-5.61643	18778.6	31.8321	-6.06838	18639.4	31.1366	-6.57548	18404.8	30.0051	-6.73364
		28.2667	11450.8	19311.9	34.6942	18916.8	32.5419	-3.00341	18505.4	30.4844	-3.09186	18695.7	31.4157	-4.64461	18803.2	31.9568	-5.20891	18707	31.472	-6.40315	18613.5	31.0093	-6.67736	18425.4	30.1026	-6.6108
		28.3333	11426.2	19333.4	34.8177	18917	32.5429	-3.12589	18562.7	30.7615	-2.93824	18704	31.457	-4.72682	18668.6	31.2811	-6.00814	18801.4	31.9478	-6.05085	18575.3	30.8225	-6.98773	18466.1	30.2959	-6.54096
		28.4	11439.4	19335	34.8266	18883.3	32.3677	-3.31001	18578.5	30.8382	-2.87047	18752	31.6977	-4.49502	18813	32.0069	-5.29126	18729.6	31.5851	-6.42244	18578.8	30.8394	-6.97967	18414.2	30.0494	-6.79645
		28.4667	11468.2	19309.2	34.6792	18848.5	32.1884	-3.3419	18596.6	30.9266	-2.63464	18708.4	31.4791	-4.56613	18717.8	31.5259	-5.62487	18828	32.0832	-5.77691	18612.9	31.0066	-6.6651	18381.4	29.8947	-6.80367
		28.5333	11426.9	19293.6	34.5899	18916.6	32.5406	-2.90029	18556.9	30.7331	-2.73886	18776.7	31.8226	-4.13331	18767.6	31.7765	-5.28494	18718	31.5268	-6.24403	18550.3	30.701	-6.8814	18382.6	29.9002	-6.70885
		28.6	11436.7	19312.4	34.6974	18857.2	32.2331	-3.31539	18561	30.7531	-2.82641	18686.3	31.369	-4.6945	18716	31.5172	-5.65185	18768.7	31.7819	-6.09643	18589.4	30.8913	-6.79868	18443.8	30.1901	-6.52658
		28.6667	11437.9	19344.7	34.8825	18897.1	32.4394	-3.29413	18550.7	30.703	-3.06152	18598.6	30.9364	-5.31217	18746.5	31.67	-5.68408	18799.8	31.9394	-6.12402	18575.2	30.8222	-7.05274	18472.2	30.3251	-6.5765
		28.7333	11433.6	19309.4	34.68	18827.6	32.0811	-3.44999	18485.1	30.387	-3.17518	18645.9	31.1688	-4.87737	18725.5	31.5643	-5.58732	18761.8	31.7468	-6.11414	18544.1	30.6711	-7.00142	18439.4	30.1689	-6.53033
		28.8	11435.4	19314.6	34.7096	18874.2	32.321	-3.23964	18594.4	30.9157	-2.67601	18703.1	31.4525	-4.62317	18749.8	31.6868	-5.4943	18769.3	31.7849	-6.10557	18613.8	31.011	-6.69109	18379.3	29.885	-6.84376
		28.8667	11488.1	19380.1	35.0873	18864.4	32.2705	-3.66787	18544.3	30.6719	-3.29752	18682.5	31.3497	-5.10368	18776.7	31.8224	-5.73651	18754.1	31.7085	-6.55977	18670.7	31.2914	-6.78836	18486.7	30.3948	-6.7117
		28.9333	11459.8	19346.4	34.8923	18845.5	32.1731	-3.57032	18547	30.6854	-3.08904	18625.3	31.0673	-5.1911	18694.1	31.4078	-5.95602	18784.5	31.8619	-6.21132	18592.4	30.906	-6.97875	18385.7	29.915	-6.99652
		29	11483.3	19304.5	34.6522	18795.9	31.9199	-3.58336	18518.6	30.5479	-2.98634	18650	31.1888	-4.82945	18655.2	31.2149	-5.90886	18749	31.6824	-6.15072	18522.5	30.5668	-7.07791	18433.2	30.1393	-6.5321
		29.0667	11483.3	19333.9	34.8202	18797.4	31.9272	-3.74411	18565.3	30.774	-2.9283	18609.1	30.9879	-5.19845	18738.5	31.6297	-5.66213	18744.6	31.6605	-6.3407	18576.6	30.8292	-6.98356	18366.9	29.8264	-7.01304
		29.1333	11472.9	19342.8	34.8714	18840.5	32.1475	-3.57502	18561.7	30.7565	-2.99703	18670.3	31.2896	-4.9479	18649.5	31.1865	-6.15646	18728.2	31.578	-6.47433	18608.7	30.9857	-6.87821	18346.8	29.7324	-7.15825
		29.2	11474.6	19384.8	35.1142	18892.6	32.416	-3.54936	18477.5	30.3508	-3.64554	18574.2	30.8171	-5.66321	18695.9	31.4169	-6.16894	18761.9	31.7475	-6.54768	18555.6	30.7266	-7.3801	18403.3	29.9982	-7.13526
		29.2667	11455.2	19308.7	34.676	18843.3	32.162	-3.36501	18507.6	30.495	-3.06306	18600.9	30.9475	-5.09457	18724.9	31.5614	-5.58619	18719.3	31.5333	-6.32357	18620.2	31.0423	-6.62621	18390.9	29.9396	-6.75555
		29.3333	11468.4	19367.5	35.0143	18870.3	32.3008	-3.56455	18514.7	30.5292	-3.36723	18614.1	31.0122	-5.3682	18725.7	31.5657	-5.92013	18755	31.7126	-6.48265	18597.7	30.932	-7.07476	18344.6	29.7222	-7.31129
		29.4	11462.6	19318.6	34.7329	18816.6	32.0253	-3.55872	18493.4	30.4269	-3.18806	18577.5	30.8335	-5.26547	18724.3	31.5584	-5.64611	18767.7	31.7767	-6.13713	18539.3	30.648	-7.07739	18430.9	30.1288	-6.62329
		29.4667	11480.7	19329.1	34.7928	18822	32.0525	-3.5914	18485.4	30.3884	-3.28649	18625.7	31.0691	-5.08985	18657	31.2236	-6.04083	18756.7	31.7215	-6.25225	18491.5	30.4175	-7.36788	18349.3	29.744	-7.06804
		29.5333	11459.4	19300.1	34.6273	18950	32.7156	-2.7628	18466.9	30.2999	-3.20952	18565.1	30.7731	-5.22033	18700.3	31.4385	-5.66038	18685.2	31.3634	-6.44482	18547.3	30.6868	-6.93301	18389.7	29.9336	-6.71288
		29.6	11412.7	19287.6	34.5559	18791.7	31.8984	-3.5086	18483.3	30.3784	-3.05957	18617.2	31.0276	-4.89435	18732	31.5972	-5.43022	18702.1	31.4476	-6.28917	18520.5	30.5573	-6.99109	18362.8	29.8075	-6.76757
		29.6667	11449.8	19303.1	34.6444	18797.5	31.928	-3.5675	18579.6	30.8437	-2.68282	18654.8	31.2126	-4.79788	18729.3	31.5836	-5.53241	18741.2	31.6434	-6.18198	18498.4	30.4505	-7.18636	18373.9	29.8594	-6.80422
		29.7333	11439.8	19371.3	35.036	18833.4	32.1111	-3.77597	18523	30.5691	-3.34895	18575.8	30.8251	-5.57698	18614.5	31.0144	-6.49312	18721	31.542	-6.67487	18613.5	31.0093	-7.01921	18369.6	29.8391	-7.21609
		29.8	11465.3	19348.4	34.9039	18808.3	31.9831	-3.77185	18554.9	30.7237	-3.06231	18630	31.0904	-5.17958	18726.5	31.5693	-5.80612	18654.4	31.2105	-6.87426	18540.3	30.6527	-7.24362	18377.1	29.8744	-7.04868
		29.8667	11441.1	19316.2	34.7191	18832.5	32.1062	-3.464	18479.7	30.361	-3.24028	18562	30.758	-5.32727	18706.6	31.4701	-5.72058	18720.2	31.5382	-6.36185	18592.5	30.9063	-6.8053	18360.5	29.7964	-6.94195
		29.9333	11466.3	19343.7	34.8769	18850.2	32.1972	-3.53079	18554	30.7191	-3.03984	18535.5	30.6294	-5.61358	18655.3	31.2151	-6.13329	18733.1	31.6025	-6.45532	18526	30.5837	-7.28563	18390	29.9353	-6.96077
		30	11482.7	19331.9	34.8087	18808.8	31.9855	-3.67436	18544.4	30.6724	-3.01846	18669.1	31.2835	-4.89132	18672.4	31.3	-5.98032	18663.1	31.2538	-6.73591	18532.1	30.6133	-7.18794	18348.8	29.7417	-7.08625
		30.0667	11463.4	19357.4	34.9555	18811.3	31.9981	-3.80853	18499.8	30.4573	-3.38033	18603	30.958	-5.36356	18680.1	31.3379	-6.08917	18690.2	31.3881	-6.74835	18530.6	30.6057	-7.34228	18383.2	29.9032	-7.07151
		30.1333	11466.1	19289.9	34.5689	18824.3	32.0644	-3.35556	18502.3	30.4695	-2.98145	18588.4	30.8863	-5.04867	18661.5	31.2459	-5.79451	18765.8	31.7671	-5.98268	18547.6	30.6882	-6.87318	18352.2	29.7579	-6.83014
		30.2	11447.8	19342	34.8667	18855	32.2218	-3.49593	18464	30.2863	-3.46252	18602.3	30.9543	-5.27853	18599.9	30.9425	-6.39577	18711.2	31.4929	-6.55467	18486.9	30.3957	-7.46353	18359.7	29.7929	-7.09296
		30.2667	11429.9	19320.5	34.7436	18878.1	32.341	-3.2537	18496.2	30.4404	-3.18529	18630.6	31.0931	-5.01662	18641.3	31.146	-6.0692	18692.4	31.399	-6.52552	18506.5	30.4895	-7.24662	18427	30.1102	-6.65257
		30.3333	11465.4	19260.7	34.404	18792.3	31.9017	-3.35338	18433.9	30.1428	-3.14326	18651	31.1937	-4.57639	18711.8	31.4961	-5.3795	18728.8	31.5809	-6.00406	18494.2	30.4305	-6.96597	18390.4	29.9372	-6.48604
		30.4	11455.1	19289	34.564	18798.7	31.9341	-3.48095	18489.6	30.4087	-3.03734	18616.7	31.0249	-4.90516	18666	31.2683	-5.76725	18702	31.4469	-6.29798	18508.1	30.4976	-7.05889	18380.8	29.8919	-6.69121
		30.4667	11463	19313.7	34.7046	18768	31.7786	-3.77706	18436.8	30.1566	-3.43012	18621.5	31.0485	-5.02225	18668.1	31.2785	-5.89768	18689	31.3822	-6.5033	18510.5	30.5092	-7.18793	18354.8	29.7697	-6.95406
		30.5333	11431.2	19299.7	34.6251	18817.2	32.0285	-3.44764	18490.8	30.4145	-3.09266	18522.8	30.568	-5.4232	18608.1	30.9829	-6.11371	18621.8	31.0501	-6.75594	18502.5	30.4705	-7.14703	18253.5	29.2995	-7.34476
		30.6	11429.2	19319.9	34.7402	18881	32.3561	-3.23513	18497.3	30.4455	-3.17675	18587.8	30.8836	-5.22269	18646.7	31.1727	-6.03903	18665.3	31.2647	-6.65638	18520.7	30.5581	-7.17457	18323.6	29.6244	-7.13498
		30.6667	11418.3	19357	34.9531	18800.7	31.9444	-3.85974	18470.7	30.3183	-3.51688	18643.8	31.1584	-5.16076	18643.7	31.1579	-6.26677	18694.4	31.409	-6.72505	18560.1	30.7487	-7.19686	18304.2	29.5339	-7.43836
		30.7333	11415.1	19319.3	34.7364	18777.8	31.8278	-3.75977	18517.5	30.5427	-3.07581	18557.5	30.7363	-5.36629	18641.5	31.1469	-6.0611	18674.6	31.3106	-6.60674	18588.9	30.8887	-6.8402	18301.2	29.5199	-7.23573
		30.8	11460.1	19302.9	34.6433	18782.7	31.8528	-3.64156	18524.6	30.577	-2.94835	18565.9	30.777	-5.23239	18566.5	30.78	-6.33479	18682.2	31.3485	-6.47566	18487.3	30.3976	-7.23815	18235	29.2147	-7.44779
		30.8667	11453.4	19378.1	35.0755	18815.1	32.0178	-3.90885	18525.7	30.5823	-3.37537	18528.1	30.5939	-5.84769	18649.9	31.1883	-6.35883	18695.1	31.4128	-6.8437	18578.1	30.8361	-7.23193	18285.6	29.4477	-7.64702
		30.9333	11455.4	19362.5	34.9849	18841.8	32.154	-3.68199	18470.1	30.3152	-3.55174	18555.9	30.7283	-5.62263	18708.5	31.4796	-5.97684	18695.5	31.4147	-6.75116	18524.1	30.5746	-7.40274	18317.6	29.5962	-7.40784
		31	11433.1	19320.8	34.745	18747.7	31.6762	-3.91983	18464.7	30.2893	-3.33775	18541	30.6562	-5.45489	18624.2	31.0618	-6.15479	18640.7	31.1429	-6.78303	18574.2	30.8171	-6.92037	18259.9	29.3291	-7.43503
		31.0667	11411.6	19281.8	34.5232	18789.2	31.8859	-3.4884	18533.6	30.6203	-2.78497	18571.7	30.8052	-5.08415	18579.2	30.8416	-6.15318	18685.1	31.3627	-6.3414	18426.9	30.1096	-7.40616	18302.4	29.5255	-7.01688
		31.1333	11462.4	19357.3	34.9553	18836.8	32.1284	-3.67794	18445.6	30.1985	-3.63884	18585.5	30.8726	-5.44878	18625.5	31.0681	-6.35869	18677.6	31.3255	-6.81074	18505.3	30.484	-7.46378	18256	29.3109	-7.66356
		31.2	11450.6	19351.8	34.9234	18819	32.0374	-3.73707	18448.3	30.2113	-3.59417	18561.5	30.7555	-5.534	18614	31.0116	-6.38342	18690.5	31.3898	-6.71457	18475.5	30.3412	-7.57467	18329.7	29.6524	-7.29021
		31.2667	11423.3	19399.7	35.2013	18812.5	32.0045	-4.04787	18444.6	30.1935	-3.88988	18567.1	30.7827	-5.78468	18591.4	30.9013	-6.77155	18638.2	31.1308	-7.25143	18479.2	30.3588	-7.835	18311.2	29.5665	-7.65397
		31.3333	11416.6	19319.7	34.7387	18796.1	31.9209	-3.66884	18463.5	30.2835	-3.33729	18524.9	30.5785	-5.5263	18626	31.0708	-6.13948	18638	31.1297	-6.78995	18481.1	30.3679	-7.36331	18243.5	29.2533	-7.50454
		31.4	11465	19300.4	34.6285	18758.1	31.7282	-3.75141	18486	30.3915	-3.11911	18549.4	30.6967	-5.29794	18593.6	30.9119	-6.18816	18688.8	31.3811	-6.42832	18490.3	30.4118	-7.20926	18262.7	29.3421	-7.30557
		31.4667	11421.5	19297.9	34.6145	18789.3	31.8864	-3.57918	18480.1	30.363	-3.13367	18552.4	30.7115	-5.26913	18604.1	30.9634	-6.12269	18636.6	31.1231	-6.67236	18437	30.1574	-7.44968	18278	29.4127	-7.22098
		31.5333	11463.7	19358.4	34.9615	18781.2	31.8453	-3.96724	18447.9	30.2093	-3.63434	18556.8	30.7325	-5.59509	18606.8	30.9766	-6.45646	18674.3	31.3095	-6.83296	18525.1	30.5794	-7.37457	18266.9	29.3613	-7.61938
		31.6	11449.4	19348.6	34.905	18808	31.9816	-3.77449	18432.5	30.1362	-3.65084	18555.6	30.7269	-5.54414	18560.6	30.7511	-6.62543	18605.7	30.9712	-7.11473	18479.3	30.3594	-7.5381	18272.1	29.3853	-7.53886
		31.6667	11451.2	19319.5	34.7378	18765.1	31.7636	-3.82528	18429.9	30.1236	-3.4963	18538.6	30.6443	-5.45962	18601.9	30.9523	-6.25714	18618.3	31.0328	-6.88597	18379.4	29.8851	-7.84525	18260.5	29.3319	-7.42517
		31.7333	11420.1	19300.2	34.6277	18756.7	31.7215	-3.75735	18421.2	30.0826	-3.42721	18555.3	30.7256	-5.26818	18672.5	31.3002	-5.79906	18591.7	30.9025	-6.90614	18452.8	30.2326	-7.38758	18217.9	29.1361	-7.51081
		31.8	11468.8	19341.2	34.8625	18793.9	31.9095	-3.80402	18408.3	30.0218	-3.7228	18584.2	30.8659	-5.36268	18684.4	31.3592	-5.97488	18676.1	31.3181	-6.72529	18479.7	30.3613	-7.49369	18270.5	29.3781	-7.50358
		31.8667	11408.3	19304.6	34.6526	18756.9	31.7221	-3.78151	18420.4	30.0786	-3.45604	18551.2	30.7057	-5.31298	18623.7	31.0595	-6.06462	18578.7	30.8391	-6.99436	18482.8	30.376	-7.26905	18225	29.1687	-7.50305
		31.9333	11449.7	19264.1	34.423	18769.5	31.7859	-3.48825	18395.1	29.9592	-3.34594	18506.7	30.4909	-5.29825	18643.2	31.1555	-5.73905	18619.9	31.0409	-6.56301	18454.4	30.2403	-7.1752	18290.3	29.4695	-6.97273
		32	11412.4	19289.2	34.5651	18796.3	31.9218	-3.49443	18365.2	29.8187	-3.62858	18505	30.4826	-5.44859	18567.5	30.7847	-6.25197	18625.9	31.0703	-6.67572	18456.8	30.2515	-7.30613	18227.7	29.1811	-7.40317
		32.0667	11439.4	19322.2	34.753	18783.8	31.8586	-3.74548	18424.2	30.0968	-3.53832	18531.2	30.6088	-5.51034	18591.6	30.9023	-6.32224	18677	31.3227	-6.61119	18411.6	30.0373	-7.7082	18217.3	29.1333	-7.63886
		32.1333	11436.7	19331	34.8038	18778.1	31.8296	-3.82528	18428.4	30.1169	-3.56906	18588.7	30.8881	-5.28183	18619.8	31.0404	-6.23497	18618.9	31.0361	-6.94869	18482.7	30.3756	-7.42072	18205	29.0771	-7.74594
		32.2	11454.8	19300.3	34.6285	18734.8	31.6112	-3.86833	18485.6	30.3894	-3.12116	18633.2	31.1062	-4.88835	18569.6	30.795	-6.30504	18566.6	30.7803	-7.02908	18461.7	30.2752	-7.34575	18176.7	28.9481	-7.69961
		32.2667	11421.7	19288	34.5582	18748.6	31.6806	-3.72861	18433.4	30.1406	-3.29961	18576.4	30.8282	-5.09606	18597.3	30.9302	-6.09949	18579.6	30.8435	-6.8956	18418.6	30.0705	-7.48018	18180.4	28.9651	-7.61228
		32.3333	11432	19324.7	34.7676	18764.5	31.7607	-3.85803	18455.7	30.2463	-3.40344	18486.9	30.3955	-5.73821	18560.1	30.7487	-6.4905	18582.1	30.8558	-7.09274	18482.3	30.3738	-7.38633	18282.2	29.4318	-7.35497
		32.4	11466.5	19335.3	34.8285	18799.3	31.9369	-3.74265	18429.6	30.1226	-3.588	18547.2	30.6863	-5.5083	18648.9	31.1836	-6.11645	18552.4	30.7112	-7.29817	18448.8	30.2134	-7.60755	18295.8	29.495	-7.35267
		32.4667	11476.4	19384.8	35.1144	18721.3	31.5434	-4.42215	18482	30.372	-3.62453	18507.4	30.4941	-5.98645	18548	30.69	-6.89595	18576.4	30.828	-7.46731	18492.7	30.4233	-7.68357	18212	29.109	-8.02463
		32.5333	11483.2	19291.3	34.5771	18791.2	31.8957	-3.53254	18415.4	30.055	-3.40421	18494.9	30.4337	-5.50949	18632.6	31.1032	-5.94547	18576.5	30.8284	-6.9297	18407.8	30.0194	-7.55021	18213.3	29.1151	-7.48121
		32.6	11472.1	19322.2	34.7532	18759.6	31.736	-3.86827	18386.9	29.9207	-3.71458	18557	30.7338	-5.38551	18603.1	30.9582	-6.26654	18602.9	30.9572	-6.97694	18434.8	30.1471	-7.59861	18196.4	29.0379	-7.73444
		32.6667	11461.7	19285.1	34.5418	18758.2	31.7288	-3.6641	18386.1	29.9169	-3.50703	18491.4	30.4173	-5.49066	18583.3	30.8618	-6.15162	18594.8	30.9178	-6.80497	18357.6	29.7828	-7.7515	18257.5	29.3182	-7.24283
		32.7333	11465.9	19332.1	34.8099	18772.7	31.8024	-3.85859	18464.2	30.2872	-3.40477	18526.4	30.5855	-5.59049	18543.2	30.6668	-6.61465	18599.3	30.9398	-7.05097	18438.1	30.1628	-7.63955	18234.8	29.2137	-7.61534
		32.8	11426	19374.3	35.0534	18708.5	31.4793	-4.42513	18426.2	30.1063	-3.82921	18515.5	30.533	-5.88648	18552.7	30.713	-6.81195	18603.4	30.96	-7.27434	18469	30.31	-7.73583	18193.4	29.0241	-8.04847
		32.8667	11445.6	19274.3	34.4806	18755.1	31.7133	-3.61835	18375.5	29.8667	-3.49594	18580.5	30.8482	-4.99851	18592.6	30.9068	-6.04534	18616.7	31.0252	-6.63627	18404.8	30.0051	-7.46803	18191.6	29.016	-7.48373
		32.9333	11482.8	19343.1	34.8732	18800.1	31.9411	-3.78318	18417.9	30.0669	-3.68844	18534.9	30.6266	-5.6127	18526.9	30.5878	-6.75695	18549.8	30.6989	-7.35524	18390.6	29.938	-7.92774	18204.3	29.0739	-7.81849
		33	11434.9	19350.6	34.9166	18804.1	31.9616	-3.80605	18391.4	29.9417	-3.85699	18498.2	30.45	-5.83269	18604.4	30.9645	-6.42362	18600.9	30.9478	-7.14972	18455.2	30.2441	-7.66496	18208.5	29.093	-7.84274
		33.0667	11439.1	19309.3	34.6795	18801.6	31.9489	-3.5817	18407.1	30.016	-3.54564	18534.3	30.6236	-5.42207	18565	30.7726	-6.37845	18630.7	31.0939	-6.7666	18398.4	29.9749	-7.6971	18175.2	28.9415	-7.7572
		33.1333	11468.7	19294	34.5922	18743.7	31.6557	-3.78759	18406.8	30.0144	-3.45984	18519.2	30.5508	-5.40744	18547.9	30.6897	-6.3741	18609.8	30.9911	-6.78199	18390.9	29.9392	-7.64547	18189.4	29.0062	-7.60521
		33.2	11488.5	19287.2	34.554	18770.7	31.792	-3.61309	18398.7	29.9761	-3.45997	18500.5	30.4609	-5.4592	18549.7	30.6982	-6.32741	18586.8	30.8785	-6.85641	18427.8	30.1138	-7.43264	18196.1	29.0367	-7.53648
		33.2667	11426.1	19324.8	34.7682	18707.3	31.4735	-4.14577	18438.1	30.1629	-3.48737	18609.5	30.9898	-5.14452	18521.2	30.5606	-6.67922	18592.1	30.9047	-7.04441	18382.8	29.9012	-7.85952	18134.2	28.7557	-8.03166
		33.3333	11481.7	19306.8	34.6655	18757.5	31.7256	-3.79091	18452.5	30.2315	-3.31609	18570.2	30.7978	-5.23382	18634	31.1102	-6.02685	18546.8	30.6842	-7.16217	18362.8	29.8073	-7.85068	18189.6	29.007	-7.67765
		33.4	11452.5	19292.5	34.5838	18714.6	31.5098	-3.92511	18415.2	30.0543	-3.41164	18438.7	30.1657	-5.78425	18575.2	30.8223	-6.23316	18533.2	30.6186	-7.14622	18409.9	30.0292	-7.5471	18173.3	28.9326	-7.67042
		33.4667	11441.5	19302	34.6377	18809.5	31.9892	-3.49962	18419.7	30.0756	-3.44422	18523.7	30.5727	-5.4311	18530.4	30.6049	-6.50433	18570.4	30.7988	-7.01982	18414.9	30.0527	-7.57746	18188.2	29.0005	-7.65641
		33.5333	11447.5	19322	34.752	18697.4	31.4241	-4.17895	18339.8	29.6998	-3.93429	18461.2	30.2727	-5.84534	18536.7	30.6354	-6.58811	18510.5	30.5089	-7.424	18389.6	29.9333	-7.81122	18161.1	28.8773	-7.89383
		33.6	11458.5	19334.8	34.8255	18765.5	31.7658	-3.91073	18361.5	29.8013	-3.90625	18452.1	30.2295	-5.96202	18607.4	30.9795	-6.31754	18525.5	30.581	-7.42537	18361.5	29.8013	-8.01664	18194.5	29.0293	-7.81539
		33.6667	11422.2	19321.3	34.7481	18732.4	31.5992	-4	18422.5	30.0887	-3.54146	18508.8	30.5008	-5.61334	18601.2	30.9491	-6.27057	18582.8	30.859	-7.07002	18354.8	29.7697	-7.97086	18103.7	28.6184	-8.14887
		33.7333	11481.2	19341.9	34.8662	18745.8	31.6663	-4.05101	18368.1	29.832	-3.9163	18459.5	30.2647	-5.96764	18497.1	30.4446	-6.89318	18612.7	31.0053	-7.04186	18472.7	30.3277	-7.53105	18177.1	28.9498	-7.93563
		33.8	11486.8	19294.9	34.5977	18734.2	31.6079	-3.84084	18395.8	29.9623	-3.51744	18443.7	30.1896	-5.77422	18571.8	30.8055	-6.26376	18567.6	30.7852	-6.99339	18369.3	29.8377	-7.75244	18106.9	28.6328	-7.98404
		33.8667	11453.7	19251.5	34.3524	18744	31.6574	-3.54607	18344.7	29.7225	-3.51195	18484.1	30.3822	-5.33622	18545.3	30.677	-6.14692	18599.7	30.9419	-6.59141	18360.8	29.7979	-7.54699	18194.3	29.0284	-7.3431
		33.9333	11465.2	19308.7	34.6759	18729.4	31.5842	-3.94279	18401.3	29.9886	-3.5694	18484.7	30.3852	-5.65677	18582.3	30.8567	-6.2907	18609.7	30.9905	-6.86628	18386.2	29.9172	-7.75111	18168.5	28.9108	-7.78422
		34	11461.6	19333.2	34.8161	18712	31.4972	-4.16999	18410.4	30.0317	-3.66649	18562.2	30.7591	-5.42305	18559.9	30.7476	-6.54003	18589.9	30.8937	-7.10331	18335.6	29.6802	-8.12835	18185.8	28.9897	-7.84559
		34.0667	11488.7	19335	34.8263	18750.3	31.689	-3.98843	18397.6	29.9711	-3.73735	18466.2	30.2967	-5.89576	18576.2	30.8272	-6.47071	18512.7	30.5194	-7.4879	18363.2	29.8092	-8.0096	18159.7	28.8712	-7.97435
		34.1333	11501.2	19349.4	34.9096	18741.1	31.643	-4.11763	18353.3	29.7629	-4.0288	18465.8	30.2949	-5.98076	18529.6	30.6012	-6.77997	18508.4	30.499	-7.59148	18340.8	29.7046	-8.19745	18097.3	28.5897	-8.33908
		34.2	11450.6	19243.1	34.305	18726.1	31.5674	-3.58865	18393.8	29.9533	-3.23382	18495.8	30.4382	-5.23287	18470.3	30.3161	-6.46049	18545.8	30.6796	-6.80637	18336.6	29.6848	-7.61275	18134.8	28.7582	-7.56604
		34.2667	11471.9	19273.4	34.4758	18807.9	31.981	-3.3459	18350.9	29.7514	-3.60648	18505	30.4826	-5.35934	18527	30.5882	-6.35914	18505.8	30.4865	-7.17027	18380.2	29.8892	-7.57914	18096.9	28.5875	-7.90745
		34.3333	11453.7	19279.5	34.5102	18750.6	31.6908	-3.67049	18401.6	29.9899	-3.40238	18519.6	30.5528	-5.32348	18648.4	31.1809	-5.80083	18501.7	30.4667	-7.22439	18348.1	29.7387	-7.76403	18112.4	28.6575	-7.87192
		34.4	11451.1	19318	34.729	18738.4	31.6295	-3.95059	18415.2	30.0542	-3.55686	18487.2	30.3968	-5.69827	18467.5	30.3029	-6.8977	18541.2	30.6568	-7.25309	18395.8	29.9627	-7.75885	18137.7	28.7714	-7.97678
		34.4667	11488.3	19311.8	34.6939	18699.5	31.4344	-4.11059	18434.6	30.1461	-3.42982	18431.8	30.1328	-5.92718	18550.8	30.7038	-6.46161	18479	30.3577	-7.51712	18374	29.8598	-7.82661	18192.9	29.0221	-7.691
		34.5333	11467.6	19280.5	34.5157	18728.7	31.5805	-3.78629	18407.3	30.017	-3.38081	18480	30.3626	-5.51924	18543.3	30.6671	-6.32012	18561.5	30.7556	-6.94098	18306.6	29.545	-7.96318	18098.4	28.5944	-7.94046
		34.6	11458.5	19309.9	34.683	18694.9	31.4116	-4.1225	18333.4	29.67	-3.89519	18478.8	30.3566	-5.69254	18545	30.6754	-6.47922	18555.9	30.7282	-7.13574	18246.7	29.2684	-8.40711	18103.4	28.6171	-8.08515
		34.6667	11519.8	19348	34.9014	18749.8	31.6863	-4.06611	18367.9	29.8311	-3.95239	18502.2	30.4689	-5.79858	18523.3	30.5704	-6.80251	18508.8	30.5007	-7.58156	18357.5	29.7827	-8.11118	18095.6	28.582	-8.33856
		34.7333	11436.5	19317.1	34.724	18685.3	31.3639	-4.21116	18393.3	29.9508	-3.65524	18440.6	30.1746	-5.91545	18535.2	30.6279	-6.56761	18542.2	30.6618	-7.24311	18402	29.992	-7.72446	18062	28.4315	-8.31161
		34.8	11458.2	19319.2	34.7361	18766.4	31.7703	-3.81693	18370	29.8409	-3.77731	18475.7	30.3422	-5.76004	18499.7	30.4568	-6.75093	18542	30.661	-7.25606	18275.5	29.4009	-8.32778	18107.5	28.6355	-8.11983
		34.8667	11485.2	19274.7	34.4831	18755.3	31.7143	-3.61986	18338.9	29.6954	-3.66982	18498.7	30.452	-5.39722	18465.4	30.2929	-6.66176	18521.5	30.5618	-7.10223	18299.5	29.5123	-7.96329	18110.7	28.6499	-7.85238
		34.9333	11466.2	19324.4	34.7657	18686.5	31.3698	-4.24695	18377.4	29.8759	-3.77192	18440.2	30.1729	-5.95895	18566.4	30.7792	-6.45804	18532.7	30.6159	-7.33077	18320.5	29.6097	-8.14851	18079.5	28.5099	-8.27501
		35	11470.4	19263.3	34.4188	18754.6	31.7107	-3.55911	18316.5	29.5912	-3.70967	18445.9	30.2001	-5.58481	18520.5	30.5571	-6.33325	18523.9	30.5735	-7.02623	18302.1	29.5242	-7.88703	18036.6	28.3184	-8.11957
		35.0667	11445	19342.2	34.8679	18737.9	31.6265	-4.09247	18345	29.7239	-4.02609	18467.7	30.3039	-5.93009	18485.2	30.3874	-6.95209	18443.9	30.1903	-7.85852	18432.9	30.1381	-7.72233	18027.3	28.277	-8.61009
		35.1333	11447.3	19279	34.5076	18797.9	31.9301	-3.42858	18320.5	29.6097	-3.78002	18456.3	30.2493	-5.62436	18473.2	30.3301	-6.64901	18452.2	30.2298	-7.45868	18302.6	29.5267	-7.97335	18067	28.4536	-8.07314
		35.2	11469.7	19317.9	34.7285	18722.4	31.5492	-4.03039	18345.8	29.728	-3.88265	18460.6	30.2701	-5.82455	18490.2	30.4114	-6.78873	18566.3	30.7788	-7.13062	18326.6	29.638	-8.08299	18056.5	28.4067	-8.34098
		35.2667	11482.1	19341	34.8608	18737.1	31.623	-4.08896	18363.5	29.8107	-3.93222	18412.7	30.0423	-6.1846	18485.2	30.3876	-6.94481	18496.5	30.4417	-7.60003	18321.2	29.6129	-8.24045	18088.9	28.5516	-8.32838
		35.3333	11532.2	19319.6	34.7381	18735.7	31.6157	-3.97348	18378.4	29.8807	-3.73953	18439.1	30.1674	-5.93683	18447.4	30.207	-7.00272	18471.8	30.3231	-7.59597	18338.6	29.6941	-8.03656	18054.8	28.3992	-8.35816
		35.4	11411.2	19345.7	34.8883	18699.7	31.4355	-4.30392	18298	29.5052	-4.26526	18429.5	30.122	-6.1324	18480.3	30.3642	-6.99567	18481.1	30.3676	-7.70167	18263	29.3434	-8.53748	18025.9	28.2708	-8.6367
		35.4667	11479	19272.2	34.4689	18691.8	31.3963	-3.92365	18354.8	29.7701	-3.58089	18469.3	30.3114	-5.52357	18461.1	30.2723	-6.66811	18473.1	30.3298	-7.32004	18346.7	29.7321	-7.72927	18054.4	28.3978	-8.09029
		35.5333	11445.4	19287.1	34.5534	18728.4	31.5792	-3.82528	18327.2	29.641	-3.79457	18463.2	30.2822	-5.63731	18442	30.1812	-6.84378	18473.9	30.3333	-7.4011	18231.1	29.1968	-8.34916	18034.3	28.308	-8.26459
		35.6	11474.9	19310.8	34.688	18670.9	31.2924	-4.24667	18364	29.813	-3.75713	18445.2	30.1965	-5.8576	18510.4	30.5083	-6.65131	18537.5	30.6393	-7.22965	18343.7	29.718	-7.96248	18035.6	28.314	-8.3932
		35.6667	11472	19330.9	34.8028	18667.1	31.2733	-4.38057	18291.4	29.4747	-4.21026	18501.2	30.4643	-5.70461	18480.8	30.3665	-6.90788	18448.1	30.2102	-7.77351	18246.8	29.2686	-8.52672	18039.6	28.3317	-8.49029
		35.7333	11439.2	19286.3	34.5484	18716.1	31.5173	-3.88222	18347.2	29.7345	-3.69606	18477.7	30.3515	-5.56307	18457.8	30.2564	-6.7636	18523.3	30.5708	-7.15859	18281.8	29.4303	-8.11066	18043.4	28.3487	-8.21894
		35.8	11496.1	19358.4	34.9615	18710.1	31.4873	-4.32532	18366	29.8222	-4.0214	18399.9	29.9817	-6.34589	18489.4	30.4077	-7.0254	18504.5	30.4801	-7.66234	18274	29.3941	-8.55993	18025.8	28.2703	-8.7104
		35.8667	11474.1	19305.6	34.6587	18683.5	31.3551	-4.15469	18338.3	29.6926	-3.84814	18374.8	29.8635	-6.16127	18519.5	30.5523	-6.5779	18456.9	30.252	-7.58757	18259.2	29.3258	-8.32535	18094.8	28.5784	-8.09949
		35.9333	11470.6	19295.5	34.6009	18681.6	31.3454	-4.10648	18314	29.5796	-3.90333	18391.5	29.942	-6.02492	18484	30.3816	-6.69082	18510.1	30.5069	-7.27486	18271.2	29.3811	-8.21223	18038.2	28.3254	-8.29463
		36	11481.9	19322.2	34.7535	18702.1	31.4474	-4.15713	18316.1	29.5891	-4.04648	18438.9	30.1665	-5.95307	18464.2	30.2868	-6.9382	18488.4	30.4027	-7.53174	18237.9	29.228	-8.51794	18034.7	28.3097	-8.46292
		36.0667	11494.4	19283.1	34.5305	18766.3	31.7697	-3.61185	18404.4	30.0032	-3.40932	18330.5	29.6562	-6.24033	18443.5	30.1884	-6.81363	18353.4	29.7634	-7.94795	18235.6	29.2171	-8.30585	18041.4	28.3397	-8.20989
		36.1333	11434.2	19290.6	34.573	18687	31.3724	-4.05171	18320.9	29.6117	-3.84343	18420.1	30.0775	-5.86166	18474.3	30.3355	-6.70913	18410.1	30.03	-7.72398	18366.4	29.824	-7.74153	18060.4	28.4245	-8.16778
		36.2	11492	19316.4	34.7199	18707.8	31.476	-4.0949	18296.4	29.4976	-4.10438	18419.5	30.0745	-6.01148	18492.8	30.4238	-6.76762	18451.5	30.2266	-7.67416	18246.9	29.2691	-8.44327	18046.8	28.3639	-8.37514
		36.2667	11491.4	19329.7	34.7964	18714.7	31.5104	-4.13706	18365.2	29.8186	-3.85988	18441.6	30.1795	-5.98294	18444.3	30.1923	-7.07562	18460.9	30.2711	-7.70615	18230	29.1916	-8.5973	18004.2	28.1746	-8.64098
		36.3333	11444.5	19306.4	34.6631	18712	31.4967	-4.01749	18399.4	29.9796	-3.56562	18416.5	30.0601	-5.96911	18469.6	30.3128	-6.82195	18515.3	30.5321	-7.31197	18256.3	29.3124	-8.34322	18094	28.5749	-8.10748
		36.4	11496.6	19322.7	34.756	18628.5	31.0828	-4.52426	18338.6	29.6939	-3.94418	18442.3	30.1826	-5.9395	18423.9	30.0954	-7.13217	18474.5	30.3363	-7.60063	18230.4	29.1936	-8.5549	18072.2	28.4772	-8.298
		36.4667	11463	19289.1	34.5643	18657.9	31.2278	-4.18759	18340.4	29.7023	-3.74409	18424.4	30.0979	-5.8325	18495.4	30.4362	-6.59974	18392.9	29.9486	-7.79664	18223.8	29.1633	-8.39349	17994.2	28.1304	-8.45312
		36.5333	11467.5	19256.4	34.3797	18759.7	31.7366	-3.49412	18341.6	29.7081	-3.55366	18341.7	29.7087	-6.03701	18452.9	30.2333	-6.61797	18477	30.3483	-7.21233	18270.1	29.3759	-7.99628	18022.1	28.254	-8.14489
		36.6	11461.6	19313.5	34.7036	18697.9	31.4267	-4.12797	18351.6	29.755	-3.83072	18461.6	30.2747	-5.79497	18459.7	30.2656	-6.90955	18420.7	30.0804	-7.80413	18208.1	29.0913	-8.60479	18032.5	28.3002	-8.42258
		36.6667	11509.1	19309.1	34.6782	18669.8	31.287	-4.24234	18284.2	29.4413	-4.11906	18439	30.167	-5.87733	18518.1	30.5456	-6.60415	18470.5	30.317	-7.5421	18223.8	29.1633	-8.50744	18006.5	28.1848	-8.51265
		36.7333	11460.1	19288.1	34.5591	18720.9	31.5414	-3.86876	18262.4	29.3404	-4.10076	18432	30.1337	-5.79154	18426.3	30.1066	-6.92411	18432.3	30.1353	-7.60477	18225.2	29.1697	-8.38189	17973.5	28.0391	-8.53919
		36.8	11505.1	19327.3	34.7823	18643.9	31.1589	-4.47445	18286	29.4497	-4.21468	18379	29.8836	-6.26482	18429.4	30.1217	-7.13223	18412.8	30.0427	-7.92057	18295.2	29.492	-8.28279	17997.7	28.146	-8.65552
		36.8667	11530	19304.1	34.6497	18690.1	31.3878	-4.11294	18298.7	29.5083	-4.02346	18418.4	30.0695	-5.94623	18382.2	29.8987	-7.22255	18400.2	29.9831	-7.84752	18250.8	29.2872	-8.35491	18039.3	28.3304	-8.33849
		36.9333	11438.6	19259.8	34.3988	18701.9	31.4467	-3.80319	18343.8	29.7185	-3.5624	18449.5	30.2169	-5.54807	18408.3	30.0216	-6.84885	18404.3	30.0027	-7.57711	18224.1	29.1647	-8.22668	17961.4	27.9857	-8.43235
		37	11465.2	19279.4	34.5093	18710.2	31.4878	-3.87261	18266.2	29.3581	-4.03327	18354.2	29.7672	-6.10826	18362.2	29.8045	-7.17637	18478	30.3528	-7.33741	18257	29.3154	-8.18637	18020.9	28.2486	-8.27994
		37.0667	11464.6	19294.8	34.5967	18689.8	31.3864	-4.06137	18287.9	29.4585	-4.02029	18439.3	30.1686	-5.79422	18394.1	29.9543	-7.11392	18443.8	30.1899	-7.58771	18234.8	29.2134	-8.37582	17973.1	28.0374	-8.57844
		37.1333	11456.2	19308.3	34.6737	18712.6	31.4997	-4.02503	18337.6	29.6894	-3.86642	18433.6	30.1416	-5.89819	18436.7	30.1559	-6.98932	18403.6	29.9994	-7.85518	18238.3	29.2297	-8.43647	17980.9	28.0716	-8.62125
		37.2	11507.9	19297.2	34.6105	18737.2	31.6234	-3.83818	18290.3	29.4694	-4.02314	18449.1	30.2151	-5.76148	18412.1	30.0394	-7.04267	18405.5	30.0084	-7.78301	18241.3	29.2434	-8.3596	17964.4	27.999	-8.63064
		37.2667	11442.2	19304.3	34.6507	18690.6	31.3902	-4.11158	18292.3	29.4786	-4.05423	18392.2	29.9458	-6.07106	18480.4	30.3643	-6.75802	18428.4	30.1168	-7.71489	18222	29.1549	-8.48832	18045.6	28.3584	-8.31148
		37.3333	11476.5	19292.5	34.584	18655.3	31.2149	-4.22013	18333.3	29.6694	-3.7967	18331.6	29.6615	-6.28856	18374.7	29.8632	-7.19231	18497.5	30.4465	-7.31839	18234.5	29.2123	-8.36413	17966	28.0059	-8.59731
		37.4	11430	19282.2	34.5252	18643.1	31.1548	-4.22144	18280.6	29.4246	-3.98265	18268.9	29.3706	-6.5207	18454.2	30.2394	-6.75737	18395.5	29.9611	-7.74494	18187.8	28.9988	-8.51881	17947.4	27.9244	-8.61995
		37.4667	11457.5	19279.9	34.5126	18727.3	31.5736	-3.7901	18331.4	29.6606	-3.73415	18377.6	29.8769	-6.00184	18427.4	30.1118	-6.87237	18415.5	30.0557	-7.63781	18196.5	29.0384	-8.46671	17984.5	28.0877	-8.44412
		37.5333	11457	19300.4	34.6288	18686.7	31.3708	-4.10909	18299.1	29.5103	-4.00062	18407.6	30.018	-5.97687	18419	30.072	-7.02835	18395.4	29.9605	-7.84924	18216.1	29.1278	-8.49352	17983	28.081	-8.56696
		37.6	11480.2	19313	34.7005	18712.6	31.5	-4.05154	18312.7	29.5735	-4.00912	18420.7	30.0801	-5.98648	18382.8	29.9012	-7.27084	18387.9	29.9254	-7.95598	18241.5	29.2444	-8.44855	17945.3	27.9151	-8.8046
		37.6667	11429.3	19253.7	34.3647	18640.8	31.1434	-4.07243	18353.3	29.7629	-3.48395	18386.5	29.9188	-5.81199	18391.5	29.9424	-6.89388	18411.5	30.0369	-7.50878	18186.2	28.9916	-8.3656	18017.5	28.2335	-8.15042
		37.7333	11425.2	19312.5	34.6977	18708.8	31.4808	-4.06799	18296.7	29.4991	-4.08069	18364.8	29.8168	-6.24693	18449.3	30.2159	-6.95332	18437.2	30.1586	-7.71996	18252.9	29.2968	-8.39335	17935.2	27.8709	-8.84597
		37.8	11458.9	19290.3	34.5712	18666.5	31.2707	-4.15154	18225.1	29.1689	-4.28436	18400.2	29.9831	-5.95417	18355.2	29.7719	-7.27086	18412.8	30.043	-7.70915	18254.1	29.3022	-8.26147	17975.1	28.0461	-8.54424
		37.8667	11430.1	19321	34.7465	18686	31.3675	-4.23014	18303.2	29.5292	-4.09942	18376.7	29.8725	-6.24017	18392.3	29.946	-7.27212	18387.7	29.9242	-8.00324	18257.4	29.3175	-8.42157	17962.7	27.9916	-8.77417
		37.9333	11438.4	19333.2	34.8165	18662.3	31.25	-4.41761	18276.2	29.4043	-4.29425	18428.2	30.1157	-6.0669	18362.4	29.8057	-7.48236	18370.7	29.8445	-8.15294	18207.7	29.0896	-8.7194	17946.2	27.9191	-8.91662
		38	11494	19310.1	34.6843	18698.5	31.4295	-4.10588	18309.5	29.5584	-4.00803	18403.2	29.9976	-6.05286	18420.5	30.0794	-7.07652	18337.1	29.6871	-8.17815	18212.7	29.1123	-8.56456	17956.7	27.9652	-8.73825
		38.0667	11459.5	19315	34.7119	18670.3	31.2896	-4.27333	18328.9	29.6486	-3.94534	18378.7	29.882	-6.19593	18325.4	29.6328	-7.55068	18395.6	29.9614	-7.93144	18161.3	28.8784	-8.826	17946.4	27.92	-8.81109
		38.1333	11436.9	19272	34.4678	18671.6	31.2956	-4.0232	18235.7	29.2177	-4.13216	18389.6	29.9332	-5.90069	18386.8	29.9202	-7.01914	18416.2	30.0588	-7.58986	18189.4	29.0058	-8.45444	17924.6	27.8244	-8.66257
		38.2	11444.7	19260.7	34.4042	18703.2	31.453	-3.80222	18314.9	29.5838	-3.7025	18378	29.8786	-5.8917	18417.7	30.066	-6.80971	18381.2	29.894	-7.69111	18201.6	29.0618	-8.33486	17923.5	27.8197	-8.6036
		38.2667	11429.2	19325.7	34.7735	18701.6	31.4449	-4.17966	18322.8	29.6203	-4.03533	18360.5	29.7967	-6.34287	18380.1	29.8886	-7.35646	18309.4	29.5579	-8.39654	18186.5	28.9929	-8.77308	17933.7	27.8641	-8.92856
		38.3333	11419.9	19335.7	34.8307	18622.1	31.0518	-4.62996	18266.6	29.3597	-4.35305	18379.2	29.8843	-6.31248	18358.4	29.7867	-7.51547	18327.2	29.641	-8.37055	18213.9	29.1178	-8.70535	17880.5	27.6323	-9.21757
		38.4	11473.4	19298.3	34.6166	18617.9	31.0311	-4.43658	18265.8	29.3563	-4.14243	18345.4	29.726	-6.25677	18401.9	29.9915	-7.09669	18431.8	30.1326	-7.66494	18144.5	28.8021	-8.80705	17915.6	27.7853	-8.85048
		38.4667	11452.4	19294.9	34.5976	18614	31.0115	-4.43718	18283.9	29.44	-4.0397	18310.2	29.5617	-6.40206	18369.3	29.8379	-7.23129	18367.8	29.8308	-7.94773	18143	28.7956	-8.79457	17952.4	27.9464	-8.67041
		38.5333	11468.3	19250.6	34.347	18610.2	30.9932	-4.20494	18317.1	29.5937	-3.63546	18294.3	29.4882	-6.22496	18337.6	29.6893	-7.12931	18363.6	29.8113	-7.71668	18212.3	29.1104	-8.22914	17950.2	27.9367	-8.42955
		38.6	11457.8	19252	34.3552	18621.7	31.0496	-4.15663	18251	29.2878	-3.94948	18356.3	29.7768	-5.94445	18318.2	29.5991	-7.22764	18434.3	30.1448	-7.39131	18156.5	28.8566	-8.49113	17898.7	27.7115	-8.66292
		38.6667	11455.3	19333.1	34.8157	18633.3	31.1067	-4.56014	18317.4	29.5951	-4.1027	18274.7	29.3972	-6.78467	18369.2	29.8373	-7.45004	18362.6	29.8062	-8.19046	18138.5	28.7752	-9.03304	17926.6	27.8332	-9.00177
		38.7333	11469.3	19249.6	34.3413	18663	31.2534	-3.939	18303.3	29.5297	-3.69373	18382.9	29.9019	-5.8055	18458.5	30.2598	-6.5531	18345.8	29.7278	-7.79446	18118.2	28.6834	-8.6504	17903.4	27.7321	-8.62845
		38.8	11452.2	19285.8	34.5457	18620.9	31.0455	-4.35132	18304.3	29.5346	-3.89325	18280.5	29.4243	-6.48755	18298.3	29.5067	-7.51061	18354.8	29.7701	-7.95657	18163.4	28.8876	-8.65057	17941.2	27.8969	-8.66798
		38.8667	11405.2	19253.3	34.3621	18609.2	30.9882	-4.22493	18325.3	29.6319	-3.61224	18354.6	29.769	-5.95917	18300.4	29.5165	-7.31712	18335.9	29.6813	-7.86168	18137.7	28.7717	-8.58292	17883.3	27.6444	-8.73687
		38.9333	11416.5	19278.6	34.5051	18654.4	31.2108	-4.14537	18394.3	29.9556	-3.4316	18332.6	29.6663	-6.20494	18387	29.9211	-7.05552	18339.7	29.6994	-7.98662	18197	29.0405	-8.45711	17871.5	27.5933	-8.93093
		39	11510.9	19264	34.4228	18626.5	31.0733	-4.20057	18266.8	29.3606	-3.94423	18398.2	29.9738	-5.81508	18364.5	29.8155	-7.07879	18368.5	29.834	-7.76973	18159.2	28.8687	-8.54658	17843.8	27.4735	-8.96849
		39.0667	11431	19256.9	34.3824	18545.8	30.6794	-4.55408	18281.9	29.4305	-3.83394	18398.1	29.9733	-5.77516	18375.3	29.8658	-6.98809	18354.7	29.7694	-7.79389	18106.1	28.6292	-8.74568	17911.8	27.7684	-8.6332
		39.1333	11484.4	19303.7	34.6475	18608.9	30.9869	-4.5116	18274.7	29.3973	-4.13223	18317.8	29.5974	-6.41619	18396.5	29.9659	-7.15309	18360	29.7943	-8.0341	18074.7	28.4883	-9.15166	17896.1	27.6999	-8.9667
		39.2	11456.3	19267.2	34.4406	18604.2	30.9635	-4.3282	18256.1	29.3117	-4.011	18359.9	29.7939	-6.01288	18392.5	29.947	-6.96517	18317.6	29.5962	-8.02534	18114.9	28.6684	-8.7647	17941.2	27.8972	-8.56261
		39.2667	11460.7	19334.3	34.8226	18638.9	31.1344	-4.53928	18231.6	29.1991	-4.5056	18341.8	29.709	-6.47966	18378.4	29.8805	-7.41364	18344.8	29.7229	-8.28062	18156.7	28.8573	-8.95783	17883.2	27.644	-9.19774
		39.3333	11463.5	19351.5	34.9213	18581.6	30.8535	-4.91892	18313.9	29.579	-4.22448	18395.4	29.9606	-6.32683	18301.4	29.5208	-7.87209	18379.9	29.8877	-8.21454	18089.7	28.5552	-9.35861	17837.7	27.4467	-9.49378
		39.4	11474.9	19322.7	34.7562	18624.6	31.0636	-4.54366	18265	29.3525	-4.28577	18337.7	29.6898	-6.43247	18345.5	29.7262	-7.50151	18369.9	29.8406	-8.09652	18122.7	28.7037	-9.045	17880.7	27.6331	-9.14227
		39.4667	11423	19266.3	34.4357	18618.3	31.0329	-4.25396	18217	29.1321	-4.18578	18331.4	29.6607	-6.14112	18360.1	29.7949	-7.11245	18291.8	29.4763	-8.1404	18043.6	28.3495	-9.07877	17916.9	27.7909	-8.66399
		39.5333	11447.6	19287.4	34.5549	18591	30.8991	-4.50693	18263.7	29.3465	-4.09052	18311.6	29.5685	-6.35253	18354.4	29.768	-7.25849	18402.2	29.9928	-7.74303	18123.7	28.7084	-8.83906	17949.7	27.9345	-8.63964
		39.6	11465.4	19240.6	34.2907	18609.6	30.99	-4.15171	18224.2	29.1648	-4.00799	18267.6	29.3645	-6.2923	18370.7	29.8446	-6.91758	18322.2	29.6178	-7.85376	18116.4	28.6752	-8.60792	17886.2	27.6569	-8.65291
		39.6667	11463.3	19241.7	34.2972	18672.3	31.2992	-3.84913	18210.4	29.1016	-4.07773	18305	29.5375	-6.12581	18398.8	29.9765	-6.79234	18348	29.7382	-7.73995	18145.4	28.8061	-8.48367	17814.4	27.3467	-8.96972
		39.7333	11428.6	19344.4	34.8809	18616.3	31.0229	-4.70904	18241	29.2418	-4.52114	18280.7	29.4248	-6.82215	18308.7	29.5548	-7.79764	18287.8	29.4579	-8.60393	18107.6	28.6358	-9.23759	17825.7	27.3952	-9.50489
		39.8	11457.5	19264.1	34.4233	18555.8	30.7277	-4.54666	18213.6	29.1165	-4.1889	18265.7	29.3556	-6.43381	18304.7	29.5362	-7.35866	18299.1	29.5102	-8.09397	18138.6	28.7754	-8.64034	17835.9	27.439	-9.00343
		39.8667	11418.9	19326.7	34.7788	18639.1	31.1352	-4.49462	18229.4	29.189	-4.47191	18322.2	29.6175	-6.52737	18275	29.3987	-7.85163	18318.7	29.6015	-8.3582	18055	28.4001	-9.37116	17868.8	27.5813	-9.21669
		39.9333	11418.7	19251.1	34.3499	18639.2	31.1358	-4.06522	18284.1	29.4408	-3.79127	18309.6	29.5592	-6.1568	18363.8	29.8123	-7.00923	18254.2	29.3028	-8.22806	18116.8	28.677	-8.6654	17807.5	27.3171	-9.05207
		40	11414.5	19221.1	34.182	18538.3	30.6432	-4.38986	18242.3	29.248	-3.81612	18235.4	29.2164	-6.33169	18416.7	30.0612	-6.59233	18325.3	29.632	-7.73088	18128.2	28.7285	-8.446	17869.8	27.5856	-8.61552
		40.0667	11424.3	19307.9	34.6714	18606.9	30.9769	-4.54551	18237.7	29.2269	-4.32653	18305.1	29.5379	-6.49956	18308	29.5518	-7.59115	18287.3	29.4557	-8.39656	18068.5	28.4603	-9.20354	17791.4	27.2476	-9.44297
		40.1333	11409.3	19290.2	34.5707	18600.4	30.9452	-4.47659	18217.1	29.1324	-4.32041	18249.4	29.2807	-6.65607	18299.4	29.5117	-7.53056	18302.9	29.5281	-8.22353	18066	28.4492	-9.11405	17818	27.3619	-9.22796
		40.2	11431	19246.2	34.3224	18592.6	30.9072	-4.26627	18276	29.4034	-3.80109	18253.2	29.298	-6.39044	18358.2	29.7859	-7.00801	18279.3	29.4185	-8.08482	18038.6	28.3271	-8.98772	17832.9	27.4264	-8.91511
		40.2667	11483.4	19273.7	34.4771	18606.1	30.9729	-4.3553	18267.3	29.3633	-3.99596	18250.3	29.2847	-6.55857	18295.8	29.4952	-7.4535	18274.9	29.3984	-8.25966	18064.6	28.4431	-9.02656	17865.9	27.5689	-8.92737
		40.3333	11459.7	19283.7	34.5341	18607.4	30.9793	-4.40584	18234.3	29.2112	-4.2049	18264.9	29.3523	-6.54789	18304.6	29.5358	-7.4698	18278.1	29.413	-8.30195	18081.1	28.5167	-9.00983	17847	27.4872	-9.06602
		40.4	11402.9	19259.7	34.3984	18565.6	30.7756	-4.47389	18260.6	29.3324	-3.94812	18251.7	29.2912	-6.47328	18288.5	29.4611	-7.40888	18252.8	29.2961	-8.28321	18081.2	28.5174	-8.87346	17868	27.5781	-8.83948
		40.4667	11444.1	19308.9	34.6771	18631.2	31.0963	-4.43191	18268	29.3664	-4.19284	18290.5	29.4705	-6.57266	18283	29.4356	-7.71307	18278.9	29.4165	-8.44151	18075.6	28.4921	-9.17748	17795.7	27.2663	-9.43005
		40.5333	11406.2	19308.5	34.6748	18512.4	30.5181	-5.00773	18235.9	29.2188	-4.3381	18275	29.3985	-6.64239	18275.5	29.4012	-7.74515	18244.4	29.2575	-8.59819	18094.8	28.5783	-9.08893	17861.7	27.5506	-9.14338
		40.6	11453	19251.5	34.3522	18575.7	30.8247	-4.37861	18229.5	29.1892	-4.04514	18277.8	29.4116	-6.30668	18306.5	29.5448	-7.27894	18288	29.4588	-8.07429	17986.9	28.0981	-9.24657	17823.9	27.3874	-8.98404
		40.6667	11474.5	19290	34.5697	18602.1	30.9533	-4.46749	18283.3	29.4371	-4.01471	18285.6	29.4478	-6.48801	18315.1	29.5845	-7.4568	18291.2	29.4738	-8.2768	18081.9	28.5203	-9.04191	17814.9	27.3485	-9.24036
		40.7333	11397	19277.1	34.4967	18532.7	30.6161	-4.73165	18282.4	29.4331	-3.94565	18289	29.4634	-6.39939	18308.7	29.5546	-7.41363	18292.8	29.481	-8.19663	18056.4	28.4066	-9.08264	17730.4	26.9875	-9.52835
		40.8	11450.3	19282.1	34.5246	18616.9	31.026	-4.34966	18277.3	29.4095	-3.99717	18237.8	29.2276	-6.66312	18292.9	29.4817	-7.5145	18299.3	29.5113	-8.19425	18041.8	28.3414	-9.17576	17725.5	26.9667	-9.57714
		40.8667	11434.4	19326.1	34.7758	18581	30.8503	-4.77663	18242.6	29.2493	-4.40861	18269.1	29.3714	-6.77054	18302.9	29.5278	-7.71957	18303.3	29.5297	-8.42705	18077.7	28.5017	-9.26662	17789.4	27.2392	-9.55575
		40.9333	11447.9	19264.7	34.4265	18586.3	30.8763	-4.40127	18230.7	29.1948	-4.11375	18221.3	29.1517	-6.64083	18338.2	29.6924	-7.20567	18312.7	29.5737	-8.03376	18023.1	28.2585	-9.16047	17857.7	27.5335	-8.91214
		41	11419.7	19297.7	34.6137	18570.3	30.7981	-4.6667	18195.8	29.0351	-4.46063	18215.5	29.125	-6.85473	18351.3	29.7534	-7.33183	18254.8	29.3054	-8.48918	18014.4	28.2196	-9.38659	17776.1	27.1821	-9.4508
		41.0667	11404.3	19304.7	34.6535	18593.9	30.9133	-4.59123	18230.9	29.1956	-4.33998	18243	29.2513	-6.76833	18277.3	29.4092	-7.71585	18296.4	29.4977	-8.3367	17996.8	28.1417	-9.50427	17780.9	27.2028	-9.46992
		41.1333	11451.3	19197.8	34.0523	18545.3	30.677	-4.2264	18256.6	29.3138	-3.62061	18211.7	29.1077	-6.3107	18319.2	29.6037	-6.92015	18308.3	29.5528	-7.68041	18049.1	28.3739	-8.67092	17840.5	27.4591	-8.61236
		41.2	11396.6	19280.6	34.5166	18549.3	30.6961	-4.67154	18203.2	29.069	-4.32967	18234.4	29.2116	-6.67109	18261.9	29.3381	-7.65008	18204.9	29.0769	-8.62065	18103.8	28.6186	-8.89046	17863	27.5563	-8.97949
		41.2667	11429.4	19296.2	34.6051	18529.6	30.6009	-4.8552	18215	29.1228	-4.36434	18259	29.3248	-6.64634	18275	29.3985	-7.67812	18302.4	29.5255	-8.26046	18018.4	28.2373	-9.36028	17763.5	27.1281	-9.49609
		41.3333	11393.7	19283.6	34.5333	18625.8	31.0699	-4.31448	18182.6	28.975	-4.44033	18272.4	29.3865	-6.51285	18273.8	29.3932	-7.61161	18208.5	29.093	-8.62116	18056.1	28.4053	-9.12051	17756.8	27.0995	-9.45291
		41.4	11426.3	19266.4	34.436	18538.6	30.6443	-4.64271	18137.7	28.7713	-4.54675	18336.9	29.6864	-6.11566	18339.4	29.6978	-7.20972	18255	29.3065	-8.31036	18058	28.4137	-9.01476	17801.6	27.2917	-9.16344
		41.4667	11411.8	19278.2	34.5026	18563.8	30.7669	-4.58682	18224.9	29.168	-4.2167	18246	29.2651	-6.60367	18270.3	29.3769	-7.59732	18306.2	29.5435	-8.1401	17980.8	28.0714	-9.42375	17774.9	27.177	-9.3448
		41.5333	11424.3	19256.3	34.3792	18532.7	30.6161	-4.61421	18168	28.9086	-4.35269	18270.4	29.3777	-6.36765	18308.5	29.5538	-7.29699	18268.5	29.3686	-8.19154	17953.9	27.9528	-9.41893	17760.1	27.1138	-9.28462
		41.6	11431.6	19271.1	34.4628	18572.6	30.8095	-4.50441	18224.8	29.1677	-4.17717	18218.6	29.1394	-6.68953	18331.8	29.6622	-7.27211	18268.8	29.37	-8.27371	18019.4	28.242	-9.21329	17746.6	27.0563	-9.42571
		41.6667	11444.6	19290.9	34.5748	18564.6	30.7703	-4.65549	18200.3	29.0555	-4.40131	18221.2	29.1514	-6.78947	18297.8	29.5043	-7.54198	18271.8	29.3839	-8.37177	18027.4	28.2772	-9.29005	17766.2	27.1399	-9.454
		41.7333	11417.9	19300.1	34.6271	18570.8	30.8006	-4.67763	18214.8	29.122	-4.38726	18308.1	29.5522	-6.44102	18226.1	29.1736	-7.92506	18259.4	29.3268	-8.48128	17992.8	28.124	-9.49561	17766.3	27.1404	-9.50588
		41.8	11449.3	19221.6	34.1846	18530.6	30.6059	-4.4297	18152.6	28.8387	-4.22798	18228	29.1823	-6.36836	18222.9	29.1588	-7.4973	18211.6	29.1072	-8.25829	18061	28.4271	-8.74994	17717.7	26.9335	-9.27027
		41.8667	11386.2	19264.3	34.4245	18547.6	30.6879	-4.58765	18136.8	28.7675	-4.53908	18334.6	29.6755	-6.11506	18317	29.5936	-7.30246	18240.1	29.2381	-8.36728	18027.8	28.2792	-9.13777	17764.5	27.1326	-9.31107
		41.9333	11466.9	19323.7	34.7619	18601	30.9482	-4.66477	18152.6	28.8389	-4.80511	18271.1	29.3807	-6.74729	18267.5	29.3643	-7.86918	18213.4	29.1158	-8.82708	18044.7	28.3545	-9.39993	17759.2	27.11	-9.6711
		42	11462.5	19237.7	34.2744	18640.2	31.1405	-3.98503	18177.8	28.9532	-4.20332	18249.2	29.2797	-6.36083	18235.5	29.2166	-7.52934	18205.3	29.0784	-8.37699	17954.6	27.9559	-9.31102	17778.4	27.1921	-9.10152
		42.0667	11474.7	19270.2	34.4576	18567.3	30.7838	-4.52486	18254.7	29.3052	-4.03458	18207.2	29.0874	-6.7363	18192.9	29.0222	-7.90704	18199.6	29.0527	-8.58586	17995.4	28.1357	-9.31446	17719.3	26.9401	-9.53674
		42.1333	11448.8	19299.6	34.624	18514.8	30.5297	-4.94543	18208.7	29.0942	-4.41192	18259.2	29.3259	-6.66418	18300.4	29.5161	-7.57948	18336.9	29.6861	-8.11885	17969.9	28.0232	-9.59334	17735.8	27.0101	-9.63312
		42.2	11440.9	19249.2	34.3394	18534.1	30.6226	-4.56787	18209.8	29.0992	-4.12229	18305.9	29.5419	-6.16361	18280.9	29.426	-7.38499	18216.3	29.1288	-8.39152	17952.4	27.9464	-9.38551	17714.9	26.9213	-9.43723
		42.2667	11396.9	19258.7	34.3926	18506.6	30.4902	-4.75346	18193.5	29.0248	-4.24995	18193	29.0225	-6.73621	18230.1	29.1919	-7.67233	18224.3	29.1654	-8.40817	17977.6	28.0573	-9.32781	17713.9	26.9171	-9.49473
		42.3333	11459.4	19273.8	34.478	18630.4	31.0924	-4.2367	18206.2	29.0826	-4.2775	18261.5	29.3366	-6.50752	18252	29.2929	-7.65671	18210.7	29.1031	-8.55585	17999.9	28.1556	-9.31486	17694.5	26.835	-9.66217
		42.4	11484.7	19312.7	34.6992	18595.3	30.92	-4.63024	18168	28.9089	-4.67239	18192.1	29.0185	-7.0468	18211.7	29.1079	-8.06283	18229.6	29.1899	-8.69023	17982.1	28.0769	-9.61477	17738.9	27.0235	-9.69484
		42.4667	11466.2	19293.5	34.5897	18489.4	30.4077	-5.03303	18141.7	28.7895	-4.68224	18220.7	29.1488	-6.80699	18232.8	29.2044	-7.8568	18185.7	28.9893	-8.78124	17950.9	27.9396	-9.64261	17734.9	27.0063	-9.60258
		42.5333	11411	19267.7	34.4435	18538.2	30.6425	-4.65215	18163	28.886	-4.43963	18200.2	29.0553	-6.75431	18230.9	29.1959	-7.71919	18194.4	29.029	-8.59546	18000.3	28.1572	-9.27881	17707.8	26.8915	-9.57122
		42.6	11409.9	19277	34.4958	18525.1	30.5794	-4.7674	18133.8	28.754	-4.62384	18299.4	29.5119	-6.35	18217.8	29.1355	-7.83178	18175.6	28.9433	-8.73335	18003.1	28.1699	-9.31834	17737.5	27.0176	-9.4973
		42.6667	11423.8	19242.3	34.3007	18561.6	30.7562	-4.39561	18127.7	28.7261	-4.45674	18210.3	29.1012	-6.56563	18183.5	28.9789	-7.79337	18184.7	28.9846	-8.49702	17976.2	28.0511	-9.24216	17724.1	26.9606	-9.35929
		42.7333	11414.6	19255.3	34.3736	18568.1	30.7877	-4.43705	18070.5	28.4693	-4.78645	18217.4	29.1337	-6.60604	18223.4	29.1611	-7.68409	18211.4	29.1063	-8.44832	18015	28.2223	-9.14385	17707.7	26.8908	-9.50203
		42.8	11419.9	19228.2	34.2213	18477	30.3483	-4.72406	18155.7	28.8527	-4.25065	18252	29.2927	-6.29466	18282.8	29.4349	-7.2579	18178.3	28.9554	-8.44681	18027.7	28.2788	-8.93499	17752.4	27.0808	-9.15963
		42.8667	11428.3	19304.9	34.6546	18549.1	30.6955	-4.81023	18233.7	29.2085	-4.32823	18220.5	29.1481	-6.87264	18230.8	29.1952	-7.93093	18159.1	28.8682	-8.96728	17948.6	27.9295	-9.71755	17692.6	26.8271	-9.84666
		42.9333	11453.5	19223.2	34.1934	18513.1	30.5213	-4.52313	18175.9	28.9447	-4.13074	18255.6	29.3094	-6.25009	18208.1	29.0914	-7.57357	18207.8	29.0898	-8.28446	17906.8	27.7469	-9.43898	17749.5	27.0687	-9.14385
		43	11428.2	19265.9	34.4333	18481.9	30.3715	-4.91294	18157.8	28.8623	-4.45311	18206	29.0816	-6.71781	18194.5	29.0294	-7.87543	18240.3	29.2387	-8.37554	17956.8	27.9654	-9.4604	17709.6	26.8991	-9.5534
		43.0667	11424.6	19287.2	34.5536	18524.6	30.5767	-4.828	18159.1	28.8683	-4.5674	18221.6	29.1529	-6.76677	18192.1	29.0181	-8.00705	18191.5	29.0156	-8.71889	18003.1	28.1695	-9.37657	17699.4	26.8559	-9.71691
		43.1333	11450.9	19224.6	34.2012	18481	30.3671	-4.68516	18168.2	28.9094	-4.1739	18247.7	29.2729	-6.29439	18253.6	29.3001	-7.37264	18178.7	28.9572	-8.4249	18001.8	28.1638	-9.02986	17658	26.6811	-9.53934
		43.2	11400.8	19218.6	34.1678	18543.7	30.6692	-4.34965	18196.6	29.039	-4.01084	18197.9	29.0447	-6.48919	18199.2	29.0508	-7.58853	18193.5	29.0248	-8.32385	17949.9	27.9352	-9.22502	17682.2	26.7832	-9.4037
		43.2667	11447.1	19275.5	34.4878	18524.7	30.5772	-4.7616	18159.7	28.8709	-4.49893	18182.4	28.9742	-6.87966	18276.5	29.4059	-7.55347	18216.5	29.1296	-8.53905	17911.3	27.7664	-9.71382	17660.6	26.692	-9.81491
		43.3333	11437.7	19307.8	34.6709	18498.3	30.4505	-5.07153	18146.8	28.8126	-4.74039	18281.7	29.4295	-6.60755	18174.8	28.9397	-8.20278	18186.7	28.9935	-8.85833	17984.6	28.0881	-9.57529	17717.5	26.9326	-9.75749
		43.4	11426.3	19221.1	34.1815	18531.4	30.6098	-4.42284	18154.2	28.8459	-4.21774	18239.1	29.2332	-6.31447	18166.7	28.9028	-7.75034	18159	28.868	-8.49444	17922.7	27.8163	-9.35771	17697.5	26.8477	-9.35301
		43.4667	11442.4	19234.6	34.2574	18536.9	30.6363	-4.47212	18178.6	28.957	-4.18245	18166	28.8997	-6.72379	18242.5	29.2491	-7.47985	18166.1	28.8998	-8.53848	17990.2	28.1127	-9.13722	17671.1	26.7361	-9.54043
		43.5333	11432.7	19218.3	34.1661	18497.5	30.4467	-4.57051	18157.6	28.8614	-4.1868	18143.2	28.7961	-6.73611	18230.3	29.1931	-7.44461	18200.1	29.0549	-8.29215	17970.2	28.0244	-9.13418	17692.2	26.8253	-9.36
		43.6	11447.6	19253.6	34.3641	18509.3	30.5032	-4.71192	18186.2	28.9914	-4.25478	18213	29.1137	-6.61642	18223.7	29.1627	-7.67289	18196.8	29.0395	-8.50545	17958	27.971	-9.38554	17659.8	26.6887	-9.69453
		43.6667	11430.6	19227.2	34.216	18466	30.2958	-4.77126	18134.6	28.7574	-4.3407	18215	29.1228	-6.45931	18182.8	28.9758	-7.71172	18208.6	29.0934	-8.30347	17890.6	27.6764	-9.53209	17659.1	26.6857	-9.54942
		43.7333	11441.3	19330.7	34.8019	18436	30.1529	-5.50003	18156.4	28.8559	-4.82802	18235.4	29.2161	-6.95182	18192.4	29.0198	-8.25366	18124.5	28.7117	-9.27105	17936.7	27.8776	-9.91675	17692.1	26.8251	-9.99598
		43.8	11419.5	19258.8	34.393	18473.4	30.3311	-4.91299	18173.8	28.9351	-4.34006	18184.2	28.9824	-6.77673	18193.5	29.0247	-7.83985	18193	29.0224	-8.55155	17933.9	27.865	-9.52047	17630	26.5637	-9.8485
		43.8667	11393.7	19270	34.4563	18555.5	30.7262	-4.58125	18115	28.669	-4.66944	18193	29.0226	-6.79982	18248.7	29.2774	-7.65052	18147.7	28.8166	-8.82072	17874.7	27.6071	-9.84177	17647.8	26.6383	-9.83719
		43.9333	11419	19184.2	33.9767	18427.1	30.1104	-4.71739	18146.8	28.8125	-4.04626	18225.4	29.1706	-6.1722	18192.3	29.019	-7.42926	18161.1	28.8773	-8.28029	17925.4	27.8278	-9.14136	17658.3	26.6823	-9.31357
		44	11405.5	19206.1	34.098	18532.1	30.6131	-4.33599	18110.6	28.6495	-4.33067	18182.7	28.9756	-6.48859	18258.6	29.3228	-7.24678	18097.6	28.5911	-8.68791	17916.4	27.7885	-9.302	17647	26.635	-9.48226
		44.0667	11456.6	19276.9	34.4953	18494.5	30.4322	-4.91423	18089.8	28.5557	-4.82172	18160.6	28.8751	-6.98628	18242.8	29.2505	-7.7164	18147.9	28.8177	-8.85857	17906.8	27.7469	-9.7409	17625.6	26.5453	-9.96924
		44.1333	11414.1	19283.1	34.5305	18466.5	30.298	-5.08355	18150.2	28.8279	-4.58469	18142.8	28.7945	-7.10213	18246.2	29.2661	-7.73594	18086.2	28.5395	-9.17194	17893.1	27.6871	-9.83587	17661.8	26.6973	-9.85236
		44.2	11420.3	19254.5	34.369	18491.3	30.4168	-4.80328	18150.2	28.828	-4.42304	18240.7	29.2406	-6.49443	18226.7	29.1762	-7.66428	18099.2	28.5982	-8.9517	17956.2	27.9628	-9.39864	17638.7	26.5998	-9.78831
		44.2667	11425.8	19282.8	34.5287	18482.6	30.3749	-5.00488	18190.8	29.0122	-4.39859	18134.9	28.7589	-7.13588	18188.2	29.0004	-7.99991	18142.7	28.7939	-8.91574	17869.5	27.5844	-9.93676	17646	26.6305	-9.91735
		44.3333	11436.9	19162.9	33.859	18503.4	30.4746	-4.23544	18137.5	28.7706	-3.97047	18215.5	29.1252	-6.09983	18241	29.2422	-7.08837	18116.4	28.6752	-8.36471	17953	27.949	-8.90244	17605.9	26.4628	-9.41534
		44.4	11396.2	19239.8	34.2865	18522.7	30.5676	-4.56999	18049.1	28.3738	-4.79479	18217.9	29.1362	-6.51642	18214.3	29.1197	-7.63841	18134.7	28.7578	-8.70967	17911.8	27.7685	-9.51052	17593	26.4087	-9.897
		44.4667	11441.9	19262	34.4111	18441.5	30.179	-5.08314	18141.3	28.7878	-4.5054	18122.1	28.7012	-7.07599	18155.8	28.8535	-8.02916	18079.9	28.5114	-9.08063	17892.5	27.6844	-9.71922	17632.3	26.573	-9.85726
		44.5333	11409.5	19253.2	34.3618	18437.1	30.158	-5.0549	18161.6	28.8798	-4.36408	18180.3	28.9645	-6.7634	18154.3	28.8467	-7.98672	18124.6	28.7121	-8.83061	17955.9	27.9617	-9.39259	17616.7	26.5078	-9.87317
		44.6	11439.1	19235.7	34.2634	18501.9	30.4675	-4.64693	18128.9	28.7317	-4.41373	18153.7	28.8439	-6.78562	18244.1	29.2563	-7.47864	18042.6	28.3452	-9.09912	17953.9	27.953	-9.30287	17665.7	26.7133	-9.56924
		44.6667	11429.9	19279.4	34.5095	18464.7	30.2896	-5.07104	18048.3	28.3702	-5.02146	18143.1	28.7959	-7.0797	18170.7	28.921	-8.06007	18145	28.8045	-8.88601	17869.5	27.5844	-9.91759	17617.1	26.5095	-10.0192
		44.7333	11422.8	19256.1	34.3777	18431	30.1291	-5.09977	18149.5	28.8249	-4.43497	18211.7	29.108	-6.63586	18205.1	29.0778	-7.77152	18153.8	28.8443	-8.71436	17870.2	27.5876	-9.78259	17638.9	26.6009	-9.79601
		44.8	11383.3	19254.4	34.3685	18523.2	30.57	-4.64963	18113	28.6601	-4.5905	18192.2	29.0187	-6.71588	18230.2	29.1927	-7.64741	18114	28.6646	-8.88481	17852.4	27.5107	-9.85034	17615.6	26.503	-9.88467
		44.8667	11426.7	19217.2	34.1598	18473.7	30.3326	-4.67828	18130.5	28.7387	-4.30313	18170	28.9177	-6.60818	18205.4	29.0788	-7.5525	18161.3	28.8782	-8.46246	17849.3	27.4972	-9.65506	17615.8	26.5043	-9.6747
		44.9333	11482.8	19253.7	34.3646	18472.3	30.3257	-4.89	18151.1	28.8321	-4.41461	18111.8	28.6546	-7.07611	18127.5	28.7256	-8.11053	18128.9	28.7319	-8.81365	17953	27.9489	-9.40823	17610.8	26.4832	-9.90062
		45	11394.4	19333.9	34.8203	18514.1	30.5264	-5.145	18107.3	28.6343	-5.06815	18219.8	29.1447	-7.04172	18254.2	29.3026	-7.98929	18085.4	28.5361	-9.46514	17956.6	27.9645	-9.84831	17596.4	26.4229	-10.4166
		45.0667	11412.8	19277.1	34.4965	18521.4	30.5613	-4.78632	18106.4	28.6305	-4.74809	18128.2	28.7288	-7.13386	18190.8	29.0124	-7.95573	18086.2	28.5397	-9.13771	17869.6	27.585	-9.90406	17644.9	26.626	-9.88967
		45.1333	11409.6	19258.6	34.3921	18472.3	30.3259	-4.91728	18090.1	28.557	-4.71717	18106.3	28.6299	-7.12828	18168.2	28.9097	-7.95397	18089.8	28.5558	-9.01722	17831.4	27.4198	-9.96477	17536	26.1719	-10.2393
		45.2	11428.6	19278.2	34.503	18468.3	30.3068	-5.04722	18057.9	28.4132	-4.97189	18150.2	28.8279	-7.04117	18176.5	28.9472	-8.02739	18158.9	28.8675	-8.8164	17923.6	27.8203	-9.67518	17635.4	26.5861	-9.93605
		45.2667	11421.6	19298.7	34.6189	18426.5	30.1075	-5.36249	18088.4	28.5495	-4.95155	18150.1	28.8276	-7.15743	18117.2	28.6792	-8.41131	18120.8	28.6951	-9.10478	17917.9	27.7952	-9.81621	17581.9	26.3625	-10.2756
		45.3333	11428.5	19269.4	34.4532	18499.3	30.4551	-4.84915	18105.6	28.6269	-4.70839	18119.9	28.6911	-7.12815	18205.3	29.0788	-7.84596	18130.7	28.7398	-8.8943	17877.8	27.6206	-9.82508	17624.7	26.5414	-9.93098
		45.4	11446.4	19279.4	34.5096	18448.6	30.2129	-5.14779	18072.7	28.4792	-4.91248	18182.9	28.9762	-6.89953	18163.3	28.8871	-8.09405	18149.3	28.8238	-8.86672	17858.8	27.5381	-9.964	17612.6	26.4905	-10.0383
		45.4667	11442.8	19306.9	34.6657	18442.2	30.1824	-5.33439	18111	28.6512	-4.89662	18142	28.7909	-7.24092	18129.8	28.7359	-8.40144	18174.3	28.9373	-8.90935	17903.3	27.7315	-9.92674	17542.3	26.1982	-10.4868
		45.5333	11447.6	19279.9	34.5125	18465.7	30.2942	-5.06939	18087.6	28.5458	-4.84886	18191.1	29.0138	-6.86488	18218	29.1366	-7.84747	18082.8	28.5245	-9.16898	17841	27.4611	-10.044	17648.5	26.6411	-9.89061
		45.6	11422.4	19232.4	34.2449	18463.6	30.2841	-4.81191	18097.8	28.5918	-4.53525	18127.7	28.7265	-6.88453	18141.5	28.7885	-7.92797	18067.2	28.4545	-8.97137	17843	27.47	-9.76746	17522.6	26.1166	-10.1475
		45.6667	11432.5	19259	34.3941	18505.3	30.4841	-4.76108	18130.6	28.7392	-4.53697	18144.7	28.803	-6.95718	18139.8	28.7811	-8.08459	18120.9	28.6955	-8.87955	17900.1	27.7175	-9.66911	17620.6	26.5242	-9.88906
		45.7333	11425.7	19320.6	34.7441	18454.2	30.2395	-5.35572	18004.5	28.1758	-5.45041	18195.7	29.0345	-7.07573	18175.7	28.9437	-8.272	18112.6	28.6584	-9.26666	17815.2	27.35	-10.3866	17564	26.2879	-10.4754
		45.8	11463	19227.4	34.2172	18428.6	30.1175	-4.95074	18113.8	28.6638	-4.43549	18094.2	28.5757	-7.00758	18163.7	28.8892	-7.79961	18093.5	28.5724	-8.82573	17889.8	27.6726	-9.53711	17567	26.3004	-9.93597
		45.8667	11457.4	19236.9	34.2704	18451.9	30.2285	-4.89292	18125.9	28.7184	-4.43407	18189.2	29.0052	-6.63125	18113.8	28.6638	-8.07813	18024.9	28.2662	-9.1851	17890.7	27.6765	-9.58637	17587.9	26.3873	-9.90223
		45.9333	11397.2	19269.6	34.4544	18472.1	30.325	-4.98048	18070.2	28.4682	-4.86826	18109.5	28.6443	-7.17623	18172.5	28.929	-7.99692	18108.4	28.6393	-8.99599	17879.7	27.6289	-9.81802	17599	26.4338	-10.0398
		46	11440.9	19246.7	34.325	18425.2	30.1014	-5.07472	18069.5	28.4649	-4.74227	18180.5	28.9656	-6.72552	18076.3	28.4952	-8.30136	18127.8	28.7268	-8.77914	17877	27.617	-9.70048	17496.5	26.009	-10.3352
		46.0667	11451.1	19258	34.3887	18417.2	30.0634	-5.17634	18060	28.4228	-4.84801	18114.1	28.6649	-7.08989	18152.1	28.8366	-8.02369	18064	28.4403	-9.12932	17784.1	27.2166	-10.1646	17536.2	26.1727	-10.2352
		46.1333	11445.5	19281	34.5185	18438	30.1623	-5.20728	18087.4	28.5452	-4.85536	18158.1	28.8637	-7.02093	18155.3	28.8512	-8.13883	18068.2	28.4593	-9.24014	17790.2	27.2425	-10.2685	17568.6	26.3071	-10.2306
		46.2	11451.5	19210.6	34.1235	18494.4	30.4313	-4.54321	18111.2	28.6522	-4.3534	18173	28.9312	-6.55837	18137.5	28.7705	-7.8245	18067.5	28.456	-8.84837	17854.5	27.5197	-9.59629	17625.3	26.5439	-9.59881
		46.2667	11435.2	19234.5	34.2565	18472.8	30.328	-4.77962	18109	28.6421	-4.4965	18049.3	28.3747	-7.24792	18117.6	28.681	-8.04707	18151.5	28.8338	-8.60364	17856.6	27.5287	-9.72025	17548.2	26.2226	-10.0531
		46.3333	11428.5	19271.9	34.4669	18479.3	30.3591	-4.95887	18052.8	28.3906	-4.95838	18175.3	28.9417	-6.89124	18194	29.0269	-7.91157	18042.5	28.3444	-9.30338	17833.6	27.4294	-10.0299	17523.7	26.1212	-10.3649
		46.4	11440.8	19272.8	34.4721	18518.2	30.5462	-4.77703	18019.7	28.2434	-5.11079	18145	28.8043	-7.03388	18087.6	28.5461	-8.39761	18083.8	28.529	-9.12402	17891.5	27.6802	-9.78441	17504.5	26.0417	-10.4496
		46.4667	11415.2	19264.9	34.4275	18429.7	30.123	-5.15559	18077.5	28.5007	-4.80896	18163.4	28.8877	-6.90591	18130.9	28.7408	-8.15828	18044.5	28.3536	-9.25487	17763.9	27.1302	-10.2898	17515.9	26.089	-10.3577
		46.5333	11373.1	19207.7	34.1071	18443.4	30.1877	-4.77041	18103.1	28.6155	-4.37365	18158.1	28.8637	-6.60952	18180.8	28.9669	-7.61174	18018.7	28.2386	-9.04937	17792.7	27.2535	-9.84607	17584.7	26.3742	-9.75206
		46.6	11419.5	19202.5	34.078	18431.4	30.1308	-4.79828	18084.2	28.5306	-4.42949	18135.5	28.7617	-6.68236	18244.9	29.2602	-7.28938	18053.3	28.3926	-8.86627	17776.3	27.183	-9.88747	17527.9	26.1385	-9.95869
		46.6667	11408.3	19256.6	34.3806	18420	30.0771	-5.15459	18099.1	28.5977	-4.665	18110.3	28.648	-7.09871	18114.7	28.6678	-8.18436	18090.1	28.5573	-9.00421	17769.7	27.155	-10.2181	17492.2	25.9912	-10.4086
		46.7333	11411.6	19284	34.5354	18445.3	30.1969	-5.18955	18042.4	28.3443	-5.0732	18078.3	28.5043	-7.39722	18172.6	28.9297	-8.0773	18072.2	28.4771	-9.23927	17789.6	27.2399	-10.288	17565.8	26.2956	-10.2589
		46.8	11421.9	19309.7	34.6819	18421	30.0818	-5.45118	18055.6	28.4031	-5.16099	18114.5	28.667	-7.38108	18119.1	28.6874	-8.46606	18134.5	28.757	-9.10584	17863.4	27.5581	-10.1163	17534.8	26.1669	-10.5342
		46.8667	11419.8	19164.3	33.867	18458.2	30.2582	-4.45984	18086.5	28.5409	-4.20822	18036.2	28.3164	-6.91668	18132.1	28.7462	-7.59233	18047	28.3646	-8.68336	17771.1	27.1609	-9.69861	17530.7	26.1502	-9.73593
		46.9333	11451	19197.9	34.0529	18483.8	30.3808	-4.52314	18013.3	28.2149	-4.72005	18136.1	28.7644	-6.65455	18121	28.6963	-7.82817	18029.7	28.2875	-8.94627	17751.6	27.0774	-9.96798	17528	26.1389	-9.9332
		47	11443.2	19245.7	34.3195	18468.2	30.306	-4.8646	18172.4	28.9285	-4.27308	18107.1	28.6336	-7.05204	18131.6	28.7441	-8.047	17996.3	28.1397	-9.36073	17780.7	27.2019	-10.1101	17501.4	26.0292	-10.3095
		47.0667	11421	19201.4	34.0719	18415.9	30.0574	-4.86556	18094.6	28.5773	-4.37665	18120.4	28.6933	-6.74467	18167.5	28.9062	-7.63723	18027.9	28.2796	-8.97317	17753.4	27.0854	-9.97892	17517.5	26.0955	-9.99554
		47.1333	11448.2	19230.5	34.2341	18361.7	29.802	-5.2832	18116.6	28.6764	-4.43979	18095.9	28.5831	-7.01716	18090.5	28.559	-8.14669	17993.6	28.1275	-9.28752	17861.5	27.5498	-9.67678	17476	25.9247	-10.3286
		47.2	11447.5	19236.1	34.2656	18398.1	29.9735	-5.14311	18063.4	28.4375	-4.7101	18037.2	28.3207	-7.31091	18144.6	28.8026	-7.93452	18045.1	28.3562	-9.09027	17802.7	27.2964	-9.96163	17467.2	25.8883	-10.3964
		47.2667	11438.9	19267.4	34.4416	18427.8	30.1139	-5.17876	18079.2	28.5086	-4.81511	18121.5	28.6983	-7.10936	18120.4	28.6935	-8.2197	18041.6	28.3404	-9.28215	17749.3	27.0679	-10.3662	17477.6	25.9311	-10.5297
		47.3333	11402.8	19239.2	34.2829	18422.8	30.0901	-5.04387	18020.7	28.2476	-4.91742	18121.8	28.6999	-6.94913	18084.7	28.5328	-8.22171	17999.5	28.1538	-9.31	17765.5	27.1368	-10.1386	17478.1	25.9332	-10.3689
		47.4	11389.7	19222.7	34.1909	18386.1	29.9169	-5.12506	18066.2	28.4503	-4.62274	18106	28.6287	-6.9283	18057.1	28.4098	-8.25273	18029.6	28.287	-9.08485	17750.7	27.0738	-10.1096	17455.7	25.8414	-10.3687
		47.4667	11426.2	19208.6	34.1119	18454.5	30.2408	-4.72212	18010.7	28.2033	-4.79069	18074.9	28.4889	-6.98906	18182.2	28.9731	-7.6103	18049.8	28.3772	-8.9156	17708.6	26.8948	-10.2095	17479.6	25.9394	-10.1917
		47.5333	11397.9	19171.7	33.9078	18451.4	30.2262	-4.53269	18031.6	28.2962	-4.49371	18079.7	28.5107	-6.76314	18067.7	28.4568	-7.92252	17998.5	28.1495	-8.93921	17765.2	27.1357	-9.76453	17491.8	25.9896	-9.93738
		47.6	11422.4	19213.5	34.1392	18423.1	30.0915	-4.8988	18015	28.2224	-4.79889	18083.3	28.5268	-6.97845	18080.8	28.5157	-8.09504	18009.8	28.1994	-9.12069	17713.9	26.9171	-10.2146	17462.7	25.8702	-10.2882
		47.6667	11415.5	19238.8	34.2805	18409.9	30.0293	-5.10233	17978.5	28.0612	-5.1014	18060.2	28.4233	-7.22333	18067.5	28.4562	-8.29594	17970.2	28.0246	-9.43687	17695.6	26.8395	-10.4335	17463.8	25.8745	-10.4253
		47.7333	11395.1	19242.8	34.3035	18405.9	30.0101	-5.14453	18111.7	28.6544	-4.5312	18046.3	28.3616	-7.30804	18082.3	28.5224	-8.25269	17976.4	28.0516	-9.43281	17713.4	26.9151	-10.3809	17468.2	25.8927	-10.43
		47.8	11409.5	19150.4	33.7907	18420.4	30.0787	-4.56308	18046.6	28.3629	-4.30984	18061.1	28.4275	-6.72923	18091.9	28.5655	-7.69677	17988.4	28.1046	-8.86704	17807.7	27.3176	-9.46561	17391.9	25.581	-10.2289
		47.8667	11457	19234.7	34.2581	18447.1	30.2056	-4.90352	18015	28.2226	-4.91761	18027.1	28.2763	-7.34793	18091.9	28.5653	-8.16431	18036.5	28.3177	-9.12133	17796.8	27.2711	-9.9795	17485	25.9618	-10.3155
		47.9333	11431.2	19182.7	33.9683	18399.7	29.9811	-4.83831	18042.5	28.3446	-4.50584	18022.9	28.2575	-7.0769	18035.5	28.3134	-8.1265	17982.6	28.079	-9.07024	17801	27.289	-9.67187	17536.5	26.1742	-9.81327
		48	11419.2	19226.2	34.2102	18378.2	29.8798	-5.1815	18105.1	28.6245	-4.46778	18108.5	28.6399	-6.93643	18100.1	28.6019	-8.07981	18056.1	28.405	-8.98608	17749.6	27.0689	-10.1338	17459.7	25.8579	-10.3715
		48.0667	11408.9	19295	34.5982	18413.7	30.047	-5.40233	18093.4	28.572	-4.90834	18060.4	28.4245	-7.53981	18083.9	28.5295	-8.54028	17970	28.0238	-9.75537	17730.9	26.9896	-10.6011	17503.6	26.0382	-10.5792
		48.1333	11476.7	19227.7	34.2187	18380.6	29.8908	-5.17896	18025.4	28.2684	-4.83241	18047.2	28.3655	-7.21928	18060.9	28.4268	-8.26351	18020.2	28.2455	-9.15414	17735.5	27.0089	-10.2023	17453.6	25.8327	-10.4052
		48.2	11423.6	19246.6	34.3244	18402.2	29.9928	-5.1827	17978.6	28.0616	-5.14485	18130	28.7365	-6.95395	18036.8	28.3191	-8.47683	18057	28.4091	-9.0962	17757.9	27.1043	-10.2126	17477.1	25.9293	-10.4143
		48.2667	11357.8	19188.5	34.0004	18393.6	29.9522	-4.89926	18038.3	28.3257	-4.55685	18109.8	28.6455	-6.72106	18098.1	28.5931	-7.87888	17926.2	27.8316	-9.34973	17768.4	27.1495	-9.84344	17500.6	26.026	-9.99365
		48.3333	11461.8	19161.3	33.8503	18369.5	29.8388	-4.86256	17962.8	27.9918	-4.74059	18087.1	28.5436	-6.67284	18045.4	28.3574	-7.96445	17974.7	28.0445	-8.98678	17750.5	27.0731	-9.76973	17454.6	25.8368	-10.0327
		48.4	11440	19269.7	34.4548	18403.8	30.0002	-5.30564	18043.9	28.351	-4.98593	18126.4	28.7203	-7.10058	18017.3	28.2327	-8.6936	18033.2	28.3031	-9.33264	17674.8	26.752	-10.6953	17432.6	25.747	-10.727
		48.4667	11436.5	19230.6	34.2349	18346	29.7287	-5.35727	17997.4	28.1444	-4.97261	18077.2	28.4993	-7.10174	18124.5	28.7119	-7.99452	18032.6	28.3004	-9.11547	17738.9	27.0237	-10.2037	17494.4	26.0005	-10.2536
		48.5333	11431.5	19206.6	34.1011	18382.9	29.9017	-5.05045	18010	28.2004	-4.78278	18054.3	28.397	-7.07017	18053.5	28.3937	-8.179	18023.9	28.2619	-9.02017	17716.2	26.9271	-10.1665	17380.2	25.5336	-10.5867
		48.6	11412.8	19232.5	34.2454	18433.5	30.1409	-4.95561	18053.7	28.3945	-4.73295	18077.3	28.4998	-7.11172	18042.1	28.3429	-8.37403	17966.3	28.0074	-9.41892	17806.1	27.3107	-9.92716	17455.1	25.8391	-10.4255
		48.6667	11427	19324.3	34.7654	18411.3	30.0359	-5.58056	18031.1	28.2939	-5.35359	17958.1	27.9715	-8.16002	18076.3	28.4956	-8.74135	17955.7	27.9608	-9.98555	17723.2	26.9566	-10.8013	17378.8	25.5281	-11.2565
		48.7333	11412.1	19172.9	33.9141	18310.7	29.5642	-5.20098	17950.8	27.9392	-4.85702	18051.4	28.3842	-6.896	17997.2	28.1435	-8.24215	18039	28.329	-8.76597	17708.4	26.8939	-10.0127	17450.4	25.8197	-10.1135
		48.8	11389.5	19251.2	34.3506	18336.4	29.6837	-5.51794	17993.9	28.129	-5.10365	18073.9	28.4846	-7.2321	18060.5	28.4247	-8.39751	18002.3	28.166	-9.36558	17684.8	26.7942	-10.5489	17408.5	25.6487	-10.7211
		48.8667	11404.2	19188	33.9977	18378.6	29.8817	-4.96708	17934.6	27.8684	-5.01137	17996.4	28.1402	-7.22353	18064.9	28.4442	-8.02503	17959	27.9752	-9.20345	17686.1	26.7995	-10.1907	17424.7	25.7145	-10.3024
		48.9333	11379.7	19218.1	34.165	18378.7	29.8819	-5.13419	17959.9	27.9792	-5.06796	18072.9	28.48	-7.05112	18043.2	28.3476	-8.28905	18006.6	28.1852	-9.16079	17652.1	26.6563	-10.5013	17466.1	25.884	-10.3002
		49	11426	19228.9	34.2256	18346.3	29.73	-5.3467	17994	28.1293	-4.97837	18042.8	28.3459	-7.24583	18013.7	28.2165	-8.48065	17972	28.0324	-9.37418	17727.3	26.9741	-10.244	17421.2	25.7004	-10.5444
		49.0667	11402.2	19289.9	34.5691	18383.4	29.9041	-5.51604	17976.5	28.0522	-5.39899	18040	28.3335	-7.6017	18053.4	28.393	-8.64765	17948.2	27.928	-9.82208	17683.6	26.7892	-10.7724	17404.6	25.6327	-10.9556
		49.1333	11391.1	19230.8	34.2358	18333.5	29.6704	-5.41651	17983	28.0808	-5.03708	18025.7	28.2698	-7.33207	18105.8	28.6276	-8.07979	17931.2	27.8535	-9.5632	17640.8	26.609	-10.6193	17411.7	25.6618	-10.5931
		49.2	11402.1	19190.3	34.0104	18375.6	29.8675	-4.99391	18065.9	28.4489	-4.44357	18016.3	28.2281	-7.14836	18023.4	28.2595	-8.22242	17966.7	28.009	-9.18225	17688	26.8075	-10.1953	17402.2	25.623	-10.4066
		49.2667	11457.7	19231.2	34.2382	18377.5	29.8766	-5.21265	17971	28.0281	-5.09221	18033.6	28.3051	-7.29914	18066.2	28.4503	-8.25942	17951.9	27.9442	-9.47489	17695.1	26.8377	-10.393	17401.4	25.6198	-10.6375
		49.3333	11416.8	19223.2	34.1938	18437.3	30.159	-4.88588	18020.4	28.2464	-4.82946	18015.6	28.225	-7.33488	17975.3	28.0468	-8.61852	17927.1	27.8352	-9.5395	17661.3	26.6952	-10.4911	17436.5	25.7628	-10.4502
		49.4	11440.4	19177.2	33.9379	18373	29.8551	-4.93386	17988.6	28.1056	-4.71433	18067.6	28.4565	-6.84744	18030.8	28.2924	-8.11705	17953.7	27.9521	-9.16667	17672.3	26.7413	-10.1891	17322.7	25.3012	-10.6559
		49.4667	11364.6	19179.8	33.9527	18396	29.9632	-4.8405	18008.1	28.1918	-4.64299	18000.1	28.1563	-7.16249	18096.5	28.5859	-7.83829	18002.9	28.1688	-8.96483	17704.2	26.8761	-10.0691	17360.2	25.4528	-10.5191
		49.5333	11401	19260.3	34.4015	18354.8	29.7699	-5.48261	18028.2	28.2809	-5.00264	18024.3	28.2636	-7.50397	17999.4	28.1533	-8.71975	17977.6	28.0573	-9.5251	17632.3	26.573	-10.821	17348.5	25.4056	-11.0151
		49.6	11412	19292.1	34.5817	18358.9	29.7893	-5.64354	17991.4	28.1182	-5.34566	18044.9	28.3554	-7.59237	18045.9	28.3596	-8.6937	17945.8	27.9171	-9.84555	17706.3	26.885	-10.6893	17351.8	25.4188	-11.1821
		49.6667	11411.5	19190.6	34.0124	18358.7	29.7881	-5.07537	18032.4	28.2995	-4.59505	18021.7	28.2521	-7.12641	17981.3	28.0734	-8.41059	17957.6	27.9693	-9.22405	17697.9	26.8493	-10.1556	17358.4	25.4454	-10.5862
		49.7333	11417.4	19208.4	34.1109	18344.6	29.7224	-5.23965	18000.8	28.1593	-4.83372	18044.9	28.3554	-7.12166	18014.8	28.2215	-8.36097	17919.4	27.8019	-9.48999	17614.6	26.4991	-10.6044	17394.6	25.5922	-10.538
		49.8	11374.7	19169.2	33.8937	18311.3	29.5671	-5.17767	17940.3	27.8933	-4.88252	18100.8	28.6054	-6.6544	18037.2	28.321	-8.04426	17935.8	27.8735	-9.20115	17666.5	26.7168	-10.1694	17374.3	25.5097	-10.4032
		49.8667	11403.1	19151.7	33.7976	18350.4	29.7494	-4.89934	17988.4	28.1048	-4.5749	18010.8	28.2038	-6.95987	18027.9	28.2796	-7.9896	17960	27.9796	-8.99891	17639.5	26.6033	-10.1869	17335	25.351	-10.4658
		49.9333	11398.4	19236.4	34.2673	18321.9	29.616	-5.50235	18026.1	28.2717	-4.87772	18085	28.5344	-7.09897	17996	28.1382	-8.60067	17933.4	27.8627	-9.58547	17642.5	26.6161	-10.6436	17422.3	25.7049	-10.5816
		50	11434.3	19236.9	34.2699	18336.6	29.6846	-5.43636	17919.9	27.8037	-5.34829	18009	28.1957	-7.44036	18050	28.3778	-8.3637	18041.1	28.3383	-9.11253	17781.7	27.206	-10.0564	17342.7	25.3819	-10.9072
		50.0667	11385.4	19245.1	34.3164	18324.4	29.6278	-5.5397	17918.6	27.7982	-5.40025	18079.8	28.511	-7.17151	18002.6	28.1676	-8.6204	17961.8	27.9876	-9.50969	17722	26.9518	-10.3571	17351.8	25.4189	-10.9167
		50.1333	11413.7	19201.2	34.0707	18397	29.9683	-4.95346	18032.8	28.3014	-4.65144	18023.1	28.2582	-7.17865	17988.4	28.1047	-8.43761	17921.2	27.8096	-9.44209	17726	26.9684	-10.0948	17379.4	25.5306	-10.5593
		50.2	11353.1	19238.7	34.2801	18366.8	29.8261	-5.30503	17985.6	28.0924	-5.06977	17972.1	28.0329	-7.61331	17979.8	28.0668	-8.68484	17925.7	27.8294	-9.6316	17669.7	26.7302	-10.5424	17366.7	25.4789	-10.8204
		50.2667	11427.3	19120.9	33.6293	18325.2	29.6317	-4.84867	17952.6	27.9469	-4.56443	18008.2	28.1923	-6.80306	17983.7	28.0842	-8.01664	17898.3	27.7097	-9.10053	17636.7	26.5917	-10.03	17371.9	25.5001	-10.1483
		50.3333	11396.2	19226.6	34.2123	18280.5	29.4241	-5.63933	17963.9	27.9967	-5.09773	18009.6	28.1983	-7.38015	18029.6	28.287	-8.39686	17944.3	27.9108	-9.48242	17661.9	26.6973	-10.5075	17323.6	25.3049	-10.9266
		50.4	11399	19190.3	34.0103	18384.6	29.91	-4.95145	18005.5	28.1803	-4.71217	17979.9	28.0672	-7.30928	17982	28.0767	-8.40525	17943.5	27.907	-9.28426	17605	26.4587	-10.5441	17310.2	25.2509	-10.7786
		50.4667	11384.8	19207.1	34.1036	18330.8	29.6577	-5.29694	17951.9	27.944	-5.04167	17966.5	28.0084	-7.46129	18054.6	28.3983	-8.17678	17879.4	27.6273	-9.65719	17584.7	26.3742	-10.7219	17322.6	25.301	-10.8217
		50.5333	11400.8	19256.5	34.3803	18340.9	29.705	-5.52636	18024.7	28.2652	-4.99717	17980.6	28.0703	-7.6761	18006.3	28.1837	-8.66823	17936	27.8742	-9.68708	17628.5	26.5571	-10.8158	17337.9	25.3627	-11.0368
		50.6	11392.9	19245.4	34.3177	18412.3	30.0405	-5.12829	17953.7	27.9518	-5.24801	17993.4	28.1266	-7.55724	18011.9	28.2088	-8.58049	17903.3	27.7316	-9.76711	17648.6	26.6417	-10.6686	17329.6	25.3291	-11.0078
		50.6667	11398.2	19182.5	33.9671	18410.1	30.03	-4.78818	17912.4	27.7714	-5.0778	17994	28.1293	-7.20383	18024.7	28.2655	-8.17314	17843	27.4698	-9.67821	17621.8	26.5293	-10.4303	17403.8	25.6295	-10.3568
		50.7333	11451.4	19173.6	33.9184	18356.6	29.7783	-4.99119	17889.9	27.6733	-5.12719	17976.3	28.0512	-7.2333	17953.1	27.9493	-8.44062	17907.4	27.7492	-9.35015	17642.6	26.6165	-10.2944	17265.6	25.0722	-10.8654
		50.8	11401.8	19214.9	34.1474	18355.4	29.7725	-5.22603	17953.2	27.9498	-5.07973	17944.1	27.9098	-7.6037	17968.2	28.0155	-8.60348	17899.2	27.7137	-9.61464	17632.6	26.5746	-10.5653	17342.9	25.383	-10.7836
		50.8667	11404.3	19245.7	34.3195	18281.3	29.4279	-5.74274	17922.1	27.8135	-5.38815	18000.6	28.1586	-7.52706	18016.4	28.2285	-8.56261	17825.9	27.396	-10.1044	17663.1	26.7027	-10.6093	17319.6	25.289	-11.0498
		50.9333	11416.6	19272	34.4678	18336.7	29.6853	-5.63354	17898.8	27.712	-5.63788	18009.3	28.1972	-7.63667	18010	28.2001	-8.73921	17879.2	27.6265	-10.0222	17649.8	26.6467	-10.8135	17350.2	25.4123	-11.0747
		51	11395.7	19204	34.0867	18363.7	29.8118	-5.12596	18018.6	28.2383	-4.73045	17991.4	28.1179	-7.33484	17973.6	28.0393	-8.51893	17863.1	27.5568	-9.71079	17627.3	26.5523	-10.5269	17298.4	25.2036	-10.9022
		51.0667	11417.3	19252.4	34.3571	18335.9	29.6817	-5.52643	17938.2	27.8838	-5.35531	18060.5	28.4248	-7.29835	18016.6	28.2293	-8.59927	17939	27.8874	-9.65054	17648.8	26.6424	-10.7072	17296.7	25.1969	-11.1793
		51.1333	11430.2	19163.6	33.8632	18366.7	29.8256	-4.88861	17902.9	27.7299	-5.01538	17989	28.1074	-7.12186	17994.9	28.1333	-8.20138	17843.1	27.4701	-9.574	17585.9	26.3792	-10.4764	17287.1	25.1585	-10.7239
		51.2	11399	19161.4	33.8511	18336	29.6821	-5.02008	17859.5	27.5411	-5.19207	17933.6	27.8638	-7.35338	18012.1	28.2096	-8.11299	17869.1	27.5827	-9.44927	17660.4	26.6912	-10.1524	17271.2	25.0948	-10.7754
		51.2667	11405.9	19228.4	34.2228	18317.4	29.5953	-5.47854	17915.4	27.7844	-5.32048	17992.1	28.1211	-7.46776	18014.9	28.2219	-8.47251	17943.5	27.9073	-9.49646	17619.4	26.5193	-10.696	17283.7	25.1448	-11.0972
		51.3333	11400.8	19169.9	33.8977	18321.9	29.6161	-5.13264	17925	27.826	-4.95376	17942.8	27.9042	-7.35952	18075.6	28.4925	-7.87677	17918.5	27.7979	-9.28069	17533.1	26.1601	-10.7301	17282.5	25.14	-10.7768
		51.4	11398.4	19210.8	34.1243	18291.5	29.4751	-5.50025	17941.3	27.8977	-5.10867	17914.8	27.7817	-7.70868	17975.3	28.0468	-8.54903	17912.8	27.7728	-9.53243	17582	26.3631	-10.7537	17267.7	25.0808	-11.0627
		51.4667	11365.5	19242.8	34.3034	18313.1	29.5753	-5.57917	17944.8	27.9129	-5.27261	17950.7	27.9388	-7.73071	17964.6	28	-8.77492	17925.3	27.8276	-9.65666	17566.1	26.2968	-10.999	17287.4	25.1595	-11.1631
		51.5333	11431.7	19177.4	33.9389	18364.2	29.8141	-4.97592	17972.7	28.0355	-4.78548	18003.3	28.1707	-7.1343	18038	28.3243	-8.08615	17872	27.5954	-9.52443	17592.2	26.4056	-10.5258	17285.5	25.152	-10.8061
		51.6	11375.9	19295.8	34.6026	18315.6	29.5871	-5.86658	17954.7	27.9563	-5.52837	17959.6	27.9777	-7.991	17946.1	27.9185	-9.15567	17826.1	27.3969	-10.3866	17650.7	26.6505	-10.9446	17300.3	25.2114	-11.4104
		51.6667	11361.7	19162.5	33.8573	18304.9	29.5373	-5.17108	17930.6	27.8507	-4.88871	17940.2	27.8926	-7.33082	17933.1	27.8615	-8.46732	17867.8	27.5773	-9.4609	17631.4	26.5692	-10.2805	17277.8	25.1212	-10.7552
		51.7333	11395.4	19200.3	34.066	18273.9	29.3937	-5.52338	17886.4	27.658	-5.29011	17940.5	27.8939	-7.53828	17980.1	28.0681	-8.46953	17893.3	27.6879	-9.55905	17604.3	26.4558	-10.6027	17285.5	25.1519	-10.9334
		51.8	11400	19199.4	34.0611	18382.3	29.8988	-5.01343	17918.3	27.7968	-5.14642	17938.5	27.8852	-7.54205	17932.5	27.8591	-8.6736	17874.6	27.6065	-9.63561	17627.6	26.5533	-10.5004	17304.7	25.2288	-10.8515
		51.8667	11378.3	19278.6	34.5048	18319.2	29.6037	-5.75216	17912.4	27.7712	-5.61573	17974.2	28.0422	-7.82871	17955.6	27.9602	-9.01612	17837.8	27.4474	-10.2383	17615	26.5005	-10.9968	17329.3	25.3281	-11.1959
		51.9333	11424.1	19213.7	34.1406	18395.7	29.9619	-5.02974	17870.8	27.5902	-5.43252	17927.7	27.8378	-7.66887	17952.9	27.9484	-8.66372	17864.5	27.5631	-9.75845	17572	26.3212	-10.8119	17334.7	25.3497	-10.8101
		52	11448.6	19223	34.1923	18276.3	29.4049	-5.63842	17984.6	28.0879	-4.98642	17972.5	28.0347	-7.52368	18012.9	28.2132	-8.45063	17836.2	27.4407	-9.93253	17644.1	26.6228	-10.562	17338.2	25.364	-10.8475
		52.0667	11404.1	19293.1	34.5871	18307.4	29.5488	-5.88935	17967.2	28.0111	-5.45813	17905	27.739	-8.21417	18052.4	28.3886	-8.67007	17848.2	27.4922	-10.2758	17576.3	26.3392	-11.2404	17242.2	24.979	-11.6273
		52.1333	11408	19214.5	34.1451	18320.3	29.6087	-5.38749	17883.5	27.6451	-5.38212	17951.7	27.9431	-7.56815	17939.4	27.8894	-8.72727	17864.4	27.5622	-9.76382	17610	26.4798	-10.6578	17299.6	25.2086	-10.9557
		52.2	11426.6	19199.7	34.0629	18360.1	29.7948	-5.1192	17920.8	27.808	-5.13701	17986.1	28.0944	-7.33459	17988	28.1029	-8.43156	17817.3	27.3588	-9.88498	17599.8	26.4371	-10.6183	17282.5	25.1399	-10.9422
		52.2667	11406.4	19265	34.4283	18347.3	29.7347	-5.54463	17882	27.6387	-5.6717	17929.7	27.8467	-7.9477	17960.5	27.982	-8.9178	17854.4	27.5189	-10.0903	17610.1	26.4802	-10.9406	17263.7	25.0646	-11.3829
		52.3333	11443.2	19261.9	34.4109	18303.5	29.5309	-5.73112	17866.4	27.5712	-5.72178	17948	27.9268	-7.85016	17920.5	27.8066	-9.07581	17847.4	27.4887	-10.1031	17537.2	26.1771	-11.2263	17303.2	25.223	-11.207
		52.4	11421	19219.5	34.1727	18312.6	29.5728	-5.45095	17881.6	27.6371	-5.4177	17955.7	27.9608	-7.578	17916.8	27.7905	-8.85374	17809.5	27.3253	-10.0283	17570	26.3131	-10.8521	17339.5	25.3689	-10.823
		52.4667	11370.4	19198.9	34.0582	18255	29.3063	-5.60292	17897.5	27.7064	-5.2339	17907.5	27.75	-7.67428	17956.8	27.9654	-8.56435	17836.8	27.4431	-9.79605	17521.8	26.1134	-10.9372	17266.2	25.0749	-11.0025
		52.5333	11409.8	19198.1	34.0538	18272.6	29.3874	-5.51747	17897.3	27.7053	-5.23056	17941.4	27.8978	-7.5221	17960.6	27.9823	-8.54309	17858.7	27.5376	-9.69716	17568	26.3046	-10.7417	17246.3	24.9951	-11.0779
		52.6	11375	19185.3	33.9829	18340.5	29.703	-5.131	17836.4	27.4415	-5.42353	17937.7	27.8817	-7.46728	17942.4	27.9025	-8.55197	17771.9	27.1641	-9.9997	17566.2	26.2973	-10.6781	17253.8	25.0253	-10.9768
		52.6667	11411.8	19247	34.3266	18295.2	29.4922	-5.68546	17936.5	27.8764	-5.33222	17927.5	27.8372	-7.85544	17959.1	27.9755	-8.8226	17782.7	27.2105	-10.297	17583.3	26.3685	-10.9506	17287	25.1579	-11.1879
		52.7333	11396.4	19159.9	33.8428	18289.2	29.4643	-5.22954	17863.2	27.5571	-5.16775	17948.5	27.9291	-7.27979	17931.2	27.8534	-8.46097	17873.2	27.6007	-9.42301	17528	26.1388	-10.6965	17296.5	25.1962	-10.6658
		52.8	11388.5	19132.3	33.6915	18291	29.4728	-5.06978	17900.4	27.7189	-4.85473	17916.3	27.7884	-7.26926	17890.6	27.6762	-8.48694	17847	27.487	-9.38544	17530.5	26.1491	-10.535	17266.7	25.0767	-10.6341
		52.8667	11401.9	19242.6	34.3023	18288.4	29.4608	-5.69265	17854.4	27.5191	-5.66532	17913.5	27.776	-7.89242	17920.3	27.8056	-8.96828	17828.6	27.4076	-10.0757	17533.7	26.1623	-11.1326	17309.9	25.2498	-11.0718
		52.9333	11398.5	19191.7	34.0182	18319.7	29.6058	-5.2635	17870.3	27.5878	-5.3125	17924.5	27.8242	-7.56014	17891	27.6781	-8.81168	17846.4	27.4845	-9.71464	17582.1	26.3633	-10.6474	17209.8	24.8499	-11.1875
		53	11372.3	19170.7	33.9021	18235.6	29.2174	-5.5358	17851	27.5044	-5.27973	17913	27.7736	-7.49453	17889.6	27.672	-8.70166	17856.5	27.5282	-9.55479	17518.2	26.0985	-10.796	17266.6	25.0764	-10.8448
		53.0667	11385.4	19172.2	33.9105	18222.4	29.1567	-5.6048	17828.3	27.4065	-5.38611	18015.6	28.2249	-7.05165	17927.3	27.8362	-8.54587	17836.1	27.4401	-9.65125	17531.5	26.1534	-10.7496	17256.1	25.0344	-10.8952
		53.1333	11385.7	19164.9	33.8704	18316.9	29.5929	-5.12852	17819.6	27.3687	-5.38375	17904.4	27.7361	-7.5004	17924.6	27.8244	-8.51758	17808	27.3188	-9.73246	17498.9	26.0186	-10.8443	17291.2	25.1746	-10.715
		53.2	11417.8	19219.7	34.1738	18270.9	29.3796	-5.64524	17849.4	27.4975	-5.55845	17881.6	27.6371	-7.90283	17937.6	27.8815	-8.76382	17859	27.539	-9.81574	17536.4	26.1737	-10.9926	17310.8	25.2534	-10.9396
		53.2667	11389.6	19193.4	34.0275	18339	29.6958	-5.18269	17947.6	27.9253	-4.98424	17876.9	27.6166	-7.77695	17970.9	28.0274	-8.47161	17788.6	27.2357	-9.97265	17503.2	26.0365	-10.9835	17245.9	24.9938	-11.0528
		53.3333	11405.8	19263.4	34.4193	18331.9	29.6629	-5.60741	17899	27.7128	-5.58853	17920.8	27.8081	-7.97729	17913.1	27.7742	-9.11666	17848.4	27.4931	-10.1071	17489.3	25.9794	-11.4324	17299	25.2062	-11.2322
		53.4	11400.5	19216.3	34.1548	18296.7	29.499	-5.50681	17963.5	27.9951	-5.04174	17961.1	27.9845	-7.53632	17925.6	27.8289	-8.79747	17821.5	27.377	-9.95869	17489.5	25.9799	-11.1673	17208.2	24.8435	-11.3304
		53.4667	11394.8	19225	34.2037	18261.5	29.3362	-5.7186	17888.1	27.6651	-5.42065	17890.4	27.6752	-7.89462	17890.9	27.6775	-8.99782	17829.2	27.4102	-9.97439	17464.6	25.878	-11.3182	17258	25.0417	-11.1812
		53.5333	11364.8	19185.5	33.9839	18256.3	29.3126	-5.52243	17872.5	27.5975	-5.26851	17869.2	27.5832	-7.76681	17914.5	27.7805	-8.67494	17777.2	27.1871	-9.97779	17478.6	25.9353	-11.0411	17205.1	24.8313	-11.1718
		53.6	11364.7	19206.2	34.0987	18273.7	29.3928	-5.55705	17825	27.392	-5.58879	17894.5	27.6932	-7.7716	17924.4	27.8237	-8.74665	17768.6	27.15	-10.1297	17519.1	26.1022	-10.989	17289.1	25.1665	-10.9514
		53.6667	11415	19175.2	33.9268	18301.9	29.5234	-5.2545	17866.8	27.5728	-5.23612	17873.1	27.6002	-7.69268	17932.2	27.8579	-8.5405	17821.8	27.3783	-9.72941	17460.5	25.861	-11.0583	17300.2	25.2108	-10.7351
		53.7333	11414.6	19217.3	34.1604	18234.5	29.2124	-5.79902	17897.8	27.7074	-5.33505	17880.1	27.6304	-7.89601	17891.9	27.682	-8.94996	17796	27.2675	-10.0738	17502.2	26.0324	-11.1205	17218.3	24.8837	-11.2959
		53.8	11399.2	19211.5	34.1281	18325.4	29.6328	-5.34644	17843.2	27.4707	-5.5395	17955.7	27.9606	-7.53364	17906.3	27.7445	-8.85523	17793.5	27.2566	-10.0524	17479.5	25.9392	-11.1815	17267.3	25.079	-11.0683
		53.8667	11363.2	19237.5	34.2734	18322.5	29.6192	-5.50525	17821.4	27.3767	-5.77879	17952	27.9447	-7.69477	17995.8	28.1373	-8.60763	17771	27.1602	-10.2941	17509.2	26.0614	-11.2044	17273.8	25.1053	-11.1873
		53.9333	11352.6	19244.4	34.3122	18214.8	29.1221	-6.0412	17912	27.7693	-5.42504	17898.6	27.7111	-7.96722	17890.1	27.6738	-9.10999	17811.8	27.3353	-10.1578	17489.6	25.9805	-11.3242	17178.2	24.7249	-11.6065
		54	11415.2	19181.5	33.9621	18297.9	29.5049	-5.30827	17873.8	27.6033	-5.24088	17925.9	27.8301	-7.4981	17906.4	27.7452	-8.68849	17870.2	27.5875	-9.55554	17483.8	25.9568	-10.9977	17271.3	25.0952	-10.8861
		54.0667	11420.5	19232.5	34.2457	18294.7	29.4897	-5.60703	17878.5	27.6237	-5.50411	17864	27.5606	-8.05114	17910.2	27.7614	-8.9558	17802.7	27.2962	-10.1304	17528.4	26.1406	-11.0976	17189.3	24.7687	-11.4961
		54.1333	11380.9	19184.4	33.9778	18314.4	29.5812	-5.24768	17840.4	27.4587	-5.40122	17839.5	27.4549	-7.88904	17890.2	27.6746	-8.77478	17794	27.2587	-9.9	17448.8	25.8133	-11.157	17209.1	24.8471	-11.1499
		54.2	11408	19198.5	34.0562	18256.6	29.3138	-5.59346	17828.6	27.4078	-5.53041	17875.2	27.6094	-7.81281	17885.5	27.6541	-8.87359	17768.3	27.1488	-10.0883	17495.3	26.004	-11.0446	17228.8	24.9254	-11.1499
		54.2667	11418.8	19220.9	34.1807	18261.4	29.336	-5.6958	17882.4	27.6407	-5.42212	17878	27.6216	-7.92522	17836.3	27.4408	-9.21152	17745.5	27.0516	-10.3101	17469.7	25.8989	-11.2743	17204.2	24.8279	-11.372
		54.3333	11404.4	19208	34.1086	18269.1	29.3716	-5.58807	17875.2	27.6092	-5.38153	17872.3	27.5965	-7.87819	17935.3	27.8713	-8.7089	17753.7	27.0867	-10.2029	17508.7	26.0593	-11.0418	17262.2	25.0587	-11.0691
		54.4	11433	19172.1	33.9101	18200.3	29.0558	-5.70539	17835	27.4355	-5.3567	17868.1	27.5786	-7.69764	17830.2	27.4145	-8.96713	17793.8	27.2581	-9.83292	17472.4	25.9099	-10.9927	17187.4	24.7612	-11.1681
		54.4667	11428.3	19145.1	33.7615	18197.5	29.0428	-5.56978	17812.7	27.339	-5.30457	17945.4	27.9154	-7.21218	17908.1	27.7524	-8.48066	17785.5	27.2224	-9.72	17429.6	25.7345	-11.0195	17178.2	24.7247	-11.056
		54.5333	11413.8	19136.7	33.7152	18185.9	28.9898	-5.57641	17838.6	27.4507	-5.14655	17909.9	27.7604	-7.32085	17888.3	27.6663	-8.52043	17770.1	27.1565	-9.73959	17502.1	26.032	-10.6756	17213.8	24.866	-10.8684
		54.6	11440.5	19211.6	34.1287	18248.2	29.2752	-5.70462	17868.1	27.5786	-5.43218	17908.6	27.7545	-7.74031	17894.7	27.6942	-8.90613	17803.1	27.2981	-10.0116	17432.5	25.7467	-11.3746	17263.1	25.0622	-11.0857
		54.6667	11419.1	19208.5	34.1118	18305.5	29.5399	-5.42296	17820.5	27.3726	-5.62127	17843.6	27.4723	-8.00555	17898.8	27.7121	-8.87125	17805.5	27.3085	-9.98422	17482.1	25.9495	-11.1548	17242	24.9782	-11.1528
		54.7333	11471.8	19154.6	33.8134	18236.1	29.2194	-5.44504	17870.9	27.5907	-5.10475	17899	27.7126	-7.46691	17842	27.4653	-8.81961	17817.3	27.3592	-9.63512	17441	25.7812	-11.0246	17195.3	24.7927	-11.0399
		54.8	11420.8	19176.3	33.9332	18247.9	29.2736	-5.51062	17863.3	27.5575	-5.25781	17926.1	27.8309	-7.46833	17893.4	27.6885	-8.71624	17763.7	27.1291	-9.98502	17454.4	25.8359	-11.0898	17178.9	24.7277	-11.2246
		54.8667	11410.9	19221.6	34.1848	18264.8	29.3515	-5.68444	17836.6	27.442	-5.6249	17857	27.5305	-8.02041	17860.8	27.5467	-9.10969	17773.2	27.1699	-10.1959	17433.7	25.7514	-11.426	17177.5	24.7221	-11.4819
		54.9333	11404.5	19135.2	33.7075	18247.7	29.273	-5.28554	17826.8	27.3999	-5.18972	17829.6	27.4121	-7.6615	17865.6	27.5675	-8.61159	17742.2	27.0375	-9.85092	17480.1	25.9415	-10.7584	17197.2	24.8	-10.9266
		55	11400	19226.6	34.2124	18325.5	29.6329	-5.43067	17858	27.5345	-5.56005	17870.7	27.5896	-7.9889	17884.4	27.6491	-9.03489	17793.4	27.2562	-10.1371	17450.9	25.8217	-11.3832	17223.5	24.9046	-11.3271
		55.0667	11417.5	19264.4	34.4246	18274.6	29.3969	-5.87875	17885	27.6516	-5.6551	17882.2	27.6398	-8.15091	17907	27.7477	-9.14846	17744	27.045	-10.5605	17472.3	25.9096	-11.5075	17187.5	24.7616	-11.6822
		55.1333	11418.5	19214.2	34.1435	18211.4	29.1065	-5.88807	17868.8	27.5813	-5.44431	17854.1	27.5177	-7.99189	17872.3	27.5967	-9.0184	17743.9	27.0449	-10.2795	17425.6	25.7183	-11.4177	17230.9	24.9339	-11.2287
		55.2	11438.3	19187.6	33.9955	18292.1	29.4776	-5.36895	17901.1	27.7221	-5.15549	17852.4	27.5103	-7.85133	17843	27.4697	-8.99736	17735.2	27.0079	-10.1685	17402.7	25.6251	-11.3629	17237.4	24.9598	-11.0549
		55.2667	11429.5	19134.6	33.7042	18256.3	29.3126	-5.24271	17847.6	27.4899	-5.09638	17769.4	27.1537	-7.91659	17818.9	27.3658	-8.80996	17730.6	26.9882	-9.89695	17422.7	25.7064	-10.9903	17181.5	24.738	-10.9854
		55.3333	11427	19186.2	33.9878	18283.6	29.4383	-5.40056	17859.8	27.5425	-5.32734	17874.3	27.6054	-7.74843	17827.3	27.4023	-9.05706	17727.5	26.9751	-10.1936	17463.7	25.8743	-11.106	17152.5	24.6234	-11.3835
		55.4	11396.6	19146.8	33.7708	18255	29.3066	-5.31526	17845.1	27.479	-5.1739	17841.5	27.4635	-7.67345	17920.4	27.8059	-8.4365	17765.6	27.1375	-9.81429	17399.7	25.613	-11.1503	17177.5	24.7222	-11.0678
		55.4667	11380.6	19168.8	33.8915	18233.1	29.2057	-5.53695	17801.5	27.291	-5.48263	17844	27.474	-7.78362	17886.2	27.6571	-8.70605	17737.1	27.0158	-10.0567	17432.2	25.7454	-11.1386	17164.8	24.6718	-11.2389
		55.5333	11407.4	19146.7	33.7703	18234.8	29.2134	-5.40791	17815	27.349	-5.30333	17856.6	27.5285	-7.60785	17865.1	27.5657	-8.67616	17735	27.0069	-9.9443	17407	25.6426	-11.1202	17134.5	24.5524	-11.2371
		55.6	11386.2	19175.2	33.9269	18180.6	28.9659	-5.81203	17836.6	27.4422	-5.36678	17799	27.2803	-8.01266	17848.9	27.4951	-8.90331	17722.1	26.9521	-10.1557	17422.3	25.7047	-11.2146	17159.4	24.6507	-11.2953
		55.6667	11384.3	19165.5	33.8733	18227	29.1778	-5.54654	17817.7	27.3606	-5.39479	17833.4	27.4283	-7.81107	17879.1	27.6261	-8.71877	17724.8	26.9634	-10.0908	17416.3	25.6806	-11.1852	17149.4	24.6113	-11.2811
		55.7333	11393.2	19200.4	34.0665	18273.2	29.3905	-5.52707	17771.4	27.1621	-5.78654	17863.6	27.5589	-7.87374	17799.5	27.2824	-9.25561	17742.1	27.0369	-10.2105	17426.5	25.7219	-11.3371	17119.8	24.4949	-11.5908
		55.8	11417.7	19147.5	33.7744	18264.6	29.3508	-5.27476	17782.1	27.208	-5.44851	17849.7	27.499	-7.64156	17843.7	27.4727	-8.77328	17698.3	26.8512	-10.1041	17456.8	25.8461	-10.9209	17206.4	24.8367	-10.957
		55.8667	11427	19174.1	33.9208	18301.7	29.5225	-5.24941	17769.7	27.155	-5.64791	17875.6	27.6111	-7.67582	17864	27.5607	-8.83165	17726.5	26.9706	-10.1311	17403.8	25.6295	-11.2837	17112	24.4639	-11.4761
		55.9333	11392.7	19175	33.9261	18299.6	29.5124	-5.26483	17819.5	27.3686	-5.43962	17822.1	27.3796	-7.91266	17810.9	27.3315	-9.06618	17730	26.9855	-10.1216	17392.1	25.5822	-11.3365	17159	24.649	-11.2963
		56	11376.2	19141.1	33.7394	18239.8	29.2366	-5.35389	17846	27.4827	-5.13881	17895.2	27.6961	-7.40936	17842	27.4654	-8.74555	17677.4	26.7629	-10.1574	17374.7	25.5113	-11.2206	17134	24.5503	-11.2083
		56.0667	11428.6	19173.6	33.9179	18177.6	28.9523	-5.81671	17764.5	27.1328	-5.66726	17836.7	27.4426	-7.84138	17872.7	27.5985	-8.79101	17689.3	26.8129	-10.2859	17336.5	25.3569	-11.5535	17116	24.4799	-11.4572
		56.1333	11412.3	19227.1	34.2152	18176.4	28.9467	-6.11958	17751.5	27.0773	-6.02001	17804.8	27.3052	-8.27613	17846.2	27.4836	-9.20317	17725.4	26.9663	-10.4299	17414.4	25.6728	-11.5349	17148	24.6058	-11.6286
		56.2	11439.7	19148.8	33.7815	18256.6	29.3139	-5.31867	17823	27.3835	-5.28012	17824.5	27.3902	-7.75739	17808.2	27.3198	-8.93333	17633.1	26.5763	-10.3861	17383.4	25.5466	-11.2274	17087.4	24.3676	-11.4331
		56.2667	11417.4	19191.1	34.0149	18238.1	29.2287	-5.6373	17827.6	27.4034	-5.49356	17811.3	27.3331	-8.04793	17785.8	27.2239	-9.26259	17681.1	26.7787	-10.4171	17341.4	25.3766	-11.6308	17122.3	24.5045	-11.5295
		56.3333	11369.5	19138.8	33.7271	18190.2	29.0097	-5.56855	17805.2	27.307	-5.30226	17768	27.1476	-7.94562	17821	27.3751	-8.82361	17692	26.8247	-10.0834	17384.7	25.552	-11.1677	17117.3	24.4851	-11.2613
		56.4	11398	19176.7	33.9352	18228.5	29.1847	-5.60162	17767	27.1435	-5.67388	17840.4	27.4584	-7.84294	17787.5	27.2312	-9.17559	17715.6	26.9243	-10.1919	17366.9	25.48	-11.4478	17110.8	24.4592	-11.4952
		56.4667	11404.7	19157.8	33.8313	18181	28.9677	-5.71468	17860.8	27.5467	-5.16667	17811	27.3318	-7.8656	17822.6	27.3819	-8.92104	17735.4	27.0084	-10.0039	17382.1	25.5412	-11.2826	17110.4	24.4576	-11.3929
		56.5333	11403.2	19151.3	33.7953	18153.9	28.8447	-5.80169	17761.7	27.1207	-5.55676	17796.8	27.2709	-7.89053	17823.8	27.387	-8.87986	17684	26.7906	-10.1857	17402.9	25.6257	-11.1621	17076.2	24.3238	-11.4907
		56.6	11406.8	19082.8	33.4224	18152.4	28.838	-5.43545	17781.6	27.2058	-5.09866	17842.5	27.4676	-7.32094	17810.4	27.3292	-8.56475	17669.6	26.7298	-9.87353	17372.6	25.5029	-10.9121	17103.8	24.4319	-11.0097
		56.6667	11416.5	19162.1	33.8549	18199.4	29.0514	-5.65454	17796.9	27.2713	-5.46563	17871.9	27.5951	-7.62585	17827.6	27.4035	-8.92289	17661.8	26.6972	-10.3386	17343.5	25.385	-11.4624	17056.9	24.2487	-11.6253
		56.7333	11365.5	19166.8	33.8807	18176.4	28.9468	-5.78499	17793.7	27.2577	-5.50518	17786	27.2245	-8.02234	17806.1	27.3109	-9.04141	17744.3	27.0465	-10.0152	17437.7	25.7676	-11.1057	17107.3	24.4455	-11.4544
		56.8	11416.6	19218.6	34.1676	18190.1	29.009	-6.00971	17785.6	27.2227	-5.82703	17846.3	27.4839	-8.04979	17814.6	27.3473	-9.29192	17703.4	26.8726	-10.476	17359.1	25.4481	-11.712	17062.8	24.2717	-11.9151
		56.8667	11364.4	19172.2	33.9106	18192.7	29.021	-5.74068	17745.2	27.0501	-5.7425	17784	27.216	-8.06066	17796.6	27.27	-9.11211	17710.5	26.9027	-10.1888	17348.5	25.4056	-11.4975	17068.2	24.2929	-11.6369
		56.9333	11421	19164.2	33.8664	18154.5	28.8475	-5.86997	17761.1	27.118	-5.6305	17798.6	27.2787	-7.95375	17742.7	27.0398	-9.29809	17719.3	26.9403	-10.107	17410.3	25.6562	-11.2027	17070.7	24.3027	-11.5829
		57	11427.1	19161.8	33.8532	18208.3	29.092	-5.61227	17765.1	27.1353	-5.59998	17811.3	27.3333	-7.88601	17836.1	27.4401	-8.88469	17722.1	26.9521	-10.0821	17358.8	25.4468	-11.3989	17093.2	24.3904	-11.482
		57.0667	11356.1	19189.6	34.0064	18196.3	29.0374	-5.8201	17789.9	27.2414	-5.64705	17791.1	27.2464	-8.1261	17830.1	27.4143	-9.0636	17686.3	26.8005	-10.3868	17312.5	25.2604	-11.7385	17088.4	24.3716	-11.6539
		57.1333	11391.8	19233	34.2484	18175.1	28.9408	-6.15873	17795.3	27.2647	-5.86587	17824	27.3879	-8.22667	17784.4	27.2179	-9.5021	17669.7	26.7302	-10.6992	17320.3	25.2919	-11.9491	17086.9	24.3657	-11.9019
		57.2	11366.8	19155.8	33.8201	18226.1	29.1737	-5.49744	17774.9	27.1773	-5.52491	17824.4	27.3896	-7.79658	17850.3	27.5014	-8.79021	17599.9	26.4376	-10.5634	17384.2	25.5498	-11.2628	17017.5	24.0956	-11.7437
		57.2667	11387.4	19194	34.031	18199	29.0499	-5.83218	17742.8	27.04	-5.87311	17818.2	27.3631	-8.03405	17775	27.1777	-9.32487	17702.9	26.8706	-10.3413	17346.6	25.3978	-11.6257	17023.7	24.1196	-11.9306
		57.3333	11385.4	19113.6	33.5894	18194	29.0269	-5.41353	17751.7	27.0781	-5.39337	17767.8	27.1466	-7.80892	17780.4	27.2007	-8.86023	17631.8	26.5712	-10.1991	17364.7	25.4707	-11.1112	17021.7	24.1116	-11.4969
		57.4	11407.1	19089.7	33.46	18202.6	29.0661	-5.24499	17776.9	27.1856	-5.15648	17855.4	27.5233	-7.30279	17832.1	27.4229	-8.50862	17685.9	26.7986	-9.84232	17304.4	25.2278	-11.2247	17025.2	24.1253	-11.3538
		57.4667	11335.5	19170.7	33.9019	18233	29.2055	-5.54748	17772.1	27.165	-5.61899	17739.8	27.0274	-8.24068	17793.8	27.2579	-9.11556	17702.4	26.8685	-10.2144	17312.6	25.2608	-11.6336	17086.1	24.3626	-11.5585
		57.5333	11392	19129.7	33.6773	18130.3	28.7379	-5.79049	17761	27.1176	-5.44186	17805.5	27.3082	-7.73517	17777	27.1861	-8.96277	17664.5	26.7084	-10.1499	17263.1	25.0622	-11.6076	17074.1	24.3156	-11.3809
		57.6	11395.1	19134.6	33.7041	18150.2	28.828	-5.72717	17720	26.943	-5.64325	17753.1	27.084	-7.98624	17746.1	27.054	-9.12167	17700.1	26.859	-10.0261	17306.7	25.2368	-11.4598	17038.1	24.1755	-11.5478
		57.6667	11384.6	19152.8	33.8038	18167.5	28.9064	-5.74848	17761.2	27.1184	-5.5675	17776.6	27.1843	-7.98562	17752.1	27.0796	-9.19576	17655.5	26.6708	-10.314	17369.7	25.4913	-11.305	17007.5	24.0568	-11.7662
		57.7333	11389.4	19225.6	34.2071	18144.2	28.8008	-6.25738	17745.4	27.051	-6.03816	17752.9	27.0832	-8.48998	17777.1	27.1864	-9.49224	17648.2	26.64	-10.748	17315.3	25.2715	-11.9281	17087.5	24.3681	-11.8582
		57.8	11333.3	19157.1	33.8275	18193.8	29.026	-5.65253	17758.6	27.1076	-5.60194	17842.9	27.4695	-7.72402	17759.6	27.1116	-9.18746	17567.4	26.3022	-10.7062	17329.8	25.33	-11.49	16981.2	23.9549	-11.8918
		57.8667	11369.2	19106.8	33.5527	18144.1	28.8004	-5.60335	17721.2	26.9481	-5.48672	17745.3	27.0507	-7.86811	17764.6	27.1329	-8.89136	17701	26.8627	-9.87094	17291.5	25.1758	-11.3694	16959.2	23.8699	-11.702
		57.9333	11330.7	19140.1	33.7339	18075	28.4896	-6.09546	17759.7	27.1123	-5.50377	17776	27.1819	-7.91818	17732.6	26.9967	-9.20878	17622	26.5301	-10.3847	17346.2	25.3959	-11.3305	17046.1	24.2067	-11.5464
		58	11345.6	19169.1	33.8936	18153.4	28.8423	-5.90236	17740.9	27.0318	-5.74382	17764.4	27.1324	-8.12729	17812.4	27.3381	-9.02701	17667.2	26.72	-10.3545	17383.5	25.5471	-11.339	16996.9	24.0155	-11.8973
		58.0667	11366.6	19146	33.7665	18186.3	28.9919	-5.62567	17674.5	26.7506	-5.89803	17781	27.2032	-7.92944	17700	26.8584	-9.37968	17686.4	26.801	-10.1464	17324.6	25.3091	-11.4499	17078.2	24.3319	-11.4538
		58.1333	11410.1	19159.8	33.8423	18119.6	28.6899	-6.00345	17725.6	26.9668	-5.75762	17780	27.199	-8.00942	17735.3	27.0081	-9.30577	17620.6	26.5243	-10.499	17360.1	25.4524	-11.3824	17114.3	24.4733	-11.3882
		58.2	11388.6	19113.8	33.5907	18234.5	29.2121	-5.22963	17747.5	27.0601	-5.41269	17761.7	27.1208	-7.836	17725.6	26.9668	-9.09545	17647.5	26.6368	-10.1348	17313.6	25.2646	-11.3186	17097.4	24.407	-11.2029
		58.2667	11375.6	19179.4	33.95	18153.7	28.8436	-5.95748	17725.1	26.9646	-5.86753	17742	27.0368	-8.27939	17724.4	26.962	-9.45959	17646.2	26.6314	-10.4996	17288.7	25.1648	-11.7777	16994.2	24.0051	-11.9641
		58.3333	11372	19127.5	33.6654	18109.9	28.6462	-5.87027	17798.5	27.2781	-5.26947	17743.1	27.0414	-7.9901	17776.3	27.183	-8.95398	17594.8	26.4163	-10.4301	17304.5	25.2281	-11.4299	17006.6	24.0533	-11.6314
		58.4	11388.8	19172.5	33.9122	18118.1	28.6828	-6.08039	17703.4	26.8728	-5.9215	17713.8	26.9169	-8.36131	17750	27.0706	-9.31313	17611.2	26.4848	-10.6083	17312.4	25.2597	-11.6449	17023.7	24.1194	-11.812
		58.4667	11381.3	19121.8	33.634	18147.6	28.8163	-5.6687	17694	26.8329	-5.68315	17725.9	26.9683	-8.03173	17723	26.9559	-9.14963	17692	26.8247	-9.99022	17312.6	25.2607	-11.3658	17050.2	24.2225	-11.4306
		58.5333	11380.7	19150.6	33.7915	18159.4	28.8697	-5.77279	17676.8	26.7602	-5.91336	17812.2	27.3369	-7.82062	17721.7	26.9505	-9.31253	17664.2	26.7072	-10.2652	17238.6	24.9645	-11.8194	17022.1	24.1132	-11.6974
		58.6	11375.8	19133.5	33.6977	18120.9	28.6954	-5.85334	17725.3	26.9654	-5.61434	17773.3	27.1703	-7.89349	17729.1	26.9817	-9.18759	17576.7	26.3408	-10.5378	17296.3	25.1951	-11.4951	17002.2	24.0362	-11.6807
		58.6667	11339.2	19152.8	33.8036	18184.7	28.9844	-5.67031	17782.7	27.2105	-5.47528	17704.5	26.8775	-8.29229	17764.8	27.1338	-9.14139	17673.4	26.7459	-10.2387	17298.8	25.2054	-11.5907	16989.6	23.9875	-11.8354
		58.7333	11329.5	19184.3	33.9773	18156.5	28.8565	-5.97189	17750.6	27.0735	-5.78593	17742.7	27.0395	-8.30393	17758.8	27.1081	-9.34073	17657.3	26.6781	-10.4801	17228.7	24.925	-12.0448	17015.7	24.0886	-11.9079
		58.8	11364.3	19172.8	33.9136	18118	28.6827	-6.08196	17727.9	26.9769	-5.81876	17688.9	26.8113	-8.4684	17704.5	26.8773	-9.50782	17659.4	26.6869	-10.4076	17298	25.2022	-11.7039	16998.7	24.0228	-11.91
		58.8667	11347.2	19134	33.7007	18162.1	28.8817	-5.67006	17691.5	26.8223	-5.76045	17731.3	26.9911	-8.0757	17736.5	27.0132	-9.15909	17644.6	26.6249	-10.2567	17371	25.4966	-11.1966	17038.8	24.178	-11.5419
		58.9333	11418.9	19171.1	33.9045	18141.9	28.7903	-5.96521	17698	26.8499	-5.93662	17643.2	26.6188	-8.65174	17741.1	27.0327	-9.34331	17620.6	26.5243	-10.5611	17348.8	25.4066	-11.4904	16969.6	23.91	-12.0136
		59	11351.5	19151.1	33.7943	18150	28.8272	-5.81818	17726.4	26.9704	-5.70593	17722.8	26.9552	-8.2052	17719.5	26.9411	-9.32472	17668.4	26.7248	-10.2503	17248	25.0021	-11.7846	16974.6	23.9295	-11.8839
		59.0667	11407.8	19135.9	33.7112	18130.4	28.7385	-5.82385	17654	26.6641	-5.92925	17745.3	27.0508	-8.02657	17735.8	27.0102	-9.17255	17635.7	26.5875	-10.3047	17294.8	25.1892	-11.5146	16987.7	23.98	-11.7504
		59.1333	11359.9	19121.7	33.6338	18169.7	28.9163	-5.56854	17751.2	27.076	-5.43989	17760.6	27.1158	-7.88401	17675.2	26.7538	-9.35153	17615.6	26.5031	-10.3115	17267.4	25.0794	-11.5469	17011.4	24.072	-11.581
		59.2	11384.8	19147	33.7719	18107.3	28.6344	-5.98861	17677.3	26.7624	-5.89159	17732.2	26.9948	-8.14325	17718	26.9347	-9.30876	17628	26.5551	-10.3977	17267.7	25.0807	-11.6837	16973.8	23.9264	-11.8647
		59.2667	11364.1	19160.1	33.8439	18150.1	28.8275	-5.8675	17707.6	26.8905	-5.83549	17722.7	26.9548	-8.25521	17750.1	27.0713	-9.24418	17633.3	26.5772	-10.4477	17260.1	25.0505	-11.7859	17001.5	24.0335	-11.8296
		59.3333	11387	19154.9	33.815	18117.9	28.682	-5.98402	17663.5	26.7044	-5.99267	17770.4	27.158	-8.02305	17735.8	27.0102	-9.27637	17595.6	26.4196	-10.5763	17231.5	24.9364	-11.8711	16946.1	23.8197	-12.0145
		59.4	11361.5	19168.2	33.8883	18195.6	29.0344	-5.70505	17678.1	26.7659	-6.00453	17708.2	26.8932	-8.36121	17707.8	26.8913	-9.46863	17712.5	26.9115	-10.1578	17205.7	24.8336	-12.0473	16970.4	23.9133	-11.9942
		59.4667	11390.1	19110	33.5697	18190.4	29.0105	-5.41033	17684.9	26.7947	-5.65716	17788.1	27.2337	-7.70215	17780.3	27.2002	-8.84114	17671.7	26.7388	-10.0119	17224.1	24.9068	-11.6555	16999.9	24.0272	-11.5618
		59.5333	11365.3	19129.5	33.6763	18150.4	28.8289	-5.69844	17684.9	26.7947	-5.76367	17713.5	26.9158	-8.12658	17684.7	26.7938	-9.35401	17638.3	26.5985	-10.2587	17275	25.1098	-11.559	16909	23.6773	-12.0182
		59.6	11380.4	19149.7	33.7867	18119.9	28.6912	-5.94664	17709.7	26.8996	-5.76917	17729.8	26.9846	-8.16823	17716.3	26.9276	-9.33069	17653.4	26.6616	-10.3061	17184.6	24.7503	-12.0289	16996.1	24.0125	-11.7934
		59.6667	11367.9	19098.9	33.5093	18121.4	28.6981	-5.6623	17663	26.7023	-5.68911	17727.5	26.9751	-7.90034	17738.7	27.0225	-8.95834	17617.3	26.5104	-10.1798	17207.5	24.8409	-11.6609	17020.3	24.1062	-11.4223
		59.7333	11391.2	19129.6	33.6765	18117	28.6779	-5.84969	17728.8	26.9805	-5.57818	17685.2	26.7957	-8.24698	17710.8	26.9043	-9.24377	17598.2	26.4304	-10.4271	17226.1	24.9147	-11.7544	16939.4	23.7937	-11.902
		59.8	11342.8	19093.9	33.4825	18114	28.6645	-5.66914	17703.9	26.875	-5.48968	17699.7	26.857	-7.99166	17710.7	26.9038	-9.05033	17645.3	26.6278	-10.0357	17332.3	25.34	-11.1351	16993.1	24.0011	-11.5006
		59.8667	11319.8	19202.7	34.0791	18236.9	29.2235	-5.70667	17729.6	26.9841	-5.97703	17679.4	26.7714	-8.67377	17677.4	26.7629	-9.78767	17617.3	26.5105	-10.7495	17235.4	24.9518	-12.1198	16932.3	23.7668	-12.3315
		59.9333	11358.2	19130.1	33.6794	18144.1	28.8005	-5.72998	17771.3	27.1615	-5.40001	17709.1	26.8967	-8.14877	17787.6	27.2314	-8.91958	17616.1	26.5051	-10.3552	17241.6	24.9766	-11.6953	16944.6	23.814	-11.8846
		60	11374.2	19090.5	33.4639	18147.8	28.8171	-5.49792	17700.4	26.8601	-5.48587	17749.4	27.0684	-7.76159	17681.9	26.7819	-9.1536	17645.7	26.6295	-10.0153	17257.3	25.0391	-11.4173	16899	23.639	-11.844

## Sheet: My 1-Step EZ-MTase RESULTS
			MTase Experiments
			LEVEL 1:
		For each substrate concentration, input the value (mM/min)
		of the matching Initial Slope from the GRAPH onto the left.
			TbPRMT7 RATES
			CORRECTED for 8-aza-SAM DECOMPOSITION
			[H4(1-20)]		slopes		RATE
			mM		(mM min-1)		(mM h-1)
			0		0		0
			16.59		-0.0826		4.956
			24.9956		-0.1139		6.834
			35.392		-0.1637		9.822
			49.9912		-0.214		12.84
			69.8992		-0.2679		16.074
			99.9824		-0.2903		17.418
			149.974		-0.3349		20.094
										CONGRATS!
										YOUR KINETIC DATA
										with its FIT
										LEVEL 2:
										Enter guess values for kcat and Km in GREEN cells.
										Enter your MTase enzyme concentration (BLUE cell).
										Use SOLVER to fit your data (see picture on the RIGHT).
			FOR FIT ONLY
			[H4(1-20)] (mM)		Predicted Rate (mM/h)	c 2			kcat (h-1)		38.3979	Best Fit Values
									Km (mM)		75.401																												Curve Fit
			0		0	0			[MTase] (mM)		0.8052																												[H4 1-20]		Predicted Rate (uM/h)
			16.59		5.57587	0.384241																																	(uM)
			24.9956		7.69762	0.745834			Sc2		3.11138
			35.392		9.87653	0.00297377																																	0			0
			49.9912		12.3264	0.26383																																	0.599894			0.244044
			69.8992		14.8737	1.44083																																	1.19979			0.484265
			99.9824		17.6257	0.0431451																																	1.79968			0.720753
			149.974		20.5741	0.230525																																	2.39958			0.953595
																																							2.99947			1.18287
																																							3.59937			1.40867
																																							4.19926			1.63106
																																							4.79916			1.85013
																																							5.39905			2.06594
																																							5.99894			2.27857
																																							6.59884			2.48809
																																							7.19873			2.69457
																																							7.79863			2.89807
																																							8.39852			3.09865
																																							8.99842			3.29639
																																							9.59831			3.49133
																																							10.1982			3.68354
																																							10.7981			3.87308
																																							11.398			4.05999
																																							11.9979			4.24434
																																							12.5978			4.42618
																																							13.1977			4.60556
																																							13.7976			4.78252
																																							14.3975			4.95711
																																							14.9974			5.12939
																																							15.5973			5.2994
																																							16.1971			5.46718
																																							16.797			5.63278
																																							17.3969			5.79624
																																							17.9968			5.9576
																																							18.5967			6.11689
																																							19.1966			6.27417
																																							19.7965			6.42947
																																							20.3964			6.58282
																																							20.9963			6.73426
																																							21.5962			6.88383
																																							22.1961			7.03155
																																							22.796			7.17748
																																							23.3959			7.32163
																																							23.9958			7.46404
																																							24.5957			7.60475
																																							25.1956			7.74377
																																							25.7955			7.88115
																																							26.3954			8.01691
																																							26.9952			8.15108
																																							27.5951			8.28368
																																							28.195			8.41475
																																							28.7949			8.54431
																																							29.3948			8.67239
																																							29.9947			8.799
																																							30.5946			8.92419
																																							31.1945			9.04797
																																							31.7944			9.17036
																																							32.3943			9.29139
																																							32.9942			9.41107
																																							33.5941			9.52945
																																							34.194			9.64652
																																							34.7939			9.76232
																																							35.3938			9.87687
																																							35.9937			9.99018
																																							36.5936			10.1023
																																							37.1935			10.2132
																																							37.7933			10.3229
																																							38.3932			10.4315
																																							38.9931			10.5389
																																							39.593			10.6452
																																							40.1929			10.7504
																																							40.7928			10.8546
																																							41.3927			10.9576
																																							41.9926			11.0596
																																							42.5925			11.1606
																																							43.1924			11.2605
																																							43.7923			11.3595
																																							44.3922			11.4574
																																							44.9921			11.5544
																																							45.592			11.6504
																																							46.1919			11.7454
																																							46.7918			11.8396
																																							47.3917			11.9328
																																							47.9916			12.0251
																																							48.5914			12.1165
																																							49.1913			12.207
																																							49.7912			12.2967
																																							50.3911			12.3855
																																							50.991			12.4734
																																							51.5909			12.5606
																																							52.1908			12.6469
																																							52.7907			12.7324
																																							53.3906			12.8171
																																							53.9905			12.901
																																							54.5904			12.9841
																																							55.1903			13.0665
																																							55.7902			13.1482
																																							56.3901			13.229
																																							56.99			13.3092
																																							57.5899			13.3886
																																							58.1898			13.4673
																																							58.7897			13.5454
																																							59.3895			13.6227
																																							59.9894			13.6993
																																							60.5893			13.7753
																																							61.1892			13.8506
																																							61.7891			13.9252
																																							62.389			13.9992
																																							62.9889			14.0725
																																							63.5888			14.1452
																																							64.1887			14.2173
																																							64.7886			14.2888
																																							65.3885			14.3596
																																							65.9884			14.4299
																																							66.5883			14.4995
																																							67.1882			14.5686
																																							67.7881			14.6371
																																							68.388			14.705
																																							68.9879			14.7724
																																							69.5878			14.8392
																																							70.1876			14.9054
																																							70.7875			14.9711
																																							71.3874			15.0363
																																							71.9873			15.101
																																							72.5872			15.1651
																																							73.1871			15.2287
																																							73.787			15.2918
																																							74.3869			15.3543
																																							74.9868			15.4164
																																							75.5867			15.478
																																							76.1866			15.5391
																																							76.7865			15.5997
																																							77.3864			15.6599
																																							77.9863			15.7196
																																							78.5862			15.7788
																																							79.1861			15.8375
																																							79.786			15.8958
																																							80.3858			15.9537
																																							80.9857			16.0111
																																							81.5856			16.068
																																							82.1855			16.1246
																																							82.7854			16.1807
																																							83.3853			16.2363
																																							83.9852			16.2916
																																							84.5851			16.3464
																																							85.185			16.4009
																																							85.7849			16.4549
																																							86.3848			16.5085
																																							86.9847			16.5618
																																							87.5846			16.6146
																																							88.1845			16.6671
																																							88.7844			16.7191
																																							89.3843			16.7708
																																							89.9842			16.8221
																																							90.5841			16.8731
																																							91.1839			16.9237
																																							91.7838			16.9739
																																							92.3837			17.0237
																																							92.9836			17.0732
																																							93.5835			17.1224
																																							94.1834			17.1712
																																							94.7833			17.2196
																																							95.3832			17.2678
																																							95.9831			17.3155
																																							96.583			17.363
																																							97.1829			17.4101
																																							97.7828			17.4569
																																							98.3827			17.5034
																																							98.9826			17.5495
																																							99.5825			17.5953
																																							100.182			17.6409
																																							100.782			17.6861
																																							101.382			17.731
																																							101.982			17.7756
																																							102.582			17.8199
																																							103.182			17.8639
																																							103.782			17.9076
																																							104.382			17.951
																																							104.982			17.9941
																																							105.581			18.0369
																																							106.181			18.0795
																																							106.781			18.1218
																																							107.381			18.1638
																																							107.981			18.2055
																																							108.581			18.2469
																																							109.181			18.2881
																																							109.781			18.329
																																							110.381			18.3697
																																							110.98			18.4101
																																							111.58			18.4502
																																							112.18			18.4901
																																							112.78			18.5297
																																							113.38			18.5691
																																							113.98			18.6082
																																							114.58			18.647
																																							115.18			18.6857
																																							115.78			18.7241
																																							116.38			18.7622
																																							116.979			18.8001
																																							117.579			18.8378
																																							118.179			18.8752
																																							118.779			18.9124
																																							119.379			18.9494
																																							119.979			18.9861
																																							120.579			19.0227
																																							121.179			19.059
																																							121.779			19.095
																																							122.378			19.1309
																																							122.978			19.1665
																																							123.578			19.202
																																							124.178			19.2372
																																							124.778			19.2722
																																							125.378			19.307
																																							125.978			19.3416
																																							126.578			19.376
																																							127.178			19.4101
																																							127.778			19.4441
																																							128.377			19.4779
																																							128.977			19.5115
																																							129.577			19.5449
																																							130.177			19.578
																																							130.777			19.611
																																							131.377			19.6438
																																							131.977			19.6765
																																							132.577			19.7089
																																							133.177			19.7411
																																							133.776			19.7732
																																							134.376			19.805
																																							134.976			19.8367
																																							135.576			19.8682
																																							136.176			19.8996
																																							136.776			19.9307
																																							137.376			19.9617
																																							137.976			19.9925
																																							138.576			20.0231
																																							139.176			20.0536
																																							139.775			20.0839
																																							140.375			20.114
																																							140.975			20.144
																																							141.575			20.1737
																																							142.175			20.2034
																																							142.775			20.2328
																																							143.375			20.2621
																																							143.975			20.2913
																																							144.575			20.3203
																																							145.174			20.3491
																																							145.774			20.3777
																																							146.374			20.4063
																																							146.974			20.4346
																																							147.574			20.4628
																																							148.174			20.4909
																																							148.774			20.5188
																																							149.374			20.5465
																																							149.974			20.5741
