# Supplementary material for: A simplified characterization of S-adenosyl-l-methionine-consuming enzymes with 1-Step EZ-MTase: a universal and straightforward coupled-assay for in vitro and in vivo setting
Source: Royal Society of Chemistry journal article supplement (doi:10.1039/c7sc02830j), 2017-01-01
Supplement: c7sc02830j2.xlsx [file c7sc02830j2.xlsx]

## Sheet: INSTRUCTIONS
	My 1-STEP EZ-MTase ASSAY
	Establish your experimental conditions (e.g. buffer, pH, MTase and other additives' concentrations) using worksheet "Experiment Conditions".
	Once your kinetics are complete, insert your experimental data within worksheet "Plate Reader Data".
	Within worksheet "Coupling Enzyme Parameters", input the pH at which your experiments were performed.
	You will also need to identify the methyl donor you selected for your experiments (SAM, 8-aza-SAM).
	Finally, determine initial velocities using worksheet "My 1-Step EZ-MTase RESULTS".
	Using the least square difference fit and 'SOLVER', this worksheet will deliver the kinetic parameters for your favorite MTase.
	Data in this file are pertinent to the kinetic behavior of H4(1-20) peptide with TbPRMT7

## Sheet: Experiment Conditions
My 1-Step EZ-MTase Assay
Experimental set-up and data analysis made easy.
Determine: kinetic parameters for Acceptor (Km and kcat) of your favorite MethylTransferase.
	In a UV-star 96-well flat bottom plate (Greiner Bio One, #655801), add the following reagents in row A.
	NOTE:	The well A1 is dedicated to Blank Sample (Methyl Acceptor is omitted).
		Data in well A1 will account for Background Signal (natural decomposition of cofactor).
		Reagents								#1	#2	#3	#4	#5	#6	#7	#8	#9	#10	#11	#12		Final in well	250	mL
Step 1		WATER								135.952	135.202	134.822	134.352	133.692	132.792	131.432	129.172	126.912	124.952	135.952	135.952
Step 2		BUFFER (stock at 200 mM; your favorite pH)								31.25	31.25	31.25	31.25	31.25	31.25	31.25	31.25	31.25	31.25	31.25	31.25		25	mM
Step 3		GLYCEROL (stock at 50%)								50	50	50	50	50	50	50	50	50	50	50	50		10	%
Step 4		bME (stock at 100 mM)								2.5	2.5	2.5	2.5	2.5	2.5	2.5	2.5	2.5	2.5	2.5	2.5		1	mM
Step 5		NaCl (optional)			Stock is at:		500		mM	0	0	0	0	0	0	0	0	0	0	0	0		0	mM
Step 6		Additive #2 (optional)			Stock is at:		20		mM	0	0	0	0	0	0	0	0	0	0	0	0		0	mM
MIX WELL! Step 7		TM0936 (final 4 mM)			Stock is at:		240.5		mM	4.158	4.158	4.158	4.158	4.158	4.158	4.158	4.158	4.158	4.158	4.158	4.158		4	mM
Step 8		Your favorite MTase (final 1 mM)				Stock is at:		16.5	mM	15.1515	15.1515	15.1515	15.1515	15.1515	15.1515	15.1515	15.1515	15.1515	15.1515	15.1515	15.1515		1000	nM
Step 9 Add Methyl Acceptor		Methyl Acceptor (for Meas in #2 - #12)								0	0.75	1.13	1.6	2.26	3.16	4.52	6.78	9.04	11				various	mM
		or Water (for Blk in #1)
MIX WELL & READ DIRECTLY!		This step STARTS the MethylTranferase Reaction!								10.9881	10.9881	10.9881	10.9881	10.9881	10.9881	10.9881	10.9881	10.9881	10.9881	10.9881	10.9881		25.8	mM
		SAM or 8-aza-SAM			Stock is at:		0.587		mM
		Desired Final Acceptor Concentration (in mM)								0	16.59	24.9956	35.392	49.9912	69.8992	99.9824	149.974	199.965	243.32	0	0
		Original Acceptor Concentration:						5.53	mM
		NOTE:	Cells in GREEN are ACTIVE and MUST be filed by user.							Cells in GREY (Methyl Acceptor) are ACTIVE and MUST be filed by user.

## Sheet: Plate Reader Data
My 1-Step EZ-MTase Assay *** Data Input ***
For each well, your plate reader recorded absorbance values. Absorbance was measured every T second over an extanded period of time.
Step 1:	Please enter the interval T (in second) within the ORANGE cell.							Enter your Acceptor experimental concentrations withing the PINK cells.
				Step 2:	Copy/Paste, within GREEN cells, the plate reader values for BLANK experiments (Blk).
				Step 3:	Copy/Paste, within GREEN cells, the plate reader values for MTase experiments (Meas).
				NOTE:	RED cells are not to be modified.
interval T (s)		Time (min)	[H4(1-20)] (mM)	16.59		24.9956		35.392		49.9912		69.8992		99.9824		149.974		199.965		243.32
			Blk (#1)	Meas		Meas		Meas		Meas		Meas		Meas		Meas		Meas		Meas
5		0	0.3829	0.3777	-6.981	0.375	-10.6058	0.3742	-11.6798	0.3731	-13.1565	0.3713	-15.573	0.3714	-15.4388	0.3735	-12.6195	0.3729	-13.425	0.3778	-6.84675
		0.0833333	0.3814	0.3768	-6.1755	0.3736	-10.4715	0.3723	-12.2167	0.3718	-12.888	0.3702	-15.036	0.3705	-14.6333	0.3719	-12.7538	0.3707	-14.3648	0.3774	-5.37
		0.166667	0.3817	0.3758	-7.92075	0.3735	-11.0085	0.3714	-13.8277	0.3723	-12.6195	0.3696	-16.2443	0.3694	-16.5127	0.3719	-13.1565	0.3712	-14.0963	0.3761	-7.518
Optical Factor correction to a LIGHT PATH of 10 mm using the PLATE #655801 and 250 mL per well.		0.25	0.38	0.3752	-6.444	0.3728	-9.666	0.3704	-12.888	0.3709	-12.2167	0.3693	-14.3647	0.3688	-15.036	0.3708	-12.351	0.3709	-12.2167	0.3749	-6.84675
		0.333333	0.3805	0.3743	-8.3235	0.3717	-11.814	0.3701	-13.962	0.3698	-14.3647	0.3681	-16.647	0.368	-16.7813	0.3697	-14.499	0.3701	-13.962	0.3743	-8.3235
		0.416667	0.3802	0.3741	-8.18925	0.3719	-11.1427	0.3699	-13.8277	0.3694	-14.499	0.368	-16.3785	0.3681	-16.2443	0.37	-13.6935	0.37	-13.6935	0.374	-8.3235
		0.5	0.3807	0.3739	-9.129	0.3714	-12.4852	0.369	-15.7072	0.3683	-16.647	0.3677	-17.4525	0.3672	-18.1237	0.3694	-15.1702	0.3698	-14.6332	0.3738	-9.26325
		0.583333	0.378	0.3732	-6.444	0.3711	-9.26325	0.3689	-12.2167	0.3688	-12.351	0.3665	-15.4388	0.3663	-15.7072	0.3682	-13.1565	0.3692	-11.814	0.3727	-7.11525
		0.666667	0.3782	0.3734	-6.444	0.3702	-10.74	0.3679	-13.8277	0.3671	-14.9017	0.3672	-14.7675	0.3674	-14.499	0.3688	-12.6195	0.3687	-12.7537	0.373	-6.981
		0.75	0.3785	0.3732	-7.11525	0.3706	-10.6058	0.3686	-13.2908	0.368	-14.0963	0.3661	-16.647	0.3666	-15.9758	0.3689	-12.888	0.3681	-13.962	0.3726	-7.92075
		0.833333	0.3789	0.3731	-7.7865	0.3698	-12.2167	0.3678	-14.9017	0.3675	-15.3045	0.3667	-16.3785	0.3663	-16.9155	0.3683	-14.2305	0.3682	-14.3647	0.3719	-9.3975
		0.916667	0.3784	0.3725	-7.92075	0.3698	-11.5455	0.3672	-15.036	0.3671	-15.1703	0.3667	-15.7072	0.3653	-17.5868	0.3676	-14.499	0.3675	-14.6333	0.3718	-8.8605
1.3425		1	0.3783	0.372	-8.45775	0.3698	-11.4113	0.3676	-14.3648	0.3673	-14.7675	0.3664	-15.9758	0.3655	-17.184	0.3665	-15.8415	0.3676	-14.3648	0.3714	-9.26325
		1.08333	0.3781	0.3723	-7.7865	0.3698	-11.1427	0.3669	-15.036	0.3668	-15.1702	0.3658	-16.5127	0.3647	-17.9895	0.3667	-15.3045	0.3681	-13.425	0.3718	-8.45775
		1.16667	0.3781	0.3721	-8.055	0.3693	-11.814	0.3673	-14.499	0.3656	-16.7813	0.3656	-16.7813	0.3649	-17.721	0.3661	-16.11	0.3669	-15.036	0.3703	-10.4715
		1.25	0.3778	0.3724	-7.2495	0.3696	-11.0085	0.3665	-15.1703	0.3669	-14.6333	0.3661	-15.7073	0.3644	-17.9895	0.3665	-15.1703	0.3661	-15.7073	0.3703	-10.0688
		1.33333	0.3783	0.3709	-9.9345	0.3691	-12.351	0.3666	-15.7073	0.3659	-16.647	0.3658	-16.7813	0.3639	-19.332	0.3658	-16.7813	0.366	-16.5128	0.3707	-10.203
		1.41667	0.3778	0.3713	-8.72625	0.3694	-11.277	0.3668	-14.7675	0.3663	-15.4388	0.3647	-17.5868	0.3639	-18.6608	0.3655	-16.5128	0.3653	-16.7813	0.3692	-11.5455
		1.5	0.378	0.3715	-8.72625	0.3688	-12.351	0.3662	-15.8415	0.3668	-15.036	0.3651	-17.3183	0.3633	-19.7347	0.3656	-16.647	0.3648	-17.721	0.3688	-12.351
		1.58333	0.3785	0.3713	-9.666	0.3693	-12.351	0.3666	-15.9758	0.3662	-16.5127	0.3642	-19.1977	0.3635	-20.1375	0.3649	-18.258	0.3653	-17.721	0.3692	-12.4853
		1.66667	0.3784	0.3706	-10.4715	0.3686	-13.1565	0.366	-16.647	0.3659	-16.7813	0.3637	-19.7347	0.3627	-21.0772	0.3644	-18.795	0.364	-19.332	0.3689	-12.7538
		1.75	0.3776	0.37	-10.203	0.3682	-12.6195	0.366	-15.573	0.366	-15.573	0.3642	-17.9895	0.3636	-18.795	0.3648	-17.184	0.3639	-18.3922	0.3685	-12.2167
		1.83333	0.3775	0.3708	-8.99475	0.368	-12.7538	0.3654	-16.2443	0.3655	-16.11	0.3634	-18.9293	0.3629	-19.6005	0.3643	-17.721	0.3646	-17.3183	0.3684	-12.2167
		1.91667	0.3769	0.3705	-8.592	0.3689	-10.74	0.3655	-15.3045	0.3655	-15.3045	0.3643	-16.9155	0.3624	-19.4663	0.3634	-18.1238	0.3639	-17.4525	0.3676	-12.4853
		2	0.3772	0.3698	-9.9345	0.3677	-12.7537	0.3651	-16.2443	0.365	-16.3785	0.3644	-17.184	0.362	-20.406	0.3635	-18.3922	0.3628	-19.332	0.3674	-13.1565
		2.08333	0.3776	0.37	-10.203	0.3682	-12.6195	0.3649	-17.0497	0.3651	-16.7813	0.3629	-19.7347	0.3627	-20.0032	0.363	-19.6005	0.3634	-19.0635	0.3672	-13.962
		2.16667	0.377	0.3698	-9.666	0.3672	-13.1565	0.3654	-15.573	0.3646	-16.647	0.3632	-18.5265	0.3624	-19.6005	0.3628	-19.0635	0.3631	-18.6608	0.3677	-12.4852
		2.25	0.3771	0.3709	-8.3235	0.3674	-13.0222	0.365	-16.2443	0.3651	-16.11	0.3636	-18.1238	0.3624	-19.7347	0.3636	-18.1238	0.3629	-19.0635	0.3676	-12.7538
		2.33333	0.3775	0.3703	-9.666	0.3679	-12.888	0.3643	-17.721	0.3642	-17.8552	0.3631	-19.332	0.3623	-20.406	0.363	-19.4663	0.3629	-19.6005	0.3671	-13.962
		2.41667	0.3768	0.3695	-9.80025	0.3674	-12.6195	0.3644	-16.647	0.3642	-16.9155	0.3632	-18.258	0.3617	-20.2718	0.3627	-18.9293	0.3626	-19.0635	0.3659	-14.6333
		2.5	0.3777	0.3693	-11.277	0.3677	-13.425	0.3648	-17.3182	0.364	-18.3922	0.3622	-20.8087	0.3607	-22.8225	0.3621	-20.943	0.3618	-21.3457	0.3656	-16.2443
		2.58333	0.3771	0.369	-10.8742	0.367	-13.5592	0.3638	-17.8552	0.3634	-18.3922	0.3621	-20.1375	0.3602	-22.6882	0.362	-20.2718	0.3614	-21.0772	0.3649	-16.3785
		2.66667	0.3766	0.3691	-10.0688	0.3672	-12.6195	0.3644	-16.3785	0.3636	-17.4525	0.3616	-20.1375	0.3607	-21.3457	0.3621	-19.4663	0.362	-19.6005	0.3659	-14.3647
		2.75	0.3767	0.3702	-8.72625	0.3672	-12.7537	0.3641	-16.9155	0.3631	-18.258	0.3617	-20.1375	0.3607	-21.48	0.3617	-20.1375	0.3606	-21.6143	0.3658	-14.6332
		2.83333	0.3772	0.3692	-10.74	0.3668	-13.962	0.3645	-17.0497	0.3627	-19.4662	0.3618	-20.6745	0.3604	-22.554	0.3616	-20.943	0.3613	-21.3457	0.365	-16.3785
		2.91667	0.3766	0.3686	-10.74	0.3672	-12.6195	0.3633	-17.8552	0.3638	-17.184	0.3612	-20.6745	0.3602	-22.017	0.3616	-20.1375	0.3607	-21.3457	0.3658	-14.499
		3	0.3774	0.3681	-12.4853	0.3668	-14.2305	0.3637	-18.3922	0.362	-20.6745	0.3604	-22.8225	0.3605	-22.6883	0.3624	-20.1375	0.3602	-23.091	0.3647	-17.0497
		3.08333	0.3768	0.3681	-11.6798	0.3672	-12.888	0.3636	-17.721	0.3623	-19.4663	0.3607	-21.6143	0.3598	-22.8225	0.3615	-20.5403	0.3593	-23.4938	0.3646	-16.3785
		3.16667	0.3765	0.3686	-10.6058	0.367	-12.7538	0.363	-18.1238	0.3623	-19.0635	0.3607	-21.2115	0.3596	-22.6883	0.3616	-20.0033	0.3596	-22.6883	0.3645	-16.11
		3.25	0.376	0.3687	-9.80025	0.3659	-13.5592	0.363	-17.4525	0.3619	-18.9293	0.3605	-20.8088	0.3595	-22.1513	0.3609	-20.2718	0.3603	-21.0772	0.3641	-15.9758
		3.33333	0.3765	0.3686	-10.6058	0.3658	-14.3647	0.3638	-17.0497	0.3624	-18.9293	0.3604	-21.6143	0.358	-24.8363	0.3605	-21.48	0.3594	-22.9568	0.3642	-16.5127
		3.41667	0.3766	0.3679	-11.6797	0.3665	-13.5592	0.3633	-17.8552	0.3611	-20.8088	0.3598	-22.554	0.3588	-23.8965	0.3599	-22.4197	0.3598	-22.554	0.364	-16.9155
		3.5	0.3762	0.3681	-10.8742	0.3657	-14.0962	0.3628	-17.9895	0.3609	-20.5402	0.3599	-21.8827	0.3589	-23.2252	0.3602	-21.48	0.3594	-22.554	0.3626	-18.258
		3.58333	0.3763	0.3685	-10.4715	0.3659	-13.962	0.3627	-18.258	0.3619	-19.332	0.3596	-22.4198	0.3593	-22.8225	0.3596	-22.4198	0.3592	-22.9568	0.3625	-18.5265
		3.66667	0.3764	0.3677	-11.6797	0.3656	-14.499	0.3631	-17.8553	0.3608	-20.943	0.3595	-22.6883	0.3583	-24.2993	0.3593	-22.9568	0.3577	-25.1047	0.3624	-18.795
		3.75	0.3758	0.3675	-11.1428	0.3653	-14.0963	0.3626	-17.721	0.3607	-20.2718	0.3597	-21.6143	0.3572	-24.9705	0.3584	-23.3595	0.3594	-22.017	0.3625	-17.8553
		3.83333	0.3761	0.3673	-11.814	0.3659	-13.6935	0.3617	-19.332	0.3608	-20.5402	0.3587	-23.3595	0.3579	-24.4335	0.3583	-23.8965	0.3584	-23.7622	0.363	-17.5868
		3.91667	0.3763	0.3677	-11.5455	0.3651	-15.036	0.3627	-18.258	0.3609	-20.6745	0.3587	-23.628	0.3572	-25.6418	0.3579	-24.702	0.3579	-24.702	0.3616	-19.7348
		4	0.3761	0.3671	-12.0825	0.3648	-15.1702	0.3615	-19.6005	0.3608	-20.5402	0.3592	-22.6882	0.3577	-24.702	0.3582	-24.0307	0.3581	-24.165	0.3618	-19.1977
		4.08333	0.3763	0.3671	-12.351	0.365	-15.1703	0.3616	-19.7348	0.3594	-22.6883	0.3591	-23.091	0.3577	-24.9705	0.3583	-24.165	0.3579	-24.702	0.362	-19.1978
		4.16667	0.3764	0.3675	-11.9483	0.3644	-16.11	0.3616	-19.869	0.3598	-22.2855	0.358	-24.702	0.357	-26.0445	0.358	-24.702	0.3571	-25.9103	0.3608	-20.943
		4.25	0.3757	0.3667	-12.0825	0.3647	-14.7675	0.3614	-19.1977	0.3606	-20.2718	0.3586	-22.9568	0.357	-25.1047	0.3569	-25.239	0.3574	-24.5677	0.3612	-19.4662
		4.33333	0.3766	0.367	-12.888	0.3648	-15.8415	0.3611	-20.8088	0.3601	-22.1513	0.3579	-25.1047	0.3559	-27.7897	0.3572	-26.0445	0.3572	-26.0445	0.3606	-21.48
		4.41667	0.3757	0.3668	-11.9482	0.3655	-13.6935	0.3615	-19.0635	0.3594	-21.8827	0.3583	-23.3595	0.3564	-25.9102	0.3573	-24.702	0.3566	-25.6418	0.3605	-20.406
		4.5	0.3767	0.3663	-13.962	0.3653	-15.3045	0.3616	-20.2718	0.3591	-23.628	0.3577	-25.5075	0.3569	-26.5815	0.3579	-25.239	0.3566	-26.9843	0.3611	-20.943
		4.58333	0.3763	0.3656	-14.3648	0.3651	-15.036	0.361	-20.5403	0.3597	-22.2855	0.3572	-25.6418	0.3569	-26.0445	0.3574	-25.3733	0.356	-27.2528	0.3595	-22.554
		4.66667	0.3756	0.3667	-11.9482	0.3644	-15.036	0.3606	-20.1375	0.3594	-21.7485	0.3571	-24.8363	0.3564	-25.776	0.3565	-25.6418	0.3552	-27.387	0.3594	-21.7485
		4.75	0.3765	0.3665	-13.425	0.3643	-16.3785	0.3601	-22.017	0.3587	-23.8965	0.3577	-25.239	0.355	-28.8638	0.3559	-27.6555	0.3552	-28.5952	0.3591	-23.3595
		4.83333	0.3754	0.3661	-12.4853	0.3639	-15.4388	0.3597	-21.0772	0.3585	-22.6883	0.3568	-24.9705	0.3547	-27.7897	0.3558	-26.313	0.3547	-27.7897	0.3589	-22.1513
		4.91667	0.3757	0.366	-13.0222	0.3641	-15.573	0.3604	-20.5402	0.358	-23.7622	0.3566	-25.6418	0.3552	-27.5212	0.3563	-26.0445	0.3553	-27.387	0.3592	-22.1512
		5	0.3757	0.366	-13.0222	0.363	-17.0497	0.3598	-21.3457	0.3585	-23.091	0.3561	-26.313	0.3551	-27.6555	0.3552	-27.5212	0.355	-27.7897	0.359	-22.4197
		5.08333	0.3758	0.3657	-13.5592	0.3633	-16.7813	0.3598	-21.48	0.3582	-23.628	0.3573	-24.8363	0.3546	-28.461	0.3556	-27.1185	0.3543	-28.8638	0.3581	-23.7623
		5.16667	0.3756	0.3657	-13.2907	0.3629	-17.0497	0.3597	-21.3457	0.3575	-24.2993	0.3572	-24.702	0.3542	-28.7295	0.3545	-28.3268	0.3546	-28.1925	0.3581	-23.4938
		5.25	0.3762	0.3653	-14.6332	0.363	-17.721	0.3595	-22.4197	0.3578	-24.702	0.3565	-26.4472	0.3542	-29.535	0.355	-28.461	0.3545	-29.1322	0.3579	-24.5677
		5.33333	0.3756	0.3657	-13.2907	0.3627	-17.3182	0.3596	-21.48	0.3577	-24.0307	0.3562	-26.0445	0.3536	-29.535	0.3537	-29.4007	0.3537	-29.4007	0.3576	-24.165
		5.41667	0.376	0.3658	-13.6935	0.3626	-17.9895	0.3595	-22.1513	0.3576	-24.702	0.3563	-26.4472	0.3537	-29.9377	0.3539	-29.6693	0.3536	-30.072	0.3582	-23.8965
		5.5	0.3752	0.3657	-12.7537	0.3624	-17.184	0.3585	-22.4197	0.3568	-24.702	0.355	-27.1185	0.3538	-28.7295	0.354	-28.461	0.3536	-28.998	0.3574	-23.8965
		5.58333	0.3752	0.3659	-12.4852	0.3621	-17.5868	0.3591	-21.6143	0.3575	-23.7622	0.3554	-26.5815	0.3539	-28.5952	0.3542	-28.1925	0.3538	-28.7295	0.3567	-24.8362
		5.66667	0.376	0.3653	-14.3647	0.3626	-17.9895	0.3591	-22.6883	0.3576	-24.702	0.3554	-27.6555	0.3528	-31.146	0.3543	-29.1322	0.353	-30.8775	0.3566	-26.0445
		5.75	0.3759	0.3655	-13.962	0.3624	-18.1238	0.3585	-23.3595	0.3566	-25.9103	0.3553	-27.6555	0.3528	-31.0118	0.3532	-30.4748	0.3532	-30.4748	0.3567	-25.776
		5.83333	0.3759	0.3651	-14.499	0.3621	-18.5265	0.359	-22.6883	0.3563	-26.313	0.3544	-28.8638	0.3529	-30.8775	0.3535	-30.072	0.3529	-30.8775	0.3558	-26.9843
		5.91667	0.3761	0.3646	-15.4388	0.3627	-17.9895	0.3588	-23.2252	0.3565	-26.313	0.3546	-28.8637	0.3521	-32.22	0.3534	-30.4748	0.3522	-32.0857	0.356	-26.9843
		6	0.3759	0.3641	-15.8415	0.3621	-18.5265	0.3578	-24.2993	0.3569	-25.5075	0.3544	-28.8638	0.3521	-31.9515	0.353	-30.7433	0.3522	-31.8173	0.356	-26.7158
		6.08333	0.376	0.3641	-15.9758	0.3623	-18.3922	0.3581	-24.0308	0.3559	-26.9843	0.3539	-29.6693	0.3526	-31.4145	0.3522	-31.9515	0.3523	-31.8173	0.3553	-27.7897
		6.16667	0.3751	0.3643	-14.499	0.3611	-18.795	0.3584	-22.4197	0.3555	-26.313	0.3545	-27.6555	0.3519	-31.146	0.3523	-30.609	0.3517	-31.4145	0.3556	-26.1787
		6.25	0.3751	0.3641	-14.7675	0.3614	-18.3922	0.358	-22.9568	0.3558	-25.9102	0.3538	-28.5952	0.3528	-29.9377	0.352	-31.0118	0.3522	-30.7432	0.3552	-26.7157
		6.33333	0.3757	0.3644	-15.1702	0.3619	-18.5265	0.3569	-25.239	0.3557	-26.85	0.3537	-29.535	0.3515	-32.4885	0.3525	-31.146	0.3513	-32.757	0.3552	-27.5212
		6.41667	0.3758	0.3638	-16.11	0.361	-19.869	0.3574	-24.702	0.3562	-26.313	0.3536	-29.8035	0.3511	-33.1598	0.3522	-31.683	0.3516	-32.4885	0.3549	-28.0583
		6.5	0.3754	0.3638	-15.573	0.3606	-19.869	0.3584	-22.8225	0.3552	-27.1185	0.3533	-29.6693	0.3519	-31.5488	0.3518	-31.683	0.3523	-31.0118	0.3547	-27.7897
		6.58333	0.3754	0.3637	-15.7072	0.3607	-19.7347	0.3577	-23.7622	0.356	-26.0445	0.3534	-29.535	0.3511	-32.6227	0.352	-31.4145	0.3511	-32.6227	0.3535	-29.4008
		6.66667	0.3753	0.363	-16.5128	0.3608	-19.4663	0.3576	-23.7623	0.3555	-26.5815	0.3529	-30.072	0.351	-32.6228	0.352	-31.2803	0.3505	-33.294	0.3538	-28.8638
		6.75	0.3753	0.3635	-15.8415	0.3606	-19.7348	0.3571	-24.4335	0.356	-25.9103	0.3534	-29.4008	0.3503	-33.5625	0.3513	-32.22	0.3502	-33.6968	0.3538	-28.8638
		6.83333	0.3749	0.3629	-16.11	0.3602	-19.7347	0.3568	-24.2993	0.3552	-26.4472	0.3528	-29.6693	0.3506	-32.6227	0.3514	-31.5488	0.3506	-32.6227	0.3538	-28.3268
		6.91667	0.3755	0.363	-16.7813	0.3606	-20.0033	0.358	-23.4938	0.3547	-27.924	0.3527	-30.609	0.3504	-33.6968	0.3508	-33.1598	0.3498	-34.5022	0.354	-28.8638
		7	0.3751	0.3629	-16.3785	0.3594	-21.0772	0.3566	-24.8363	0.3548	-27.2527	0.3525	-30.3405	0.35	-33.6968	0.3503	-33.294	0.3493	-34.6365	0.353	-29.6693
		7.08333	0.376	0.3633	-17.0497	0.3605	-20.8088	0.3566	-26.0445	0.3544	-28.998	0.3528	-31.146	0.3503	-34.5022	0.3501	-34.7707	0.3495	-35.5763	0.3524	-31.683
		7.16667	0.3743	0.3634	-14.6333	0.3595	-19.869	0.3568	-23.4938	0.3546	-26.4472	0.3522	-29.6693	0.3495	-33.294	0.3503	-32.22	0.3491	-33.831	0.3526	-29.1322
		7.25	0.3755	0.3628	-17.0497	0.3597	-21.2115	0.3558	-26.4472	0.3542	-28.5952	0.3532	-29.9377	0.3498	-34.5022	0.3498	-34.5022	0.3485	-36.2475	0.3527	-30.609
		7.33333	0.3746	0.3625	-16.2443	0.3602	-19.332	0.3555	-25.6418	0.354	-27.6555	0.352	-30.3405	0.3491	-34.2337	0.35	-33.0255	0.3488	-34.6365	0.3519	-30.4748
		7.41667	0.3755	0.3628	-17.0497	0.3598	-21.0772	0.3556	-26.7157	0.354	-28.8638	0.3525	-30.8775	0.3492	-35.3077	0.3491	-35.442	0.3484	-36.3818	0.3518	-31.8173
		7.5	0.3744	0.3633	-14.9017	0.3604	-18.795	0.3556	-25.239	0.3542	-27.1185	0.3517	-30.4748	0.349	-34.0995	0.3499	-32.8913	0.3481	-35.3077	0.3525	-29.4008
		7.58333	0.3744	0.3626	-15.8415	0.3592	-20.406	0.3557	-25.1047	0.3533	-28.3268	0.351	-31.4145	0.3487	-34.5022	0.3489	-34.2338	0.3483	-35.0393	0.3515	-30.7433
		7.66667	0.3748	0.3623	-16.7813	0.3595	-20.5403	0.3557	-25.6418	0.3532	-28.998	0.3505	-32.6228	0.3492	-34.368	0.349	-34.6365	0.3477	-36.3818	0.3512	-31.683
		7.75	0.3742	0.3622	-16.11	0.359	-20.406	0.3557	-24.8362	0.3534	-27.924	0.3514	-30.609	0.3493	-33.4282	0.348	-35.1735	0.3472	-36.2475	0.3518	-30.072
		7.83333	0.3749	0.3615	-17.9895	0.3607	-19.0635	0.3554	-26.1788	0.3531	-29.2665	0.3506	-32.6227	0.3487	-35.1735	0.3479	-36.2475	0.3471	-37.3215	0.3509	-32.22
		7.91667	0.3755	0.3626	-17.3183	0.3592	-21.8827	0.3553	-27.1185	0.3527	-30.609	0.3504	-33.6968	0.3485	-36.2475	0.3479	-37.053	0.3473	-37.8585	0.3503	-33.831
		8	0.3758	0.3614	-19.332	0.3589	-22.6883	0.3549	-28.0583	0.3534	-30.072	0.3505	-33.9653	0.3484	-36.7845	0.3484	-36.7845	0.3472	-38.3955	0.3505	-33.9653
		8.08333	0.375	0.362	-17.4525	0.3592	-21.2115	0.3548	-27.1185	0.3528	-29.8035	0.3508	-32.4885	0.3482	-35.979	0.3477	-36.6502	0.3469	-37.7243	0.3508	-32.4885
		8.16667	0.3746	0.3619	-17.0497	0.359	-20.943	0.3548	-26.5815	0.3528	-29.2665	0.3507	-32.0857	0.3473	-36.6502	0.3477	-36.1132	0.3459	-38.5298	0.3503	-32.6227
		8.25	0.3751	0.3617	-17.9895	0.3587	-22.017	0.3552	-26.7157	0.3527	-30.072	0.3502	-33.4282	0.3471	-37.59	0.347	-37.7243	0.3457	-39.4695	0.3495	-34.368
		8.33333	0.3751	0.3611	-18.795	0.3583	-22.554	0.3548	-27.2527	0.3525	-30.3405	0.3497	-34.0995	0.3477	-36.7845	0.3468	-37.9927	0.3458	-39.3352	0.3495	-34.368
		8.41667	0.3747	0.3606	-18.9293	0.3584	-21.8827	0.3538	-28.0582	0.3519	-30.609	0.3498	-33.4282	0.3473	-36.7845	0.3462	-38.2612	0.3457	-38.9325	0.3494	-33.9652
		8.5	0.3747	0.3614	-17.8552	0.358	-22.4197	0.354	-27.7897	0.3521	-30.3405	0.3491	-34.368	0.3466	-37.7242	0.3465	-37.8585	0.3461	-38.3955	0.3488	-34.7707
		8.58333	0.3759	0.361	-20.0033	0.3588	-22.9568	0.3541	-29.2665	0.3512	-33.1598	0.349	-36.1133	0.3465	-39.4695	0.3471	-38.664	0.3456	-40.6777	0.3482	-37.1873
		8.66667	0.3751	0.3608	-19.1977	0.3585	-22.2855	0.3537	-28.7295	0.3521	-30.8775	0.3498	-33.9652	0.3468	-37.9927	0.3457	-39.4695	0.3456	-39.6037	0.3483	-35.979
		8.75	0.3747	0.3609	-18.5265	0.3581	-22.2855	0.3533	-28.7295	0.3512	-31.5487	0.3499	-33.294	0.3465	-37.8585	0.3456	-39.0667	0.3442	-40.9462	0.3485	-35.1735
		8.83333	0.3743	0.3603	-18.795	0.3586	-21.0773	0.3537	-27.6555	0.3517	-30.3405	0.3483	-34.905	0.3461	-37.8585	0.3459	-38.127	0.3452	-39.0668	0.3479	-35.442
		8.91667	0.3753	0.361	-19.1978	0.3582	-22.9568	0.3534	-29.4008	0.3517	-31.683	0.349	-35.3078	0.3464	-38.7983	0.3454	-40.1408	0.3445	-41.349	0.3478	-36.9188
		9	0.3741	0.3611	-17.4525	0.3578	-21.8827	0.353	-28.3268	0.3515	-30.3405	0.3491	-33.5625	0.3455	-38.3955	0.3451	-38.9325	0.3442	-40.1407	0.3477	-35.442
		9.08333	0.3747	0.3602	-19.4662	0.357	-23.7622	0.3529	-29.2665	0.3514	-31.2802	0.3487	-34.905	0.3457	-38.9325	0.3461	-38.3955	0.3443	-40.812	0.347	-37.1873
		9.16667	0.3748	0.3598	-20.1375	0.3572	-23.628	0.3534	-28.7295	0.3512	-31.683	0.3482	-35.7105	0.3458	-38.9325	0.345	-40.0065	0.3451	-39.8723	0.3482	-35.7105
		9.25	0.3746	0.3606	-18.795	0.3566	-24.165	0.3537	-28.0582	0.3503	-32.6227	0.3481	-35.5762	0.345	-39.738	0.3445	-40.4093	0.3439	-41.2148	0.3475	-36.3818
		9.33333	0.3758	0.3603	-20.8088	0.357	-25.239	0.3526	-31.146	0.3508	-33.5625	0.3475	-37.9928	0.3448	-41.6175	0.3448	-41.6175	0.3432	-43.7655	0.347	-38.664
		9.41667	0.3748	0.3603	-19.4663	0.3572	-23.628	0.3532	-28.998	0.3506	-32.4885	0.3478	-36.2475	0.3451	-39.8723	0.3441	-41.2148	0.3443	-40.9463	0.3462	-38.3955
		9.5	0.3752	0.36	-20.406	0.3572	-24.165	0.3533	-29.4007	0.3508	-32.757	0.348	-36.516	0.3446	-41.0805	0.3444	-41.349	0.3426	-43.7655	0.3462	-38.9325
		9.58333	0.3742	0.3598	-19.332	0.357	-23.091	0.3515	-30.4748	0.3502	-32.22	0.3482	-34.905	0.345	-39.201	0.3441	-40.4092	0.3432	-41.6175	0.3462	-37.59
		9.66667	0.3744	0.3596	-19.869	0.3573	-22.9568	0.3521	-29.9377	0.3501	-32.6227	0.3474	-36.2475	0.3444	-40.275	0.3442	-40.5435	0.3434	-41.6175	0.346	-38.127
		9.75	0.3745	0.3595	-20.1375	0.3569	-23.628	0.3518	-30.4748	0.3503	-32.4885	0.3472	-36.6502	0.3441	-40.812	0.3439	-41.0805	0.3419	-43.7655	0.346	-38.2613
		9.83333	0.3738	0.36	-18.5265	0.3573	-22.1513	0.3521	-29.1322	0.3502	-31.683	0.3477	-35.0393	0.3442	-39.738	0.3435	-40.6777	0.3419	-42.8258	0.3462	-37.053
		9.91667	0.3748	0.3596	-20.406	0.3565	-24.5678	0.3514	-31.4145	0.3501	-33.1598	0.3475	-36.6503	0.3442	-41.0805	0.3435	-42.0202	0.3419	-44.1683	0.345	-40.0065
		10	0.3747	0.3594	-20.5402	0.3568	-24.0307	0.3519	-30.609	0.3494	-33.9652	0.3464	-37.9927	0.3435	-41.886	0.3427	-42.96	0.342	-43.8997	0.347	-37.1873
		10.0833	0.3741	0.3593	-19.869	0.3565	-23.628	0.3519	-29.8035	0.35	-32.3543	0.3467	-36.7845	0.3439	-40.5435	0.3424	-42.5573	0.3414	-43.8998	0.3448	-39.3352
		10.1667	0.3736	0.3595	-18.9293	0.3559	-23.7622	0.3517	-29.4007	0.3492	-32.757	0.3459	-37.1873	0.3437	-40.1407	0.3433	-40.6777	0.3411	-43.6312	0.3447	-38.7982
		10.25	0.3749	0.3598	-20.2718	0.3563	-24.9705	0.3514	-31.5488	0.3496	-33.9652	0.3461	-38.664	0.3434	-42.2888	0.342	-44.1682	0.3408	-45.7793	0.3444	-40.9463
		10.3333	0.374	0.3596	-19.332	0.3561	-24.0307	0.3512	-30.609	0.3489	-33.6968	0.346	-37.59	0.3428	-41.886	0.3422	-42.6915	0.3407	-44.7052	0.344	-40.275
		10.4167	0.3738	0.3585	-20.5403	0.3556	-24.4335	0.3513	-30.2063	0.3492	-33.0255	0.3463	-36.9188	0.3431	-41.2148	0.3423	-42.2888	0.3414	-43.497	0.3435	-40.6777
		10.5	0.3739	0.3591	-19.869	0.3556	-24.5677	0.3505	-31.4145	0.3491	-33.294	0.3457	-37.8585	0.3432	-41.2148	0.3422	-42.5573	0.3414	-43.6313	0.3438	-40.4093
		10.5833	0.374	0.3592	-19.869	0.3561	-24.0307	0.3509	-31.0118	0.3488	-33.831	0.3454	-38.3955	0.3425	-42.2887	0.342	-42.96	0.3406	-44.8395	0.3433	-41.2148
		10.6667	0.3742	0.3596	-19.6005	0.3562	-24.165	0.3516	-30.3405	0.3486	-34.368	0.3457	-38.2612	0.342	-43.2285	0.3414	-44.034	0.3398	-46.182	0.3429	-42.0202
		10.75	0.3742	0.3588	-20.6745	0.356	-24.4335	0.3507	-31.5487	0.3491	-33.6967	0.3453	-38.7982	0.342	-43.2285	0.3415	-43.8997	0.3401	-45.7792	0.3434	-41.349
		10.8333	0.3739	0.3582	-21.0772	0.3554	-24.8363	0.3503	-31.683	0.3479	-34.905	0.3455	-38.127	0.3416	-43.3627	0.3419	-42.96	0.3396	-46.0478	0.3427	-41.886
		10.9167	0.3737	0.3591	-19.6005	0.3555	-24.4335	0.3502	-31.5487	0.3479	-34.6365	0.3448	-38.7982	0.3417	-42.96	0.3413	-43.497	0.3399	-45.3765	0.3427	-41.6175
		11	0.3739	0.3583	-20.943	0.3558	-24.2993	0.3505	-31.4145	0.3481	-34.6365	0.3447	-39.201	0.3418	-43.0943	0.3411	-44.034	0.3392	-46.5848	0.342	-42.8257
		11.0833	0.3742	0.3582	-21.48	0.3544	-26.5815	0.3498	-32.757	0.3482	-34.905	0.3448	-39.4695	0.3415	-43.8997	0.3409	-44.7052	0.3393	-46.8532	0.3423	-42.8257
		11.1667	0.3735	0.3581	-20.6745	0.3545	-25.5075	0.3498	-31.8173	0.348	-34.2338	0.3446	-38.7982	0.3412	-43.3627	0.3407	-44.034	0.3402	-44.7052	0.3422	-42.0202
		11.25	0.3732	0.3584	-19.869	0.3547	-24.8362	0.3505	-30.4748	0.3472	-34.905	0.3442	-38.9325	0.3418	-42.1545	0.3401	-44.4367	0.339	-45.9135	0.3413	-42.8257
		11.3333	0.3738	0.3578	-21.48	0.355	-25.239	0.3492	-33.0255	0.3476	-35.1735	0.3445	-39.3353	0.3411	-43.8998	0.3398	-45.645	0.3395	-46.0478	0.3418	-42.96
		11.4167	0.3743	0.3577	-22.2855	0.3551	-25.776	0.3494	-33.4283	0.3474	-36.1133	0.3436	-41.2148	0.3418	-43.6313	0.3397	-46.4505	0.3397	-46.4505	0.3411	-44.571
		11.5	0.3745	0.3581	-22.017	0.3556	-25.3732	0.3497	-33.294	0.3472	-36.6502	0.3441	-40.812	0.3409	-45.108	0.3394	-47.1218	0.3389	-47.793	0.3412	-44.7052
		11.5833	0.3731	0.3574	-21.0772	0.3537	-26.0445	0.35	-31.0118	0.347	-35.0393	0.3436	-39.6037	0.3403	-44.034	0.3397	-44.8395	0.3389	-45.9135	0.3406	-43.6312
		11.6667	0.3737	0.3579	-21.2115	0.3542	-26.1787	0.3491	-33.0255	0.3471	-35.7105	0.3437	-40.275	0.3399	-45.3765	0.3399	-45.3765	0.3384	-47.3902	0.3405	-44.571
		11.75	0.3737	0.3578	-21.3457	0.3541	-26.313	0.3487	-33.5625	0.346	-37.1873	0.3432	-40.9462	0.34	-45.2422	0.3386	-47.1217	0.3384	-47.3902	0.3401	-45.108
		11.8333	0.3732	0.358	-20.406	0.3547	-24.8362	0.3493	-32.0857	0.346	-36.516	0.343	-40.5435	0.3405	-43.8997	0.3388	-46.182	0.3389	-46.0478	0.34	-44.571
		11.9167	0.374	0.3574	-22.2855	0.3541	-26.7157	0.3495	-32.8913	0.3465	-36.9188	0.3432	-41.349	0.3394	-46.4505	0.3386	-47.5245	0.3379	-48.4643	0.3405	-44.9737
		12	0.3741	0.3584	-21.0772	0.3535	-27.6555	0.3491	-33.5625	0.3459	-37.8585	0.3427	-42.1545	0.3397	-46.182	0.3387	-47.5245	0.338	-48.4642	0.34	-45.7792
		12.0833	0.3741	0.3571	-22.8225	0.3532	-28.0582	0.3485	-34.368	0.3463	-37.3215	0.3428	-42.0202	0.3392	-46.8532	0.3385	-47.793	0.3373	-49.404	0.3392	-46.8532
		12.1667	0.3737	0.358	-21.0772	0.3532	-27.5212	0.3488	-33.4282	0.3458	-37.4557	0.3434	-40.6777	0.3388	-46.8532	0.3383	-47.5245	0.3373	-48.867	0.3389	-46.719
		12.25	0.3736	0.3572	-22.017	0.3539	-26.4472	0.3477	-34.7707	0.3459	-37.1873	0.3433	-40.6777	0.339	-46.4505	0.3378	-48.0615	0.3365	-49.8067	0.3393	-46.0478
		12.3333	0.3742	0.3578	-22.017	0.3535	-27.7897	0.3485	-34.5022	0.3452	-38.9325	0.3424	-42.6915	0.3386	-47.793	0.3383	-48.1957	0.3362	-51.015	0.3389	-47.3902
		12.4167	0.3741	0.3574	-22.4197	0.3542	-26.7157	0.3481	-34.905	0.3454	-38.5298	0.3425	-42.423	0.3387	-47.5245	0.3376	-49.0012	0.3365	-50.478	0.3392	-46.8532
		12.5	0.3736	0.3584	-20.406	0.3529	-27.7897	0.3485	-33.6968	0.345	-38.3955	0.3422	-42.1545	0.3391	-46.3162	0.3375	-48.4642	0.3355	-51.1492	0.3386	-46.9875
		12.5833	0.3732	0.3575	-21.0772	0.3537	-26.1787	0.3476	-34.368	0.345	-37.8585	0.3428	-40.812	0.3385	-46.5847	0.3373	-48.1957	0.336	-49.941	0.338	-47.256
		12.6667	0.3741	0.357	-22.9568	0.3536	-27.5212	0.3477	-35.442	0.3459	-37.8585	0.3423	-42.6915	0.3389	-47.256	0.3369	-49.941	0.3356	-51.6862	0.3381	-48.33
		12.75	0.374	0.3565	-23.4938	0.3536	-27.387	0.348	-34.905	0.3454	-38.3955	0.3415	-43.6312	0.3378	-48.5985	0.3365	-50.3437	0.3351	-52.2232	0.338	-48.33
		12.8333	0.3738	0.3567	-22.9568	0.3533	-27.5213	0.348	-34.6365	0.3443	-39.6038	0.3416	-43.2285	0.3384	-47.5245	0.3366	-49.941	0.335	-52.089	0.3382	-47.793
		12.9167	0.374	0.3567	-23.2252	0.3527	-28.5952	0.3469	-36.3818	0.3444	-39.738	0.3418	-43.2285	0.338	-48.33	0.3366	-50.2095	0.3349	-52.4918	0.3378	-48.5985
		13	0.3734	0.3568	-22.2855	0.3533	-26.9843	0.3476	-34.6365	0.3446	-38.664	0.3412	-43.2285	0.3377	-47.9273	0.3364	-49.6725	0.3351	-51.4177	0.3374	-48.33
		13.0833	0.374	0.3558	-24.4335	0.3537	-27.2527	0.3475	-35.5763	0.3445	-39.6038	0.3417	-43.3627	0.3368	-49.941	0.336	-51.015	0.3346	-52.8945	0.3379	-48.4643
		13.1667	0.3736	0.3563	-23.2252	0.3524	-28.461	0.3465	-36.3818	0.3447	-38.7982	0.3419	-42.5573	0.3375	-48.4642	0.3359	-50.6123	0.3346	-52.3575	0.3374	-48.5985
		13.25	0.3739	0.3563	-23.628	0.3527	-28.461	0.347	-36.1133	0.3441	-40.0065	0.3412	-43.8998	0.3375	-48.867	0.3362	-50.6123	0.3345	-52.8945	0.3368	-49.8068
		13.3333	0.3736	0.3561	-23.4937	0.3533	-27.2527	0.3467	-36.1132	0.3442	-39.4695	0.3413	-43.3627	0.3363	-50.0752	0.3362	-50.2095	0.3345	-52.4917	0.3367	-49.5382
		13.4167	0.3736	0.3558	-23.8965	0.3519	-29.1322	0.3463	-36.6502	0.3437	-40.1407	0.3408	-44.034	0.3375	-48.4642	0.3361	-50.3437	0.3344	-52.626	0.3364	-49.941
		13.5	0.3741	0.3567	-23.3595	0.352	-29.6693	0.3471	-36.2475	0.3433	-41.349	0.3414	-43.8998	0.3374	-49.2698	0.3361	-51.015	0.3351	-52.3575	0.3364	-50.6123
		13.5833	0.3735	0.3556	-24.0307	0.3525	-28.1925	0.3464	-36.3818	0.3436	-40.1407	0.3406	-44.1682	0.3363	-49.941	0.3353	-51.2835	0.3346	-52.2232	0.3385	-46.9875
		13.6667	0.3744	0.3561	-24.5677	0.352	-30.072	0.3466	-37.3215	0.3432	-41.886	0.341	-44.8395	0.3362	-51.2835	0.3349	-53.0288	0.3344	-53.7	0.3371	-50.0752
		13.75	0.3743	0.3564	-24.0308	0.3522	-29.6693	0.3458	-38.2613	0.344	-40.6778	0.3397	-46.4505	0.3359	-51.552	0.3351	-52.626	0.3347	-53.163	0.3363	-51.015
		13.8333	0.3727	0.356	-22.4197	0.3512	-28.8637	0.3457	-36.2475	0.3431	-39.738	0.3402	-43.6312	0.3357	-49.6725	0.3354	-50.0752	0.3342	-51.6862	0.3354	-50.0752
		13.9167	0.3732	0.3561	-22.9567	0.3519	-28.5952	0.3461	-36.3817	0.3435	-39.8722	0.34	-44.571	0.336	-49.941	0.3349	-51.4177	0.334	-52.626	0.3352	-51.015
		14	0.3738	0.3558	-24.165	0.3517	-29.6693	0.3465	-36.6503	0.343	-41.349	0.3396	-45.9135	0.3359	-50.8808	0.334	-53.4315	0.3337	-53.8343	0.335	-52.089
		14.0833	0.3733	0.3565	-22.554	0.3519	-28.7295	0.3454	-37.4558	0.3434	-40.1408	0.3389	-46.182	0.3355	-50.7465	0.3347	-51.8205	0.3339	-52.8945	0.335	-51.4177
		14.1667	0.374	0.3555	-24.8363	0.351	-30.8775	0.346	-37.59	0.343	-41.6175	0.3394	-46.4505	0.3353	-51.9548	0.3339	-53.8343	0.3334	-54.5055	0.3347	-52.7603
		14.25	0.3741	0.356	-24.2993	0.3511	-30.8775	0.3456	-38.2612	0.3429	-41.886	0.3392	-46.8532	0.3352	-52.2232	0.3337	-54.237	0.3329	-55.311	0.334	-53.8342
		14.3333	0.3732	0.355	-24.4335	0.3508	-30.072	0.3449	-37.9927	0.3425	-41.2147	0.3395	-45.2422	0.3349	-51.4177	0.3337	-53.0287	0.333	-53.9685	0.3348	-51.552
		14.4167	0.374	0.3547	-25.9102	0.3512	-30.609	0.3452	-38.664	0.3426	-42.1545	0.3388	-47.256	0.3349	-52.4918	0.3337	-54.1028	0.3323	-55.9823	0.3344	-53.163
		14.5	0.3736	0.3547	-25.3732	0.3508	-30.609	0.3449	-38.5298	0.3422	-42.1545	0.3385	-47.1217	0.3346	-52.3575	0.3326	-55.0425	0.3326	-55.0425	0.3341	-53.0287
		14.5833	0.3729	0.355	-24.0308	0.3507	-29.8035	0.3447	-37.8585	0.3419	-41.6175	0.3383	-46.4505	0.3344	-51.6863	0.3325	-54.237	0.3319	-55.0425	0.3339	-52.3575
		14.6667	0.3738	0.3546	-25.776	0.3507	-31.0118	0.3447	-39.0668	0.3419	-42.8258	0.338	-48.0615	0.3342	-53.163	0.3327	-55.1768	0.3319	-56.2508	0.3337	-53.8343
		14.75	0.3734	0.3555	-24.0308	0.3501	-31.2802	0.345	-38.127	0.3416	-42.6915	0.3383	-47.1218	0.3336	-53.4315	0.3333	-53.8343	0.3316	-56.1165	0.3338	-53.163
		14.8333	0.3734	0.3548	-24.9705	0.3504	-30.8775	0.3451	-37.9927	0.3425	-41.4832	0.3382	-47.256	0.3343	-52.4918	0.3329	-54.3713	0.3312	-56.6535	0.3328	-54.5055
		14.9167	0.3729	0.3546	-24.5677	0.3506	-29.9377	0.3455	-36.7845	0.342	-41.4832	0.3377	-47.256	0.3341	-52.089	0.3324	-54.3713	0.331	-56.2507	0.3333	-53.163
		15	0.3738	0.3544	-26.0445	0.3503	-31.5488	0.3451	-38.5298	0.3418	-42.96	0.338	-48.0615	0.3334	-54.237	0.3321	-55.9823	0.3304	-58.2645	0.3327	-55.1768
		15.0833	0.3733	0.3552	-24.2993	0.3505	-30.609	0.3443	-38.9325	0.341	-43.3627	0.3377	-47.793	0.3336	-53.2973	0.332	-55.4453	0.3313	-56.385	0.3325	-54.774
		15.1667	0.3731	0.3549	-24.4335	0.3505	-30.3405	0.3445	-38.3955	0.3409	-43.2285	0.338	-47.1217	0.3329	-53.9685	0.3311	-56.385	0.3309	-56.6535	0.3333	-53.4315
		15.25	0.374	0.3545	-26.1788	0.3499	-32.3543	0.3435	-40.9462	0.3408	-44.571	0.3369	-49.8068	0.3336	-54.237	0.3314	-57.1905	0.3306	-58.2645	0.3322	-56.1165
		15.3333	0.3736	0.3543	-25.9102	0.3498	-31.9515	0.3443	-39.3352	0.3405	-44.4367	0.3372	-48.867	0.3325	-55.1767	0.3312	-56.922	0.3302	-58.2645	0.332	-55.848
		15.4167	0.3737	0.3543	-26.0445	0.3496	-32.3542	0.3444	-39.3352	0.3415	-43.2285	0.3372	-49.0012	0.3326	-55.1767	0.3314	-56.7878	0.3303	-58.2645	0.3323	-55.5795
		15.5	0.3741	0.3545	-26.313	0.3493	-33.294	0.3437	-40.812	0.3403	-45.3765	0.3372	-49.5382	0.3326	-55.7137	0.3315	-57.1905	0.33	-59.2042	0.3328	-55.4453
		15.5833	0.3734	0.3541	-25.9102	0.3496	-31.9515	0.3438	-39.738	0.3409	-43.6313	0.3367	-49.2698	0.333	-54.237	0.3307	-57.3248	0.3304	-57.7275	0.3321	-55.4453
		15.6667	0.3726	0.3541	-24.8362	0.3504	-29.8035	0.3436	-38.9325	0.34	-43.7655	0.3369	-47.9273	0.3321	-54.3712	0.3305	-56.5192	0.3298	-57.459	0.3322	-54.237
		15.75	0.3731	0.354	-25.6418	0.3488	-32.6227	0.3436	-39.6037	0.3399	-44.571	0.3365	-49.1355	0.332	-55.1767	0.3304	-57.3247	0.3301	-57.7275	0.3314	-55.9823
		15.8333	0.3735	0.3538	-26.4472	0.3495	-32.22	0.3429	-41.0805	0.3405	-44.3025	0.3365	-49.6725	0.3325	-55.0425	0.3304	-57.8617	0.3299	-58.533	0.3308	-57.3248
		15.9167	0.3731	0.3535	-26.313	0.349	-32.3543	0.3429	-40.5435	0.3402	-44.1682	0.3363	-49.404	0.3321	-55.0425	0.33	-57.8617	0.3303	-57.459	0.3308	-56.7878
		16	0.373	0.3543	-25.1047	0.3496	-31.4145	0.3432	-40.0065	0.3407	-43.3627	0.3365	-49.0012	0.3319	-55.1768	0.3302	-57.459	0.3304	-57.1905	0.3308	-56.6535
		16.0833	0.3735	0.354	-26.1788	0.3493	-32.4885	0.343	-40.9462	0.3401	-44.8395	0.3357	-50.7465	0.3315	-56.385	0.3301	-58.2645	0.33	-58.3987	0.3311	-56.922
		16.1667	0.3732	0.3537	-26.1787	0.349	-32.4885	0.3424	-41.349	0.3396	-45.108	0.3361	-49.8067	0.3318	-55.5795	0.3293	-58.9357	0.3295	-58.6672	0.3301	-57.8617
		16.25	0.3733	0.354	-25.9103	0.3489	-32.757	0.3422	-41.7518	0.3398	-44.9738	0.3358	-50.3438	0.3312	-56.5193	0.3299	-58.2645	0.3294	-58.9357	0.3297	-58.533
		16.3333	0.3731	0.3538	-25.9102	0.3492	-32.0857	0.3427	-40.812	0.339	-45.7792	0.3358	-50.0752	0.331	-56.5192	0.3298	-58.1303	0.3289	-59.3385	0.33	-57.8617
		16.4167	0.3726	0.3534	-25.776	0.3485	-32.3543	0.3425	-40.4092	0.3393	-44.7052	0.3355	-49.8067	0.332	-54.5055	0.3297	-57.5932	0.3291	-58.3987	0.3297	-57.5932
		16.5	0.3734	0.3538	-26.313	0.3488	-33.0255	0.3429	-40.9463	0.3392	-45.9135	0.336	-50.2095	0.3307	-57.3248	0.3295	-58.9357	0.3288	-59.8755	0.3295	-58.9357
		16.5833	0.3729	0.353	-26.7158	0.3487	-32.4885	0.3421	-41.349	0.3385	-46.182	0.3358	-49.8068	0.3306	-56.7878	0.3289	-59.07	0.3295	-58.2645	0.3294	-58.3987
		16.6667	0.373	0.353	-26.85	0.3481	-33.4282	0.3417	-42.0202	0.3389	-45.7793	0.3345	-51.6862	0.33	-57.7275	0.3285	-59.7412	0.3286	-59.607	0.3294	-58.533
		16.75	0.3725	0.3529	-26.313	0.349	-31.5488	0.3418	-41.2148	0.3384	-45.7793	0.3348	-50.6123	0.3306	-56.2507	0.3286	-58.9357	0.3282	-59.4728	0.3301	-56.922
		16.8333	0.3728	0.3528	-26.85	0.3484	-32.757	0.342	-41.349	0.3385	-46.0478	0.3347	-51.1493	0.3301	-57.3248	0.3287	-59.2043	0.3281	-60.0098	0.3286	-59.3385
		16.9167	0.3725	0.3531	-26.0445	0.348	-32.8913	0.3426	-40.1407	0.3383	-45.9135	0.3351	-50.2095	0.3303	-56.6535	0.3282	-59.4728	0.328	-59.7412	0.3284	-59.2042
		17	0.3725	0.3533	-25.776	0.3484	-32.3543	0.3418	-41.2148	0.3383	-45.9135	0.3347	-50.7465	0.3301	-56.922	0.3283	-59.3385	0.328	-59.7412	0.3286	-58.9357
		17.0833	0.3729	0.353	-26.7158	0.3484	-32.8913	0.3421	-41.349	0.3381	-46.719	0.3344	-51.6863	0.3298	-57.8618	0.328	-60.2782	0.3274	-61.0837	0.3285	-59.607
		17.1667	0.3732	0.3526	-27.6555	0.347	-35.1735	0.3422	-41.6175	0.3377	-47.6587	0.3339	-52.7603	0.3295	-58.6672	0.3278	-60.9495	0.3266	-62.5605	0.3289	-59.4727
		17.25	0.3723	0.3527	-26.313	0.3485	-31.9515	0.3419	-40.812	0.3378	-46.3163	0.3341	-51.2835	0.3295	-57.459	0.3281	-59.3385	0.3269	-60.9495	0.3278	-59.7413
		17.3333	0.3724	0.3534	-25.5075	0.3477	-33.1598	0.3409	-42.2888	0.339	-44.8395	0.3336	-52.089	0.3292	-57.996	0.3276	-60.144	0.3268	-61.218	0.3274	-60.4125
		17.4167	0.373	0.3531	-26.7157	0.3482	-33.294	0.3412	-42.6915	0.3377	-47.3902	0.3339	-52.4918	0.3287	-59.4728	0.3276	-60.9495	0.3265	-62.4262	0.3285	-59.7412
		17.5	0.3728	0.3523	-27.5213	0.3477	-33.6968	0.3416	-41.886	0.3374	-47.5245	0.3341	-51.9548	0.3283	-59.7413	0.3272	-61.218	0.326	-62.829	0.3269	-61.6208
		17.5833	0.3727	0.3524	-27.2527	0.3471	-34.368	0.3407	-42.96	0.3375	-47.256	0.3336	-52.4917	0.3289	-58.8015	0.3267	-61.755	0.3256	-63.2317	0.3286	-59.2042
		17.6667	0.3721	0.3523	-26.5815	0.3469	-33.831	0.3409	-41.886	0.3375	-46.4505	0.3331	-52.3575	0.3284	-58.6672	0.3267	-60.9495	0.3257	-62.292	0.3276	-59.7412
		17.75	0.3728	0.3526	-27.1185	0.3472	-34.368	0.3401	-43.8998	0.3375	-47.3902	0.3328	-53.7	0.3298	-57.7275	0.3262	-62.5605	0.3261	-62.6948	0.327	-61.4865
		17.8333	0.3723	0.3526	-26.4472	0.3478	-32.8913	0.341	-42.0202	0.3366	-47.9273	0.3336	-51.9548	0.3285	-58.8015	0.3266	-61.3523	0.3257	-62.5605	0.3266	-61.3523
		17.9167	0.3726	0.3515	-28.3268	0.3471	-34.2337	0.3409	-42.5573	0.3371	-47.6587	0.3328	-53.4315	0.3281	-59.7412	0.3255	-63.2317	0.3261	-62.4262	0.3261	-62.4262
		18	0.3728	0.3524	-27.387	0.3471	-34.5022	0.3403	-43.6313	0.3369	-48.1958	0.333	-53.4315	0.3284	-59.607	0.3258	-63.0975	0.3257	-63.2318	0.3266	-62.0235
		18.0833	0.3729	0.3519	-28.1925	0.3473	-34.368	0.3401	-44.034	0.3368	-48.4643	0.3326	-54.1028	0.3277	-60.681	0.3256	-63.5003	0.3259	-63.0975	0.3265	-62.292
		18.1667	0.3731	0.3518	-28.5952	0.3465	-35.7105	0.3397	-44.8395	0.3369	-48.5985	0.3321	-55.0425	0.3283	-60.144	0.3259	-63.366	0.3258	-63.5003	0.3259	-63.366
		18.25	0.3727	0.3518	-28.0582	0.3465	-35.1735	0.3403	-43.497	0.3359	-49.404	0.333	-53.2972	0.3278	-60.2782	0.326	-62.6947	0.3262	-62.4262	0.325	-64.0372
		18.3333	0.3726	0.3511	-28.8637	0.3464	-35.1735	0.3398	-44.034	0.3364	-48.5985	0.3327	-53.5657	0.3274	-60.681	0.3254	-63.366	0.3253	-63.5003	0.325	-63.903
		18.4167	0.3729	0.3517	-28.461	0.3466	-35.3077	0.3401	-44.034	0.3356	-50.0752	0.332	-54.9082	0.3271	-61.4865	0.3251	-64.1715	0.3256	-63.5003	0.3252	-64.0373
		18.5	0.3721	0.3517	-27.387	0.3468	-33.9652	0.3396	-43.6312	0.3362	-48.1957	0.3321	-53.7	0.3272	-60.2782	0.3249	-63.366	0.3246	-63.7687	0.3257	-62.292
		18.5833	0.3722	0.3515	-27.7897	0.3463	-34.7707	0.3401	-43.0942	0.3363	-48.1957	0.3315	-54.6397	0.3272	-60.4125	0.3245	-64.0372	0.3247	-63.7687	0.3245	-64.0372
		18.6667	0.3725	0.3514	-28.3268	0.3463	-35.1735	0.3397	-44.034	0.3354	-49.8068	0.3317	-54.774	0.3267	-61.4865	0.3243	-64.7085	0.3246	-64.3058	0.3252	-63.5003
		18.75	0.3727	0.3511	-28.998	0.346	-35.8448	0.3395	-44.571	0.3362	-49.0012	0.3314	-55.4453	0.3268	-61.6208	0.324	-65.3797	0.3246	-64.5742	0.3252	-63.7687
		18.8333	0.3723	0.3506	-29.1322	0.3465	-34.6365	0.3391	-44.571	0.3358	-49.0013	0.3313	-55.0425	0.3272	-60.5468	0.3241	-64.7085	0.3241	-64.7085	0.3243	-64.44
		18.9167	0.3723	0.3511	-28.461	0.3457	-35.7105	0.3398	-43.6313	0.3357	-49.1355	0.3309	-55.5795	0.3263	-61.755	0.3241	-64.7085	0.3233	-65.7825	0.3239	-64.977
		19	0.3732	0.3515	-29.1322	0.3456	-37.053	0.3389	-46.0478	0.3354	-50.7465	0.3311	-56.5192	0.3262	-63.0975	0.3238	-66.3195	0.3232	-67.125	0.3241	-65.9167
		19.0833	0.3731	0.3506	-30.2062	0.3456	-36.9187	0.3389	-45.9135	0.3353	-50.7465	0.3309	-56.6535	0.3262	-62.9633	0.3239	-66.051	0.3231	-67.125	0.3243	-65.514
		19.1667	0.3718	0.351	-27.924	0.3453	-35.5763	0.3391	-43.8998	0.3345	-50.0752	0.3313	-54.3713	0.326	-61.4865	0.3238	-64.44	0.3228	-65.7825	0.3246	-63.366
		19.25	0.3729	0.3509	-29.535	0.3463	-35.7105	0.3392	-45.2423	0.3351	-50.7465	0.331	-56.2507	0.3259	-63.0975	0.3233	-66.588	0.3231	-66.8565	0.3237	-66.051
		19.3333	0.3727	0.3498	-30.7432	0.3448	-37.4557	0.3394	-44.7052	0.3353	-50.2095	0.3304	-56.7877	0.3255	-63.366	0.3238	-65.6483	0.3227	-67.125	0.3238	-65.6483
		19.4167	0.3727	0.3502	-30.2062	0.3447	-37.59	0.3392	-44.9737	0.3347	-51.015	0.3301	-57.1905	0.3259	-62.829	0.3232	-66.4537	0.3222	-67.7962	0.3232	-66.4537
		19.5	0.3718	0.3503	-28.8638	0.3453	-35.5763	0.3383	-44.9738	0.3347	-49.8068	0.3303	-55.7138	0.3252	-62.5605	0.3232	-65.2455	0.3217	-67.2593	0.3227	-65.9168
		19.5833	0.3724	0.35	-30.072	0.3458	-35.7105	0.339	-44.8395	0.3346	-50.7465	0.33	-56.922	0.3258	-62.5605	0.3229	-66.4537	0.3227	-66.7223	0.3226	-66.8565
		19.6667	0.3722	0.35	-29.8035	0.3452	-36.2475	0.3384	-45.3765	0.3349	-50.0752	0.3297	-57.0562	0.3247	-63.7687	0.3226	-66.588	0.3217	-67.7962	0.3223	-66.9908
		19.75	0.3718	0.3501	-29.1322	0.3443	-36.9188	0.3385	-44.7052	0.3343	-50.3438	0.3301	-55.9823	0.3247	-63.2318	0.3225	-66.1853	0.3217	-67.2593	0.322	-66.8565
		19.8333	0.3718	0.3498	-29.535	0.346	-34.6365	0.3374	-46.182	0.3344	-50.2095	0.3297	-56.5193	0.3245	-63.5003	0.322	-66.8565	0.3212	-67.9305	0.3228	-65.7825
		19.9167	0.3726	0.3498	-30.609	0.3453	-36.6502	0.3381	-46.3162	0.3346	-51.015	0.3298	-57.459	0.3244	-64.7085	0.3223	-67.5278	0.3211	-69.1387	0.3227	-66.9908
		20	0.372	0.3499	-29.6693	0.3445	-36.9188	0.3379	-45.7793	0.3346	-50.2095	0.3293	-57.3248	0.3239	-64.5742	0.3224	-66.588	0.3213	-68.0648	0.3217	-67.5278
		20.0833	0.3725	0.3495	-30.8775	0.3443	-37.8585	0.3372	-47.3902	0.3346	-50.8807	0.3296	-57.5932	0.3246	-64.3058	0.3226	-66.9908	0.3214	-68.6017	0.3218	-68.0648
		20.1667	0.3725	0.3498	-30.4748	0.3439	-38.3955	0.3372	-47.3902	0.3337	-52.089	0.3296	-57.5932	0.3238	-65.3798	0.3216	-68.3332	0.321	-69.1387	0.322	-67.7962
		20.25	0.3716	0.3497	-29.4007	0.345	-35.7105	0.3378	-45.3765	0.3333	-51.4177	0.3291	-57.0562	0.3239	-64.0372	0.3214	-67.3935	0.3213	-67.5278	0.3223	-66.1853
		20.3333	0.3728	0.3488	-32.22	0.3442	-38.3955	0.3376	-47.256	0.3336	-52.626	0.3289	-58.9357	0.3241	-65.3798	0.3212	-69.273	0.321	-69.5415	0.3216	-68.736
		20.4167	0.372	0.3491	-30.7432	0.344	-37.59	0.3371	-46.8532	0.3336	-51.552	0.3284	-58.533	0.324	-64.44	0.3214	-67.9305	0.3201	-69.6757	0.3211	-68.3332
		20.5	0.3719	0.3494	-30.2063	0.3439	-37.59	0.3371	-46.719	0.3332	-51.9548	0.3286	-58.1303	0.3241	-64.1715	0.3211	-68.199	0.3206	-68.8703	0.3209	-68.4675
		20.5833	0.3722	0.3494	-30.609	0.3438	-38.127	0.337	-47.256	0.3336	-51.8205	0.3281	-59.2042	0.324	-64.7085	0.3212	-68.4675	0.3206	-69.273	0.3207	-69.1387
		20.6667	0.3725	0.3495	-30.8775	0.3436	-38.7982	0.3369	-47.793	0.3332	-52.7603	0.329	-58.3987	0.323	-66.4537	0.321	-69.1387	0.3204	-69.9442	0.3204	-69.9442
		20.75	0.3727	0.3486	-32.3542	0.3446	-37.7242	0.3371	-47.793	0.3327	-53.7	0.3287	-59.07	0.3232	-66.4537	0.3204	-70.2127	0.3199	-70.884	0.32	-70.7497
		20.8333	0.3721	0.3491	-30.8775	0.3436	-38.2612	0.3361	-48.33	0.3329	-52.626	0.3282	-58.9357	0.3228	-66.1853	0.3209	-68.736	0.3198	-70.2128	0.3202	-69.6757
		20.9167	0.3724	0.3489	-31.5488	0.3438	-38.3955	0.3364	-48.33	0.3328	-53.163	0.3282	-59.3385	0.3231	-66.1853	0.3203	-69.9443	0.3194	-71.1525	0.3198	-70.6155
		21	0.3721	0.3489	-31.146	0.3434	-38.5298	0.3365	-47.793	0.3323	-53.4315	0.3275	-59.8755	0.3224	-66.7222	0.3199	-70.0785	0.3197	-70.347	0.3196	-70.4812
		21.0833	0.3714	0.3488	-30.3405	0.343	-38.127	0.3359	-47.6588	0.3328	-51.8205	0.3277	-58.6673	0.3229	-65.1112	0.3204	-68.4675	0.3191	-70.2128	0.3196	-69.5415
		21.1667	0.3726	0.349	-31.683	0.3431	-39.6037	0.3363	-48.7327	0.3326	-53.7	0.3281	-59.7412	0.3223	-67.5278	0.3199	-70.7497	0.3191	-71.8237	0.3196	-71.1525
		21.25	0.3723	0.3486	-31.8173	0.3432	-39.0668	0.3363	-48.33	0.3318	-54.3713	0.3271	-60.681	0.3223	-67.125	0.3194	-71.0183	0.3184	-72.3608	0.319	-71.5553
		21.3333	0.3717	0.3486	-31.0117	0.3431	-38.3955	0.3359	-48.0615	0.3321	-53.163	0.3277	-59.07	0.3222	-66.4537	0.3196	-69.9442	0.3179	-72.2265	0.3194	-70.2127
		21.4167	0.3713	0.349	-29.9378	0.342	-39.3352	0.336	-47.3902	0.3318	-53.0288	0.3274	-58.9357	0.3218	-66.4538	0.3194	-69.6757	0.3183	-71.1525	0.319	-70.2128
		21.5	0.3721	0.3484	-31.8173	0.3429	-39.201	0.3358	-48.7327	0.332	-53.8342	0.3274	-60.0097	0.322	-67.2592	0.3193	-70.884	0.3176	-73.1662	0.3191	-71.1525
		21.5833	0.3711	0.3489	-29.8035	0.3425	-38.3955	0.3355	-47.793	0.3313	-53.4315	0.327	-59.2042	0.3219	-66.051	0.319	-69.9442	0.3177	-71.6895	0.3188	-70.2128
		21.6667	0.3716	0.3477	-32.0857	0.3427	-38.7982	0.3355	-48.4642	0.3315	-53.8342	0.3267	-60.2782	0.3216	-67.125	0.3186	-71.1525	0.3177	-72.3608	0.3186	-71.1525
		21.75	0.3716	0.3485	-31.0118	0.343	-38.3955	0.3355	-48.4642	0.3311	-54.3712	0.3268	-60.144	0.3214	-67.3935	0.3188	-70.884	0.3179	-72.0922	0.3187	-71.0183
		21.8333	0.3712	0.3487	-30.2062	0.3423	-38.7982	0.3364	-46.719	0.332	-52.626	0.3262	-60.4125	0.3209	-67.5277	0.3184	-70.884	0.317	-72.7635	0.3184	-70.884
		21.9167	0.3723	0.3486	-31.8173	0.3429	-39.4695	0.3355	-49.404	0.3314	-54.9083	0.3267	-61.218	0.3215	-68.199	0.3183	-72.495	0.3174	-73.7033	0.3183	-72.495
		22	0.3717	0.348	-31.8173	0.3425	-39.201	0.3351	-49.1355	0.3314	-54.1028	0.3264	-60.8152	0.3209	-68.199	0.318	-72.0922	0.3173	-73.032	0.3185	-71.421
		22.0833	0.372	0.3484	-31.683	0.3424	-39.738	0.335	-49.6725	0.3313	-54.6398	0.3257	-62.1578	0.3207	-68.8703	0.3181	-72.3608	0.3169	-73.9717	0.3183	-72.0922
		22.1667	0.3719	0.3491	-30.609	0.3423	-39.738	0.3352	-49.2698	0.3308	-55.1768	0.3263	-61.218	0.3209	-68.4675	0.3186	-71.5553	0.3168	-73.9717	0.3173	-73.3005
		22.25	0.3722	0.3486	-31.683	0.3423	-40.1407	0.3352	-49.6725	0.3308	-55.5795	0.3268	-60.9495	0.3204	-69.5415	0.318	-72.7635	0.3168	-74.3745	0.3174	-73.569
		22.3333	0.3723	0.3481	-32.4885	0.3418	-40.9463	0.3349	-50.2095	0.3302	-56.5193	0.3262	-61.8893	0.3201	-70.0785	0.318	-72.8978	0.3167	-74.643	0.3165	-74.9115
		22.4167	0.3723	0.3477	-33.0255	0.3412	-41.7518	0.3346	-50.6123	0.3308	-55.7138	0.3263	-61.755	0.3204	-69.6757	0.3178	-73.1662	0.3174	-73.7033	0.3169	-74.3745
		22.5	0.3717	0.3479	-31.9515	0.3417	-40.275	0.3347	-49.6725	0.3303	-55.5795	0.326	-61.3522	0.3201	-69.273	0.3172	-73.1662	0.3169	-73.569	0.3167	-73.8375
		22.5833	0.3719	0.3473	-33.0255	0.3418	-40.4093	0.3341	-50.7465	0.3302	-55.9823	0.3253	-62.5605	0.3202	-69.4073	0.3172	-73.4348	0.3163	-74.643	0.317	-73.7033
		22.6667	0.372	0.3477	-32.6227	0.3419	-40.4093	0.3341	-50.8807	0.33	-56.385	0.3254	-62.5605	0.32	-69.81	0.3173	-73.4347	0.3166	-74.3745	0.3168	-74.106
		22.75	0.3722	0.3478	-32.757	0.3419	-40.6777	0.3346	-50.478	0.3307	-55.7137	0.326	-62.0235	0.3199	-70.2127	0.317	-74.106	0.316	-75.4485	0.316	-75.4485
		22.8333	0.3719	0.3478	-32.3543	0.3412	-41.2148	0.3344	-50.3438	0.3307	-55.311	0.3253	-62.5605	0.3196	-70.2128	0.3169	-73.8375	0.3162	-74.7773	0.316	-75.0458
		22.9167	0.3727	0.3478	-33.4282	0.3418	-41.4832	0.3345	-51.2835	0.3293	-58.2645	0.3252	-63.7687	0.3198	-71.0183	0.3161	-75.9855	0.3152	-77.1937	0.316	-76.1197
			0.3719	0.3471	-33.294	0.3413	-41.0805	0.3336	-51.4177	0.3296	-56.7878	0.3249	-63.0975	0.3196	-70.2128	0.3161	-74.9115	0.3151	-76.254	0.3155	-75.717
			0.3719	0.3478	-32.3543	0.341	-41.4832	0.3334	-51.6863	0.3295	-56.922	0.325	-62.9633	0.3196	-70.2128	0.3163	-74.643	0.3154	-75.8512	0.3156	-75.5828
			0.3718	0.3481	-31.8173	0.3412	-41.0805	0.3337	-51.1493	0.3295	-56.7878	0.3247	-63.2318	0.3192	-70.6155	0.3163	-74.5087	0.3148	-76.5225	0.3154	-75.717
			0.3721	0.3467	-34.0995	0.3412	-41.4832	0.3341	-51.015	0.3294	-57.3247	0.3245	-63.903	0.319	-71.2867	0.3159	-75.4485	0.3145	-77.328	0.3158	-75.5827
			0.3718	0.3476	-32.4885	0.3411	-41.2148	0.3335	-51.4177	0.329	-57.459	0.3252	-62.5605	0.319	-70.884	0.3157	-75.3143	0.3144	-77.0595	0.3157	-75.3143
			0.3724	0.3481	-32.6227	0.3407	-42.5573	0.3342	-51.2835	0.3293	-57.8618	0.3248	-63.903	0.3189	-71.8237	0.3156	-76.254	0.3145	-77.7308	0.3156	-76.254
			0.3721	0.347	-33.6968	0.341	-41.7517	0.3335	-51.8205	0.3286	-58.3987	0.3238	-64.8428	0.3188	-71.5553	0.3155	-75.9855	0.3139	-78.1335	0.315	-76.6567
			0.3716	0.3475	-32.3543	0.3408	-41.349	0.3329	-51.9548	0.329	-57.1905	0.3244	-63.366	0.3184	-71.421	0.3151	-75.8512	0.3137	-77.7308	0.3151	-75.8512
			0.372	0.347	-33.5625	0.3407	-42.0202	0.333	-52.3575	0.3292	-57.459	0.3238	-64.7085	0.3187	-71.5553	0.3154	-75.9855	0.3142	-77.5965	0.3153	-76.1197
			0.3717	0.3467	-33.5625	0.342	-39.8722	0.3334	-51.4177	0.3289	-57.459	0.3238	-64.3058	0.3183	-71.6895	0.3152	-75.8512	0.3139	-77.5965	0.3145	-76.791
			0.3719	0.3462	-34.5022	0.3402	-42.5573	0.3329	-52.3575	0.3287	-57.996	0.3237	-64.7085	0.3181	-72.2265	0.3154	-75.8512	0.3136	-78.2678	0.3144	-77.1937
			0.3716	0.3459	-34.5022	0.3404	-41.886	0.3332	-51.552	0.3284	-57.996	0.3242	-63.6345	0.3179	-72.0922	0.3152	-75.717	0.3135	-77.9992	0.3142	-77.0595
			0.3717	0.3463	-34.0995	0.3406	-41.7517	0.3323	-52.8945	0.3283	-58.2645	0.3238	-64.3058	0.3178	-72.3607	0.3149	-76.254	0.3128	-79.0732	0.3146	-76.6567
			0.3718	0.3463	-34.2338	0.3399	-42.8258	0.3322	-53.163	0.3283	-58.3988	0.3235	-64.8428	0.3173	-73.1662	0.3146	-76.791	0.3129	-79.0733	0.3138	-77.865
			0.372	0.3469	-33.6968	0.3401	-42.8257	0.333	-52.3575	0.3282	-58.8015	0.3234	-65.2455	0.3174	-73.3005	0.3145	-77.1937	0.3129	-79.3417	0.314	-77.865
			0.3716	0.3458	-34.6365	0.3404	-41.886	0.3325	-52.4917	0.3277	-58.9357	0.323	-65.2455	0.3176	-72.495	0.3143	-76.9252	0.3123	-79.6102	0.3141	-77.1937
			0.3725	0.3459	-35.7105	0.3399	-43.7655	0.3327	-53.4315	0.3281	-59.607	0.323	-66.4537	0.3173	-74.106	0.3138	-78.8047	0.3127	-80.2815	0.3136	-79.0733
			0.3713	0.3464	-33.4283	0.3394	-42.8258	0.3319	-52.8945	0.3278	-58.3988	0.3227	-65.2455	0.3172	-72.6293	0.3142	-76.6568	0.3124	-79.0733	0.3136	-77.4623
			0.3718	0.3462	-34.368	0.3397	-43.0943	0.332	-53.4315	0.3275	-59.4728	0.3224	-66.3195	0.3171	-73.4348	0.3144	-77.0595	0.3122	-80.013	0.3131	-78.8048
			0.372	0.3462	-34.6365	0.3397	-43.3627	0.3326	-52.8945	0.3277	-59.4728	0.3231	-65.6483	0.317	-73.8375	0.3132	-78.939	0.3124	-80.013	0.3135	-78.5362
			0.3717	0.3461	-34.368	0.3395	-43.2285	0.3317	-53.7	0.328	-58.6672	0.3222	-66.4537	0.3161	-74.643	0.3133	-78.402	0.3124	-79.6102	0.3131	-78.6705
			0.371	0.3456	-34.0995	0.3392	-42.6915	0.3317	-52.7603	0.3275	-58.3987	0.3222	-65.514	0.3162	-73.569	0.3131	-77.7308	0.3119	-79.3417	0.3127	-78.2678
			0.3719	0.3455	-35.442	0.3389	-44.3025	0.3315	-54.237	0.328	-58.9357	0.3224	-66.4537	0.3162	-74.7773	0.3128	-79.3417	0.3119	-80.55	0.3124	-79.8787
			0.3725	0.3454	-36.3818	0.3393	-44.571	0.3317	-54.774	0.3269	-61.218	0.3215	-68.4675	0.3163	-75.4485	0.3131	-79.7445	0.3117	-81.624	0.3118	-81.4897
			0.3717	0.3458	-34.7707	0.3389	-44.034	0.3314	-54.1028	0.3269	-60.144	0.3219	-66.8565	0.3165	-74.106	0.3123	-79.7445	0.3113	-81.087	0.3124	-79.6102
			0.3717	0.3451	-35.7105	0.3392	-43.6312	0.3317	-53.7	0.3271	-59.8755	0.3222	-66.4537	0.3159	-74.9115	0.3121	-80.013	0.3112	-81.2212	0.3119	-80.2815
			0.3711	0.3461	-33.5625	0.3393	-42.6915	0.3311	-53.7	0.3267	-59.607	0.322	-65.9167	0.3157	-74.3745	0.3122	-79.0733	0.3116	-79.8787	0.3119	-79.476
			0.3711	0.3452	-34.7707	0.3387	-43.497	0.3314	-53.2973	0.3267	-59.607	0.3214	-66.7222	0.3159	-74.106	0.3121	-79.2075	0.3112	-80.4158	0.312	-79.3417
			0.3709	0.3454	-34.2338	0.3391	-42.6915	0.3313	-53.163	0.3269	-59.07	0.3217	-66.051	0.3154	-74.5087	0.3124	-78.5362	0.3105	-81.087	0.312	-79.0733
			0.3716	0.3453	-35.3077	0.3389	-43.8998	0.3309	-54.6397	0.3267	-60.2782	0.3214	-67.3935	0.3151	-75.8512	0.312	-80.013	0.3107	-81.7583	0.3113	-80.9527
			0.372	0.3454	-35.7105	0.3385	-44.9737	0.3312	-54.774	0.3263	-61.3523	0.3215	-67.7962	0.3156	-75.717	0.3119	-80.6842	0.3106	-82.4295	0.3116	-81.087
			0.3712	0.345	-35.1735	0.3382	-44.3025	0.3316	-53.163	0.3266	-59.8755	0.3219	-66.1852	0.315	-75.4485	0.3121	-79.3417	0.3105	-81.4897	0.3122	-79.2075
			0.3719	0.3451	-35.979	0.3387	-44.571	0.3307	-55.311	0.3263	-61.218	0.3216	-67.5278	0.3147	-76.791	0.3112	-81.4898	0.3099	-83.235	0.3109	-81.8925
			0.3719	0.345	-36.1133	0.3391	-44.034	0.3307	-55.311	0.3265	-60.9495	0.3211	-68.199	0.3147	-76.791	0.3112	-81.4898	0.3098	-83.3692	0.3112	-81.4898
			0.372	0.3451	-36.1132	0.339	-44.3025	0.3305	-55.7137	0.3265	-61.0837	0.3205	-69.1387	0.3149	-76.6567	0.3115	-81.2212	0.3094	-84.0405	0.3111	-81.7583
			0.3716	0.3447	-36.1132	0.3385	-44.4367	0.3306	-55.0425	0.3259	-61.3522	0.3208	-68.199	0.3147	-76.3883	0.3117	-80.4158	0.3095	-83.3692	0.3106	-81.8925
			0.3709	0.3446	-35.3077	0.3377	-44.571	0.3312	-53.2973	0.326	-60.2782	0.3205	-67.662	0.3145	-75.717	0.3108	-80.6842	0.3094	-82.5637	0.3109	-80.55
			0.3709	0.3446	-35.3077	0.3379	-44.3025	0.3306	-54.1028	0.3257	-60.681	0.3206	-67.5278	0.3145	-75.717	0.3108	-80.6842	0.3091	-82.9665	0.31	-81.7583
			0.3713	0.3448	-35.5763	0.3377	-45.108	0.3307	-54.5055	0.3255	-61.4865	0.3202	-68.6018	0.3144	-76.3883	0.3106	-81.4898	0.3087	-84.0405	0.3108	-81.2212
			0.3714	0.3452	-35.1735	0.338	-44.8395	0.3312	-53.9685	0.3255	-61.6208	0.3201	-68.8703	0.3141	-76.9253	0.3111	-80.9528	0.3091	-83.6378	0.31	-82.4295
			0.3719	0.3447	-36.516	0.3377	-45.9135	0.3303	-55.848	0.3256	-62.1578	0.32	-69.6757	0.3135	-78.402	0.3104	-82.5637	0.309	-84.4433	0.3099	-83.235
			0.3709	0.3438	-36.3818	0.3378	-44.4368	0.3301	-54.774	0.325	-61.6208	0.32	-68.3332	0.3144	-75.8512	0.3104	-81.2212	0.3084	-83.9062	0.3098	-82.0267
			0.3709	0.3452	-34.5022	0.3375	-44.8395	0.3305	-54.237	0.3252	-61.3523	0.3202	-68.0648	0.3141	-76.254	0.3105	-81.087	0.3084	-83.9062	0.3096	-82.2953
			0.3712	0.3444	-35.979	0.3374	-45.3765	0.3305	-54.6397	0.3248	-62.292	0.3199	-68.8702	0.3138	-77.0595	0.3104	-81.624	0.3086	-84.0405	0.3097	-82.5637
			0.372	0.3444	-37.053	0.3376	-46.182	0.3298	-56.6535	0.3246	-63.6345	0.32	-69.81	0.3139	-77.9992	0.3099	-83.3692	0.3084	-85.383	0.3094	-84.0405
			0.3712	0.3441	-36.3817	0.3375	-45.2422	0.3297	-55.7137	0.3247	-62.4262	0.3199	-68.8702	0.3137	-77.1937	0.3099	-82.2952	0.3084	-84.309	0.3089	-83.6377
			0.3708	0.3441	-35.8448	0.3376	-44.571	0.3299	-54.9082	0.325	-61.4865	0.3194	-69.0045	0.3132	-77.328	0.3096	-82.161	0.3084	-83.772	0.3091	-82.8323
			0.3715	0.3438	-37.1873	0.3378	-45.2423	0.3303	-55.311	0.3244	-63.2317	0.3196	-69.6757	0.3132	-78.2678	0.3098	-82.8322	0.3083	-84.846	0.3091	-83.772
			0.3727	0.3437	-38.9325	0.3376	-47.1217	0.3301	-57.1905	0.3242	-65.1112	0.3193	-71.6895	0.3133	-79.7445	0.3096	-84.7117	0.308	-86.8597	0.3083	-86.457
			0.3709	0.3443	-35.7105	0.3367	-45.9135	0.3294	-55.7137	0.3245	-62.292	0.3193	-69.273	0.3134	-77.1937	0.3093	-82.698	0.3082	-84.1748	0.3081	-84.309
			0.3714	0.3435	-37.4557	0.3371	-46.0478	0.3293	-56.5193	0.3241	-63.5003	0.319	-70.347	0.3134	-77.865	0.3092	-83.5035	0.3073	-86.0542	0.3083	-84.7117
			0.3711	0.3437	-36.7845	0.3375	-45.108	0.3296	-55.7137	0.3237	-63.6345	0.3187	-70.347	0.3127	-78.402	0.3092	-83.1008	0.3078	-84.9802	0.3085	-84.0405
			0.3716	0.3434	-37.8585	0.3371	-46.3162	0.329	-57.1905	0.3247	-62.9633	0.3185	-71.2867	0.3125	-79.3417	0.3092	-83.772	0.3074	-86.1885	0.3082	-85.1145
			0.3711	0.3438	-36.6502	0.3366	-46.3162	0.3291	-56.385	0.3235	-63.903	0.3186	-70.4812	0.3125	-78.6705	0.3088	-83.6377	0.3071	-85.92	0.3083	-84.309
			0.3712	0.3437	-36.9187	0.337	-45.9135	0.3291	-56.5192	0.3239	-63.5002	0.3183	-71.0182	0.3125	-78.8047	0.309	-83.5035	0.3071	-86.0542	0.3078	-85.1145
			0.371	0.3434	-37.053	0.3375	-44.9737	0.3284	-57.1905	0.3243	-62.6948	0.3184	-70.6155	0.312	-79.2075	0.3083	-84.1747	0.3065	-86.5913	0.3076	-85.1145
			0.3707	0.3437	-36.2475	0.3367	-45.645	0.329	-55.9822	0.3232	-63.7687	0.3183	-70.347	0.3119	-78.939	0.3085	-83.5035	0.3065	-86.1885	0.308	-84.1747
			0.3711	0.3433	-37.3215	0.3363	-46.719	0.3288	-56.7878	0.3233	-64.1715	0.3185	-70.6155	0.3115	-80.013	0.3084	-84.1747	0.306	-87.3967	0.3075	-85.383
			0.3714	0.3441	-36.6502	0.3368	-46.4505	0.3287	-57.3248	0.324	-63.6345	0.3184	-71.1525	0.3115	-80.4158	0.3085	-84.4433	0.3055	-88.4708	0.307	-86.457
			0.3706	0.3436	-36.2475	0.336	-46.4505	0.3283	-56.7878	0.3233	-63.5003	0.318	-70.6155	0.312	-78.6705	0.3083	-83.6377	0.3061	-86.5913	0.3075	-84.7117
			0.3707	0.3428	-37.4557	0.3356	-47.1217	0.3289	-56.1165	0.323	-64.0372	0.3181	-70.6155	0.3113	-79.7445	0.3076	-84.7117	0.3055	-87.531	0.3068	-85.7857
			0.3714	0.3429	-38.2613	0.3365	-46.8532	0.3285	-57.5932	0.3235	-64.3058	0.3188	-70.6155	0.3113	-80.6842	0.3079	-85.2488	0.3055	-88.4708	0.3071	-86.3228
			0.3705	0.3431	-36.7845	0.336	-46.3162	0.3284	-56.5192	0.323	-63.7687	0.3179	-70.6155	0.3114	-79.3417	0.308	-83.9062	0.3057	-86.994	0.3066	-85.7858
			0.371	0.3431	-37.4557	0.3357	-47.3902	0.328	-57.7275	0.3234	-63.903	0.3174	-71.958	0.3111	-80.4158	0.3078	-84.846	0.3056	-87.7995	0.3075	-85.2488
			0.3709	0.3429	-37.59	0.336	-46.8532	0.3281	-57.459	0.3227	-64.7085	0.3173	-71.958	0.3112	-80.1473	0.3074	-85.2488	0.3053	-88.068	0.3067	-86.1885
			0.3716	0.3426	-38.9325	0.3358	-48.0615	0.3284	-57.996	0.3225	-65.9167	0.3172	-73.032	0.3111	-81.2212	0.3077	-85.7858	0.3053	-89.0077	0.3062	-87.7995
			0.3711	0.3423	-38.664	0.3359	-47.256	0.3275	-58.533	0.323	-64.5742	0.3171	-72.495	0.3109	-80.8185	0.3069	-86.1885	0.3046	-89.2763	0.3067	-86.457
			0.3713	0.3432	-37.7243	0.3352	-48.4643	0.3276	-58.6673	0.3223	-65.7825	0.3175	-72.2265	0.3102	-82.0268	0.3071	-86.1885	0.3052	-88.7392	0.3057	-88.068
			0.3712	0.3425	-38.5297	0.3354	-48.0615	0.3275	-58.6672	0.3223	-65.6483	0.3168	-73.032	0.3105	-81.4897	0.3075	-85.5172	0.3046	-89.4105	0.3061	-87.3967
			0.3716	0.3423	-39.3352	0.3348	-49.404	0.327	-59.8755	0.322	-66.588	0.3167	-73.7033	0.3105	-82.0267	0.3076	-85.92	0.3047	-89.8132	0.3054	-88.8735
			0.3712	0.3422	-38.9325	0.3352	-48.33	0.3286	-57.1905	0.3221	-65.9167	0.3168	-73.032	0.3104	-81.624	0.3066	-86.7255	0.3047	-89.2762	0.306	-87.531
			0.3719	0.3423	-39.738	0.3354	-49.0013	0.3273	-59.8755	0.3218	-67.2593	0.3167	-74.106	0.3103	-82.698	0.3066	-87.6653	0.3046	-90.3503	0.3052	-89.5447
			0.3717	0.3426	-39.0667	0.3353	-48.867	0.3271	-59.8755	0.3219	-66.8565	0.3165	-74.106	0.31	-82.8322	0.3065	-87.531	0.304	-90.8872	0.3054	-89.0077
			0.3712	0.3424	-38.664	0.3347	-49.0012	0.3272	-59.07	0.3217	-66.4537	0.3158	-74.3745	0.3099	-82.2952	0.3062	-87.2625	0.3046	-89.4105	0.3057	-87.9337
			0.3722	0.3421	-40.4092	0.3348	-50.2095	0.3268	-60.9495	0.3219	-67.5277	0.3164	-74.9115	0.3099	-83.6377	0.3061	-88.7392	0.3044	-91.0215	0.3049	-90.3502
			0.3707	0.3418	-38.7982	0.3344	-48.7327	0.3269	-58.8015	0.3219	-65.514	0.3161	-73.3005	0.3092	-82.5637	0.3057	-87.2625	0.3044	-89.0077	0.3052	-87.9337
			0.371	0.3425	-38.2612	0.3345	-49.0012	0.3266	-59.607	0.3219	-65.9167	0.3162	-73.569	0.3099	-82.0267	0.306	-87.2625	0.304	-89.9475	0.3054	-88.068
			0.3708	0.3425	-37.9927	0.3346	-48.5985	0.3269	-58.9357	0.3209	-66.9908	0.3163	-73.1662	0.3099	-81.7583	0.3054	-87.7995	0.3038	-89.9475	0.3059	-87.1283
			0.3705	0.3419	-38.3955	0.3353	-47.256	0.3268	-58.6673	0.321	-66.4537	0.3157	-73.569	0.3092	-82.2953	0.3053	-87.531	0.3044	-88.7392	0.3043	-88.8735
			0.3709	0.3421	-38.664	0.3346	-48.7327	0.3263	-59.8755	0.3218	-65.9168	0.3156	-74.2403	0.309	-83.1008	0.3058	-87.3967	0.3033	-90.753	0.3042	-89.5447
			0.3711	0.3418	-39.3352	0.3347	-48.867	0.3265	-59.8755	0.3212	-66.9908	0.3155	-74.643	0.3094	-82.8322	0.3054	-88.2022	0.3028	-91.6927	0.304	-90.0817
			0.3712	0.342	-39.201	0.3352	-48.33	0.3266	-59.8755	0.3209	-67.5277	0.3155	-74.7772	0.309	-83.5035	0.3056	-88.068	0.3032	-91.29	0.3041	-90.0817
			0.3718	0.3416	-40.5435	0.3345	-50.0752	0.3261	-61.3523	0.3209	-68.3332	0.3155	-75.5828	0.3091	-84.1748	0.3056	-88.8735	0.3028	-92.6325	0.304	-91.0215
			0.3712	0.3422	-38.9325	0.3336	-50.478	0.3263	-60.2782	0.3209	-67.5277	0.3152	-75.18	0.3086	-84.0405	0.3049	-89.0077	0.3027	-91.9612	0.3037	-90.6187
			0.3708	0.3412	-39.738	0.3344	-48.867	0.3265	-59.4728	0.321	-66.8565	0.3149	-75.0458	0.3088	-83.235	0.3048	-88.605	0.3024	-91.827	0.3038	-89.9475
			0.3704	0.341	-39.4695	0.334	-48.867	0.326	-59.607	0.3205	-66.9908	0.3148	-74.643	0.3086	-82.9665	0.3046	-88.3365	0.3018	-92.0955	0.304	-89.142
			0.3712	0.3408	-40.812	0.3338	-50.2095	0.3258	-60.9495	0.3203	-68.3332	0.315	-75.4485	0.3084	-84.309	0.3043	-89.8132	0.3018	-93.1695	0.3032	-91.29
			0.3716	0.3414	-40.5435	0.3346	-49.6725	0.3258	-61.4865	0.321	-67.9305	0.3145	-76.6567	0.308	-85.383	0.3046	-89.9475	0.3021	-93.3038	0.3036	-91.29
			0.3721	0.3411	-41.6175	0.334	-51.1492	0.3259	-62.0235	0.321	-68.6017	0.3146	-77.1937	0.308	-86.0542	0.304	-91.4243	0.3021	-93.975	0.3032	-92.4982
			0.3719	0.3416	-40.6777	0.3338	-51.1493	0.3258	-61.8893	0.3204	-69.1387	0.3145	-77.0595	0.3077	-86.1885	0.3039	-91.29	0.3022	-93.5722	0.3032	-92.2297
			0.3719	0.341	-41.4832	0.334	-50.8807	0.3257	-62.0235	0.3197	-70.0785	0.3145	-77.0595	0.3079	-85.92	0.3043	-90.753	0.3016	-94.3778	0.3025	-93.1695
			0.372	0.3411	-41.4832	0.3339	-51.1493	0.3256	-62.292	0.3202	-69.5415	0.3143	-77.4622	0.3078	-86.1885	0.3043	-90.8872	0.3017	-94.3777	0.3035	-91.9613
			0.3706	0.3406	-40.275	0.3331	-50.3437	0.3252	-60.9495	0.3198	-68.199	0.3141	-75.8512	0.3078	-84.309	0.304	-89.4105	0.3017	-92.4982	0.303	-90.753
			0.3713	0.3409	-40.812	0.3329	-51.552	0.3252	-61.8893	0.3201	-68.736	0.3143	-76.5225	0.3076	-85.5173	0.304	-90.3503	0.301	-94.3778	0.303	-91.6928
			0.3707	0.3409	-40.0065	0.3332	-50.3437	0.3252	-61.0837	0.3202	-67.7962	0.3149	-74.9115	0.3072	-85.2488	0.3036	-90.0817	0.3012	-93.3037	0.3031	-90.753
			0.3709	0.3407	-40.5435	0.3329	-51.015	0.3246	-62.1578	0.3195	-69.0045	0.3138	-76.6567	0.3069	-85.92	0.3035	-90.4845	0.301	-93.8408	0.3026	-91.6928
			0.3708	0.3409	-40.1408	0.3331	-50.6123	0.3248	-61.755	0.3197	-68.6018	0.3137	-76.6568	0.3069	-85.7858	0.3036	-90.216	0.3014	-93.1695	0.3027	-91.4243
			0.3706	0.3421	-38.2612	0.3341	-49.0012	0.3251	-61.0837	0.3194	-68.736	0.3134	-76.791	0.3064	-86.1885	0.304	-89.4105	0.3007	-93.8407	0.302	-92.0955
			0.3713	0.3413	-40.275	0.333	-51.4177	0.3244	-62.9633	0.3194	-69.6757	0.313	-78.2678	0.3068	-86.5913	0.3031	-91.5585	0.301	-94.3778	0.3024	-92.4983
			0.3711	0.3405	-41.0805	0.3326	-51.6862	0.3245	-62.5605	0.319	-69.9442	0.3139	-76.791	0.3068	-86.3227	0.303	-91.4243	0.3009	-94.2435	0.3017	-93.1695
			0.3709	0.3412	-39.8723	0.3329	-51.015	0.3248	-61.8893	0.3191	-69.5415	0.3132	-77.4623	0.307	-85.7858	0.3036	-90.3503	0.3006	-94.3778	0.3019	-92.6325
			0.3709	0.3406	-40.6777	0.333	-50.8807	0.3245	-62.292	0.3187	-70.0785	0.3138	-76.6567	0.3065	-86.457	0.3026	-91.6928	0.3003	-94.7805	0.3017	-92.901
			0.3712	0.3409	-40.6777	0.3326	-51.8205	0.3248	-62.292	0.3191	-69.9442	0.3131	-77.9992	0.3065	-86.8597	0.3026	-92.0955	0.3012	-93.975	0.3016	-93.438
			0.3703	0.3419	-38.127	0.3327	-50.478	0.3248	-61.0838	0.3185	-69.5415	0.3131	-76.791	0.306	-86.3228	0.303	-90.3503	0.3004	-93.8408	0.301	-93.0353
			0.3715	0.3412	-40.6777	0.3329	-51.8205	0.3244	-63.2317	0.3187	-70.884	0.3129	-78.6705	0.3056	-88.4708	0.3025	-92.6325	0.3002	-95.7202	0.3015	-93.975
			0.37	0.3404	-39.738	0.3329	-49.8068	0.3237	-62.1578	0.3191	-68.3332	0.3126	-77.0595	0.3064	-85.383	0.3026	-90.4845	0.2999	-94.1092	0.3013	-92.2297
			0.3705	0.3404	-40.4093	0.3334	-49.8068	0.3249	-61.218	0.3184	-69.9442	0.3131	-77.0595	0.3062	-86.3227	0.302	-91.9613	0.2994	-95.4517	0.3015	-92.6325
			0.3706	0.3405	-40.4092	0.3331	-50.3437	0.3243	-62.1578	0.3185	-69.9442	0.3123	-78.2677	0.3055	-87.3967	0.3023	-91.6927	0.3	-94.7805	0.301	-93.438
			0.3706	0.3401	-40.9462	0.3321	-51.6862	0.3241	-62.4262	0.318	-70.6155	0.3127	-77.7308	0.3056	-87.2625	0.3021	-91.9613	0.2992	-95.8545	0.3009	-93.5722
			0.3708	0.3398	-41.6175	0.3319	-52.2233	0.3237	-63.2318	0.3181	-70.7498	0.3123	-78.5362	0.3051	-88.2023	0.3018	-92.6325	0.2994	-95.8545	0.3009	-93.8408
			0.3707	0.3405	-40.5435	0.3315	-52.626	0.3238	-62.9633	0.3181	-70.6155	0.3126	-77.9992	0.3057	-87.2625	0.3017	-92.6325	0.2989	-96.3915	0.3006	-94.1092
			0.371	0.3398	-41.886	0.3325	-51.6862	0.3244	-62.5605	0.3181	-71.0183	0.3121	-79.0733	0.3059	-87.3967	0.3015	-93.3038	0.2988	-96.9285	0.3006	-94.512
			0.3706	0.3394	-41.886	0.3323	-51.4177	0.3238	-62.829	0.318	-70.6155	0.3121	-78.5362	0.3049	-88.2022	0.3015	-92.7667	0.2992	-95.8545	0.3003	-94.3777
			0.3707	0.3401	-41.0805	0.3312	-53.0287	0.3233	-63.6345	0.3179	-70.884	0.3122	-78.5362	0.3048	-88.4707	0.3015	-92.901	0.2992	-95.9887	0.3001	-94.7805
			0.371	0.3409	-40.4093	0.3314	-53.163	0.3237	-63.5003	0.3175	-71.8237	0.3119	-79.3417	0.3056	-87.7995	0.3011	-93.8408	0.2985	-97.3313	0.2998	-95.586
			0.3715	0.3405	-41.6175	0.3323	-52.626	0.324	-63.7687	0.3177	-72.2265	0.3123	-79.476	0.305	-89.2763	0.3013	-94.2435	0.2991	-97.197	0.2997	-96.3915
			0.3707	0.3401	-41.0805	0.3321	-51.8205	0.3234	-63.5002	0.3179	-70.884	0.3121	-78.6705	0.305	-88.2022	0.3011	-93.438	0.2985	-96.9285	0.2998	-95.1832
			0.3697	0.3398	-40.1407	0.3318	-50.8807	0.3233	-62.292	0.3173	-70.347	0.3115	-78.1335	0.3045	-87.531	0.3009	-92.364	0.2986	-95.4517	0.2993	-94.512
			0.3707	0.3396	-41.7517	0.3315	-52.626	0.3229	-64.1715	0.3177	-71.1525	0.3121	-78.6705	0.3053	-87.7995	0.301	-93.5722	0.2983	-97.197	0.3	-94.9147
			0.3721	0.3395	-43.7655	0.3317	-54.237	0.3235	-65.2455	0.317	-73.9717	0.3116	-81.2212	0.3043	-91.0215	0.3012	-95.1832	0.2981	-99.345	0.3	-96.7942
			0.3708	0.339	-42.6915	0.331	-53.4315	0.3237	-63.2318	0.3171	-72.0923	0.311	-80.2815	0.3048	-88.605	0.3008	-93.975	0.298	-97.734	0.2995	-95.7203
			0.3705	0.3405	-40.275	0.3308	-53.2973	0.3231	-63.6345	0.3172	-71.5553	0.3111	-79.7445	0.3045	-88.605	0.301	-93.3038	0.2985	-96.66	0.2992	-95.7202
			0.3704	0.3401	-40.6777	0.331	-52.8945	0.3229	-63.7687	0.3168	-71.958	0.3107	-80.1473	0.3049	-87.9338	0.3002	-94.2435	0.2977	-97.5997	0.3	-94.512
			0.3709	0.3394	-42.2888	0.3318	-52.4918	0.3225	-64.977	0.3168	-72.6292	0.3118	-79.3417	0.3045	-89.142	0.3002	-94.9147	0.2981	-97.734	0.2991	-96.3915
			0.3712	0.3392	-42.96	0.3313	-53.5657	0.3233	-64.3058	0.3168	-73.032	0.3106	-81.3555	0.3043	-89.8132	0.3006	-94.7805	0.2973	-99.2107	0.2993	-96.5257
			0.3708	0.339	-42.6915	0.3308	-53.7	0.3229	-64.3058	0.3171	-72.0923	0.3106	-80.8185	0.304	-89.679	0.3002	-94.7805	0.2977	-98.1367	0.2988	-96.66
			0.3705	0.3387	-42.6915	0.3309	-53.163	0.3223	-64.7085	0.3164	-72.6292	0.3106	-80.4158	0.3041	-89.142	0.3002	-94.3777	0.2972	-98.4052	0.2987	-96.3915
			0.3705	0.3391	-42.1545	0.3302	-54.1028	0.3221	-64.977	0.3164	-72.6292	0.3105	-80.55	0.3039	-89.4105	0.2999	-94.7805	0.2977	-97.734	0.2987	-96.3915
			0.3707	0.3385	-43.2285	0.3308	-53.5657	0.3231	-63.903	0.3171	-71.958	0.3102	-81.2212	0.304	-89.5447	0.2999	-95.049	0.2967	-99.345	0.2982	-97.3312
			0.3704	0.3392	-41.886	0.3302	-53.9685	0.322	-64.977	0.3163	-72.6292	0.3109	-79.8787	0.304	-89.142	0.2994	-95.3175	0.297	-98.5395	0.2985	-96.5258
			0.3699	0.3388	-41.7518	0.3309	-52.3575	0.3221	-64.1715	0.316	-72.3608	0.3109	-79.2075	0.3033	-89.4105	0.2996	-94.3778	0.297	-97.8683	0.2984	-95.9888
			0.37	0.3387	-42.0202	0.3312	-52.089	0.3223	-64.0373	0.3165	-71.8237	0.3097	-80.9528	0.3033	-89.5447	0.2997	-94.3777	0.2971	-97.8683	0.2983	-96.2572
			0.3706	0.3389	-42.5573	0.3306	-53.7	0.322	-65.2455	0.316	-73.3005	0.3108	-80.2815	0.303	-90.753	0.2995	-95.4517	0.2963	-99.7477	0.2982	-97.197
			0.3702	0.3387	-42.2887	0.3304	-53.4315	0.3215	-65.3797	0.3161	-72.6292	0.3105	-80.1472	0.3037	-89.2762	0.2989	-95.7202	0.2967	-98.6737	0.2979	-97.0627
			0.3707	0.3384	-43.3627	0.3311	-53.163	0.3218	-65.6483	0.3157	-73.8375	0.3099	-81.624	0.3028	-91.1557	0.299	-96.2572	0.2965	-99.6135	0.2985	-96.9285
			0.3711	0.3384	-43.8998	0.3299	-55.311	0.3215	-66.588	0.3154	-74.7772	0.3092	-83.1008	0.303	-91.4243	0.2994	-96.2572	0.296	-100.822	0.2978	-98.4052
			0.3705	0.3386	-42.8257	0.3305	-53.7	0.3216	-65.6483	0.3153	-74.106	0.3098	-81.4897	0.3029	-90.753	0.2991	-95.8545	0.2963	-99.6135	0.2978	-97.5997
			0.3705	0.338	-43.6312	0.3299	-54.5055	0.3213	-66.051	0.3154	-73.9717	0.3098	-81.4897	0.3021	-91.827	0.2988	-96.2572	0.296	-100.016	0.2974	-98.1367
			0.3709	0.338	-44.1682	0.3299	-55.0425	0.3217	-66.051	0.3152	-74.7773	0.309	-83.1008	0.3024	-91.9613	0.2989	-96.66	0.2957	-100.956	0.2976	-98.4053
			0.3701	0.3384	-42.5573	0.3297	-54.237	0.3211	-65.7825	0.3159	-72.7635	0.3093	-81.624	0.302	-91.4243	0.2987	-95.8545	0.2961	-99.345	0.2973	-97.734
			0.3708	0.3383	-43.6313	0.3301	-54.6398	0.3214	-66.3195	0.3156	-74.106	0.3089	-83.1008	0.3026	-91.5585	0.2986	-96.9285	0.2956	-100.956	0.2975	-98.4053
			0.3711	0.3389	-43.2285	0.3296	-55.7137	0.3213	-66.8565	0.3154	-74.7772	0.3093	-82.9665	0.3023	-92.364	0.2985	-97.4655	0.2957	-101.224	0.2978	-98.4052
			0.3709	0.338	-44.1682	0.3294	-55.7137	0.3209	-67.125	0.3149	-75.18	0.3089	-83.235	0.302	-92.4983	0.298	-97.8683	0.2956	-101.09	0.2976	-98.4053
			0.3704	0.3374	-44.3025	0.3296	-54.774	0.3207	-66.7223	0.3147	-74.7773	0.3092	-82.161	0.3017	-92.2297	0.2984	-96.66	0.2959	-100.016	0.2974	-98.0025
			0.3705	0.3385	-42.96	0.3295	-55.0425	0.321	-66.4537	0.3147	-74.9115	0.3085	-83.235	0.3015	-92.6325	0.2982	-97.0627	0.2953	-100.956	0.2975	-98.0025
			0.3705	0.338	-43.6312	0.3286	-56.2507	0.3244	-61.8892	0.3151	-74.3745	0.3089	-82.698	0.3013	-92.901	0.2981	-97.197	0.2951	-101.225	0.2966	-99.2108
			0.3702	0.338	-43.2285	0.3292	-55.0425	0.3205	-66.7222	0.3142	-75.18	0.3088	-82.4295	0.3015	-92.2297	0.2978	-97.197	0.2951	-100.822	0.2965	-98.9422
			0.371	0.3384	-43.7655	0.3293	-55.9823	0.3211	-66.9908	0.3148	-75.4485	0.3082	-84.309	0.3016	-93.1695	0.2975	-98.6738	0.2957	-101.09	0.2964	-100.15
			0.3705	0.3381	-43.497	0.3294	-55.1767	0.3205	-67.125	0.3148	-74.7772	0.3086	-83.1008	0.3019	-92.0955	0.2973	-98.271	0.2948	-101.627	0.2967	-99.0765
			0.3708	0.3375	-44.7052	0.3284	-56.922	0.3203	-67.7963	0.3143	-75.8512	0.3083	-83.9062	0.3013	-93.3038	0.2975	-98.4053	0.2953	-101.359	0.2958	-100.688
			0.3715	0.3383	-44.571	0.3291	-56.922	0.3202	-68.8703	0.3148	-76.1197	0.3088	-84.1747	0.3014	-94.1092	0.2974	-99.4792	0.2956	-101.896	0.296	-101.359
			0.371	0.3374	-45.108	0.3291	-56.2507	0.3207	-67.5278	0.3139	-76.6567	0.3086	-83.772	0.3013	-93.5722	0.297	-99.345	0.2949	-102.164	0.2966	-99.882
			0.371	0.337	-45.645	0.3285	-57.0562	0.3201	-68.3332	0.3137	-76.9253	0.3074	-85.383	0.3014	-93.438	0.2973	-98.9422	0.2946	-102.567	0.2958	-100.956
			0.37	0.3376	-43.497	0.3289	-55.1767	0.3202	-66.8565	0.3144	-74.643	0.3079	-83.3692	0.3006	-93.1695	0.2973	-97.5997	0.2949	-100.822	0.2956	-99.882
			0.3707	0.3378	-44.1682	0.3291	-55.848	0.3205	-67.3935	0.3136	-76.6567	0.3078	-84.4432	0.3005	-94.2435	0.2973	-98.5395	0.294	-102.97	0.2967	-99.345
			0.3707	0.3373	-44.8395	0.3282	-57.0562	0.3193	-69.0045	0.3147	-75.18	0.3075	-84.846	0.3011	-93.438	0.2967	-99.345	0.2941	-102.835	0.2959	-100.419
			0.3702	0.3378	-43.497	0.3281	-56.5192	0.32	-67.3935	0.3136	-75.9855	0.3073	-84.4432	0.3003	-93.8407	0.2969	-98.4052	0.2943	-101.896	0.2954	-100.419
			0.3712	0.3373	-45.5107	0.3282	-57.7275	0.3199	-68.8702	0.3134	-77.5965	0.3075	-85.5172	0.3002	-95.3175	0.2968	-99.882	0.2943	-103.238	0.2956	-101.493
			0.3702	0.3372	-44.3025	0.3288	-55.5795	0.3197	-67.7962	0.3141	-75.3142	0.3077	-83.9062	0.3006	-93.438	0.2965	-98.9422	0.2941	-102.164	0.295	-100.956
			0.3706	0.3371	-44.9737	0.3282	-56.922	0.3194	-68.736	0.3138	-76.254	0.3081	-83.9062	0.3007	-93.8407	0.2968	-99.0765	0.2938	-103.104	0.2955	-100.822

## Sheet: Coupling Enzyme Parameters
	DEAMINATION REACTION
	Co-Substrate for Methyl Transfer (Select ONE)					SAM	8-aza-SAM		pH of EXPERIMENT	7.6
						YES	NO
	De Parameters for DEAMINATION RECTIONS					De MAX (ACIDIC)	De MAX (BASIC)	pKa
						(M-1 cm-1)	(M-1 cm-1)	deaminated product
	with SAM (recorded at 263 nm)					-8076	-4655	8.72
	with 8-aza-SAM		recorded at (Select ONE)	282 nm	NO	-14975	-2026	7.29			SENSITIVE FOR MOST pHs (<8.00)
				292 nm	NO	-10117	-3016	7.3			SENSITIVE FOR HIGH pHs (>8.00)
	De for SPECIFIC EXPERIMENTAL CONDITIONS is:					-7834.79	(M-1 cm-1)	-7834.79
	INSTRUCTIONS:
	The PINK cells MUST NOT be edited; data in these cells correspond to universal parameters established within the article.
	ONLY GREEN and BLUE cells should be filed: user MUST input a 'YES' or 'NO' answer within GREEN cells.
	Likewise, user MUST input the experimental pH value she/he used within BLUE cell.

## Sheet: My 1-Step EZ-MTase RESULTS
		MTase Experiments
		LEVEL 1:
		For each substrate concentration, input the value (mAbs/min)
		of the matching Initial Slope from the GRAPH onto the left.
			TbPRMT7 RATES		(CORRECTED for SAM DECOMPOSITION)
			[H4 1-20]	Init slope (10 mm; mAbs/min)	TIME FRAME	Speed (10 mm; Abs/min)	Rate with Peptide Acceptor (mM/h)	Corrected Rate (mM/h)
			mM
			0	0		0	0	0
			16.59	-1.2326	0-15 min	-0.0012326	9.43944	9.43944
			24.9956	-1.4149	0-15 min	-0.0014149	10.8355	10.8355
			35.392	-1.7563	0-15 min	-0.0017563	13.45	13.45
			49.9912	-1.9978	0-15 min	-0.0019978	15.2995	15.2995
			69.8992	-2.2268	0-15 min	-0.0022268	17.0532	17.0532
			99.9824	-2.5736	0-15 min	-0.0025736	19.709	19.709
			149.974	-2.8942	0-15 min	-0.0028942	22.1642	22.1642
			199.965	-2.9989	0-15 min	-0.0029989	22.966	22.966
			243.32	-3.2357	0-15 min	-0.0032357	24.7795	24.7795
							CONGRATS!
							YOUR KINETIC DATA
							with its FIT
							LEVEL 2:
							Enter guess values for kcat and Km in GREEN cells.
							Enter your MTase enzyme concentration (BLUE cell).
							Use SOLVER to fit your data (see picture on the RIGHT).
			FOR FIT ONLY
			[H4(1-20)] (mM)	Corrected MTase Rate (mM/h)	Predicted Rate (mM/h)	c 2		kcat (h-1)		27.6624	Best Fit Values
								Km (mM)		38.6143																												Curve Fit
			0	0	0	0		[MTase] (mM)		1.003																												[H4 1-20]		Predicted Rate (mM/h)
			16.59	9.43944	8.33805	1.21305																																(mM)
			24.9956	10.8355	10.9026	0.00449984		Sc2		2.92994
			35.392	13.45	13.2687	0.032882																																0			0
			49.9912	15.2995	15.654	0.125671																																0.97328			0.682134
			69.8992	17.0532	17.8723	0.670921																																1.94656			1.33153
			99.9824	19.709	20.0153	0.0938039																																2.91984			1.9505
			149.974	22.1642	22.0644	0.00996271																																3.89312			2.54111
			199.965	22.966	23.2548	0.0833835																																4.8664			3.10529
			243.32	24.7795	23.9454	0.695772																																5.83968			3.64477
																																						6.81296			4.16112
																																						7.78624			4.65582
																																						8.75952			5.13019
																																						9.7328			5.58545
																																						10.7061			6.02276
																																						11.6794			6.44313
																																						12.6526			6.84755
																																						13.6259			7.23689
																																						14.5992			7.61199
																																						15.5725			7.97362
																																						16.5458			8.32249
																																						17.519			8.65926
																																						18.4923			8.98455
																																						19.4656			9.29893
																																						20.4389			9.60296
																																						21.4122			9.89712
																																						22.3854			10.1819
																																						23.3587			10.4577
																																						24.332			10.725
																																						25.3053			10.9842
																																						26.2786			11.2356
																																						27.2518			11.4795
																																						28.2251			11.7164
																																						29.1984			11.9465
																																						30.1717			12.17
																																						31.145			12.3873
																																						32.1182			12.5986
																																						33.0915			12.8042
																																						34.0648			13.0043
																																						35.0381			13.1991
																																						36.0114			13.3888
																																						36.9846			13.5737
																																						37.9579			13.7538
																																						38.9312			13.9294
																																						39.9045			14.1007
																																						40.8778			14.2677
																																						41.851			14.4307
																																						42.8243			14.5899
																																						43.7976			14.7452
																																						44.7709			14.897
																																						45.7442			15.0452
																																						46.7174			15.1901
																																						47.6907			15.3317
																																						48.664			15.4701
																																						49.6373			15.6055
																																						50.6106			15.7379
																																						51.5838			15.8675
																																						52.5571			15.9943
																																						53.5304			16.1184
																																						54.5037			16.2399
																																						55.477			16.3589
																																						56.4502			16.4755
																																						57.4235			16.5897
																																						58.3968			16.7016
																																						59.3701			16.8113
																																						60.3434			16.9189
																																						61.3166			17.0243
																																						62.2899			17.1277
																																						63.2632			17.2292
																																						64.2365			17.3287
																																						65.2098			17.4263
																																						66.183			17.5222
																																						67.1563			17.6162
																																						68.1296			17.7086
																																						69.1029			17.7993
																																						70.0762			17.8883
																																						71.0494			17.9758
																																						72.0227			18.0618
																																						72.996			18.1462
																																						73.9693			18.2292
																																						74.9426			18.3108
																																						75.9158			18.3909
																																						76.8891			18.4698
																																						77.8624			18.5473
																																						78.8357			18.6235
																																						79.809			18.6985
																																						80.7822			18.7722
																																						81.7555			18.8448
																																						82.7288			18.9162
																																						83.7021			18.9864
																																						84.6754			19.0556
																																						85.6486			19.1236
																																						86.6219			19.1906
																																						87.5952			19.2566
																																						88.5685			19.3216
																																						89.5418			19.3855
																																						90.515			19.4485
																																						91.4883			19.5106
																																						92.4616			19.5718
																																						93.4349			19.632
																																						94.4082			19.6914
																																						95.3814			19.7499
																																						96.3547			19.8075
																																						97.328			19.8644
																																						98.3013			19.9204
																																						99.2746			19.9756
																																						100.248			20.0301
																																						101.221			20.0838
																																						102.194			20.1367
																																						103.168			20.189
																																						104.141			20.2405
																																						105.114			20.2913
																																						106.088			20.3414
																																						107.061			20.3909
																																						108.034			20.4397
																																						109.007			20.4879
																																						109.981			20.5354
																																						110.954			20.5823
																																						111.927			20.6286
																																						112.9			20.6744
																																						113.874			20.7195
																																						114.847			20.7641
																																						115.82			20.8081
																																						116.794			20.8515
																																						117.767			20.8944
																																						118.74			20.9368
																																						119.713			20.9786
																																						120.687			21.02
																																						121.66			21.0608
																																						122.633			21.1012
																																						123.607			21.141
																																						124.58			21.1804
																																						125.553			21.2193
																																						126.526			21.2578
																																						127.5			21.2958
																																						128.473			21.3334
																																						129.446			21.3705
																																						130.42			21.4072
																																						131.393			21.4435
																																						132.366			21.4794
																																						133.339			21.5148
																																						134.313			21.5499
																																						135.286			21.5846
																																						136.259			21.6189
																																						137.232			21.6528
																																						138.206			21.6863
																																						139.179			21.7195
																																						140.152			21.7523
																																						141.126			21.7848
																																						142.099			21.8169
																																						143.072			21.8486
																																						144.045			21.88
																																						145.019			21.9111
																																						145.992			21.9419
																																						146.965			21.9723
																																						147.939			22.0024
																																						148.912			22.0322
																																						149.885			22.0617
																																						150.858			22.0909
																																						151.832			22.1198
																																						152.805			22.1484
																																						153.778			22.1768
																																						154.752			22.2048
																																						155.725			22.2325
																																						156.698			22.26
																																						157.671			22.2872
																																						158.645			22.3141
																																						159.618			22.3408
																																						160.591			22.3672
																																						161.564			22.3934
																																						162.538			22.4193
																																						163.511			22.4449
																																						164.484			22.4703
																																						165.458			22.4955
																																						166.431			22.5204
																																						167.404			22.5451
																																						168.377			22.5695
																																						169.351			22.5937
																																						170.324			22.6177
																																						171.297			22.6415
																																						172.271			22.6651
																																						173.244			22.6884
																																						174.217			22.7115
																																						175.19			22.7344
																																						176.164			22.7572
																																						177.137			22.7797
																																						178.11			22.802
																																						179.084			22.8241
																																						180.057			22.846
																																						181.03			22.8677
																																						182.003			22.8892
																																						182.977			22.9105
																																						183.95			22.9317
																																						184.923			22.9526
																																						185.896			22.9734
																																						186.87			22.994
																																						187.843			23.0144
																																						188.816			23.0347
																																						189.79			23.0547
																																						190.763			23.0746
																																						191.736			23.0944
																																						192.709			23.1139
																																						193.683			23.1334
																																						194.656			23.1526
																																						195.629			23.1717
																																						196.603			23.1906
																																						197.576			23.2094
																																						198.549			23.228
																																						199.522			23.2465
																																						200.496			23.2648
																																						201.469			23.2829
																																						202.442			23.3009
																																						203.416			23.3188
																																						204.389			23.3365
																																						205.362			23.3541
																																						206.335			23.3716
																																						207.309			23.3889
																																						208.282			23.4061
																																						209.255			23.4231
																																						210.228			23.44
																																						211.202			23.4568
																																						212.175			23.4734
																																						213.148			23.4899
																																						214.122			23.5063
																																						215.095			23.5226
																																						216.068			23.5387
																																						217.041			23.5547
																																						218.015			23.5706
																																						218.988			23.5864
																																						219.961			23.6021
																																						220.935			23.6176
																																						221.908			23.633
																																						222.881			23.6483
																																						223.854			23.6635
																																						224.828			23.6786
																																						225.801			23.6936
																																						226.774			23.7084
																																						227.748			23.7232
																																						228.721			23.7378
																																						229.694			23.7524
																																						230.667			23.7668
																																						231.641			23.7811
																																						232.614			23.7954
																																						233.587			23.8095
																																						234.56			23.8235
																																						235.534			23.8374
																																						236.507			23.8512
																																						237.48			23.865
																																						238.454			23.8786
																																						239.427			23.8921
																																						240.4			23.9056
																																						241.373			23.9189
