# Supplementary material for: A simplified characterization of S-adenosyl-l-methionine-consuming enzymes with 1-Step EZ-MTase: a universal and straightforward coupled-assay for in vitro and in vivo setting
Source: Royal Society of Chemistry journal article supplement (doi:10.1039/c7sc02830j), 2017-01-01
Supplement: c7sc02830j3.xlsx [file c7sc02830j3.xlsx]

## Sheet: INSTRUCTIONS
	My 1-Step EZ-MTase ASSAY
	Establish your experimental conditions (e.g. buffer, pH, MTase and other additives' concentrations) using worksheet "Experiment Conditions".
	Once your kinetics are complete, insert your experimental data within worksheet "Plate Reader Data".
	Within worksheet "Coupling Enzyme Parameters", input the pH at which your experiments were performed.
	You will also need to identify the methyl donor you selected for your experiments (SAM, 8-aza-SAM).
	Finally, determine initial velocities using worksheet "My 1-Step EZ-MTase RESULTS".
	Using the least square difference fit and 'SOLVER', this worksheet will deliver the kinetic parameters for your favorite MTase.
	Data in this file are pertinent to the kinetic behavior of 8-aza-SAM with CePRMT5

## Sheet: Experiment Conditions
My 1-Step EZ-MTase Assay
Experimental set-up and data analysis made easy.
Determine: kinetic parameters for CoFactor (Km and kcat) of your favorite MethylTransferase.
	In a UV-star 96-well flat bottom plate (Greiner Bio One, #655801), add the following reagents in rows A and B.
	NOTE:	Row A is dedicated to Blank Samples (Methyl Acceptor is omitted).
		Data in Row A will account for Background Signal (natural decomposition of SAM/AdoMet).
		Reagents								#1	#2	#3	#4	#5	#6	#7	#8	#9	#10	#11	#12		Final in well	250	mL
Step 1		WATER								112.142	111.892	111.342	110.142	109.642	108.842	106.042	104.342	102.642	100.142	97.642	117.842
Step 2		BUFFER (stock at 200 mM; your favorite pH)								62.5	62.5	62.5	62.5	62.5	62.5	62.5	62.5	62.5	62.5	62.5	62.5		50	mM
Step 3		GLYCEROL (stock at 50%)								50	50	50	50	50	50	50	50	50	50	50	50		10	%
Step 4		bME (stock at 100 mM)								2.5	2.5	2.5	2.5	2.5	2.5	2.5	2.5	2.5	2.5	2.5	2.5		1	mM
Step 5		NaCl (optional)			Stock is at:		500		mM	0	0	0	0	0	0	0	0	0	0	0	0		0	mM
Step 6		Additive #2 (optional)			Stock is at:		20		mM	0	0	0	0	0	0	0	0	0	0	0	0		0	mM
MIX WELL! Step 7		TM0936 (final 4 mM)			Stock is at:		240.5		mM	4.158	4.158	4.158	4.158	4.158	4.158	4.158	4.158	4.158	4.158	4.158	4.158		4	mM
Step 8		Your favorite MTase (final X nM)				Stock is at:		29	mM	13	13	13	13	13	13	13	13	13	13	13	13		1508	nM
Step 9		SAM or 8-aza-SAM (various increasing concentrations)								0.5	0.75	1.3	2.5	3	3.8	6.6	8.3	10	12.5	15			various	mM
Add Methyl Acceptor MIX WELL & READ DIRECTLY!		Methyl Acceptor (constant concentration; for Meas in Row B)								5.2	5.2	5.2	5.2	5.2	5.2	5.2	5.2	5.2	5.2	5.2			104	mM
		Water (Blanks Row A)			Stock is at:		5		mM
		This step STARTS the MethylTranferase Reaction!
		Desired Final SAM or 8-aza-SAM concentration (in mM)								4.16	6.24	10.816	20.8	24.96	31.616	54.912	69.056	83.2	104	124.8	0
		Original SAM or 8-aza-SAM Stock Concentration:						2.08	mM
		NOTE:	Cells in GREEN are ACTIVE and MUST be filed by user.							Cells in GREY (CoFactor) are ACTIVE and MUST be filed by user.

## Sheet: Plate Reader Data
My 1-Step EZ-MTase Assay *** Data Input ***
For each well, your plate reader recorded absorbance values. Absorbance was measured every T second over an extanded period of time.
Step 1:	Please enter the interval T (in second) within the ORANGE cell.							Enter your SAM/8-aza-SAM experimental concentrations withing the BLUE cells.
				Step 2:		Copy/Paste, within GREEN cells, the plate reader values for BLANK experiments (Blk).
				Step 3:		Copy/Paste, within GREEN cells, the plate reader values for MTase experiments (Meas).
				NOTE:		RED cells are not to be modified.
interval T (s)		Time (min)	[CoFactor] (mM)	4.16				6.24				10.816				20.8				24.96				31.616				54.912				69.056				83.2				104				124.8
				Blk	Meas	494.845	493.503	Blk	Meas	534.315	538.88	Blk	Meas	602.917	602.514	Blk	Meas	742	745.49	Blk	Meas	798.653	800.398	Blk	Meas	911.289	907.127	Blk	Meas	1257.12	1239.53	Blk	Meas	1444.13	1419.16	Blk	Meas	1617.85	1660.94	Blk	Meas	1922.59	1926.08	Blk	Meas	2235.13	2229.76
4		0		0.3686	0.3676	0	0	0.398	0.4014	0	0	0.4491	0.4488	0	0	0.5527	0.5553	0	0	0.5949	0.5962	0	0	0.6788	0.6757	0	0	0.9364	0.9233	0	0	1.0757	1.0571	0	0	1.2051	1.2372	0	0	1.4321	1.4347	0	0	1.6649	1.6609	0	0
		0.0666667		0.372	0.37	4.5645	3.222	0.3942	0.4026	-5.1015	1.611	0.4468	0.4506	-3.08775	2.4165	0.5545	0.5575	2.4165	2.9535	0.5932	0.5937	-2.28225	-3.35625	0.6731	0.6761	-7.65225	0.537	0.9378	0.9216	1.8795	-2.28225	1.0727	1.0574	-4.0275	0.40275	1.2111	1.2355	8.055	-2.28225	1.4355	1.4332	4.5645	-2.01375	1.662	1.6651	-3.89325	5.6385
		0.133333		0.3686	0.3679	0	0.40275	0.3955	0.401	-3.35625	-0.537	0.4466	0.452	-3.35625	4.296	0.5537	0.5537	1.3425	-2.148	0.5946	0.5974	-0.40275	1.611	0.6756	0.6728	-4.296	-3.89325	0.9312	0.918	-6.981	-7.11525	1.0765	1.0575	1.074	0.537	1.2078	1.2399	3.62475	3.62475	1.4249	1.4318	-9.666	-3.89325	1.6665	1.6565	2.148	-5.907
Optical Factor correction to a LIGHT PATH of 10 mm using the PLATE #655801 and 250 mL per well.		0.2		0.3683	0.3665	-0.40275	-1.47675	0.3956	0.4038	-3.222	3.222	0.4507	0.4509	2.148	2.81925	0.5554	0.5553	3.62475	0	0.5965	0.5936	2.148	-3.4905	0.6708	0.6779	-10.74	2.9535	0.9342	0.9151	-2.9535	-11.0085	1.0734	1.0548	-3.08775	-3.08775	1.2124	1.2259	9.80025	-15.1702	1.4293	1.4319	-3.759	-3.759	1.6655	1.6563	0.8055	-6.1755
		0.266667		0.37	0.368	1.8795	0.537	0.3958	0.4056	-2.9535	5.6385	0.4463	0.4495	-3.759	0.93975	0.5525	0.5583	-0.2685	4.0275	0.5953	0.5936	0.537	-3.4905	0.677	0.682	-2.4165	8.45775	0.9338	0.921	-3.4905	-3.08775	1.0728	1.0603	-3.89325	4.296	1.2048	1.2303	-0.40275	-9.26325	1.4301	1.4345	-2.685	-0.2685	1.6548	1.6577	-13.5593	-4.296
		0.333333		0.37	0.3655	1.8795	-2.81925	0.3946	0.4029	-4.5645	2.01375	0.4466	0.4481	-3.35625	-0.93975	0.5524	0.5535	-0.40275	-2.4165	0.5944	0.5964	-0.67125	0.2685	0.6766	0.6777	-2.9535	2.685	0.9296	0.9176	-9.129	-7.65225	1.0709	1.0533	-6.444	-5.1015	1.2107	1.2351	7.518	-2.81925	1.4259	1.4291	-8.3235	-7.518	1.6712	1.6536	8.45775	-9.80025
		0.4		0.3705	0.3696	2.55075	2.685	0.3968	0.4033	-1.611	2.55075	0.4462	0.4493	-3.89325	0.67125	0.5553	0.5551	3.4905	-0.2685	0.5941	0.593	-1.074	-4.296	0.6743	0.678	-6.04125	3.08775	0.9341	0.9174	-3.08775	-7.92075	1.068	1.0574	-10.3373	0.40275	1.2053	1.2304	0.2685	-9.129	1.4269	1.4282	-6.981	-8.72625	1.6595	1.6529	-7.2495	-10.74
		0.466667		0.3684	0.3697	-0.2685	2.81925	0.3949	0.4034	-4.16175	2.685	0.4486	0.4499	-0.67125	1.47675	0.5535	0.555	1.074	-0.40275	0.5921	0.5949	-3.759	-1.74525	0.6737	0.6835	-6.84675	10.4715	0.9413	0.9151	6.57825	-11.0085	1.0748	1.0552	-1.20825	-2.55075	1.2075	1.229	3.222	-11.0085	1.436	1.4297	5.23575	-6.7125	1.6616	1.662	-4.43025	1.47675
		0.533333		0.3691	0.369	0.67125	1.8795	0.396	0.4008	-2.685	-0.8055	0.4458	0.4502	-4.43025	1.8795	0.5547	0.555	2.685	-0.40275	0.5951	0.5956	0.2685	-0.8055	0.6762	0.6793	-3.4905	4.833	0.9373	0.9194	1.20825	-5.23575	1.0724	1.0545	-4.43025	-3.4905	1.2099	1.2282	6.444	-12.0825	1.4299	1.4275	-2.9535	-9.666	1.6648	1.6632	-0.13425	3.08775
		0.6		0.3679	0.3682	-0.93975	0.8055	0.3947	0.4006	-4.43025	-1.074	0.4468	0.4478	-3.08775	-1.3425	0.5528	0.5564	0.13425	1.47675	0.5928	0.5954	-2.81925	-1.074	0.6728	0.6789	-8.055	4.296	0.9435	0.9238	9.53175	0.67125	1.0714	1.0526	-5.77275	-6.04125	1.2034	1.235	-2.28225	-2.9535	1.4315	1.4221	-0.8055	-16.9155	1.662	1.6643	-3.89325	4.5645
		0.666667		0.3703	0.369	2.28225	1.8795	0.3951	0.4032	-3.89325	2.4165	0.4485	0.4513	-0.8055	3.35625	0.5526	0.553	-0.13425	-3.08775	0.5931	0.5951	-2.4165	-1.47675	0.677	0.6795	-2.4165	5.1015	0.9446	0.9204	11.0085	-3.89325	1.073	1.0526	-3.62475	-6.04125	1.2048	1.2258	-0.40275	-15.3045	1.4301	1.4286	-2.685	-8.18925	1.6636	1.6501	-1.74525	-14.499
		0.733333		0.3703	0.3701	2.28225	3.35625	0.3954	0.4021	-3.4905	0.93975	0.4481	0.4487	-1.3425	-0.13425	0.5501	0.556	-3.4905	0.93975	0.5927	0.5977	-2.9535	2.01375	0.6734	0.6803	-7.2495	6.1755	0.9505	0.9159	18.9293	-9.9345	1.0701	1.0573	-7.518	0.2685	1.2057	1.229	0.8055	-11.0085	1.4295	1.4278	-3.4905	-9.26325	1.6623	1.6528	-3.4905	-10.8743
1.3425		0.8		0.3688	0.3685	0.2685	1.20825	0.396	0.4008	-2.685	-0.8055	0.4476	0.4496	-2.01375	1.074	0.5553	0.5549	3.4905	-0.537	0.5936	0.5949	-1.74525	-1.74525	0.6774	0.6846	-1.8795	11.9483	0.948	0.9159	15.573	-9.9345	1.0758	1.0574	0.13425	0.40275	1.2106	1.2256	7.38375	-15.573	1.4295	1.4253	-3.4905	-12.6195	1.665	1.6547	0.13425	-8.3235
		0.866667		0.3695	0.3696	1.20825	2.685	0.3965	0.4019	-2.01375	0.67125	0.4469	0.449	-2.9535	0.2685	0.5514	0.5548	-1.74525	-0.67125	0.5912	0.5959	-4.96725	-0.40275	0.6743	0.6855	-6.04125	13.1565	0.9547	0.9182	24.5678	-6.84675	1.0805	1.0576	6.444	0.67125	1.2096	1.2283	6.04125	-11.9483	1.431	1.4216	-1.47675	-17.5868	1.6551	1.6509	-13.1565	-13.425
		0.933333		0.3671	0.3671	-2.01375	-0.67125	0.3971	0.4012	-1.20825	-0.2685	0.449	0.4493	-0.13425	0.67125	0.5564	0.5552	4.96725	-0.13425	0.5953	0.5966	0.537	0.537	0.6725	0.6767	-8.45775	1.3425	0.9534	0.9179	22.8225	-7.2495	1.0711	1.0565	-6.1755	-0.8055	1.2065	1.226	1.8795	-15.036	1.4277	1.4274	-5.907	-9.80025	1.6599	1.6593	-6.7125	-2.148
		1		0.3693	0.366	0.93975	-2.148	0.3944	0.4021	-4.833	0.93975	0.4457	0.4497	-4.5645	1.20825	0.5575	0.555	6.444	-0.40275	0.5965	0.5944	2.148	-2.4165	0.6735	0.6791	-7.11525	4.5645	0.951	0.9133	19.6005	-13.425	1.0696	1.0567	-8.18925	-0.537	1.2086	1.2267	4.69875	-14.0963	1.427	1.424	-6.84675	-14.3648	1.6616	1.6551	-4.43025	-7.7865
		1.06667		0.3691	0.3685	0.67125	1.20825	0.3974	0.4019	-0.8055	0.67125	0.4464	0.4492	-3.62475	0.537	0.5533	0.5551	0.8055	-0.2685	0.5953	0.5926	0.537	-4.833	0.6752	0.6789	-4.833	4.296	0.949	0.9143	16.9155	-12.0825	1.0675	1.0522	-11.0085	-6.57825	1.208	1.229	3.89325	-11.0085	1.4302	1.4359	-2.55075	1.611	1.672	1.6556	9.53175	-7.11525
		1.13333		0.3698	0.3689	1.611	1.74525	0.395	0.4	-4.0275	-1.8795	0.4472	0.4512	-2.55075	3.222	0.5542	0.5555	2.01375	0.2685	0.5959	0.5919	1.3425	-5.77275	0.6751	0.6845	-4.96725	11.814	0.9471	0.912	14.3648	-15.1702	1.072	1.0558	-4.96725	-1.74525	1.2092	1.2292	5.50425	-10.74	1.4369	1.4196	6.444	-20.2718	1.6615	1.6626	-4.5645	2.28225
		1.2		0.3699	0.3672	1.74525	-0.537	0.3955	0.4025	-3.35625	1.47675	0.4486	0.4507	-0.67125	2.55075	0.5489	0.5543	-5.1015	-1.3425	0.5926	0.5943	-3.08775	-2.55075	0.6742	0.6824	-6.1755	8.99475	0.947	0.9159	14.2305	-9.9345	1.0704	1.0529	-7.11525	-5.6385	1.2108	1.2303	7.65225	-9.26325	1.4261	1.4279	-8.055	-9.129	1.6575	1.6503	-9.9345	-14.2305
		1.26667		0.3688	0.366	0.2685	-2.148	0.3957	0.4008	-3.08775	-0.8055	0.449	0.4517	-0.13425	3.89325	0.5522	0.5534	-0.67125	-2.55075	0.5949	0.5965	0	0.40275	0.684	0.6803	6.981	6.1755	0.9418	0.9141	7.2495	-12.351	1.0727	1.0577	-4.0275	0.8055	1.2144	1.2344	12.4852	-3.759	1.4315	1.4256	-0.8055	-12.2168	1.6603	1.6497	-6.1755	-15.036
		1.33333		0.3677	0.3658	-1.20825	-2.4165	0.3968	0.3987	-1.611	-3.62475	0.4493	0.4498	0.2685	1.3425	0.5512	0.5529	-2.01375	-3.222	0.5938	0.5905	-1.47675	-7.65225	0.6775	0.6801	-1.74525	5.907	0.9392	0.9171	3.759	-8.3235	1.0718	1.0558	-5.23575	-1.74525	1.2082	1.235	4.16175	-2.9535	1.438	1.4266	7.92075	-10.8743	1.6705	1.6584	7.518	-3.35625
		1.4		0.3675	0.3669	-1.47675	-0.93975	0.3952	0.401	-3.759	-0.537	0.4457	0.4519	-4.5645	4.16175	0.5497	0.555	-4.0275	-0.40275	0.5933	0.5921	-2.148	-5.50425	0.6736	0.6803	-6.981	6.1755	0.9388	0.9218	3.222	-2.01375	1.0671	1.0545	-11.5455	-3.4905	1.2082	1.2318	4.16175	-7.2495	1.4294	1.4271	-3.62475	-10.203	1.6609	1.6542	-5.37	-8.99475
		1.46667		0.369	0.3682	0.537	0.8055	0.3947	0.4006	-4.43025	-1.074	0.4482	0.4514	-1.20825	3.4905	0.5529	0.5579	0.2685	3.4905	0.5965	0.5964	2.148	0.2685	0.6773	0.6784	-2.01375	3.62475	0.9389	0.9171	3.35625	-8.3235	1.0708	1.0569	-6.57825	-0.2685	1.2052	1.2328	0.13425	-5.907	1.4301	1.4251	-2.685	-12.888	1.6554	1.6544	-12.7537	-8.72625
		1.53333		0.3688	0.367	0.2685	-0.8055	0.3958	0.4017	-2.9535	0.40275	0.4535	0.4494	5.907	0.8055	0.551	0.5549	-2.28225	-0.537	0.5942	0.5971	-0.93975	1.20825	0.6751	0.682	-4.96725	8.45775	0.9436	0.9249	9.666	2.148	1.0686	1.0561	-9.53175	-1.3425	1.2051	1.2291	0	-10.8742	1.4251	1.4209	-9.3975	-18.5265	1.6549	1.6501	-13.425	-14.499
		1.6		0.3714	0.3688	3.759	1.611	0.3961	0.4017	-2.55075	0.40275	0.4502	0.4498	1.47675	1.3425	0.5513	0.5538	-1.8795	-2.01375	0.5943	0.5952	-0.8055	-1.3425	0.6753	0.6785	-4.69875	3.759	0.933	0.917	-4.5645	-8.45775	1.0692	1.0552	-8.72625	-2.55075	1.2082	1.2314	4.16175	-7.7865	1.437	1.4363	6.57825	2.148	1.6546	1.6553	-13.8277	-7.518
		1.66667		0.368	0.3691	-0.8055	2.01375	0.3945	0.4004	-4.69875	-1.3425	0.4463	0.4515	-3.759	3.62475	0.5529	0.554	0.2685	-1.74525	0.5933	0.5934	-2.148	-3.759	0.6735	0.6785	-7.11525	3.759	0.927	0.9194	-12.6195	-5.23575	1.0667	1.0536	-12.0825	-4.69875	1.2095	1.2327	5.907	-6.04125	1.4306	1.4367	-2.01375	2.685	1.6566	1.6598	-11.1427	-1.47675
		1.73333		0.3677	0.3667	-1.20825	-1.20825	0.3953	0.4016	-3.62475	0.2685	0.446	0.4498	-4.16175	1.3425	0.552	0.5551	-0.93975	-0.2685	0.5962	0.5938	1.74525	-3.222	0.6738	0.6808	-6.7125	6.84675	0.9301	0.9162	-8.45775	-9.53175	1.0685	1.0546	-9.666	-3.35625	1.2048	1.2318	-0.40275	-7.2495	1.4284	1.4307	-4.96725	-5.37	1.6509	1.6674	-18.795	8.72625
		1.8		0.3685	0.3671	-0.13425	-0.67125	0.3972	0.4026	-1.074	1.611	0.4461	0.4508	-4.0275	2.685	0.5508	0.5558	-2.55075	0.67125	0.5939	0.5934	-1.3425	-3.759	0.6769	0.6771	-2.55075	1.8795	0.9252	0.9194	-15.036	-5.23575	1.0708	1.0541	-6.57825	-4.0275	1.2099	1.228	6.444	-12.351	1.4264	1.427	-7.65225	-10.3373	1.6594	1.6524	-7.38375	-11.4113
		1.86667		0.3701	0.3686	2.01375	1.3425	0.3974	0.4009	-0.8055	-0.67125	0.4491	0.4497	0	1.20825	0.5547	0.5539	2.685	-1.8795	0.594	0.5934	-1.20825	-3.759	0.6728	0.6822	-8.055	8.72625	0.9246	0.9194	-15.8415	-5.23575	1.0754	1.0514	-0.40275	-7.65225	1.2112	1.2276	8.18925	-12.888	1.4311	1.4299	-1.3425	-6.444	1.6635	1.6623	-1.8795	1.8795
		1.93333		0.3682	0.3681	-0.537	0.67125	0.3935	0.4007	-6.04125	-0.93975	0.4483	0.449	-1.074	0.2685	0.5523	0.5549	-0.537	-0.537	0.5939	0.5968	-1.3425	0.8055	0.672	0.6773	-9.129	2.148	0.9224	0.9162	-18.795	-9.53175	1.0718	1.0556	-5.23575	-2.01375	1.2122	1.2283	9.53175	-11.9483	1.431	1.4301	-1.47675	-6.1755	1.6689	1.6538	5.37	-9.53175
		2		0.3693	0.3693	0.93975	2.28225	0.3946	0.4005	-4.5645	-1.20825	0.4459	0.4514	-4.296	3.4905	0.5522	0.5544	-0.67125	-1.20825	0.5944	0.5925	-0.67125	-4.96725	0.6759	0.6812	-3.89325	7.38375	0.9307	0.9155	-7.65225	-10.4715	1.0729	1.0541	-3.759	-4.0275	1.2112	1.233	8.18925	-5.6385	1.4311	1.4303	-1.3425	-5.907	1.6589	1.6516	-8.055	-12.4853
		2.06667		0.3686	0.3669	0	-0.93975	0.3937	0.3999	-5.77275	-2.01375	0.4481	0.4496	-1.3425	1.074	0.5567	0.5546	5.37	-0.93975	0.595	0.595	0.13425	-1.611	0.6732	0.6801	-7.518	5.907	0.9253	0.9169	-14.9017	-8.592	1.0736	1.0558	-2.81925	-1.74525	1.2086	1.2253	4.69875	-15.9758	1.4353	1.4305	4.296	-5.6385	1.6614	1.6591	-4.69875	-2.4165
		2.13333		0.3677	0.3656	-1.20825	-2.685	0.3947	0.4015	-4.43025	0.13425	0.4495	0.4508	0.537	2.685	0.5529	0.5546	0.2685	-0.93975	0.5931	0.5941	-2.4165	-2.81925	0.6737	0.6769	-6.84675	1.611	0.9276	0.9125	-11.814	-14.499	1.0724	1.0579	-4.43025	1.074	1.2062	1.2248	1.47675	-16.647	1.4322	1.4341	0.13425	-0.8055	1.6571	1.6626	-10.4715	2.28225
		2.2		0.3686	0.3708	0	4.296	0.3973	0.4033	-0.93975	2.55075	0.4469	0.451	-2.9535	2.9535	0.5504	0.5565	-3.08775	1.611	0.595	0.5922	0.13425	-5.37	0.6771	0.6791	-2.28225	4.5645	0.929	0.9144	-9.9345	-11.9482	1.0697	1.0523	-8.055	-6.444	1.2067	1.2253	2.148	-15.9758	1.4298	1.4266	-3.08775	-10.8743	1.6615	1.6562	-4.5645	-6.30975
		2.26667		0.3683	0.3684	-0.40275	1.074	0.3951	0.4025	-3.89325	1.47675	0.4477	0.4494	-1.8795	0.8055	0.5515	0.5532	-1.611	-2.81925	0.593	0.5957	-2.55075	-0.67125	0.6745	0.6745	-5.77275	-1.611	0.9306	0.9206	-7.7865	-3.62475	1.0736	1.0565	-2.81925	-0.8055	1.2086	1.2256	4.69875	-15.573	1.4315	1.4227	-0.8055	-16.11	1.6535	1.6512	-15.3045	-13.0222
		2.33333		0.3686	0.3687	0	1.47675	0.3962	0.4014	-2.4165	0	0.448	0.4504	-1.47675	2.148	0.5544	0.5571	2.28225	2.4165	0.5954	0.5942	0.67125	-2.685	0.6765	0.6805	-3.08775	6.444	0.9317	0.9148	-6.30975	-11.4113	1.0698	1.0537	-7.92075	-4.5645	1.2061	1.2313	1.3425	-7.92075	1.4309	1.4329	-1.611	-2.4165	1.6631	1.6518	-2.4165	-12.2168
		2.4		0.3685	0.3696	-0.13425	2.685	0.3955	0.4018	-3.35625	0.537	0.4467	0.4527	-3.222	5.23575	0.554	0.5583	1.74525	4.0275	0.5954	0.5922	0.67125	-5.37	0.6757	0.6789	-4.16175	4.296	0.934	0.9177	-3.222	-7.518	1.0712	1.0523	-6.04125	-6.444	1.208	1.2249	3.89325	-16.5127	1.4331	1.4221	1.3425	-16.9155	1.6673	1.6529	3.222	-10.74
		2.46667		0.3669	0.3678	-2.28225	0.2685	0.3964	0.4036	-2.148	2.9535	0.4472	0.4517	-2.55075	3.89325	0.555	0.554	3.08775	-1.74525	0.5967	0.5943	2.4165	-2.55075	0.6747	0.6745	-5.50425	-1.611	0.9251	0.9201	-15.1702	-4.296	1.0703	1.0538	-7.2495	-4.43025	1.2042	1.2274	-1.20825	-13.1565	1.4347	1.4257	3.4905	-12.0825	1.66	1.6591	-6.57825	-2.4165
		2.53333		0.3689	0.3683	0.40275	0.93975	0.3957	0.4044	-3.08775	4.0275	0.4475	0.4506	-2.148	2.4165	0.5556	0.5555	3.89325	0.2685	0.5957	0.5914	1.074	-6.444	0.6731	0.6781	-7.65225	3.222	0.9274	0.9146	-12.0825	-11.6798	1.0665	1.0525	-12.351	-6.1755	1.2025	1.2222	-3.4905	-20.1375	1.4305	1.4264	-2.148	-11.1428	1.6546	1.6546	-13.8277	-8.45775
		2.6		0.3685	0.367	-0.13425	-0.8055	0.3972	0.4055	-1.074	5.50425	0.4485	0.4523	-0.8055	4.69875	0.552	0.5545	-0.93975	-1.074	0.5897	0.5907	-6.981	-7.38375	0.6739	0.6854	-6.57825	13.0223	0.9308	0.9179	-7.518	-7.2495	1.0683	1.0524	-9.9345	-6.30975	1.2072	1.2247	2.81925	-16.7813	1.4286	1.4224	-4.69875	-16.5128	1.6573	1.6525	-10.203	-11.277
		2.66667		0.3692	0.3677	0.8055	0.13425	0.3938	0.4041	-5.6385	3.62475	0.4485	0.4523	-0.8055	4.69875	0.5502	0.5552	-3.35625	-0.13425	0.5924	0.593	-3.35625	-4.296	0.6749	0.6852	-5.23575	12.7538	0.9277	0.9175	-11.6798	-7.7865	1.0739	1.055	-2.4165	-2.81925	1.2105	1.2283	7.2495	-11.9483	1.4275	1.4279	-6.1755	-9.129	1.6591	1.6569	-7.7865	-5.37
		2.73333		0.3671	0.367	-2.01375	-0.8055	0.3964	0.4019	-2.148	0.67125	0.4485	0.4486	-0.8055	-0.2685	0.5529	0.5554	0.2685	0.13425	0.5923	0.5901	-3.4905	-8.18925	0.6765	0.6766	-3.08775	1.20825	0.921	0.9194	-20.6745	-5.23575	1.0763	1.0607	0.8055	4.833	1.2084	1.2288	4.43025	-11.277	1.43	1.4294	-2.81925	-7.11525	1.6587	1.6487	-8.3235	-16.3785
		2.8		0.367	0.368	-2.148	0.537	0.3971	0.4035	-1.20825	2.81925	0.4448	0.4499	-5.77275	1.47675	0.5498	0.5565	-3.89325	1.611	0.5916	0.5904	-4.43025	-7.7865	0.6764	0.6759	-3.222	0.2685	0.9283	0.9159	-10.8742	-9.9345	1.0711	1.0597	-6.1755	3.4905	1.2133	1.2214	11.0085	-21.2115	1.4241	1.4326	-10.74	-2.81925	1.6676	1.6564	3.62475	-6.04125
		2.86667		0.3686	0.3672	0	-0.537	0.3946	0.401	-4.5645	-0.537	0.4455	0.4503	-4.833	2.01375	0.5534	0.5557	0.93975	0.537	0.5964	0.5905	2.01375	-7.65225	0.6733	0.6756	-7.38375	-0.13425	0.9315	0.912	-6.57825	-15.1702	1.0741	1.0521	-2.148	-6.7125	1.2123	1.2302	9.666	-9.3975	1.4262	1.4297	-7.92075	-6.7125	1.6637	1.6596	-1.611	-1.74525
		2.93333		0.3681	0.3672	-0.67125	-0.537	0.3967	0.4004	-1.74525	-1.3425	0.4468	0.4544	-3.08775	7.518	0.5531	0.5596	0.537	5.77275	0.5929	0.5932	-2.685	-4.0275	0.6731	0.6826	-7.65225	9.26325	0.9304	0.913	-8.055	-13.8277	1.0719	1.0554	-5.1015	-2.28225	1.208	1.2342	3.89325	-4.0275	1.43	1.4209	-2.81925	-18.5265	1.6579	1.65	-9.3975	-14.6333
		3		0.3677	0.3664	-1.20825	-1.611	0.3948	0.4023	-4.296	1.20825	0.4483	0.4488	-1.074	0	0.552	0.559	-0.93975	4.96725	0.5931	0.5918	-2.4165	-5.907	0.6786	0.6766	-0.2685	1.20825	0.932	0.9162	-5.907	-9.53175	1.0715	1.0497	-5.6385	-9.9345	1.2076	1.2258	3.35625	-15.3045	1.4234	1.4188	-11.6797	-21.3458	1.6633	1.6431	-2.148	-23.8965
		3.06667		0.3679	0.3665	-0.93975	-1.47675	0.3938	0.4026	-5.6385	1.611	0.4466	0.4494	-3.35625	0.8055	0.5525	0.5534	-0.2685	-2.55075	0.5949	0.593	0	-4.296	0.6746	0.6823	-5.6385	8.8605	0.926	0.9193	-13.962	-5.37	1.0743	1.051	-1.8795	-8.18925	1.2145	1.2264	12.6195	-14.499	1.4257	1.431	-8.592	-4.96725	1.6626	1.6583	-3.08775	-3.4905
		3.13333		0.3691	0.3633	0.67125	-5.77275	0.3952	0.4014	-3.759	0	0.4449	0.4494	-5.6385	0.8055	0.5521	0.5542	-0.8055	-1.47675	0.5932	0.5925	-2.28225	-4.96725	0.6716	0.6831	-9.666	9.9345	0.9257	0.9181	-14.3647	-6.981	1.0704	1.0491	-7.11525	-10.74	1.2076	1.2269	3.35625	-13.8277	1.4288	1.4285	-4.43025	-8.3235	1.6564	1.6494	-11.4113	-15.4388
		3.2		0.3683	0.3659	-0.40275	-2.28225	0.3969	0.4025	-1.47675	1.47675	0.4463	0.4499	-3.759	1.47675	0.5519	0.5541	-1.074	-1.611	0.5968	0.5946	2.55075	-2.148	0.6751	0.6846	-4.96725	11.9483	0.9266	0.9134	-13.1565	-13.2908	1.0684	1.0543	-9.80025	-3.759	1.2129	1.2264	10.4715	-14.499	1.4262	1.4347	-7.92075	0	1.6606	1.6555	-5.77275	-7.2495
		3.26667		0.3672	0.3708	-1.8795	4.296	0.3961	0.4016	-2.55075	0.2685	0.4471	0.4524	-2.685	4.833	0.5513	0.555	-1.8795	-0.40275	0.5943	0.5922	-0.8055	-5.37	0.6766	0.679	-2.9535	4.43025	0.925	0.9128	-15.3045	-14.0963	1.0677	1.0544	-10.74	-3.62475	1.2095	1.224	5.907	-17.721	1.427	1.4253	-6.84675	-12.6195	1.6564	1.6561	-11.4113	-6.444
		3.33333		0.3675	0.3657	-1.47675	-2.55075	0.3953	0.4029	-3.62475	2.01375	0.4465	0.4484	-3.4905	-0.537	0.5535	0.5571	1.074	2.4165	0.5911	0.5923	-5.1015	-5.23575	0.6722	0.6733	-8.8605	-3.222	0.9236	0.9169	-17.184	-8.592	1.0678	1.0595	-10.6057	3.222	1.2127	1.2267	10.203	-14.0963	1.4283	1.4337	-5.1015	-1.3425	1.6568	1.6545	-10.8743	-8.592
		3.4		0.37	0.3659	1.8795	-2.28225	0.3945	0.4047	-4.69875	4.43025	0.4438	0.4495	-7.11525	0.93975	0.5516	0.5541	-1.47675	-1.611	0.5924	0.5953	-3.35625	-1.20825	0.6714	0.6767	-9.9345	1.3425	0.9231	0.9112	-17.8552	-16.2442	1.0747	1.0518	-1.3425	-7.11525	1.2117	1.2251	8.8605	-16.2442	1.4279	1.4329	-5.6385	-2.4165	1.6627	1.665	-2.9535	5.50425
		3.46667		0.3695	0.3677	1.20825	0.13425	0.3972	0.4015	-1.074	0.13425	0.4467	0.4495	-3.222	0.93975	0.5527	0.5547	0	-0.8055	0.5935	0.5911	-1.8795	-6.84675	0.6747	0.6824	-5.50425	8.99475	0.9292	0.9142	-9.666	-12.2168	1.068	1.0552	-10.3373	-2.55075	1.2094	1.2276	5.77275	-12.888	1.4305	1.4375	-2.148	3.759	1.6582	1.6489	-8.99475	-16.11
		3.53333		0.3689	0.367	0.40275	-0.8055	0.3962	0.3989	-2.4165	-3.35625	0.4476	0.4499	-2.01375	1.47675	0.5509	0.5514	-2.4165	-5.23575	0.5912	0.5929	-4.96725	-4.43025	0.6761	0.6794	-3.62475	4.96725	0.9213	0.9126	-20.2718	-14.3647	1.0707	1.05	-6.7125	-9.53175	1.2105	1.222	7.2495	-20.406	1.4269	1.421	-6.981	-18.3923	1.6544	1.6453	-14.0963	-20.943
		3.6		0.369	0.3685	0.537	1.20825	0.3979	0.4017	-0.13425	0.40275	0.4503	0.4485	1.611	-0.40275	0.5539	0.5529	1.611	-3.222	0.593	0.5935	-2.55075	-3.62475	0.6725	0.679	-8.45775	4.43025	0.9238	0.9122	-16.9155	-14.9017	1.0717	1.0552	-5.37	-2.55075	1.2107	1.2256	7.518	-15.573	1.4225	1.4293	-12.888	-7.2495	1.6653	1.6565	0.537	-5.907
		3.66667		0.3676	0.368	-1.3425	0.537	0.3945	0.404	-4.69875	3.4905	0.4466	0.4521	-3.35625	4.43025	0.5544	0.5524	2.28225	-3.89325	0.5939	0.5885	-1.3425	-10.3372	0.6739	0.6748	-6.57825	-1.20825	0.9272	0.9155	-12.351	-10.4715	1.0675	1.0543	-11.0085	-3.759	1.2094	1.2255	5.77275	-15.7072	1.4296	1.4298	-3.35625	-6.57825	1.6725	1.6514	10.203	-12.7538
		3.73333		0.3679	0.3644	-0.93975	-4.296	0.3962	0.4023	-2.4165	1.20825	0.4461	0.4525	-4.0275	4.96725	0.5536	0.5534	1.20825	-2.55075	0.5966	0.592	2.28225	-5.6385	0.6793	0.6769	0.67125	1.611	0.9232	0.9155	-17.721	-10.4715	1.0714	1.0521	-5.77275	-6.7125	1.2116	1.2215	8.72625	-21.0773	1.4301	1.4235	-2.685	-15.036	1.6554	1.6591	-12.7537	-2.4165
		3.8		0.3671	0.3662	-2.01375	-1.8795	0.3977	0.4028	-0.40275	1.8795	0.4463	0.4504	-3.759	2.148	0.5534	0.5519	0.93975	-4.5645	0.5962	0.5934	1.74525	-3.759	0.6792	0.675	0.537	-0.93975	0.9236	0.9137	-17.184	-12.888	1.0684	1.0507	-9.80025	-8.592	1.2077	1.228	3.4905	-12.351	1.426	1.4257	-8.18925	-12.0825	1.6646	1.6593	-0.40275	-2.148
		3.86667		0.3678	0.3685	-1.074	1.20825	0.3944	0.4004	-4.833	-1.3425	0.4459	0.4494	-4.296	0.8055	0.5515	0.5529	-1.611	-3.222	0.5893	0.5955	-7.518	-0.93975	0.6712	0.6794	-10.203	4.96725	0.9251	0.9101	-15.1702	-17.721	1.0707	1.0501	-6.7125	-9.3975	1.2069	1.2211	2.4165	-21.6142	1.4331	1.4195	1.3425	-20.406	1.6538	1.6576	-14.9018	-4.43025
		3.93333		0.3674	0.3654	-1.611	-2.9535	0.3967	0.4007	-1.74525	-0.93975	0.4528	0.4478	4.96725	-1.3425	0.5516	0.5556	-1.47675	0.40275	0.5926	0.5904	-3.08775	-7.7865	0.6735	0.6791	-7.11525	4.5645	0.924	0.9129	-16.647	-13.962	1.0694	1.0489	-8.45775	-11.0085	1.213	1.2239	10.6057	-17.8552	1.4212	1.4251	-14.6332	-12.888	1.6639	1.66	-1.3425	-1.20825
		4		0.3657	0.3649	-3.89325	-3.62475	0.396	0.4019	-2.685	0.67125	0.4602	0.4495	14.9017	0.93975	0.5536	0.5516	1.20825	-4.96725	0.5935	0.5928	-1.8795	-4.5645	0.6697	0.6743	-12.2168	-1.8795	0.9269	0.9149	-12.7537	-11.277	1.0735	1.0532	-2.9535	-5.23575	1.2058	1.2238	0.93975	-17.9895	1.4303	1.4319	-2.4165	-3.759	1.6618	1.6577	-4.16175	-4.296
		4.06667		0.3693	0.3668	0.93975	-1.074	0.3959	0.4032	-2.81925	2.4165	0.4568	0.4506	10.3372	2.4165	0.5508	0.553	-2.55075	-3.08775	0.5938	0.5914	-1.47675	-6.444	0.6716	0.6776	-9.666	2.55075	0.9272	0.9164	-12.351	-9.26325	1.0771	1.0534	1.8795	-4.96725	1.2129	1.2288	10.4715	-11.277	1.4359	1.431	5.1015	-4.96725	1.6551	1.6521	-13.1565	-11.814
		4.13333		0.3677	0.3686	-1.20825	1.3425	0.395	0.4029	-4.0275	2.01375	0.4494	0.4467	0.40275	-2.81925	0.5519	0.5563	-1.074	1.3425	0.5934	0.592	-2.01375	-5.6385	0.6747	0.6725	-5.50425	-4.296	0.9303	0.9162	-8.18925	-9.53175	1.0699	1.0527	-7.7865	-5.907	1.2045	1.2242	-0.8055	-17.4525	1.4347	1.4237	3.4905	-14.7675	1.651	1.6537	-18.6608	-9.666
		4.2		0.3687	0.366	0.13425	-2.148	0.3961	0.4	-2.55075	-1.8795	0.448	0.448	-1.47675	-1.074	0.5513	0.5522	-1.8795	-4.16175	0.5938	0.5933	-1.47675	-3.89325	0.6722	0.6751	-8.8605	-0.8055	0.9274	0.9138	-12.0825	-12.7538	1.0726	1.0483	-4.16175	-11.814	1.2121	1.2207	9.3975	-22.1513	1.4312	1.4267	-1.20825	-10.74	1.6582	1.6529	-8.99475	-10.74
		4.26667		0.3692	0.3645	0.8055	-4.16175	0.3961	0.4001	-2.55075	-1.74525	0.4479	0.448	-1.611	-1.074	0.5508	0.5537	-2.55075	-2.148	0.5939	0.594	-1.3425	-2.9535	0.6728	0.6773	-8.055	2.148	0.9246	0.915	-15.8415	-11.1427	1.0751	1.0533	-0.8055	-5.1015	1.2072	1.2264	2.81925	-14.499	1.4266	1.422	-7.38375	-17.0498	1.6535	1.6483	-15.3045	-16.9155
		4.33333		0.3683	0.3675	-0.40275	-0.13425	0.3994	0.4033	1.8795	2.55075	0.4494	0.4484	0.40275	-0.537	0.5495	0.5527	-4.296	-3.4905	0.5944	0.5924	-0.67125	-5.1015	0.6736	0.6753	-6.981	-0.537	0.9254	0.9163	-14.7675	-9.3975	1.0783	1.0492	3.4905	-10.6058	1.2066	1.2252	2.01375	-16.11	1.4252	1.4339	-9.26325	-1.074	1.6529	1.6422	-16.11	-25.1048
		4.4		0.3672	0.3679	-1.8795	0.40275	0.3952	0.4003	-3.759	-1.47675	0.4478	0.4484	-1.74525	-0.537	0.5488	0.5543	-5.23575	-1.3425	0.5938	0.5914	-1.47675	-6.444	0.6765	0.6744	-3.08775	-1.74525	0.9306	0.9123	-7.7865	-14.7675	1.0737	1.0528	-2.685	-5.77275	1.2025	1.225	-3.4905	-16.3785	1.4278	1.4256	-5.77275	-12.2168	1.6578	1.6618	-9.53175	1.20825
		4.46667		0.368	0.3681	-0.8055	0.67125	0.3944	0.3993	-4.833	-2.81925	0.4474	0.4498	-2.28225	1.3425	0.5528	0.5536	0.13425	-2.28225	0.5948	0.5904	-0.13425	-7.7865	0.6717	0.6786	-9.53175	3.89325	0.926	0.9129	-13.962	-13.962	1.0707	1.0515	-6.7125	-7.518	1.207	1.2268	2.55075	-13.962	1.433	1.4238	1.20825	-14.6333	1.6601	1.6533	-6.444	-10.203
		4.53333		0.369	0.3667	0.537	-1.20825	0.396	0.4013	-2.685	-0.13425	0.4478	0.4467	-1.74525	-2.81925	0.5507	0.5522	-2.685	-4.16175	0.5951	0.594	0.2685	-2.9535	0.6727	0.6769	-8.18925	1.611	0.9246	0.9156	-15.8415	-10.3373	1.0653	1.0543	-13.962	-3.759	1.2103	1.2257	6.981	-15.4388	1.4229	1.4224	-12.351	-16.5128	1.6627	1.6513	-2.9535	-12.888
		4.6		0.3693	0.3672	0.93975	-0.537	0.3982	0.3998	0.2685	-2.148	0.4461	0.4467	-4.0275	-2.81925	0.5527	0.5529	0	-3.222	0.5959	0.5939	1.3425	-3.08775	0.6758	0.6777	-4.0275	2.685	0.9224	0.9152	-18.795	-10.8742	1.0677	1.0561	-10.74	-1.3425	1.2071	1.2243	2.685	-17.3183	1.4257	1.4223	-8.592	-16.647	1.654	1.6496	-14.6333	-15.1703
		4.66667		0.3701	0.3676	2.01375	0	0.3969	0.4012	-1.47675	-0.2685	0.4479	0.4507	-1.611	2.55075	0.5525	0.5542	-0.2685	-1.47675	0.5949	0.5913	0	-6.57825	0.6777	0.677	-1.47675	1.74525	0.9242	0.9141	-16.3785	-12.351	1.0668	1.052	-11.9483	-6.84675	1.2084	1.2197	4.43025	-23.4937	1.4254	1.429	-8.99475	-7.65225	1.6627	1.6481	-2.9535	-17.184
		4.73333		0.3691	0.3657	0.67125	-2.55075	0.3947	0.4009	-4.43025	-0.67125	0.4453	0.4478	-5.1015	-1.3425	0.5529	0.5562	0.2685	1.20825	0.5934	0.5901	-2.01375	-8.18925	0.6733	0.6814	-7.38375	7.65225	0.9232	0.9159	-17.721	-9.9345	1.0706	1.0519	-6.84675	-6.981	1.2047	1.2232	-0.537	-18.795	1.4286	1.4223	-4.69875	-16.647	1.6683	1.6533	4.5645	-10.203
		4.8		0.3663	0.3664	-3.08775	-1.611	0.3955	0.4009	-3.35625	-0.67125	0.4442	0.4492	-6.57825	0.537	0.5528	0.5516	0.13425	-4.96725	0.5934	0.5924	-2.01375	-5.1015	0.6727	0.6761	-8.18925	0.537	0.9235	0.915	-17.3183	-11.1427	1.0694	1.051	-8.45775	-8.18925	1.2155	1.2239	13.962	-17.8552	1.4243	1.4266	-10.4715	-10.8743	1.6612	1.6548	-4.96725	-8.18925
		4.86667		0.369	0.3653	0.537	-3.08775	0.3971	0.4003	-1.20825	-1.47675	0.4458	0.4487	-4.43025	-0.13425	0.5535	0.554	1.074	-1.74525	0.5944	0.5899	-0.67125	-8.45775	0.6718	0.6722	-9.3975	-4.69875	0.9251	0.9125	-15.1702	-14.499	1.0664	1.0506	-12.4852	-8.72625	1.2113	1.2213	8.3235	-21.3457	1.4273	1.4264	-6.444	-11.1428	1.6635	1.6592	-1.8795	-2.28225
		4.93333		0.3656	0.3667	-4.0275	-1.20825	0.3939	0.4002	-5.50425	-1.611	0.446	0.4483	-4.16175	-0.67125	0.5514	0.5546	-1.74525	-0.93975	0.5928	0.5882	-2.81925	-10.74	0.6736	0.6759	-6.981	0.2685	0.9265	0.9151	-13.2907	-11.0085	1.0688	1.052	-9.26325	-6.84675	1.205	1.2187	-0.13425	-24.8363	1.4246	1.4262	-10.0687	-11.4113	1.6587	1.6519	-8.3235	-12.0825
		5		0.3677	0.368	-1.20825	0.537	0.3957	0.4013	-3.08775	-0.13425	0.446	0.451	-4.16175	2.9535	0.5495	0.5537	-4.296	-2.148	0.5923	0.5912	-3.4905	-6.7125	0.6694	0.6741	-12.6195	-2.148	0.9259	0.9096	-14.0963	-18.3923	1.0701	1.0522	-7.518	-6.57825	1.2098	1.2204	6.30975	-22.554	1.43	1.4234	-2.81925	-15.1703	1.6522	1.6476	-17.0498	-17.8553
		5.06667		0.3677	0.3675	-1.20825	-0.13425	0.3943	0.4039	-4.96725	3.35625	0.4462	0.4502	-3.89325	1.8795	0.5497	0.5504	-4.0275	-6.57825	0.5942	0.5896	-0.93975	-8.8605	0.6736	0.6739	-6.981	-2.4165	0.9239	0.9107	-16.7812	-16.9155	1.0683	1.055	-9.9345	-2.81925	1.2072	1.2202	2.81925	-22.8225	1.4247	1.4328	-9.9345	-2.55075	1.6581	1.6574	-9.129	-4.69875
		5.13333		0.367	0.3655	-2.148	-2.81925	0.3968	0.3999	-1.611	-2.01375	0.4514	0.4495	3.08775	0.93975	0.5509	0.5563	-2.4165	1.3425	0.5921	0.5904	-3.759	-7.7865	0.6745	0.6757	-5.77275	0	0.9279	0.9092	-11.4112	-18.9292	1.0681	1.0515	-10.203	-7.518	1.2069	1.2215	2.4165	-21.0773	1.4307	1.4283	-1.8795	-8.592	1.6672	1.6541	3.08775	-9.129
		5.2		0.3674	0.3643	-1.611	-4.43025	0.395	0.4	-4.0275	-1.8795	0.4644	0.4488	20.5402	0	0.5493	0.5534	-4.5645	-2.55075	0.5975	0.5926	3.4905	-4.833	0.6733	0.6725	-7.38375	-4.296	0.9269	0.9173	-12.7537	-8.055	1.0673	1.0488	-11.277	-11.1427	1.2051	1.2244	0	-17.184	1.4254	1.4282	-8.99475	-8.72625	1.6567	1.6461	-11.0085	-19.869
		5.26667		0.3668	0.3677	-2.4165	0.13425	0.3962	0.4033	-2.4165	2.55075	0.4738	0.4473	33.1597	-2.01375	0.5493	0.554	-4.5645	-1.74525	0.5943	0.5892	-0.8055	-9.3975	0.6744	0.6753	-5.907	-0.537	0.9266	0.9145	-13.1565	-11.814	1.0676	1.053	-10.8742	-5.50425	1.2033	1.2249	-2.4165	-16.5127	1.4234	1.4258	-11.6797	-11.9483	1.6508	1.6495	-18.9293	-15.3045
		5.33333		0.368	0.3662	-0.8055	-1.8795	0.3959	0.4016	-2.81925	0.2685	0.4486	0.4493	-0.67125	0.67125	0.5495	0.5536	-4.296	-2.28225	0.5927	0.5891	-2.9535	-9.53175	0.6759	0.6786	-3.89325	3.89325	0.9188	0.9152	-23.628	-10.8742	1.0715	1.0471	-5.6385	-13.425	1.2111	1.2283	8.055	-11.9483	1.4297	1.4311	-3.222	-4.833	1.659	1.6491	-7.92075	-15.8415
		5.4		0.3654	0.3643	-4.296	-4.43025	0.3959	0.4035	-2.81925	2.81925	0.4457	0.4462	-4.5645	-3.4905	0.5517	0.5529	-1.3425	-3.222	0.5929	0.591	-2.685	-6.981	0.6775	0.6832	-1.74525	10.0688	0.9243	0.9156	-16.2442	-10.3373	1.0688	1.0495	-9.26325	-10.203	1.211	1.2229	7.92075	-19.1977	1.4306	1.4288	-2.01375	-7.92075	1.6636	1.6534	-1.74525	-10.0688
		5.46667		0.3682	0.3645	-0.537	-4.16175	0.3953	0.4013	-3.62475	-0.13425	0.4458	0.4497	-4.43025	1.20825	0.5514	0.5545	-1.74525	-1.074	0.5948	0.5873	-0.13425	-11.9482	0.6729	0.6837	-7.92075	10.74	0.9253	0.9141	-14.9017	-12.351	1.0663	1.0518	-12.6195	-7.11525	1.2073	1.2233	2.9535	-18.6608	1.4345	1.4201	3.222	-19.6005	1.6633	1.651	-2.148	-13.2908
		5.53333		0.3688	0.3663	0.2685	-1.74525	0.399	0.4005	1.3425	-1.20825	0.4459	0.4477	-4.296	-1.47675	0.5557	0.5534	4.0275	-2.55075	0.5948	0.5882	-0.13425	-10.74	0.6723	0.6749	-8.72625	-1.074	0.9219	0.9106	-19.4662	-17.0498	1.0715	1.0562	-5.6385	-1.20825	1.2069	1.2229	2.4165	-19.1977	1.4237	1.4199	-11.277	-19.869	1.6542	1.6471	-14.3648	-18.5265
		5.6		0.3676	0.3666	-1.3425	-1.3425	0.3975	0.3985	-0.67125	-3.89325	0.4443	0.4479	-6.444	-1.20825	0.5529	0.5518	0.2685	-4.69875	0.5908	0.591	-5.50425	-6.981	0.6726	0.6728	-8.3235	-3.89325	0.9257	0.9128	-14.3647	-14.0963	1.0666	1.0501	-12.2168	-9.3975	1.2104	1.2227	7.11525	-19.4663	1.4215	1.4215	-14.2305	-17.721	1.66	1.6445	-6.57825	-22.017
		5.66667		0.3666	0.3673	-2.685	-0.40275	0.3936	0.3995	-5.907	-2.55075	0.4488	0.4491	-0.40275	0.40275	0.5523	0.5491	-0.537	-8.3235	0.5932	0.5893	-2.28225	-9.26325	0.6716	0.6789	-9.666	4.296	0.9365	0.9112	0.13425	-16.2442	1.0683	1.0528	-9.9345	-5.77275	1.2066	1.2271	2.01375	-13.5592	1.4274	1.4261	-6.30975	-11.5455	1.6606	1.6465	-5.77275	-19.332
		5.73333		0.3657	0.3669	-3.89325	-0.93975	0.3941	0.3993	-5.23575	-2.81925	0.453	0.4459	5.23575	-3.89325	0.5529	0.5545	0.2685	-1.074	0.5926	0.5877	-3.08775	-11.4112	0.673	0.676	-7.7865	0.40275	0.9461	0.9101	13.0222	-17.721	1.0706	1.0492	-6.84675	-10.6058	1.2074	1.2261	3.08775	-14.9018	1.4269	1.435	-6.981	0.40275	1.6524	1.6618	-16.7812	1.20825
		5.8		0.3686	0.369	0	1.8795	0.3946	0.3996	-4.5645	-2.4165	0.4519	0.4484	3.759	-0.537	0.5513	0.5528	-1.8795	-3.35625	0.5962	0.5893	1.74525	-9.26325	0.6738	0.6768	-6.7125	1.47675	0.935	0.9125	-1.8795	-14.499	1.0691	1.0514	-8.8605	-7.65225	1.2138	1.2273	11.6797	-13.2908	1.4214	1.4229	-14.3647	-15.8415	1.6545	1.6471	-13.962	-18.5265
		5.86667		0.371	0.3671	3.222	-0.67125	0.395	0.3994	-4.0275	-2.685	0.4495	0.4462	0.537	-3.4905	0.5524	0.5518	-0.40275	-4.69875	0.595	0.5887	0.13425	-10.0687	0.6753	0.6769	-4.69875	1.611	0.9256	0.9147	-14.499	-11.5455	1.0646	1.0515	-14.9017	-7.518	1.2098	1.2226	6.30975	-19.6005	1.4334	1.4208	1.74525	-18.6608	1.6584	1.6474	-8.72625	-18.1238
		5.93333		0.3669	0.3682	-2.28225	0.8055	0.392	0.4007	-8.055	-0.93975	0.4495	0.4488	0.537	0	0.5527	0.5489	0	-8.592	0.596	0.588	1.47675	-11.0085	0.6737	0.6719	-6.84675	-5.1015	0.9257	0.9088	-14.3647	-19.4662	1.0703	1.0504	-7.2495	-8.99475	1.2151	1.2213	13.425	-21.3457	1.4189	1.4244	-17.721	-13.8278	1.6605	1.6475	-5.907	-17.9895
		6		0.3692	0.3647	0.8055	-3.89325	0.395	0.4001	-4.0275	-1.74525	0.466	0.4472	22.6882	-2.148	0.5532	0.5519	0.67125	-4.5645	0.5917	0.5861	-4.296	-13.5593	0.6704	0.6777	-11.277	2.685	0.9252	0.9179	-15.036	-7.2495	1.0757	1.05	0	-9.53175	1.2032	1.2291	-2.55075	-10.8742	1.4303	1.4255	-2.4165	-12.351	1.6587	1.6423	-8.3235	-24.9705
		6.06667		0.3675	0.3659	-1.47675	-2.28225	0.3934	0.3998	-6.1755	-2.148	0.4639	0.446	19.869	-3.759	0.549	0.5538	-4.96725	-2.01375	0.5927	0.5879	-2.9535	-11.1427	0.6734	0.6791	-7.2495	4.5645	0.9225	0.9136	-18.6608	-13.0222	1.0709	1.0528	-6.444	-5.77275	1.2108	1.2236	7.65225	-18.258	1.4224	1.4281	-13.0222	-8.8605	1.656	1.6473	-11.9483	-18.258
		6.13333		0.3663	0.3645	-3.08775	-4.16175	0.3941	0.4002	-5.23575	-1.611	0.448	0.4482	-1.47675	-0.8055	0.5528	0.5538	0.13425	-2.01375	0.596	0.588	1.47675	-11.0085	0.6725	0.6737	-8.45775	-2.685	0.9223	0.9108	-18.9292	-16.7812	1.0702	1.0462	-7.38375	-14.6332	1.2082	1.2177	4.16175	-26.1788	1.428	1.4185	-5.50425	-21.7485	1.6563	1.6452	-11.5455	-21.0773
		6.2		0.3678	0.3664	-1.074	-1.611	0.3947	0.4001	-4.43025	-1.74525	0.4451	0.4474	-5.37	-1.8795	0.5524	0.5525	-0.40275	-3.759	0.5903	0.5907	-6.1755	-7.38375	0.673	0.6747	-7.7865	-1.3425	0.9261	0.9071	-13.8277	-21.7485	1.0705	1.0517	-6.981	-7.2495	1.2069	1.2204	2.4165	-22.554	1.4243	1.4206	-10.4715	-18.9292	1.6572	1.6482	-10.3373	-17.0498
		6.26667		0.3667	0.3658	-2.55075	-2.4165	0.3938	0.4005	-5.6385	-1.20825	0.4462	0.4477	-3.89325	-1.47675	0.5523	0.5511	-0.537	-5.6385	0.593	0.592	-2.55075	-5.6385	0.6723	0.6749	-8.72625	-1.074	0.9244	0.9109	-16.11	-16.647	1.0717	1.0503	-5.37	-9.129	1.2092	1.2183	5.50425	-25.3733	1.4221	1.4223	-13.425	-16.647	1.6616	1.6478	-4.43025	-17.5868
		6.33333		0.3662	0.3667	-3.222	-1.20825	0.3976	0.3989	-0.537	-3.35625	0.4461	0.4475	-4.0275	-1.74525	0.5528	0.5504	0.13425	-6.57825	0.5929	0.5895	-2.685	-8.99475	0.6764	0.6791	-3.222	4.5645	0.9234	0.9105	-17.4525	-17.184	1.069	1.0471	-8.99475	-13.425	1.2023	1.217	-3.759	-27.1185	1.4204	1.417	-15.7072	-23.7623	1.6536	1.6464	-15.1703	-19.4662
		6.4		0.3679	0.3662	-0.93975	-1.8795	0.3948	0.4021	-4.296	0.93975	0.4459	0.4494	-4.296	0.8055	0.5492	0.5508	-4.69875	-6.04125	0.595	0.5897	0.13425	-8.72625	0.6732	0.672	-7.518	-4.96725	0.9231	0.9121	-17.8552	-15.036	1.0695	1.0529	-8.3235	-5.6385	1.2066	1.2199	2.01375	-23.2252	1.4273	1.4231	-6.444	-15.573	1.6638	1.6444	-1.47675	-22.1513
		6.46667		0.3677	0.3664	-1.20825	-1.611	0.3949	0.399	-4.16175	-3.222	0.4452	0.4473	-5.23575	-2.01375	0.5518	0.5518	-1.20825	-4.69875	0.5924	0.5895	-3.35625	-8.99475	0.6712	0.6732	-10.203	-3.35625	0.9274	0.9098	-12.0825	-18.1237	1.0684	1.0506	-9.80025	-8.72625	1.2092	1.2249	5.50425	-16.5127	1.4234	1.4215	-11.6797	-17.721	1.6538	1.6487	-14.9018	-16.3785
		6.53333		0.3685	0.3655	-0.13425	-2.81925	0.3959	0.4005	-2.81925	-1.20825	0.4453	0.4482	-5.1015	-0.8055	0.5514	0.5531	-1.74525	-2.9535	0.5921	0.5897	-3.759	-8.72625	0.6721	0.6793	-8.99475	4.833	0.9228	0.9088	-18.258	-19.4662	1.0683	1.0497	-9.9345	-9.9345	1.2077	1.2191	3.4905	-24.2992	1.4206	1.4246	-15.4387	-13.5593	1.6644	1.6606	-0.67125	-0.40275
		6.6		0.3691	0.3675	0.67125	-0.13425	0.3965	0.4009	-2.01375	-0.67125	0.4491	0.4487	0	-0.13425	0.5494	0.551	-4.43025	-5.77275	0.5928	0.5909	-2.81925	-7.11525	0.6734	0.6747	-7.2495	-1.3425	0.9207	0.9112	-21.0773	-16.2442	1.0716	1.0475	-5.50425	-12.888	1.2059	1.2196	1.074	-23.628	1.4232	1.429	-11.9482	-7.65225	1.6723	1.6482	9.9345	-17.0498
		6.66667		0.3691	0.3639	0.67125	-4.96725	0.3951	0.4014	-3.89325	0	0.4596	0.4498	14.0962	1.3425	0.5561	0.5491	4.5645	-8.3235	0.5919	0.5879	-4.0275	-11.1427	0.6761	0.6766	-3.62475	1.20825	0.9369	0.9099	0.67125	-17.9895	1.0696	1.0496	-8.18925	-10.0687	1.2142	1.2216	12.2168	-20.943	1.4284	1.4201	-4.96725	-19.6005	1.6479	1.6476	-22.8225	-17.8553
		6.73333		0.3674	0.3674	-1.611	-0.2685	0.3947	0.3998	-4.43025	-2.148	0.4489	0.4487	-0.2685	-0.13425	0.5501	0.5515	-3.4905	-5.1015	0.5955	0.5887	0.8055	-10.0687	0.6766	0.6738	-2.9535	-2.55075	0.9287	0.9117	-10.3373	-15.573	1.0679	1.0475	-10.4715	-12.888	1.2052	1.2174	0.13425	-26.5815	1.4265	1.4284	-7.518	-8.45775	1.6525	1.6536	-16.647	-9.80025
		6.8		0.3673	0.3655	-1.74525	-2.81925	0.3946	0.4006	-4.5645	-1.074	0.4463	0.4473	-3.759	-2.01375	0.5503	0.5518	-3.222	-4.69875	0.5923	0.5893	-3.4905	-9.26325	0.672	0.6743	-9.129	-1.8795	0.9239	0.9068	-16.7812	-22.1512	1.0657	1.0451	-13.425	-16.11	1.2096	1.2173	6.04125	-26.7158	1.4269	1.4287	-6.981	-8.055	1.6511	1.6524	-18.5265	-11.4113
		6.86667		0.367	0.3673	-2.148	-0.40275	0.3958	0.3995	-2.9535	-2.55075	0.4453	0.4455	-5.1015	-4.43025	0.55	0.5525	-3.62475	-3.759	0.5948	0.5901	-0.13425	-8.18925	0.6754	0.6729	-4.5645	-3.759	0.9235	0.909	-17.3183	-19.1978	1.0665	1.0499	-12.351	-9.666	1.2109	1.2193	7.7865	-24.0308	1.4286	1.427	-4.69875	-10.3373	1.6563	1.6503	-11.5455	-14.2305
		6.93333		0.3668	0.3674	-2.4165	-0.2685	0.3948	0.4005	-4.296	-1.20825	0.4435	0.4467	-7.518	-2.81925	0.5552	0.5502	3.35625	-6.84675	0.5914	0.5916	-4.69875	-6.1755	0.6735	0.675	-7.11525	-0.93975	0.9239	0.9093	-16.7812	-18.795	1.0683	1.0471	-9.9345	-13.425	1.2106	1.2146	7.38375	-30.3405	1.4318	1.4266	-0.40275	-10.8743	1.6541	1.6436	-14.499	-23.2253
		7		0.3671	0.3671	-2.01375	-0.67125	0.3948	0.3986	-4.296	-3.759	0.4447	0.4478	-5.907	-1.3425	0.5508	0.55	-2.55075	-7.11525	0.5942	0.5908	-0.93975	-7.2495	0.6747	0.6734	-5.50425	-3.08775	0.9292	0.9082	-9.666	-20.2717	1.0664	1.0519	-12.4852	-6.981	1.2127	1.216	10.203	-28.461	1.4298	1.4211	-3.08775	-18.258	1.6548	1.6472	-13.5593	-18.3923
		7.06667		0.3675	0.3657	-1.47675	-2.55075	0.3956	0.3992	-3.222	-2.9535	0.4474	0.4471	-2.28225	-2.28225	0.5529	0.5497	0.2685	-7.518	0.5934	0.5894	-2.01375	-9.129	0.6768	0.6828	-2.685	9.53175	0.9206	0.9063	-21.2115	-22.8225	1.0704	1.0489	-7.11525	-11.0085	1.2089	1.2158	5.1015	-28.7295	1.4206	1.4283	-15.4387	-8.592	1.6635	1.6544	-1.8795	-8.72625
		7.13333		0.3677	0.3662	-1.20825	-1.8795	0.3948	0.3991	-4.296	-3.08775	0.4514	0.447	3.08775	-2.4165	0.551	0.5494	-2.28225	-7.92075	0.597	0.5919	2.81925	-5.77275	0.6756	0.6746	-4.296	-1.47675	0.9218	0.9135	-19.6005	-13.1565	1.0693	1.0456	-8.592	-15.4387	1.2058	1.2215	0.93975	-21.0773	1.4261	1.4254	-8.055	-12.4852	1.6526	1.6565	-16.5127	-5.907
		7.2		0.3681	0.3655	-0.67125	-2.81925	0.3946	0.4002	-4.5645	-1.611	0.4452	0.4496	-5.23575	1.074	0.551	0.5489	-2.28225	-8.592	0.5937	0.5899	-1.611	-8.45775	0.6731	0.6718	-7.65225	-5.23575	0.921	0.9122	-20.6745	-14.9017	1.0677	1.0495	-10.74	-10.203	1.2125	1.2175	9.9345	-26.4472	1.4267	1.4261	-7.2495	-11.5455	1.6539	1.6476	-14.7675	-17.8553
		7.26667		0.3681	0.3663	-0.67125	-1.74525	0.3951	0.3996	-3.89325	-2.4165	0.4498	0.447	0.93975	-2.4165	0.5499	0.5494	-3.759	-7.92075	0.5927	0.5902	-2.9535	-8.055	0.6745	0.6746	-5.77275	-1.47675	0.923	0.9115	-17.9895	-15.8415	1.0728	1.0484	-3.89325	-11.6797	1.2088	1.2211	4.96725	-21.6142	1.4254	1.4193	-8.99475	-20.6745	1.6506	1.6511	-19.1977	-13.1565
		7.33333		0.3683	0.3656	-0.40275	-2.685	0.3976	0.3982	-0.537	-4.296	0.4658	0.4455	22.4197	-4.43025	0.5512	0.5476	-2.01375	-10.3373	0.5915	0.5923	-4.5645	-5.23575	0.6723	0.6756	-8.72625	-0.13425	0.9368	0.9084	0.537	-20.0032	1.0677	1.0529	-10.74	-5.6385	1.2034	1.2135	-2.28225	-31.8173	1.4218	1.4177	-13.8277	-22.8225	1.6543	1.6531	-14.2305	-10.4715
		7.4		0.3668	0.3669	-2.4165	-0.93975	0.3969	0.4003	-1.47675	-1.47675	0.4452	0.4477	-5.23575	-1.47675	0.5498	0.5496	-3.89325	-7.65225	0.5938	0.59	-1.47675	-8.3235	0.6727	0.6799	-8.18925	5.6385	0.9271	0.9132	-12.4852	-13.5593	1.0692	1.0487	-8.72625	-11.277	1.2113	1.2206	8.3235	-22.2855	1.4261	1.4187	-8.055	-21.48	1.6476	1.6481	-23.2253	-17.184
		7.46667		0.3673	0.3653	-1.74525	-3.08775	0.3945	0.399	-4.69875	-3.222	0.4444	0.4477	-6.30975	-1.47675	0.5516	0.5504	-1.47675	-6.57825	0.5916	0.5911	-4.43025	-6.84675	0.674	0.6741	-6.444	-2.148	0.922	0.9066	-19.332	-22.4198	1.066	1.0487	-13.0222	-11.277	1.2078	1.2155	3.62475	-29.1322	1.4241	1.4216	-10.74	-17.5868	1.6499	1.6494	-20.1375	-15.4388
		7.53333		0.369	0.3651	0.537	-3.35625	0.3958	0.4007	-2.9535	-0.93975	0.4467	0.4466	-3.222	-2.9535	0.5504	0.553	-3.08775	-3.08775	0.5948	0.5898	-0.13425	-8.592	0.6721	0.6746	-8.99475	-1.47675	0.9214	0.9112	-20.1375	-16.2442	1.0705	1.0453	-6.981	-15.8415	1.2087	1.2212	4.833	-21.48	1.4282	1.4202	-5.23575	-19.4663	1.6584	1.647	-8.72625	-18.6608
		7.6		0.3697	0.3668	1.47675	-1.074	0.3937	0.4015	-5.77275	0.13425	0.4466	0.4454	-3.35625	-4.5645	0.5532	0.5466	0.67125	-11.6798	0.5921	0.5892	-3.759	-9.3975	0.672	0.67	-9.129	-7.65225	0.9202	0.9085	-21.7485	-19.869	1.0674	1.0498	-11.1428	-9.80025	1.2102	1.2152	6.84675	-29.535	1.4215	1.4236	-14.2305	-14.9018	1.6575	1.6584	-9.9345	-3.35625
		7.66667		0.3674	0.367	-1.611	-0.8055	0.3958	0.3995	-2.9535	-2.55075	0.4466	0.4468	-3.35625	-2.685	0.5513	0.5491	-1.8795	-8.3235	0.5912	0.5873	-4.96725	-11.9482	0.6716	0.6688	-9.666	-9.26325	0.9238	0.9121	-16.9155	-15.036	1.0672	1.0455	-11.4113	-15.573	1.2142	1.2175	12.2168	-26.4472	1.4283	1.42	-5.1015	-19.7348	1.6568	1.646	-10.8743	-20.0033
		7.73333		0.367	0.3636	-2.148	-5.37	0.3938	0.4001	-5.6385	-1.74525	0.4448	0.4457	-5.77275	-4.16175	0.5482	0.55	-6.04125	-7.11525	0.5957	0.5886	1.074	-10.203	0.6719	0.6784	-9.26325	3.62475	0.9186	0.9083	-23.8965	-20.1375	1.0679	1.0486	-10.4715	-11.4112	1.217	1.2194	15.9757	-23.8965	1.4229	1.4172	-12.351	-23.4938	1.6593	1.6463	-7.518	-19.6005
		7.8		0.3668	0.3654	-2.4165	-2.9535	0.3928	0.3996	-6.981	-2.4165	0.4448	0.4473	-5.77275	-2.01375	0.552	0.5522	-0.93975	-4.16175	0.597	0.5885	2.81925	-10.3372	0.6754	0.675	-4.5645	-0.93975	0.9199	0.9112	-22.1512	-16.2442	1.0687	1.0451	-9.3975	-16.11	1.2056	1.2196	0.67125	-23.628	1.4309	1.4237	-1.611	-14.7675	1.6491	1.6514	-21.2115	-12.7538
		7.86667		0.3669	0.3649	-2.28225	-3.62475	0.3968	0.4027	-1.611	1.74525	0.4441	0.4471	-6.7125	-2.28225	0.5503	0.5478	-3.222	-10.0688	0.5902	0.5903	-6.30975	-7.92075	0.6753	0.6742	-4.69875	-2.01375	0.9235	0.9103	-17.3183	-17.4525	1.07	1.0482	-7.65225	-11.9482	1.2122	1.2172	9.53175	-26.85	1.426	1.4283	-8.18925	-8.592	1.6642	1.6487	-0.93975	-16.3785
		7.93333		0.3666	0.3645	-2.685	-4.16175	0.3948	0.4	-4.296	-1.8795	0.4481	0.4519	-1.3425	4.16175	0.5517	0.5488	-1.3425	-8.72625	0.5908	0.5916	-5.50425	-6.1755	0.6754	0.6717	-4.5645	-5.37	0.9286	0.9143	-10.4715	-12.0825	1.0704	1.0436	-7.11525	-18.1237	1.206	1.2204	1.20825	-22.554	1.4322	1.4249	0.13425	-13.1565	1.6619	1.6551	-4.0275	-7.7865
		8		0.3673	0.3677	-1.74525	0.13425	0.393	0.4013	-6.7125	-0.13425	0.4664	0.4472	23.2252	-2.148	0.5521	0.5485	-0.8055	-9.129	0.5936	0.5854	-1.74525	-14.499	0.6773	0.6723	-2.01375	-4.5645	0.9306	0.9123	-7.7865	-14.7675	1.0683	1.0439	-9.9345	-17.721	1.2092	1.2161	5.50425	-28.3268	1.4256	1.4293	-8.72625	-7.2495	1.6533	1.6532	-15.573	-10.3373
		8.06667		0.3681	0.3676	-0.67125	0	0.3954	0.3994	-3.4905	-2.685	0.4473	0.4472	-2.4165	-2.148	0.5522	0.5521	-0.67125	-4.296	0.5929	0.5878	-2.685	-11.277	0.6705	0.67	-11.1427	-7.65225	0.9248	0.9108	-15.573	-16.7812	1.0682	1.0431	-10.0687	-18.795	1.2092	1.2215	5.50425	-21.0773	1.4232	1.4302	-11.9482	-6.04125	1.6611	1.6502	-5.1015	-14.3648
		8.13333		0.3663	0.3667	-3.08775	-1.20825	0.3967	0.3981	-1.74525	-4.43025	0.4459	0.4476	-4.296	-1.611	0.552	0.5502	-0.93975	-6.84675	0.5939	0.5897	-1.3425	-8.72625	0.6732	0.6721	-7.518	-4.833	0.9275	0.9086	-11.9482	-19.7348	1.0712	1.0482	-6.04125	-11.9482	1.2076	1.2212	3.35625	-21.48	1.43	1.4252	-2.81925	-12.7538	1.6569	1.6548	-10.74	-8.18925
		8.2		0.3685	0.3645	-0.13425	-4.16175	0.3985	0.4009	0.67125	-0.67125	0.4439	0.4463	-6.981	-3.35625	0.5502	0.5477	-3.35625	-10.203	0.5921	0.5876	-3.759	-11.5455	0.6743	0.6743	-6.04125	-1.8795	0.926	0.911	-13.962	-16.5128	1.0646	1.0486	-14.9017	-11.4112	1.2099	1.2179	6.444	-25.9102	1.4312	1.4192	-1.20825	-20.8088	1.6538	1.6463	-14.9018	-19.6005
		8.26667		0.3682	0.3651	-0.537	-3.35625	0.3949	0.4013	-4.16175	-0.13425	0.4449	0.4471	-5.6385	-2.28225	0.5482	0.5503	-6.04125	-6.7125	0.5917	0.5887	-4.296	-10.0687	0.6721	0.6737	-8.99475	-2.685	0.9213	0.9103	-20.2718	-17.4525	1.0705	1.0435	-6.981	-18.258	1.2046	1.2152	-0.67125	-29.535	1.4275	1.4192	-6.1755	-20.8088	1.6541	1.6498	-14.499	-14.9018
		8.33333		0.3668	0.3673	-2.4165	-0.40275	0.3939	0.3981	-5.50425	-4.43025	0.4431	0.4478	-8.055	-1.3425	0.5512	0.5502	-2.01375	-6.84675	0.5929	0.5901	-2.685	-8.18925	0.6725	0.6739	-8.45775	-2.4165	0.9207	0.9075	-21.0773	-21.2115	1.0676	1.0448	-10.8742	-16.5127	1.2086	1.216	4.69875	-28.461	1.4302	1.4172	-2.55075	-23.4938	1.6556	1.6445	-12.4853	-22.017
		8.4		0.3689	0.3675	0.40275	-0.13425	0.394	0.3991	-5.37	-3.08775	0.448	0.445	-1.47675	-5.1015	0.5524	0.5497	-0.40275	-7.518	0.5923	0.5931	-3.4905	-4.16175	0.6704	0.6759	-11.277	0.2685	0.9229	0.9083	-18.1237	-20.1375	1.0707	1.0488	-6.7125	-11.1427	1.2061	1.2166	1.3425	-27.6555	1.4242	1.418	-10.6058	-22.4198	1.648	1.6487	-22.6883	-16.3785
		8.46667		0.3657	0.3653	-3.89325	-3.08775	0.3934	0.4014	-6.1755	0	0.4452	0.4451	-5.23575	-4.96725	0.5539	0.5475	1.611	-10.4715	0.5911	0.5878	-5.1015	-11.277	0.6734	0.6798	-7.2495	5.50425	0.9194	0.9078	-22.8225	-20.8087	1.0679	1.0458	-10.4715	-15.1702	1.2046	1.2229	-0.67125	-19.1977	1.4229	1.421	-12.351	-18.3923	1.6544	1.6547	-14.0963	-8.3235
		8.53333		0.3683	0.3638	-0.40275	-5.1015	0.396	0.3997	-2.685	-2.28225	0.4436	0.4448	-7.38375	-5.37	0.5503	0.5487	-3.222	-8.8605	0.5928	0.5915	-2.81925	-6.30975	0.6696	0.6705	-12.351	-6.981	0.9233	0.9096	-17.5867	-18.3923	1.0716	1.0482	-5.50425	-11.9482	1.2101	1.2192	6.7125	-24.165	1.4203	1.4191	-15.8415	-20.943	1.6607	1.6469	-5.6385	-18.795
		8.6		0.3667	0.3661	-2.55075	-2.01375	0.3966	0.399	-1.8795	-3.222	0.4485	0.449	-0.8055	0.2685	0.5514	0.5504	-1.74525	-6.57825	0.5925	0.5884	-3.222	-10.4715	0.6747	0.6739	-5.50425	-2.4165	0.9451	0.9114	11.6798	-15.9758	1.0685	1.047	-9.666	-13.5592	1.2093	1.2144	5.6385	-30.609	1.4254	1.4231	-8.99475	-15.573	1.6581	1.6526	-9.129	-11.1427
		8.66667		0.3649	0.3661	-4.96725	-2.01375	0.3926	0.3986	-7.2495	-3.759	0.4455	0.4461	-4.833	-3.62475	0.5494	0.5468	-4.43025	-11.4113	0.5939	0.5895	-1.3425	-8.99475	0.6736	0.6722	-6.981	-4.69875	0.9269	0.9065	-12.7537	-22.554	1.0687	1.0482	-9.3975	-11.9482	1.2026	1.2177	-3.35625	-26.1788	1.4231	1.4235	-12.0825	-15.036	1.6575	1.6472	-9.9345	-18.3923
		8.73333		0.3674	0.3634	-1.611	-5.6385	0.3929	0.3971	-6.84675	-5.77275	0.4443	0.4482	-6.444	-0.8055	0.552	0.5547	-0.93975	-0.8055	0.5917	0.5864	-4.296	-13.1565	0.6742	0.6748	-6.1755	-1.20825	0.9234	0.9089	-17.4525	-19.332	1.0671	1.048	-11.5455	-12.2167	1.2099	1.2196	6.444	-23.628	1.4239	1.4216	-11.0085	-17.5868	1.6545	1.6546	-13.962	-8.45775
		8.8		0.3689	0.3632	0.40275	-5.907	0.3946	0.4011	-4.5645	-0.40275	0.4467	0.4468	-3.222	-2.685	0.5526	0.5506	-0.13425	-6.30975	0.5925	0.5879	-3.222	-11.1427	0.6744	0.6755	-5.907	-0.2685	0.9223	0.9108	-18.9292	-16.7812	1.0725	1.0455	-4.296	-15.573	1.2055	1.2249	0.537	-16.5127	1.4235	1.4293	-11.5455	-7.2495	1.6565	1.6479	-11.277	-17.4525
		8.86667		0.3674	0.3654	-1.611	-2.9535	0.3948	0.4009	-4.296	-0.67125	0.4479	0.4457	-1.611	-4.16175	0.5527	0.5511	0	-5.6385	0.5961	0.5886	1.611	-10.203	0.6719	0.6704	-9.26325	-7.11525	0.9232	0.9073	-17.721	-21.48	1.0664	1.0501	-12.4852	-9.3975	1.208	1.2134	3.89325	-31.9515	1.4246	1.4217	-10.0687	-17.4525	1.6488	1.6474	-21.6143	-18.1238
		8.93333		0.3665	0.3666	-2.81925	-1.3425	0.3963	0.3998	-2.28225	-2.148	0.4451	0.4453	-5.37	-4.69875	0.5534	0.551	0.93975	-5.77275	0.5949	0.5869	0	-12.4852	0.6708	0.6692	-10.74	-8.72625	0.9287	0.9107	-10.3373	-16.9155	1.0684	1.0459	-9.80025	-15.036	1.2004	1.2132	-6.30975	-32.22	1.4193	1.4231	-17.184	-15.573	1.6554	1.6543	-12.7537	-8.8605
		9		0.3693	0.3654	0.93975	-2.9535	0.3948	0.3986	-4.296	-3.759	0.4486	0.4462	-0.67125	-3.4905	0.5513	0.5493	-1.8795	-8.055	0.5945	0.5868	-0.537	-12.6195	0.6712	0.6756	-10.203	-0.13425	0.9292	0.9034	-9.666	-26.7158	1.0704	1.0471	-7.11525	-13.425	1.2072	1.215	2.81925	-29.8035	1.4218	1.4249	-13.8277	-13.1565	1.6625	1.6392	-3.222	-29.1323
		9.06667		0.3678	0.3656	-1.074	-2.685	0.3927	0.3979	-7.11525	-4.69875	0.4518	0.4457	3.62475	-4.16175	0.5512	0.5523	-2.01375	-4.0275	0.5904	0.5881	-6.04125	-10.8742	0.6714	0.673	-9.9345	-3.62475	0.9331	0.9085	-4.43025	-19.869	1.066	1.0442	-13.0222	-17.3182	1.2087	1.2147	4.833	-30.2063	1.4264	1.4213	-7.65225	-17.9895	1.6576	1.6524	-9.80025	-11.4113
		9.13333		0.3688	0.3649	0.2685	-3.62475	0.3955	0.3974	-3.35625	-5.37	0.4467	0.4448	-3.222	-5.37	0.5539	0.5505	1.611	-6.444	0.5901	0.5885	-6.444	-10.3372	0.6726	0.6723	-8.3235	-4.5645	0.9215	0.9039	-20.0032	-26.0445	1.0662	1.0448	-12.7537	-16.5127	1.215	1.2199	13.2907	-23.2252	1.4285	1.4149	-4.833	-26.5815	1.6606	1.6589	-5.77275	-2.685
		9.2		0.3682	0.3682	-0.537	0.8055	0.3945	0.4001	-4.69875	-1.74525	0.4443	0.4469	-6.444	-2.55075	0.5525	0.5503	-0.2685	-6.7125	0.5941	0.5906	-1.074	-7.518	0.6743	0.6714	-6.04125	-5.77275	0.9207	0.9055	-21.0773	-23.8965	1.0661	1.0457	-12.888	-15.3045	1.2081	1.2184	4.0275	-25.239	1.4272	1.4273	-6.57825	-9.9345	1.6575	1.647	-9.9345	-18.6608
		9.26667		0.3674	0.3636	-1.611	-5.37	0.393	0.3997	-6.7125	-2.28225	0.4478	0.4463	-1.74525	-3.35625	0.5544	0.5472	2.28225	-10.8742	0.592	0.5886	-3.89325	-10.203	0.6729	0.6725	-7.92075	-4.296	0.9258	0.9119	-14.2305	-15.3045	1.0677	1.0509	-10.74	-8.3235	1.2123	1.2142	9.666	-30.8775	1.4279	1.4231	-5.6385	-15.573	1.6576	1.6545	-9.80025	-8.592
		9.33333		0.368	0.367	-0.8055	-0.8055	0.395	0.3984	-4.0275	-4.0275	0.4446	0.4474	-6.04125	-1.8795	0.5489	0.548	-5.1015	-9.80025	0.5919	0.5855	-4.0275	-14.3647	0.6707	0.6737	-10.8743	-2.685	0.9285	0.9075	-10.6057	-21.2115	1.0653	1.0467	-13.962	-13.962	1.2091	1.2147	5.37	-30.2063	1.4315	1.4195	-0.8055	-20.406	1.658	1.6409	-9.26325	-26.85
		9.4		0.3674	0.3653	-1.611	-3.08775	0.3939	0.3984	-5.50425	-4.0275	0.4451	0.4473	-5.37	-2.01375	0.5491	0.5502	-4.833	-6.84675	0.5923	0.5914	-3.4905	-6.444	0.6687	0.6696	-13.5593	-8.18925	0.9257	0.903	-14.3647	-27.2528	1.0696	1.0487	-8.18925	-11.277	1.2071	1.2138	2.685	-31.4145	1.4218	1.4184	-13.8277	-21.8827	1.6549	1.6408	-13.425	-26.9843
		9.46667		0.3676	0.3636	-1.3425	-5.37	0.3965	0.3983	-2.01375	-4.16175	0.4457	0.4442	-4.5645	-6.1755	0.5511	0.5508	-2.148	-6.04125	0.5924	0.5903	-3.35625	-7.92075	0.6737	0.6721	-6.84675	-4.833	0.9172	0.9044	-25.776	-25.3733	1.0707	1.049	-6.7125	-10.8742	1.2064	1.219	1.74525	-24.4335	1.4265	1.4252	-7.518	-12.7538	1.6472	1.6455	-23.7623	-20.6745
		9.53333		0.3681	0.3652	-0.67125	-3.222	0.3973	0.398	-0.93975	-4.5645	0.4438	0.4447	-7.11525	-5.50425	0.5499	0.551	-3.759	-5.77275	0.5952	0.586	0.40275	-13.6935	0.6705	0.6751	-11.1427	-0.8055	0.9218	0.9093	-19.6005	-18.795	1.0709	1.0437	-6.444	-17.9895	1.2091	1.2149	5.37	-29.9377	1.4212	1.4249	-14.6332	-13.1565	1.6523	1.6496	-16.9155	-15.1703
		9.6		0.3669	0.3646	-2.28225	-4.0275	0.3946	0.3972	-4.5645	-5.6385	0.4451	0.4456	-5.37	-4.296	0.55	0.5493	-3.62475	-8.055	0.5907	0.586	-5.6385	-13.6935	0.6726	0.6686	-8.3235	-9.53175	0.9181	0.9068	-24.5677	-22.1512	1.0671	1.0465	-11.5455	-14.2305	1.2049	1.2142	-0.2685	-30.8775	1.4223	1.4284	-13.1565	-8.45775	1.65	1.6374	-20.0033	-31.5488
		9.66667		0.3663	0.363	-3.08775	-6.1755	0.3954	0.3975	-3.4905	-5.23575	0.445	0.4475	-5.50425	-1.74525	0.5509	0.5522	-2.4165	-4.16175	0.5922	0.5874	-3.62475	-11.814	0.6742	0.6666	-6.1755	-12.2167	0.9181	0.9062	-24.5677	-22.9567	1.0686	1.0424	-9.53175	-19.7347	1.2058	1.22	0.93975	-23.091	1.4235	1.4236	-11.5455	-14.9018	1.6552	1.653	-13.0222	-10.6058
		9.73333		0.367	0.3628	-2.148	-6.444	0.3967	0.399	-1.74525	-3.222	0.4486	0.4492	-0.67125	0.537	0.5531	0.5463	0.537	-12.0825	0.5926	0.5863	-3.08775	-13.2907	0.6729	0.6719	-7.92075	-5.1015	0.921	0.9052	-20.6745	-24.2993	1.0665	1.0458	-12.351	-15.1702	1.2055	1.215	0.537	-29.8035	1.4219	1.4238	-13.6935	-14.6333	1.6597	1.6517	-6.981	-12.351
		9.8		0.3673	0.3632	-1.74525	-5.907	0.3943	0.3978	-4.96725	-4.833	0.4473	0.4457	-2.4165	-4.16175	0.5498	0.5492	-3.89325	-8.18925	0.5881	0.586	-9.129	-13.6935	0.6738	0.673	-6.7125	-3.62475	0.9278	0.9053	-11.5455	-24.165	1.0638	1.0494	-15.9757	-10.3372	1.2143	1.2169	12.351	-27.2527	1.4229	1.4204	-12.351	-19.1978	1.6518	1.6438	-17.5868	-22.9568
		9.86667		0.3662	0.3627	-3.222	-6.57825	0.3941	0.3989	-5.23575	-3.35625	0.4443	0.4436	-6.444	-6.981	0.5479	0.5493	-6.444	-8.055	0.5896	0.5865	-7.11525	-13.0222	0.672	0.6688	-9.129	-9.26325	0.9427	0.9083	8.45775	-20.1375	1.0635	1.0464	-16.3785	-14.3647	1.2076	1.221	3.35625	-21.7485	1.4221	1.4266	-13.425	-10.8743	1.6602	1.6424	-6.30975	-24.8363
		9.93333		0.3664	0.3641	-2.9535	-4.69875	0.3955	0.3999	-3.35625	-2.01375	0.4438	0.4445	-7.11525	-5.77275	0.5486	0.5477	-5.50425	-10.203	0.5916	0.5846	-4.43025	-15.573	0.6695	0.6748	-12.4852	-1.20825	0.9331	0.9086	-4.43025	-19.7348	1.0675	1.0466	-11.0085	-14.0963	1.2049	1.2155	-0.2685	-29.1322	1.4321	1.4238	0	-14.6333	1.6513	1.6453	-18.258	-20.943
		10		0.3687	0.3649	0.13425	-3.62475	0.3956	0.398	-3.222	-4.5645	0.4457	0.4472	-4.5645	-2.148	0.5492	0.5459	-4.69875	-12.6195	0.5916	0.5894	-4.43025	-9.129	0.6745	0.6722	-5.77275	-4.69875	0.9235	0.9063	-17.3183	-22.8225	1.0707	1.0453	-6.7125	-15.8415	1.2097	1.2142	6.1755	-30.8775	1.4345	1.4207	3.222	-18.795	1.6562	1.6416	-11.6798	-25.9103
		10.0667		0.3677	0.3637	-1.20825	-5.23575	0.392	0.3983	-8.055	-4.16175	0.4471	0.4451	-2.685	-4.96725	0.55	0.5491	-3.62475	-8.3235	0.5935	0.5856	-1.8795	-14.2305	0.6699	0.6705	-11.9482	-6.981	0.921	0.9098	-20.6745	-18.1237	1.0689	1.0469	-9.129	-13.6935	1.2092	1.2158	5.50425	-28.7295	1.4249	1.4189	-9.666	-21.2115	1.6527	1.6509	-16.3785	-13.425
		10.1333		0.3703	0.3635	2.28225	-5.50425	0.3967	0.3982	-1.74525	-4.296	0.4467	0.4435	-3.222	-7.11525	0.551	0.5479	-2.28225	-9.9345	0.5916	0.5862	-4.43025	-13.425	0.6717	0.6669	-9.53175	-11.814	0.9237	0.9099	-17.0498	-17.9895	1.0715	1.0487	-5.6385	-11.277	1.2096	1.2138	6.04125	-31.4145	1.4193	1.4208	-17.184	-18.6608	1.6603	1.6481	-6.1755	-17.184
		10.2		0.3681	0.3638	-0.67125	-5.1015	0.3943	0.3964	-4.96725	-6.7125	0.4425	0.4432	-8.8605	-7.518	0.5508	0.5502	-2.55075	-6.84675	0.593	0.5845	-2.55075	-15.7072	0.6769	0.6693	-2.55075	-8.592	0.9234	0.9032	-17.4525	-26.9842	1.0696	1.0513	-8.18925	-7.7865	1.2058	1.2104	0.93975	-35.979	1.4239	1.4232	-11.0085	-15.4388	1.6503	1.6492	-19.6005	-15.7073
		10.2667		0.3658	0.3639	-3.759	-4.96725	0.3958	0.3967	-2.9535	-6.30975	0.446	0.4432	-4.16175	-7.518	0.5505	0.5501	-2.9535	-6.981	0.5936	0.5852	-1.74525	-14.7675	0.6746	0.6715	-5.6385	-5.6385	0.9233	0.9057	-17.5867	-23.628	1.0679	1.0515	-10.4715	-7.518	1.2062	1.213	1.47675	-32.4885	1.4283	1.4249	-5.1015	-13.1565	1.6527	1.6397	-16.3785	-28.461
		10.3333		0.3675	0.3662	-1.47675	-1.8795	0.3944	0.3973	-4.833	-5.50425	0.445	0.447	-5.50425	-2.4165	0.5536	0.549	1.20825	-8.45775	0.5913	0.5835	-4.833	-17.0497	0.6672	0.6721	-15.573	-4.833	0.9239	0.91	-16.7812	-17.8553	1.0666	1.0473	-12.2168	-13.1565	1.2097	1.2137	6.1755	-31.5487	1.425	1.4208	-9.53175	-18.6608	1.655	1.6407	-13.2908	-27.1185
		10.4		0.3669	0.365	-2.28225	-3.4905	0.3947	0.3961	-4.43025	-7.11525	0.4443	0.4447	-6.444	-5.50425	0.5528	0.5502	0.13425	-6.84675	0.5889	0.5859	-8.055	-13.8277	0.6703	0.6683	-11.4112	-9.9345	0.9221	0.9042	-19.1977	-25.6418	1.0686	1.0413	-9.53175	-21.2115	1.2087	1.2135	4.833	-31.8173	1.4223	1.4116	-13.1565	-31.0118	1.6501	1.6463	-19.869	-19.6005
		10.4667		0.3673	0.3671	-1.74525	-0.67125	0.3973	0.3988	-0.93975	-3.4905	0.4453	0.4448	-5.1015	-5.37	0.5515	0.548	-1.611	-9.80025	0.5927	0.5857	-2.9535	-14.0962	0.6694	0.6735	-12.6195	-2.9535	0.9262	0.9024	-13.6935	-28.0583	1.0687	1.0492	-9.3975	-10.6058	1.2096	1.212	6.04125	-33.831	1.4234	1.4209	-11.6797	-18.5265	1.6595	1.6456	-7.2495	-20.5403
		10.5333		0.3664	0.3664	-2.9535	-1.611	0.3951	0.4009	-3.89325	-0.67125	0.4438	0.4439	-7.11525	-6.57825	0.5503	0.5488	-3.222	-8.72625	0.59	0.5847	-6.57825	-15.4387	0.6713	0.672	-10.0688	-4.96725	0.9324	0.908	-5.37	-20.5403	1.0655	1.0496	-13.6935	-10.0687	1.2105	1.2155	7.2495	-29.1322	1.4253	1.4184	-9.129	-21.8827	1.6602	1.636	-6.30975	-33.4283
		10.6		0.3673	0.3668	-1.74525	-1.074	0.3944	0.3979	-4.833	-4.69875	0.4454	0.4441	-4.96725	-6.30975	0.5504	0.5501	-3.08775	-6.981	0.5921	0.5867	-3.759	-12.7537	0.6706	0.6691	-11.0085	-8.8605	0.9286	0.9072	-10.4715	-21.6142	1.0669	1.0449	-11.814	-16.3785	1.2132	1.2119	10.8742	-33.9652	1.4211	1.4197	-14.7675	-20.1375	1.6593	1.6384	-7.518	-30.2063
		10.6667		0.3662	0.3667	-3.222	-1.20825	0.3923	0.3985	-7.65225	-3.89325	0.4445	0.447	-6.1755	-2.4165	0.5515	0.5475	-1.611	-10.4715	0.5903	0.5837	-6.1755	-16.7812	0.6722	0.6635	-8.8605	-16.3785	0.924	0.9091	-16.647	-19.0635	1.0705	1.047	-6.981	-13.5592	1.2085	1.2124	4.5645	-33.294	1.4236	1.4223	-11.4112	-16.647	1.6574	1.6474	-10.0687	-18.1238
		10.7333		0.3644	0.3647	-5.6385	-3.89325	0.3946	0.3978	-4.5645	-4.833	0.4442	0.4451	-6.57825	-4.96725	0.5498	0.5468	-3.89325	-11.4113	0.5928	0.5888	-2.81925	-9.9345	0.6722	0.6687	-8.8605	-9.3975	0.9183	0.9087	-24.2993	-19.6005	1.0707	1.045	-6.7125	-16.2442	1.2048	1.2158	-0.40275	-28.7295	1.4237	1.4208	-11.277	-18.6608	1.6551	1.647	-13.1565	-18.6608
		10.8		0.368	0.3642	-0.8055	-4.5645	0.3947	0.3976	-4.43025	-5.1015	0.4439	0.4425	-6.981	-8.45775	0.5498	0.5451	-3.89325	-13.6935	0.5935	0.5882	-1.8795	-10.74	0.6717	0.6715	-9.53175	-5.6385	0.9223	0.9081	-18.9292	-20.406	1.071	1.0464	-6.30975	-14.3647	1.2066	1.2201	2.01375	-22.9568	1.4202	1.4172	-15.9758	-23.4938	1.6522	1.6494	-17.0498	-15.4388
		10.8667		0.368	0.3663	-0.8055	-1.74525	0.3929	0.4	-6.84675	-1.8795	0.4448	0.4468	-5.77275	-2.685	0.5502	0.5469	-3.35625	-11.277	0.5929	0.5866	-2.685	-12.888	0.6692	0.6764	-12.888	0.93975	0.9231	0.9049	-17.8552	-24.702	1.0672	1.0492	-11.4113	-10.6058	1.2136	1.2196	11.4112	-23.628	1.4245	1.4211	-10.203	-18.258	1.6533	1.6442	-15.573	-22.4198
		10.9333		0.3676	0.3668	-1.3425	-1.074	0.392	0.4	-8.055	-1.8795	0.4429	0.4482	-8.3235	-0.8055	0.5506	0.5482	-2.81925	-9.53175	0.5931	0.5843	-2.4165	-15.9757	0.673	0.6713	-7.7865	-5.907	0.9298	0.9037	-8.8605	-26.313	1.0633	1.0433	-16.647	-18.5265	1.2053	1.2178	0.2685	-26.0445	1.4241	1.4307	-10.74	-5.37	1.6583	1.6367	-8.8605	-32.4885
		11		0.3679	0.3666	-0.93975	-1.3425	0.3948	0.3984	-4.296	-4.0275	0.4433	0.4452	-7.7865	-4.833	0.5494	0.5459	-4.43025	-12.6195	0.5927	0.5864	-2.9535	-13.1565	0.6715	0.6694	-9.80025	-8.45775	0.9261	0.9037	-13.8277	-26.313	1.0697	1.0468	-8.055	-13.8277	1.2095	1.2149	5.907	-29.9377	1.4271	1.4204	-6.7125	-19.1978	1.6532	1.6439	-15.7072	-22.8225
		11.0667		0.3656	0.3659	-4.0275	-2.28225	0.3948	0.4002	-4.296	-1.611	0.4463	0.4457	-3.759	-4.16175	0.5499	0.5492	-3.759	-8.18925	0.59	0.5872	-6.57825	-12.0825	0.6702	0.6727	-11.5455	-4.0275	0.9227	0.9078	-18.3923	-20.8087	1.0642	1.0445	-15.4388	-16.9155	1.2132	1.2134	10.8742	-31.9515	1.4267	1.4221	-7.2495	-16.9155	1.6524	1.6423	-16.7812	-24.9705
		11.1333		0.3654	0.3659	-4.296	-2.28225	0.3921	0.3966	-7.92075	-6.444	0.442	0.4448	-9.53175	-5.37	0.5491	0.548	-4.833	-9.80025	0.5906	0.5878	-5.77275	-11.277	0.6737	0.6715	-6.84675	-5.6385	0.925	0.906	-15.3045	-23.2252	1.065	1.0465	-14.3647	-14.2305	1.2095	1.2123	5.907	-33.4283	1.4266	1.4161	-7.38375	-24.9705	1.6557	1.6459	-12.351	-20.1375
		11.2		0.3673	0.3633	-1.74525	-5.77275	0.3945	0.398	-4.69875	-4.5645	0.4429	0.4446	-8.3235	-5.6385	0.5506	0.5474	-2.81925	-10.6058	0.5913	0.5885	-4.833	-10.3372	0.6687	0.6704	-13.5593	-7.11525	0.925	0.9062	-15.3045	-22.9567	1.0673	1.0412	-11.277	-21.3458	1.2072	1.2135	2.81925	-31.8173	1.4274	1.4166	-6.30975	-24.2993	1.6471	1.644	-23.8965	-22.6883
		11.2667		0.3684	0.3647	-0.2685	-3.89325	0.3963	0.3966	-2.28225	-6.444	0.4441	0.4465	-6.7125	-3.08775	0.5478	0.5505	-6.57825	-6.444	0.5894	0.5873	-7.38375	-11.9482	0.6733	0.6692	-7.38375	-8.72625	0.9176	0.9031	-25.239	-27.1185	1.0721	1.048	-4.833	-12.2167	1.2072	1.2193	2.81925	-24.0308	1.4274	1.4176	-6.30975	-22.9568	1.6486	1.6406	-21.8827	-27.2528
		11.3333		0.3661	0.3642	-3.35625	-4.5645	0.3941	0.3969	-5.23575	-6.04125	0.4435	0.4446	-7.518	-5.6385	0.5492	0.5487	-4.69875	-8.8605	0.5927	0.5863	-2.9535	-13.2907	0.6732	0.6684	-7.518	-9.80025	0.9234	0.903	-17.4525	-27.2528	1.0676	1.0448	-10.8742	-16.5127	1.2073	1.2148	2.9535	-30.072	1.4169	1.4156	-20.406	-25.6418	1.657	1.6391	-10.6058	-29.2665
		11.4		0.3662	0.3663	-3.222	-1.74525	0.3948	0.3987	-4.296	-3.62475	0.4442	0.4427	-6.57825	-8.18925	0.5524	0.5462	-0.40275	-12.2167	0.5899	0.5844	-6.7125	-15.8415	0.6736	0.6733	-6.981	-3.222	0.9257	0.9089	-14.3647	-19.332	1.0651	1.0482	-14.2305	-11.9482	1.2049	1.2124	-0.2685	-33.294	1.4268	1.4118	-7.11525	-30.7433	1.6539	1.6558	-14.7675	-6.84675
		11.4667		0.3677	0.3628	-1.20825	-6.444	0.3925	0.3956	-7.38375	-7.7865	0.4447	0.4431	-5.907	-7.65225	0.5527	0.5498	0	-7.38375	0.5901	0.5862	-6.444	-13.425	0.6707	0.6743	-10.8743	-1.8795	0.9291	0.908	-9.80025	-20.5403	1.0674	1.0471	-11.1428	-13.425	1.2025	1.2198	-3.4905	-23.3595	1.4205	1.4202	-15.573	-19.4663	1.6584	1.6499	-8.72625	-14.7675
		11.5333		0.3687	0.3653	0.13425	-3.08775	0.3925	0.3957	-7.38375	-7.65225	0.4444	0.4447	-6.30975	-5.50425	0.5541	0.5462	1.8795	-12.2167	0.5933	0.5835	-2.148	-17.0497	0.6742	0.6725	-6.1755	-4.296	0.9288	0.91	-10.203	-17.8553	1.0705	1.0472	-6.981	-13.2908	1.2099	1.2132	6.444	-32.22	1.4235	1.4196	-11.5455	-20.2718	1.6522	1.6445	-17.0498	-22.017
		11.6		0.3681	0.3637	-0.67125	-5.23575	0.3927	0.3966	-7.11525	-6.444	0.4466	0.4459	-3.35625	-3.89325	0.5515	0.5491	-1.611	-8.3235	0.5933	0.5873	-2.148	-11.9482	0.673	0.6688	-7.7865	-9.26325	0.9189	0.9076	-23.4937	-21.0773	1.0695	1.0423	-8.3235	-19.869	1.2101	1.2148	6.7125	-30.072	1.421	1.4174	-14.9017	-23.2252	1.6562	1.6376	-11.6798	-31.2803
		11.6667		0.3661	0.3607	-3.35625	-9.26325	0.3957	0.397	-3.08775	-5.907	0.4461	0.4478	-4.0275	-1.3425	0.5502	0.5508	-3.35625	-6.04125	0.5917	0.584	-4.296	-16.3785	0.6707	0.6727	-10.8743	-4.0275	0.922	0.9122	-19.332	-14.9017	1.0714	1.0424	-5.77275	-19.7347	1.2035	1.2175	-2.148	-26.4472	1.4246	1.4172	-10.0687	-23.4938	1.6559	1.6429	-12.0825	-24.165
		11.7333		0.3666	0.3628	-2.685	-6.444	0.3973	0.398	-0.93975	-4.5645	0.4455	0.4419	-4.833	-9.26325	0.5509	0.5497	-2.4165	-7.518	0.5913	0.5837	-4.833	-16.7812	0.6737	0.6745	-6.84675	-1.611	0.9202	0.906	-21.7485	-23.2252	1.0693	1.0421	-8.592	-20.1375	1.2024	1.2121	-3.62475	-33.6968	1.4215	1.4185	-14.2305	-21.7485	1.655	1.6519	-13.2908	-12.0825
		11.8		0.3659	0.3626	-3.62475	-6.7125	0.3934	0.3998	-6.1755	-2.148	0.4456	0.4438	-4.69875	-6.7125	0.5519	0.5517	-1.074	-4.833	0.5907	0.5841	-5.6385	-16.2442	0.6761	0.673	-3.62475	-3.62475	0.9213	0.9043	-20.2718	-25.5075	1.0679	1.045	-10.4715	-16.2442	1.2103	1.2122	6.981	-33.5625	1.4228	1.4218	-12.4852	-17.3183	1.654	1.6412	-14.6333	-26.4473
		11.8667		0.3672	0.3646	-1.8795	-4.0275	0.3914	0.397	-8.8605	-5.907	0.4433	0.4457	-7.7865	-4.16175	0.551	0.5491	-2.28225	-8.3235	0.592	0.5855	-3.89325	-14.3647	0.6708	0.6684	-10.74	-9.80025	0.9219	0.9128	-19.4662	-14.0963	1.0696	1.0467	-8.18925	-13.962	1.2093	1.2166	5.6385	-27.6555	1.4237	1.4183	-11.277	-22.017	1.6558	1.642	-12.2168	-25.3733
		11.9333		0.3667	0.3621	-2.55075	-7.38375	0.3926	0.3966	-7.2495	-6.444	0.443	0.4454	-8.18925	-4.5645	0.552	0.5476	-0.93975	-10.3373	0.5899	0.5852	-6.7125	-14.7675	0.6743	0.6681	-6.04125	-10.203	0.9269	0.9063	-12.7537	-22.8225	1.0667	1.0478	-12.0825	-12.4852	1.2084	1.2199	4.43025	-23.2252	1.4166	1.4224	-20.8087	-16.5128	1.6577	1.6409	-9.666	-26.85
		12		0.3657	0.3639	-3.89325	-4.96725	0.3939	0.3958	-5.50425	-7.518	0.4435	0.4461	-7.518	-3.62475	0.5492	0.5474	-4.69875	-10.6058	0.5905	0.5849	-5.907	-15.1702	0.6718	0.6671	-9.3975	-11.5455	0.9221	0.9061	-19.1977	-23.091	1.0649	1.043	-14.499	-18.9292	1.2054	1.2115	0.40275	-34.5023	1.4226	1.418	-12.7537	-22.4198	1.657	1.6492	-10.6058	-15.7073
		12.0667		0.3669	0.3643	-2.28225	-4.43025	0.3948	0.3989	-4.296	-3.35625	0.4423	0.4449	-9.129	-5.23575	0.5533	0.5478	0.8055	-10.0688	0.5914	0.585	-4.69875	-15.036	0.6746	0.6736	-5.6385	-2.81925	0.9206	0.9091	-21.2115	-19.0635	1.0652	1.0434	-14.0963	-18.3922	1.2065	1.2154	1.8795	-29.2665	1.4222	1.4178	-13.2908	-22.6883	1.6573	1.6403	-10.203	-27.6555
		12.1333		0.3677	0.3654	-1.20825	-2.9535	0.3937	0.3972	-5.77275	-5.6385	0.4442	0.4454	-6.57825	-4.5645	0.5491	0.5474	-4.833	-10.6058	0.5924	0.5879	-3.35625	-11.1427	0.6694	0.6708	-12.6195	-6.57825	0.9223	0.9031	-18.9292	-27.1185	1.0662	1.0415	-12.7537	-20.943	1.2048	1.2143	-0.40275	-30.7432	1.4183	1.4187	-18.5265	-21.48	1.6512	1.6405	-18.3922	-27.387
		12.2		0.3677	0.3658	-1.20825	-2.4165	0.3935	0.3981	-6.04125	-4.43025	0.4448	0.4462	-5.77275	-3.4905	0.5502	0.5458	-3.35625	-12.7538	0.5912	0.5859	-4.96725	-13.8277	0.6705	0.6698	-11.1427	-7.92075	0.9202	0.9043	-21.7485	-25.5075	1.0645	1.0443	-15.036	-17.184	1.207	1.2189	2.55075	-24.5677	1.4217	1.4174	-13.962	-23.2252	1.6462	1.6397	-25.1047	-28.461
		12.2667		0.3668	0.3654	-2.4165	-2.9535	0.3963	0.396	-2.28225	-7.2495	0.4448	0.4449	-5.77275	-5.23575	0.5493	0.5472	-4.5645	-10.8742	0.5895	0.5853	-7.2495	-14.6332	0.6691	0.6664	-13.0222	-12.4852	0.9199	0.9025	-22.1512	-27.924	1.0633	1.0466	-16.647	-14.0963	1.2086	1.2187	4.69875	-24.8363	1.4257	1.4206	-8.592	-18.9292	1.6498	1.6447	-20.2718	-21.7485
		12.3333		0.3686	0.3651	0	-3.35625	0.3943	0.3976	-4.96725	-5.1015	0.4516	0.4448	3.35625	-5.37	0.5495	0.5475	-4.296	-10.4715	0.5897	0.5872	-6.981	-12.0825	0.6701	0.667	-11.6797	-11.6797	0.929	0.9082	-9.9345	-20.2717	1.068	1.0425	-10.3373	-19.6005	1.2051	1.2129	0	-32.6227	1.4224	1.4105	-13.0222	-32.4885	1.6466	1.6448	-24.5678	-21.6143
		12.4		0.3661	0.3673	-3.35625	-0.40275	0.3936	0.3968	-5.907	-6.1755	0.4475	0.4443	-2.148	-6.04125	0.5492	0.549	-4.69875	-8.45775	0.5912	0.5843	-4.96725	-15.9757	0.6701	0.671	-11.6797	-6.30975	0.9219	0.9031	-19.4662	-27.1185	1.0657	1.0494	-13.425	-10.3372	1.2095	1.2124	5.907	-33.294	1.4229	1.4247	-12.351	-13.425	1.6568	1.6455	-10.8743	-20.6745
		12.4667		0.3663	0.3657	-3.08775	-2.55075	0.3946	0.3967	-4.5645	-6.30975	0.446	0.4482	-4.16175	-0.8055	0.5521	0.547	-0.8055	-11.1428	0.5928	0.5863	-2.81925	-13.2907	0.6728	0.6676	-8.055	-10.8742	0.9228	0.9034	-18.258	-26.7158	1.0625	1.0427	-17.721	-19.332	1.2096	1.2105	6.04125	-35.8447	1.4284	1.4084	-4.96725	-35.3077	1.6517	1.6386	-17.721	-29.9378
		12.5333		0.369	0.364	0.537	-4.833	0.3924	0.3977	-7.518	-4.96725	0.4421	0.4456	-9.3975	-4.296	0.5515	0.545	-1.611	-13.8278	0.593	0.5827	-2.55075	-18.1237	0.67	0.6643	-11.814	-15.3045	0.9244	0.9046	-16.11	-25.1048	1.0668	1.046	-11.9483	-14.9017	1.2088	1.2144	4.96725	-30.609	1.4181	1.4165	-18.795	-24.4335	1.6566	1.635	-11.1427	-34.7708
		12.6		0.3687	0.3623	0.13425	-7.11525	0.3933	0.397	-6.30975	-5.907	0.443	0.4466	-8.18925	-2.9535	0.5509	0.5503	-2.4165	-6.7125	0.5902	0.5855	-6.30975	-14.3647	0.6695	0.665	-12.4852	-14.3647	0.9167	0.9071	-26.4472	-21.7485	1.0658	1.041	-13.2907	-21.6142	1.2103	1.2111	6.981	-35.0392	1.4171	1.4176	-20.1375	-22.9568	1.6536	1.6459	-15.1703	-20.1375
		12.6667		0.3676	0.3622	-1.3425	-7.2495	0.3944	0.3976	-4.833	-5.1015	0.4437	0.4422	-7.2495	-8.8605	0.5537	0.5466	1.3425	-11.6798	0.593	0.5864	-2.55075	-13.1565	0.6693	0.6666	-12.7538	-12.2167	0.9189	0.9054	-23.4937	-24.0308	1.0682	1.0431	-10.0687	-18.795	1.2144	1.2111	12.4852	-35.0392	1.432	1.4161	-0.13425	-24.9705	1.6604	1.6452	-6.04125	-21.0773
		12.7333		0.3687	0.3643	0.13425	-4.43025	0.393	0.4002	-6.7125	-1.611	0.4446	0.4441	-6.04125	-6.30975	0.5498	0.5467	-3.89325	-11.5455	0.5908	0.5838	-5.50425	-16.647	0.6764	0.6659	-3.222	-13.1565	0.9216	0.9077	-19.869	-20.943	1.0657	1.048	-13.425	-12.2167	1.2055	1.2163	0.537	-28.0583	1.4181	1.4247	-18.795	-13.425	1.6474	1.6481	-23.4938	-17.184
		12.8		0.3666	0.3634	-2.685	-5.6385	0.393	0.3959	-6.7125	-7.38375	0.4424	0.4429	-8.99475	-7.92075	0.5497	0.5484	-4.0275	-9.26325	0.5933	0.5843	-2.148	-15.9757	0.6735	0.6689	-7.11525	-9.129	0.9234	0.9051	-17.4525	-24.4335	1.0675	1.0452	-11.0085	-15.9758	1.2068	1.2102	2.28225	-36.2475	1.4274	1.4148	-6.30975	-26.7158	1.6628	1.637	-2.81925	-32.0858
		12.8667		0.3658	0.3618	-3.759	-7.7865	0.3938	0.3991	-5.6385	-3.08775	0.4448	0.4435	-5.77275	-7.11525	0.5505	0.5453	-2.9535	-13.425	0.5901	0.5845	-6.444	-15.7072	0.6785	0.6755	-0.40275	-0.2685	0.9202	0.9039	-21.7485	-26.0445	1.0725	1.0415	-4.296	-20.943	1.206	1.213	1.20825	-32.4885	1.4198	1.4144	-16.5127	-27.2528	1.6468	1.6359	-24.2993	-33.5625
		12.9333		0.3662	0.3645	-3.222	-4.16175	0.3953	0.3986	-3.62475	-3.759	0.4455	0.4423	-4.833	-8.72625	0.5469	0.5459	-7.7865	-12.6195	0.5916	0.5846	-4.43025	-15.573	0.6768	0.6716	-2.685	-5.50425	0.9278	0.904	-11.5455	-25.9102	1.0682	1.0462	-10.0687	-14.6332	1.2114	1.2156	8.45775	-28.998	1.4241	1.4204	-10.74	-19.1978	1.6598	1.6403	-6.84675	-27.6555
		13		0.3673	0.3658	-1.74525	-2.4165	0.3929	0.3949	-6.84675	-8.72625	0.4454	0.4421	-4.96725	-8.99475	0.5542	0.5443	2.01375	-14.7675	0.5905	0.5835	-5.907	-17.0497	0.6704	0.6653	-11.277	-13.962	0.9375	0.8998	1.47675	-31.5487	1.0647	1.0422	-14.7675	-20.0032	1.2063	1.2128	1.611	-32.757	1.4227	1.4203	-12.6195	-19.332	1.6562	1.6448	-11.6798	-21.6143
		13.0667		0.3671	0.3655	-2.01375	-2.81925	0.394	0.3961	-5.37	-7.11525	0.4434	0.4454	-7.65225	-4.5645	0.5498	0.5439	-3.89325	-15.3045	0.5911	0.5831	-5.1015	-17.5868	0.6712	0.6712	-10.203	-6.04125	0.93	0.9014	-8.592	-29.4008	1.0687	1.0381	-9.3975	-25.5075	1.2078	1.2134	3.62475	-31.9515	1.432	1.4112	-0.13425	-31.5488	1.6544	1.6471	-14.0963	-18.5265
		13.1333		0.3667	0.3618	-2.55075	-7.7865	0.3946	0.3961	-4.5645	-7.11525	0.4457	0.4416	-4.5645	-9.666	0.55	0.5468	-3.62475	-11.4113	0.5932	0.5829	-2.28225	-17.8552	0.6721	0.6745	-8.99475	-1.611	0.9184	0.9057	-24.165	-23.628	1.0691	1.0422	-8.8605	-20.0032	1.2087	1.2136	4.833	-31.683	1.4306	1.4109	-2.01375	-31.9515	1.6541	1.6329	-14.499	-37.59
		13.2		0.3642	0.3631	-5.907	-6.04125	0.3927	0.3969	-7.11525	-6.04125	0.4439	0.4459	-6.981	-3.89325	0.5491	0.5438	-4.833	-15.4388	0.5905	0.5855	-5.907	-14.3647	0.6703	0.6723	-11.4112	-4.5645	0.9229	0.9049	-18.1237	-24.702	1.0641	1.0393	-15.573	-23.8965	1.203	1.2084	-2.81925	-38.664	1.4264	1.4132	-7.65225	-28.8638	1.6515	1.647	-17.9895	-18.6608
		13.2667		0.3645	0.3638	-5.50425	-5.1015	0.3916	0.3976	-8.592	-5.1015	0.4442	0.4429	-6.57825	-7.92075	0.5481	0.5458	-6.1755	-12.7538	0.5897	0.5836	-6.981	-16.9155	0.6695	0.6681	-12.4852	-10.203	0.9189	0.9026	-23.4937	-27.7898	1.0692	1.0429	-8.72625	-19.0635	1.2032	1.2128	-2.55075	-32.757	1.4199	1.4176	-16.3785	-22.9568	1.6513	1.6372	-18.258	-31.8173
		13.3333		0.3669	0.3638	-2.28225	-5.1015	0.3942	0.3966	-5.1015	-6.444	0.4433	0.4429	-7.7865	-7.92075	0.5497	0.5466	-4.0275	-11.6798	0.5937	0.5836	-1.611	-16.9155	0.6678	0.6679	-14.7675	-10.4715	0.9207	0.9057	-21.0773	-23.628	1.0626	1.0426	-17.5868	-19.4662	1.2024	1.2105	-3.62475	-35.8447	1.42	1.418	-16.2442	-22.4198	1.6458	1.6479	-25.6418	-17.4525
		13.4		0.3678	0.3628	-1.074	-6.444	0.3938	0.3991	-5.6385	-3.08775	0.4441	0.4439	-6.7125	-6.57825	0.5545	0.544	2.4165	-15.1703	0.5903	0.5809	-6.1755	-20.5402	0.671	0.6662	-10.4715	-12.7537	0.9181	0.9034	-24.5677	-26.7158	1.0627	1.0463	-17.4525	-14.499	1.2069	1.2125	2.4165	-33.1598	1.4248	1.4177	-9.80025	-22.8225	1.6525	1.6454	-16.647	-20.8088
		13.4667		0.3662	0.3635	-3.222	-5.50425	0.3949	0.3948	-4.16175	-8.8605	0.4421	0.4442	-9.3975	-6.1755	0.552	0.5462	-0.93975	-12.2167	0.5919	0.5848	-4.0275	-15.3045	0.6688	0.6641	-13.425	-15.573	0.9276	0.9028	-11.814	-27.5213	1.0672	1.0397	-11.4113	-23.3595	1.2036	1.209	-2.01375	-37.8585	1.4249	1.4194	-9.666	-20.5403	1.653	1.6425	-15.9758	-24.702
		13.5333		0.3659	0.3656	-3.62475	-2.685	0.3925	0.3983	-7.38375	-4.16175	0.4444	0.446	-6.30975	-3.759	0.5503	0.5468	-3.222	-11.4113	0.5929	0.5844	-2.685	-15.8415	0.6698	0.6682	-12.0825	-10.0687	0.9218	0.9025	-19.6005	-27.924	1.0674	1.0459	-11.1428	-15.036	1.207	1.2119	2.55075	-33.9652	1.42	1.414	-16.2442	-27.7898	1.6493	1.6435	-20.943	-23.3595
		13.6		0.367	0.3636	-2.148	-5.37	0.3956	0.3962	-3.222	-6.981	0.4444	0.4407	-6.30975	-10.8742	0.5481	0.5451	-6.1755	-13.6935	0.5896	0.5861	-7.11525	-13.5593	0.6702	0.664	-11.5455	-15.7072	0.92	0.9037	-22.017	-26.313	1.068	1.0445	-10.3373	-16.9155	1.2066	1.2054	2.01375	-42.6915	1.4205	1.4156	-15.573	-25.6418	1.6626	1.6509	-3.08775	-13.425
		13.6667		0.3669	0.361	-2.28225	-8.8605	0.3939	0.3962	-5.50425	-6.981	0.4432	0.4413	-7.92075	-10.0687	0.5477	0.5465	-6.7125	-11.814	0.5917	0.5859	-4.296	-13.8277	0.6721	0.665	-8.99475	-14.3647	0.9242	0.9051	-16.3785	-24.4335	1.0659	1.0424	-13.1565	-19.7347	1.208	1.2104	3.89325	-35.979	1.4203	1.4204	-15.8415	-19.1978	1.6578	1.6425	-9.53175	-24.702
		13.7333		0.365	0.3614	-4.833	-8.3235	0.3955	0.3963	-3.35625	-6.84675	0.4442	0.4407	-6.57825	-10.8742	0.5487	0.5441	-5.37	-15.036	0.593	0.5851	-2.55075	-14.9017	0.6704	0.6711	-11.277	-6.1755	0.9285	0.9031	-10.6057	-27.1185	1.0684	1.0448	-9.80025	-16.5127	1.2089	1.2137	5.1015	-31.5487	1.4169	1.4218	-20.406	-17.3183	1.6578	1.6404	-9.53175	-27.5213
		13.8		0.3648	0.3644	-5.1015	-4.296	0.397	0.3972	-1.3425	-5.6385	0.4428	0.4404	-8.45775	-11.277	0.5525	0.5471	-0.2685	-11.0085	0.5898	0.5863	-6.84675	-13.2907	0.671	0.6689	-10.4715	-9.129	0.9203	0.9022	-21.6143	-28.3267	1.0663	1.0435	-12.6195	-18.258	1.2049	1.2148	-0.2685	-30.072	1.4195	1.4167	-16.9155	-24.165	1.6535	1.6422	-15.3045	-25.1048
		13.8667		0.3676	0.3635	-1.3425	-5.50425	0.3941	0.3974	-5.23575	-5.37	0.4438	0.4447	-7.11525	-5.50425	0.5497	0.5447	-4.0275	-14.2305	0.5886	0.5858	-8.45775	-13.962	0.676	0.6653	-3.759	-13.962	0.9205	0.9027	-21.3457	-27.6555	1.0674	1.0497	-11.1428	-9.9345	1.2066	1.2148	2.01375	-30.072	1.4181	1.4194	-18.795	-20.5403	1.6549	1.6472	-13.425	-18.3923
		13.9333		0.3681	0.3643	-0.67125	-4.43025	0.3953	0.3965	-3.62475	-6.57825	0.444	0.4443	-6.84675	-6.04125	0.5522	0.5455	-0.67125	-13.1565	0.5916	0.5848	-4.43025	-15.3045	0.67	0.6656	-11.814	-13.5592	0.9196	0.9001	-22.554	-31.146	1.0662	1.0448	-12.7537	-16.5127	1.2051	1.2109	0	-35.3077	1.4234	1.4171	-11.6797	-23.628	1.6488	1.648	-21.6143	-17.3183
		14		0.3684	0.3631	-0.2685	-6.04125	0.3955	0.398	-3.35625	-4.5645	0.4426	0.4452	-8.72625	-4.833	0.5504	0.5445	-3.08775	-14.499	0.5922	0.5831	-3.62475	-17.5868	0.6696	0.6672	-12.351	-11.4112	0.9212	0.9027	-20.406	-27.6555	1.0652	1.0409	-14.0963	-21.7485	1.2048	1.2089	-0.40275	-37.9927	1.4232	1.4163	-11.9482	-24.702	1.6597	1.6397	-6.981	-28.461
		14.0667		0.3659	0.3637	-3.62475	-5.23575	0.3936	0.3966	-5.907	-6.444	0.4444	0.4461	-6.30975	-3.62475	0.55	0.5487	-3.62475	-8.8605	0.5915	0.5869	-4.5645	-12.4852	0.6721	0.672	-8.99475	-4.96725	0.922	0.9033	-19.332	-26.85	1.0636	1.0443	-16.2442	-17.184	1.2019	1.2118	-4.296	-34.0995	1.4217	1.416	-13.962	-25.1048	1.6563	1.6418	-11.5455	-25.6418
		14.1333		0.3653	0.3602	-4.43025	-9.9345	0.3925	0.3957	-7.38375	-7.65225	0.4423	0.4438	-9.129	-6.7125	0.5489	0.5456	-5.1015	-13.0222	0.5913	0.5873	-4.833	-11.9482	0.6691	0.6706	-13.0222	-6.84675	0.9201	0.9018	-21.8827	-28.8637	1.0641	1.0439	-15.573	-17.721	1.2055	1.212	0.537	-33.831	1.415	1.4163	-22.9567	-24.702	1.6581	1.6407	-9.129	-27.1185
		14.2		0.3667	0.3636	-2.55075	-5.37	0.3948	0.3976	-4.296	-5.1015	0.4443	0.4447	-6.444	-5.50425	0.5495	0.5477	-4.296	-10.203	0.5928	0.5838	-2.81925	-16.647	0.6723	0.6645	-8.72625	-15.036	0.9264	0.9079	-13.425	-20.6745	1.0621	1.0428	-18.258	-19.1977	1.2079	1.2109	3.759	-35.3077	1.4171	1.417	-20.1375	-23.7623	1.6487	1.6447	-21.7485	-21.7485
		14.2667		0.3672	0.3616	-1.8795	-8.055	0.3941	0.395	-5.23575	-8.592	0.4456	0.4433	-4.69875	-7.38375	0.5484	0.5442	-5.77275	-14.9017	0.59	0.5823	-6.57825	-18.6607	0.6733	0.6722	-7.38375	-4.69875	0.9195	0.9004	-22.6882	-30.7432	1.0639	1.0428	-15.8415	-19.1977	1.2051	1.2096	0	-37.053	1.4248	1.4123	-9.80025	-30.072	1.658	1.6365	-9.26325	-32.757
		14.3333		0.3662	0.363	-3.222	-6.1755	0.3952	0.397	-3.759	-5.907	0.4429	0.4437	-8.3235	-6.84675	0.5482	0.5475	-6.04125	-10.4715	0.5918	0.5819	-4.16175	-19.1977	0.6744	0.6714	-5.907	-5.77275	0.9216	0.9039	-19.869	-26.0445	1.0652	1.0408	-14.0963	-21.8827	1.2052	1.2121	0.13425	-33.6968	1.4256	1.4131	-8.72625	-28.998	1.6477	1.6403	-23.091	-27.6555
		14.4		0.3647	0.3619	-5.23575	-7.65225	0.3943	0.3978	-4.96725	-4.833	0.4448	0.4451	-5.77275	-4.96725	0.5468	0.5455	-7.92075	-13.1565	0.5924	0.5818	-3.35625	-19.332	0.672	0.6687	-9.129	-9.3975	0.9234	0.9013	-17.4525	-29.535	1.0643	1.0417	-15.3045	-20.6745	1.2062	1.2125	1.47675	-33.1598	1.419	1.4201	-17.5867	-19.6005	1.6504	1.6406	-19.4662	-27.2528
		14.4667		0.3668	0.3642	-2.4165	-4.5645	0.3951	0.3983	-3.89325	-4.16175	0.4446	0.4443	-6.04125	-6.04125	0.5518	0.5451	-1.20825	-13.6935	0.5912	0.5841	-4.96725	-16.2442	0.672	0.6664	-9.129	-12.4852	0.9198	0.9092	-22.2855	-18.9292	1.0704	1.042	-7.11525	-20.2717	1.2065	1.2137	1.8795	-31.5487	1.4274	1.4194	-6.30975	-20.5403	1.6579	1.6465	-9.3975	-19.332
		14.5333		0.365	0.3605	-4.833	-9.53175	0.3944	0.3969	-4.833	-6.04125	0.4442	0.4452	-6.57825	-4.833	0.5466	0.545	-8.18925	-13.8278	0.5916	0.5838	-4.43025	-16.647	0.6721	0.6655	-8.99475	-13.6935	0.9203	0.9014	-21.6143	-29.4008	1.067	1.0386	-11.6798	-24.8363	1.2083	1.2143	4.296	-30.7432	1.4204	1.4129	-15.7072	-29.2665	1.6542	1.6343	-14.3648	-35.7105
		14.6		0.3661	0.3616	-3.35625	-8.055	0.3924	0.3962	-7.518	-6.981	0.4437	0.4471	-7.2495	-2.28225	0.5465	0.5449	-8.3235	-13.962	0.5905	0.5817	-5.907	-19.4662	0.6719	0.6646	-9.26325	-14.9017	0.9188	0.9039	-23.628	-26.0445	1.0644	1.0396	-15.1702	-23.4937	1.2004	1.2171	-6.30975	-26.9842	1.4223	1.4161	-13.1565	-24.9705	1.6487	1.6409	-21.7485	-26.85
		14.6667		0.3648	0.364	-5.1015	-4.833	0.3952	0.3963	-3.759	-6.84675	0.4413	0.4474	-10.4715	-1.8795	0.5491	0.5446	-4.833	-14.3647	0.5903	0.5882	-6.1755	-10.74	0.6734	0.664	-7.2495	-15.7072	0.9245	0.9016	-15.9757	-29.1323	1.071	1.0377	-6.30975	-26.0445	1.2061	1.2094	1.3425	-37.3215	1.4241	1.4138	-10.74	-28.0583	1.6517	1.6349	-17.721	-34.905
		14.7333		0.3653	0.3633	-4.43025	-5.77275	0.3964	0.3957	-2.148	-7.65225	0.4441	0.4437	-6.7125	-6.84675	0.5505	0.5487	-2.9535	-8.8605	0.594	0.5853	-1.20825	-14.6332	0.6722	0.6695	-8.8605	-8.3235	0.921	0.9061	-20.6745	-23.091	1.0675	1.0397	-11.0085	-23.3595	1.205	1.2132	-0.13425	-32.22	1.4192	1.4211	-17.3182	-18.258	1.6493	1.6453	-20.943	-20.943
		14.8		0.3659	0.3608	-3.62475	-9.129	0.3947	0.3955	-4.43025	-7.92075	0.4425	0.4421	-8.8605	-8.99475	0.5522	0.5475	-0.67125	-10.4715	0.5914	0.5841	-4.69875	-16.2442	0.6695	0.6712	-12.4852	-6.04125	0.9223	0.901	-18.9292	-29.9378	1.072	1.041	-4.96725	-21.6142	1.2048	1.2088	-0.40275	-38.127	1.4243	1.4183	-10.4715	-22.017	1.6532	1.6408	-15.7072	-26.9843
		14.8667		0.3668	0.3641	-2.4165	-4.69875	0.3942	0.396	-5.1015	-7.2495	0.4455	0.441	-4.833	-10.4715	0.5513	0.545	-1.8795	-13.8278	0.5906	0.585	-5.77275	-15.036	0.6702	0.6715	-11.5455	-5.6385	0.9176	0.9016	-25.239	-29.1323	1.0657	1.0423	-13.425	-19.869	1.2046	1.2081	-0.67125	-39.0668	1.4234	1.418	-11.6797	-22.4198	1.6545	1.6382	-13.962	-30.4748
		14.9333		0.366	0.3648	-3.4905	-3.759	0.3953	0.3965	-3.62475	-6.57825	0.4438	0.4415	-7.11525	-9.80025	0.5488	0.5448	-5.23575	-14.0963	0.5904	0.5832	-6.04125	-17.4525	0.6698	0.6685	-12.0825	-9.666	0.9192	0.8986	-23.091	-33.1598	1.0665	1.0409	-12.351	-21.7485	1.2024	1.2099	-3.62475	-36.6503	1.4223	1.4133	-13.1565	-28.7295	1.6494	1.6386	-20.8088	-29.9378
		15		0.3649	0.3657	-4.96725	-2.55075	0.3949	0.3973	-4.16175	-5.50425	0.4436	0.4418	-7.38375	-9.3975	0.5475	0.5451	-6.981	-13.6935	0.5932	0.5873	-2.28225	-11.9482	0.6719	0.6667	-9.26325	-12.0825	0.9195	0.9069	-22.6882	-22.017	1.0653	1.0427	-13.962	-19.332	1.2017	1.2063	-4.5645	-41.4832	1.4245	1.4129	-10.203	-29.2665	1.6468	1.6471	-24.2993	-18.5265
		15.0667		0.3651	0.3635	-4.69875	-5.50425	0.3929	0.4025	-6.84675	1.47675	0.4441	0.443	-6.7125	-7.7865	0.5486	0.5449	-5.50425	-13.962	0.5893	0.5829	-7.518	-17.8552	0.6734	0.6658	-7.2495	-13.2907	0.9185	0.9024	-24.0307	-28.0583	1.0686	1.0428	-9.53175	-19.1977	1.2088	1.2102	4.96725	-36.2475	1.4264	1.413	-7.65225	-29.1323	1.6533	1.6337	-15.573	-36.516
		15.1333		0.3635	0.361	-6.84675	-8.8605	0.3933	0.3976	-6.30975	-5.1015	0.4435	0.4433	-7.518	-7.38375	0.5506	0.5434	-2.81925	-15.9758	0.5913	0.5845	-4.833	-15.7072	0.6735	0.6637	-7.11525	-16.11	0.92	0.9026	-22.017	-27.7898	1.0672	1.0393	-11.4113	-23.8965	1.212	1.2094	9.26325	-37.3215	1.4223	1.4104	-13.1565	-32.6227	1.6518	1.6409	-17.5868	-26.85
		15.2		0.3671	0.3615	-2.01375	-8.18925	0.3954	0.3952	-3.4905	-8.3235	0.4424	0.4433	-8.99475	-7.38375	0.549	0.5464	-4.96725	-11.9483	0.5896	0.5796	-7.11525	-22.2855	0.6736	0.6665	-6.981	-12.351	0.9243	0.901	-16.2442	-29.9378	1.0611	1.0422	-19.6005	-20.0032	1.1993	1.2082	-7.7865	-38.9325	1.4195	1.4136	-16.9155	-28.3268	1.6564	1.6423	-11.4113	-24.9705
		15.2667		0.3652	0.3645	-4.5645	-4.16175	0.3925	0.3998	-7.38375	-2.148	0.4469	0.4432	-2.9535	-7.518	0.5488	0.5443	-5.23575	-14.7675	0.591	0.5832	-5.23575	-17.4525	0.6702	0.6668	-11.5455	-11.9482	0.9218	0.9012	-19.6005	-29.6692	1.0637	1.0388	-16.11	-24.5677	1.2079	1.2079	3.759	-39.3353	1.4211	1.4055	-14.7675	-39.201	1.6558	1.637	-12.2168	-32.0858
		15.3333		0.3668	0.3637	-2.4165	-5.23575	0.3944	0.3958	-4.833	-7.518	0.4574	0.4423	11.1427	-8.72625	0.5514	0.5423	-1.74525	-17.4525	0.589	0.5828	-7.92075	-17.9895	0.6664	0.6682	-16.647	-10.0687	0.9214	0.8987	-20.1375	-33.0255	1.0657	1.0398	-13.425	-23.2252	1.2054	1.21	0.40275	-36.516	1.4235	1.4128	-11.5455	-29.4008	1.6616	1.645	-4.43025	-21.3458
		15.4		0.3649	0.3638	-4.96725	-5.1015	0.3953	0.3943	-3.62475	-9.53175	0.457	0.4409	10.6057	-10.6057	0.5485	0.5455	-5.6385	-13.1565	0.5926	0.5832	-3.08775	-17.4525	0.6716	0.6698	-9.666	-7.92075	0.9159	0.8997	-27.5212	-31.683	1.0671	1.0399	-11.5455	-23.091	1.2079	1.2065	3.759	-41.2148	1.4219	1.4178	-13.6935	-22.6883	1.6523	1.6434	-16.9155	-23.4938
		15.4667		0.3657	0.3626	-3.89325	-6.7125	0.3952	0.3959	-3.759	-7.38375	0.4478	0.4437	-1.74525	-6.84675	0.5477	0.545	-6.7125	-13.8278	0.5881	0.5814	-9.129	-19.869	0.6689	0.6654	-13.2907	-13.8277	0.9241	0.9001	-16.5127	-31.146	1.0602	1.0442	-20.8087	-17.3182	1.2114	1.2087	8.45775	-38.2613	1.4198	1.4123	-16.5127	-30.072	1.6522	1.6367	-17.0498	-32.4885
		15.5333		0.3655	0.3601	-4.16175	-10.0688	0.396	0.3964	-2.685	-6.7125	0.445	0.4417	-5.50425	-9.53175	0.549	0.5456	-4.96725	-13.0222	0.5906	0.5844	-5.77275	-15.8415	0.6708	0.67	-10.74	-7.65225	0.9188	0.9011	-23.628	-29.8035	1.0647	1.0432	-14.7675	-18.6608	1.2056	1.2053	0.67125	-42.8257	1.4278	1.4086	-5.77275	-35.0393	1.6641	1.6411	-1.074	-26.5815
		15.6		0.3645	0.36	-5.50425	-10.203	0.3951	0.3959	-3.89325	-7.38375	0.446	0.4416	-4.16175	-9.666	0.5499	0.5426	-3.759	-17.0498	0.5899	0.5817	-6.7125	-19.4662	0.6702	0.662	-11.5455	-18.3922	0.9209	0.8987	-20.8087	-33.0255	1.0632	1.0367	-16.7813	-27.387	1.2063	1.2159	1.611	-28.5952	1.4217	1.4146	-13.962	-26.9842	1.6508	1.6539	-18.9293	-9.3975
		15.6667		0.3663	0.3631	-3.08775	-6.04125	0.3919	0.3959	-8.18925	-7.38375	0.4486	0.4421	-0.67125	-8.99475	0.5495	0.5435	-4.296	-15.8415	0.5971	0.58	2.9535	-21.7485	0.6709	0.6623	-10.6057	-17.9895	0.9233	0.8982	-17.5867	-33.6967	1.0631	1.0372	-16.9155	-26.7158	1.2038	1.2058	-1.74525	-42.1545	1.4277	1.4103	-5.907	-32.757	1.6503	1.6371	-19.6005	-31.9515
		15.7333		0.3645	0.3623	-5.50425	-7.11525	0.3952	0.3984	-3.759	-4.0275	0.4505	0.4429	1.8795	-7.92075	0.5506	0.5432	-2.81925	-16.2442	0.5905	0.5843	-5.907	-15.9757	0.6731	0.6598	-7.65225	-21.3457	0.9213	0.9047	-20.2718	-24.9705	1.0638	1.0396	-15.9757	-23.4937	1.2024	1.207	-3.62475	-40.5435	1.4209	1.4197	-15.036	-20.1375	1.6519	1.6449	-17.4525	-21.48
		15.8		0.3645	0.3616	-5.50425	-8.055	0.3947	0.3975	-4.43025	-5.23575	0.4449	0.4428	-5.6385	-8.055	0.5477	0.5454	-6.7125	-13.2908	0.5888	0.5813	-8.18925	-20.0032	0.6711	0.663	-10.3372	-17.0497	0.9186	0.8994	-23.8965	-32.0857	1.065	1.0444	-14.3647	-17.0497	1.2092	1.2048	5.50425	-43.497	1.4236	1.4195	-11.4112	-20.406	1.6556	1.647	-12.4853	-18.6608
		15.8667		0.3656	0.36	-4.0275	-10.203	0.3946	0.4014	-4.5645	0	0.4441	0.4436	-6.7125	-6.981	0.5481	0.544	-6.1755	-15.1703	0.5899	0.58	-6.7125	-21.7485	0.6686	0.6625	-13.6935	-17.721	0.9205	0.9047	-21.3457	-24.9705	1.0662	1.0428	-12.7537	-19.1977	1.2053	1.2047	0.2685	-43.6312	1.4226	1.4147	-12.7537	-26.85	1.6517	1.6475	-17.721	-17.9895
		15.9333		0.3662	0.3614	-3.222	-8.3235	0.3945	0.3959	-4.69875	-7.38375	0.447	0.4432	-2.81925	-7.518	0.5493	0.5469	-4.5645	-11.277	0.5925	0.5831	-3.222	-17.5868	0.6739	0.6631	-6.57825	-16.9155	0.9227	0.8973	-18.3923	-34.905	1.0658	1.0371	-13.2907	-26.85	1.2037	1.2087	-1.8795	-38.2613	1.4228	1.4099	-12.4852	-33.294	1.6588	1.6356	-8.18925	-33.9653
		16		0.365	0.3631	-4.833	-6.04125	0.3971	0.3982	-1.20825	-4.296	0.4444	0.4435	-6.30975	-7.11525	0.5495	0.5467	-4.296	-11.5455	0.589	0.5822	-7.92075	-18.795	0.6689	0.662	-13.2907	-18.3922	0.9172	0.9038	-25.776	-26.1787	1.0706	1.0431	-6.84675	-18.795	1.2112	1.2107	8.18925	-35.5762	1.4191	1.4165	-17.4525	-24.4335	1.655	1.6346	-13.2908	-35.3077
		16.0667		0.3637	0.3605	-6.57825	-9.53175	0.3932	0.3947	-6.444	-8.99475	0.4436	0.4466	-7.38375	-2.9535	0.5467	0.5479	-8.055	-9.9345	0.5884	0.5823	-8.72625	-18.6607	0.6725	0.6645	-8.45775	-15.036	0.9256	0.9029	-14.499	-27.387	1.0667	1.0398	-12.0825	-23.2252	1.2045	1.2095	-0.8055	-37.1872	1.426	1.4107	-8.18925	-32.22	1.648	1.6404	-22.6883	-27.5213
		16.1333		0.3655	0.3652	-4.16175	-3.222	0.396	0.3954	-2.685	-8.055	0.442	0.4423	-9.53175	-8.72625	0.5507	0.5465	-2.685	-11.814	0.5925	0.5804	-3.222	-21.2115	0.6716	0.6685	-9.666	-9.666	0.923	0.9019	-17.9895	-28.7295	1.0642	1.0392	-15.4388	-24.0308	1.2044	1.2054	-0.93975	-42.6915	1.4226	1.4148	-12.7537	-26.7158	1.6505	1.6393	-19.332	-28.998
		16.2		0.3658	0.362	-3.759	-7.518	0.395	0.3936	-4.0275	-10.4715	0.4462	0.4405	-3.89325	-11.1427	0.5515	0.5438	-1.611	-15.4388	0.5916	0.5821	-4.43025	-18.9293	0.669	0.6676	-13.1565	-10.8742	0.9175	0.8964	-25.3732	-36.1133	1.066	1.0363	-13.0222	-27.924	1.2031	1.2094	-2.685	-37.3215	1.4225	1.4195	-12.888	-20.406	1.6491	1.639	-21.2115	-29.4008
		16.2667		0.3656	0.3622	-4.0275	-7.2495	0.3965	0.3964	-2.01375	-6.7125	0.4485	0.4418	-0.8055	-9.3975	0.5474	0.5437	-7.11525	-15.573	0.59	0.5822	-6.57825	-18.795	0.6719	0.6661	-9.26325	-12.888	0.9174	0.9028	-25.5075	-27.5213	1.0654	1.0387	-13.8278	-24.702	1.209	1.2073	5.23575	-40.1408	1.42	1.4113	-16.2442	-31.4145	1.6446	1.6409	-27.2528	-26.85
		16.3333		0.3661	0.3636	-3.35625	-5.37	0.3928	0.3959	-6.981	-7.38375	0.4515	0.4412	3.222	-10.203	0.5484	0.5488	-5.77275	-8.72625	0.593	0.5812	-2.55075	-20.1375	0.6709	0.6622	-10.6057	-18.1237	0.92	0.8967	-22.017	-35.7105	1.068	1.0339	-10.3373	-31.146	1.2058	1.2091	0.93975	-37.7242	1.4176	1.4128	-19.4662	-29.4008	1.6558	1.6385	-12.2168	-30.072
		16.4		0.3654	0.3614	-4.296	-8.3235	0.3935	0.3951	-6.04125	-8.45775	0.4697	0.4414	27.6555	-9.9345	0.5467	0.5433	-8.055	-16.11	0.5959	0.5826	1.3425	-18.258	0.6717	0.6659	-9.53175	-13.1565	0.915	0.9016	-28.7295	-29.1323	1.0637	1.0481	-16.11	-12.0825	1.205	1.2068	-0.13425	-40.812	1.4181	1.4145	-18.795	-27.1185	1.6477	1.6318	-23.091	-39.0668
		16.4667		0.3645	0.3612	-5.50425	-8.592	0.3959	0.3964	-2.81925	-6.7125	0.4458	0.4397	-4.43025	-12.2167	0.5485	0.5453	-5.6385	-13.425	0.5903	0.5821	-6.1755	-18.9293	0.67	0.6648	-11.814	-14.6332	0.9196	0.9021	-22.554	-28.461	1.0697	1.0404	-8.055	-22.4197	1.2001	1.2109	-6.7125	-35.3077	1.4172	1.4141	-20.0032	-27.6555	1.6452	1.6356	-26.4473	-33.9653
		16.5333		0.3658	0.3612	-3.759	-8.592	0.3934	0.3961	-6.1755	-7.11525	0.4439	0.4429	-6.981	-7.92075	0.5487	0.5419	-5.37	-17.9895	0.5935	0.5799	-1.8795	-21.8827	0.6752	0.6629	-4.833	-17.184	0.921	0.901	-20.6745	-29.9378	1.0653	1.0407	-13.962	-22.017	1.2025	1.2183	-3.4905	-25.3733	1.4251	1.4156	-9.3975	-25.6418	1.6518	1.6358	-17.5868	-33.6968
		16.6		0.3663	0.3623	-3.08775	-7.11525	0.3946	0.3952	-4.5645	-8.3235	0.4461	0.4413	-4.0275	-10.0687	0.5474	0.5421	-7.11525	-17.721	0.5898	0.578	-6.84675	-24.4335	0.6721	0.6624	-8.99475	-17.8552	0.9185	0.8994	-24.0307	-32.0857	1.0683	1.0439	-9.9345	-17.721	1.2032	1.2101	-2.55075	-36.3818	1.4227	1.4168	-12.6195	-24.0308	1.6554	1.6375	-12.7537	-31.4145
		16.6667		0.367	0.3613	-2.148	-8.45775	0.3928	0.3989	-6.981	-3.35625	0.443	0.4411	-8.18925	-10.3372	0.5508	0.5426	-2.55075	-17.0498	0.5906	0.5819	-5.77275	-19.1977	0.6716	0.6662	-9.666	-12.7537	0.9195	0.9034	-22.6882	-26.7158	1.0686	1.0384	-9.53175	-25.1047	1.2091	1.2034	5.37	-45.3765	1.4274	1.4197	-6.30975	-20.1375	1.6522	1.6384	-17.0498	-30.2063
		16.7333		0.3676	0.3622	-1.3425	-7.2495	0.3956	0.3944	-3.222	-9.3975	0.4446	0.441	-6.04125	-10.4715	0.5495	0.5456	-4.296	-13.0222	0.5917	0.5807	-4.296	-20.8087	0.6694	0.6647	-12.6195	-14.7675	0.9227	0.8991	-18.3923	-32.4885	1.0636	1.0417	-16.2442	-20.6745	1.2003	1.2125	-6.444	-33.1598	1.4154	1.4153	-22.4197	-26.0445	1.6549	1.6341	-13.425	-35.979
		16.8		0.3663	0.362	-3.08775	-7.518	0.3954	0.3986	-3.4905	-3.759	0.4427	0.4401	-8.592	-11.6797	0.5483	0.5435	-5.907	-15.8415	0.5911	0.581	-5.1015	-20.406	0.6698	0.6681	-12.0825	-10.203	0.9206	0.9016	-21.2115	-29.1323	1.0651	1.0367	-14.2305	-27.387	1.2062	1.2064	1.47675	-41.349	1.4241	1.4119	-10.74	-30.609	1.6534	1.6352	-15.4388	-34.5023
		16.8667		0.3661	0.3624	-3.35625	-6.981	0.396	0.395	-2.685	-8.592	0.4428	0.4437	-8.45775	-6.84675	0.5512	0.5447	-2.01375	-14.2305	0.5921	0.5807	-3.759	-20.8087	0.6682	0.6652	-14.2305	-14.0962	0.9223	0.9024	-18.9292	-28.0583	1.0655	1.0421	-13.6935	-20.1375	1.2082	1.2088	4.16175	-38.127	1.4241	1.412	-10.74	-30.4748	1.654	1.6399	-14.6333	-28.1925
		16.9333		0.3642	0.3621	-5.907	-7.38375	0.3941	0.3975	-5.23575	-5.23575	0.4427	0.4448	-8.592	-5.37	0.5512	0.5422	-2.01375	-17.5867	0.5914	0.581	-4.69875	-20.406	0.6721	0.663	-8.99475	-17.0497	0.9196	0.902	-22.554	-28.5953	1.069	1.0398	-8.99475	-23.2252	1.2059	1.2061	1.074	-41.7518	1.4201	1.4125	-16.11	-29.8035	1.657	1.6356	-10.6058	-33.9653
		17		0.3657	0.36	-3.89325	-10.203	0.3948	0.3952	-4.296	-8.3235	0.4459	0.4409	-4.296	-10.6057	0.5492	0.5427	-4.69875	-16.9155	0.5921	0.5812	-3.759	-20.1375	0.6669	0.6635	-15.9757	-16.3785	0.9191	0.8999	-23.2252	-31.4145	1.0655	1.0428	-13.6935	-19.1977	1.2047	1.2098	-0.537	-36.7845	1.4192	1.4156	-17.3182	-25.6418	1.6505	1.6466	-19.332	-19.1978
		17.0667		0.3654	0.3609	-4.296	-8.99475	0.3933	0.3951	-6.30975	-8.45775	0.4435	0.4402	-7.518	-11.5455	0.5487	0.5437	-5.37	-15.573	0.592	0.5813	-3.89325	-20.0032	0.6699	0.6649	-11.9482	-14.499	0.9225	0.8979	-18.6608	-34.0995	1.068	1.041	-10.3373	-21.6142	1.2122	1.2109	9.53175	-35.3077	1.4227	1.4142	-12.6195	-27.5213	1.6552	1.647	-13.0222	-18.6608
		17.1333		0.3661	0.3634	-3.35625	-5.6385	0.3922	0.3952	-7.7865	-8.3235	0.4436	0.4408	-7.38375	-10.74	0.5497	0.5436	-4.0275	-15.7073	0.5893	0.5824	-7.518	-18.5265	0.673	0.6613	-7.7865	-19.332	0.9198	0.8986	-22.2855	-33.1598	1.066	1.0379	-13.0222	-25.776	1.2059	1.2131	1.074	-32.3542	1.4209	1.4081	-15.036	-35.7105	1.6467	1.6357	-24.4335	-33.831
		17.2		0.3653	0.3632	-4.43025	-5.907	0.3943	0.3979	-4.96725	-4.69875	0.4471	0.442	-2.685	-9.129	0.5481	0.5458	-6.1755	-12.7538	0.5904	0.582	-6.04125	-19.0635	0.6703	0.6671	-11.4112	-11.5455	0.9179	0.9023	-24.8362	-28.1925	1.0692	1.0403	-8.72625	-22.554	1.2033	1.2102	-2.4165	-36.2475	1.4277	1.4093	-5.907	-34.0995	1.645	1.6472	-26.7158	-18.3923
		17.2667		0.3654	0.3615	-4.296	-8.18925	0.3926	0.3985	-7.2495	-3.89325	0.458	0.4387	11.9482	-13.5592	0.5485	0.5429	-5.6385	-16.647	0.5885	0.5804	-8.592	-21.2115	0.6724	0.669	-8.592	-8.99475	0.915	0.8942	-28.7295	-39.0667	1.0686	1.0393	-9.53175	-23.8965	1.2041	1.2046	-1.3425	-43.7655	1.4206	1.4134	-15.4387	-28.5953	1.6533	1.6365	-15.573	-32.757
		17.3333		0.3647	0.3592	-5.23575	-11.277	0.3908	0.3955	-9.666	-7.92075	0.4471	0.4402	-2.685	-11.5455	0.5485	0.5447	-5.6385	-14.2305	0.5931	0.5823	-2.4165	-18.6607	0.676	0.668	-3.759	-10.3372	0.9202	0.8978	-21.7485	-34.2337	1.0697	1.0401	-8.055	-22.8225	1.2072	1.2084	2.81925	-38.664	1.4162	1.4112	-21.3458	-31.5488	1.6472	1.6464	-23.7623	-19.4662
		17.4		0.3663	0.3598	-3.08775	-10.4715	0.3937	0.3967	-5.77275	-6.30975	0.4409	0.441	-11.0085	-10.4715	0.5478	0.5434	-6.57825	-15.9758	0.589	0.5805	-7.92075	-21.0772	0.674	0.6675	-6.444	-11.0085	0.9285	0.898	-10.6057	-33.9652	1.0674	1.0413	-11.1428	-21.2115	1.2006	1.2128	-6.04125	-32.757	1.4198	1.4149	-16.5127	-26.5815	1.6553	1.6377	-12.888	-31.146
		17.4667		0.3656	0.3597	-4.0275	-10.6057	0.392	0.3958	-8.055	-7.518	0.4415	0.4403	-10.203	-11.4112	0.5502	0.5456	-3.35625	-13.0222	0.5912	0.5825	-4.96725	-18.3922	0.6749	0.6661	-5.23575	-12.888	0.9203	0.898	-21.6143	-33.9652	1.068	1.0368	-10.3373	-27.2527	1.2065	1.2083	1.8795	-38.7983	1.4233	1.4126	-11.814	-29.6692	1.6516	1.6323	-17.8553	-38.3955
		17.5333		0.3649	0.3604	-4.96725	-9.666	0.3946	0.3928	-4.5645	-11.5455	0.4448	0.4431	-5.77275	-7.65225	0.5481	0.5424	-6.1755	-17.3183	0.5901	0.5825	-6.444	-18.3922	0.6734	0.6589	-7.2495	-22.554	0.9227	0.9006	-18.3923	-30.4748	1.0644	1.0402	-15.1702	-22.6882	1.2064	1.2092	1.74525	-37.59	1.4151	1.4109	-22.8225	-31.9515	1.6487	1.6363	-21.7485	-33.0255
		17.6		0.3665	0.3628	-2.81925	-6.444	0.394	0.3985	-5.37	-3.89325	0.4419	0.4412	-9.666	-10.203	0.5489	0.5435	-5.1015	-15.8415	0.5912	0.5828	-4.96725	-17.9895	0.6718	0.6641	-9.3975	-15.573	0.9281	0.8977	-11.1427	-34.368	1.0636	1.0381	-16.2442	-25.5075	1.2063	1.2046	1.611	-43.7655	1.4174	1.416	-19.7347	-25.1048	1.6511	1.6447	-18.5265	-21.7485
		17.6667		0.3662	0.3628	-3.222	-6.444	0.3954	0.3977	-3.4905	-4.96725	0.4458	0.4433	-4.43025	-7.38375	0.55	0.5452	-3.62475	-13.5593	0.5901	0.581	-6.444	-20.406	0.6683	0.6627	-14.0963	-17.4525	0.9199	0.8998	-22.1512	-31.5487	1.0631	1.0383	-16.9155	-25.239	1.2084	1.2093	4.43025	-37.4558	1.4232	1.4129	-11.9482	-29.2665	1.6487	1.6374	-21.7485	-31.5488
		17.7333		0.366	0.3624	-3.4905	-6.981	0.3931	0.395	-6.57825	-8.592	0.442	0.4406	-9.53175	-11.0085	0.5469	0.5445	-7.7865	-14.499	0.59	0.5787	-6.57825	-23.4937	0.6715	0.6595	-9.80025	-21.7485	0.9179	0.9012	-24.8362	-29.6692	1.0645	1.0411	-15.036	-21.48	1.2027	1.206	-3.222	-41.886	1.4157	1.4102	-22.017	-32.8913	1.6463	1.638	-24.9705	-30.7433
		17.8		0.3651	0.3622	-4.69875	-7.2495	0.392	0.3936	-8.055	-10.4715	0.4451	0.442	-5.37	-9.129	0.5491	0.5418	-4.833	-18.1238	0.5921	0.581	-3.759	-20.406	0.6703	0.6671	-11.4112	-11.5455	0.9231	0.9021	-17.8552	-28.461	1.0624	1.0392	-17.8552	-24.0308	1.2024	1.2037	-3.62475	-44.9737	1.4186	1.4108	-18.1237	-32.0858	1.6527	1.6326	-16.3785	-37.9927
		17.8667		0.3654	0.3618	-4.296	-7.7865	0.3948	0.395	-4.296	-8.592	0.4435	0.4417	-7.518	-9.53175	0.5495	0.5441	-4.296	-15.036	0.5906	0.5813	-5.77275	-20.0032	0.6728	0.6645	-8.055	-15.036	0.9173	0.8973	-25.6418	-34.905	1.067	1.0346	-11.6798	-30.2062	1.2073	1.2087	2.9535	-38.2613	1.4196	1.4052	-16.7812	-39.6038	1.6613	1.6415	-4.833	-26.0445
		17.9333		0.3654	0.361	-4.296	-8.8605	0.3936	0.3949	-5.907	-8.72625	0.4434	0.4412	-7.65225	-10.203	0.5467	0.5466	-8.055	-11.6798	0.5903	0.5819	-6.1755	-19.1977	0.6696	0.6638	-12.351	-15.9757	0.9168	0.8993	-26.313	-32.22	1.0642	1.0377	-15.4388	-26.0445	1.2039	1.2077	-1.611	-39.6037	1.4208	1.4132	-15.1702	-28.8638	1.6531	1.6312	-15.8415	-39.8723
		18		0.3664	0.3619	-2.9535	-7.65225	0.3946	0.3948	-4.5645	-8.8605	0.4428	0.4391	-8.45775	-13.0222	0.5496	0.5426	-4.16175	-17.0498	0.5894	0.5794	-7.38375	-22.554	0.6737	0.6649	-6.84675	-14.499	0.9187	0.8974	-23.7622	-34.7708	1.0619	1.0358	-18.5265	-28.5952	1.206	1.2072	1.20825	-40.275	1.4211	1.406	-14.7675	-38.5298	1.6519	1.6415	-17.4525	-26.0445
		18.0667		0.3688	0.36	0.2685	-10.203	0.3924	0.3968	-7.518	-6.1755	0.445	0.4419	-5.50425	-9.26325	0.5494	0.5442	-4.43025	-14.9017	0.5884	0.5801	-8.72625	-21.6142	0.6747	0.6653	-5.50425	-13.962	0.9176	0.8971	-25.239	-35.1735	1.0633	1.0444	-16.647	-17.0497	1.2048	1.2102	-0.40275	-36.2475	1.4205	1.4134	-15.573	-28.5953	1.6508	1.6377	-18.9293	-31.146
		18.1333		0.3664	0.3596	-2.9535	-10.74	0.3931	0.3937	-6.57825	-10.3373	0.4444	0.4395	-6.30975	-12.4852	0.5511	0.5434	-2.148	-15.9758	0.5898	0.5833	-6.84675	-17.3182	0.6719	0.6648	-9.26325	-14.6332	0.9222	0.9032	-19.0635	-26.9842	1.062	1.0359	-18.3922	-28.461	1.2083	1.2086	4.296	-38.3955	1.4197	1.4096	-16.647	-33.6968	1.6531	1.6376	-15.8415	-31.2803
		18.2		0.3675	0.3595	-1.47675	-10.8742	0.3926	0.396	-7.2495	-7.2495	0.4432	0.44	-7.92075	-11.814	0.5496	0.5418	-4.16175	-18.1238	0.5908	0.5806	-5.50425	-20.943	0.6728	0.6623	-8.055	-17.9895	0.9226	0.8987	-18.5265	-33.0255	1.0622	1.0394	-18.1237	-23.7622	1.2034	1.2115	-2.28225	-34.5023	1.4201	1.4088	-16.11	-34.7708	1.6499	1.6427	-20.1375	-24.4335
		18.2667		0.3641	0.3597	-6.04125	-10.6057	0.3952	0.395	-3.759	-8.592	0.4415	0.4398	-10.203	-12.0825	0.5481	0.5454	-6.1755	-13.2908	0.5907	0.5817	-5.6385	-19.4662	0.6729	0.6621	-7.92075	-18.258	0.9189	0.8975	-23.4937	-34.6365	1.0625	1.0375	-17.721	-26.313	1.2027	1.2067	-3.222	-40.9462	1.4165	1.4146	-20.943	-26.9842	1.6487	1.6366	-21.7485	-32.6227
		18.3333		0.3675	0.3599	-1.47675	-10.3372	0.3911	0.3952	-9.26325	-8.3235	0.4461	0.4406	-4.0275	-11.0085	0.5489	0.544	-5.1015	-15.1703	0.5918	0.5828	-4.16175	-17.9895	0.6695	0.6656	-12.4852	-13.5592	0.9292	0.8977	-9.666	-34.368	1.0633	1.0369	-16.647	-27.1185	1.2016	1.2135	-4.69875	-31.8173	1.4216	1.4093	-14.0963	-34.0995	1.6487	1.6451	-21.7485	-21.2115
		18.4		0.365	0.3635	-4.833	-5.50425	0.392	0.3962	-8.055	-6.981	0.4638	0.4396	19.7347	-12.351	0.5476	0.5408	-6.84675	-19.4663	0.5889	0.5803	-8.055	-21.3457	0.6733	0.6634	-7.38375	-16.5127	0.9236	0.8971	-17.184	-35.1735	1.0657	1.0374	-13.425	-26.4472	1.206	1.2124	1.20825	-33.294	1.4243	1.4119	-10.4715	-30.609	1.6523	1.6399	-16.9155	-28.1925
		18.4667		0.3643	0.3613	-5.77275	-8.45775	0.3942	0.3935	-5.1015	-10.6057	0.4442	0.439	-6.57825	-13.1565	0.5496	0.5424	-4.16175	-17.3183	0.5904	0.5855	-6.04125	-14.3647	0.6718	0.6615	-9.3975	-19.0635	0.9169	0.8962	-26.1787	-36.3818	1.0658	1.0398	-13.2907	-23.2252	1.2062	1.2078	1.47675	-39.4695	1.4183	1.4124	-18.5265	-29.9378	1.6509	1.6389	-18.795	-29.535
		18.5333		0.3663	0.3613	-3.08775	-8.45775	0.3942	0.3953	-5.1015	-8.18925	0.4446	0.4428	-6.04125	-8.055	0.5469	0.5397	-7.7865	-20.943	0.5895	0.5813	-7.2495	-20.0032	0.6702	0.6651	-11.5455	-14.2305	0.9158	0.9005	-27.6555	-30.609	1.0667	1.0405	-12.0825	-22.2855	1.2079	1.2077	3.759	-39.6037	1.4174	1.4155	-19.7347	-25.776	1.6578	1.6374	-9.53175	-31.5488
		18.6		0.366	0.3618	-3.4905	-7.7865	0.394	0.3962	-5.37	-6.981	0.4431	0.4436	-8.055	-6.981	0.5498	0.541	-3.89325	-19.1978	0.5905	0.5786	-5.907	-23.628	0.6746	0.6597	-5.6385	-21.48	0.9228	0.8955	-18.258	-37.3215	1.0643	1.0384	-15.3045	-25.1047	1.2057	1.2067	0.8055	-40.9462	1.4183	1.4162	-18.5265	-24.8363	1.6542	1.6424	-14.3648	-24.8363
		18.6667		0.3654	0.3615	-4.296	-8.18925	0.3929	0.3955	-6.84675	-7.92075	0.441	0.4417	-10.8743	-9.53175	0.546	0.5448	-8.99475	-14.0963	0.5912	0.5781	-4.96725	-24.2993	0.6699	0.6605	-11.9482	-20.406	0.9165	0.8962	-26.7157	-36.3818	1.0626	1.0355	-17.5868	-28.998	1.1971	1.206	-10.74	-41.886	1.4244	1.4122	-10.3372	-30.2063	1.6468	1.635	-24.2993	-34.7708
		18.7333		0.3638	0.3618	-6.444	-7.7865	0.3924	0.3946	-7.518	-9.129	0.4457	0.4407	-4.5645	-10.8742	0.5479	0.5436	-6.444	-15.7073	0.5898	0.5802	-6.84675	-21.48	0.6687	0.6627	-13.5593	-17.4525	0.9164	0.9031	-26.85	-27.1185	1.0676	1.0417	-10.8742	-20.6745	1.2084	1.2044	4.43025	-44.034	1.4135	1.4082	-24.9705	-35.5763	1.6438	1.6341	-28.3268	-35.979
		18.8		0.3665	0.3598	-2.81925	-10.4715	0.3919	0.3934	-8.18925	-10.74	0.4448	0.4401	-5.77275	-11.6797	0.5493	0.5435	-4.5645	-15.8415	0.5937	0.579	-1.611	-23.091	0.6694	0.6641	-12.6195	-15.573	0.9192	0.8996	-23.091	-31.8173	1.0647	1.0419	-14.7675	-20.406	1.2017	1.2055	-4.5645	-42.5573	1.421	1.4173	-14.9017	-23.3595	1.6495	1.6346	-20.6745	-35.3077
		18.8667		0.3639	0.3624	-6.30975	-6.981	0.3931	0.3945	-6.57825	-9.26325	0.4433	0.4417	-7.7865	-9.53175	0.55	0.5438	-3.62475	-15.4388	0.5918	0.5804	-4.16175	-21.2115	0.671	0.6632	-10.4715	-16.7812	0.9194	0.9014	-22.8225	-29.4008	1.0612	1.0377	-19.4663	-26.0445	1.202	1.2127	-4.16175	-32.8913	1.4184	1.408	-18.3922	-35.8448	1.6543	1.6368	-14.2305	-32.3543
		18.9333		0.3643	0.3619	-5.77275	-7.65225	0.3939	0.3933	-5.50425	-10.8743	0.4403	0.4423	-11.814	-8.72625	0.5486	0.5446	-5.50425	-14.3647	0.5895	0.5801	-7.2495	-21.6142	0.6717	0.6593	-9.53175	-22.017	0.9201	0.8969	-21.8827	-35.442	1.0624	1.0373	-17.8552	-26.5815	1.209	1.2048	5.23575	-43.497	1.4222	1.4127	-13.2908	-29.535	1.6462	1.644	-25.1047	-22.6883
		19		0.3645	0.3601	-5.50425	-10.0688	0.3967	0.3939	-1.74525	-10.0688	0.4447	0.439	-5.907	-13.1565	0.5468	0.5443	-7.92075	-14.7675	0.5896	0.5784	-7.11525	-23.8965	0.6707	0.661	-10.8743	-19.7347	0.9211	0.8939	-20.5403	-39.4695	1.0606	1.0396	-20.2718	-23.4937	1.2057	1.2107	0.8055	-35.5762	1.4172	1.4159	-20.0032	-25.239	1.6511	1.6404	-18.5265	-27.5213
		19.0667		0.3671	0.3615	-2.01375	-8.18925	0.3939	0.3934	-5.50425	-10.74	0.4433	0.4414	-7.7865	-9.9345	0.5466	0.5478	-8.18925	-10.0688	0.5885	0.58	-8.592	-21.7485	0.6678	0.6622	-14.7675	-18.1237	0.9171	0.8993	-25.9102	-32.22	1.0636	1.039	-16.2442	-24.2992	1.2066	1.2064	2.01375	-41.349	1.4243	1.408	-10.4715	-35.8448	1.6463	1.645	-24.9705	-21.3458
		19.1333		0.365	0.3628	-4.833	-6.444	0.3939	0.3936	-5.50425	-10.4715	0.4439	0.4386	-6.981	-13.6935	0.5481	0.5437	-6.1755	-15.573	0.5905	0.5803	-5.907	-21.3457	0.6713	0.6637	-10.0688	-16.11	0.9169	0.8987	-26.1787	-33.0255	1.058	1.0383	-23.7622	-25.239	1.2044	1.208	-0.93975	-39.201	1.4217	1.411	-13.962	-31.8173	1.6553	1.6381	-12.888	-30.609
		19.2		0.3653	0.3618	-4.43025	-7.7865	0.3938	0.3954	-5.6385	-8.055	0.4423	0.4408	-9.129	-10.74	0.5464	0.5425	-8.45775	-17.184	0.5893	0.5795	-7.518	-22.4197	0.6724	0.6664	-8.592	-12.4852	0.9197	0.8962	-22.4198	-36.3818	1.0623	1.0359	-17.9895	-28.461	1.2071	1.2092	2.685	-37.59	1.4182	1.4133	-18.6608	-28.7295	1.6493	1.6372	-20.943	-31.8173
		19.2667		0.3661	0.3604	-3.35625	-9.666	0.3928	0.3964	-6.981	-6.7125	0.443	0.4426	-8.18925	-8.3235	0.5494	0.5425	-4.43025	-17.184	0.5887	0.5803	-8.3235	-21.3457	0.6717	0.6609	-9.53175	-19.869	0.9203	0.9015	-21.6143	-29.2665	1.0659	1.0403	-13.1565	-22.554	1.2042	1.2075	-1.20825	-39.8722	1.4228	1.4141	-12.4852	-27.6555	1.6443	1.64	-27.6555	-28.0583
		19.3333		0.3662	0.3639	-3.222	-4.96725	0.3924	0.394	-7.518	-9.9345	0.4413	0.4392	-10.4715	-12.888	0.5518	0.5452	-1.20825	-13.5593	0.5886	0.5799	-8.45775	-21.8827	0.67	0.6617	-11.814	-18.795	0.916	0.904	-27.387	-25.9102	1.0649	1.0345	-14.499	-30.3405	1.2095	1.2117	5.907	-34.2337	1.4261	1.4143	-8.055	-27.387	1.6487	1.6382	-21.7485	-30.4748
		19.4		0.3672	0.3625	-1.8795	-6.84675	0.3936	0.3956	-5.907	-7.7865	0.4434	0.4411	-7.65225	-10.3372	0.5529	0.5438	0.2685	-15.4388	0.5905	0.5816	-5.907	-19.6005	0.6688	0.6656	-13.425	-13.5592	0.9223	0.8959	-18.9292	-36.7845	1.0569	1.0374	-25.239	-26.4472	1.2057	1.2006	0.8055	-49.1355	1.4207	1.4093	-15.3045	-34.0995	1.6466	1.6297	-24.5678	-41.886
		19.4667		0.3659	0.3599	-3.62475	-10.3372	0.3936	0.3948	-5.907	-8.8605	0.4409	0.4432	-11.0085	-7.518	0.5488	0.5436	-5.23575	-15.7073	0.59	0.5797	-6.57825	-22.1512	0.6703	0.6605	-11.4112	-20.406	0.9195	0.8954	-22.6882	-37.4558	1.0656	1.0363	-13.5592	-27.924	1.2032	1.204	-2.55075	-44.571	1.4234	1.4118	-11.6797	-30.7433	1.6506	1.6386	-19.1977	-29.9378
		19.5333		0.3648	0.3605	-5.1015	-9.53175	0.3942	0.3935	-5.1015	-10.6057	0.4445	0.4431	-6.1755	-7.65225	0.5481	0.5405	-6.1755	-19.869	0.5896	0.5788	-7.11525	-23.3595	0.6714	0.6607	-9.9345	-20.1375	0.913	0.8998	-31.4145	-31.5487	1.0633	1.0365	-16.647	-27.6555	1.2013	1.2074	-5.1015	-40.0065	1.4187	1.4088	-17.9895	-34.7708	1.6484	1.6396	-22.1512	-28.5953
		19.6		0.3638	0.3593	-6.444	-11.1427	0.3927	0.3944	-7.11525	-9.3975	0.443	0.4388	-8.18925	-13.425	0.5468	0.5423	-7.92075	-17.4525	0.5913	0.5802	-4.833	-21.48	0.67	0.6626	-11.814	-17.5867	0.9199	0.8956	-22.1512	-37.1873	1.0622	1.0341	-18.1237	-30.8775	1.204	1.2083	-1.47675	-38.7983	1.4206	1.4154	-15.4387	-25.9103	1.6571	1.6316	-10.4715	-39.3353
		19.6667		0.3654	0.3627	-4.296	-6.57825	0.3933	0.3944	-6.30975	-9.3975	0.4434	0.4388	-7.65225	-13.425	0.5486	0.5421	-5.50425	-17.721	0.5904	0.5793	-6.04125	-22.6882	0.669	0.6582	-13.1565	-23.4937	0.9188	0.8999	-23.628	-31.4145	1.0631	1.0367	-16.9155	-27.387	1.2096	1.2058	6.04125	-42.1545	1.42	1.4114	-16.2442	-31.2803	1.6484	1.6311	-22.1512	-40.0065
		19.7333		0.3656	0.3574	-4.0275	-13.6935	0.3922	0.3937	-7.7865	-10.3373	0.4438	0.4386	-7.11525	-13.6935	0.5469	0.5402	-7.7865	-20.2717	0.5903	0.5775	-6.1755	-25.1047	0.6696	0.6593	-12.351	-22.017	0.9155	0.9054	-28.0583	-24.0308	1.0656	1.0372	-13.5592	-26.7158	1.206	1.2087	1.20825	-38.2613	1.4149	1.4092	-23.091	-34.2338	1.6522	1.6298	-17.0498	-41.7518
		19.8		0.3659	0.3599	-3.62475	-10.3372	0.3921	0.3955	-7.92075	-7.92075	0.4445	0.4395	-6.1755	-12.4852	0.5522	0.5407	-0.67125	-19.6005	0.5904	0.5805	-6.04125	-21.0772	0.6689	0.6589	-13.2907	-22.554	0.92	0.8947	-22.017	-38.3955	1.0646	1.034	-14.9017	-31.0117	1.2002	1.2089	-6.57825	-37.9927	1.4175	1.4128	-19.6005	-29.4008	1.6456	1.6333	-25.9103	-37.053
		19.8667		0.3651	0.3623	-4.69875	-7.11525	0.396	0.3933	-2.685	-10.8743	0.4405	0.4393	-11.5455	-12.7537	0.5497	0.5412	-4.0275	-18.9293	0.5888	0.581	-8.18925	-20.406	0.6701	0.6616	-11.6797	-18.9293	0.9224	0.8957	-18.795	-37.053	1.0648	1.0381	-14.6333	-25.5075	1.207	1.2111	2.55075	-35.0392	1.4191	1.4091	-17.4525	-34.368	1.6538	1.6289	-14.9018	-42.96
		19.9333		0.364	0.3608	-6.1755	-9.129	0.3948	0.3926	-4.296	-11.814	0.442	0.4422	-9.53175	-8.8605	0.5458	0.5421	-9.26325	-17.721	0.5901	0.5783	-6.444	-24.0307	0.6702	0.6632	-11.5455	-16.7812	0.9143	0.8945	-29.6692	-38.664	1.0632	1.0399	-16.7813	-23.091	1.2061	1.207	1.3425	-40.5435	1.4231	1.4152	-12.0825	-26.1788	1.6522	1.6404	-17.0498	-27.5213
		20		0.3649	0.3598	-4.96725	-10.4715	0.393	0.3943	-6.7125	-9.53175	0.4419	0.4399	-9.666	-11.9482	0.5487	0.5424	-5.37	-17.3183	0.5906	0.5797	-5.77275	-22.1512	0.669	0.6622	-13.1565	-18.1237	0.9187	0.8964	-23.7622	-36.1133	1.0573	1.042	-24.702	-20.2717	1.2058	1.2063	0.93975	-41.4832	1.4206	1.4074	-15.4387	-36.6503	1.6512	1.6403	-18.3922	-27.6555
		20.0667		0.3671	0.3612	-2.01375	-8.592	0.3952	0.3953	-3.759	-8.18925	0.4415	0.4427	-10.203	-8.18925	0.5466	0.542	-8.18925	-17.8553	0.5935	0.5789	-1.8795	-23.2252	0.6705	0.6616	-11.1427	-18.9293	0.9184	0.8987	-24.165	-33.0255	1.0615	1.0336	-19.0635	-31.5487	1.209	1.2032	5.23575	-45.645	1.418	1.4082	-18.9292	-35.5763	1.6502	1.6435	-19.7348	-23.3595
		20.1333		0.3654	0.3642	-4.296	-4.5645	0.3933	0.3926	-6.30975	-11.814	0.446	0.4388	-4.16175	-13.425	0.5474	0.5459	-7.11525	-12.6195	0.5906	0.5772	-5.77275	-25.5075	0.6696	0.6598	-12.351	-21.3457	0.9168	0.8958	-26.313	-36.9187	1.0684	1.0372	-9.80025	-26.7158	1.2043	1.2052	-1.074	-42.96	1.4151	1.4102	-22.8225	-32.8913	1.6472	1.625	-23.7623	-48.1958
		20.2		0.3642	0.3623	-5.907	-7.11525	0.3936	0.3929	-5.907	-11.4112	0.4426	0.4394	-8.72625	-12.6195	0.5462	0.5431	-8.72625	-16.3785	0.5883	0.5806	-8.8605	-20.943	0.6701	0.6574	-11.6797	-24.5677	0.9175	0.8997	-25.3732	-31.683	1.063	1.0361	-17.0497	-28.1925	1.2033	1.2098	-2.4165	-36.7845	1.4219	1.4127	-13.6935	-29.535	1.6522	1.6332	-17.0498	-37.1873
		20.2667		0.3656	0.3633	-4.0275	-5.77275	0.3928	0.3925	-6.981	-11.9483	0.4419	0.4395	-9.666	-12.4852	0.5473	0.5414	-7.2495	-18.6608	0.5896	0.5786	-7.11525	-23.628	0.6718	0.6579	-9.3975	-23.8965	0.9235	0.8984	-17.3183	-33.4282	1.0595	1.0426	-21.7485	-19.4662	1.2034	1.2117	-2.28225	-34.2337	1.4248	1.4155	-9.80025	-25.776	1.6448	1.6346	-26.9843	-35.3077
		20.3333		0.3639	0.3618	-6.30975	-7.7865	0.3946	0.3946	-4.5645	-9.129	0.4476	0.4385	-2.01375	-13.8277	0.5468	0.5406	-7.92075	-19.7347	0.5874	0.5782	-10.0688	-24.165	0.6697	0.6621	-12.2168	-18.258	0.921	0.9004	-20.6745	-30.7432	1.0619	1.0356	-18.5265	-28.8637	1.2025	1.2046	-3.4905	-43.7655	1.4202	1.413	-15.9758	-29.1323	1.6535	1.6456	-15.3045	-20.5403
		20.4		0.3648	0.3585	-5.1015	-12.2167	0.3931	0.3951	-6.57825	-8.45775	0.4429	0.4383	-8.3235	-14.0962	0.5506	0.5417	-2.81925	-18.258	0.5889	0.5801	-8.055	-21.6142	0.6669	0.6664	-15.9757	-12.4852	0.9219	0.8933	-19.4662	-40.275	1.0679	1.0341	-10.4715	-30.8775	1.2052	1.2047	0.13425	-43.6312	1.4226	1.4154	-12.7537	-25.9103	1.6489	1.6359	-21.48	-33.5625
		20.4667		0.365	0.3607	-4.833	-9.26325	0.3931	0.3953	-6.57825	-8.18925	0.4416	0.4384	-10.0688	-13.962	0.5478	0.543	-6.57825	-16.5128	0.5935	0.5791	-1.8795	-22.9568	0.6694	0.667	-12.6195	-11.6797	0.9189	0.8938	-23.4937	-39.6037	1.064	1.0364	-15.7072	-27.7897	1.2012	1.2068	-5.23575	-40.812	1.4124	1.4144	-26.4472	-27.2528	1.6434	1.6295	-28.8638	-42.1545
		20.5333		0.3642	0.3611	-5.907	-8.72625	0.3917	0.3959	-8.45775	-7.38375	0.4442	0.4398	-6.57825	-12.0825	0.5485	0.5423	-5.6385	-17.4525	0.5895	0.5809	-7.2495	-20.5402	0.6714	0.6631	-9.9345	-16.9155	0.915	0.895	-28.7295	-37.9927	1.0647	1.0386	-14.7675	-24.8363	1.2055	1.2049	0.537	-43.3627	1.4237	1.4118	-11.277	-30.7433	1.6551	1.6363	-13.1565	-33.0255
		20.6		0.365	0.3599	-4.833	-10.3372	0.3934	0.3918	-6.1755	-12.888	0.444	0.4373	-6.84675	-15.4387	0.5461	0.5423	-8.8605	-17.4525	0.5883	0.5803	-8.8605	-21.3457	0.6724	0.6613	-8.592	-19.332	0.9221	0.8977	-19.1977	-34.368	1.0654	1.0345	-13.8278	-30.3405	1.2027	1.2051	-3.222	-43.0942	1.4179	1.4083	-19.0635	-35.442	1.6554	1.6307	-12.7537	-40.5435
		20.6667		0.3662	0.3621	-3.222	-7.38375	0.3926	0.3949	-7.2495	-8.72625	0.4429	0.4377	-8.3235	-14.9017	0.5471	0.5404	-7.518	-20.0033	0.5896	0.5808	-7.11525	-20.6745	0.6696	0.6609	-12.351	-19.869	0.9206	0.8921	-21.2115	-41.886	1.0648	1.0347	-14.6333	-30.072	1.205	1.2016	-0.13425	-47.793	1.4157	1.407	-22.017	-37.1873	1.6401	1.629	-33.294	-42.8258
		20.7333		0.3647	0.3626	-5.23575	-6.7125	0.3926	0.3933	-7.2495	-10.8743	0.4445	0.4395	-6.1755	-12.4852	0.5472	0.5431	-7.38375	-16.3785	0.5883	0.5791	-8.8605	-22.9568	0.6711	0.6624	-10.3372	-17.8552	0.922	0.8978	-19.332	-34.2337	1.0646	1.0347	-14.9017	-30.072	1.2022	1.2052	-3.89325	-42.96	1.4172	1.4119	-20.0032	-30.609	1.6419	1.6451	-30.8775	-21.2115
		20.8		0.3657	0.3603	-3.89325	-9.80025	0.3926	0.395	-7.2495	-8.592	0.4438	0.4376	-7.11525	-15.036	0.5502	0.5424	-3.35625	-17.3183	0.5903	0.5798	-6.1755	-22.017	0.6694	0.6584	-12.6195	-23.2252	0.928	0.8988	-11.277	-32.8912	1.0633	1.0387	-16.647	-24.702	1.2041	1.2068	-1.3425	-40.812	1.4192	1.4129	-17.3182	-29.2665	1.6436	1.6399	-28.5953	-28.1925
		20.8667		0.3685	0.3586	-0.13425	-12.0825	0.3963	0.3931	-2.28225	-11.1427	0.4446	0.438	-6.04125	-14.499	0.5477	0.5423	-6.7125	-17.4525	0.5887	0.5797	-8.3235	-22.1512	0.6715	0.6629	-9.80025	-17.184	0.9162	0.8934	-27.1185	-40.1408	1.0633	1.0376	-16.647	-26.1787	1.2006	1.2046	-6.04125	-43.7655	1.4242	1.411	-10.6058	-31.8173	1.6535	1.642	-15.3045	-25.3733
		20.9333		0.3671	0.363	-2.01375	-6.1755	0.3949	0.3946	-4.16175	-9.129	0.4438	0.4391	-7.11525	-13.0222	0.5477	0.5409	-6.7125	-19.332	0.5891	0.5799	-7.7865	-21.8827	0.672	0.668	-9.129	-10.3372	0.9175	0.8946	-25.3732	-38.5298	1.0661	1.0401	-12.888	-22.8225	1.2082	1.2073	4.16175	-40.1408	1.4177	1.4089	-19.332	-34.6365	1.6505	1.6364	-19.332	-32.8913
		21		0.3632	0.3592	-7.2495	-11.277	0.3941	0.3951	-5.23575	-8.45775	0.4421	0.4422	-9.3975	-8.8605	0.5448	0.5436	-10.6057	-15.7073	0.5915	0.5782	-4.5645	-24.165	0.6711	0.6633	-10.3372	-16.647	0.9136	0.8924	-30.609	-41.4832	1.0678	1.0398	-10.6057	-23.2252	1.201	1.2061	-5.50425	-41.7518	1.4191	1.4067	-17.4525	-37.59	1.6461	1.6344	-25.239	-35.5763
		21.0667		0.3638	0.3603	-6.444	-9.80025	0.3928	0.3925	-6.981	-11.9483	0.4437	0.439	-7.2495	-13.1565	0.5476	0.5411	-6.84675	-19.0635	0.5889	0.5793	-8.055	-22.6882	0.6723	0.6643	-8.72625	-15.3045	0.9197	0.893	-22.4198	-40.6778	1.0687	1.0344	-9.3975	-30.4747	1.208	1.2046	3.89325	-43.7655	1.4175	1.4104	-19.6005	-32.6227	1.6511	1.6387	-18.5265	-29.8035
		21.1333		0.3655	0.3612	-4.16175	-8.592	0.392	0.3946	-8.055	-9.129	0.4441	0.4399	-6.7125	-11.9482	0.546	0.5421	-8.99475	-17.721	0.5905	0.58	-5.907	-21.7485	0.6713	0.6596	-10.0688	-21.6142	0.9231	0.8977	-17.8552	-34.368	1.0627	1.0313	-17.4525	-34.6365	1.2075	1.2088	3.222	-38.127	1.4253	1.4127	-9.129	-29.535	1.6498	1.6423	-20.2718	-24.9705
		21.2		0.3636	0.3601	-6.7125	-10.0688	0.3913	0.3928	-8.99475	-11.5455	0.4423	0.4409	-9.129	-10.6057	0.5493	0.5419	-4.5645	-17.9895	0.5888	0.579	-8.18925	-23.091	0.6691	0.6601	-13.0222	-20.943	0.917	0.894	-26.0445	-39.3353	1.0628	1.0349	-17.3183	-29.8035	1.2035	1.2005	-2.148	-49.2697	1.4234	1.4081	-11.6797	-35.7105	1.6433	1.6382	-28.998	-30.4748
		21.2667		0.364	0.3595	-6.1755	-10.8742	0.3929	0.393	-6.84675	-11.277	0.4437	0.4389	-7.2495	-13.2907	0.5499	0.5382	-3.759	-22.9567	0.5915	0.5804	-4.5645	-21.2115	0.6724	0.6581	-8.592	-23.628	0.9199	0.8952	-22.1512	-37.7242	1.0633	1.0333	-16.647	-31.9515	1.2036	1.2099	-2.01375	-36.6503	1.4187	1.4034	-17.9895	-42.0203	1.6451	1.6412	-26.5815	-26.4473
		21.3333		0.3646	0.3621	-5.37	-7.38375	0.3913	0.395	-8.99475	-8.592	0.4449	0.4395	-5.6385	-12.4852	0.5512	0.5438	-2.01375	-15.4388	0.5891	0.5791	-7.7865	-22.9568	0.6695	0.6604	-12.4852	-20.5402	0.9157	0.8951	-27.7898	-37.8585	1.0677	1.0378	-10.74	-25.9102	1.2011	1.197	-5.37	-53.9685	1.423	1.4084	-12.2167	-35.3077	1.6407	1.6359	-32.4885	-33.5625
		21.4		0.366	0.3611	-3.4905	-8.72625	0.3917	0.3946	-8.45775	-9.129	0.4436	0.4375	-7.38375	-15.1702	0.5489	0.5408	-5.1015	-19.4663	0.5883	0.5793	-8.8605	-22.6882	0.6688	0.6628	-13.425	-17.3182	0.9183	0.8916	-24.2993	-42.5573	1.0612	1.0332	-19.4663	-32.0858	1.2041	1.2058	-1.3425	-42.1545	1.419	1.4128	-17.5867	-29.4008	1.6504	1.6363	-19.4662	-33.0255
		21.4667		0.3649	0.3594	-4.96725	-11.0085	0.391	0.3929	-9.3975	-11.4112	0.4431	0.4379	-8.055	-14.6332	0.5466	0.544	-8.18925	-15.1703	0.5891	0.5784	-7.7865	-23.8965	0.6721	0.6594	-8.99475	-21.8827	0.9221	0.8943	-19.1977	-38.9325	1.0638	1.0338	-15.9757	-31.2802	1.205	1.2083	-0.13425	-38.7983	1.4186	1.4016	-18.1237	-44.4368	1.6498	1.6345	-20.2718	-35.442
		21.5333		0.3652	0.3588	-4.5645	-11.814	0.3922	0.3916	-7.7865	-13.1565	0.4439	0.4371	-6.981	-15.7072	0.5487	0.5402	-5.37	-20.2717	0.5919	0.5763	-4.0275	-26.7157	0.6682	0.6615	-14.2305	-19.0635	0.9213	0.8942	-20.2718	-39.0667	1.0626	1.0368	-17.5868	-27.2527	1.1995	1.2062	-7.518	-41.6175	1.4187	1.4106	-17.9895	-32.3543	1.6517	1.6323	-17.721	-38.3955
		21.6		0.3645	0.36	-5.50425	-10.203	0.3921	0.3935	-7.92075	-10.6057	0.4443	0.438	-6.444	-14.499	0.547	0.5397	-7.65225	-20.943	0.5899	0.5774	-6.7125	-25.239	0.6693	0.6625	-12.7538	-17.721	0.9197	0.8941	-22.4198	-39.201	1.063	1.0365	-17.0497	-27.6555	1.1978	1.2088	-9.80025	-38.127	1.4165	1.4079	-20.943	-35.979	1.642	1.6316	-30.7432	-39.3353
		21.6667		0.363	0.3606	-7.518	-9.3975	0.3926	0.3943	-7.2495	-9.53175	0.4433	0.4383	-7.7865	-14.0962	0.5484	0.5404	-5.77275	-20.0033	0.5906	0.5771	-5.77275	-25.6418	0.672	0.6618	-9.129	-18.6607	0.9163	0.8982	-26.9842	-33.6967	1.0652	1.0374	-14.0963	-26.4472	1.2021	1.2067	-4.0275	-40.9462	1.4144	1.408	-23.7622	-35.8448	1.646	1.6245	-25.3733	-48.867
		21.7333		0.3651	0.3587	-4.69875	-11.9482	0.3934	0.393	-6.1755	-11.277	0.4424	0.4378	-8.99475	-14.7675	0.5484	0.5424	-5.77275	-17.3183	0.5892	0.5773	-7.65225	-25.3732	0.6682	0.6669	-14.2305	-11.814	0.916	0.8982	-27.387	-33.6967	1.0637	1.0356	-16.11	-28.8637	1.2014	1.2053	-4.96725	-42.8257	1.4224	1.408	-13.0222	-35.8448	1.6473	1.6364	-23.628	-32.8913
		21.8		0.3652	0.3601	-4.5645	-10.0688	0.3956	0.394	-3.222	-9.9345	0.4428	0.4383	-8.45775	-14.0962	0.5485	0.5432	-5.6385	-16.2442	0.588	0.5769	-9.26325	-25.9102	0.6693	0.663	-12.7538	-17.0497	0.9237	0.8935	-17.0498	-40.0065	1.0613	1.035	-19.332	-29.6692	1.2076	1.2079	3.35625	-39.3353	1.4196	1.4081	-16.7812	-35.7105	1.646	1.6312	-25.3733	-39.8723
		21.8667		0.3671	0.3599	-2.01375	-10.3372	0.3922	0.3927	-7.7865	-11.6798	0.4421	0.4385	-9.3975	-13.8277	0.548	0.5434	-6.30975	-15.9758	0.5886	0.5798	-8.45775	-22.017	0.6709	0.6608	-10.6057	-20.0032	0.9165	0.8944	-26.7157	-38.7983	1.0624	1.0363	-17.8552	-27.924	1.2043	1.2059	-1.074	-42.0203	1.4157	1.4105	-22.017	-32.4885	1.6577	1.64	-9.666	-28.0583
		21.9333		0.3661	0.3608	-3.35625	-9.129	0.3922	0.3918	-7.7865	-12.888	0.4421	0.438	-9.3975	-14.499	0.548	0.5439	-6.30975	-15.3045	0.5921	0.5771	-3.759	-25.6418	0.6689	0.6619	-13.2907	-18.5265	0.9216	0.8903	-19.869	-44.3025	1.0659	1.031	-13.1565	-35.0392	1.2027	1.2028	-3.222	-46.182	1.4203	1.4105	-15.8415	-32.4885	1.6439	1.6312	-28.1925	-39.8723
		22		0.3651	0.359	-4.69875	-11.5455	0.394	0.3934	-5.37	-10.74	0.445	0.4365	-5.50425	-16.5127	0.548	0.5398	-6.30975	-20.8088	0.5919	0.5765	-4.0275	-26.4472	0.6714	0.6608	-9.9345	-20.0032	0.9212	0.8988	-20.406	-32.8912	1.0635	1.0306	-16.3785	-35.5763	1.1998	1.2103	-7.11525	-36.1133	1.4236	1.4135	-11.4112	-28.461	1.6423	1.6298	-30.3405	-41.7518
		22.0667		0.3648	0.3596	-5.1015	-10.74	0.3946	0.3939	-4.5645	-10.0688	0.4449	0.4384	-5.6385	-13.962	0.548	0.5384	-6.30975	-22.6883	0.5896	0.5795	-7.11525	-22.4197	0.6697	0.6597	-12.2168	-21.48	0.9183	0.8965	-24.2993	-35.979	1.065	1.0349	-14.3647	-29.8035	1.2028	1.2068	-3.08775	-40.812	1.4227	1.4065	-12.6195	-37.8585	1.6534	1.6307	-15.4388	-40.5435
		22.1333		0.3638	0.3579	-6.444	-13.0222	0.395	0.3926	-4.0275	-11.814	0.4439	0.4395	-6.981	-12.4852	0.5472	0.542	-7.38375	-17.8553	0.5898	0.5771	-6.84675	-25.6418	0.6672	0.6636	-15.573	-16.2442	0.9184	0.8931	-24.165	-40.5435	1.0633	1.0355	-16.647	-28.998	1.2041	1.2037	-1.3425	-44.9737	1.4169	1.4119	-20.406	-30.609	1.6527	1.6365	-16.3785	-32.757
		22.2		0.3647	0.3602	-5.23575	-9.9345	0.3904	0.3928	-10.203	-11.5455	0.444	0.4389	-6.84675	-13.2907	0.5532	0.5395	0.67125	-21.2115	0.5879	0.5796	-9.3975	-22.2855	0.6677	0.6598	-14.9018	-21.3457	0.9202	0.8939	-21.7485	-39.4695	1.0614	1.0327	-19.1978	-32.757	1.2023	1.212	-3.759	-33.831	1.4148	1.4083	-23.2252	-35.442	1.656	1.6301	-11.9483	-41.349
		22.2667		0.3649	0.3603	-4.96725	-9.80025	0.3911	0.3921	-9.26325	-12.4852	0.4415	0.4377	-10.203	-14.9017	0.5489	0.5402	-5.1015	-20.2717	0.5912	0.5782	-4.96725	-24.165	0.6737	0.659	-6.84675	-22.4197	0.9168	0.8953	-26.313	-37.59	1.0603	1.0344	-20.6745	-30.4747	1.203	1.2047	-2.81925	-43.6312	1.4178	1.4118	-19.1977	-30.7433	1.6571	1.6333	-10.4715	-37.053
		22.3333		0.3637	0.3588	-6.57825	-11.814	0.3912	0.3935	-9.129	-10.6057	0.443	0.4413	-8.18925	-10.0687	0.549	0.5397	-4.96725	-20.943	0.5879	0.5765	-9.3975	-26.4472	0.6682	0.6551	-14.2305	-27.6555	0.9161	0.8926	-27.2527	-41.2148	1.0591	1.0307	-22.2855	-35.442	1.2022	1.2038	-3.89325	-44.8395	1.4232	1.4066	-11.9482	-37.7242	1.6478	1.6425	-22.9568	-24.702
		22.4		0.3643	0.3586	-5.77275	-12.0825	0.3944	0.3924	-4.833	-12.0825	0.4417	0.4387	-9.9345	-13.5592	0.5484	0.5403	-5.77275	-20.1375	0.5943	0.581	-0.8055	-20.406	0.668	0.6608	-14.499	-20.0032	0.9256	0.8938	-14.499	-39.6037	1.063	1.0323	-17.0497	-33.294	1.2075	1.2087	3.222	-38.2613	1.4128	1.4073	-25.9102	-36.7845	1.6577	1.6356	-9.666	-33.9653
		22.4667		0.364	0.36	-6.1755	-10.203	0.3923	0.3924	-7.65225	-12.0825	0.4428	0.4384	-8.45775	-13.962	0.5468	0.5403	-7.92075	-20.1375	0.589	0.5794	-7.92075	-22.554	0.67	0.6639	-11.814	-15.8415	0.9185	0.8986	-24.0307	-33.1598	1.0608	1.0379	-20.0032	-25.776	1.2067	1.1949	2.148	-56.7877	1.4187	1.4167	-17.9895	-24.165	1.6644	1.636	-0.67125	-33.4283
		22.5333		0.3635	0.3589	-6.84675	-11.6798	0.3933	0.3922	-6.30975	-12.351	0.4423	0.4405	-9.129	-11.1427	0.5464	0.539	-8.45775	-21.8828	0.5894	0.5769	-7.38375	-25.9102	0.6699	0.6638	-11.9482	-15.9757	0.9251	0.8941	-15.1702	-39.201	1.0635	1.0356	-16.3785	-28.8637	1.2036	1.2068	-2.01375	-40.812	1.4191	1.4046	-17.4525	-40.4092	1.6477	1.6347	-23.091	-35.1735
		22.6		0.3637	0.3601	-6.57825	-10.0688	0.3934	0.3915	-6.1755	-13.2908	0.441	0.4382	-10.8743	-14.2305	0.5458	0.5395	-9.26325	-21.2115	0.5883	0.5764	-8.8605	-26.5815	0.6682	0.6582	-14.2305	-23.4937	0.9221	0.8961	-19.1977	-36.516	1.0647	1.0377	-14.7675	-26.0445	1.2032	1.2114	-2.55075	-34.6365	1.4303	1.4167	-2.4165	-24.165	1.6485	1.6393	-22.017	-28.998
		22.6667		0.3633	0.36	-7.11525	-10.203	0.3915	0.3933	-8.72625	-10.8743	0.4422	0.437	-9.26325	-15.8415	0.5474	0.5384	-7.11525	-22.6883	0.5911	0.5756	-5.1015	-27.6555	0.6685	0.6575	-13.8277	-24.4335	0.9148	0.898	-28.998	-33.9652	1.065	1.0297	-14.3647	-36.7845	1.2035	1.1979	-2.148	-52.7603	1.4169	1.4083	-20.406	-35.442	1.6502	1.6257	-19.7348	-47.256
		22.7333		0.3645	0.3599	-5.50425	-10.3372	0.3934	0.3939	-6.1755	-10.0688	0.4421	0.4381	-9.3975	-14.3647	0.549	0.5395	-4.96725	-21.2115	0.5893	0.5768	-7.518	-26.0445	0.6682	0.6559	-14.2305	-26.5815	0.9152	0.8911	-28.461	-43.2285	1.0644	1.0317	-15.1702	-34.0995	1.2011	1.2033	-5.37	-45.5108	1.4196	1.4102	-16.7812	-32.8913	1.6433	1.6316	-28.998	-39.3353
		22.8		0.365	0.3582	-4.833	-12.6195	0.3931	0.3938	-6.57825	-10.203	0.4482	0.4365	-1.20825	-16.5127	0.5473	0.5414	-7.2495	-18.6608	0.5908	0.5753	-5.50425	-28.0582	0.6678	0.6564	-14.7675	-25.9102	0.9152	0.8992	-28.461	-32.3542	1.0639	1.0335	-15.8415	-31.683	1.2073	1.2057	2.9535	-42.2887	1.4193	1.4148	-17.184	-26.7158	1.6421	1.6336	-30.609	-36.6503
		22.8667		0.3661	0.3605	-3.35625	-9.53175	0.3937	0.3929	-5.77275	-11.4112	0.4454	0.4373	-4.96725	-15.4387	0.549	0.5424	-4.96725	-17.3183	0.5918	0.5795	-4.16175	-22.4197	0.6669	0.6597	-15.9757	-21.48	0.9199	0.8892	-22.1512	-45.7793	1.0638	1.0375	-15.9757	-26.313	1.1968	1.2077	-11.1427	-39.6037	1.4231	1.4074	-12.0825	-36.6503	1.6486	1.6327	-21.8827	-37.8585
		22.9333		0.3653	0.3621	-4.43025	-7.38375	0.394	0.3914	-5.37	-13.425	0.4402	0.4374	-11.9483	-15.3045	0.5481	0.5396	-6.1755	-21.0773	0.5889	0.5776	-8.055	-24.9705	0.6675	0.66	-15.1703	-21.0772	0.9158	0.8936	-27.6555	-39.8723	1.0629	1.0337	-17.184	-31.4145	1.2092	1.2031	5.50425	-45.7792	1.4225	1.4102	-12.888	-32.8913	1.6571	1.6362	-10.4715	-33.1598
		23		0.3662	0.3592	-3.222	-11.277	0.3947	0.3932	-4.43025	-11.0085	0.4415	0.4387	-10.203	-13.5592	0.547	0.5397	-7.65225	-20.943	0.5876	0.5764	-9.80025	-26.5815	0.6683	0.6638	-14.0963	-15.9757	0.9125	0.8922	-32.0857	-41.7517	1.0666	1.0321	-12.2168	-33.5625	1.2067	1.2043	2.148	-44.1683	1.4184	1.4099	-18.3922	-33.294	1.6521	1.6343	-17.184	-35.7105
		23.0667		0.3672	0.3608	-1.8795	-9.129	0.3949	0.391	-4.16175	-13.962	0.4415	0.4356	-10.203	-17.721	0.546	0.5409	-8.99475	-19.332	0.5891	0.5789	-7.7865	-23.2252	0.6676	0.6562	-15.036	-26.1787	0.9169	0.8942	-26.1787	-39.0667	1.0616	1.0309	-18.9292	-35.1735	1.2065	1.2088	1.8795	-38.127	1.4146	1.4076	-23.4937	-36.3818	1.6579	1.6412	-9.3975	-26.4473
		23.1333		0.3636	0.3593	-6.7125	-11.1427	0.3935	0.3918	-6.04125	-12.888	0.4421	0.4372	-9.3975	-15.573	0.5507	0.5383	-2.685	-22.8225	0.5878	0.5778	-9.53175	-24.702	0.6717	0.6604	-9.53175	-20.5402	0.9188	0.8922	-23.628	-41.7517	1.0599	1.0364	-21.2115	-27.7897	1.2048	1.199	-0.40275	-51.2835	1.4232	1.4107	-11.9482	-32.22	1.6513	1.6326	-18.258	-37.9927
		23.2		0.3647	0.3611	-5.23575	-8.72625	0.3925	0.3932	-7.38375	-11.0085	0.4439	0.4374	-6.981	-15.3045	0.5468	0.541	-7.92075	-19.1978	0.5903	0.579	-6.1755	-23.091	0.6703	0.657	-11.4112	-25.1047	0.9183	0.889	-24.2993	-46.0477	1.0613	1.0287	-19.332	-38.127	1.205	1.2081	-0.13425	-39.0668	1.4225	1.4048	-12.888	-40.1408	1.644	1.6298	-28.0583	-41.7518
		23.2667		0.3638	0.3599	-6.444	-10.3372	0.392	0.3932	-8.055	-11.0085	0.443	0.4372	-8.18925	-15.573	0.548	0.5383	-6.30975	-22.8225	0.5905	0.5757	-5.907	-27.5212	0.665	0.6641	-18.5265	-15.573	0.9184	0.8899	-24.165	-44.8395	1.0626	1.0365	-17.5868	-27.6555	1.2041	1.2011	-1.3425	-48.4642	1.4156	1.4082	-22.1512	-35.5763	1.6426	1.6344	-29.9378	-35.5763
		23.3333		0.3668	0.3594	-2.4165	-11.0085	0.392	0.3926	-8.055	-11.814	0.4421	0.4387	-9.3975	-13.5592	0.5465	0.5399	-8.3235	-20.6745	0.5887	0.5764	-8.3235	-26.5815	0.6687	0.6613	-13.5593	-19.332	0.9201	0.8916	-21.8827	-42.5573	1.0675	1.0321	-11.0085	-33.5625	1.2035	1.2022	-2.148	-46.9875	1.4166	1.4074	-20.8087	-36.6503	1.6509	1.6327	-18.795	-37.8585
		23.4		0.3625	0.3601	-8.18925	-10.0688	0.394	0.3921	-5.37	-12.4852	0.4412	0.4389	-10.6058	-13.2907	0.5486	0.5397	-5.50425	-20.943	0.588	0.5754	-9.26325	-27.924	0.6678	0.6556	-14.7675	-26.9842	0.9198	0.8876	-22.2855	-47.9273	1.0639	1.034	-15.8415	-31.0117	1.2039	1.2098	-1.611	-36.7845	1.413	1.4039	-25.6417	-41.349	1.648	1.6362	-22.6883	-33.1598
		23.4667		0.3655	0.358	-4.16175	-12.888	0.3945	0.3921	-4.69875	-12.4852	0.4408	0.4401	-11.1428	-11.6797	0.5482	0.5369	-6.04125	-24.702	0.5899	0.5773	-6.7125	-25.3732	0.6667	0.6573	-16.2443	-24.702	0.9121	0.8964	-32.6227	-36.1133	1.0625	1.0309	-17.721	-35.1735	1.2092	1.2096	5.50425	-37.053	1.4155	1.4111	-22.2855	-31.683	1.6577	1.6377	-9.666	-31.146
		23.5333		0.3637	0.358	-6.57825	-12.888	0.3939	0.3924	-5.50425	-12.0825	0.4468	0.4369	-3.08775	-15.9757	0.5501	0.5385	-3.4905	-22.554	0.593	0.5774	-2.55075	-25.239	0.6694	0.6567	-12.6195	-25.5075	0.9188	0.8899	-23.628	-44.8395	1.06	1.0291	-21.0773	-37.59	1.2026	1.2115	-3.35625	-34.5023	1.4192	1.4022	-17.3182	-43.6313	1.6509	1.6316	-18.795	-39.3353
		23.6		0.3652	0.3574	-4.5645	-13.6935	0.3935	0.3926	-6.04125	-11.814	0.4439	0.4394	-6.981	-12.6195	0.5483	0.5393	-5.907	-21.48	0.5913	0.5772	-4.833	-25.5075	0.6683	0.6603	-14.0963	-20.6745	0.9161	0.8914	-27.2527	-42.8257	1.0641	1.0303	-15.573	-35.979	1.2053	1.2051	0.2685	-43.0942	1.4135	1.4048	-24.9705	-40.1408	1.6445	1.6363	-27.387	-33.0255
		23.6667		0.3631	0.3591	-7.38375	-11.4112	0.3934	0.391	-6.1755	-13.962	0.4424	0.4378	-8.99475	-14.7675	0.5467	0.541	-8.055	-19.1978	0.5923	0.5768	-3.4905	-26.0445	0.669	0.6593	-13.1565	-22.017	0.9158	0.8915	-27.6555	-42.6915	1.0666	1.0306	-12.2168	-35.5763	1.206	1.2105	1.20825	-35.8447	1.4165	1.4073	-20.943	-36.7845	1.6526	1.6301	-16.5127	-41.349
		23.7333		0.3653	0.3591	-4.43025	-11.4112	0.3917	0.3917	-8.45775	-13.0222	0.4442	0.437	-6.57825	-15.8415	0.5479	0.5418	-6.444	-18.1238	0.5886	0.5736	-8.45775	-30.3405	0.6715	0.6597	-9.80025	-21.48	0.9177	0.8981	-25.1047	-33.831	1.0653	1.04	-13.962	-22.9567	1.2079	1.2094	3.759	-37.3215	1.4162	1.4068	-21.3458	-37.4558	1.6613	1.6337	-4.833	-36.516
		23.8		0.3624	0.36	-8.3235	-10.203	0.3958	0.392	-2.9535	-12.6195	0.4417	0.4376	-9.9345	-15.036	0.5497	0.5389	-4.0275	-22.017	0.5879	0.5793	-9.3975	-22.6882	0.6685	0.6647	-13.8277	-14.7675	0.917	0.8909	-26.0445	-43.497	1.0649	1.0357	-14.499	-28.7295	1.2034	1.2067	-2.28225	-40.9462	1.4167	1.4085	-20.6745	-35.1735	1.6612	1.6292	-4.96725	-42.5573
		23.8667		0.3637	0.361	-6.57825	-8.8605	0.3941	0.395	-5.23575	-8.592	0.4434	0.4355	-7.65225	-17.8552	0.549	0.5373	-4.96725	-24.165	0.5913	0.577	-4.833	-25.776	0.67	0.6601	-11.814	-20.943	0.9222	0.8911	-19.0635	-43.2285	1.0627	1.0393	-17.4525	-23.8965	1.205	1.2034	-0.13425	-45.3765	1.4189	1.405	-17.721	-39.8723	1.6576	1.6339	-9.80025	-36.2475
		23.9333		0.3647	0.3598	-5.23575	-10.4715	0.3898	0.3911	-11.0085	-13.8277	0.4422	0.4371	-9.26325	-15.7072	0.5487	0.5377	-5.37	-23.628	0.5863	0.579	-11.5455	-23.091	0.6699	0.654	-11.9482	-29.1322	0.915	0.8921	-28.7295	-41.886	1.0605	1.0403	-20.406	-22.554	1.2007	1.2146	-5.907	-30.3405	1.4154	1.4065	-22.4197	-37.8585	1.6537	1.6374	-15.036	-31.5488
		24		0.3647	0.3601	-5.23575	-10.0688	0.3927	0.3926	-7.11525	-11.814	0.442	0.438	-9.53175	-14.499	0.547	0.5396	-7.65225	-21.0773	0.5916	0.5799	-4.43025	-21.8827	0.6704	0.6578	-11.277	-24.0307	0.9133	0.8938	-31.0117	-39.6037	1.0648	1.0312	-14.6333	-34.7708	1.202	1.2098	-4.16175	-36.7845	1.4203	1.4147	-15.8415	-26.85	1.6451	1.6388	-26.5815	-29.6693
		24.0667		0.3662	0.3601	-3.222	-10.0688	0.3946	0.3941	-4.5645	-9.80025	0.4429	0.4365	-8.3235	-16.5127	0.5479	0.5381	-6.444	-23.091	0.5909	0.5794	-5.37	-22.554	0.6661	0.6551	-17.0497	-27.6555	0.9155	0.8926	-28.0583	-41.2148	1.0615	1.0378	-19.0635	-25.9102	1.2012	1.2048	-5.23575	-43.497	1.4145	1.4085	-23.628	-35.1735	1.645	1.6399	-26.7158	-28.1925
		24.1333		0.364	0.3602	-6.1755	-9.9345	0.3951	0.3916	-3.89325	-13.1565	0.4397	0.4362	-12.6195	-16.9155	0.5461	0.5373	-8.8605	-24.165	0.5894	0.5798	-7.38375	-22.017	0.6699	0.655	-11.9482	-27.7897	0.921	0.8909	-20.6745	-43.497	1.063	1.0357	-17.0497	-28.7295	1.2014	1.2061	-4.96725	-41.7518	1.4142	1.4127	-24.0308	-29.535	1.6387	1.6284	-35.1735	-43.6313
		24.2		0.3637	0.3618	-6.57825	-7.7865	0.3927	0.3925	-7.11525	-11.9483	0.4426	0.4378	-8.72625	-14.7675	0.5485	0.5407	-5.6385	-19.6005	0.5888	0.5768	-8.18925	-26.0445	0.6679	0.6575	-14.6332	-24.4335	0.9175	0.8944	-25.3732	-38.7983	1.0602	1.034	-20.8087	-31.0117	1.2053	1.2077	0.2685	-39.6037	1.4171	1.4087	-20.1375	-34.905	1.647	1.6293	-24.0308	-42.423
		24.2667		0.3639	0.3583	-6.30975	-12.4852	0.3907	0.3925	-9.80025	-11.9483	0.442	0.4403	-9.53175	-11.4112	0.5491	0.5392	-4.833	-21.6142	0.5912	0.578	-4.96725	-24.4335	0.6704	0.6587	-11.277	-22.8225	0.9173	0.8934	-25.6418	-40.1408	1.0641	1.0357	-15.573	-28.7295	1.2014	1.2045	-4.96725	-43.8998	1.4187	1.41	-17.9895	-33.1598	1.6462	1.6355	-25.1047	-34.0995
		24.3333		0.3646	0.3583	-5.37	-12.4852	0.3926	0.3911	-7.2495	-13.8277	0.4411	0.4383	-10.74	-14.0962	0.5476	0.5373	-6.84675	-24.165	0.5927	0.5766	-2.9535	-26.313	0.6691	0.6559	-13.0222	-26.5815	0.9186	0.8901	-23.8965	-44.571	1.0608	1.0283	-20.0032	-38.664	1.2001	1.2057	-6.7125	-42.2887	1.4168	1.405	-20.5402	-39.8723	1.6502	1.6383	-19.7348	-30.3405
		24.4		0.3643	0.36	-5.77275	-10.203	0.3921	0.3921	-7.92075	-12.4852	0.441	0.4375	-10.8743	-15.1702	0.5484	0.5384	-5.77275	-22.6883	0.5884	0.579	-8.72625	-23.091	0.6682	0.6633	-14.2305	-16.647	0.9137	0.8923	-30.4748	-41.6175	1.0649	1.0376	-14.499	-26.1787	1.2009	1.2013	-5.6385	-48.1958	1.4216	1.4066	-14.0963	-37.7242	1.6406	1.6332	-32.6227	-37.1873
		24.4667		0.3666	0.3586	-2.685	-12.0825	0.3905	0.3923	-10.0688	-12.2168	0.4428	0.436	-8.45775	-17.184	0.5472	0.5366	-7.38375	-25.1048	0.5899	0.574	-6.7125	-29.8035	0.6694	0.658	-12.6195	-23.7622	0.9141	0.8905	-29.9377	-44.034	1.0633	1.0295	-16.647	-37.053	1.2068	1.2086	2.28225	-38.3955	1.4233	1.4029	-11.814	-42.6915	1.648	1.6244	-22.6883	-49.0013
		24.5333		0.3654	0.359	-4.296	-11.5455	0.3912	0.3939	-9.129	-10.0688	0.4436	0.4363	-7.38375	-16.7812	0.5469	0.5385	-7.7865	-22.554	0.5877	0.5769	-9.666	-25.9102	0.6715	0.6559	-9.80025	-26.5815	0.918	0.8897	-24.702	-45.108	1.06	1.0297	-21.0773	-36.7845	1.2025	1.2115	-3.4905	-34.5023	1.4169	1.4071	-20.406	-37.053	1.6442	1.6369	-27.7897	-32.22
		24.6		0.3674	0.3622	-1.611	-7.2495	0.3931	0.3916	-6.57825	-13.1565	0.441	0.4375	-10.8743	-15.1702	0.5473	0.5407	-7.2495	-19.6005	0.5879	0.5764	-9.3975	-26.5815	0.6694	0.6575	-12.6195	-24.4335	0.9147	0.8951	-29.1323	-37.8585	1.0612	1.0291	-19.4663	-37.59	1.207	1.2076	2.55075	-39.738	1.414	1.4026	-24.2992	-43.0943	1.6445	1.6254	-27.387	-47.6588
		24.6667		0.3687	0.3583	0.13425	-12.4852	0.3929	0.3916	-6.84675	-13.1565	0.4454	0.4414	-4.96725	-9.9345	0.5488	0.5373	-5.23575	-24.165	0.5903	0.5744	-6.1755	-29.2665	0.6709	0.6596	-10.6057	-21.6142	0.9149	0.889	-28.8637	-46.0477	1.0593	1.0286	-22.017	-38.2613	1.2027	1.2087	-3.222	-38.2613	1.4209	1.4027	-15.036	-42.96	1.6442	1.6292	-27.7897	-42.5573
		24.7333		0.3683	0.3572	-0.40275	-13.962	0.3939	0.3912	-5.50425	-13.6935	0.4442	0.4384	-6.57825	-13.962	0.5486	0.5381	-5.50425	-23.091	0.5873	0.5765	-10.203	-26.4472	0.6715	0.6573	-9.80025	-24.702	0.9204	0.8915	-21.48	-42.6915	1.0639	1.0306	-15.8415	-35.5763	1.2019	1.2069	-4.296	-40.6777	1.4225	1.4042	-12.888	-40.9463	1.6514	1.6335	-18.1238	-36.7845
		24.8		0.3629	0.358	-7.65225	-12.888	0.3928	0.3908	-6.981	-14.2305	0.4411	0.4384	-10.74	-13.962	0.5495	0.5409	-4.296	-19.332	0.5904	0.5775	-6.04125	-25.1047	0.6675	0.6548	-15.1703	-28.0582	0.9153	0.8953	-28.3267	-37.59	1.0614	1.0323	-19.1978	-33.294	1.2022	1.2144	-3.89325	-30.609	1.4142	1.4074	-24.0308	-36.6503	1.6516	1.6349	-17.8553	-34.905
		24.8667		0.3632	0.3579	-7.2495	-13.0222	0.3932	0.3933	-6.444	-10.8743	0.4431	0.4382	-8.055	-14.2305	0.5455	0.5372	-9.666	-24.2993	0.5917	0.5757	-4.296	-27.5212	0.6663	0.6587	-16.7812	-22.8225	0.9249	0.8925	-15.4387	-41.349	1.0599	1.033	-21.2115	-32.3542	1.1996	1.2082	-7.38375	-38.9325	1.4187	1.4084	-17.9895	-35.3077	1.6517	1.64	-17.721	-28.0583
		24.9333		0.3658	0.3596	-3.759	-10.74	0.3931	0.391	-6.57825	-13.962	0.4439	0.4371	-6.981	-15.7072	0.5465	0.5398	-8.3235	-20.8088	0.5886	0.582	-8.45775	-19.0635	0.6703	0.6576	-11.4112	-24.2993	0.9225	0.8889	-18.6608	-46.182	1.0626	1.0329	-17.5868	-32.4885	1.2014	1.2069	-4.96725	-40.6777	1.4187	1.4063	-17.9895	-38.127	1.646	1.63	-25.3733	-41.4833
		25		0.3649	0.3591	-4.96725	-11.4112	0.3918	0.3906	-8.3235	-14.499	0.4423	0.4373	-9.129	-15.4387	0.5445	0.537	-11.0085	-24.5678	0.5895	0.5753	-7.2495	-28.0582	0.6755	0.658	-4.43025	-23.7622	0.9162	0.8925	-27.1185	-41.349	1.0615	1.0327	-19.0635	-32.757	1.2007	1.2032	-5.907	-45.645	1.419	1.4047	-17.5867	-40.275	1.6456	1.6252	-25.9103	-47.9273
		25.0667		0.3652	0.3582	-4.5645	-12.6195	0.3929	0.394	-6.84675	-9.9345	0.4403	0.4372	-11.814	-15.573	0.5473	0.5372	-7.2495	-24.2993	0.5873	0.5755	-10.203	-27.7897	0.67	0.661	-11.814	-19.7347	0.9158	0.8911	-27.6555	-43.2285	1.0636	1.0341	-16.2442	-30.8775	1.1993	1.2123	-7.7865	-33.4283	1.4188	1.4012	-17.8552	-44.9738	1.6529	1.6227	-16.11	-51.2835
		25.1333		0.3634	0.3583	-6.981	-12.4852	0.3955	0.3915	-3.35625	-13.2908	0.4428	0.4398	-8.45775	-12.0825	0.5453	0.5376	-9.9345	-23.7622	0.5922	0.5761	-3.62475	-26.9842	0.6698	0.6606	-12.0825	-20.2717	0.9188	0.8895	-23.628	-45.3765	1.0615	1.0303	-19.0635	-35.979	1.2085	1.2069	4.5645	-40.6777	1.4169	1.402	-20.406	-43.8998	1.6365	1.6278	-38.127	-44.4368
		25.2		0.3643	0.3583	-5.77275	-12.4852	0.393	0.3926	-6.7125	-11.814	0.4432	0.4352	-7.92075	-18.258	0.5477	0.5363	-6.7125	-25.5075	0.5886	0.5738	-8.45775	-30.072	0.6703	0.6585	-11.4112	-23.091	0.9184	0.8885	-24.165	-46.719	1.0658	1.0353	-13.2907	-29.2665	1.202	1.2111	-4.16175	-35.0392	1.4269	1.3981	-6.981	-49.1355	1.6447	1.6328	-27.1185	-37.7243
		25.2667		0.3636	0.358	-6.7125	-12.888	0.3931	0.3902	-6.57825	-15.036	0.4409	0.437	-11.0085	-15.8415	0.5495	0.5392	-4.296	-21.6142	0.5895	0.5758	-7.2495	-27.387	0.6708	0.6547	-10.74	-28.1925	0.926	0.8939	-13.962	-39.4695	1.0613	1.0329	-19.332	-32.4885	1.1994	1.2137	-7.65225	-31.5487	1.4164	1.4114	-21.0772	-31.2803	1.647	1.6367	-24.0308	-32.4885
		25.3333		0.366	0.3578	-3.4905	-13.1565	0.3947	0.3936	-4.43025	-10.4715	0.4414	0.4377	-10.3373	-14.9017	0.547	0.5383	-7.65225	-22.8225	0.5899	0.5734	-6.7125	-30.609	0.6695	0.6509	-12.4852	-33.294	0.9394	0.8934	4.0275	-40.1408	1.0631	1.0299	-16.9155	-36.516	1.2028	1.206	-3.08775	-41.886	1.4226	1.4086	-12.7537	-35.0393	1.6568	1.6338	-10.8743	-36.3818
		25.4		0.3633	0.3592	-7.11525	-11.277	0.3924	0.3931	-7.518	-11.1427	0.4413	0.4348	-10.4715	-18.795	0.5471	0.538	-7.518	-23.2253	0.5886	0.5726	-8.45775	-31.683	0.669	0.6551	-13.1565	-27.6555	0.9444	0.8932	10.74	-40.4092	1.0636	1.0311	-16.2442	-34.905	1.2011	1.2099	-5.37	-36.6503	1.4171	1.3997	-20.1375	-46.9875	1.6458	1.6271	-25.6418	-45.3765
		25.4667		0.3638	0.3595	-6.444	-10.8742	0.3932	0.3911	-6.444	-13.8277	0.4411	0.4359	-10.74	-17.3182	0.5492	0.5369	-4.69875	-24.702	0.5921	0.5729	-3.759	-31.2802	0.6705	0.6563	-11.1427	-26.0445	0.9321	0.8906	-5.77275	-43.8998	1.0566	1.0284	-25.6418	-38.5297	1.1977	1.214	-9.9345	-31.146	1.4189	1.4069	-17.721	-37.3215	1.6468	1.6314	-24.2993	-39.6038
		25.5333		0.3638	0.3591	-6.444	-11.4112	0.3914	0.3909	-8.8605	-14.0962	0.4409	0.4357	-11.0085	-17.5867	0.5477	0.5373	-6.7125	-24.165	0.5901	0.575	-6.444	-28.461	0.6707	0.6567	-10.8743	-25.5075	0.9203	0.8893	-21.6143	-45.645	1.0628	1.0316	-17.3183	-34.2337	1.2	1.2085	-6.84675	-38.5297	1.4212	1.4158	-14.6332	-25.3733	1.6491	1.6277	-21.2115	-44.571
		25.6		0.3652	0.3616	-4.5645	-8.055	0.3921	0.392	-7.92075	-12.6195	0.44	0.4356	-12.2168	-17.721	0.5483	0.5391	-5.907	-21.7485	0.5904	0.5776	-6.04125	-24.9705	0.6677	0.6527	-14.9018	-30.8775	0.9178	0.8935	-24.9705	-40.0065	1.0631	1.0322	-16.9155	-33.4282	1.2003	1.2111	-6.444	-35.0392	1.4147	1.4056	-23.3595	-39.0668	1.6436	1.6286	-28.5953	-43.3628
		25.6667		0.363	0.3603	-7.518	-9.80025	0.392	0.3939	-8.055	-10.0688	0.4408	0.4361	-11.1428	-17.0497	0.5464	0.5377	-8.45775	-23.628	0.5885	0.5752	-8.592	-28.1925	0.6667	0.6565	-16.2443	-25.776	0.9227	0.8901	-18.3923	-44.571	1.0623	1.0356	-17.9895	-28.8637	1.1984	1.2079	-8.99475	-39.3353	1.4182	1.4052	-18.6608	-39.6038	1.6486	1.6351	-21.8827	-34.6365
		25.7333		0.3634	0.359	-6.981	-11.5455	0.3919	0.3925	-8.18925	-11.9483	0.4411	0.4399	-10.74	-11.9482	0.5461	0.5375	-8.8605	-23.8965	0.5886	0.5755	-8.45775	-27.7897	0.6681	0.6565	-14.3647	-25.776	0.9164	0.8914	-26.85	-42.8257	1.0619	1.0332	-18.5265	-32.0858	1.2006	1.2077	-6.04125	-39.6037	1.4229	1.4087	-12.351	-34.905	1.6431	1.636	-29.2665	-33.4283
		25.8		0.3636	0.3571	-6.7125	-14.0962	0.3926	0.3908	-7.2495	-14.2305	0.4424	0.4357	-8.99475	-17.5867	0.5482	0.5383	-6.04125	-22.8225	0.5886	0.5789	-8.45775	-23.2252	0.6675	0.6576	-15.1703	-24.2993	0.9161	0.8908	-27.2527	-43.6312	1.0584	1.0308	-23.2252	-35.3077	1.2027	1.2055	-3.222	-42.5573	1.4142	1.4066	-24.0308	-37.7242	1.6433	1.6377	-28.998	-31.146
		25.8667		0.3651	0.3581	-4.69875	-12.7538	0.392	0.3906	-8.055	-14.499	0.4427	0.4368	-8.592	-16.11	0.546	0.5397	-8.99475	-20.943	0.5904	0.5751	-6.04125	-28.3268	0.6705	0.6659	-11.1427	-13.1565	0.919	0.8936	-23.3595	-39.8723	1.0677	1.0342	-10.74	-30.7432	1.2001	1.2006	-6.7125	-49.1355	1.4158	1.4059	-21.8827	-38.664	1.6421	1.6337	-30.609	-36.516
		25.9333		0.3648	0.3595	-5.1015	-10.8742	0.3932	0.3916	-6.444	-13.1565	0.4419	0.4332	-9.666	-20.943	0.5444	0.538	-11.1427	-23.2253	0.5905	0.5745	-5.907	-29.1322	0.6651	0.6608	-18.3922	-20.0032	0.9179	0.8933	-24.8362	-40.275	1.0615	1.0298	-19.0635	-36.6502	1.2007	1.2052	-5.907	-42.96	1.4157	1.4036	-22.017	-41.7518	1.6475	1.6276	-23.3595	-44.7053
		26		0.364	0.3571	-6.1755	-14.0962	0.3943	0.3902	-4.96725	-15.036	0.4428	0.4365	-8.45775	-16.5127	0.551	0.5365	-2.28225	-25.239	0.5866	0.5745	-11.1427	-29.1322	0.673	0.661	-7.7865	-19.7347	0.9143	0.8947	-29.6692	-38.3955	1.0586	1.0287	-22.9568	-38.127	1.2022	1.2091	-3.89325	-37.7242	1.4191	1.4027	-17.4525	-42.96	1.6403	1.6265	-33.0255	-46.182
		26.0667		0.3635	0.3576	-6.84675	-13.425	0.3956	0.3938	-3.222	-10.203	0.4431	0.4376	-8.055	-15.036	0.5483	0.5391	-5.907	-21.7485	0.5891	0.5745	-7.7865	-29.1322	0.6689	0.6621	-13.2907	-18.258	0.9183	0.893	-24.2993	-40.6778	1.0625	1.0275	-17.721	-39.738	1.2046	1.2145	-0.67125	-30.4748	1.4178	1.406	-19.1977	-38.5298	1.6393	1.6289	-34.368	-42.96
		26.1333		0.3643	0.3586	-5.77275	-12.0825	0.3933	0.392	-6.30975	-12.6195	0.4418	0.4386	-9.80025	-13.6935	0.544	0.5404	-11.6797	-20.0033	0.5897	0.5743	-6.981	-29.4007	0.667	0.6574	-15.8415	-24.5677	0.9198	0.8901	-22.2855	-44.571	1.0619	1.0284	-18.5265	-38.5297	1.2068	1.2127	2.28225	-32.8913	1.4215	1.4064	-14.2305	-37.9928	1.6432	1.6352	-29.1323	-34.5023
		26.2		0.3632	0.3578	-7.2495	-13.1565	0.3934	0.3921	-6.1755	-12.4852	0.441	0.4359	-10.8743	-17.3182	0.5446	0.536	-10.8742	-25.9103	0.5871	0.5736	-10.4715	-30.3405	0.6681	0.6589	-14.3647	-22.554	0.9134	0.8898	-30.8775	-44.9737	1.06	1.0336	-21.0773	-31.5487	1.2031	1.2056	-2.685	-42.423	1.4169	1.4056	-20.406	-39.0668	1.6467	1.6279	-24.4335	-44.3025
		26.2667		0.3633	0.3572	-7.11525	-13.962	0.3949	0.3936	-4.16175	-10.4715	0.4427	0.4369	-8.592	-15.9757	0.5497	0.5361	-4.0275	-25.776	0.5892	0.5767	-7.65225	-26.1787	0.6708	0.6571	-10.74	-24.9705	0.9139	0.8878	-30.2062	-47.6587	1.0645	1.0355	-15.036	-28.998	1.1986	1.2089	-8.72625	-37.9927	1.4143	1.4043	-23.8965	-40.812	1.644	1.6259	-28.0583	-46.9875
		26.3333		0.3659	0.3574	-3.62475	-13.6935	0.3921	0.3947	-7.92075	-8.99475	0.4422	0.438	-9.26325	-14.499	0.5476	0.5372	-6.84675	-24.2993	0.5892	0.5756	-7.65225	-27.6555	0.668	0.6588	-14.499	-22.6882	0.9445	0.8906	10.8743	-43.8998	1.0615	1.0319	-19.0635	-33.831	1.2056	1.2135	0.67125	-31.8173	1.4168	1.3969	-20.5402	-50.7465	1.6462	1.6327	-25.1047	-37.8585
		26.4		0.3657	0.3578	-3.89325	-13.1565	0.3923	0.3916	-7.65225	-13.1565	0.4418	0.4393	-9.80025	-12.7537	0.5468	0.5388	-7.92075	-22.1513	0.5898	0.5737	-6.84675	-30.2062	0.667	0.6636	-15.8415	-16.2442	0.9248	0.8905	-15.573	-44.034	1.0623	1.0331	-17.9895	-32.22	1.203	1.2137	-2.81925	-31.5487	1.4141	1.4159	-24.165	-25.239	1.6471	1.6283	-23.8965	-43.7655
		26.4667		0.3625	0.3604	-8.18925	-9.666	0.3915	0.3945	-8.72625	-9.26325	0.4426	0.4369	-8.72625	-15.9757	0.5468	0.5393	-7.92075	-21.48	0.5898	0.5767	-6.84675	-26.1787	0.6694	0.6618	-12.6195	-18.6607	0.9203	0.8907	-21.6143	-43.7655	1.0642	1.0314	-15.4388	-34.5022	1.2004	1.2086	-6.30975	-38.3955	1.4143	1.407	-23.8965	-37.1873	1.6527	1.6325	-16.3785	-38.127
		26.5333		0.3656	0.3585	-4.0275	-12.2167	0.3921	0.3932	-7.92075	-11.0085	0.4437	0.4358	-7.2495	-17.4525	0.5447	0.541	-10.74	-19.1978	0.5869	0.5758	-10.74	-27.387	0.6703	0.6549	-11.4112	-27.924	0.9265	0.8917	-13.2907	-42.423	1.0605	1.0298	-20.406	-36.6502	1.206	1.2107	1.20825	-35.5762	1.4241	1.4056	-10.74	-39.0668	1.6514	1.6244	-18.1238	-49.0013
		26.6		0.3639	0.36	-6.30975	-10.203	0.3913	0.3921	-8.99475	-12.4852	0.4456	0.4362	-4.69875	-16.9155	0.5491	0.5362	-4.833	-25.6418	0.5893	0.5754	-7.518	-27.924	0.6656	0.6522	-17.721	-31.5487	0.9197	0.8926	-22.4198	-41.2148	1.0605	1.0313	-20.406	-34.6365	1.2036	1.2117	-2.01375	-34.2337	1.419	1.4022	-17.5867	-43.6313	1.6461	1.6353	-25.239	-34.368
		26.6667		0.3628	0.3583	-7.7865	-12.4852	0.3936	0.3925	-5.907	-11.9483	0.441	0.4358	-10.8743	-17.4525	0.5445	0.5387	-11.0085	-22.2855	0.5895	0.5762	-7.2495	-26.85	0.6697	0.6575	-12.2168	-24.4335	0.9186	0.8934	-23.8965	-40.1408	1.0641	1.028	-15.573	-39.0667	1.2026	1.2089	-3.35625	-37.9927	1.415	1.408	-22.9567	-35.8448	1.6529	1.6242	-16.11	-49.2698
		26.7333		0.3642	0.3587	-5.907	-11.9482	0.3946	0.3902	-4.5645	-15.036	0.4412	0.4376	-10.6058	-15.036	0.5457	0.5373	-9.3975	-24.165	0.5904	0.5745	-6.04125	-29.1322	0.6688	0.6568	-13.425	-25.3732	0.9156	0.8898	-27.924	-44.9737	1.0642	1.0289	-15.4388	-37.8585	1.202	1.2068	-4.16175	-40.812	1.4158	1.4006	-21.8827	-45.7793	1.6537	1.6286	-15.036	-43.3628
		26.8		0.3664	0.3582	-2.9535	-12.6195	0.3932	0.3911	-6.444	-13.8277	0.4452	0.4348	-5.23575	-18.795	0.5463	0.5394	-8.592	-21.3458	0.5882	0.576	-8.99475	-27.1185	0.6656	0.6632	-17.721	-16.7812	0.9184	0.8916	-24.165	-42.5573	1.0641	1.0317	-15.573	-34.0995	1.2013	1.207	-5.1015	-40.5435	1.4104	1.4041	-29.1322	-41.0805	1.6517	1.6301	-17.721	-41.349
		26.8667		0.3669	0.3572	-2.28225	-13.962	0.3922	0.3899	-7.7865	-15.4387	0.4459	0.4365	-4.296	-16.5127	0.5467	0.5356	-8.055	-26.4473	0.5912	0.5735	-4.96725	-30.4747	0.6656	0.6539	-17.721	-29.2665	0.9171	0.8954	-25.9102	-37.4558	1.0594	1.027	-21.8828	-40.4092	1.2036	1.2032	-2.01375	-45.645	1.4163	1.4031	-21.2115	-42.423	1.6528	1.6331	-16.2443	-37.3215
		26.9333		0.3628	0.3566	-7.7865	-14.7675	0.3903	0.3933	-10.3373	-10.8743	0.4457	0.4378	-4.5645	-14.7675	0.5473	0.5349	-7.2495	-27.387	0.5906	0.5736	-5.77275	-30.3405	0.6684	0.6559	-13.962	-26.5815	0.9115	0.8875	-33.4282	-48.0615	1.0626	1.0279	-17.5868	-39.201	1.2005	1.2077	-6.1755	-39.6037	1.4202	1.409	-15.9758	-34.5023	1.6539	1.6321	-14.7675	-38.664
		27		0.3652	0.3569	-4.5645	-14.3648	0.3909	0.3911	-9.53175	-13.8277	0.443	0.4366	-8.18925	-16.3785	0.5449	0.5369	-10.4715	-24.702	0.5915	0.5748	-4.5645	-28.7295	0.667	0.6543	-15.8415	-28.7295	0.9161	0.8887	-27.2527	-46.4505	1.0637	1.0278	-16.11	-39.3352	1.2014	1.2059	-4.96725	-42.0203	1.4208	1.4061	-15.1702	-38.3955	1.6515	1.6376	-17.9895	-31.2803
		27.0667		0.3663	0.3585	-3.08775	-12.2167	0.3945	0.3893	-4.69875	-16.2443	0.4413	0.4386	-10.4715	-13.6935	0.5468	0.5358	-7.92075	-26.1787	0.5884	0.5757	-8.72625	-27.5212	0.6663	0.6571	-16.7812	-24.9705	0.9191	0.8878	-23.2252	-47.6587	1.0675	1.0265	-11.0085	-41.0805	1.1982	1.2075	-9.26325	-39.8722	1.4165	1.4054	-20.943	-39.3353	1.6435	1.6317	-28.7295	-39.201
		27.1333		0.3661	0.359	-3.35625	-11.5455	0.3929	0.3909	-6.84675	-14.0962	0.4423	0.4349	-9.129	-18.6607	0.5491	0.5366	-4.833	-25.1048	0.5885	0.5758	-8.592	-27.387	0.6693	0.6537	-12.7538	-29.535	0.9161	0.8882	-27.2527	-47.1218	1.061	1.0299	-19.7348	-36.516	1.2003	1.2064	-6.444	-41.349	1.4158	1.4067	-21.8827	-37.59	1.6483	1.636	-22.2855	-33.4283
		27.2		0.3657	0.3605	-3.89325	-9.53175	0.3919	0.3892	-8.18925	-16.3785	0.4416	0.4376	-10.0688	-15.036	0.5483	0.5357	-5.907	-26.313	0.5915	0.5734	-4.5645	-30.609	0.6677	0.6544	-14.9018	-28.5952	0.9156	0.887	-27.924	-48.7327	1.0618	1.0267	-18.6607	-40.812	1.2047	1.2053	-0.537	-42.8257	1.4177	1.4044	-19.332	-40.6778	1.6471	1.628	-23.8965	-44.1683
		27.2667		0.3647	0.3585	-5.23575	-12.2167	0.3929	0.3903	-6.84675	-14.9018	0.4419	0.4371	-9.666	-15.7072	0.5465	0.538	-8.3235	-23.2253	0.5893	0.5743	-7.518	-29.4007	0.6657	0.6545	-17.5868	-28.461	0.9146	0.8869	-29.2665	-48.867	1.0627	1.0305	-17.4525	-35.7105	1.2022	1.2066	-3.89325	-41.0805	1.4142	1.4017	-24.0308	-44.3025	1.659	1.6295	-7.92075	-42.1545
		27.3333		0.3628	0.3596	-7.7865	-10.74	0.392	0.3901	-8.055	-15.1703	0.4404	0.4349	-11.6798	-18.6607	0.5503	0.5377	-3.222	-23.628	0.5915	0.5758	-4.5645	-27.387	0.6654	0.6528	-17.9895	-30.7432	0.9159	0.887	-27.5212	-48.7327	1.0583	1.0306	-23.3595	-35.5763	1.1992	1.2067	-7.92075	-40.9462	1.4144	1.41	-23.7622	-33.1598	1.6604	1.6298	-6.04125	-41.7518
		27.4		0.363	0.3563	-7.518	-15.1702	0.3924	0.3909	-7.518	-14.0962	0.4418	0.4381	-9.80025	-14.3647	0.5471	0.5348	-7.518	-27.5213	0.5877	0.5736	-9.666	-30.3405	0.6668	0.6524	-16.11	-31.2802	0.9122	0.8911	-32.4885	-43.2285	1.0664	1.0297	-12.4852	-36.7845	1.2023	1.206	-3.759	-41.886	1.4112	1.4019	-28.0582	-44.034	1.6592	1.6242	-7.65225	-49.2698
		27.4667		0.3644	0.3577	-5.6385	-13.2907	0.3941	0.3906	-5.23575	-14.499	0.4417	0.4353	-9.9345	-18.1237	0.5475	0.5378	-6.981	-23.4938	0.591	0.5723	-5.23575	-32.0857	0.669	0.6517	-13.1565	-32.22	0.9154	0.8916	-28.1925	-42.5573	1.0632	1.0343	-16.7813	-30.609	1.2037	1.2075	-1.8795	-39.8722	1.418	1.4077	-18.9292	-36.2475	1.6566	1.6257	-11.1427	-47.256
		27.5333		0.3628	0.3583	-7.7865	-12.4852	0.3902	0.3916	-10.4715	-13.1565	0.4401	0.4343	-12.0825	-19.4662	0.5463	0.5373	-8.592	-24.165	0.5863	0.5732	-11.5455	-30.8775	0.6705	0.6499	-11.1427	-34.6365	0.9153	0.8942	-28.3267	-39.0667	1.062	1.0294	-18.3922	-37.1872	1.1976	1.2091	-10.0688	-37.7242	1.4172	1.4056	-20.0032	-39.0668	1.6432	1.6247	-29.1323	-48.5985
		27.6		0.3633	0.3601	-7.11525	-10.0688	0.3935	0.3894	-6.04125	-16.11	0.4429	0.4356	-8.3235	-17.721	0.549	0.5371	-4.96725	-24.4335	0.5888	0.5721	-8.18925	-32.3542	0.6666	0.6547	-16.3785	-28.1925	0.9165	0.8877	-26.7157	-47.793	1.059	1.0315	-22.4198	-34.368	1.2085	1.2119	4.5645	-33.9652	1.4212	1.4079	-14.6332	-35.979	1.6469	1.6345	-24.165	-35.442
		27.6667		0.3644	0.359	-5.6385	-11.5455	0.3913	0.3912	-8.99475	-13.6935	0.4411	0.4366	-10.74	-16.3785	0.5474	0.5379	-7.11525	-23.3595	0.5899	0.5748	-6.7125	-28.7295	0.6716	0.6535	-9.666	-29.8035	0.9149	0.8898	-28.8637	-44.9737	1.0623	1.0272	-17.9895	-40.1408	1.1982	1.2095	-9.26325	-37.1872	1.4153	1.4029	-22.554	-42.6915	1.6561	1.6256	-11.814	-47.3903
		27.7333		0.3632	0.3601	-7.2495	-10.0688	0.3935	0.3912	-6.04125	-13.6935	0.4417	0.4359	-9.9345	-17.3182	0.5469	0.5392	-7.7865	-21.6142	0.586	0.5735	-11.9482	-30.4747	0.6684	0.6585	-13.962	-23.091	0.914	0.8844	-30.072	-52.2233	1.0595	1.0295	-21.7485	-37.053	1.2053	1.2099	0.2685	-36.6503	1.4169	1.4005	-20.406	-45.9135	1.6525	1.6281	-16.647	-44.034
		27.8		0.3639	0.3589	-6.30975	-11.6798	0.3914	0.3921	-8.8605	-12.4852	0.442	0.4359	-9.53175	-17.3182	0.5497	0.5349	-4.0275	-27.387	0.5899	0.5741	-6.7125	-29.6692	0.6696	0.6579	-12.351	-23.8965	0.9135	0.8851	-30.7432	-51.2835	1.0617	1.03	-18.795	-36.3817	1.2055	1.2042	0.537	-44.3025	1.4199	1.3972	-16.3785	-50.3438	1.6427	1.627	-29.8035	-45.5108
		27.8667		0.3643	0.3619	-5.77275	-7.65225	0.3928	0.3911	-6.981	-13.8277	0.4506	0.4348	2.01375	-18.795	0.545	0.5381	-10.3372	-23.091	0.5884	0.5743	-8.72625	-29.4007	0.6719	0.6527	-9.26325	-30.8775	0.918	0.8912	-24.702	-43.0942	1.0622	1.0323	-18.1237	-33.294	1.2003	1.2088	-6.444	-38.127	1.4184	1.4067	-18.3922	-37.59	1.6433	1.6266	-28.998	-46.0478
		27.9333		0.3639	0.3585	-6.30975	-12.2167	0.3916	0.3908	-8.592	-14.2305	0.4599	0.4345	14.499	-19.1977	0.5487	0.5362	-5.37	-25.6418	0.5876	0.5749	-9.80025	-28.5952	0.6717	0.6548	-9.53175	-28.0582	0.9136	0.8892	-30.609	-45.7793	1.0607	1.0279	-20.1375	-39.201	1.1995	1.202	-7.518	-47.256	1.4132	1.4004	-25.3732	-46.0477	1.6386	1.6295	-35.3077	-42.1545
		28		0.3642	0.3582	-5.907	-12.6195	0.3932	0.3881	-6.444	-17.8552	0.4437	0.4348	-7.2495	-18.795	0.5477	0.5363	-6.7125	-25.5075	0.5882	0.575	-8.99475	-28.461	0.6752	0.6529	-4.833	-30.609	0.9139	0.8872	-30.2062	-48.4642	1.0607	1.0265	-20.1375	-41.0805	1.2057	1.2058	0.8055	-42.1545	1.4188	1.4008	-17.8552	-45.5108	1.645	1.6306	-26.7158	-40.6778
		28.0667		0.3639	0.3577	-6.30975	-13.2907	0.3934	0.3911	-6.1755	-13.8277	0.4428	0.4327	-8.45775	-21.6142	0.5475	0.5349	-6.981	-27.387	0.5888	0.5743	-8.18925	-29.4007	0.6684	0.6504	-13.962	-33.9652	0.9157	0.8852	-27.7898	-51.1493	1.0656	1.0264	-13.5592	-41.2147	1.2015	1.2107	-4.833	-35.5762	1.4119	1.4051	-27.1185	-39.738	1.6479	1.6361	-22.8225	-33.294
		28.1333		0.3636	0.3601	-6.7125	-10.0688	0.3925	0.39	-7.38375	-15.3045	0.4405	0.4344	-11.5455	-19.332	0.5472	0.5385	-7.38375	-22.554	0.5885	0.5746	-8.592	-28.998	0.6675	0.6557	-15.1703	-26.85	0.9171	0.8862	-25.9102	-49.8068	1.0576	1.032	-24.2992	-33.6967	1.2022	1.2079	-3.89325	-39.3353	1.4167	1.4045	-20.6745	-40.5435	1.6444	1.6351	-27.5213	-34.6365
		28.2		0.3661	0.3567	-3.35625	-14.6332	0.3915	0.391	-8.72625	-13.962	0.4412	0.4319	-10.6058	-22.6882	0.5485	0.537	-5.6385	-24.5678	0.587	0.5715	-10.6057	-33.1597	0.6643	0.6576	-19.4663	-24.2993	0.9146	0.8874	-29.2665	-48.1958	1.0604	1.024	-20.5402	-44.4367	1.2032	1.2075	-2.55075	-39.8722	1.4177	1.4029	-19.332	-42.6915	1.6329	1.635	-42.96	-34.7708
		28.2667		0.3647	0.36	-5.23575	-10.203	0.3896	0.388	-11.277	-17.9895	0.4431	0.4367	-8.055	-16.2442	0.5507	0.5379	-2.685	-23.3595	0.5909	0.5739	-5.37	-29.9377	0.6695	0.6523	-12.4852	-31.4145	0.9156	0.8866	-27.924	-49.2697	1.0584	1.0302	-23.2252	-36.1132	1.1995	1.2086	-7.518	-38.3955	1.4179	1.4033	-19.0635	-42.1545	1.6472	1.6306	-23.7623	-40.6778
		28.3333		0.3622	0.3585	-8.592	-12.2167	0.391	0.3906	-9.3975	-14.499	0.442	0.4368	-9.53175	-16.11	0.5457	0.5362	-9.3975	-25.6418	0.5898	0.5738	-6.84675	-30.072	0.6689	0.6529	-13.2907	-30.609	0.9156	0.8847	-27.924	-51.8205	1.0624	1.0306	-17.8552	-35.5763	1.2067	1.206	2.148	-41.886	1.4229	1.4049	-12.351	-40.0065	1.6456	1.6262	-25.9103	-46.5847
		28.4		0.3643	0.3577	-5.77275	-13.2907	0.3936	0.3913	-5.907	-13.5593	0.4421	0.436	-9.3975	-17.184	0.5495	0.5338	-4.296	-28.8637	0.5877	0.5773	-9.666	-25.3732	0.6683	0.6571	-14.0963	-24.9705	0.9118	0.8883	-33.0255	-46.9875	1.0639	1.0259	-15.8415	-41.886	1.2005	1.1989	-6.1755	-51.4177	1.4239	1.4047	-11.0085	-40.275	1.6442	1.6212	-27.7897	-53.2973
		28.4667		0.3644	0.3613	-5.6385	-8.45775	0.3926	0.3905	-7.2495	-14.6332	0.4411	0.4345	-10.74	-19.1977	0.5458	0.5358	-9.26325	-26.1787	0.5892	0.5729	-7.65225	-31.2802	0.6671	0.6554	-15.7072	-27.2527	0.9147	0.889	-29.1323	-46.0477	1.062	1.0281	-18.3922	-38.9325	1.2007	1.2051	-5.907	-43.0942	1.4205	1.4038	-15.573	-41.4833	1.6467	1.6343	-24.4335	-35.7105
		28.5333		0.3635	0.3592	-6.84675	-11.277	0.3928	0.3909	-6.981	-14.0962	0.4429	0.4382	-8.3235	-14.2305	0.5492	0.5338	-4.69875	-28.8637	0.589	0.5737	-7.92075	-30.2062	0.6676	0.6565	-15.036	-25.776	0.9156	0.8905	-27.924	-44.034	1.0582	1.023	-23.4937	-45.7793	1.2032	1.2049	-2.55075	-43.3627	1.4143	1.4017	-23.8965	-44.3025	1.6537	1.6273	-15.036	-45.108
		28.6		0.3633	0.3594	-7.11525	-11.0085	0.3904	0.3882	-10.203	-17.721	0.4423	0.4353	-9.129	-18.1237	0.5464	0.5357	-8.45775	-26.313	0.5856	0.5753	-12.4852	-28.0582	0.6678	0.6511	-14.7675	-33.0255	0.9151	0.8903	-28.5952	-44.3025	1.0581	1.0283	-23.628	-38.664	1.2014	1.2063	-4.96725	-41.4832	1.4182	1.3973	-18.6608	-50.2095	1.6442	1.6272	-27.7897	-45.2423
		28.6667		0.364	0.3575	-6.1755	-13.5592	0.3907	0.3905	-9.80025	-14.6332	0.44	0.4346	-12.2168	-19.0635	0.5467	0.5353	-8.055	-26.85	0.5887	0.5752	-8.3235	-28.1925	0.6702	0.6544	-11.5455	-28.5952	0.9142	0.8894	-29.8035	-45.5108	1.0624	1.0312	-17.8552	-34.7708	1.1993	1.2101	-7.7865	-36.3818	1.4158	1.4006	-21.8827	-45.7793	1.6455	1.6343	-26.0445	-35.7105
		28.7333		0.3633	0.3579	-7.11525	-13.0222	0.3916	0.3904	-8.592	-14.7675	0.4431	0.4361	-8.055	-17.0497	0.5464	0.5394	-8.45775	-21.3458	0.5892	0.5746	-7.65225	-28.998	0.6673	0.6562	-15.4388	-26.1787	0.9179	0.8873	-24.8362	-48.33	1.064	1.0348	-15.7072	-29.9377	1.1997	1.2061	-7.2495	-41.7518	1.4228	1.4007	-12.4852	-45.645	1.6522	1.6281	-17.0498	-44.034
		28.8		0.3663	0.3581	-3.08775	-12.7538	0.3931	0.391	-6.57825	-13.962	0.4418	0.4367	-9.80025	-16.2442	0.5448	0.533	-10.6057	-29.9378	0.5896	0.5721	-7.11525	-32.3542	0.6702	0.6565	-11.5455	-25.776	0.9141	0.8907	-29.9377	-43.7655	1.0621	1.0256	-18.258	-42.2887	1.2045	1.2067	-0.8055	-40.9462	1.4142	1.4009	-24.0308	-45.3765	1.6439	1.6203	-28.1925	-54.5055
		28.8667		0.3662	0.3591	-3.222	-11.4112	0.3939	0.39	-5.50425	-15.3045	0.4428	0.4329	-8.45775	-21.3457	0.5483	0.5376	-5.907	-23.7622	0.5891	0.5745	-7.7865	-29.1322	0.6671	0.6558	-15.7072	-26.7157	0.9146	0.8863	-29.2665	-49.6725	1.0627	1.029	-17.4525	-37.7242	1.1954	1.1993	-13.0222	-50.8808	1.4173	1.3984	-19.869	-48.7328	1.6482	1.6356	-22.4198	-33.9653
		28.9333		0.364	0.3599	-6.1755	-10.3372	0.3902	0.3915	-10.4715	-13.2908	0.4473	0.4334	-2.4165	-20.6745	0.5466	0.5346	-8.18925	-27.7898	0.5907	0.5723	-5.6385	-32.0857	0.6688	0.6573	-13.425	-24.702	0.9158	0.8827	-27.6555	-54.5055	1.0656	1.0337	-13.5592	-31.4145	1.1979	1.2011	-9.666	-48.4642	1.419	1.4106	-17.5867	-32.3543	1.6501	1.6282	-19.869	-43.8998
		29		0.3632	0.3577	-7.2495	-13.2907	0.3911	0.3911	-9.26325	-13.8277	0.4419	0.4345	-9.666	-19.1977	0.5457	0.5369	-9.3975	-24.702	0.5872	0.5735	-10.3372	-30.4747	0.6682	0.6569	-14.2305	-25.239	0.9149	0.8845	-28.8637	-52.089	1.0615	1.0249	-19.0635	-43.2285	1.2011	1.2045	-5.37	-43.8998	1.4176	1.3979	-19.4662	-49.404	1.6437	1.6201	-28.461	-54.774
		29.0667		0.3646	0.3588	-5.37	-11.814	0.3919	0.3923	-8.18925	-12.2168	0.4411	0.4333	-10.74	-20.8087	0.5492	0.536	-4.69875	-25.9103	0.5913	0.5757	-4.833	-27.5212	0.6657	0.6544	-17.5868	-28.5952	0.9161	0.8852	-27.2527	-51.1493	1.0589	1.0235	-22.554	-45.108	1.1977	1.2052	-9.9345	-42.96	1.4156	1.4007	-22.1512	-45.645	1.6365	1.6263	-38.127	-46.4505
		29.1333		0.3622	0.3573	-8.592	-13.8277	0.3928	0.3877	-6.981	-18.3922	0.4411	0.4343	-10.74	-19.4662	0.5481	0.5345	-6.1755	-27.924	0.589	0.573	-7.92075	-31.146	0.6697	0.6546	-12.2168	-28.3267	0.9115	0.8831	-33.4282	-53.9685	1.0628	1.0255	-17.3183	-42.423	1.2023	1.2034	-3.759	-45.3765	1.42	1.4006	-16.2442	-45.7793	1.6441	1.6274	-27.924	-44.9738
		29.2		0.3625	0.3576	-8.18925	-13.425	0.3928	0.39	-6.981	-15.3045	0.4422	0.4328	-9.26325	-21.48	0.5457	0.5357	-9.3975	-26.313	0.5883	0.572	-8.8605	-32.4885	0.665	0.6552	-18.5265	-27.5212	0.915	0.8861	-28.7295	-49.941	1.0614	1.0303	-19.1978	-35.979	1.1958	1.2058	-12.4853	-42.1545	1.4148	1.4073	-23.2252	-36.7845	1.644	1.6268	-28.0583	-45.7793
		29.2667		0.3636	0.3561	-6.7125	-15.4387	0.3939	0.3907	-5.50425	-14.3647	0.4394	0.435	-13.0222	-18.5265	0.5466	0.5369	-8.18925	-24.702	0.5907	0.5748	-5.6385	-28.7295	0.6669	0.6539	-15.9757	-29.2665	0.916	0.886	-27.387	-50.0753	1.0644	1.0292	-15.1702	-37.4558	1.2006	1.1968	-6.04125	-54.237	1.421	1.4058	-14.9017	-38.7983	1.6447	1.6331	-27.1185	-37.3215
		29.3333		0.3636	0.3582	-6.7125	-12.6195	0.3969	0.3922	-1.47675	-12.351	0.4412	0.4338	-10.6058	-20.1375	0.5456	0.535	-9.53175	-27.2527	0.5897	0.5718	-6.981	-32.757	0.6654	0.6547	-17.9895	-28.1925	0.9172	0.8891	-25.776	-45.9135	1.0623	1.0299	-17.9895	-36.516	1.2002	1.2036	-6.57825	-45.108	1.4183	1.4006	-18.5265	-45.7793	1.642	1.6295	-30.7432	-42.1545
		29.4		0.3642	0.3573	-5.907	-13.8277	0.3934	0.3887	-6.1755	-17.0498	0.4399	0.4362	-12.351	-16.9155	0.5468	0.5345	-7.92075	-27.924	0.5867	0.5734	-11.0085	-30.609	0.6627	0.6552	-21.6143	-27.5212	0.9119	0.8857	-32.8912	-50.478	1.0616	1.0315	-18.9292	-34.368	1.2013	1.2115	-5.1015	-34.5023	1.4176	1.4037	-19.4662	-41.6175	1.6514	1.6264	-18.1238	-46.3163
		29.4667		0.3654	0.3543	-4.296	-17.8552	0.3938	0.3904	-5.6385	-14.7675	0.4416	0.4334	-10.0688	-20.6745	0.5494	0.5361	-4.43025	-25.776	0.5898	0.5717	-6.84675	-32.8913	0.6668	0.6531	-16.11	-30.3405	0.9128	0.8846	-31.683	-51.9547	1.0621	1.0229	-18.258	-45.9135	1.1964	1.1991	-11.6798	-51.1492	1.4186	1.3969	-18.1237	-50.7465	1.6432	1.6226	-29.1323	-51.4178
		29.5333		0.3634	0.3568	-6.981	-14.499	0.3929	0.391	-6.84675	-13.962	0.4416	0.4336	-10.0688	-20.406	0.5473	0.5344	-7.2495	-28.0583	0.5899	0.5725	-6.7125	-31.8172	0.6692	0.6534	-12.888	-29.9377	0.9138	0.8852	-30.3405	-51.1493	1.0618	1.0261	-18.6607	-41.6175	1.2036	1.2054	-2.01375	-42.6915	1.4151	1.4012	-22.8225	-44.9738	1.6392	1.6273	-34.5023	-45.108
		29.6		0.3646	0.3584	-5.37	-12.351	0.3929	0.3885	-6.84675	-17.3183	0.4412	0.4361	-10.6058	-17.0497	0.5466	0.5357	-8.18925	-26.313	0.5914	0.5712	-4.69875	-33.5625	0.6647	0.6514	-18.9293	-32.6227	0.9117	0.8835	-33.1598	-53.4315	1.0631	1.0298	-16.9155	-36.6502	1.2024	1.2035	-3.62475	-45.2423	1.4185	1.4033	-18.258	-42.1545	1.6471	1.627	-23.8965	-45.5108
		29.6667		0.3642	0.3574	-5.907	-13.6935	0.3942	0.3891	-5.1015	-16.5127	0.4417	0.4347	-9.9345	-18.9292	0.5475	0.5378	-6.981	-23.4938	0.5888	0.5702	-8.18925	-34.905	0.6688	0.6495	-13.425	-35.1735	0.9148	0.886	-28.998	-50.0753	1.0563	1.0275	-26.0445	-39.738	1.2052	1.201	0.13425	-48.5985	1.4137	1.4065	-24.702	-37.8585	1.6493	1.6291	-20.943	-42.6915
		29.7333		0.3619	0.3578	-8.99475	-13.1565	0.3926	0.3883	-7.2495	-17.5868	0.4414	0.4358	-10.3373	-17.4525	0.5455	0.5336	-9.666	-29.1323	0.5895	0.5735	-7.2495	-30.4747	0.6638	0.6518	-20.1375	-32.0857	0.918	0.8859	-24.702	-50.2095	1.0638	1.0256	-15.9757	-42.2887	1.1978	1.1985	-9.80025	-51.9548	1.4147	1.4087	-23.3595	-34.905	1.6485	1.6247	-22.017	-48.5985
		29.8		0.3645	0.3595	-5.50425	-10.8742	0.3921	0.3905	-7.92075	-14.6332	0.442	0.4343	-9.53175	-19.4662	0.548	0.5368	-6.30975	-24.8362	0.5876	0.5731	-9.80025	-31.0117	0.6667	0.6533	-16.2443	-30.072	0.9142	0.8877	-29.8035	-47.793	1.0647	1.031	-14.7675	-35.0392	1.2021	1.2006	-4.0275	-49.1355	1.417	1.3984	-20.2717	-48.7328	1.6514	1.6311	-18.1238	-40.0065
		29.8667		0.3642	0.3593	-5.907	-11.1427	0.392	0.3911	-8.055	-13.8277	0.4412	0.4356	-10.6058	-17.721	0.5452	0.5356	-10.0687	-26.4473	0.5876	0.5737	-9.80025	-30.2062	0.6641	0.6487	-19.7347	-36.2475	0.9197	0.8887	-22.4198	-46.4505	1.0621	1.0255	-18.258	-42.423	1.2002	1.1963	-6.57825	-54.9082	1.4147	1.4034	-23.3595	-42.0203	1.6501	1.627	-19.869	-45.5108
		29.9333		0.3651	0.36	-4.69875	-10.203	0.3916	0.3908	-8.592	-14.2305	0.4417	0.434	-9.9345	-19.869	0.5443	0.5342	-11.277	-28.3267	0.5855	0.5751	-12.6195	-28.3268	0.6668	0.6552	-16.11	-27.5212	0.9142	0.8918	-29.8035	-42.2887	1.0636	1.0335	-16.2442	-31.683	1.1978	1.1973	-9.80025	-53.5657	1.4178	1.403	-19.1977	-42.5573	1.6439	1.6228	-28.1925	-51.1493
		30		0.3648	0.3552	-5.1015	-16.647	0.3928	0.392	-6.981	-12.6195	0.4417	0.4337	-9.9345	-20.2717	0.5469	0.5351	-7.7865	-27.1185	0.5879	0.5737	-9.3975	-30.2062	0.6663	0.6604	-16.7812	-20.5402	0.9155	0.8902	-28.0583	-44.4367	1.0623	1.0276	-17.9895	-39.6037	1.2018	1.2009	-4.43025	-48.7327	1.4127	1.4047	-26.0445	-40.275	1.6379	1.6289	-36.2475	-42.96
		30.0667		0.3639	0.3583	-6.30975	-12.4852	0.3937	0.3906	-5.77275	-14.499	0.4417	0.4337	-9.9345	-20.2717	0.5467	0.5327	-8.055	-30.3405	0.5864	0.5719	-11.4112	-32.6227	0.6692	0.6556	-12.888	-26.9842	0.9132	0.8857	-31.146	-50.478	1.0622	1.0299	-18.1237	-36.516	1.2052	1.2004	0.13425	-49.404	1.4177	1.3976	-19.332	-49.8068	1.6395	1.6324	-34.0995	-38.2613
		30.1333		0.3639	0.3562	-6.30975	-15.3045	0.391	0.3889	-9.3975	-16.7812	0.4415	0.4336	-10.203	-20.406	0.5465	0.5337	-8.3235	-28.998	0.5889	0.5709	-8.055	-33.9652	0.6652	0.6531	-18.258	-30.3405	0.9209	0.8833	-20.8087	-53.7	1.0647	1.0268	-14.7675	-40.6777	1.1988	1.1987	-8.45775	-51.6862	1.4153	1.406	-22.554	-38.5298	1.6473	1.625	-23.628	-48.1958
		30.2		0.3639	0.3562	-6.30975	-15.3045	0.3919	0.3897	-8.18925	-15.7073	0.4421	0.4324	-9.3975	-22.017	0.5463	0.5335	-8.592	-29.2665	0.5884	0.5709	-8.72625	-33.9652	0.6709	0.6517	-10.6057	-32.22	0.9151	0.8855	-28.5952	-50.7465	1.0585	1.0296	-23.091	-36.9187	1.202	1.1971	-4.16175	-53.8342	1.4192	1.3977	-17.3182	-49.6725	1.6428	1.6261	-29.6693	-46.719
		30.2667		0.3644	0.3578	-5.6385	-13.1565	0.393	0.3897	-6.7125	-15.7073	0.4403	0.4343	-11.814	-19.4662	0.5461	0.5348	-8.8605	-27.5213	0.5892	0.572	-7.65225	-32.4885	0.667	0.6511	-15.8415	-33.0255	0.9129	0.8858	-31.5487	-50.3438	1.056	1.0263	-26.4472	-41.349	1.2009	1.1975	-5.6385	-53.2973	1.4135	1.4035	-24.9705	-41.886	1.6446	1.6156	-27.2528	-60.8153
		30.3333		0.3634	0.3601	-6.981	-10.0688	0.3928	0.39	-6.981	-15.3045	0.4403	0.4349	-11.814	-18.6607	0.5466	0.5388	-8.18925	-22.1513	0.5902	0.5734	-6.30975	-30.609	0.6659	0.65	-17.3182	-34.5022	0.9152	0.8872	-28.461	-48.4642	1.0617	1.0244	-18.795	-43.8997	1.2058	1.1941	0.93975	-57.8618	1.4152	1.3981	-22.6882	-49.1355	1.6429	1.6253	-29.535	-47.793
		30.4		0.3648	0.3589	-5.1015	-11.6798	0.3933	0.3894	-6.30975	-16.11	0.4408	0.4317	-11.1428	-22.9567	0.5478	0.5352	-6.57825	-26.9842	0.5886	0.572	-8.45775	-32.4885	0.6681	0.6548	-14.3647	-28.0582	0.912	0.886	-32.757	-50.0753	1.0628	1.0293	-17.3183	-37.3215	1.2021	1.1964	-4.0275	-54.774	1.4188	1.405	-17.8552	-39.8723	1.655	1.6205	-13.2908	-54.237
		30.4667		0.3621	0.3582	-8.72625	-12.6195	0.3916	0.3901	-8.592	-15.1703	0.4412	0.4346	-10.6058	-19.0635	0.5474	0.5339	-7.11525	-28.7295	0.5866	0.5744	-11.1427	-29.2665	0.6662	0.6526	-16.9155	-31.0118	0.9158	0.8924	-27.6555	-41.4832	1.0587	1.0276	-22.8225	-39.6037	1.2019	1.1983	-4.296	-52.2233	1.4231	1.4054	-12.0825	-39.3353	1.6421	1.6224	-30.609	-51.6863
		30.5333		0.3644	0.3576	-5.6385	-13.425	0.3932	0.3908	-6.444	-14.2305	0.4402	0.4324	-11.9483	-22.017	0.5452	0.5361	-10.0687	-25.776	0.5865	0.5702	-11.277	-34.905	0.669	0.6591	-13.1565	-22.2855	0.9185	0.8848	-24.0307	-51.6862	1.0571	1.0235	-24.9705	-45.108	1.2068	1.1992	2.28225	-51.015	1.4183	1.4032	-18.5265	-42.2888	1.6438	1.6228	-28.3268	-51.1493
		30.6		0.3643	0.357	-5.77275	-14.2305	0.3927	0.3931	-7.11525	-11.1427	0.4406	0.4326	-11.4113	-21.7485	0.5462	0.5339	-8.72625	-28.7295	0.5897	0.5707	-6.981	-34.2337	0.6676	0.6596	-15.036	-21.6142	0.9183	0.8861	-24.2993	-49.941	1.0658	1.0242	-13.2907	-44.1682	1.1985	1.2015	-8.8605	-47.9272	1.419	1.3979	-17.5867	-49.404	1.6486	1.6234	-21.8827	-50.3438
		30.6667		0.3638	0.3586	-6.444	-12.0825	0.393	0.3897	-6.7125	-15.7073	0.4418	0.4368	-9.80025	-16.11	0.5436	0.5368	-12.2167	-24.8362	0.5873	0.5731	-10.203	-31.0117	0.6652	0.6525	-18.258	-31.146	0.9149	0.8864	-28.8637	-49.5383	1.0654	1.0251	-13.8278	-42.96	1.2039	1.1972	-1.611	-53.7	1.4124	1.4006	-26.4472	-45.7793	1.6445	1.628	-27.387	-44.1683
		30.7333		0.3665	0.3586	-2.81925	-12.0825	0.3924	0.3908	-7.518	-14.2305	0.4423	0.4326	-9.129	-21.7485	0.5466	0.5353	-8.18925	-26.85	0.5889	0.5686	-8.055	-37.053	0.6682	0.6519	-14.2305	-31.9515	0.916	0.8852	-27.387	-51.1493	1.0619	1.0242	-18.5265	-44.1682	1.1981	1.2011	-9.3975	-48.4642	1.4173	1.4016	-19.869	-44.4368	1.6401	1.6321	-33.294	-38.664
		30.8		0.3641	0.3582	-6.04125	-12.6195	0.3951	0.3895	-3.89325	-15.9757	0.4409	0.4345	-11.0085	-19.1977	0.5501	0.5326	-3.4905	-30.4748	0.5889	0.5706	-8.055	-34.368	0.6662	0.6532	-16.9155	-30.2062	0.916	0.8863	-27.387	-49.6725	1.0631	1.0252	-16.9155	-42.8258	1.2	1.1994	-6.84675	-50.7465	1.422	1.3971	-13.5592	-50.478	1.6491	1.6247	-21.2115	-48.5985
		30.8667		0.3639	0.3564	-6.30975	-15.036	0.3939	0.3895	-5.50425	-15.9757	0.4405	0.4317	-11.5455	-22.9567	0.5468	0.5319	-7.92075	-31.4145	0.5874	0.5713	-10.0688	-33.4282	0.6672	0.6518	-15.573	-32.0857	0.9166	0.8821	-26.5815	-55.311	1.0583	1.0277	-23.3595	-39.4695	1.2031	1.1983	-2.685	-52.2233	1.42	1.4008	-16.2442	-45.5108	1.6434	1.6304	-28.8638	-40.9462
		30.9333		0.3629	0.3577	-7.65225	-13.2907	0.3928	0.391	-6.981	-13.962	0.44	0.4341	-12.2168	-19.7347	0.5455	0.5368	-9.666	-24.8362	0.5876	0.5699	-9.80025	-35.3077	0.6671	0.6568	-15.7072	-25.3732	0.9151	0.8888	-28.5952	-46.3162	1.0646	1.0337	-14.9017	-31.4145	1.2064	1.2035	1.74525	-45.2423	1.4087	1.3945	-31.4145	-53.9685	1.6461	1.6243	-25.239	-49.1355
		31		0.3632	0.354	-7.2495	-18.258	0.3928	0.3874	-6.981	-18.795	0.4437	0.4328	-7.2495	-21.48	0.5461	0.5347	-8.8605	-27.6555	0.5878	0.5711	-9.53175	-33.6967	0.667	0.6516	-15.8415	-32.3542	0.9128	0.8867	-31.683	-49.1355	1.0626	1.0256	-17.5868	-42.2887	1.1982	1.197	-9.26325	-53.9685	1.4151	1.3962	-22.8225	-51.6863	1.6463	1.6248	-24.9705	-48.4643
		31.0667		0.3622	0.3552	-8.592	-16.647	0.3924	0.3898	-7.518	-15.573	0.444	0.4331	-6.84675	-21.0772	0.5498	0.5358	-3.89325	-26.1787	0.5872	0.571	-10.3372	-33.831	0.6682	0.6505	-14.2305	-33.831	0.9148	0.8897	-28.998	-45.108	1.0637	1.0277	-16.11	-39.4695	1.204	1.2038	-1.47675	-44.8395	1.4143	1.3966	-23.8965	-51.1492	1.6501	1.6174	-19.869	-58.3988
		31.1333		0.3623	0.3574	-8.45775	-13.6935	0.3945	0.39	-4.69875	-15.3045	0.443	0.4337	-8.18925	-20.2717	0.5446	0.5338	-10.8742	-28.8637	0.5883	0.5712	-8.8605	-33.5625	0.6666	0.6487	-16.3785	-36.2475	0.9219	0.8813	-19.4662	-56.385	1.0624	1.0256	-17.8552	-42.2887	1.2021	1.2009	-4.0275	-48.7327	1.4163	1.4052	-21.2115	-39.6038	1.6484	1.6225	-22.1512	-51.552
		31.2		0.364	0.3578	-6.1755	-13.1565	0.395	0.3901	-4.0275	-15.1703	0.4422	0.4348	-9.26325	-18.795	0.5499	0.5329	-3.759	-30.072	0.5901	0.5735	-6.444	-30.4747	0.6652	0.6541	-18.258	-28.998	0.9127	0.8881	-31.8173	-47.256	1.0566	1.0266	-25.6418	-40.9462	1.2001	1.1989	-6.7125	-51.4177	1.4166	1.3994	-20.8087	-47.3903	1.6508	1.6258	-18.9293	-47.1218
		31.2667		0.3635	0.3595	-6.84675	-10.8742	0.3951	0.3895	-3.89325	-15.9757	0.4404	0.4322	-11.6798	-22.2855	0.5453	0.5324	-9.9345	-30.7433	0.5891	0.5695	-7.7865	-35.8447	0.6678	0.6527	-14.7675	-30.8775	0.914	0.8859	-30.072	-50.2095	1.0602	1.0284	-20.8087	-38.5297	1.2008	1.2023	-5.77275	-46.8533	1.418	1.3959	-18.9292	-52.089	1.6451	1.6271	-26.5815	-45.3765
		31.3333		0.3626	0.3562	-8.055	-15.3045	0.3938	0.3893	-5.6385	-16.2443	0.4429	0.4333	-8.3235	-20.8087	0.5488	0.5353	-5.23575	-26.85	0.5879	0.5688	-9.3975	-36.7845	0.6674	0.6521	-15.3045	-31.683	0.9143	0.8887	-29.6692	-46.4505	1.057	1.0265	-25.1047	-41.0805	1.2009	1.2048	-5.6385	-43.497	1.4253	1.3994	-9.129	-47.3903	1.639	1.6233	-34.7708	-50.478
		31.4		0.3642	0.357	-5.907	-14.2305	0.3925	0.3896	-7.38375	-15.8415	0.4452	0.4332	-5.23575	-20.943	0.5459	0.5335	-9.129	-29.2665	0.5862	0.5702	-11.6797	-34.905	0.6683	0.6544	-14.0963	-28.5952	0.9147	0.8837	-29.1323	-53.163	1.0632	1.0273	-16.7813	-40.0065	1.201	1.2026	-5.50425	-46.4505	1.413	1.4045	-25.6417	-40.5435	1.6339	1.6342	-41.6175	-35.8448
		31.4667		0.3628	0.3594	-7.7865	-11.0085	0.3936	0.3893	-5.907	-16.2443	0.4419	0.4337	-9.666	-20.2717	0.5464	0.5329	-8.45775	-30.072	0.587	0.5705	-10.6057	-34.5022	0.6718	0.653	-9.3975	-30.4747	0.9167	0.8831	-26.4472	-53.9685	1.06	1.0247	-21.0773	-43.497	1.2004	1.1973	-6.30975	-53.5657	1.4187	1.3985	-17.9895	-48.5985	1.6397	1.6255	-33.831	-47.5245
		31.5333		0.3658	0.3599	-3.759	-10.3372	0.3908	0.39	-9.666	-15.3045	0.4425	0.4338	-8.8605	-20.1375	0.5465	0.5355	-8.3235	-26.5815	0.5893	0.5702	-7.518	-34.905	0.6663	0.6545	-16.7812	-28.461	0.9141	0.8887	-29.9377	-46.4505	1.0624	1.0204	-17.8552	-49.2697	1.2004	1.1964	-6.30975	-54.774	1.4161	1.399	-21.48	-47.9273	1.6369	1.6316	-37.59	-39.3353
		31.6		0.3632	0.3578	-7.2495	-13.1565	0.3923	0.3901	-7.65225	-15.1703	0.4409	0.4323	-11.0085	-22.1512	0.5458	0.5333	-9.26325	-29.535	0.5897	0.572	-6.981	-32.4885	0.6655	0.6507	-17.8552	-33.5625	0.9141	0.8903	-29.9377	-44.3025	1.0605	1.0234	-20.406	-45.2422	1.2014	1.1963	-4.96725	-54.9082	1.4184	1.3989	-18.3922	-48.0615	1.6402	1.635	-33.1598	-34.7708
		31.6667		0.3645	0.3579	-5.50425	-13.0222	0.3951	0.3895	-3.89325	-15.9757	0.4418	0.4324	-9.80025	-22.017	0.5491	0.5345	-4.833	-27.924	0.5883	0.5716	-8.8605	-33.0255	0.6665	0.6497	-16.5127	-34.905	0.9159	0.8871	-27.5212	-48.5985	1.0577	1.0269	-24.165	-40.5435	1.1999	1.1979	-6.981	-52.7603	1.413	1.3961	-25.6417	-51.8205	1.6489	1.6194	-21.48	-55.7138
		31.7333		0.3642	0.3583	-5.907	-12.4852	0.3928	0.3892	-6.981	-16.3785	0.4442	0.4335	-6.57825	-20.5402	0.5479	0.5381	-6.444	-23.091	0.5874	0.5704	-10.0688	-34.6365	0.6683	0.6454	-14.0963	-40.6777	0.9197	0.886	-22.4198	-50.0753	1.0567	1.0257	-25.5075	-42.1545	1.2027	1.1966	-3.222	-54.5055	1.4135	1.4018	-24.9705	-44.1683	1.6471	1.6287	-23.8965	-43.2285
		31.8		0.3622	0.3562	-8.592	-15.3045	0.3926	0.3889	-7.2495	-16.7812	0.4404	0.4351	-11.6798	-18.3922	0.5484	0.5364	-5.77275	-25.3733	0.5873	0.5702	-10.203	-34.905	0.6644	0.6476	-19.332	-37.7242	0.9125	0.8863	-32.0857	-49.6725	1.062	1.0303	-18.3922	-35.979	1.2007	1.1974	-5.907	-53.4315	1.4108	1.4028	-28.5952	-42.8258	1.6327	1.6279	-43.2285	-44.3025
		31.8667		0.3643	0.3576	-5.77275	-13.425	0.3918	0.3897	-8.3235	-15.7073	0.4409	0.4316	-11.0085	-23.091	0.5473	0.5346	-7.2495	-27.7898	0.5896	0.5732	-7.11525	-30.8775	0.666	0.6503	-17.184	-34.0995	0.9125	0.8822	-32.0857	-55.1768	1.0566	1.0239	-25.6418	-44.571	1.2012	1.1972	-5.23575	-53.7	1.4109	1.398	-28.461	-49.2698	1.6461	1.6271	-25.239	-45.3765
		31.9333		0.3623	0.3579	-8.45775	-13.0222	0.3932	0.3883	-6.444	-17.5868	0.4413	0.4343	-10.4715	-19.4662	0.5475	0.5382	-6.981	-22.9567	0.5906	0.57	-5.77275	-35.1735	0.6681	0.6475	-14.3647	-37.8585	0.914	0.8835	-30.072	-53.4315	1.0628	1.0296	-17.3183	-36.9187	1.1991	1.201	-8.055	-48.5985	1.4129	1.4014	-25.776	-44.7052	1.6517	1.6273	-17.721	-45.108
		32		0.3639	0.3558	-6.30975	-15.8415	0.3911	0.3901	-9.26325	-15.1703	0.4407	0.4344	-11.277	-19.332	0.5492	0.5354	-4.69875	-26.7158	0.5874	0.5705	-10.0688	-34.5022	0.6666	0.6511	-16.3785	-33.0255	0.9119	0.8846	-32.8912	-51.9547	1.0609	1.0224	-19.869	-46.5847	1.2025	1.1982	-3.4905	-52.3575	1.4107	1.4024	-28.7295	-43.3628	1.6379	1.6336	-36.2475	-36.6503
		32.0667		0.3623	0.356	-8.45775	-15.573	0.3943	0.3877	-4.96725	-18.3922	0.4419	0.4336	-9.666	-20.406	0.5478	0.5339	-6.57825	-28.7295	0.5886	0.5711	-8.45775	-33.6967	0.6692	0.649	-12.888	-35.8447	0.9125	0.8897	-32.0857	-45.108	1.0586	1.0261	-22.9568	-41.6175	1.1993	1.1977	-7.7865	-53.0287	1.4156	1.3943	-22.1512	-54.237	1.6497	1.619	-20.406	-56.2508
		32.1333		0.3635	0.3574	-6.84675	-13.6935	0.3957	0.3882	-3.08775	-17.721	0.4409	0.4333	-11.0085	-20.8087	0.546	0.5346	-8.99475	-27.7898	0.5884	0.569	-8.72625	-36.516	0.6678	0.653	-14.7675	-30.4747	0.9154	0.885	-28.1925	-51.4178	1.0579	1.0231	-23.8965	-45.645	1.1997	1.1954	-7.2495	-56.1165	1.4122	1.4023	-26.7158	-43.497	1.6462	1.6196	-25.1047	-55.4453
		32.2		0.3642	0.3588	-5.907	-11.814	0.3903	0.3899	-10.3373	-15.4387	0.4416	0.4352	-10.0688	-18.258	0.5476	0.5344	-6.84675	-28.0583	0.586	0.5708	-11.9482	-34.0995	0.6682	0.6552	-14.2305	-27.5212	0.9141	0.8894	-29.9377	-45.5108	1.0621	1.0264	-18.258	-41.2147	1.2028	1.2005	-3.08775	-49.2697	1.4182	1.3973	-18.6608	-50.2095	1.642	1.626	-30.7432	-46.8533
		32.2667		0.3651	0.3593	-4.69875	-11.1427	0.3945	0.3893	-4.69875	-16.2443	0.4414	0.433	-10.3373	-21.2115	0.549	0.5345	-4.96725	-27.924	0.59	0.5709	-6.57825	-33.9652	0.6656	0.6509	-17.721	-33.294	0.9172	0.8854	-25.776	-50.8808	1.0646	1.0316	-14.9017	-34.2337	1.2063	1.1998	1.611	-50.2095	1.4081	1.3981	-32.22	-49.1355	1.6477	1.6271	-23.091	-45.3765
		32.3333		0.3629	0.3592	-7.65225	-11.277	0.392	0.3891	-8.055	-16.5127	0.4384	0.4336	-14.3648	-20.406	0.5461	0.5318	-8.8605	-31.5487	0.5858	0.5709	-12.2168	-33.9652	0.6676	0.6492	-15.036	-35.5762	0.9145	0.8823	-29.4008	-55.0425	1.0604	1.0309	-20.5402	-35.1735	1.1978	1.199	-9.80025	-51.2835	1.423	1.4043	-12.2167	-40.812	1.6375	1.6193	-36.7845	-55.848
		32.4		0.3636	0.3579	-6.7125	-13.0222	0.3899	0.3896	-10.8742	-15.8415	0.4421	0.4331	-9.3975	-21.0772	0.5491	0.5349	-4.833	-27.387	0.5863	0.5708	-11.5455	-34.0995	0.6695	0.6504	-12.4852	-33.9652	0.9165	0.8845	-26.7157	-52.089	1.0578	1.026	-24.0307	-41.7517	1.2019	1.1996	-4.296	-50.478	1.4122	1.3994	-26.7158	-47.3903	1.6439	1.625	-28.1925	-48.1958
		32.4667		0.3633	0.3572	-7.11525	-13.962	0.3908	0.3907	-9.666	-14.3647	0.4433	0.4335	-7.7865	-20.5402	0.5479	0.533	-6.444	-29.9378	0.5877	0.5723	-9.666	-32.0857	0.6677	0.6525	-14.9018	-31.146	0.9189	0.8843	-23.4937	-52.3575	1.057	1.0208	-25.1047	-48.7327	1.2002	1.1976	-6.57825	-53.163	1.4185	1.4015	-18.258	-44.571	1.6405	1.624	-32.757	-49.5383
		32.5333		0.3625	0.3587	-8.18925	-11.9482	0.3921	0.3904	-7.92075	-14.7675	0.4403	0.4334	-11.814	-20.6745	0.5469	0.5329	-7.7865	-30.072	0.5877	0.5717	-9.666	-32.8913	0.6699	0.653	-11.9482	-30.4747	0.9291	0.8867	-9.80025	-49.1355	1.0629	1.0259	-17.184	-41.886	1.205	1.2014	-0.13425	-48.0615	1.4126	1.4061	-26.1787	-38.3955	1.6399	1.6254	-33.5625	-47.6588
		32.6		0.364	0.3581	-6.1755	-12.7538	0.3922	0.3884	-7.7865	-17.4525	0.4666	0.4317	23.4937	-22.9567	0.5484	0.5329	-5.77275	-30.072	0.5866	0.5711	-11.1427	-33.6967	0.6642	0.6529	-19.6005	-30.609	0.928	0.8815	-11.277	-56.1165	1.0593	1.0266	-22.017	-40.9462	1.1974	1.2019	-10.3373	-47.3903	1.413	1.3912	-25.6417	-58.3988	1.6381	1.6311	-35.979	-40.0065
		32.6667		0.3643	0.358	-5.77275	-12.888	0.3941	0.3892	-5.23575	-16.3785	0.4405	0.4345	-11.5455	-19.1977	0.5476	0.5327	-6.84675	-30.3405	0.5869	0.5716	-10.74	-33.0255	0.6672	0.6513	-15.573	-32.757	0.9301	0.8825	-8.45775	-54.774	1.0584	1.0247	-23.2252	-43.497	1.1993	1.1948	-7.7865	-56.922	1.4174	1.4041	-19.7347	-41.0805	1.6431	1.6234	-29.2665	-50.3438
		32.7333		0.3644	0.3554	-5.6385	-16.3785	0.3942	0.389	-5.1015	-16.647	0.4395	0.4325	-12.888	-21.8827	0.5489	0.5327	-5.1015	-30.3405	0.5864	0.5689	-11.4112	-36.6502	0.6656	0.6477	-17.721	-37.59	0.9185	0.8844	-24.0307	-52.2233	1.0594	1.0203	-21.8828	-49.404	1.1997	1.1923	-7.2495	-60.2783	1.4124	1.3966	-26.4472	-51.1492	1.6398	1.6238	-33.6968	-49.8068
		32.8		0.3622	0.3569	-8.592	-14.3648	0.3916	0.3892	-8.592	-16.3785	0.4437	0.4325	-7.2495	-21.8827	0.5492	0.5342	-4.69875	-28.3267	0.5881	0.5682	-9.129	-37.59	0.6705	0.6474	-11.1427	-37.9927	0.9195	0.8815	-22.6882	-56.1165	1.0587	1.0238	-22.8225	-44.7052	1.1975	1.1972	-10.203	-53.7	1.4148	1.4025	-23.2252	-43.2285	1.6513	1.6298	-18.258	-41.7518
		32.8667		0.3643	0.3577	-5.77275	-13.2907	0.3933	0.3873	-6.30975	-18.9293	0.4401	0.4323	-12.0825	-22.1512	0.5449	0.53	-10.4715	-33.9653	0.5857	0.5704	-12.351	-34.6365	0.6667	0.6522	-16.2443	-31.5487	0.9145	0.8845	-29.4008	-52.089	1.0591	1.0229	-22.2855	-45.9135	1.1966	1.1999	-11.4112	-50.0753	1.4143	1.3986	-23.8965	-48.4642	1.6422	1.6225	-30.4748	-51.552
		32.9333		0.366	0.3563	-3.4905	-15.1702	0.3915	0.3866	-8.72625	-19.869	0.4406	0.4358	-11.4113	-17.4525	0.5474	0.5328	-7.11525	-30.2062	0.5882	0.5675	-8.99475	-38.5297	0.6665	0.6543	-16.5127	-28.7295	0.9146	0.885	-29.2665	-51.4178	1.0557	1.0248	-26.85	-43.3628	1.2024	1.1966	-3.62475	-54.5055	1.4173	1.3965	-19.869	-51.2835	1.6458	1.6337	-25.6418	-36.516
		33		0.3645	0.3577	-5.50425	-13.2907	0.3923	0.3883	-7.65225	-17.5868	0.4391	0.4298	-13.425	-25.5075	0.545	0.5334	-10.3372	-29.4008	0.5862	0.5687	-11.6797	-36.9187	0.6662	0.6551	-16.9155	-27.6555	0.91	0.8832	-35.442	-53.8343	1.0622	1.023	-18.1237	-45.7793	1.2006	1.1967	-6.04125	-54.3712	1.412	1.3954	-26.9842	-52.7603	1.6367	1.6257	-37.8585	-47.256
		33.0667		0.3611	0.3566	-10.0688	-14.7675	0.3927	0.3885	-7.11525	-17.3183	0.4417	0.4314	-9.9345	-23.3595	0.5449	0.5326	-10.4715	-30.4748	0.5887	0.5688	-8.3235	-36.7845	0.6698	0.6566	-12.0825	-25.6418	0.9141	0.8803	-29.9377	-57.7275	1.0592	1.0208	-22.1513	-48.7327	1.2017	1.1988	-4.5645	-51.552	1.4137	1.4027	-24.702	-42.96	1.6506	1.6199	-19.1977	-55.0425
		33.1333		0.362	0.3575	-8.8605	-13.5592	0.3922	0.3882	-7.7865	-17.721	0.4397	0.4322	-12.6195	-22.2855	0.5474	0.5313	-7.11525	-32.22	0.5877	0.5709	-9.666	-33.9652	0.6676	0.6518	-15.036	-32.0857	0.9119	0.8817	-32.8912	-55.848	1.0627	1.0216	-17.4525	-47.6587	1.2006	1.2001	-6.04125	-49.8068	1.4184	1.4016	-18.3922	-44.4368	1.6337	1.6238	-41.886	-49.8068
		33.2		0.3622	0.3585	-8.592	-12.2167	0.3896	0.3869	-11.277	-19.4662	0.4395	0.4334	-12.888	-20.6745	0.5451	0.5342	-10.203	-28.3267	0.5858	0.5693	-12.2168	-36.1132	0.6642	0.6536	-19.6005	-29.6693	0.9144	0.8837	-29.535	-53.163	1.0617	1.023	-18.795	-45.7793	1.1989	1.1976	-8.3235	-53.163	1.407	1.3981	-33.6967	-49.1355	1.6431	1.619	-29.2665	-56.2508
		33.2667		0.3631	0.3587	-7.38375	-11.9482	0.3925	0.3897	-7.38375	-15.7073	0.4385	0.4339	-14.2305	-20.0032	0.5479	0.5303	-6.444	-33.5625	0.5889	0.5715	-8.055	-33.1597	0.6665	0.6517	-16.5127	-32.22	0.9152	0.8822	-28.461	-55.1768	1.059	1.0256	-22.4198	-42.2887	1.2003	1.1982	-6.444	-52.3575	1.4194	1.3978	-17.0497	-49.5383	1.6383	1.6216	-35.7105	-52.7603
		33.3333		0.3635	0.3557	-6.84675	-15.9758	0.3928	0.3903	-6.981	-14.9018	0.4405	0.4306	-11.5455	-24.4335	0.5473	0.533	-7.2495	-29.9378	0.5864	0.5703	-11.4112	-34.7707	0.6664	0.65	-16.647	-34.5022	0.9144	0.8851	-29.535	-51.2835	1.0612	1.0281	-19.4663	-38.9325	1.1957	1.1989	-12.6195	-51.4177	1.4133	1.3998	-25.239	-46.8533	1.6457	1.6206	-25.776	-54.1028
		33.4		0.3634	0.3569	-6.981	-14.3648	0.3904	0.3905	-10.203	-14.6332	0.4394	0.4312	-13.0222	-23.628	0.5501	0.5345	-3.4905	-27.924	0.5865	0.5732	-11.277	-30.8775	0.6679	0.6511	-14.6332	-33.0255	0.9123	0.8827	-32.3543	-54.5055	1.0578	1.0248	-24.0307	-43.3628	1.2005	1.1974	-6.1755	-53.4315	1.4106	1.3977	-28.8637	-49.6725	1.6444	1.6235	-27.5213	-50.2095
		33.4667		0.3636	0.3584	-6.7125	-12.351	0.3924	0.3887	-7.518	-17.0498	0.4427	0.4327	-8.592	-21.6142	0.5465	0.5327	-8.3235	-30.3405	0.5899	0.5683	-6.7125	-37.4557	0.671	0.6487	-10.4715	-36.2475	0.9181	0.8821	-24.5677	-55.311	1.0585	1.0261	-23.091	-41.6175	1.1989	1.1929	-8.3235	-59.4727	1.4144	1.3936	-23.7622	-55.1768	1.6369	1.626	-37.59	-46.8533
		33.5333		0.3653	0.3571	-4.43025	-14.0962	0.3941	0.3881	-5.23575	-17.8552	0.4404	0.4306	-11.6798	-24.4335	0.547	0.5349	-7.65225	-27.387	0.5883	0.5681	-8.8605	-37.7242	0.6621	0.6572	-22.4197	-24.8362	0.9138	0.8812	-30.3405	-56.5193	1.057	1.0253	-25.1047	-42.6915	1.1986	1.1973	-8.72625	-53.5657	1.4121	1.399	-26.85	-47.9273	1.6503	1.6204	-19.6005	-54.3713
		33.6		0.363	0.3548	-7.518	-17.184	0.3926	0.3894	-7.2495	-16.11	0.4419	0.4317	-9.666	-22.9567	0.5491	0.5338	-4.833	-28.8637	0.5869	0.571	-10.74	-33.831	0.6687	0.6498	-13.5593	-34.7707	0.9143	0.8829	-29.6692	-54.237	1.0576	1.0224	-24.2992	-46.5847	1.197	1.193	-10.8743	-59.3385	1.4112	1.3985	-28.0582	-48.5985	1.6474	1.6199	-23.4938	-55.0425
		33.6667		0.3633	0.3563	-7.11525	-15.1702	0.3911	0.3891	-9.26325	-16.5127	0.4399	0.4325	-12.351	-21.8827	0.5457	0.5307	-9.3975	-33.0255	0.5867	0.5694	-11.0085	-35.979	0.6681	0.6499	-14.3647	-34.6365	0.9165	0.8859	-26.7157	-50.2095	1.0675	1.0207	-11.0085	-48.867	1.2043	1.1991	-1.074	-51.1492	1.4173	1.3994	-19.869	-47.3903	1.6438	1.6202	-28.3268	-54.6398
		33.7333		0.3629	0.3559	-7.65225	-15.7072	0.3918	0.3882	-8.3235	-17.721	0.4426	0.4303	-8.72625	-24.8362	0.5462	0.5342	-8.72625	-28.3267	0.5869	0.5701	-10.74	-35.0392	0.6677	0.6498	-14.9018	-34.7707	0.9137	0.8888	-30.4748	-46.3162	1.0574	1.0248	-24.5678	-43.3628	1.1991	1.1945	-8.055	-57.3247	1.417	1.4091	-20.2717	-34.368	1.6485	1.6203	-22.017	-54.5055
		33.8		0.3624	0.3567	-8.3235	-14.6332	0.3937	0.3888	-5.77275	-16.9155	0.4579	0.4325	11.814	-21.8827	0.5459	0.5333	-9.129	-29.535	0.5878	0.5724	-9.53175	-31.9515	0.6683	0.6505	-14.0963	-33.831	0.9111	0.8807	-33.9652	-57.1905	1.0609	1.027	-19.869	-40.4092	1.1995	1.1967	-7.518	-54.3712	1.4181	1.4056	-18.795	-39.0668	1.6389	1.6237	-34.905	-49.941
		33.8667		0.3629	0.3564	-7.65225	-15.036	0.3908	0.3888	-9.666	-16.9155	0.4415	0.4297	-10.203	-25.6417	0.5456	0.5342	-9.53175	-28.3267	0.5876	0.5701	-9.80025	-35.0392	0.6639	0.6507	-20.0032	-33.5625	0.9182	0.8801	-24.4335	-57.996	1.0559	1.0301	-26.5815	-36.2475	1.1938	1.1939	-15.1703	-58.1303	1.417	1.4027	-20.2717	-42.96	1.6363	1.6236	-38.3955	-50.0753
		33.9333		0.3641	0.3541	-6.04125	-18.1237	0.3921	0.3878	-7.92075	-18.258	0.4406	0.4324	-11.4113	-22.017	0.5455	0.5326	-9.666	-30.4748	0.5871	0.5719	-10.4715	-32.6227	0.6637	0.6519	-20.2718	-31.9515	0.9144	0.8838	-29.535	-53.0287	1.0529	1.0226	-30.609	-46.3163	1.2021	1.1973	-4.0275	-53.5657	1.4128	1.4034	-25.9102	-42.0203	1.6463	1.6257	-24.9705	-47.256
		34		0.3628	0.3558	-7.7865	-15.8415	0.3927	0.3882	-7.11525	-17.721	0.4397	0.432	-12.6195	-22.554	0.5452	0.5367	-10.0687	-24.9705	0.5899	0.5718	-6.7125	-32.757	0.6647	0.6501	-18.9293	-34.368	0.9108	0.8842	-34.368	-52.4918	1.0589	1.0258	-22.554	-42.0202	1.1949	1.1968	-13.6935	-54.237	1.4129	1.3934	-25.776	-55.4453	1.6331	1.6272	-42.6915	-45.2423
		34.0667		0.363	0.3567	-7.518	-14.6332	0.3945	0.3892	-4.69875	-16.3785	0.4401	0.432	-12.0825	-22.554	0.5438	0.532	-11.9483	-31.2803	0.5866	0.5692	-11.1427	-36.2475	0.6699	0.6502	-11.9482	-34.2337	0.9145	0.8841	-29.4008	-52.626	1.0622	1.0221	-18.1237	-46.9875	1.2002	1.2002	-6.57825	-49.6725	1.4127	1.3973	-26.0445	-50.2095	1.6406	1.6262	-32.6227	-46.5847
		34.1333		0.3631	0.3586	-7.38375	-12.0825	0.3912	0.3898	-9.129	-15.573	0.4389	0.4334	-13.6935	-20.6745	0.5453	0.5321	-9.9345	-31.146	0.5861	0.5724	-11.814	-31.9515	0.6669	0.6483	-15.9757	-36.7845	0.9171	0.8827	-25.9102	-54.5055	1.0576	1.0196	-24.2992	-50.3437	1.1968	1.1948	-11.1427	-56.922	1.4083	1.3942	-31.9515	-54.3713	1.6418	1.6237	-31.0118	-49.941
		34.2		0.3637	0.3567	-6.57825	-14.6332	0.3934	0.3888	-6.1755	-16.9155	0.4399	0.4313	-12.351	-23.4937	0.5455	0.5309	-9.666	-32.757	0.5901	0.57	-6.444	-35.1735	0.6677	0.6522	-14.9018	-31.5487	0.9103	0.8842	-35.0393	-52.4918	1.0598	1.025	-21.3457	-43.0942	1.2033	1.1955	-2.4165	-55.9823	1.4175	1.3966	-19.6005	-51.1492	1.6404	1.6157	-32.8913	-60.681
		34.2667		0.3621	0.3573	-8.72625	-13.8277	0.3918	0.3891	-8.3235	-16.5127	0.4421	0.4307	-9.3975	-24.2992	0.5477	0.5326	-6.7125	-30.4748	0.5855	0.5732	-12.6195	-30.8775	0.6678	0.6512	-14.7675	-32.8912	0.9093	0.8846	-36.3818	-51.9547	1.0575	1.0232	-24.4335	-45.5107	1.1979	1.195	-9.666	-56.6535	1.4141	1.4018	-24.165	-44.1683	1.6423	1.618	-30.3405	-57.5933
		34.3333		0.364	0.3553	-6.1755	-16.5127	0.3913	0.3879	-8.99475	-18.1237	0.4406	0.4309	-11.4113	-24.0307	0.5466	0.534	-8.18925	-28.5953	0.5854	0.5682	-12.7537	-37.59	0.6656	0.6508	-17.721	-33.4282	0.9172	0.8833	-25.776	-53.7	1.0624	1.0241	-17.8552	-44.3025	1.1976	1.1947	-10.0688	-57.0562	1.4094	1.3927	-30.4747	-56.385	1.6433	1.6299	-28.998	-41.6175
		34.4		0.363	0.3544	-7.518	-17.721	0.3898	0.3881	-11.0085	-17.8552	0.4428	0.4322	-8.45775	-22.2855	0.5446	0.5308	-10.8742	-32.8912	0.5887	0.5708	-8.3235	-34.0995	0.6662	0.6463	-16.9155	-39.4695	0.9139	0.8828	-30.2062	-54.3712	1.0616	1.0222	-18.9292	-46.8532	1.2044	1.1976	-0.93975	-53.163	1.4145	1.4046	-23.628	-40.4092	1.6381	1.6218	-35.979	-52.4918
		34.4667		0.3623	0.3572	-8.45775	-13.962	0.3902	0.3885	-10.4715	-17.3183	0.4431	0.4296	-8.055	-25.776	0.5449	0.5325	-10.4715	-30.609	0.5893	0.5703	-7.518	-34.7707	0.6737	0.6451	-6.84675	-41.0805	0.9094	0.8875	-36.2475	-48.0615	1.0603	1.0207	-20.6745	-48.867	1.1986	1.2003	-8.72625	-49.5383	1.416	1.3991	-21.6142	-47.793	1.6402	1.619	-33.1598	-56.2508
		34.5333		0.362	0.3578	-8.8605	-13.1565	0.3914	0.3871	-8.8605	-19.1977	0.4421	0.4315	-9.3975	-23.2252	0.5465	0.5315	-8.3235	-31.9515	0.5906	0.5713	-5.77275	-33.4282	0.6659	0.648	-17.3182	-37.1872	0.9108	0.8887	-34.368	-46.4505	1.0629	1.023	-17.184	-45.7793	1.1991	1.198	-8.055	-52.626	1.4116	1.3976	-27.5213	-49.8068	1.6413	1.6229	-31.683	-51.015
		34.6		0.3626	0.3571	-8.055	-14.0962	0.393	0.3869	-6.7125	-19.4662	0.441	0.4298	-10.8743	-25.5075	0.5454	0.5329	-9.80025	-30.072	0.5865	0.5735	-11.277	-30.4747	0.6658	0.6472	-17.4525	-38.2612	0.9131	0.8796	-31.2802	-58.6672	1.0595	1.0244	-21.7485	-43.8997	1.1968	1.1951	-11.1427	-56.5192	1.4199	1.3996	-16.3785	-47.1218	1.6424	1.619	-30.2063	-56.2508
		34.6667		0.3626	0.3565	-8.055	-14.9017	0.3897	0.3893	-11.1428	-16.2443	0.4527	0.4289	4.833	-26.7157	0.5446	0.5339	-10.8742	-28.7295	0.5869	0.572	-10.74	-32.4885	0.6639	0.6495	-20.0032	-35.1735	0.9099	0.8828	-35.5762	-54.3712	1.0556	1.0217	-26.9842	-47.5245	1.2006	1.1958	-6.04125	-55.5795	1.4128	1.4018	-25.9102	-44.1683	1.64	1.6194	-33.4283	-55.7138
		34.7333		0.3608	0.3547	-10.4715	-17.3182	0.3912	0.3902	-9.129	-15.036	0.4411	0.4325	-10.74	-21.8827	0.5464	0.5335	-8.45775	-29.2665	0.5883	0.5684	-8.8605	-37.3215	0.6662	0.6486	-16.9155	-36.3818	0.9142	0.8824	-29.8035	-54.9082	1.0633	1.023	-16.647	-45.7793	1.2006	1.1953	-6.04125	-56.2508	1.4111	1.4023	-28.1925	-43.497	1.6422	1.6191	-30.4748	-56.1165
		34.8		0.3623	0.3561	-8.45775	-15.4387	0.3909	0.3888	-9.53175	-16.9155	0.4426	0.4304	-8.72625	-24.702	0.5477	0.5326	-6.7125	-30.4748	0.5896	0.5698	-7.11525	-35.442	0.6666	0.6524	-16.3785	-31.2802	0.9109	0.8844	-34.2337	-52.2233	1.0602	1.0185	-20.8087	-51.8205	1.1988	1.1901	-8.45775	-63.2318	1.4154	1.4018	-22.4197	-44.1683	1.6495	1.6155	-20.6745	-60.9495
		34.8667		0.363	0.3571	-7.518	-14.0962	0.3914	0.3869	-8.8605	-19.4662	0.4401	0.4313	-12.0825	-23.4937	0.5458	0.5316	-9.26325	-31.8173	0.5913	0.5724	-4.833	-31.9515	0.6682	0.6487	-14.2305	-36.2475	0.91	0.8809	-35.442	-56.922	1.0623	1.0208	-17.9895	-48.7327	1.1998	1.1945	-7.11525	-57.3247	1.4172	1.3989	-20.0032	-48.0615	1.6448	1.6174	-26.9843	-58.3988
		34.9333		0.3631	0.3563	-7.38375	-15.1702	0.3892	0.3868	-11.814	-19.6005	0.4414	0.4336	-10.3373	-20.406	0.5488	0.5342	-5.23575	-28.3267	0.5881	0.5693	-9.129	-36.1132	0.6659	0.652	-17.3182	-31.8172	0.9171	0.8783	-25.9102	-60.4125	1.0637	1.024	-16.11	-44.4367	1.2032	1.192	-2.55075	-60.681	1.4129	1.3992	-25.776	-47.6588	1.6432	1.6233	-29.1323	-50.478
		35		0.364	0.3563	-6.1755	-15.1702	0.3928	0.3874	-6.981	-18.795	0.444	0.4339	-6.84675	-20.0032	0.5471	0.5293	-7.518	-34.905	0.5865	0.5693	-11.277	-36.1132	0.6675	0.6576	-15.1703	-24.2993	0.9122	0.8814	-32.4885	-56.2507	1.0606	1.0235	-20.2718	-45.108	1.2001	1.1929	-6.7125	-59.4727	1.4104	1.4082	-29.1322	-35.5763	1.6405	1.6227	-32.757	-51.2835
		35.0667		0.3652	0.3579	-4.5645	-13.0222	0.3944	0.3896	-4.833	-15.8415	0.4406	0.434	-11.4113	-19.869	0.5448	0.5335	-10.6057	-29.2665	0.5886	0.5683	-8.45775	-37.4557	0.6656	0.6544	-17.721	-28.5952	0.9152	0.8814	-28.461	-56.2507	1.0598	1.022	-21.3457	-47.1217	1.2018	1.2005	-4.43025	-49.2697	1.4085	1.3998	-31.683	-46.8533	1.6417	1.6234	-31.146	-50.3438
		35.1333		0.362	0.3596	-8.8605	-10.74	0.395	0.3871	-4.0275	-19.1977	0.4411	0.4304	-10.74	-24.702	0.5466	0.5291	-8.18925	-35.1735	0.5894	0.5702	-7.38375	-34.905	0.6683	0.6527	-14.0963	-30.8775	0.916	0.8798	-27.387	-58.3987	1.0553	1.0227	-27.387	-46.182	1.2008	1.1947	-5.77275	-57.0562	1.4133	1.3943	-25.239	-54.237	1.6447	1.6186	-27.1185	-56.7877
		35.2		0.3642	0.3558	-5.907	-15.8415	0.3934	0.3873	-6.1755	-18.9293	0.44	0.4321	-12.2168	-22.4197	0.5473	0.5336	-7.2495	-29.1323	0.5889	0.568	-8.055	-37.8585	0.6676	0.649	-15.036	-35.8447	0.9122	0.8847	-32.4885	-51.8205	1.0635	1.0199	-16.3785	-49.941	1.1991	1.1921	-8.055	-60.5468	1.4173	1.3959	-19.869	-52.089	1.6424	1.6163	-30.2063	-59.8755
		35.2667		0.3619	0.3576	-8.99475	-13.425	0.3924	0.3894	-7.518	-16.11	0.4407	0.434	-11.277	-19.869	0.5483	0.5334	-5.907	-29.4008	0.5875	0.5685	-9.9345	-37.1872	0.6659	0.6514	-17.3182	-32.6227	0.9184	0.8845	-24.165	-52.089	1.0614	1.0223	-19.1978	-46.719	1.1995	1.1944	-7.518	-57.459	1.4114	1.3988	-27.7897	-48.1958	1.6398	1.6219	-33.6968	-52.3575
		35.3333		0.3652	0.3552	-4.5645	-16.647	0.3924	0.3877	-7.518	-18.3922	0.4403	0.4316	-11.814	-23.091	0.545	0.532	-10.3372	-31.2803	0.5857	0.5704	-12.351	-34.6365	0.6641	0.6493	-19.7347	-35.442	0.9147	0.8848	-29.1323	-51.6862	1.0614	1.0215	-19.1978	-47.793	1.2002	1.1946	-6.57825	-57.1905	1.414	1.3987	-24.2992	-48.33	1.6397	1.6205	-33.831	-54.237
		35.4		0.3634	0.3558	-6.981	-15.8415	0.3931	0.3897	-6.57825	-15.7073	0.4417	0.4311	-9.9345	-23.7622	0.5457	0.5293	-9.3975	-34.905	0.5854	0.5681	-12.7537	-37.7242	0.665	0.647	-18.5265	-38.5297	0.9185	0.8806	-24.0307	-57.3247	1.0588	1.0196	-22.6882	-50.3437	1.2003	1.1938	-6.444	-58.2645	1.4141	1.4029	-24.165	-42.6915	1.6447	1.6198	-27.1185	-55.1768
		35.4667		0.3645	0.3542	-5.50425	-17.9895	0.3923	0.3891	-7.65225	-16.5127	0.4419	0.4309	-9.666	-24.0307	0.5438	0.5322	-11.9483	-31.0118	0.5849	0.5706	-13.425	-34.368	0.6637	0.6492	-20.2718	-35.5762	0.9169	0.8799	-26.1787	-58.2645	1.056	1.0224	-26.4472	-46.5847	1.2074	1.19	3.08775	-63.366	1.4142	1.3958	-24.0308	-52.2233	1.6425	1.6231	-30.072	-50.7465
		35.5333		0.363	0.3562	-7.518	-15.3045	0.3919	0.388	-8.18925	-17.9895	0.4405	0.431	-11.5455	-23.8965	0.5463	0.533	-8.592	-29.9378	0.5851	0.5707	-13.1565	-34.2337	0.6649	0.6497	-18.6607	-34.905	0.9143	0.8786	-29.6692	-60.0097	1.0565	1.0199	-25.776	-49.941	1.199	1.2052	-8.18925	-42.96	1.4095	1.401	-30.3405	-45.2423	1.6392	1.632	-34.5023	-38.7983
		35.6		0.3644	0.3556	-5.6385	-16.11	0.3923	0.3912	-7.65225	-13.6935	0.4448	0.431	-5.77275	-23.8965	0.5442	0.5312	-11.4112	-32.3542	0.5864	0.5733	-11.4112	-30.7432	0.6674	0.6468	-15.3045	-38.7982	0.9168	0.8803	-26.313	-57.7275	1.0609	1.0212	-19.869	-48.1957	1.1958	1.197	-12.4853	-53.9685	1.4109	1.3957	-28.461	-52.3575	1.645	1.6244	-26.7158	-49.0013
		35.6667		0.3647	0.3577	-5.23575	-13.2907	0.3919	0.3879	-8.18925	-18.1237	0.4384	0.4329	-14.3648	-21.3457	0.5476	0.5352	-6.84675	-26.9842	0.5866	0.5702	-11.1427	-34.905	0.6654	0.645	-17.9895	-41.2147	0.913	0.8826	-31.4145	-54.6398	1.0588	1.0216	-22.6882	-47.6587	1.2043	1.197	-1.074	-53.9685	1.4132	1.3986	-25.3732	-48.4642	1.6354	1.6166	-39.6038	-59.4727
		35.7333		0.3655	0.358	-4.16175	-12.888	0.3925	0.3882	-7.38375	-17.721	0.4401	0.4316	-12.0825	-23.091	0.5456	0.5308	-9.53175	-32.8912	0.588	0.5679	-9.26325	-37.9927	0.6713	0.6505	-10.0688	-33.831	0.9154	0.8793	-28.1925	-59.07	1.0583	1.0185	-23.3595	-51.8205	1.1953	1.1924	-13.1565	-60.144	1.4154	1.3968	-22.4197	-50.8808	1.6429	1.6162	-29.535	-60.0098
		35.8		0.365	0.357	-4.833	-14.2305	0.3919	0.3894	-8.18925	-16.11	0.4392	0.4302	-13.2908	-24.9705	0.5478	0.5327	-6.57825	-30.3405	0.5869	0.5694	-10.74	-35.979	0.6657	0.6467	-17.5868	-38.9325	0.9095	0.8786	-36.1132	-60.0097	1.0609	1.0186	-19.869	-51.6862	1.2047	1.199	-0.537	-51.2835	1.4183	1.3982	-18.5265	-49.0013	1.6443	1.6186	-27.6555	-56.7877
		35.8667		0.3609	0.3573	-10.3372	-13.8277	0.3947	0.3871	-4.43025	-19.1977	0.4425	0.4276	-8.8605	-28.461	0.5454	0.5344	-9.80025	-28.0583	0.5867	0.568	-11.0085	-37.8585	0.6637	0.6449	-20.2718	-41.349	0.9117	0.882	-33.1598	-55.4452	1.0575	1.0252	-24.4335	-42.8258	1.2037	1.1962	-1.8795	-55.0425	1.412	1.3995	-26.9842	-47.256	1.6452	1.6206	-26.4473	-54.1028
		35.9333		0.3641	0.3573	-6.04125	-13.8277	0.3931	0.3884	-6.57825	-17.4525	0.4417	0.4314	-9.9345	-23.3595	0.5473	0.5328	-7.2495	-30.2062	0.5866	0.5702	-11.1427	-34.905	0.6673	0.6444	-15.4388	-42.0202	0.9163	0.8826	-26.9842	-54.6398	1.0576	1.0226	-24.2992	-46.3163	1.1981	1.185	-9.3975	-70.0785	1.4147	1.3964	-23.3595	-51.4178	1.6423	1.6347	-30.3405	-35.1735
		36		0.3655	0.3553	-4.16175	-16.5127	0.3929	0.3856	-6.84675	-21.2115	0.4415	0.4307	-10.203	-24.2992	0.5442	0.5327	-11.4112	-30.3405	0.587	0.5668	-10.6057	-39.4695	0.6681	0.6443	-14.3647	-42.1545	0.9102	0.8846	-35.1735	-51.9547	1.0643	1.0185	-15.3045	-51.8205	1.2042	1.201	-1.20825	-48.5985	1.414	1.3898	-24.2992	-60.2783	1.6437	1.6237	-28.461	-49.941
		36.0667		0.3632	0.3559	-7.2495	-15.7072	0.3918	0.3903	-8.3235	-14.9018	0.4426	0.4311	-8.72625	-23.7622	0.5451	0.5312	-10.203	-32.3542	0.5875	0.5655	-9.9345	-41.2147	0.6665	0.6459	-16.5127	-40.0065	0.9131	0.883	-31.2802	-54.1028	1.0575	1.0213	-24.4335	-48.0615	1.2004	1.1957	-6.30975	-55.7137	1.4148	1.393	-23.2252	-55.9823	1.6365	1.6227	-38.127	-51.2835
		36.1333		0.3633	0.3573	-7.11525	-13.8277	0.3907	0.3899	-9.80025	-15.4387	0.4424	0.4306	-8.99475	-24.4335	0.5449	0.5296	-10.4715	-34.5023	0.5875	0.5687	-9.9345	-36.9187	0.6669	0.6459	-15.9757	-40.0065	0.9137	0.8826	-30.4748	-54.6398	1.059	1.0213	-22.4198	-48.0615	1.2044	1.1939	-0.93975	-58.1303	1.4153	1.3974	-22.554	-50.0753	1.6359	1.6229	-38.9325	-51.015
		36.2		0.3623	0.3589	-8.45775	-11.6798	0.3905	0.3887	-10.0688	-17.0498	0.4403	0.4314	-11.814	-23.3595	0.5445	0.5295	-11.0085	-34.6365	0.5894	0.5706	-7.38375	-34.368	0.6674	0.6476	-15.3045	-37.7242	0.9173	0.8906	-25.6418	-43.8998	1.0639	1.0244	-15.8415	-43.8997	1.201	1.1926	-5.50425	-59.8755	1.41	1.3949	-29.6692	-53.4315	1.6391	1.6193	-34.6365	-55.848
		36.2667		0.3631	0.3563	-7.38375	-15.1702	0.3916	0.3894	-8.592	-16.11	0.4399	0.4314	-12.351	-23.3595	0.5432	0.5284	-12.7537	-36.1133	0.5873	0.5715	-10.203	-33.1597	0.6673	0.6498	-15.4388	-34.7707	0.9169	0.8795	-26.1787	-58.8015	1.0548	1.0214	-28.0583	-47.9272	1.198	1.1922	-9.53175	-60.4125	1.4152	1.3989	-22.6882	-48.0615	1.6387	1.6228	-35.1735	-51.1493
		36.3333		0.3637	0.3551	-6.57825	-16.7812	0.3922	0.3892	-7.7865	-16.3785	0.4415	0.4303	-10.203	-24.8362	0.5481	0.5302	-6.1755	-33.6967	0.5883	0.5696	-8.8605	-35.7105	0.6688	0.6443	-13.425	-42.1545	0.9131	0.8838	-31.2802	-53.0287	1.0623	1.0236	-17.9895	-44.9737	1.1955	1.1915	-12.888	-61.3522	1.4145	1.3931	-23.628	-55.848	1.6391	1.6197	-34.6365	-55.311
		36.4		0.3614	0.3543	-9.666	-17.8552	0.3933	0.3886	-6.30975	-17.184	0.4405	0.4294	-11.5455	-26.0445	0.5458	0.5334	-9.26325	-29.4008	0.5879	0.5694	-9.3975	-35.979	0.6663	0.6424	-16.7812	-44.7052	0.9116	0.8782	-33.294	-60.5468	1.062	1.023	-18.3922	-45.7793	1.1947	1.1946	-13.962	-57.1905	1.409	1.3921	-31.0117	-57.1905	1.6414	1.6206	-31.5488	-54.1028
		36.4667		0.3628	0.3549	-7.7865	-17.0498	0.394	0.3871	-5.37	-19.1977	0.4442	0.4298	-6.57825	-25.5075	0.5443	0.5289	-11.277	-35.442	0.5877	0.571	-9.666	-33.831	0.6674	0.6455	-15.3045	-40.5435	0.9159	0.8826	-27.5212	-54.6398	1.056	1.0198	-26.4472	-50.0752	1.1971	1.1966	-10.74	-54.5055	1.4185	1.393	-18.258	-55.9823	1.6466	1.619	-24.5678	-56.2508
		36.5333		0.3671	0.3535	-2.01375	-18.9292	0.3931	0.3882	-6.57825	-17.721	0.4427	0.4327	-8.592	-21.6142	0.5484	0.5311	-5.77275	-32.4885	0.5874	0.5689	-10.0688	-36.6502	0.6632	0.6467	-20.943	-38.9325	0.9156	0.8838	-27.924	-53.0287	1.0539	1.0245	-29.2665	-43.7655	1.1956	1.1946	-12.7538	-57.1905	1.4101	1.3915	-29.535	-57.996	1.6439	1.6227	-28.1925	-51.2835
		36.6		0.364	0.3542	-6.1755	-17.9895	0.3925	0.3871	-7.38375	-19.1977	0.44	0.4345	-12.2168	-19.1977	0.5449	0.5328	-10.4715	-30.2062	0.5859	0.5686	-12.0825	-37.053	0.6651	0.6469	-18.3922	-38.664	0.9142	0.8808	-29.8035	-57.0562	1.061	1.0224	-19.7348	-46.5847	1.2035	1.1986	-2.148	-51.8205	1.4169	1.3975	-20.406	-49.941	1.6417	1.6149	-31.146	-61.755
		36.6667		0.361	0.3568	-10.203	-14.499	0.3911	0.3866	-9.26325	-19.869	0.4452	0.4303	-5.23575	-24.8362	0.5487	0.5313	-5.37	-32.22	0.5824	0.57	-16.7812	-35.1735	0.6687	0.6463	-13.5593	-39.4695	0.9146	0.881	-29.2665	-56.7877	1.061	1.0216	-19.7348	-47.6587	1.1973	1.1986	-10.4715	-51.8205	1.413	1.3954	-25.6417	-52.7603	1.6405	1.6133	-32.757	-63.903
		36.7333		0.3615	0.3554	-9.53175	-16.3785	0.393	0.3865	-6.7125	-20.0032	0.4407	0.4307	-11.277	-24.2992	0.5462	0.531	-8.72625	-32.6227	0.5881	0.5679	-9.129	-37.9927	0.6628	0.644	-21.48	-42.5572	0.9201	0.8778	-21.8827	-61.0838	1.0559	1.0184	-26.5815	-51.9547	1.2039	1.1971	-1.611	-53.8342	1.4188	1.3969	-17.8552	-50.7465	1.6441	1.6197	-27.924	-55.311
		36.8		0.3631	0.3544	-7.38375	-17.721	0.3922	0.3873	-7.7865	-18.9293	0.4402	0.4299	-11.9483	-25.3732	0.5459	0.5294	-9.129	-34.7708	0.5849	0.5698	-13.425	-35.442	0.6646	0.6457	-19.0635	-40.275	0.9108	0.8798	-34.368	-58.3987	1.0607	1.0209	-20.1375	-48.5985	1.1976	1.1962	-10.0688	-55.0425	1.4155	1.3947	-22.2855	-53.7	1.6372	1.6257	-37.1872	-47.256
		36.8667		0.3623	0.3557	-8.45775	-15.9758	0.3923	0.3876	-7.65225	-18.5265	0.4401	0.4288	-12.0825	-26.85	0.5502	0.5285	-3.35625	-35.979	0.5885	0.5671	-8.592	-39.0667	0.6627	0.6493	-21.6143	-35.442	0.9148	0.8798	-28.998	-58.3987	1.0578	1.0227	-24.0307	-46.182	1.1981	1.1955	-9.3975	-55.9823	1.4139	1.3917	-24.4335	-57.7275	1.6469	1.6168	-24.165	-59.2043
		36.9333		0.3637	0.3565	-6.57825	-14.9017	0.3901	0.3879	-10.6058	-18.1237	0.441	0.4309	-10.8743	-24.0307	0.5442	0.5283	-11.4112	-36.2475	0.5873	0.5675	-10.203	-38.5297	0.6658	0.6457	-17.4525	-40.275	0.9114	0.8766	-33.5625	-62.6947	1.0559	1.0251	-26.5815	-42.96	1.2009	1.193	-5.6385	-59.3385	1.4096	1.3977	-30.2062	-49.6725	1.638	1.6196	-36.1133	-55.4453
		37		0.3624	0.3562	-8.3235	-15.3045	0.3898	0.3865	-11.0085	-20.0032	0.4422	0.4327	-9.26325	-21.6142	0.5427	0.5292	-13.425	-35.0393	0.5877	0.5662	-9.666	-40.275	0.669	0.6479	-13.1565	-37.3215	0.917	0.8777	-26.0445	-61.218	1.0578	1.0215	-24.0307	-47.793	1.2008	1.1963	-5.77275	-54.9082	1.4133	1.3963	-25.239	-51.552	1.6385	1.6108	-35.442	-67.2593
		37.0667		0.3634	0.3543	-6.981	-17.8552	0.3918	0.3861	-8.3235	-20.5403	0.4416	0.4288	-10.0688	-26.85	0.546	0.5334	-8.99475	-29.4008	0.5879	0.5657	-9.3975	-40.9462	0.6636	0.6465	-20.406	-39.201	0.9163	0.884	-26.9842	-52.7603	1.0573	1.0229	-24.702	-45.9135	1.2013	1.195	-5.1015	-56.6535	1.4094	1.3974	-30.4747	-50.0753	1.6393	1.6225	-34.368	-51.552
		37.1333		0.3623	0.3566	-8.45775	-14.7675	0.3924	0.3865	-7.518	-20.0032	0.4412	0.4278	-10.6058	-28.1925	0.5473	0.5311	-7.2495	-32.4885	0.5849	0.5666	-13.425	-39.738	0.6643	0.6493	-19.4663	-35.442	0.9098	0.8792	-35.7105	-59.2043	1.0599	1.017	-21.2115	-53.8343	1.2009	1.1917	-5.6385	-61.0838	1.4112	1.3923	-28.0582	-56.922	1.6455	1.6173	-26.0445	-58.533
		37.2		0.3628	0.3557	-7.7865	-15.9758	0.395	0.3884	-4.0275	-17.4525	0.4402	0.4312	-11.9483	-23.628	0.5454	0.5287	-9.80025	-35.7105	0.5874	0.5705	-10.0688	-34.5022	0.6648	0.65	-18.795	-34.5022	0.911	0.8793	-34.0995	-59.07	1.0639	1.0202	-15.8415	-49.5382	1.1921	1.1935	-17.4525	-58.6672	1.4156	1.3911	-22.1512	-58.533	1.6444	1.6099	-27.5213	-68.4675
		37.2667		0.3625	0.355	-8.18925	-16.9155	0.3935	0.3876	-6.04125	-18.5265	0.4398	0.4282	-12.4853	-27.6555	0.5454	0.5302	-9.80025	-33.6967	0.5894	0.5687	-7.38375	-36.9187	0.6654	0.6495	-17.9895	-35.1735	0.9118	0.8801	-33.0255	-57.996	1.0607	1.0204	-20.1375	-49.2697	1.2	1.1902	-6.84675	-63.0975	1.4125	1.3994	-26.313	-47.3903	1.6442	1.6212	-27.7897	-53.2973
		37.3333		0.3617	0.3583	-9.26325	-12.4852	0.3924	0.3874	-7.518	-18.795	0.4406	0.4294	-11.4113	-26.0445	0.5438	0.5304	-11.9483	-33.4283	0.5892	0.5691	-7.65225	-36.3817	0.6642	0.6452	-19.6005	-40.9462	0.9119	0.881	-32.8912	-56.7877	1.0618	1.0219	-18.6607	-47.256	1.1972	1.1978	-10.6058	-52.8945	1.4161	1.3961	-21.48	-51.8205	1.6496	1.6175	-20.5403	-58.2645
		37.4		0.3621	0.3555	-8.72625	-16.2442	0.3911	0.3859	-9.26325	-20.8087	0.4398	0.4338	-12.4853	-20.1375	0.5495	0.5338	-4.296	-28.8637	0.5894	0.5661	-7.38375	-40.4092	0.6635	0.6452	-20.5403	-40.9462	0.9187	0.879	-23.7622	-59.4727	1.0547	1.0238	-28.1925	-44.7052	1.2025	1.1881	-3.4905	-65.9168	1.4184	1.3908	-18.3922	-58.9358	1.6456	1.6214	-25.9103	-53.0288
		37.4667		0.3611	0.3556	-10.0688	-16.11	0.3922	0.3886	-7.7865	-17.184	0.4417	0.4306	-9.9345	-24.4335	0.548	0.5281	-6.30975	-36.516	0.5891	0.5686	-7.7865	-37.053	0.6665	0.6431	-16.5127	-43.7655	0.9157	0.8854	-27.7898	-50.8808	1.0576	1.0196	-24.2992	-50.3437	1.1976	1.1899	-10.0688	-63.5003	1.4212	1.3938	-14.6332	-54.9083	1.6492	1.6211	-21.0773	-53.4315
		37.5333		0.3609	0.3543	-10.3372	-17.8552	0.3921	0.3877	-7.92075	-18.3922	0.4402	0.4318	-11.9483	-22.8225	0.5481	0.5299	-6.1755	-34.0995	0.5913	0.5705	-4.833	-34.5022	0.6656	0.6441	-17.721	-42.423	0.9142	0.8804	-29.8035	-57.5933	1.059	1.0185	-22.4198	-51.8205	1.1993	1.1961	-7.7865	-55.1768	1.4172	1.3969	-20.0032	-50.7465	1.6393	1.6249	-34.368	-48.33
		37.6		0.3626	0.3557	-8.055	-15.9758	0.3927	0.3886	-7.11525	-17.184	0.4396	0.4283	-12.7538	-27.5212	0.5477	0.5283	-6.7125	-36.2475	0.5888	0.5692	-8.18925	-36.2475	0.6637	0.6483	-20.2718	-36.7845	0.9184	0.8802	-24.165	-57.8618	1.0635	1.0223	-16.3785	-46.719	1.1963	1.1936	-11.814	-58.533	1.4088	1.3935	-31.2802	-55.311	1.6342	1.6165	-41.2148	-59.607
		37.6667		0.3645	0.3571	-5.50425	-14.0962	0.3925	0.3881	-7.38375	-17.8552	0.4435	0.4295	-7.518	-25.9102	0.5471	0.5276	-7.518	-37.1873	0.5888	0.567	-8.18925	-39.201	0.6644	0.6547	-19.332	-28.1925	0.9143	0.8759	-29.6692	-63.6345	1.0582	1.0188	-23.4937	-51.4177	1.1979	1.1897	-9.666	-63.7687	1.4112	1.3955	-28.0582	-52.626	1.6386	1.6154	-35.3077	-61.0838
		37.7333		0.3617	0.3562	-9.26325	-15.3045	0.3919	0.386	-8.18925	-20.6745	0.4417	0.4311	-9.9345	-23.7622	0.5467	0.5328	-8.055	-30.2062	0.5849	0.5676	-13.425	-38.3955	0.6641	0.6511	-19.7347	-33.0255	0.9159	0.8759	-27.5212	-63.6345	1.0615	1.0205	-19.0635	-49.1355	1.1962	1.1946	-11.9483	-57.1905	1.4177	1.4015	-19.332	-44.571	1.6373	1.6098	-37.053	-68.6018
		37.8		0.3646	0.354	-5.37	-18.258	0.3928	0.3902	-6.981	-15.036	0.4431	0.4282	-8.055	-27.6555	0.5487	0.5326	-5.37	-30.4748	0.5848	0.5668	-13.5593	-39.4695	0.6654	0.6454	-17.9895	-40.6777	0.9126	0.8788	-31.9515	-59.7412	1.0641	1.023	-15.573	-45.7793	1.1983	1.193	-9.129	-59.3385	1.4085	1.3916	-31.683	-57.8618	1.642	1.615	-30.7432	-61.6208
		37.8667		0.3615	0.3578	-9.53175	-13.1565	0.3898	0.3875	-11.0085	-18.6608	0.4415	0.4321	-10.203	-22.4197	0.5472	0.528	-7.38375	-36.6503	0.5876	0.5675	-9.80025	-38.5297	0.6662	0.6473	-16.9155	-38.127	0.9124	0.8764	-32.22	-62.9633	1.0597	1.02	-21.48	-49.8067	1.2059	1.1919	1.074	-60.8153	1.4122	1.386	-26.7158	-65.3798	1.6376	1.6144	-36.6503	-62.4262
		37.9333		0.3637	0.3557	-6.57825	-15.9758	0.3923	0.3892	-7.65225	-16.3785	0.4392	0.4321	-13.2908	-22.4197	0.5458	0.5328	-9.26325	-30.2062	0.5855	0.5681	-12.6195	-37.7242	0.6645	0.6454	-19.1977	-40.6777	0.9115	0.8815	-33.4282	-56.1165	1.0579	1.0233	-23.8965	-45.3765	1.203	1.1925	-2.81925	-60.0097	1.4149	1.3951	-23.091	-53.163	1.6417	1.6188	-31.146	-56.5193
		38		0.3632	0.3562	-7.2495	-15.3045	0.3905	0.3859	-10.0688	-20.8087	0.4407	0.4311	-11.277	-23.7622	0.5462	0.5311	-8.72625	-32.4885	0.5866	0.5659	-11.1427	-40.6777	0.6662	0.6427	-16.9155	-44.3025	0.9144	0.8773	-29.535	-61.755	1.0564	1.0226	-25.9102	-46.3163	1.1996	1.1957	-7.38375	-55.7137	1.4142	1.4018	-24.0308	-44.1683	1.6465	1.6164	-24.702	-59.7413
		38.0667		0.3613	0.3545	-9.80025	-17.5867	0.3924	0.3869	-7.518	-19.4662	0.4397	0.4299	-12.6195	-25.3732	0.5491	0.533	-4.833	-29.9378	0.5869	0.5655	-10.74	-41.2147	0.6654	0.6427	-17.9895	-44.3025	0.9148	0.8807	-28.998	-57.1905	1.0583	1.0258	-23.3595	-42.0202	1.1949	1.1937	-13.6935	-58.3987	1.4161	1.393	-21.48	-55.9823	1.6433	1.6257	-28.998	-47.256
		38.1333		0.3616	0.357	-9.3975	-14.2305	0.3907	0.3917	-9.80025	-13.0222	0.4399	0.4287	-12.351	-26.9842	0.5453	0.529	-9.9345	-35.3078	0.5861	0.5698	-11.814	-35.442	0.6675	0.649	-15.1703	-35.8447	0.9128	0.8839	-31.683	-52.8945	1.0576	1.0242	-24.2992	-44.1682	1.1957	1.1955	-12.6195	-55.9823	1.4154	1.3941	-22.4197	-54.5055	1.6428	1.6141	-29.6693	-62.829
		38.2		0.3649	0.358	-4.96725	-12.888	0.3904	0.3948	-10.203	-8.8605	0.4395	0.43	-12.888	-25.239	0.5464	0.5294	-8.45775	-34.7708	0.5831	0.5669	-15.8415	-39.3352	0.6674	0.6491	-15.3045	-35.7105	0.9126	0.8816	-31.9515	-55.9823	1.0585	1.0208	-23.091	-48.7327	1.196	1.1932	-12.2168	-59.07	1.4125	1.3871	-26.313	-63.903	1.6426	1.6186	-29.9378	-56.7877
		38.2667		0.3613	0.3548	-9.80025	-17.184	0.3923	0.3896	-7.65225	-15.8415	0.4414	0.4314	-10.3373	-23.3595	0.5442	0.5305	-11.4112	-33.294	0.588	0.5661	-9.26325	-40.4092	0.6668	0.6492	-16.11	-35.5762	0.9095	0.8798	-36.1132	-58.3987	1.0565	1.0197	-25.776	-50.2095	1.2004	1.1924	-6.30975	-60.144	1.4158	1.3976	-21.8827	-49.8068	1.646	1.619	-25.3733	-56.2508
		38.3333		0.3643	0.3555	-5.77275	-16.2442	0.392	0.3874	-8.055	-18.795	0.4413	0.4311	-10.4715	-23.7622	0.5457	0.5298	-9.3975	-34.2337	0.5845	0.5671	-13.962	-39.0667	0.6667	0.6505	-16.2443	-33.831	0.9123	0.8802	-32.3543	-57.8618	1.0599	1.0221	-21.2115	-46.9875	1.2009	1.1974	-5.6385	-53.4315	1.4162	1.3948	-21.3458	-53.5658	1.6364	1.6188	-38.2613	-56.5193
		38.4		0.3617	0.3576	-9.26325	-13.425	0.3902	0.3886	-10.4715	-17.184	0.4396	0.431	-12.7538	-23.8965	0.546	0.532	-8.99475	-31.2803	0.5835	0.567	-15.3045	-39.201	0.6669	0.6462	-15.9757	-39.6037	0.913	0.8772	-31.4145	-61.8893	1.0605	1.0184	-20.406	-51.9547	1.1976	1.1929	-10.0688	-59.4727	1.4137	1.3926	-24.702	-56.5193	1.6362	1.6129	-38.5298	-64.44
		38.4667		0.3628	0.3562	-7.7865	-15.3045	0.3925	0.3866	-7.38375	-19.869	0.4392	0.4307	-13.2908	-24.2992	0.5461	0.5294	-8.8605	-34.7708	0.5871	0.5684	-10.4715	-37.3215	0.6683	0.6421	-14.0963	-45.108	0.9125	0.8818	-32.0857	-55.7137	1.0592	1.0207	-22.1513	-48.867	1.1996	1.189	-7.38375	-64.7085	1.411	1.39	-28.3267	-60.0098	1.6413	1.6254	-31.683	-47.6588
		38.5333		0.363	0.3572	-7.518	-13.962	0.393	0.3869	-6.7125	-19.4662	0.4494	0.4288	0.40275	-26.85	0.5441	0.5309	-11.5455	-32.757	0.5851	0.5668	-13.1565	-39.4695	0.6712	0.6413	-10.203	-46.182	0.9164	0.8784	-26.85	-60.2783	1.0606	1.0201	-20.2718	-49.6725	1.1983	1.1944	-9.129	-57.459	1.4083	1.3915	-31.9515	-57.996	1.6447	1.6123	-27.1185	-65.2455
		38.6		0.3614	0.3549	-9.666	-17.0498	0.3913	0.3867	-8.99475	-19.7347	0.4402	0.4293	-11.9483	-26.1787	0.5463	0.5335	-8.592	-29.2665	0.5868	0.5664	-10.8742	-40.0065	0.6679	0.6448	-14.6332	-41.4832	0.919	0.8787	-23.3595	-59.8755	1.0596	1.0189	-21.6142	-51.2835	1.1998	1.189	-7.11525	-64.7085	1.4159	1.3862	-21.7485	-65.1113	1.6449	1.6186	-26.85	-56.7877
		38.6667		0.3633	0.354	-7.11525	-18.258	0.3907	0.3855	-9.80025	-21.3457	0.4391	0.4293	-13.425	-26.1787	0.5452	0.5295	-10.0687	-34.6365	0.5857	0.5674	-12.351	-38.664	0.666	0.6443	-17.184	-42.1545	0.9282	0.8793	-11.0085	-59.07	1.0578	1.0193	-24.0307	-50.7465	1.1965	1.1929	-11.5455	-59.4727	1.4111	1.3929	-28.1925	-56.1165	1.6388	1.6207	-35.0393	-53.9685
		38.7333		0.3617	0.3546	-9.26325	-17.4525	0.3933	0.3851	-6.30975	-21.8827	0.4402	0.4293	-11.9483	-26.1787	0.5432	0.5294	-12.7537	-34.7708	0.5888	0.5682	-8.18925	-37.59	0.6643	0.6438	-19.4663	-42.8257	0.9097	0.8764	-35.8447	-62.9633	1.0599	1.0218	-21.2115	-47.3902	1.1993	1.1899	-7.7865	-63.5003	1.4128	1.3934	-25.9102	-55.4453	1.6385	1.618	-35.442	-57.5933
		38.8		0.3614	0.3536	-9.666	-18.795	0.3911	0.3866	-9.26325	-19.869	0.439	0.4306	-13.5593	-24.4335	0.5479	0.5297	-6.444	-34.368	0.5855	0.5688	-12.6195	-36.7845	0.6643	0.6513	-19.4663	-32.757	0.9158	0.877	-27.6555	-62.1578	1.0573	1.02	-24.702	-49.8067	1.2009	1.1939	-5.6385	-58.1303	1.4097	1.3918	-30.072	-57.5933	1.6392	1.6152	-34.5023	-61.3523
		38.8667		0.3638	0.3547	-6.444	-17.3182	0.3925	0.3883	-7.38375	-17.5868	0.4399	0.4287	-12.351	-26.9842	0.5456	0.5285	-9.53175	-35.979	0.5879	0.5672	-9.3975	-38.9325	0.6627	0.6471	-21.6143	-38.3955	0.9126	0.8783	-31.9515	-60.4125	1.0608	1.02	-20.0032	-49.8067	1.1979	1.1902	-9.666	-63.0975	1.41	1.3957	-29.6692	-52.3575	1.6413	1.6254	-31.683	-47.6588
		38.9333		0.3636	0.356	-6.7125	-15.573	0.3927	0.3854	-7.11525	-21.48	0.44	0.427	-12.2168	-29.2665	0.5498	0.5329	-3.89325	-30.072	0.5893	0.5688	-7.518	-36.7845	0.6674	0.6479	-15.3045	-37.3215	0.9149	0.8811	-28.8637	-56.6535	1.0586	1.0146	-22.9568	-57.0562	1.2016	1.196	-4.69875	-55.311	1.4192	1.3927	-17.3182	-56.385	1.6427	1.6122	-29.8035	-65.3798
		39		0.3637	0.3553	-6.57825	-16.5127	0.3931	0.3858	-6.57825	-20.943	0.4406	0.4311	-11.4113	-23.7622	0.5437	0.5285	-12.0825	-35.979	0.5843	0.5706	-14.2305	-34.368	0.6637	0.6431	-20.2718	-43.7655	0.9141	0.8813	-29.9377	-56.385	1.0578	1.0175	-24.0307	-53.163	1.1989	1.1911	-8.3235	-61.8892	1.4119	1.3964	-27.1185	-51.4178	1.6389	1.6166	-34.905	-59.4727
		39.0667		0.3642	0.3535	-5.907	-18.9292	0.3922	0.3873	-7.7865	-18.9293	0.4398	0.431	-12.4853	-23.8965	0.5464	0.5328	-8.45775	-30.2062	0.5866	0.5661	-11.1427	-40.4092	0.6648	0.6432	-18.795	-43.6312	0.9104	0.8778	-34.905	-61.0838	1.0566	1.017	-25.6418	-53.8343	1.2072	1.1891	2.81925	-64.5742	1.4174	1.3921	-19.7347	-57.1905	1.6521	1.6214	-17.184	-53.0288
		39.1333		0.3631	0.3564	-7.38375	-15.036	0.3933	0.3889	-6.30975	-16.7812	0.4411	0.4274	-10.74	-28.7295	0.5427	0.5279	-13.425	-36.7845	0.588	0.5656	-9.26325	-41.0805	0.664	0.6437	-19.869	-42.96	0.9141	0.8791	-29.9377	-59.3385	1.0592	1.0213	-22.1513	-48.0615	1.1984	1.1887	-8.99475	-65.1112	1.4097	1.394	-30.072	-54.6398	1.6406	1.6183	-32.6227	-57.1905
		39.2		0.3646	0.3551	-5.37	-16.7812	0.3927	0.391	-7.11525	-13.962	0.4395	0.4275	-12.888	-28.5952	0.5458	0.5299	-9.26325	-34.0995	0.5867	0.5663	-11.0085	-40.1407	0.6665	0.6471	-16.5127	-38.3955	0.9149	0.8832	-28.8637	-53.8343	1.0568	1.0174	-25.3733	-53.2972	1.1988	1.1945	-8.45775	-57.3247	1.4104	1.3894	-29.1322	-60.8153	1.6361	1.6195	-38.664	-55.5795
		39.2667		0.3616	0.3544	-9.3975	-17.721	0.393	0.3881	-6.7125	-17.8552	0.4386	0.4301	-14.0963	-25.1047	0.5487	0.5296	-5.37	-34.5023	0.5886	0.5655	-8.45775	-41.2147	0.663	0.6462	-21.2115	-39.6037	0.9156	0.8842	-27.924	-52.4918	1.06	1.0165	-21.0773	-54.5055	1.1974	1.1908	-10.3373	-62.292	1.4059	1.3894	-35.1735	-60.8153	1.6367	1.6174	-37.8585	-58.3988
		39.3333		0.3623	0.3552	-8.45775	-16.647	0.3931	0.3877	-6.57825	-18.3922	0.442	0.4304	-9.53175	-24.702	0.5434	0.531	-12.4852	-32.6227	0.5862	0.5672	-11.6797	-38.9325	0.6652	0.6423	-18.258	-44.8395	0.9092	0.8776	-36.516	-61.3522	1.0574	1.0162	-24.5678	-54.9082	1.1966	1.1897	-11.4112	-63.7687	1.4145	1.3912	-23.628	-58.3988	1.6405	1.6146	-32.757	-62.1578
		39.4		0.3619	0.3566	-8.99475	-14.7675	0.3905	0.3858	-10.0688	-20.943	0.4394	0.4286	-13.0222	-27.1185	0.5445	0.5254	-11.0085	-40.1408	0.5892	0.5644	-7.65225	-42.6915	0.6674	0.6478	-15.3045	-37.4557	0.9175	0.8817	-25.3732	-55.848	1.0602	1.017	-20.8087	-53.8343	1.2	1.1923	-6.84675	-60.2783	1.4228	1.3929	-12.4852	-56.1165	1.6404	1.6212	-32.8913	-53.2973
		39.4667		0.3622	0.3552	-8.592	-16.647	0.3937	0.3865	-5.77275	-20.0032	0.4391	0.4303	-13.425	-24.8362	0.5482	0.5291	-6.04125	-35.1735	0.5872	0.5677	-10.3372	-38.2613	0.6621	0.6457	-22.4197	-40.275	0.913	0.876	-31.4145	-63.5003	1.0569	1.0149	-25.239	-56.6535	1.1996	1.1889	-7.38375	-64.8427	1.4092	1.3911	-30.7432	-58.533	1.636	1.6206	-38.7983	-54.1028
		39.5333		0.3625	0.3544	-8.18925	-17.721	0.393	0.3871	-6.7125	-19.1977	0.4382	0.4292	-14.6333	-26.313	0.5469	0.5294	-7.7865	-34.7708	0.5869	0.5677	-10.74	-38.2613	0.6663	0.6479	-16.7812	-37.3215	0.911	0.8811	-34.0995	-56.6535	1.0544	1.0186	-28.5952	-51.6862	1.1973	1.1914	-10.4715	-61.4865	1.4056	1.3933	-35.5763	-55.5795	1.6336	1.6245	-42.0203	-48.867
		39.6		0.3646	0.3545	-5.37	-17.5867	0.3929	0.3848	-6.84675	-22.2855	0.4392	0.4296	-13.2908	-25.776	0.5484	0.5305	-5.77275	-33.294	0.5841	0.568	-14.499	-37.8585	0.6631	0.6423	-21.0772	-44.8395	0.9158	0.8848	-27.6555	-51.6862	1.0552	1.0181	-27.5213	-52.3575	1.2035	1.1971	-2.148	-53.8342	1.4108	1.3948	-28.5952	-53.5658	1.6388	1.6226	-35.0393	-51.4178
		39.6667		0.363	0.3543	-7.518	-17.8552	0.391	0.3856	-9.3975	-21.2115	0.4416	0.4274	-10.0688	-28.7295	0.5468	0.5305	-7.92075	-33.294	0.5856	0.567	-12.4852	-39.201	0.6662	0.6431	-16.9155	-43.7655	0.9125	0.8764	-32.0857	-62.9633	1.0537	1.0194	-29.535	-50.6122	1.1966	1.1922	-11.4112	-60.4125	1.4068	1.4	-33.9652	-46.5848	1.6375	1.618	-36.7845	-57.5933
		39.7333		0.3627	0.3546	-7.92075	-17.4525	0.3936	0.3856	-5.907	-21.2115	0.4401	0.4291	-12.0825	-26.4472	0.5466	0.5285	-8.18925	-35.979	0.5886	0.5665	-8.45775	-39.8722	0.6673	0.6397	-15.4388	-48.33	0.922	0.8825	-19.332	-54.774	1.0618	1.0217	-18.6607	-47.5245	1.1957	1.1965	-12.6195	-54.6398	1.4066	1.3964	-34.2337	-51.4178	1.6419	1.6227	-30.8775	-51.2835
		39.8		0.3627	0.3542	-7.92075	-17.9895	0.3934	0.3873	-6.1755	-18.9293	0.442	0.4297	-9.53175	-25.6417	0.55	0.5284	-3.62475	-36.1133	0.5872	0.5706	-10.3372	-34.368	0.6638	0.6424	-20.1375	-44.7052	0.9247	0.877	-15.7072	-62.1578	1.0598	1.0192	-21.3457	-50.8807	1.1926	1.1901	-16.7812	-63.2318	1.4205	1.3926	-15.573	-56.5193	1.638	1.6203	-36.1133	-54.5055
		39.8667		0.3622	0.3533	-8.592	-19.1977	0.392	0.3842	-8.055	-23.091	0.4406	0.4268	-11.4113	-29.535	0.5454	0.5297	-9.80025	-34.368	0.5871	0.5666	-10.4715	-39.738	0.666	0.6452	-17.184	-40.9462	0.9187	0.8786	-23.7622	-60.0097	1.0585	1.0192	-23.091	-50.8807	1.1981	1.1894	-9.3975	-64.1715	1.409	1.3993	-31.0117	-47.5245	1.6378	1.6157	-36.3818	-60.681
		39.9333		0.3613	0.3549	-9.80025	-17.0498	0.391	0.3847	-9.3975	-22.4198	0.4416	0.4296	-10.0688	-25.776	0.5455	0.5278	-9.666	-36.9187	0.5865	0.5664	-11.277	-40.0065	0.664	0.6448	-19.869	-41.4832	0.9135	0.8754	-30.7432	-64.3057	1.0546	1.019	-28.3268	-51.1492	1.1986	1.1928	-8.72625	-59.607	1.4114	1.4005	-27.7897	-45.9135	1.639	1.6156	-34.7708	-60.8153
		40		0.3661	0.3541	-3.35625	-18.1237	0.3913	0.3868	-8.99475	-19.6005	0.4411	0.4281	-10.74	-27.7897	0.5459	0.5286	-9.129	-35.8448	0.5901	0.5687	-6.444	-36.9187	0.6669	0.645	-15.9757	-41.2147	0.9147	0.8753	-29.1323	-64.44	1.0614	1.018	-19.1978	-52.4917	1.2011	1.1877	-5.37	-66.4537	1.4207	1.3892	-15.3045	-61.0838	1.6447	1.6216	-27.1185	-52.7603
		40.0667		0.3651	0.3558	-4.69875	-15.8415	0.3935	0.3876	-6.04125	-18.5265	0.4422	0.4289	-9.26325	-26.7157	0.5455	0.5279	-9.666	-36.7845	0.5849	0.5677	-13.425	-38.2613	0.6639	0.648	-20.0032	-37.1872	0.914	0.8807	-30.072	-57.1905	1.0645	1.0165	-15.036	-54.5055	1.1993	1.1829	-7.7865	-72.8977	1.42	1.3911	-16.2442	-58.533	1.6372	1.6169	-37.1872	-59.07
		40.1333		0.3639	0.3541	-6.30975	-18.1237	0.3924	0.3857	-7.518	-21.0773	0.4429	0.4287	-8.3235	-26.9842	0.5444	0.5293	-11.1427	-34.905	0.589	0.5675	-7.92075	-38.5297	0.6689	0.6484	-13.2907	-36.6502	0.9101	0.8799	-35.3077	-58.2645	1.0636	1.0204	-16.2442	-49.2697	1.2025	1.1891	-3.4905	-64.5742	1.4094	1.3894	-30.4747	-60.8153	1.6361	1.6267	-38.664	-45.9135
		40.2		0.3611	0.3543	-10.0688	-17.8552	0.3929	0.3879	-6.84675	-18.1237	0.4412	0.4285	-10.6058	-27.2527	0.5478	0.5291	-6.57825	-35.1735	0.5867	0.5634	-11.0085	-44.034	0.6622	0.646	-22.2855	-39.8722	0.9155	0.8768	-28.0583	-62.4262	1.0554	1.0221	-27.2528	-46.9875	1.2005	1.1886	-6.1755	-65.2455	1.4141	1.3896	-24.165	-60.5468	1.6413	1.6154	-31.683	-61.0838
		40.2667		0.3625	0.3533	-8.18925	-19.1977	0.3925	0.3886	-7.38375	-17.184	0.443	0.431	-8.18925	-23.8965	0.5432	0.5274	-12.7537	-37.4558	0.5871	0.5655	-10.4715	-41.2147	0.665	0.6486	-18.5265	-36.3818	0.9099	0.8781	-35.5762	-60.681	1.0592	1.0211	-22.1513	-48.33	1.1979	1.1914	-9.666	-61.4865	1.4107	1.395	-28.7295	-53.2973	1.6358	1.6223	-39.0668	-51.8205
		40.3333		0.362	0.3534	-8.8605	-19.0635	0.3938	0.3853	-5.6385	-21.6143	0.4425	0.4283	-8.8605	-27.5212	0.5457	0.5281	-9.3975	-36.516	0.5889	0.5663	-8.055	-40.1407	0.6683	0.6438	-14.0963	-42.8257	0.9072	0.8812	-39.201	-56.5193	1.0553	1.0202	-27.387	-49.5382	1.1959	1.1926	-12.351	-59.8755	1.4136	1.3955	-24.8363	-52.626	1.6332	1.6267	-42.5573	-45.9135
		40.4		0.3637	0.3528	-6.57825	-19.869	0.3932	0.3857	-6.444	-21.0773	0.447	0.4263	-2.81925	-30.2062	0.5451	0.5279	-10.203	-36.7845	0.5853	0.5621	-12.888	-45.7792	0.6647	0.6482	-18.9293	-36.9187	0.9167	0.8753	-26.4472	-64.44	1.0624	1.0199	-17.8552	-49.941	1.1931	1.1892	-16.11	-64.44	1.4096	1.3894	-30.2062	-60.8153	1.6328	1.6204	-43.0943	-54.3713
		40.4667		0.3636	0.3533	-6.7125	-19.1977	0.3913	0.3868	-8.99475	-19.6005	0.4602	0.4295	14.9017	-25.9102	0.5446	0.5301	-10.8742	-33.831	0.5891	0.566	-7.7865	-40.5435	0.6668	0.6463	-16.11	-39.4695	0.9153	0.8777	-28.3267	-61.218	1.0557	1.0213	-26.85	-48.0615	1.2006	1.1907	-6.04125	-62.4262	1.4108	1.3922	-28.5952	-57.0563	1.6388	1.6083	-35.0393	-70.6155
		40.5333		0.3638	0.3534	-6.444	-19.0635	0.3919	0.3855	-8.18925	-21.3457	0.4396	0.4304	-12.7538	-24.702	0.5446	0.5313	-10.8742	-32.22	0.5865	0.5654	-11.277	-41.349	0.6663	0.6441	-16.7812	-42.423	0.9103	0.8775	-35.0393	-61.4865	1.0587	1.0174	-22.8225	-53.2972	1.1978	1.1891	-9.80025	-64.5742	1.416	1.3935	-21.6142	-55.311	1.6326	1.6117	-43.3627	-66.051
		40.6		0.3624	0.3563	-8.3235	-15.1702	0.3902	0.3851	-10.4715	-21.8827	0.4434	0.4279	-7.65225	-28.0582	0.5491	0.5288	-4.833	-35.5762	0.5864	0.5642	-11.4112	-42.96	0.6632	0.6451	-20.943	-41.0805	0.9165	0.8775	-26.7157	-61.4865	1.057	1.0184	-25.1047	-51.9547	1.1985	1.1926	-8.8605	-59.8755	1.4117	1.3944	-27.387	-54.1028	1.6384	1.6156	-35.5763	-60.8153
		40.6667		0.3608	0.3535	-10.4715	-18.9292	0.3912	0.3864	-9.129	-20.1375	0.4393	0.4303	-13.1565	-24.8362	0.5458	0.526	-9.26325	-39.3353	0.5883	0.5661	-8.8605	-40.4092	0.6656	0.6403	-17.721	-47.5245	0.9206	0.8785	-21.2115	-60.144	1.0585	1.0185	-23.091	-51.8205	1.1935	1.1933	-15.573	-58.9358	1.409	1.3867	-31.0117	-64.44	1.6341	1.6133	-41.349	-63.903
		40.7333		0.3592	0.3525	-12.6195	-20.2717	0.3923	0.3842	-7.65225	-23.091	0.4425	0.4286	-8.8605	-27.1185	0.5442	0.527	-11.4112	-37.9928	0.5888	0.5641	-8.18925	-43.0942	0.6645	0.6443	-19.1977	-42.1545	0.9183	0.8776	-24.2993	-61.3522	1.059	1.0216	-22.4198	-47.6587	1.1967	1.1925	-11.277	-60.0097	1.4057	1.3968	-35.442	-50.8808	1.6395	1.6145	-34.0995	-62.292
		40.8		0.3648	0.3517	-5.1015	-21.3458	0.3911	0.3873	-9.26325	-18.9293	0.4414	0.4278	-10.3373	-28.1925	0.5424	0.5317	-13.8277	-31.683	0.5865	0.567	-11.277	-39.201	0.6641	0.642	-19.7347	-45.2422	0.9137	0.877	-30.4748	-62.1578	1.0575	1.0169	-24.4335	-53.9685	1.1982	1.1967	-9.26325	-54.3712	1.4132	1.3892	-25.3732	-61.0838	1.6402	1.6122	-33.1598	-65.3798
		40.8667		0.364	0.3537	-6.1755	-18.6608	0.3914	0.3876	-8.8605	-18.5265	0.4394	0.4267	-13.0222	-29.6692	0.5445	0.5298	-11.0085	-34.2337	0.5875	0.566	-9.9345	-40.5435	0.6662	0.6434	-16.9155	-43.3627	0.91	0.8779	-35.442	-60.9495	1.0597	1.0175	-21.48	-53.163	1.1976	1.1902	-10.0688	-63.0975	1.4115	1.3883	-27.6555	-62.292	1.6436	1.6157	-28.5953	-60.681
		40.9333		0.362	0.3534	-8.8605	-19.0635	0.3903	0.3864	-10.3373	-20.1375	0.4423	0.428	-9.129	-27.924	0.5445	0.5272	-11.0085	-37.7242	0.5851	0.5657	-13.1565	-40.9462	0.6635	0.6441	-20.5403	-42.423	0.9121	0.8747	-32.6227	-65.2455	1.0558	1.0217	-26.7157	-47.5245	1.1959	1.1892	-12.351	-64.44	1.4092	1.3928	-30.7432	-56.2508	1.6382	1.6188	-35.8448	-56.5193
		41		0.3605	0.356	-10.8742	-15.573	0.3915	0.3868	-8.72625	-19.6005	0.4405	0.4285	-11.5455	-27.2527	0.5453	0.5282	-9.9345	-36.3818	0.585	0.5677	-13.2907	-38.2613	0.6617	0.646	-22.9568	-39.8722	0.9143	0.8763	-29.6692	-63.0975	1.0561	1.0127	-26.313	-59.607	1.1987	1.188	-8.592	-66.051	1.4098	1.3942	-29.9377	-54.3713	1.6369	1.6125	-37.59	-64.977
		41.0667		0.3616	0.3567	-9.3975	-14.6332	0.3923	0.3871	-7.65225	-19.1977	0.4377	0.4307	-15.3045	-24.2992	0.5432	0.5289	-12.7537	-35.442	0.5879	0.5681	-9.3975	-37.7242	0.6679	0.6437	-14.6332	-42.96	0.9086	0.8752	-37.3215	-64.5743	1.0617	1.0163	-18.795	-54.774	1.1968	1.1907	-11.1427	-62.4262	1.4113	1.3951	-27.924	-53.163	1.6315	1.6191	-44.8395	-56.1165
		41.1333		0.3633	0.3573	-7.11525	-13.8277	0.3947	0.3865	-4.43025	-20.0032	0.44	0.4284	-12.2168	-27.387	0.5452	0.5287	-10.0687	-35.7105	0.5876	0.5689	-9.80025	-36.6502	0.6654	0.6426	-17.9895	-44.4367	0.9097	0.8803	-35.8447	-57.7275	1.0546	1.0172	-28.3268	-53.5657	1.1938	1.1848	-15.1703	-70.347	1.4096	1.3886	-30.2062	-61.8892	1.6283	1.6159	-49.1355	-60.4125
		41.2		0.3626	0.3558	-8.055	-15.8415	0.394	0.3858	-5.37	-20.943	0.4426	0.4296	-8.72625	-25.776	0.5426	0.5268	-13.5592	-38.2612	0.5851	0.5654	-13.1565	-41.349	0.6658	0.6447	-17.4525	-41.6175	0.9115	0.8731	-33.4282	-67.3935	1.0588	1.0189	-22.6882	-51.2835	1.1957	1.1901	-12.6195	-63.2318	1.4118	1.3949	-27.2527	-53.4315	1.6395	1.6185	-34.0995	-56.922
		41.2667		0.3639	0.3567	-6.30975	-14.6332	0.3903	0.3872	-10.3373	-19.0635	0.4456	0.4278	-4.69875	-28.1925	0.5451	0.5275	-10.203	-37.3215	0.5862	0.5646	-11.6797	-42.423	0.6627	0.6438	-21.6143	-42.8257	0.9107	0.8772	-34.5023	-61.8893	1.0612	1.0125	-19.4663	-59.8755	1.1977	1.1938	-9.9345	-58.2645	1.414	1.3942	-24.2992	-54.3713	1.6288	1.6086	-48.4643	-70.2128
		41.3333		0.3609	0.3553	-10.3372	-16.5127	0.3897	0.3853	-11.1428	-21.6143	0.4665	0.4286	23.3595	-27.1185	0.5453	0.5277	-9.9345	-37.053	0.5888	0.5654	-8.18925	-41.349	0.6668	0.6413	-16.11	-46.182	0.916	0.874	-27.387	-66.1852	1.054	1.0154	-29.1322	-55.9822	1.1993	1.1913	-7.7865	-61.6208	1.4199	1.3928	-16.3785	-56.2508	1.6398	1.6123	-33.6968	-65.2455
		41.4		0.3622	0.358	-8.592	-12.888	0.3921	0.3862	-7.92075	-20.406	0.4413	0.4264	-10.4715	-30.072	0.5463	0.5289	-8.592	-35.442	0.5849	0.5644	-13.425	-42.6915	0.667	0.6466	-15.8415	-39.0667	0.9136	0.8772	-30.609	-61.8893	1.0618	1.0187	-18.6607	-51.552	1.1965	1.1884	-11.5455	-65.514	1.4065	1.3899	-34.368	-60.144	1.6385	1.6254	-35.442	-47.6588
		41.4667		0.3618	0.3527	-9.129	-20.0032	0.3925	0.3871	-7.38375	-19.1977	0.4389	0.4279	-13.6935	-28.0582	0.5453	0.5272	-9.9345	-37.7242	0.5865	0.5642	-11.277	-42.96	0.6639	0.6434	-20.0032	-43.3627	0.9183	0.8793	-24.2993	-59.07	1.0555	1.0152	-27.1185	-56.2507	1.1923	1.1866	-17.184	-67.9305	1.4108	1.3955	-28.5952	-52.626	1.6418	1.6107	-31.0118	-67.3935
		41.5333		0.3635	0.3526	-6.84675	-20.1375	0.3921	0.3851	-7.92075	-21.8827	0.4398	0.4291	-12.4853	-26.4472	0.5457	0.5291	-9.3975	-35.1735	0.5881	0.5648	-9.129	-42.1545	0.6643	0.6447	-19.4663	-41.6175	0.9139	0.8741	-30.2062	-66.051	1.0582	1.0172	-23.4937	-53.5657	1.2012	1.189	-5.23575	-64.7085	1.4068	1.3941	-33.9652	-54.5055	1.637	1.6117	-37.4558	-66.051
		41.6		0.3613	0.3551	-9.80025	-16.7812	0.3912	0.3867	-9.129	-19.7347	0.441	0.4277	-10.8743	-28.3267	0.5494	0.5301	-4.43025	-33.831	0.5886	0.5667	-8.45775	-39.6037	0.6653	0.6435	-18.1238	-43.2285	0.9119	0.8736	-32.8912	-66.7223	1.0561	1.0159	-26.313	-55.311	1.1937	1.187	-15.3045	-67.3935	1.4159	1.3958	-21.7485	-52.2233	1.6371	1.6121	-37.3215	-65.514
		41.6667		0.3628	0.3557	-7.7865	-15.9758	0.391	0.3865	-9.3975	-20.0032	0.4416	0.4289	-10.0688	-26.7157	0.5426	0.5244	-13.5592	-41.4833	0.5897	0.5631	-6.981	-44.4367	0.6653	0.6478	-18.1238	-37.4557	0.9116	0.8805	-33.294	-57.459	1.0641	1.015	-15.573	-56.5193	1.2031	1.1853	-2.685	-69.6758	1.4131	1.3919	-25.5075	-57.459	1.638	1.6188	-36.1133	-56.5193
		41.7333		0.3623	0.3541	-8.45775	-18.1237	0.3933	0.3863	-6.30975	-20.2718	0.4375	0.4274	-15.573	-28.7295	0.5464	0.53	-8.45775	-33.9653	0.5881	0.5659	-9.129	-40.6777	0.6693	0.6437	-12.7538	-42.96	0.9133	0.8791	-31.0117	-59.3385	1.0633	1.0188	-16.647	-51.4177	1.2024	1.1863	-3.62475	-68.3333	1.4094	1.3944	-30.4747	-54.1028	1.6362	1.6204	-38.5298	-54.3713
		41.8		0.3611	0.3539	-10.0688	-18.3922	0.3908	0.3869	-9.666	-19.4662	0.439	0.4256	-13.5593	-31.146	0.547	0.5273	-7.65225	-37.59	0.5856	0.5665	-12.4852	-39.8722	0.6648	0.6429	-18.795	-44.034	0.9163	0.8737	-26.9842	-66.588	1.0562	1.0143	-26.1787	-57.459	1.1977	1.1886	-9.9345	-65.2455	1.4152	1.3974	-22.6882	-50.0753	1.6368	1.6111	-37.7243	-66.8565
		41.8667		0.3627	0.3556	-7.92075	-16.11	0.3918	0.3866	-8.3235	-19.869	0.4394	0.4283	-13.0222	-27.5212	0.5448	0.5286	-10.6057	-35.8448	0.5863	0.5643	-11.5455	-42.8257	0.6647	0.6382	-18.9293	-50.3437	0.916	0.8753	-27.387	-64.44	1.0593	1.0219	-22.017	-47.256	1.1956	1.1887	-12.7538	-65.1112	1.412	1.3955	-26.9842	-52.626	1.6382	1.61	-35.8448	-68.3333
		41.9333		0.3632	0.3572	-7.2495	-13.962	0.3906	0.3869	-9.9345	-19.4662	0.4397	0.4273	-12.6195	-28.8637	0.545	0.5284	-10.3372	-36.1133	0.5838	0.563	-14.9017	-44.571	0.6614	0.6434	-23.3595	-43.3627	0.9148	0.8797	-28.998	-58.533	1.0561	1.0201	-26.313	-49.6725	1.1947	1.1919	-13.962	-60.8153	1.4163	1.3997	-21.2115	-46.9875	1.6289	1.606	-48.33	-73.7033
		42		0.3643	0.355	-5.77275	-16.9155	0.3927	0.3862	-7.11525	-20.406	0.4453	0.4279	-5.1015	-28.0582	0.5448	0.5287	-10.6057	-35.7105	0.586	0.5677	-11.9482	-38.2613	0.6681	0.6407	-14.3647	-46.9875	0.9123	0.8754	-32.3543	-64.3057	1.0572	1.0178	-24.8363	-52.7602	1.197	1.1916	-10.8743	-61.218	1.4082	1.3939	-32.0858	-54.774	1.6366	1.613	-37.9927	-64.3058
		42.0667		0.3642	0.3545	-5.907	-17.5867	0.3903	0.3853	-10.3373	-21.6143	0.4465	0.4286	-3.4905	-27.1185	0.5456	0.5265	-9.53175	-38.664	0.5863	0.5696	-11.5455	-35.7105	0.666	0.6417	-17.184	-45.645	0.9138	0.8817	-30.3405	-55.848	1.0569	1.0128	-25.239	-59.4727	1.1974	1.1847	-10.3373	-70.4813	1.4134	1.3948	-25.1047	-53.5658	1.6374	1.6202	-36.9188	-54.6398
		42.1333		0.3665	0.3536	-2.81925	-18.795	0.39	0.3856	-10.74	-21.2115	0.44	0.4277	-12.2168	-28.3267	0.5451	0.5242	-10.203	-41.7518	0.588	0.5636	-9.26325	-43.7655	0.6628	0.642	-21.48	-45.2422	0.9085	0.8752	-37.4557	-64.5743	1.0628	1.0151	-17.3183	-56.385	1.1949	1.187	-13.6935	-67.3935	1.4045	1.397	-37.053	-50.6123	1.6355	1.6173	-39.4695	-58.533
		42.2		0.3633	0.3561	-7.11525	-15.4387	0.3907	0.3854	-9.80025	-21.48	0.4546	0.429	7.38375	-26.5815	0.5461	0.5264	-8.8605	-38.7983	0.5901	0.5643	-6.444	-42.8257	0.6696	0.6407	-12.351	-46.9875	0.9146	0.8737	-29.2665	-66.588	1.0597	1.0164	-21.48	-54.6397	1.1984	1.191	-8.99475	-62.0235	1.4078	1.3932	-32.6227	-55.7138	1.632	1.6251	-44.1683	-48.0615
		42.2667		0.3645	0.3534	-5.50425	-19.0635	0.391	0.3854	-9.3975	-21.48	0.4464	0.4282	-3.62475	-27.6555	0.5454	0.5254	-9.80025	-40.1408	0.5846	0.5669	-13.8277	-39.3352	0.6643	0.644	-19.4663	-42.5572	0.9199	0.8777	-22.1512	-61.218	1.0601	1.0157	-20.943	-55.5795	1.1998	1.1879	-7.11525	-66.1853	1.4083	1.4016	-31.9515	-44.4368	1.6402	1.6162	-33.1598	-60.0098
		42.3333		0.3634	0.355	-6.981	-16.9155	0.3912	0.3866	-9.129	-19.869	0.4393	0.4286	-13.1565	-27.1185	0.5439	0.5266	-11.814	-38.5298	0.5867	0.5648	-11.0085	-42.1545	0.6678	0.6439	-14.7675	-42.6915	0.9203	0.8738	-21.6143	-66.4537	1.0602	1.0122	-20.8087	-60.2782	1.1998	1.1873	-7.11525	-66.9908	1.4115	1.3988	-27.6555	-48.1958	1.6368	1.6136	-37.7243	-63.5003
		42.4		0.3635	0.3549	-6.84675	-17.0498	0.392	0.3852	-8.055	-21.7485	0.4397	0.4264	-12.6195	-30.072	0.5433	0.5265	-12.6195	-38.664	0.5878	0.5643	-9.53175	-42.8257	0.6668	0.6457	-16.11	-40.275	0.9271	0.8764	-12.4852	-62.9633	1.0611	1.0174	-19.6005	-53.2972	1.1959	1.195	-12.351	-56.6535	1.408	1.3957	-32.3542	-52.3575	1.6391	1.6146	-34.6365	-62.1578
		42.4667		0.3648	0.3551	-5.1015	-16.7812	0.3907	0.3855	-9.80025	-21.3457	0.4394	0.4268	-13.0222	-29.535	0.5466	0.526	-8.18925	-39.3353	0.5857	0.5667	-12.351	-39.6037	0.6665	0.6404	-16.5127	-47.3902	0.9219	0.8818	-19.4662	-55.7137	1.0589	1.0149	-22.554	-56.6535	1.2008	1.1888	-5.77275	-64.977	1.4122	1.396	-26.7158	-51.9548	1.6437	1.6116	-28.461	-66.1853
		42.5333		0.3619	0.3549	-8.99475	-17.0498	0.3904	0.3882	-10.203	-17.721	0.4388	0.428	-13.8278	-27.924	0.5454	0.5289	-9.80025	-35.442	0.5901	0.5682	-6.444	-37.59	0.6645	0.6422	-19.1977	-44.9737	0.9169	0.876	-26.1787	-63.5003	1.059	1.0152	-22.4198	-56.2507	1.1957	1.1869	-12.6195	-67.5277	1.4065	1.3892	-34.368	-61.0838	1.6381	1.6211	-35.979	-53.4315
		42.6		0.3602	0.355	-11.277	-16.9155	0.3909	0.3874	-9.53175	-18.795	0.4381	0.4276	-14.7675	-28.461	0.549	0.5267	-4.96725	-38.3955	0.5838	0.5626	-14.9017	-45.108	0.6649	0.6452	-18.6607	-40.9462	0.9133	0.8733	-31.0117	-67.125	1.0601	1.0201	-20.943	-49.6725	1.1982	1.1854	-9.26325	-69.5415	1.4108	1.3941	-28.5952	-54.5055	1.6365	1.611	-38.127	-66.9908
		42.6667		0.365	0.3549	-4.833	-17.0498	0.3893	0.3867	-11.6798	-19.7347	0.4394	0.4287	-13.0222	-26.9842	0.5456	0.5265	-9.53175	-38.664	0.5893	0.5643	-7.518	-42.8257	0.6648	0.6441	-18.795	-42.423	0.9144	0.8729	-29.535	-67.662	1.0566	1.0091	-25.6418	-64.44	1.198	1.1869	-9.53175	-67.5277	1.4062	1.3936	-34.7708	-55.1768	1.6364	1.6143	-38.2613	-62.5605
		42.7333		0.363	0.357	-7.518	-14.2305	0.3917	0.3855	-8.45775	-21.3457	0.438	0.4265	-14.9018	-29.9377	0.5445	0.5281	-11.0085	-36.516	0.586	0.5637	-11.9482	-43.6313	0.6622	0.6456	-22.2855	-40.4093	0.9132	0.8785	-31.146	-60.144	1.0586	1.013	-22.9568	-59.2043	1.1948	1.1938	-13.8277	-58.2645	1.4197	1.3915	-16.647	-57.996	1.6301	1.6166	-46.719	-59.4727
		42.8		0.3633	0.3523	-7.11525	-20.5402	0.3898	0.3847	-11.0085	-22.4198	0.439	0.4283	-13.5593	-27.5212	0.546	0.5266	-8.99475	-38.5298	0.5881	0.5679	-9.129	-37.9927	0.6626	0.6467	-21.7485	-38.9325	0.9124	0.8747	-32.22	-65.2455	1.0543	1.0182	-28.7295	-52.2232	1.1992	1.1879	-7.92075	-66.1853	1.4092	1.3883	-30.7432	-62.292	1.6426	1.6171	-29.9378	-58.8015
		42.8667		0.3627	0.3541	-7.92075	-18.1237	0.3904	0.3858	-10.203	-20.943	0.437	0.4283	-16.2443	-27.5212	0.5426	0.5273	-13.5592	-37.59	0.5882	0.5666	-8.99475	-39.738	0.6638	0.6438	-20.1375	-42.8257	0.9188	0.8739	-23.628	-66.3195	1.0614	1.0145	-19.1978	-57.1905	1.1939	1.1919	-15.036	-60.8153	1.4095	1.3945	-30.3405	-53.9685	1.6298	1.6113	-47.1218	-66.588
		42.9333		0.361	0.3552	-10.203	-16.647	0.3927	0.3846	-7.11525	-22.554	0.4392	0.4306	-13.2908	-24.4335	0.5457	0.5261	-9.3975	-39.201	0.5854	0.5648	-12.7537	-42.1545	0.6639	0.6486	-20.0032	-36.3818	0.909	0.8781	-36.7845	-60.681	1.0593	1.0169	-22.017	-53.9685	1.1938	1.1901	-15.1703	-63.2318	1.4074	1.3965	-33.1597	-51.2835	1.6319	1.618	-44.3025	-57.5933
		43		0.3609	0.3563	-10.3372	-15.1702	0.3933	0.3844	-6.30975	-22.8225	0.4388	0.4251	-13.8278	-31.8172	0.547	0.5249	-7.65225	-40.812	0.587	0.5637	-10.6057	-43.6313	0.6662	0.6453	-16.9155	-40.812	0.9128	0.8715	-31.683	-69.5415	1.059	1.0179	-22.4198	-52.626	1.1975	1.1895	-10.203	-64.0373	1.4083	1.3933	-31.9515	-55.5795	1.6348	1.6108	-40.4093	-67.2593
		43.0667		0.3625	0.3569	-8.18925	-14.3648	0.3938	0.3862	-5.6385	-20.406	0.4388	0.4258	-13.8278	-30.8775	0.5447	0.5265	-10.74	-38.664	0.5861	0.5631	-11.814	-44.4367	0.6639	0.6488	-20.0032	-36.1132	0.9105	0.8749	-34.7707	-64.977	1.0524	1.013	-31.2802	-59.2043	1.2012	1.1866	-5.23575	-67.9305	1.4143	1.3894	-23.8965	-60.8153	1.6382	1.6128	-35.8448	-64.5743
		43.1333		0.3616	0.3558	-9.3975	-15.8415	0.3924	0.3851	-7.518	-21.8827	0.4387	0.4272	-13.962	-28.998	0.5468	0.525	-7.92075	-40.6778	0.584	0.5628	-14.6332	-44.8395	0.6629	0.6463	-21.3457	-39.4695	0.9125	0.8767	-32.0857	-62.5605	1.0609	1.013	-19.869	-59.2043	1.1937	1.1892	-15.3045	-64.44	1.4064	1.3864	-34.5022	-64.8428	1.6431	1.6135	-29.2665	-63.6345
		43.2		0.3633	0.3534	-7.11525	-19.0635	0.3934	0.3868	-6.1755	-19.6005	0.4496	0.4308	0.67125	-24.165	0.5447	0.5268	-10.74	-38.2612	0.5854	0.5619	-12.7537	-46.0477	0.6618	0.6422	-22.8225	-44.9737	0.9129	0.8749	-31.5487	-64.977	1.0575	1.0147	-24.4335	-56.922	1.1955	1.1832	-12.888	-72.495	1.409	1.3919	-31.0117	-57.459	1.6374	1.6081	-36.9188	-70.884
		43.2667		0.3626	0.3533	-8.055	-19.1977	0.3932	0.3858	-6.444	-20.943	0.439	0.4284	-13.5593	-27.387	0.5457	0.5241	-9.3975	-41.886	0.5851	0.565	-13.1565	-41.886	0.6654	0.6447	-17.9895	-41.6175	0.9143	0.8753	-29.6692	-64.44	1.055	1.0147	-27.7897	-56.922	1.1988	1.1878	-8.45775	-66.3195	1.4107	1.3855	-28.7295	-66.051	1.6408	1.6193	-32.3543	-55.848
		43.3333		0.3608	0.3528	-10.4715	-19.869	0.3917	0.386	-8.45775	-20.6745	0.4392	0.4269	-13.2908	-29.4007	0.5446	0.5268	-10.8742	-38.2612	0.5859	0.5637	-12.0825	-43.6313	0.6672	0.6421	-15.573	-45.108	0.9114	0.8735	-33.5625	-66.8565	1.0547	1.0111	-28.1925	-61.755	1.1964	1.1931	-11.6798	-59.2042	1.4046	1.3882	-36.9187	-62.4263	1.6404	1.6151	-32.8913	-61.4865
		43.4		0.3621	0.3552	-8.72625	-16.647	0.3925	0.3853	-7.38375	-21.6143	0.4515	0.4256	3.222	-31.146	0.5451	0.5277	-10.203	-37.053	0.5878	0.5634	-9.53175	-44.034	0.6665	0.641	-16.5127	-46.5847	0.9082	0.8772	-37.8585	-61.8893	1.06	1.0166	-21.0773	-54.3712	1.1995	1.1902	-7.518	-63.0975	1.4186	1.3865	-18.1237	-64.7085	1.6414	1.6093	-31.5488	-69.273
		43.4667		0.3636	0.3537	-6.7125	-18.6608	0.3924	0.3874	-7.518	-18.795	0.4385	0.4289	-14.2305	-26.7157	0.5486	0.5274	-5.50425	-37.4558	0.5849	0.5628	-13.425	-44.8395	0.6668	0.6492	-16.11	-35.5762	0.9113	0.8728	-33.6968	-67.7962	1.0601	1.0182	-20.943	-52.2232	1.1955	1.1887	-12.888	-65.1112	1.418	1.3935	-18.9292	-55.311	1.6324	1.6199	-43.6312	-55.0425
		43.5333		0.3628	0.3541	-7.7865	-18.1237	0.393	0.3843	-6.7125	-22.9568	0.4417	0.4284	-9.9345	-27.387	0.5455	0.5264	-9.666	-38.7983	0.5853	0.5642	-12.888	-42.96	0.6642	0.6455	-19.6005	-40.5435	0.9126	0.8786	-31.9515	-60.0097	1.0595	1.0179	-21.7485	-52.626	1.1984	1.1916	-8.99475	-61.218	1.4156	1.3912	-22.1512	-58.3988	1.6382	1.6125	-35.8448	-64.977
		43.6		0.3615	0.3542	-9.53175	-17.9895	0.3914	0.3866	-8.8605	-19.869	0.4375	0.427	-15.573	-29.2665	0.5459	0.5263	-9.129	-38.9325	0.5848	0.5633	-13.5593	-44.1682	0.6645	0.6458	-19.1977	-40.1407	0.9144	0.8772	-29.535	-61.8893	1.0541	1.0136	-28.998	-58.3987	1.1983	1.1885	-9.129	-65.3798	1.4049	1.39	-36.516	-60.0098	1.6387	1.6077	-35.1735	-71.421
		43.6667		0.3623	0.3558	-8.45775	-15.8415	0.3927	0.3863	-7.11525	-20.2718	0.4373	0.4265	-15.8415	-29.9377	0.5444	0.5224	-11.1427	-44.1683	0.587	0.561	-10.6057	-47.256	0.6632	0.6419	-20.943	-45.3765	0.9102	0.8793	-35.1735	-59.07	1.0573	1.0166	-24.702	-54.3712	1.197	1.1935	-10.8743	-58.6672	1.4122	1.3925	-26.7158	-56.6535	1.6396	1.6173	-33.9653	-58.533
		43.7333		0.3634	0.3517	-6.981	-21.3458	0.3926	0.3861	-7.2495	-20.5403	0.4382	0.4254	-14.6333	-31.4145	0.545	0.5276	-10.3372	-37.1873	0.5868	0.5625	-10.8742	-45.2422	0.6643	0.6451	-19.4663	-41.0805	0.9134	0.8749	-30.8775	-64.977	1.0571	1.0132	-24.9705	-58.9357	1.1968	1.1877	-11.1427	-66.4537	1.4095	1.3858	-30.3405	-65.6483	1.6379	1.6106	-36.2475	-67.5278
		43.8		0.3612	0.3549	-9.9345	-17.0498	0.3899	0.386	-10.8742	-20.6745	0.4384	0.4268	-14.3648	-29.535	0.5447	0.5276	-10.74	-37.1873	0.5899	0.5658	-6.7125	-40.812	0.6678	0.645	-14.7675	-41.2147	0.9096	0.8728	-35.979	-67.7962	1.0588	1.0117	-22.6882	-60.9495	1.1973	1.1831	-10.4715	-72.6292	1.4153	1.3907	-22.554	-59.07	1.6318	1.6074	-44.4368	-71.8238
		43.8667		0.3659	0.3552	-3.62475	-16.647	0.3925	0.3845	-7.38375	-22.6883	0.4395	0.4273	-12.888	-28.8637	0.5484	0.523	-5.77275	-43.3628	0.5895	0.5647	-7.2495	-42.2887	0.6624	0.6454	-22.017	-40.6777	0.9107	0.8732	-34.5023	-67.2593	1.061	1.014	-19.7348	-57.8617	1.1916	1.1936	-18.1238	-58.533	1.41	1.3921	-29.6692	-57.1905	1.6359	1.6087	-38.9325	-70.0785
		43.9333		0.3628	0.3537	-7.7865	-18.6608	0.3922	0.3839	-7.7865	-23.4937	0.4382	0.4255	-14.6333	-31.2802	0.5443	0.5262	-11.277	-39.0667	0.5861	0.5654	-11.814	-41.349	0.6652	0.643	-18.258	-43.8997	0.908	0.8769	-38.127	-62.292	1.0563	1.0137	-26.0445	-58.2645	1.1954	1.1914	-13.0222	-61.4865	1.4102	1.3903	-29.4008	-59.607	1.6285	1.6104	-48.867	-67.7963
		44		0.3613	0.3539	-9.80025	-18.3922	0.3913	0.3851	-8.99475	-21.8827	0.4408	0.428	-11.1428	-27.924	0.5455	0.5249	-9.666	-40.812	0.5854	0.5626	-12.7537	-45.108	0.6642	0.639	-19.6005	-49.2697	0.9137	0.8746	-30.4748	-65.3798	1.0544	1.0173	-28.5952	-53.4315	1.1953	1.1916	-13.1565	-61.218	1.4137	1.383	-24.702	-69.4073	1.6369	1.6197	-37.59	-55.311
		44.0667		0.363	0.3534	-7.518	-19.0635	0.3928	0.3864	-6.981	-20.1375	0.4387	0.4298	-13.962	-25.5075	0.5447	0.525	-10.74	-40.6778	0.5904	0.5645	-6.04125	-42.5572	0.6638	0.6398	-20.1375	-48.1957	0.9095	0.8776	-36.1132	-61.3522	1.0534	1.0108	-29.9378	-62.1577	1.1962	1.1921	-11.9483	-60.5468	1.4136	1.3837	-24.8363	-68.4675	1.6363	1.6109	-38.3955	-67.125
		44.1333		0.3621	0.3517	-8.72625	-21.3458	0.3936	0.3871	-5.907	-19.1977	0.4399	0.4272	-12.351	-28.998	0.5476	0.5255	-6.84675	-40.0065	0.5847	0.5643	-13.6935	-42.8257	0.6632	0.6404	-20.943	-47.3902	0.9088	0.8763	-37.053	-63.0975	1.0575	1.0146	-24.4335	-57.0562	1.1961	1.1911	-12.0825	-61.8892	1.4189	1.3905	-17.721	-59.3385	1.6383	1.6139	-35.7105	-63.0975
		44.2		0.3627	0.3542	-7.92075	-17.9895	0.3915	0.3841	-8.72625	-23.2252	0.4407	0.4252	-11.277	-31.683	0.5425	0.525	-13.6935	-40.6778	0.5885	0.5623	-8.592	-45.5107	0.6607	0.6377	-24.2993	-51.015	0.9144	0.8746	-29.535	-65.3798	1.0555	1.0159	-27.1185	-55.311	1.1999	1.1829	-6.981	-72.8977	1.4139	1.3917	-24.4335	-57.7275	1.6479	1.6095	-22.8225	-69.0045
		44.2667		0.3608	0.3527	-10.4715	-20.0032	0.3906	0.3855	-9.9345	-21.3457	0.4399	0.4274	-12.351	-28.7295	0.5442	0.5271	-11.4112	-37.8585	0.5853	0.5662	-12.888	-40.275	0.6647	0.6389	-18.9293	-49.404	0.9089	0.8728	-36.9187	-67.7962	1.0587	1.0104	-22.8225	-62.6947	1.1959	1.1802	-12.351	-76.5225	1.4133	1.3857	-25.239	-65.7825	1.6393	1.614	-34.368	-62.9633
		44.3333		0.3616	0.3533	-9.3975	-19.1977	0.3906	0.3863	-9.9345	-20.2718	0.4385	0.4276	-14.2305	-28.461	0.5424	0.5252	-13.8277	-40.4092	0.5839	0.5633	-14.7675	-44.1682	0.6643	0.6399	-19.4663	-48.0615	0.9165	0.877	-26.7157	-62.1578	1.0564	1.0132	-25.9102	-58.9357	1.1969	1.1902	-11.0085	-63.0975	1.4091	1.3895	-30.8775	-60.681	1.6463	1.604	-24.9705	-76.3883
		44.4		0.3619	0.3519	-8.99475	-21.0772	0.3927	0.3862	-7.11525	-20.406	0.4377	0.4285	-15.3045	-27.2527	0.5444	0.5241	-11.1427	-41.886	0.5871	0.5646	-10.4715	-42.423	0.6665	0.6371	-16.5127	-51.8205	0.9119	0.8805	-32.8912	-57.459	1.0578	1.0166	-24.0307	-54.3712	1.199	1.1884	-8.18925	-65.514	1.4047	1.3859	-36.7845	-65.514	1.6329	1.6057	-42.96	-74.106
		44.4667		0.3627	0.3529	-7.92075	-19.7348	0.3915	0.3842	-8.72625	-23.091	0.4406	0.4271	-11.4113	-29.1322	0.5441	0.524	-11.5455	-42.0203	0.5867	0.5648	-11.0085	-42.1545	0.6642	0.6411	-19.6005	-46.4505	0.9103	0.8747	-35.0393	-65.2455	1.0557	1.0182	-26.85	-52.2232	1.1952	1.1876	-13.2908	-66.588	1.407	1.39	-33.6967	-60.0098	1.6442	1.6114	-27.7897	-66.4538
		44.5333		0.3612	0.3531	-9.9345	-19.4662	0.3921	0.3851	-7.92075	-21.8827	0.4431	0.4261	-8.055	-30.4747	0.5451	0.5255	-10.203	-40.0065	0.5889	0.5662	-8.055	-40.275	0.6613	0.6395	-23.4937	-48.5985	0.9169	0.874	-26.1787	-66.1852	1.0538	1.0141	-29.4007	-57.7275	1.197	1.1877	-10.8743	-66.4537	1.4096	1.3923	-30.2062	-56.922	1.6399	1.6124	-33.5625	-65.1112
		44.6		0.3641	0.3536	-6.04125	-18.795	0.3898	0.3866	-11.0085	-19.869	0.4406	0.4257	-11.4113	-31.0117	0.5489	0.527	-5.1015	-37.9928	0.5861	0.5625	-11.814	-45.2422	0.6637	0.639	-20.2718	-49.2697	0.9141	0.8725	-29.9377	-68.199	1.0548	1.015	-28.0583	-56.5193	1.1926	1.1844	-16.7812	-70.884	1.4089	1.3945	-31.146	-53.9685	1.6388	1.6109	-35.0393	-67.125
		44.6667		0.3629	0.352	-7.65225	-20.943	0.3901	0.3851	-10.6058	-21.8827	0.441	0.4272	-10.8743	-28.998	0.5447	0.5235	-10.74	-42.6915	0.5879	0.5651	-9.3975	-41.7517	0.6656	0.6361	-17.721	-53.163	0.9155	0.8719	-28.0583	-69.0045	1.0599	1.0147	-21.2115	-56.922	1.1974	1.1838	-10.3373	-71.6895	1.4139	1.3906	-24.4335	-59.2043	1.6453	1.6102	-26.313	-68.0648
		44.7333		0.3631	0.355	-7.38375	-16.9155	0.3928	0.3855	-6.981	-21.3457	0.4385	0.4256	-14.2305	-31.146	0.5474	0.5231	-7.11525	-43.2285	0.5865	0.5623	-11.277	-45.5107	0.6636	0.6362	-20.406	-53.0287	0.9127	0.8735	-31.8173	-66.8565	1.0608	1.0151	-20.0032	-56.385	1.1992	1.1896	-7.92075	-63.903	1.4051	1.3873	-36.2475	-63.6345	1.643	1.6153	-29.4008	-61.218
		44.8		0.3623	0.3526	-8.45775	-20.1375	0.3915	0.3835	-8.72625	-24.0308	0.4378	0.4249	-15.1703	-32.0857	0.5456	0.5237	-9.53175	-42.423	0.5871	0.5655	-10.4715	-41.2147	0.6596	0.6405	-25.776	-47.256	0.9108	0.8741	-34.368	-66.051	1.0561	1.0159	-26.313	-55.311	1.2009	1.1884	-5.6385	-65.514	1.4137	1.388	-24.702	-62.6948	1.6405	1.6109	-32.757	-67.125
		44.8667		0.3613	0.3507	-9.80025	-22.6882	0.3912	0.3836	-9.129	-23.8965	0.4389	0.4273	-13.6935	-28.8637	0.5467	0.5257	-8.055	-39.738	0.5911	0.5624	-5.1015	-45.3765	0.6655	0.6397	-17.8552	-48.33	0.9117	0.8759	-33.1598	-63.6345	1.0585	1.0176	-23.091	-53.0287	1.1949	1.1943	-13.6935	-57.5933	1.4053	1.3883	-35.979	-62.292	1.6433	1.6101	-28.998	-68.199
		44.9333		0.3605	0.353	-10.8742	-19.6005	0.3899	0.3847	-10.8742	-22.4198	0.4378	0.4258	-15.1703	-30.8775	0.5486	0.5257	-5.50425	-39.738	0.5863	0.5641	-11.5455	-43.0942	0.6628	0.6367	-21.48	-52.3575	0.9161	0.8763	-27.2527	-63.0975	1.0534	1.0099	-29.9378	-63.366	1.2007	1.1829	-5.907	-72.8977	1.4106	1.3894	-28.8637	-60.8153	1.6344	1.6132	-40.9462	-64.0373
		45		0.3613	0.3524	-9.80025	-20.406	0.3919	0.385	-8.18925	-22.017	0.4392	0.4275	-13.2908	-28.5952	0.5439	0.5228	-11.814	-43.6312	0.5837	0.5621	-15.036	-45.7792	0.6618	0.6395	-22.8225	-48.5985	0.9111	0.8758	-33.9652	-63.7687	1.0603	1.0152	-20.6745	-56.2507	1.2009	1.1893	-5.6385	-64.3057	1.4113	1.3883	-27.924	-62.292	1.6348	1.6156	-40.4093	-60.8153
		45.0667		0.3639	0.3542	-6.30975	-17.9895	0.3941	0.3859	-5.23575	-20.8087	0.4371	0.4273	-16.11	-28.8637	0.5451	0.5249	-10.203	-40.812	0.5863	0.5608	-11.5455	-47.5245	0.6644	0.642	-19.332	-45.2422	0.9119	0.874	-32.8912	-66.1852	1.0577	1.0128	-24.165	-59.4727	1.196	1.1857	-12.2168	-69.1387	1.4108	1.3906	-28.5952	-59.2043	1.6369	1.6172	-37.59	-58.6673
		45.1333		0.3618	0.3523	-9.129	-20.5402	0.3909	0.385	-9.53175	-22.017	0.4403	0.4252	-11.814	-31.683	0.5455	0.5241	-9.666	-41.886	0.5847	0.5636	-13.6935	-43.7655	0.6623	0.6446	-22.1513	-41.7518	0.9126	0.8718	-31.9515	-69.1387	1.0565	1.0176	-25.776	-53.0287	1.2002	1.1858	-6.57825	-69.0045	1.4064	1.3929	-34.5022	-56.1165	1.6291	1.6065	-48.0615	-73.032
		45.2		0.3627	0.3533	-7.92075	-19.1977	0.3925	0.3855	-7.38375	-21.3457	0.4403	0.4268	-11.814	-29.535	0.5463	0.5231	-8.592	-43.2285	0.5885	0.5613	-8.592	-46.8532	0.6673	0.6432	-15.4388	-43.6312	0.9122	0.8739	-32.4885	-66.3195	1.055	1.0111	-27.7897	-61.755	1.1944	1.1844	-14.3648	-70.884	1.4088	1.392	-31.2802	-57.3248	1.6338	1.6127	-41.7518	-64.7085
		45.2667		0.3622	0.3522	-8.592	-20.6745	0.3927	0.384	-7.11525	-23.3595	0.4428	0.4279	-8.45775	-28.0582	0.545	0.5226	-10.3372	-43.8998	0.5869	0.5633	-10.74	-44.1682	0.6649	0.6417	-18.6607	-45.645	0.9149	0.8733	-28.8637	-67.125	1.0605	1.0152	-20.406	-56.2507	1.1957	1.1857	-12.6195	-69.1387	1.4121	1.3935	-26.85	-55.311	1.642	1.6059	-30.7432	-73.8375
		45.3333		0.3625	0.3527	-8.18925	-20.0032	0.392	0.385	-8.055	-22.017	0.4412	0.4272	-10.6058	-28.998	0.5441	0.5239	-11.5455	-42.1545	0.5842	0.5641	-14.3647	-43.0942	0.6646	0.6406	-19.0635	-47.1218	0.9108	0.8797	-34.368	-58.533	1.0585	1.0104	-23.091	-62.6947	1.1949	1.1884	-13.6935	-65.514	1.41	1.3863	-29.6692	-64.977	1.6434	1.6101	-28.8638	-68.199
		45.4		0.3638	0.3498	-6.444	-23.8965	0.392	0.3853	-8.055	-21.6143	0.4396	0.429	-12.7538	-26.5815	0.545	0.5246	-10.3372	-41.2148	0.5832	0.5618	-15.7072	-46.182	0.6638	0.6382	-20.1375	-50.3437	0.9121	0.8762	-32.6227	-63.2318	1.0544	1.0131	-28.5952	-59.07	1.1961	1.1859	-12.0825	-68.8703	1.4118	1.3894	-27.2527	-60.8153	1.6377	1.6123	-36.516	-65.2455
		45.4667		0.3617	0.3524	-9.26325	-20.406	0.3917	0.3849	-8.45775	-22.1513	0.4383	0.4256	-14.499	-31.146	0.5457	0.526	-9.3975	-39.3353	0.5874	0.561	-10.0688	-47.256	0.6653	0.6404	-18.1238	-47.3902	0.919	0.8725	-23.3595	-68.199	1.0563	1.0142	-26.0445	-57.5932	1.2001	1.1858	-6.7125	-69.0045	1.4126	1.3937	-26.1787	-55.0425	1.6369	1.6186	-37.59	-56.7877
		45.5333		0.3633	0.3513	-7.11525	-21.8827	0.3902	0.3848	-10.4715	-22.2855	0.4397	0.4259	-12.6195	-30.7432	0.5458	0.5254	-9.26325	-40.1408	0.5857	0.5617	-12.351	-46.3162	0.6632	0.6421	-20.943	-45.108	0.9125	0.8759	-32.0857	-63.6345	1.0567	1.0126	-25.5075	-59.7413	1.2014	1.1858	-4.96725	-69.0045	1.4094	1.3849	-30.4747	-66.8565	1.639	1.6168	-34.7708	-59.2043
		45.6		0.3604	0.3519	-11.0085	-21.0772	0.3923	0.3835	-7.65225	-24.0308	0.4396	0.4264	-12.7538	-30.072	0.5476	0.5255	-6.84675	-40.0065	0.5864	0.5602	-11.4112	-48.33	0.6621	0.6425	-22.4197	-44.571	0.9143	0.8736	-29.6692	-66.7223	1.0547	1.0141	-28.1925	-57.7275	1.1959	1.1881	-12.351	-65.9168	1.4081	1.389	-32.22	-61.3523	1.6296	1.6159	-47.3903	-60.4125
		45.6667		0.3623	0.3528	-8.45775	-19.869	0.3902	0.3848	-10.4715	-22.2855	0.4392	0.4256	-13.2908	-31.146	0.5472	0.5276	-7.38375	-37.1873	0.5886	0.5618	-8.45775	-46.182	0.662	0.6408	-22.554	-46.8532	0.912	0.8741	-32.757	-66.051	1.0544	1.0142	-28.5952	-57.5932	1.1983	1.1843	-9.129	-71.0183	1.4066	1.3887	-34.2337	-61.755	1.6285	1.6101	-48.867	-68.199
		45.7333		0.3603	0.3516	-11.1427	-21.48	0.39	0.3845	-10.74	-22.6883	0.4382	0.427	-14.6333	-29.2665	0.5454	0.5248	-9.80025	-40.9462	0.5862	0.566	-11.6797	-40.5435	0.6659	0.6429	-17.3182	-44.034	0.9091	0.8718	-36.6502	-69.1387	1.0587	1.0112	-22.8225	-61.6207	1.1975	1.1844	-10.203	-70.884	1.4137	1.3874	-24.702	-63.5003	1.6341	1.6064	-41.349	-73.1663
		45.8		0.3606	0.3525	-10.74	-20.2717	0.3916	0.3835	-8.592	-24.0308	0.4374	0.4252	-15.7073	-31.683	0.544	0.5239	-11.6797	-42.1545	0.5844	0.562	-14.0962	-45.9135	0.6619	0.6416	-22.6882	-45.7793	0.9121	0.8728	-32.6227	-67.7962	1.0543	1.0111	-28.7295	-61.755	1.2012	1.1826	-5.23575	-73.3005	1.4036	1.3903	-38.2613	-59.607	1.6341	1.6127	-41.349	-64.7085
		45.8667		0.3628	0.3514	-7.7865	-21.7485	0.3897	0.3843	-11.1428	-22.9568	0.4385	0.4256	-14.2305	-31.146	0.5467	0.5235	-8.055	-42.6915	0.5872	0.5638	-10.3372	-43.497	0.665	0.6458	-18.5265	-40.1407	0.9105	0.8711	-34.7707	-70.0785	1.0592	1.0115	-22.1513	-61.218	1.2028	1.1829	-3.08775	-72.8977	1.4017	1.3874	-40.812	-63.5003	1.6414	1.6074	-31.5488	-71.8238
		45.9333		0.3629	0.3522	-7.65225	-20.6745	0.3894	0.3845	-11.5455	-22.6883	0.4378	0.4251	-15.1703	-31.8172	0.546	0.5262	-8.99475	-39.0667	0.5872	0.5636	-10.3372	-43.7655	0.6643	0.6376	-19.4663	-51.1493	0.9114	0.8778	-33.5625	-61.0838	1.061	1.0131	-19.7348	-59.07	1.198	1.1812	-9.53175	-75.18	1.4098	1.3903	-29.9377	-59.607	1.6283	1.6084	-49.1355	-70.4813
		46		0.3625	0.3553	-8.18925	-16.5127	0.3905	0.3835	-10.0688	-24.0308	0.4389	0.4258	-13.6935	-30.8775	0.5445	0.526	-11.0085	-39.3353	0.5819	0.5625	-17.4525	-45.2422	0.6642	0.6401	-19.6005	-47.793	0.9058	0.8741	-41.0805	-66.051	1.0573	1.01	-24.702	-63.2317	1.1973	1.1872	-10.4715	-67.125	1.4137	1.3927	-24.702	-56.385	1.633	1.6141	-42.8257	-62.829
		46.0667		0.3641	0.3538	-6.04125	-18.5265	0.3934	0.383	-6.1755	-24.702	0.4397	0.4258	-12.6195	-30.8775	0.5453	0.524	-9.9345	-42.0203	0.5851	0.5596	-13.1565	-49.1355	0.6634	0.6382	-20.6745	-50.3437	0.9126	0.8703	-31.9515	-71.1525	1.0537	1.0137	-29.535	-58.2645	1.2028	1.1886	-3.08775	-65.2455	1.4125	1.3932	-26.313	-55.7138	1.6287	1.6101	-48.5985	-68.199
		46.1333		0.3621	0.3557	-8.72625	-15.9758	0.3919	0.3829	-8.18925	-24.8362	0.4387	0.4244	-13.962	-32.757	0.545	0.522	-10.3372	-44.7053	0.586	0.5639	-11.9482	-43.3627	0.6635	0.6406	-20.5403	-47.1218	0.9072	0.8783	-39.201	-60.4125	1.0564	1.0102	-25.9102	-62.9633	1.1988	1.1852	-8.45775	-69.81	1.414	1.39	-24.2992	-60.0098	1.6335	1.6083	-42.1545	-70.6155
		46.2		0.3624	0.3525	-8.3235	-20.2717	0.3934	0.3853	-6.1755	-21.6143	0.4367	0.4268	-16.647	-29.535	0.5439	0.5216	-11.814	-45.2423	0.5878	0.5617	-9.53175	-46.3162	0.6634	0.6372	-20.6745	-51.6862	0.9111	0.8716	-33.9652	-69.4072	1.0579	1.0139	-23.8965	-57.996	1.1949	1.183	-13.6935	-72.7635	1.4075	1.3852	-33.0255	-66.4538	1.6423	1.6116	-30.3405	-66.1853
		46.2667		0.364	0.3516	-6.1755	-21.48	0.3921	0.3837	-7.92075	-23.7622	0.4401	0.4266	-12.0825	-29.8035	0.543	0.5243	-13.0222	-41.6175	0.5869	0.5624	-10.74	-45.3765	0.6649	0.6429	-18.6607	-44.034	0.9056	0.8702	-41.349	-71.2867	1.0532	1.0174	-30.2063	-53.2972	1.1917	1.1866	-17.9895	-67.9305	1.4126	1.3894	-26.1787	-60.8153	1.6329	1.6115	-42.96	-66.3195
		46.3333		0.3616	0.3527	-9.3975	-20.0032	0.3936	0.3851	-5.907	-21.8827	0.4399	0.4249	-12.351	-32.0857	0.5478	0.5265	-6.57825	-38.664	0.5829	0.5637	-16.11	-43.6313	0.6629	0.641	-21.3457	-46.5847	0.9111	0.8709	-33.9652	-70.347	1.0595	1.014	-21.7485	-57.8617	1.1926	1.1845	-16.7812	-70.7497	1.4107	1.39	-28.7295	-60.0098	1.638	1.6127	-36.1133	-64.7085
		46.4		0.3614	0.3529	-9.666	-19.7348	0.3918	0.3844	-8.3235	-22.8225	0.4409	0.4264	-11.0085	-30.072	0.5431	0.5241	-12.888	-41.886	0.5854	0.563	-12.7537	-44.571	0.6645	0.6421	-19.1977	-45.108	0.9123	0.872	-32.3543	-68.8702	1.0555	1.0109	-27.1185	-62.0235	1.1915	1.1831	-18.258	-72.6292	1.4107	1.3931	-28.7295	-55.848	1.6429	1.6112	-29.535	-66.7223
		46.4667		0.3617	0.3527	-9.26325	-20.0032	0.3928	0.3849	-6.981	-22.1513	0.4481	0.4296	-1.3425	-25.776	0.5451	0.5224	-10.203	-44.1683	0.5851	0.5621	-13.1565	-45.7792	0.6678	0.6384	-14.7675	-50.0752	0.9079	0.8719	-38.2612	-69.0045	1.0568	1.0138	-25.3733	-58.1302	1.19	1.1847	-20.2718	-70.4813	1.4124	1.3835	-26.4472	-68.736	1.6437	1.6032	-28.461	-77.4623
		46.5333		0.3616	0.3523	-9.3975	-20.5402	0.3924	0.3854	-7.518	-21.48	0.4454	0.4245	-4.96725	-32.6227	0.5435	0.5231	-12.351	-43.2285	0.5854	0.5627	-12.7537	-44.9737	0.6614	0.6349	-23.3595	-54.774	0.9122	0.8791	-32.4885	-59.3385	1.057	1.0143	-25.1047	-57.459	1.1948	1.1883	-13.8277	-65.6482	1.4116	1.3866	-27.5213	-64.5742	1.624	1.6159	-54.9082	-60.4125
		46.6		0.3604	0.354	-11.0085	-18.258	0.3917	0.3924	-8.45775	-12.0825	0.4401	0.4249	-12.0825	-32.0857	0.5444	0.523	-11.1427	-43.3628	0.5858	0.561	-12.2168	-47.256	0.6634	0.6393	-20.6745	-48.867	0.9132	0.8691	-31.146	-72.7635	1.0591	1.0183	-22.2855	-52.089	1.1947	1.1862	-13.962	-68.4675	1.4076	1.3858	-32.8912	-65.6483	1.6428	1.6079	-29.6693	-71.1525
		46.6667		0.3611	0.353	-10.0688	-19.6005	0.3891	0.3941	-11.9483	-9.80025	0.4385	0.4269	-14.2305	-29.4007	0.5454	0.5245	-9.80025	-41.349	0.5833	0.5625	-15.573	-45.2422	0.6645	0.6398	-19.1977	-48.1957	0.9166	0.8739	-26.5815	-66.3195	1.0572	1.01	-24.8363	-63.2317	1.1994	1.1792	-7.65225	-77.865	1.4117	1.3898	-27.387	-60.2783	1.6345	1.6094	-40.812	-69.1388
		46.7333		0.361	0.3549	-10.203	-17.0498	0.3925	0.3882	-7.38375	-17.721	0.4393	0.4249	-13.1565	-32.0857	0.545	0.5228	-10.3372	-43.6312	0.5859	0.5644	-12.0825	-42.6915	0.6645	0.6408	-19.1977	-46.8532	0.9147	0.8688	-29.1323	-73.1662	1.0551	1.0151	-27.6555	-56.385	1.1976	1.1847	-10.0688	-70.4813	1.4084	1.3865	-31.8172	-64.7085	1.6334	1.6186	-42.2888	-56.7877
		46.8		0.3618	0.3541	-9.129	-18.1237	0.3927	0.3838	-7.11525	-23.628	0.4405	0.4262	-11.5455	-30.3405	0.5451	0.5256	-10.203	-39.8723	0.5873	0.5606	-10.203	-47.793	0.6599	0.6362	-25.3732	-53.0287	0.9143	0.8742	-29.6692	-65.9168	1.0552	1.0145	-27.5213	-57.1905	1.1935	1.187	-15.573	-67.3935	1.4103	1.3932	-29.2665	-55.7138	1.637	1.6066	-37.4558	-72.8978
		46.8667		0.3629	0.3546	-7.65225	-17.4525	0.3906	0.3845	-9.9345	-22.6883	0.4408	0.4254	-11.1428	-31.4145	0.5425	0.5246	-13.6935	-41.2148	0.5883	0.565	-8.8605	-41.886	0.664	0.6392	-19.869	-49.0012	0.9115	0.8725	-33.4282	-68.199	1.0571	1.0107	-24.9705	-62.292	1.1959	1.1845	-12.351	-70.7497	1.4114	1.3933	-27.7897	-55.5795	1.6479	1.6113	-22.8225	-66.588
		46.9333		0.3615	0.3529	-9.53175	-19.7348	0.392	0.3836	-8.055	-23.8965	0.4385	0.4263	-14.2305	-30.2062	0.547	0.5234	-7.65225	-42.8258	0.5862	0.5614	-11.6797	-46.719	0.6625	0.6397	-21.8827	-48.33	0.9218	0.8704	-19.6005	-71.0183	1.0576	1.0095	-24.2992	-63.903	1.197	1.1868	-10.8743	-67.662	1.4198	1.393	-16.5127	-55.9823	1.6415	1.6086	-31.4145	-70.2128
		47		0.3607	0.3515	-10.6057	-21.6142	0.3922	0.385	-7.7865	-22.017	0.4392	0.4244	-13.2908	-32.757	0.5456	0.5239	-9.53175	-42.1545	0.5892	0.5627	-7.65225	-44.9737	0.664	0.6378	-19.869	-50.8807	0.9093	0.8731	-36.3818	-67.3935	1.0567	1.0099	-25.5075	-63.366	1.2012	1.1848	-5.23575	-70.347	1.4135	1.391	-24.9705	-58.6673	1.6329	1.6063	-42.96	-73.3005
		47.0667		0.3632	0.3538	-7.2495	-18.5265	0.3903	0.3842	-10.3373	-23.091	0.4383	0.4231	-14.499	-34.5022	0.547	0.5238	-7.65225	-42.2887	0.5839	0.5607	-14.7675	-47.6587	0.6624	0.6415	-22.017	-45.9135	0.9125	0.8734	-32.0857	-66.9907	1.0543	1.0097	-28.7295	-63.6345	1.1994	1.1882	-7.65225	-65.7825	1.4078	1.3897	-32.6227	-60.4125	1.6414	1.6124	-31.5488	-65.1112
		47.1333		0.3624	0.3545	-8.3235	-17.5867	0.3909	0.3815	-9.53175	-26.7157	0.4379	0.424	-15.036	-33.294	0.5463	0.5238	-8.592	-42.2887	0.5825	0.5621	-16.647	-45.7792	0.6639	0.6367	-20.0032	-52.3575	0.9122	0.8718	-32.4885	-69.1387	1.0577	1.0094	-24.165	-64.0372	1.2011	1.1885	-5.37	-65.3798	1.4102	1.3897	-29.4008	-60.4125	1.6403	1.6053	-33.0255	-74.643
		47.2		0.3629	0.3522	-7.65225	-20.6745	0.3918	0.3843	-8.3235	-22.9568	0.4375	0.4262	-15.573	-30.3405	0.5465	0.5257	-8.3235	-39.738	0.5845	0.5623	-13.962	-45.5107	0.6646	0.6372	-19.0635	-51.6862	0.907	0.8701	-39.4695	-71.421	1.0585	1.0075	-23.091	-66.588	1.1988	1.1826	-8.45775	-73.3005	1.4106	1.3861	-28.8637	-65.2455	1.6349	1.6027	-40.275	-78.1335
		47.2667		0.3635	0.353	-6.84675	-19.6005	0.3924	0.3848	-7.518	-22.2855	0.4412	0.424	-10.6058	-33.294	0.5475	0.523	-6.981	-43.3628	0.5865	0.5628	-11.277	-44.8395	0.6617	0.6392	-22.9568	-49.0012	0.9076	0.8699	-38.664	-71.6895	1.062	1.0135	-18.3922	-58.533	1.1966	1.1774	-11.4112	-80.2815	1.4054	1.3857	-35.8447	-65.7825	1.6305	1.6041	-46.182	-76.254
		47.3333		0.3592	0.3538	-12.6195	-18.5265	0.3895	0.3848	-11.4112	-22.2855	0.4424	0.4255	-8.99475	-31.2802	0.5449	0.5218	-10.4715	-44.9737	0.5848	0.5613	-13.5593	-46.8532	0.6601	0.6379	-25.1047	-50.7465	0.913	0.8723	-31.4145	-68.4675	1.0584	1.0117	-23.2252	-60.9495	1.2015	1.184	-4.833	-71.421	1.4061	1.3837	-34.905	-68.4675	1.6397	1.6101	-33.831	-68.199
		47.4		0.3633	0.3537	-7.11525	-18.6608	0.3919	0.3828	-8.18925	-24.9705	0.4385	0.4245	-14.2305	-32.6227	0.5442	0.5259	-11.4112	-39.4695	0.5872	0.5628	-10.3372	-44.8395	0.6637	0.6392	-20.2718	-49.0012	0.9172	0.8711	-25.776	-70.0785	1.0562	1.0139	-26.1787	-57.996	1.1964	1.1866	-11.6798	-67.9305	1.4087	1.384	-31.4145	-68.0648	1.6325	1.6126	-43.497	-64.8428
		47.4667		0.3637	0.3528	-6.57825	-19.869	0.3904	0.3832	-10.203	-24.4335	0.4397	0.425	-12.6195	-31.9515	0.5421	0.5237	-14.2305	-42.423	0.5873	0.5616	-10.203	-46.4505	0.6653	0.6389	-18.1238	-49.404	0.9085	0.8713	-37.4557	-69.81	1.0547	1.0105	-28.1925	-62.5605	1.1974	1.1865	-10.3373	-68.0648	1.4127	1.3899	-26.0445	-60.144	1.6375	1.6162	-36.7845	-60.0098
		47.5333		0.3626	0.3528	-8.055	-19.869	0.3913	0.3835	-8.99475	-24.0308	0.4406	0.4238	-11.4113	-33.5625	0.5467	0.5248	-8.055	-40.9462	0.5838	0.5624	-14.9017	-45.3765	0.6624	0.6415	-22.017	-45.9135	0.9102	0.8748	-35.1735	-65.1112	1.0588	1.0141	-22.6882	-57.7275	1.202	1.1855	-4.16175	-69.4072	1.416	1.3859	-21.6142	-65.514	1.6411	1.6109	-31.9515	-67.125
		47.6		0.3614	0.3538	-9.666	-18.5265	0.3909	0.383	-9.53175	-24.702	0.4446	0.4256	-6.04125	-31.146	0.5481	0.5219	-6.1755	-44.8395	0.5859	0.5622	-12.0825	-45.645	0.6629	0.6416	-21.3457	-45.7793	0.9116	0.8735	-33.294	-66.8565	1.0565	1.0188	-25.776	-51.4177	1.1948	1.1892	-13.8277	-64.44	1.4074	1.3878	-33.1597	-62.9633	1.6339	1.6082	-41.6175	-70.7498
		47.6667		0.3615	0.3537	-9.53175	-18.6608	0.3897	0.3884	-11.1428	-17.4525	0.4436	0.4266	-7.38375	-29.8035	0.5462	0.5225	-8.72625	-44.034	0.5857	0.56	-12.351	-48.5985	0.6629	0.6397	-21.3457	-48.33	0.9085	0.8703	-37.4557	-71.1525	1.0572	1.0111	-24.8363	-61.755	1.1942	1.1821	-14.6333	-73.9718	1.4109	1.3883	-28.461	-62.292	1.6319	1.6052	-44.3025	-74.7773
		47.7333		0.361	0.3521	-10.203	-20.8087	0.3877	0.3827	-13.8278	-25.1047	0.4416	0.424	-10.0688	-33.294	0.5446	0.5209	-10.8742	-46.182	0.5846	0.563	-13.8277	-44.571	0.6657	0.6399	-17.5868	-48.0615	0.9118	0.8757	-33.0255	-63.903	1.0543	1.0151	-28.7295	-56.385	1.1984	1.1834	-8.99475	-72.2265	1.4111	1.3826	-28.1925	-69.9443	1.6315	1.6045	-44.8395	-75.717
		47.8		0.3612	0.3524	-9.9345	-20.406	0.3901	0.3847	-10.6058	-22.4198	0.4403	0.4241	-11.814	-33.1597	0.5449	0.5226	-10.4715	-43.8998	0.5831	0.5625	-15.8415	-45.2422	0.6619	0.6405	-22.6882	-47.256	0.9066	0.8684	-40.0065	-73.7033	1.0579	1.0127	-23.8965	-59.607	1.1987	1.1789	-8.592	-78.2677	1.4111	1.3865	-28.1925	-64.7085	1.6301	1.6152	-46.719	-61.3523
		47.8667		0.3608	0.3549	-10.4715	-17.0498	0.3901	0.3856	-10.6058	-21.2115	0.4415	0.4246	-10.203	-32.4885	0.5463	0.5264	-8.592	-38.7983	0.585	0.5615	-13.2907	-46.5847	0.6659	0.6381	-17.3182	-50.478	0.9079	0.8705	-38.2612	-70.884	1.054	1.0091	-29.1322	-64.44	1.2024	1.1809	-3.62475	-75.5827	1.407	1.3871	-33.6967	-63.903	1.6444	1.6075	-27.5213	-71.6895
		47.9333		0.3601	0.3545	-11.4112	-17.5867	0.392	0.3849	-8.055	-22.1513	0.4379	0.425	-15.036	-31.9515	0.5461	0.5244	-8.8605	-41.4833	0.5883	0.5629	-8.8605	-44.7052	0.6622	0.6375	-22.2855	-51.2835	0.91	0.8675	-35.442	-74.9115	1.0585	1.0148	-23.091	-56.7877	1.1958	1.1828	-12.4853	-73.032	1.4134	1.3853	-25.1047	-66.3195	1.6343	1.6139	-41.0805	-63.0975
		48		0.362	0.3543	-8.8605	-17.8552	0.3919	0.3865	-8.18925	-20.0032	0.4408	0.424	-11.1428	-33.294	0.5445	0.5229	-11.0085	-43.497	0.5857	0.5603	-12.351	-48.1957	0.662	0.6399	-22.554	-48.0615	0.9083	0.8695	-37.7242	-72.2265	1.056	1.0097	-26.4472	-63.6345	1.2007	1.1828	-5.907	-73.032	1.4022	1.3831	-40.1408	-69.273	1.6312	1.6117	-45.2423	-66.051
		48.0667		0.3618	0.3523	-9.129	-20.5402	0.3919	0.3864	-8.18925	-20.1375	0.439	0.4241	-13.5593	-33.1597	0.5448	0.524	-10.6057	-42.0203	0.5848	0.5593	-13.5593	-49.5382	0.6607	0.6379	-24.2993	-50.7465	0.9123	0.8685	-32.3543	-73.569	1.0522	1.0167	-31.5487	-54.237	1.1925	1.1832	-16.9155	-72.495	1.413	1.3826	-25.6417	-69.9443	1.6353	1.6117	-39.738	-66.051
		48.1333		0.3608	0.3522	-10.4715	-20.6745	0.3906	0.3832	-9.9345	-24.4335	0.4382	0.4261	-14.6333	-30.4747	0.5478	0.5225	-6.57825	-44.034	0.5837	0.5627	-15.036	-44.9737	0.662	0.6398	-22.554	-48.1957	0.9098	0.8709	-35.7105	-70.347	1.0537	1.0136	-29.535	-58.3987	1.2018	1.1823	-4.43025	-73.7033	1.4044	1.3879	-37.1872	-62.829	1.6345	1.6095	-40.812	-69.0045
		48.2		0.362	0.3539	-8.8605	-18.3922	0.3911	0.3862	-9.26325	-20.406	0.4396	0.4258	-12.7538	-30.8775	0.5446	0.5246	-10.8742	-41.2148	0.5842	0.5628	-14.3647	-44.8395	0.6606	0.6397	-24.4335	-48.33	0.9114	0.8754	-33.5625	-64.3057	1.0585	1.0088	-23.091	-64.8427	1.197	1.1788	-10.8743	-78.402	1.4114	1.389	-27.7897	-61.3523	1.6314	1.6074	-44.9738	-71.8238
		48.2667		0.3612	0.3527	-9.9345	-20.0032	0.3898	0.3856	-11.0085	-21.2115	0.4382	0.425	-14.6333	-31.9515	0.545	0.5235	-10.3372	-42.6915	0.5844	0.5637	-14.0962	-43.6313	0.6608	0.6418	-24.165	-45.5107	0.9106	0.8681	-34.6365	-74.106	1.0581	1.0093	-23.628	-64.1715	1.199	1.182	-8.18925	-74.106	1.4	1.3916	-43.0942	-57.8618	1.6327	1.6076	-43.2285	-71.5553
		48.3333		0.3609	0.3543	-10.3372	-17.8552	0.3911	0.3848	-9.26325	-22.2855	0.4388	0.4227	-13.8278	-35.0392	0.5451	0.5262	-10.203	-39.0667	0.5846	0.5621	-13.8277	-45.7792	0.6613	0.639	-23.4937	-49.2697	0.9089	0.8668	-36.9187	-75.8512	1.0607	1.0061	-20.1375	-68.4675	1.1967	1.1819	-11.277	-74.2403	1.4098	1.3895	-29.9377	-60.681	1.637	1.6065	-37.4558	-73.032
		48.4		0.3633	0.353	-7.11525	-19.6005	0.391	0.3817	-9.3975	-26.4473	0.4463	0.4258	-3.759	-30.8775	0.5466	0.5236	-8.18925	-42.5573	0.584	0.5586	-14.6332	-50.478	0.6638	0.6399	-20.1375	-48.0615	0.9094	0.8706	-36.2475	-70.7497	1.0563	1.0132	-26.0445	-58.9357	1.192	1.1809	-17.5868	-75.5827	1.4109	1.3839	-28.461	-68.199	1.641	1.6113	-32.0858	-66.588
		48.4667		0.3627	0.3541	-7.92075	-18.1237	0.3925	0.3828	-7.38375	-24.9705	0.4384	0.4253	-14.3648	-31.5487	0.5463	0.5216	-8.592	-45.2423	0.5834	0.563	-15.4388	-44.571	0.6642	0.6425	-19.6005	-44.571	0.9071	0.8703	-39.3352	-71.1525	1.0547	1.0135	-28.1925	-58.533	1.1954	1.1827	-13.0222	-73.1662	1.4134	1.3897	-25.1047	-60.4125	1.6325	1.6082	-43.497	-70.7498
		48.5333		0.3621	0.3523	-8.72625	-20.5402	0.3933	0.3825	-6.30975	-25.3732	0.4394	0.4254	-13.0222	-31.4145	0.5468	0.5235	-7.92075	-42.6915	0.5842	0.56	-14.3647	-48.5985	0.6625	0.6363	-21.8827	-52.8945	0.9125	0.8692	-32.0857	-72.6293	1.0591	1.0095	-22.2855	-63.903	1.2001	1.1864	-6.7125	-68.199	1.4082	1.3826	-32.0858	-69.9443	1.6352	1.6098	-39.8722	-68.6018
		48.6		0.3617	0.3517	-9.26325	-21.3458	0.3899	0.3825	-10.8742	-25.3732	0.4396	0.4224	-12.7538	-35.442	0.5424	0.5209	-13.8277	-46.182	0.5881	0.5619	-9.129	-46.0477	0.662	0.6376	-22.554	-51.1493	0.9082	0.8673	-37.8585	-75.18	1.0552	1.0093	-27.5213	-64.1715	1.1959	1.1825	-12.351	-73.4347	1.4106	1.3863	-28.8637	-64.977	1.6346	1.6059	-40.6777	-73.8375
		48.6667		0.3603	0.3512	-11.1427	-22.017	0.3897	0.384	-11.1428	-23.3595	0.4375	0.4266	-15.573	-29.8035	0.5456	0.5244	-9.53175	-41.4833	0.5868	0.5608	-10.8742	-47.5245	0.6605	0.6421	-24.5677	-45.108	0.9143	0.8648	-29.6692	-78.5362	1.0521	1.0063	-31.683	-68.199	1.1937	1.1819	-15.3045	-74.2403	1.4045	1.385	-37.053	-66.7223	1.6351	1.6025	-40.0065	-78.402
		48.7333		0.3608	0.3516	-10.4715	-21.48	0.3923	0.3856	-7.65225	-21.2115	0.4389	0.4244	-13.6935	-32.757	0.545	0.5221	-10.3372	-44.571	0.5842	0.5629	-14.3647	-44.7052	0.6629	0.635	-21.3457	-54.6397	0.9099	0.8718	-35.5762	-69.1387	1.0589	1.0161	-22.554	-55.0425	1.1958	1.1803	-12.4853	-76.3882	1.4037	1.3796	-38.127	-73.9718	1.6322	1.6139	-43.8998	-63.0975
		48.8		0.3618	0.3515	-9.129	-21.6142	0.3906	0.3844	-9.9345	-22.8225	0.4377	0.4237	-15.3045	-33.6967	0.5437	0.525	-12.0825	-40.6778	0.5848	0.5617	-13.5593	-46.3162	0.6638	0.6348	-20.1375	-54.9082	0.9085	0.8689	-37.4557	-73.032	1.0558	1.0095	-26.7157	-63.903	1.1962	1.1775	-11.9483	-80.1472	1.4112	1.3812	-28.0582	-71.8238	1.6368	1.6079	-37.7243	-71.1525
		48.8667		0.363	0.3528	-7.518	-19.869	0.3909	0.3829	-9.53175	-24.8362	0.4401	0.4242	-12.0825	-33.0255	0.5449	0.5238	-10.4715	-42.2887	0.5861	0.559	-11.814	-49.941	0.6647	0.6365	-18.9293	-52.626	0.9118	0.8684	-33.0255	-73.7033	1.0579	1.0103	-23.8965	-62.829	1.1934	1.1858	-15.7072	-69.0045	1.4059	1.3861	-35.1735	-65.2455	1.632	1.6006	-44.1683	-80.9528
		48.9333		0.3612	0.3538	-9.9345	-18.5265	0.3921	0.3833	-7.92075	-24.2993	0.4394	0.4261	-13.0222	-30.4747	0.5445	0.5238	-11.0085	-42.2887	0.5863	0.5611	-11.5455	-47.1217	0.6632	0.6366	-20.943	-52.4917	0.9057	0.8726	-41.2148	-68.0648	1.0606	1.0089	-20.2718	-64.7085	1.1957	1.1816	-12.6195	-74.643	1.4066	1.3959	-34.2337	-52.089	1.6362	1.6065	-38.5298	-73.032
		49		0.3618	0.3529	-9.129	-19.7348	0.3921	0.3825	-7.92075	-25.3732	0.4385	0.4235	-14.2305	-33.9652	0.5459	0.5202	-9.129	-47.1218	0.5855	0.5594	-12.6195	-49.404	0.6607	0.6358	-24.2993	-53.5657	0.9087	0.8674	-37.1872	-75.0457	1.0521	1.0076	-31.683	-66.4537	1.1947	1.1899	-13.962	-63.5003	1.4064	1.3856	-34.5022	-65.9168	1.6397	1.6052	-33.831	-74.7773
		49.0667		0.3618	0.3534	-9.129	-19.0635	0.3914	0.384	-8.8605	-23.3595	0.4421	0.4256	-9.3975	-31.146	0.5455	0.5204	-9.666	-46.8533	0.5884	0.5628	-8.72625	-44.8395	0.6622	0.6378	-22.2855	-50.8807	0.9072	0.8667	-39.201	-75.9855	1.0574	1.0104	-24.5678	-62.6947	1.1981	1.184	-9.3975	-71.421	1.4107	1.3848	-28.7295	-66.9908	1.642	1.6101	-30.7432	-68.199
		49.1333		0.3632	0.3534	-7.2495	-19.0635	0.3914	0.3821	-8.8605	-25.9103	0.4396	0.4257	-12.7538	-31.0117	0.5466	0.523	-8.18925	-43.3628	0.5853	0.5613	-12.888	-46.8532	0.6636	0.6405	-20.406	-47.256	0.9046	0.8691	-42.6915	-72.7635	1.0541	1.0138	-28.998	-58.1302	1.2	1.1859	-6.84675	-68.8703	1.4069	1.388	-33.831	-62.6948	1.6355	1.6103	-39.4695	-67.9305
		49.2		0.3608	0.3526	-10.4715	-20.1375	0.3886	0.383	-12.6195	-24.702	0.4391	0.4231	-13.425	-34.5022	0.545	0.5253	-10.3372	-40.275	0.5841	0.5593	-14.499	-49.5382	0.6622	0.6387	-22.2855	-49.6725	0.9084	0.869	-37.59	-72.8978	1.0511	1.0066	-33.0255	-67.7962	1.1971	1.1861	-10.74	-68.6018	1.4121	1.3869	-26.85	-64.1715	1.632	1.6065	-44.1683	-73.032
		49.2667		0.3621	0.3518	-8.72625	-21.2115	0.3883	0.3845	-13.0223	-22.6883	0.4401	0.4261	-12.0825	-30.4747	0.5443	0.5257	-11.277	-39.738	0.5875	0.5603	-9.9345	-48.1957	0.6646	0.6388	-19.0635	-49.5382	0.9131	0.8708	-31.2802	-70.4812	1.0558	1.0078	-26.7157	-66.1852	1.2026	1.185	-3.35625	-70.0785	1.4079	1.3892	-32.4885	-61.0838	1.6458	1.6077	-25.6418	-71.421
		49.3333		0.3626	0.3539	-8.055	-18.3922	0.3911	0.384	-9.26325	-23.3595	0.4385	0.4256	-14.2305	-31.146	0.5439	0.5244	-11.814	-41.4833	0.5863	0.5624	-11.5455	-45.3765	0.6622	0.6396	-22.2855	-48.4642	0.9093	0.8735	-36.3818	-66.8565	1.0531	1.0101	-30.3405	-63.0975	1.1986	1.1844	-8.72625	-70.884	1.412	1.3902	-26.9842	-59.7413	1.6353	1.616	-39.738	-60.2783
		49.4		0.3621	0.3535	-8.72625	-18.9292	0.39	0.3824	-10.74	-25.5075	0.4389	0.427	-13.6935	-29.2665	0.5444	0.5235	-11.1427	-42.6915	0.5847	0.5592	-13.6935	-49.6725	0.6658	0.6409	-17.4525	-46.719	0.9155	0.8685	-28.0583	-73.569	1.0534	1.0112	-29.9378	-61.6207	1.193	1.1875	-16.2443	-66.7223	1.4114	1.3837	-27.7897	-68.4675	1.6338	1.6115	-41.7518	-66.3195
		49.4667		0.3625	0.3554	-8.18925	-16.3785	0.3918	0.3831	-8.3235	-24.5677	0.439	0.4265	-13.5593	-29.9377	0.5454	0.5247	-9.80025	-41.0805	0.5837	0.5617	-15.036	-46.3162	0.6651	0.6384	-18.3922	-50.0752	0.9143	0.8725	-29.6692	-68.199	1.0548	1.0098	-28.0583	-63.5002	1.2012	1.1835	-5.23575	-72.0922	1.4039	1.3857	-37.8585	-65.7825	1.6352	1.6038	-39.8722	-76.6568
		49.5333		0.3648	0.3526	-5.1015	-20.1375	0.3919	0.3829	-8.18925	-24.8362	0.4381	0.4274	-14.7675	-28.7295	0.5457	0.5237	-9.3975	-42.423	0.5851	0.5635	-13.1565	-43.8997	0.6636	0.6377	-20.406	-51.015	0.9154	0.8705	-28.1925	-70.884	1.0543	1.0073	-28.7295	-66.8565	1.1918	1.1834	-17.8553	-72.2265	1.4033	1.3878	-38.664	-62.9633	1.6322	1.608	-43.8998	-71.0183
		49.6		0.3636	0.3508	-6.7125	-22.554	0.3909	0.3834	-9.53175	-24.165	0.4394	0.4291	-13.0222	-26.4472	0.5446	0.5225	-10.8742	-44.034	0.586	0.5597	-11.9482	-49.0013	0.6631	0.6409	-21.0772	-46.719	0.9125	0.8674	-32.0857	-75.0457	1.051	1.0101	-33.1598	-63.0975	1.1996	1.1835	-7.38375	-72.0922	1.4078	1.384	-32.6227	-68.0648	1.6287	1.6084	-48.5985	-70.4813
		49.6667		0.3636	0.3521	-6.7125	-20.8087	0.3912	0.3818	-9.129	-26.313	0.4387	0.4248	-13.962	-32.22	0.5432	0.5228	-12.7537	-43.6312	0.5876	0.5636	-9.80025	-43.7655	0.6655	0.641	-17.8552	-46.5847	0.9048	0.8711	-42.423	-70.0785	1.052	1.0093	-31.8173	-64.1715	1.1931	1.1819	-16.11	-74.2403	1.4063	1.3883	-34.6365	-62.292	1.6333	1.604	-42.423	-76.3883
		49.7333		0.3617	0.3529	-9.26325	-19.7348	0.3889	0.3836	-12.2168	-23.8965	0.4366	0.424	-16.7813	-33.294	0.5442	0.5246	-11.4112	-41.2148	0.5877	0.5583	-9.666	-50.8807	0.6644	0.6371	-19.332	-51.8205	0.9093	0.8703	-36.3818	-71.1525	1.058	1.008	-23.7622	-65.9167	1.1937	1.1837	-15.3045	-71.8238	1.4139	1.3875	-24.4335	-63.366	1.6315	1.6069	-44.8395	-72.495
		49.8		0.3626	0.3524	-8.055	-20.406	0.3896	0.3852	-11.277	-21.7485	0.4376	0.4257	-15.4388	-31.0117	0.546	0.5226	-8.99475	-43.8998	0.5824	0.5603	-16.7812	-48.1957	0.6594	0.6357	-26.0445	-53.7	0.9111	0.8741	-33.9652	-66.051	1.051	1.0111	-33.1598	-61.755	1.1915	1.1808	-18.258	-75.717	1.4058	1.3882	-35.3077	-62.4263	1.6287	1.606	-48.5985	-73.7033
		49.8667		0.3603	0.3507	-11.1427	-22.6882	0.3902	0.3829	-10.4715	-24.8362	0.439	0.426	-13.5593	-30.609	0.5439	0.5252	-11.814	-40.4092	0.5879	0.5624	-9.3975	-45.3765	0.6645	0.6344	-19.1977	-55.4452	0.9087	0.8706	-37.1872	-70.7497	1.0589	1.008	-22.554	-65.9167	1.2022	1.1822	-3.89325	-73.8375	1.4048	1.3837	-36.6502	-68.4675	1.6287	1.6049	-48.5985	-75.18
		49.9333		0.3615	0.3522	-9.53175	-20.6745	0.3924	0.3839	-7.518	-23.4937	0.4376	0.4244	-15.4388	-32.757	0.5458	0.5263	-9.26325	-38.9325	0.586	0.5577	-11.9482	-51.6862	0.6623	0.6349	-22.1513	-54.774	0.9199	0.8645	-22.1512	-78.939	1.0568	1.0065	-25.3733	-67.9305	1.1909	1.1917	-19.0635	-61.0838	1.4074	1.3837	-33.1597	-68.4675	1.6372	1.6066	-37.1872	-72.8978
		50		0.3598	0.3512	-11.814	-22.017	0.391	0.384	-9.3975	-23.3595	0.4391	0.4233	-13.425	-34.2337	0.5447	0.5229	-10.74	-43.497	0.5839	0.5591	-14.7675	-49.8067	0.6607	0.6365	-24.2993	-52.626	0.9097	0.8671	-35.8447	-75.4485	1.0567	1.009	-25.5075	-64.5742	1.1952	1.1906	-13.2908	-62.5605	1.4086	1.3847	-31.5487	-67.125	1.634	1.6027	-41.4833	-78.1335
		50.0667		0.362	0.3519	-8.8605	-21.0772	0.3917	0.3814	-8.45775	-26.85	0.4396	0.4254	-12.7538	-31.4145	0.5442	0.5234	-11.4112	-42.8258	0.5874	0.5598	-10.0688	-48.867	0.6632	0.6359	-20.943	-53.4315	0.9081	0.8649	-37.9927	-78.402	1.0588	1.008	-22.6882	-65.9167	1.1959	1.1848	-12.351	-70.347	1.4054	1.3935	-35.8447	-55.311	1.6301	1.613	-46.719	-64.3058
		50.1333		0.3598	0.3538	-11.814	-18.5265	0.3933	0.3827	-6.30975	-25.1047	0.4403	0.4237	-11.814	-33.6967	0.5445	0.5238	-11.0085	-42.2887	0.5878	0.558	-9.53175	-51.2835	0.6632	0.6357	-20.943	-53.7	0.9029	0.8688	-44.9737	-73.1662	1.0501	1.0103	-34.368	-62.829	1.1999	1.1854	-6.981	-69.5415	1.4056	1.3883	-35.5763	-62.292	1.6303	1.6122	-46.4505	-65.3798
		50.2		0.3633	0.3517	-7.11525	-21.3458	0.3914	0.381	-8.8605	-27.387	0.4387	0.4222	-13.962	-35.7105	0.5451	0.5234	-10.203	-42.8258	0.5843	0.5584	-14.2305	-50.7465	0.6641	0.6432	-19.7347	-43.6312	0.9122	0.867	-32.4885	-75.5828	1.0542	1.007	-28.8637	-67.2593	1.2029	1.1856	-2.9535	-69.273	1.4114	1.3814	-27.7897	-71.5553	1.6385	1.6104	-35.442	-67.7963
		50.2667		0.3627	0.355	-7.92075	-16.9155	0.3913	0.3826	-8.99475	-25.239	0.4392	0.4231	-13.2908	-34.5022	0.5435	0.5222	-12.351	-44.4367	0.5885	0.5605	-8.592	-47.9272	0.662	0.6376	-22.554	-51.1493	0.9203	0.8708	-21.6143	-70.4812	1.0568	1.0095	-25.3733	-63.903	1.195	1.1754	-13.5593	-82.9665	1.4021	1.3857	-40.275	-65.7825	1.6336	1.6099	-42.0203	-68.4675
		50.3333		0.3613	0.3537	-9.80025	-18.6608	0.392	0.3821	-8.055	-25.9103	0.438	0.4224	-14.9018	-35.442	0.5438	0.5224	-11.9483	-44.1683	0.5864	0.5597	-11.4112	-49.0013	0.6653	0.6343	-18.1238	-55.5795	0.913	0.8673	-31.4145	-75.18	1.0537	1.0107	-29.535	-62.292	1.2012	1.1809	-5.23575	-75.5827	1.4132	1.3806	-25.3732	-72.6292	1.6263	1.6007	-51.8205	-80.8185
		50.4		0.362	0.352	-8.8605	-20.943	0.3919	0.3841	-8.18925	-23.2252	0.4364	0.4233	-17.0498	-34.2337	0.5452	0.5234	-10.0687	-42.8258	0.5846	0.5618	-13.8277	-46.182	0.6606	0.6334	-24.4335	-56.7877	0.9157	0.868	-27.7898	-74.2403	1.0554	1.011	-27.2528	-61.8892	1.1903	1.1834	-19.869	-72.2265	1.4063	1.3872	-34.6365	-63.7688	1.6306	1.6204	-46.0478	-54.3713
		50.4667		0.3623	0.3512	-8.45775	-22.017	0.3914	0.3837	-8.8605	-23.7622	0.4389	0.4253	-13.6935	-31.5487	0.5439	0.5228	-11.814	-43.6312	0.5821	0.5591	-17.184	-49.8067	0.6612	0.6354	-23.628	-54.1027	0.9076	0.8695	-38.664	-72.2265	1.0521	1.0111	-31.683	-61.755	1.1942	1.1805	-14.6333	-76.1198	1.4076	1.3861	-32.8912	-65.2455	1.6335	1.6106	-42.1545	-67.5278
		50.5333		0.3608	0.3528	-10.4715	-19.869	0.393	0.3836	-6.7125	-23.8965	0.438	0.425	-14.9018	-31.9515	0.5453	0.5237	-9.9345	-42.423	0.5844	0.5621	-14.0962	-45.7792	0.663	0.639	-21.2115	-49.2697	0.9071	0.8709	-39.3352	-70.347	1.0538	1.0091	-29.4007	-64.44	1.1949	1.1818	-13.6935	-74.3745	1.4107	1.3935	-28.7295	-55.311	1.6345	1.6019	-40.812	-79.2075
		50.6		0.3643	0.3518	-5.77275	-21.2115	0.3904	0.3825	-10.203	-25.3732	0.4353	0.422	-18.5265	-35.979	0.5477	0.5223	-6.7125	-44.3025	0.5853	0.5604	-12.888	-48.0615	0.664	0.6326	-19.869	-57.8617	0.9062	0.872	-40.5435	-68.8702	1.0529	1.01	-30.609	-63.2317	1.197	1.1838	-10.8743	-71.6895	1.4086	1.3827	-31.5487	-69.81	1.6327	1.6047	-43.2285	-75.4485
		50.6667		0.3632	0.3514	-7.2495	-21.7485	0.3909	0.3844	-9.53175	-22.8225	0.4402	0.4234	-11.9483	-34.0995	0.5438	0.5233	-11.9483	-42.96	0.5818	0.5623	-17.5868	-45.5107	0.6627	0.6348	-21.6143	-54.9082	0.9099	0.8693	-35.5762	-72.495	1.0536	1.0086	-29.6692	-65.1112	1.2007	1.1808	-5.907	-75.717	1.4016	1.3806	-40.9462	-72.6292	1.6394	1.6031	-34.2338	-77.5965
		50.7333		0.3618	0.3506	-9.129	-22.8225	0.3894	0.3835	-11.5455	-24.0308	0.4386	0.4255	-14.0963	-31.2802	0.5433	0.5239	-12.6195	-42.1545	0.5851	0.5573	-13.1565	-52.2232	0.6621	0.6355	-22.4197	-53.9685	0.9124	0.8667	-32.22	-75.9855	1.0509	1.0113	-33.294	-61.4865	1.2026	1.1803	-3.35625	-76.3882	1.4054	1.3813	-35.8447	-71.6895	1.6276	1.6093	-50.0753	-69.273
		50.8		0.3629	0.3508	-7.65225	-22.554	0.3903	0.3835	-10.3373	-24.0308	0.4386	0.4227	-14.0963	-35.0392	0.5458	0.5251	-9.26325	-40.5435	0.5882	0.5582	-8.99475	-51.015	0.6618	0.6398	-22.8225	-48.1957	0.9091	0.8671	-36.6502	-75.4485	1.0559	1.005	-26.5815	-69.9443	1.1921	1.1792	-17.4525	-77.865	1.4145	1.3818	-23.628	-71.0183	1.6368	1.6043	-37.7243	-75.9855
		50.8667		0.3596	0.3526	-12.0825	-20.1375	0.3909	0.3836	-9.53175	-23.8965	0.4398	0.4214	-12.4853	-36.7845	0.5432	0.5241	-12.7537	-41.886	0.5837	0.5595	-15.036	-49.2697	0.6621	0.637	-22.4197	-51.9547	0.9046	0.8693	-42.6915	-72.495	1.0517	1.0137	-32.22	-58.2645	1.199	1.1787	-8.18925	-78.5362	1.4095	1.378	-30.3405	-76.1198	1.6396	1.6044	-33.9653	-75.8513
		50.9333		0.3609	0.3527	-10.3372	-20.0032	0.3924	0.3814	-7.518	-26.85	0.4411	0.4232	-10.74	-34.368	0.5491	0.5254	-4.833	-40.1408	0.5896	0.559	-7.11525	-49.941	0.6646	0.634	-19.0635	-55.9822	0.9117	0.8639	-33.1598	-79.7445	1.0562	1.0039	-26.1787	-71.421	1.1992	1.1765	-7.92075	-81.4897	1.4062	1.3862	-34.7708	-65.1113	1.6366	1.6065	-37.9927	-73.032
		51		0.361	0.3522	-10.203	-20.6745	0.3914	0.3829	-8.8605	-24.8362	0.437	0.4239	-16.2443	-33.4282	0.5448	0.5239	-10.6057	-42.1545	0.5877	0.5596	-9.666	-49.1355	0.6616	0.6378	-23.091	-50.8807	0.9088	0.8707	-37.053	-70.6155	1.0554	1.0105	-27.2528	-62.5605	1.2	1.1821	-6.84675	-73.9718	1.4051	1.3849	-36.2475	-66.8565	1.6284	1.6077	-49.0013	-71.421
		51.0667		0.361	0.3536	-10.203	-18.795	0.3907	0.3835	-9.80025	-24.0308	0.4389	0.4214	-13.6935	-36.7845	0.5471	0.523	-7.518	-43.3628	0.585	0.5605	-13.2907	-47.9272	0.6655	0.6373	-17.8552	-51.552	0.9054	0.8658	-41.6175	-77.1937	1.052	1.0094	-31.8173	-64.0372	1.1951	1.1802	-13.425	-76.5225	1.405	1.3862	-36.3817	-65.1113	1.6397	1.6079	-33.831	-71.1525
		51.1333		0.3611	0.3531	-10.0688	-19.4662	0.3931	0.3834	-6.57825	-24.165	0.4377	0.4252	-15.3045	-31.683	0.5427	0.5239	-13.425	-42.1545	0.584	0.5584	-14.6332	-50.7465	0.6625	0.6384	-21.8827	-50.0752	0.9091	0.8694	-36.6502	-72.3608	1.0524	1.0079	-31.2802	-66.051	1.194	1.1841	-14.9018	-71.2868	1.4038	1.3806	-37.9927	-72.6292	1.6349	1.6043	-40.275	-75.9855
		51.2		0.362	0.3508	-8.8605	-22.554	0.3934	0.3824	-6.1755	-25.5075	0.4361	0.4251	-17.4525	-31.8172	0.5442	0.5256	-11.4112	-39.8723	0.587	0.5599	-10.6057	-48.7327	0.6592	0.6385	-26.313	-49.941	0.9125	0.8647	-32.0857	-78.6705	1.0574	1.0097	-24.5678	-63.6345	1.199	1.1763	-8.18925	-81.7583	1.4075	1.3869	-33.0255	-64.1715	1.6396	1.6032	-33.9653	-77.4623
		51.2667		0.3617	0.3513	-9.26325	-21.8827	0.3916	0.3826	-8.592	-25.239	0.4391	0.4242	-13.425	-33.0255	0.5444	0.5239	-11.1427	-42.1545	0.5886	0.5584	-8.45775	-50.7465	0.6664	0.6349	-16.647	-54.774	0.9124	0.8653	-32.22	-77.865	1.0542	1.0067	-28.8637	-67.662	1.1997	1.1861	-7.2495	-68.6018	1.4138	1.3826	-24.5677	-69.9443	1.6409	1.6021	-32.22	-78.939
		51.3333		0.3606	0.3525	-10.74	-20.2717	0.3919	0.3853	-8.18925	-21.6143	0.4457	0.424	-4.5645	-33.294	0.5421	0.5239	-14.2305	-42.1545	0.5888	0.5608	-8.18925	-47.5245	0.663	0.6332	-21.2115	-57.0562	0.9156	0.8675	-27.924	-74.9115	1.0601	1.0083	-20.943	-65.514	1.1971	1.1799	-10.74	-76.9253	1.406	1.3855	-35.0392	-66.051	1.6407	1.6058	-32.4885	-73.9718
		51.4		0.3623	0.3522	-8.45775	-20.6745	0.3919	0.3827	-8.18925	-25.1047	0.4454	0.4209	-4.96725	-37.4557	0.5459	0.5232	-9.129	-43.0942	0.5875	0.5594	-9.9345	-49.404	0.6637	0.635	-20.2718	-54.6397	0.9084	0.8647	-37.59	-78.6705	1.0531	1.0103	-30.3405	-62.829	1.1896	1.1821	-20.8088	-73.9718	1.4101	1.3867	-29.535	-64.44	1.6346	1.6112	-40.6777	-66.7223
		51.4667		0.3611	0.3503	-10.0688	-23.2252	0.3911	0.383	-9.26325	-24.702	0.4398	0.4236	-12.4853	-33.831	0.547	0.5249	-7.65225	-40.812	0.584	0.5643	-14.6332	-42.8257	0.6608	0.6365	-24.165	-52.626	0.909	0.8657	-36.7845	-77.328	1.0534	1.0116	-29.9378	-61.0837	1.1962	1.1771	-11.9483	-80.6842	1.417	1.3823	-20.2717	-70.347	1.633	1.6066	-42.8257	-72.8978
		51.5333		0.3608	0.3529	-10.4715	-19.7348	0.3916	0.3812	-8.592	-27.1185	0.4392	0.4234	-13.2908	-34.0995	0.5416	0.5248	-14.9017	-40.9462	0.5866	0.5623	-11.1427	-45.5107	0.6596	0.637	-25.776	-51.9547	0.9078	0.8632	-38.3955	-80.6843	1.0563	1.0065	-26.0445	-67.9305	1.1977	1.177	-9.9345	-80.8185	1.4089	1.3869	-31.146	-64.1715	1.6315	1.6032	-44.8395	-77.4623
		51.6		0.3605	0.3507	-10.8742	-22.6882	0.392	0.383	-8.055	-24.702	0.4404	0.4262	-11.6798	-30.3405	0.5426	0.5242	-13.5592	-41.7518	0.5878	0.5626	-9.53175	-45.108	0.6599	0.6379	-25.3732	-50.7465	0.9086	0.8654	-37.3215	-77.7307	1.0541	1.0106	-28.998	-62.4262	1.1924	1.1798	-17.0498	-77.0595	1.4101	1.3908	-29.535	-58.9358	1.6321	1.6143	-44.034	-62.5605
		51.6667		0.3623	0.3535	-8.45775	-18.9292	0.3908	0.3819	-9.666	-26.1787	0.4412	0.4236	-10.6058	-33.831	0.5454	0.5252	-9.80025	-40.4092	0.5841	0.5617	-14.499	-46.3162	0.6646	0.6404	-19.0635	-47.3902	0.912	0.8699	-32.757	-71.6895	1.0516	1.0086	-32.3542	-65.1112	1.1954	1.1809	-13.0222	-75.5827	1.4062	1.386	-34.7708	-65.3798	1.6348	1.606	-40.4093	-73.7033
		51.7333		0.3616	0.3528	-9.3975	-19.869	0.3905	0.3826	-10.0688	-25.239	0.4371	0.4217	-16.11	-36.3817	0.5476	0.5234	-6.84675	-42.8258	0.5852	0.5613	-13.0222	-46.8532	0.6615	0.6327	-23.2252	-57.7275	0.9077	0.8675	-38.5297	-74.9115	1.0561	1.0094	-26.313	-64.0372	1.1902	1.1752	-20.0033	-83.235	1.4089	1.3865	-31.146	-64.7085	1.6339	1.6123	-41.6175	-65.2455
		51.8		0.36	0.3517	-11.5455	-21.3458	0.3901	0.3825	-10.6058	-25.3732	0.4364	0.4229	-17.0498	-34.7707	0.5425	0.5232	-13.6935	-43.0942	0.5878	0.56	-9.53175	-48.5985	0.665	0.6333	-18.5265	-56.922	0.9098	0.8663	-35.7105	-76.5225	1.0537	1.0092	-29.535	-64.3057	1.1973	1.1746	-10.4715	-84.0405	1.4084	1.3834	-31.8172	-68.8703	1.6359	1.6074	-38.9325	-71.8238
		51.8667		0.3624	0.3539	-8.3235	-18.3922	0.3906	0.3833	-9.9345	-24.2993	0.439	0.4237	-13.5593	-33.6967	0.5455	0.523	-9.666	-43.3628	0.5854	0.5587	-12.7537	-50.3438	0.6641	0.6342	-19.7347	-55.7138	0.9058	0.8677	-41.0805	-74.643	1.0517	1.0102	-32.22	-62.9633	1.1963	1.1802	-11.814	-76.5225	1.4109	1.3788	-28.461	-75.0458	1.6305	1.6068	-46.182	-72.6293
		51.9333		0.3622	0.3541	-8.592	-18.1237	0.3903	0.3839	-10.3373	-23.4937	0.4397	0.422	-12.6195	-35.979	0.5471	0.5234	-7.518	-42.8258	0.587	0.5577	-10.6057	-51.6862	0.6611	0.6381	-23.7622	-50.478	0.9067	0.866	-39.8723	-76.9253	1.0571	1.0069	-24.9705	-67.3935	1.1977	1.1861	-9.9345	-68.6018	1.4131	1.3791	-25.5075	-74.643	1.6353	1.6012	-39.738	-80.1473
		52		0.3614	0.3544	-9.666	-17.721	0.3888	0.3815	-12.351	-26.7157	0.4387	0.4246	-13.962	-32.4885	0.5428	0.524	-13.2908	-42.0203	0.5851	0.5571	-13.1565	-52.4917	0.6642	0.6363	-19.6005	-52.8945	0.9069	0.8636	-39.6037	-80.1472	1.0493	1.0111	-35.442	-61.755	1.1907	1.1818	-19.332	-74.3745	1.4064	1.385	-34.5022	-66.7223	1.6358	1.6058	-39.0668	-73.9718
		52.0667		0.3609	0.3538	-10.3372	-18.5265	0.3901	0.3819	-10.6058	-26.1787	0.4381	0.4243	-14.7675	-32.8912	0.5463	0.5271	-8.592	-37.8585	0.5834	0.5562	-15.4388	-53.7	0.6629	0.6369	-21.3457	-52.089	0.9107	0.8675	-34.5023	-74.9115	1.0542	1.0132	-28.8637	-58.9357	1.1939	1.1797	-15.036	-77.1937	1.411	1.3842	-28.3267	-67.7963	1.6372	1.6061	-37.1872	-73.569
		52.1333		0.3625	0.3524	-8.18925	-20.406	0.3906	0.3823	-9.9345	-25.6418	0.4385	0.4223	-14.2305	-35.5762	0.5468	0.5238	-7.92075	-42.2887	0.5864	0.5577	-11.4112	-51.6862	0.6653	0.6337	-18.1238	-56.385	0.9054	0.8669	-41.6175	-75.717	1.0528	1.0112	-30.7432	-61.6207	1.1927	1.1801	-16.647	-76.6568	1.407	1.3763	-33.6967	-78.402	1.63	1.6053	-46.8533	-74.643
		52.2		0.3619	0.3527	-8.99475	-20.0032	0.3916	0.383	-8.592	-24.702	0.4367	0.4237	-16.647	-33.6967	0.5447	0.5195	-10.74	-48.0615	0.5829	0.5592	-16.11	-49.6725	0.6613	0.6381	-23.4937	-50.478	0.91	0.8687	-35.442	-73.3005	1.052	1.0052	-31.8173	-69.6757	1.191	1.1785	-18.9293	-78.8048	1.4079	1.3912	-32.4885	-58.3988	1.6404	1.6082	-32.8913	-70.7498
		52.2667		0.3606	0.3529	-10.74	-19.7348	0.3911	0.3827	-9.26325	-25.1047	0.4387	0.4218	-13.962	-36.2475	0.5484	0.5217	-5.77275	-45.108	0.583	0.5586	-15.9757	-50.478	0.662	0.6354	-22.554	-54.1027	0.9092	0.8656	-36.516	-77.4623	1.059	1.0083	-22.4198	-65.514	1.1907	1.1761	-19.332	-82.0268	1.4074	1.3805	-33.1597	-72.7635	1.6324	1.6003	-43.6312	-81.3555
		52.3333		0.3615	0.3521	-9.53175	-20.8087	0.3893	0.38	-11.6798	-28.7295	0.4373	0.4238	-15.8415	-33.5625	0.544	0.5251	-11.6797	-40.5435	0.5846	0.5581	-13.8277	-51.1492	0.6636	0.6342	-20.406	-55.7138	0.9046	0.8645	-42.6915	-78.939	1.0536	1.0124	-29.6692	-60.0097	1.1939	1.1788	-15.036	-78.402	1.4084	1.3826	-31.8172	-69.9443	1.6406	1.6085	-32.6227	-70.347
		52.4		0.3627	0.3498	-7.92075	-23.8965	0.3906	0.3836	-9.9345	-23.8965	0.4372	0.4204	-15.9758	-38.127	0.5458	0.5252	-9.26325	-40.4092	0.585	0.5564	-13.2907	-53.4315	0.6666	0.6392	-16.3785	-49.0012	0.9058	0.8675	-41.0805	-74.9115	1.0523	1.0104	-31.4145	-62.6947	1.197	1.1783	-10.8743	-79.0733	1.4022	1.3864	-40.1408	-64.8428	1.6358	1.6138	-39.0668	-63.2318
		52.4667		0.3611	0.3532	-10.0688	-19.332	0.3906	0.3807	-9.9345	-27.7898	0.4374	0.4256	-15.7073	-31.146	0.5454	0.5243	-9.80025	-41.6175	0.5827	0.5575	-16.3785	-51.9547	0.6639	0.6357	-20.0032	-53.7	0.9098	0.8663	-35.7105	-76.5225	1.061	1.0058	-19.7348	-68.8702	1.1953	1.1796	-13.1565	-77.328	1.4078	1.3838	-32.6227	-68.3333	1.6329	1.606	-42.96	-73.7033
		52.5333		0.3622	0.355	-8.592	-16.9155	0.3894	0.3833	-11.5455	-24.2993	0.4423	0.4233	-9.129	-34.2337	0.5439	0.5246	-11.814	-41.2148	0.5851	0.5583	-13.1565	-50.8807	0.6638	0.6376	-20.1375	-51.1493	0.9076	0.8664	-38.664	-76.3882	1.0529	1.0102	-30.609	-62.9633	1.1932	1.1766	-15.9758	-81.3555	1.404	1.3873	-37.7242	-63.6345	1.6386	1.603	-35.3077	-77.7308
		52.6		0.3627	0.3538	-7.92075	-18.5265	0.3906	0.3822	-9.9345	-25.776	0.4521	0.4228	4.0275	-34.905	0.5458	0.5268	-9.26325	-38.2612	0.584	0.5569	-14.6332	-52.7602	0.6596	0.639	-25.776	-49.2697	0.9114	0.865	-33.5625	-78.2677	1.053	1.0094	-30.4748	-64.0372	1.1916	1.1782	-18.1238	-79.2075	1.4055	1.3828	-35.7105	-69.6758	1.6349	1.6065	-40.275	-73.032
		52.6667		0.3612	0.3523	-9.9345	-20.5402	0.3907	0.3811	-9.80025	-27.2527	0.4469	0.4215	-2.9535	-36.6502	0.5451	0.5245	-10.203	-41.349	0.5836	0.5592	-15.1702	-49.6725	0.6651	0.6365	-18.3922	-52.626	0.9062	0.8682	-40.5435	-73.9718	1.0532	1.007	-30.2063	-67.2593	1.1979	1.1801	-9.666	-76.6568	1.4097	1.3948	-30.072	-53.5658	1.6337	1.5977	-41.886	-84.846
		52.7333		0.3627	0.3498	-7.92075	-23.8965	0.3902	0.3819	-10.4715	-26.1787	0.4413	0.4219	-10.4715	-36.1132	0.5437	0.5249	-12.0825	-40.812	0.5855	0.557	-12.6195	-52.626	0.6618	0.6374	-22.8225	-51.4177	0.9072	0.8694	-39.201	-72.3608	1.0568	1.0062	-25.3733	-68.3332	1.1964	1.1747	-11.6798	-83.9062	1.3993	1.3871	-44.034	-63.903	1.631	1.6089	-45.5108	-69.81
		52.8		0.3616	0.3497	-9.3975	-24.0308	0.3915	0.3823	-8.72625	-25.6418	0.4376	0.4218	-15.4388	-36.2475	0.5448	0.5237	-10.6057	-42.423	0.5839	0.5568	-14.7675	-52.8945	0.6607	0.6369	-24.2993	-52.089	0.9109	0.8672	-34.2337	-75.3143	1.0495	1.0096	-35.1735	-63.7687	1.1884	1.1823	-22.4198	-73.7033	1.406	1.3816	-35.0392	-71.2868	1.6268	1.6022	-51.1493	-78.8048
		52.8667		0.3625	0.3513	-8.18925	-21.8827	0.3933	0.3829	-6.30975	-24.8362	0.4395	0.4221	-12.888	-35.8447	0.5436	0.5272	-12.2167	-37.7242	0.5851	0.5569	-13.1565	-52.7602	0.6611	0.6389	-23.7622	-49.404	0.9071	0.8676	-39.3352	-74.7772	1.053	1.0028	-30.4748	-72.8977	1.1905	1.18	-19.6005	-76.791	1.4074	1.3807	-33.1597	-72.495	1.6373	1.607	-37.053	-72.3608
		52.9333		0.3619	0.3508	-8.99475	-22.554	0.3911	0.3817	-9.26325	-26.4473	0.44	0.4234	-12.2168	-34.0995	0.5458	0.5226	-9.26325	-43.8998	0.5823	0.559	-16.9155	-49.941	0.6615	0.6326	-23.2252	-57.8617	0.9071	0.8668	-39.3352	-75.8512	1.0558	1.0056	-26.7157	-69.1387	1.1943	1.1804	-14.499	-76.254	1.404	1.3837	-37.7242	-68.4675	1.6325	1.604	-43.497	-76.3883
		53		0.3627	0.3516	-7.92075	-21.48	0.3927	0.3817	-7.11525	-26.4473	0.4378	0.4239	-15.1703	-33.4282	0.5425	0.5295	-13.6935	-34.6365	0.5871	0.5588	-10.4715	-50.2095	0.6636	0.6341	-20.406	-55.848	0.9101	0.8653	-35.3077	-77.865	1.0563	1.005	-26.0445	-69.9443	1.1974	1.1776	-10.3373	-80.013	1.4077	1.3769	-32.757	-77.5965	1.6287	1.609	-48.5985	-69.6758
		53.0667		0.3641	0.3504	-6.04125	-23.091	0.3918	0.3802	-8.3235	-28.461	0.4392	0.4249	-13.2908	-32.0857	0.5453	0.5238	-9.9345	-42.2887	0.5848	0.5575	-13.5593	-51.9547	0.6619	0.6351	-22.6882	-54.5055	0.9136	0.873	-30.609	-67.5277	1.0521	1.0042	-31.683	-71.0182	1.1964	1.1826	-11.6798	-73.3005	1.4006	1.3799	-42.2887	-73.569	1.6344	1.6078	-40.9462	-71.2868
		53.1333		0.361	0.3474	-10.203	-27.1185	0.392	0.3835	-8.055	-24.0308	0.4403	0.4251	-11.814	-31.8172	0.5444	0.528	-11.1427	-36.6503	0.5824	0.5586	-16.7812	-50.478	0.6618	0.6322	-22.8225	-58.3987	0.9094	0.8642	-36.2475	-79.3418	1.0538	1.0042	-29.4007	-71.0182	1.1905	1.1774	-19.6005	-80.2815	1.4048	1.3843	-36.6502	-67.662	1.6292	1.6079	-47.9273	-71.1525
		53.2		0.3602	0.3501	-11.277	-23.4937	0.3909	0.3815	-9.53175	-26.7157	0.437	0.4223	-16.2443	-35.5762	0.5422	0.5242	-14.0962	-41.7518	0.5871	0.5582	-10.4715	-51.015	0.6615	0.6353	-23.2252	-54.237	0.9138	0.867	-30.3405	-75.5828	1.054	1.0059	-29.1322	-68.736	1.1943	1.1774	-14.499	-80.2815	1.407	1.387	-33.6967	-64.0373	1.6404	1.6074	-32.8913	-71.8238
		53.2667		0.3626	0.3518	-8.055	-21.2115	0.3922	0.3832	-7.7865	-24.4335	0.4379	0.4244	-15.036	-32.757	0.5447	0.5282	-10.74	-36.3818	0.5831	0.5568	-15.8415	-52.8945	0.6609	0.6319	-24.0307	-58.8015	0.9083	0.8717	-37.7242	-69.273	1.0512	1.0093	-32.8913	-64.1715	1.1963	1.1776	-11.814	-80.013	1.4119	1.3835	-27.1185	-68.736	1.6394	1.6011	-34.2338	-80.2815
		53.3333		0.3618	0.3516	-9.129	-21.48	0.3907	0.3821	-9.80025	-25.9103	0.4386	0.4239	-14.0963	-33.4282	0.5474	0.5257	-7.11525	-39.738	0.5861	0.5593	-11.814	-49.5382	0.6619	0.6327	-22.6882	-57.7275	0.9071	0.8663	-39.3352	-76.5225	1.0529	1.0089	-30.609	-64.7085	1.2038	1.1814	-1.74525	-74.9115	1.4069	1.381	-33.831	-72.0923	1.6469	1.6013	-24.165	-80.013
		53.4		0.3615	0.3516	-9.53175	-21.48	0.392	0.3822	-8.055	-25.776	0.44	0.4235	-12.2168	-33.9652	0.5445	0.5257	-11.0085	-39.738	0.586	0.5577	-11.9482	-51.6862	0.6611	0.6311	-23.7622	-59.8755	0.9111	0.8669	-33.9652	-75.717	1.054	1.005	-29.1322	-69.9443	1.1912	1.1816	-18.6608	-74.643	1.4118	1.3844	-27.2527	-67.5277	1.6351	1.6062	-40.0065	-73.4348
		53.4667		0.3606	0.3517	-10.74	-21.3458	0.3908	0.382	-9.666	-26.0445	0.4417	0.4221	-9.9345	-35.8447	0.5462	0.5227	-8.72625	-43.7655	0.5862	0.5553	-11.6797	-54.9082	0.6625	0.6331	-21.8827	-57.1905	0.9053	0.8672	-41.7517	-75.3143	1.054	1.0104	-29.1322	-62.6947	1.1959	1.1794	-12.351	-77.5965	1.4056	1.3799	-35.5763	-73.569	1.6295	1.608	-47.5245	-71.0183
		53.5333		0.363	0.3524	-7.518	-20.406	0.3901	0.3814	-10.6058	-26.85	0.4369	0.4217	-16.3785	-36.3817	0.545	0.5277	-10.3372	-37.053	0.5841	0.5592	-14.499	-49.6725	0.661	0.636	-23.8965	-53.2972	0.9099	0.8677	-35.5762	-74.643	1.0584	1.0049	-23.2252	-70.0785	1.1994	1.1791	-7.65225	-77.9992	1.4074	1.386	-33.1597	-65.3798	1.6354	1.6004	-39.6038	-81.2213
		53.6		0.3599	0.3501	-11.6797	-23.4937	0.3898	0.3828	-11.0085	-24.9705	0.4386	0.4227	-14.0963	-35.0392	0.5421	0.5265	-14.2305	-38.664	0.5857	0.5607	-12.351	-47.6587	0.6634	0.6374	-20.6745	-51.4177	0.9088	0.8651	-37.053	-78.1335	1.0544	1.0086	-28.5952	-65.1112	1.189	1.1752	-21.6143	-83.235	1.4063	1.3808	-34.6365	-72.3608	1.6398	1.6088	-33.6968	-69.9443
		53.6667		0.363	0.352	-7.518	-20.943	0.3894	0.3812	-11.5455	-27.1185	0.4391	0.4244	-13.425	-32.757	0.5447	0.5245	-10.74	-41.349	0.5846	0.5572	-13.8277	-52.3575	0.6607	0.6355	-24.2993	-53.9685	0.9096	0.8706	-35.979	-70.7497	1.052	1.005	-31.8173	-69.9443	1.1975	1.1774	-10.203	-80.2815	1.4132	1.3857	-25.3732	-65.7825	1.6297	1.605	-47.256	-75.0458
		53.7333		0.3629	0.3511	-7.65225	-22.1512	0.3924	0.3844	-7.518	-22.8225	0.4419	0.4228	-9.666	-34.905	0.5436	0.5253	-12.2167	-40.275	0.5871	0.5604	-10.4715	-48.0615	0.6591	0.629	-26.4472	-62.6947	0.9072	0.8669	-39.201	-75.717	1.0545	1.0121	-28.461	-60.4125	1.1929	1.1787	-16.3785	-78.5362	1.4027	1.3848	-39.4695	-66.9908	1.6266	1.6078	-51.4178	-71.2868
		53.8		0.3619	0.3508	-8.99475	-22.554	0.3887	0.3839	-12.4853	-23.4937	0.4394	0.4218	-13.0222	-36.2475	0.5428	0.5232	-13.2908	-43.0942	0.5822	0.5595	-17.0497	-49.2697	0.6602	0.6326	-24.9705	-57.8617	0.9091	0.8667	-36.6502	-75.9855	1.052	1.0031	-31.8173	-72.495	1.194	1.1756	-14.9018	-82.698	1.406	1.3836	-35.0392	-68.6018	1.6298	1.6126	-47.1218	-64.8428
		53.8667		0.3616	0.3503	-9.3975	-23.2252	0.3886	0.3851	-12.6195	-21.8827	0.4389	0.4234	-13.6935	-34.0995	0.5452	0.5282	-10.0687	-36.3818	0.5852	0.5595	-13.0222	-49.2697	0.6612	0.6303	-23.628	-60.9495	0.9112	0.8687	-33.831	-73.3005	1.0513	1.0098	-32.757	-63.5002	1.1896	1.1755	-20.8088	-82.8322	1.4051	1.3805	-36.2475	-72.7635	1.6291	1.6081	-48.0615	-70.884
		53.9333		0.362	0.3501	-8.8605	-23.4937	0.388	0.3824	-13.425	-25.5075	0.4382	0.4232	-14.6333	-34.368	0.5438	0.5252	-11.9483	-40.4092	0.5833	0.5625	-15.573	-45.2422	0.6616	0.6283	-23.091	-63.6345	0.9081	0.8652	-37.9927	-77.9993	1.0552	1.0031	-27.5213	-72.495	1.1907	1.1791	-19.332	-77.9992	1.4077	1.3863	-32.757	-64.977	1.6274	1.5967	-50.3438	-86.1885
		54		0.3623	0.3495	-8.45775	-24.2992	0.3896	0.3814	-11.277	-26.85	0.4374	0.4222	-15.7073	-35.7105	0.543	0.5241	-13.0222	-41.886	0.5849	0.559	-13.425	-49.941	0.6595	0.6324	-25.9103	-58.1302	0.9102	0.8696	-35.1735	-72.0922	1.0558	1.0061	-26.7157	-68.4675	1.1992	1.1766	-7.92075	-81.3555	1.4067	1.3852	-34.0995	-66.4538	1.6277	1.5986	-49.941	-83.6378
		54.0667		0.3615	0.3511	-9.53175	-22.1512	0.3891	0.3806	-11.9483	-27.924	0.4367	0.4194	-16.647	-39.4695	0.5452	0.5287	-10.0687	-35.7105	0.5838	0.5565	-14.9017	-53.2972	0.6595	0.632	-25.9103	-58.6672	0.907	0.8656	-39.4695	-77.4623	1.0526	1.0058	-31.0118	-68.8702	1.1936	1.1806	-15.4388	-75.9855	1.4026	1.3823	-39.6037	-70.347	1.6324	1.6027	-43.6312	-78.1335
		54.1333		0.3616	0.3528	-9.3975	-19.869	0.3899	0.3807	-10.8742	-27.7898	0.4388	0.4248	-13.8278	-32.22	0.5428	0.526	-13.2908	-39.3353	0.5854	0.556	-12.7537	-53.9685	0.6626	0.6299	-21.7485	-61.4865	0.9108	0.8666	-34.368	-76.1198	1.0532	1.0098	-30.2063	-63.5002	1.1916	1.1755	-18.1238	-82.8322	1.4023	1.3823	-40.0065	-70.347	1.6366	1.5961	-37.9927	-86.994
		54.2		0.3633	0.351	-7.11525	-22.2855	0.3887	0.3804	-12.4853	-28.1925	0.438	0.4219	-14.9018	-36.1132	0.5435	0.5264	-12.351	-38.7983	0.5858	0.5585	-12.2168	-50.6122	0.6612	0.6326	-23.628	-57.8617	0.9078	0.8672	-38.3955	-75.3143	1.0571	1.0063	-24.9705	-68.199	1.1956	1.1801	-12.7538	-76.6568	1.4075	1.3887	-33.0255	-61.755	1.6328	1.6056	-43.0943	-74.2403
		54.2667		0.3619	0.3526	-8.99475	-20.1375	0.3882	0.3814	-13.1565	-26.85	0.4394	0.4217	-13.0222	-36.3817	0.5441	0.525	-11.5455	-40.6778	0.5833	0.557	-15.573	-52.626	0.6634	0.6309	-20.6745	-60.144	0.9105	0.869	-34.7707	-72.8978	1.0533	1.0108	-30.072	-62.1577	1.1953	1.1806	-13.1565	-75.9855	1.4078	1.3841	-32.6227	-67.9305	1.6431	1.6056	-29.2665	-74.2403
		54.3333		0.3623	0.3506	-8.45775	-22.8225	0.3906	0.3815	-9.9345	-26.7157	0.439	0.4212	-13.5593	-37.053	0.5425	0.5284	-13.6935	-36.1133	0.5848	0.5577	-13.5593	-51.6862	0.6632	0.633	-20.943	-57.3247	0.9066	0.864	-40.0065	-79.6102	1.0539	1.0034	-29.2665	-72.0922	1.1935	1.1834	-15.573	-72.2265	1.4106	1.3807	-28.8637	-72.495	1.6351	1.6032	-40.0065	-77.4623
		54.4		0.3614	0.3513	-9.666	-21.8827	0.3893	0.3823	-11.6798	-25.6418	0.4379	0.4232	-15.036	-34.368	0.5436	0.5297	-12.2167	-34.368	0.5852	0.5558	-13.0222	-54.237	0.661	0.6327	-23.8965	-57.7275	0.9141	0.864	-29.9377	-79.6102	1.0516	1.0061	-32.3542	-68.4675	1.1951	1.1782	-13.425	-79.2075	1.4025	1.3805	-39.738	-72.7635	1.6342	1.6056	-41.2148	-74.2403
		54.4667		0.3596	0.351	-12.0825	-22.2855	0.3917	0.3831	-8.45775	-24.5677	0.4397	0.4217	-12.6195	-36.3817	0.5446	0.5264	-10.8742	-38.7983	0.5865	0.5577	-11.277	-51.6862	0.6619	0.6323	-22.6882	-58.2645	0.9134	0.869	-30.8775	-72.8978	1.0556	1.0057	-26.9842	-69.0045	1.1922	1.181	-17.3183	-75.4485	1.4079	1.3814	-32.4885	-71.5553	1.6356	1.6041	-39.3353	-76.254
		54.5333		0.3626	0.3501	-8.055	-23.4937	0.3909	0.3799	-9.53175	-28.8637	0.4375	0.4198	-15.573	-38.9325	0.5421	0.5266	-14.2305	-38.5298	0.5846	0.5559	-13.8277	-54.1027	0.6611	0.6326	-23.7622	-57.8617	0.9121	0.8643	-32.6227	-79.2075	1.0582	1.0103	-23.4937	-62.829	1.2007	1.1742	-5.907	-84.5775	1.4021	1.3796	-40.275	-73.9718	1.6336	1.6032	-42.0203	-77.4623
		54.6		0.3605	0.3511	-10.8742	-22.1512	0.3896	0.3801	-11.277	-28.5953	0.436	0.4214	-17.5868	-36.7845	0.5415	0.5267	-15.036	-38.3955	0.5829	0.5572	-16.11	-52.3575	0.6639	0.6331	-20.0032	-57.1905	0.9091	0.8681	-36.6502	-74.106	1.0563	1.0067	-26.0445	-67.662	1.1927	1.1754	-16.647	-82.9665	1.4085	1.3748	-31.683	-80.4158	1.6256	1.5987	-52.7603	-83.5035
		54.6667		0.3611	0.3502	-10.0688	-23.3595	0.3909	0.3811	-9.53175	-27.2527	0.4375	0.4212	-15.573	-37.053	0.5476	0.5275	-6.84675	-37.3215	0.5861	0.5557	-11.814	-54.3713	0.6617	0.6312	-22.9568	-59.7412	0.9097	0.8659	-35.8447	-77.0595	1.0546	1.0089	-28.3268	-64.7085	1.1939	1.1789	-15.036	-78.2677	1.4044	1.3772	-37.1872	-77.1938	1.6387	1.6036	-35.1735	-76.9253
		54.7333		0.3606	0.3511	-10.74	-22.1512	0.3899	0.3847	-10.8742	-22.4198	0.4373	0.4204	-15.8415	-38.127	0.5441	0.5291	-11.5455	-35.1735	0.5848	0.5564	-13.5593	-53.4315	0.6651	0.6288	-18.3922	-62.9632	0.9075	0.8687	-38.7982	-73.3005	1.0503	1.0073	-34.0995	-66.8565	1.1953	1.1853	-13.1565	-69.6758	1.4016	1.3839	-40.9462	-68.199	1.6278	1.599	-49.8068	-83.1008
		54.8		0.3624	0.35	-8.3235	-23.628	0.3914	0.3817	-8.8605	-26.4473	0.4365	0.4236	-16.9155	-33.831	0.5464	0.5267	-8.45775	-38.3955	0.5828	0.5556	-16.2442	-54.5055	0.661	0.6312	-23.8965	-59.7412	0.9065	0.8656	-40.1408	-77.4623	1.0577	1.0069	-24.165	-67.3935	1.1962	1.1784	-11.9483	-78.939	1.4022	1.3776	-40.1408	-76.6568	1.6249	1.6013	-53.7	-80.013
		54.8667		0.3598	0.3527	-11.814	-20.0032	0.3908	0.3813	-9.666	-26.9843	0.4405	0.4199	-11.5455	-38.7982	0.5443	0.5265	-11.277	-38.664	0.5851	0.5542	-13.1565	-56.385	0.6629	0.6313	-21.3457	-59.607	0.9109	0.8661	-34.2337	-76.791	1.054	1.0073	-29.1322	-66.8565	1.196	1.1769	-12.2168	-80.9527	1.4057	1.3813	-35.442	-71.6895	1.6357	1.6061	-39.201	-73.569
		54.9333		0.3609	0.3519	-10.3372	-21.0772	0.3909	0.3797	-9.53175	-29.1322	0.441	0.4226	-10.8743	-35.1735	0.5466	0.5271	-8.18925	-37.8585	0.5842	0.5565	-14.3647	-53.2972	0.6623	0.6342	-22.1513	-55.7138	0.9092	0.8707	-36.516	-70.6155	1.0523	1.0015	-31.4145	-74.643	1.1925	1.1743	-16.9155	-84.4433	1.4096	1.3795	-30.2062	-74.106	1.6329	1.6097	-42.96	-68.736
		55		0.3632	0.3547	-7.2495	-17.3182	0.3897	0.3809	-11.1428	-27.5212	0.443	0.4222	-8.18925	-35.7105	0.5436	0.5293	-12.2167	-34.905	0.5836	0.5599	-15.1702	-48.7327	0.6616	0.6336	-23.091	-56.5192	0.9111	0.8659	-33.9652	-77.0595	1.0554	1.0073	-27.2528	-66.8565	1.196	1.1779	-12.2168	-79.6103	1.406	1.3786	-35.0392	-75.3142	1.6333	1.6032	-42.423	-77.4623
		55.0667		0.3605	0.3511	-10.8742	-22.1512	0.391	0.3798	-9.3975	-28.998	0.4397	0.4193	-12.6195	-39.6037	0.5426	0.5271	-13.5592	-37.8585	0.5838	0.5578	-14.9017	-51.552	0.661	0.6322	-23.8965	-58.3987	0.9046	0.8674	-42.6915	-75.0457	1.064	1.0065	-15.7072	-67.9305	1.1928	1.18	-16.5127	-76.791	1.4043	1.3825	-37.3215	-70.0785	1.63	1.6028	-46.8533	-77.9993
		55.1333		0.3619	0.352	-8.99475	-20.943	0.3917	0.3822	-8.45775	-25.776	0.439	0.4212	-13.5593	-37.053	0.5432	0.5283	-12.7537	-36.2475	0.5859	0.5566	-12.0825	-53.163	0.6662	0.6357	-16.9155	-53.7	0.9088	0.8635	-37.053	-80.2815	1.056	1.0079	-26.4472	-66.051	1.1964	1.174	-11.6798	-84.846	1.4015	1.3741	-41.0805	-81.3555	1.6271	1.6056	-50.7465	-74.2403
		55.2		0.3608	0.3501	-10.4715	-23.4937	0.39	0.3819	-10.74	-26.1787	0.4362	0.4212	-17.3183	-37.053	0.5423	0.5302	-13.962	-33.6967	0.5852	0.5601	-13.0222	-48.4642	0.6587	0.6329	-26.9843	-57.459	0.9108	0.8683	-34.368	-73.8375	1.0531	1.0063	-30.3405	-68.199	1.1923	1.1807	-17.184	-75.8512	1.4039	1.3739	-37.8585	-81.624	1.6396	1.6086	-33.9653	-70.2128
		55.2667		0.3607	0.3515	-10.6057	-21.6142	0.3912	0.3816	-9.129	-26.5815	0.4384	0.4221	-14.3648	-35.8447	0.5424	0.5264	-13.8277	-38.7983	0.5857	0.5584	-12.351	-50.7465	0.6658	0.6307	-17.4525	-60.4125	0.9074	0.8645	-38.9325	-78.939	1.0568	1.0018	-25.3733	-74.2402	1.1947	1.1802	-13.962	-76.5225	1.4064	1.3821	-34.5022	-70.6155	1.6359	1.5959	-38.9325	-87.2625
		55.3333		0.3633	0.3524	-7.11525	-20.406	0.3915	0.3821	-8.72625	-25.9103	0.4385	0.421	-14.2305	-37.3215	0.5445	0.5275	-11.0085	-37.3215	0.5854	0.5547	-12.7537	-55.7138	0.6628	0.6347	-21.48	-55.0425	0.9092	0.8648	-36.516	-78.5362	1.0534	1.0061	-29.9378	-68.4675	1.1929	1.1833	-16.3785	-72.3608	1.4122	1.3785	-26.7158	-75.4485	1.629	1.5968	-48.1958	-86.0543
		55.4		0.3624	0.351	-8.3235	-22.2855	0.39	0.382	-10.74	-26.0445	0.4397	0.4235	-12.6195	-33.9652	0.5428	0.5286	-13.2908	-35.8448	0.5873	0.5582	-10.203	-51.015	0.6615	0.6345	-23.2252	-55.311	0.9048	0.8664	-42.423	-76.3882	1.0579	1.0049	-23.8965	-70.0785	1.1908	1.1717	-19.1977	-87.9337	1.4104	1.3813	-29.1322	-71.6895	1.636	1.6024	-38.7983	-78.5363
		55.4667		0.3618	0.3508	-9.129	-22.554	0.3889	0.3815	-12.2168	-26.7157	0.4405	0.4253	-11.5455	-31.5487	0.5426	0.5267	-13.5592	-38.3955	0.5841	0.5559	-14.499	-54.1027	0.6622	0.6323	-22.2855	-58.2645	0.9053	0.8612	-41.7517	-83.3693	1.0536	1.0052	-29.6692	-69.6757	1.1928	1.1749	-16.5127	-83.6377	1.4058	1.3815	-35.3077	-71.421	1.6273	1.5998	-50.478	-82.0267
		55.5333		0.3609	0.3509	-10.3372	-22.4198	0.3906	0.3801	-9.9345	-28.5953	0.4394	0.4215	-13.0222	-36.6502	0.5457	0.5286	-9.3975	-35.8448	0.5867	0.5549	-11.0085	-55.4452	0.6626	0.635	-21.7485	-54.6397	0.9082	0.8609	-37.8585	-83.772	1.0528	1.0046	-30.7432	-70.4813	1.1927	1.1742	-16.647	-84.5775	1.4028	1.3782	-39.3352	-75.8513	1.636	1.6021	-38.7983	-78.939
		55.6		0.362	0.3541	-8.8605	-18.1237	0.3921	0.3807	-7.92075	-27.7898	0.4395	0.425	-12.888	-31.9515	0.5425	0.5283	-13.6935	-36.2475	0.5834	0.556	-15.4388	-53.9685	0.6625	0.633	-21.8827	-57.3247	0.9113	0.8635	-33.6968	-80.2815	1.0573	1.0038	-24.702	-71.5552	1.1924	1.1757	-17.0498	-82.5638	1.4024	1.3783	-39.8722	-75.717	1.6321	1.6062	-44.034	-73.4348
		55.6667		0.362	0.3498	-8.8605	-23.8965	0.3908	0.3817	-9.666	-26.4473	0.4382	0.4219	-14.6333	-36.1132	0.543	0.5262	-13.0222	-39.0667	0.5837	0.5569	-15.036	-52.7602	0.6633	0.634	-20.8088	-55.9822	0.9044	0.864	-42.96	-79.6102	1.0549	1.0048	-27.924	-70.2127	1.1917	1.1798	-17.9895	-77.0595	1.4061	1.3723	-34.905	-83.772	1.6312	1.6005	-45.2423	-81.087
		55.7333		0.3605	0.35	-10.8742	-23.628	0.3935	0.3831	-6.04125	-24.5677	0.4366	0.4214	-16.7813	-36.7845	0.5436	0.5285	-12.2167	-35.979	0.5814	0.5563	-18.1237	-53.5657	0.6623	0.6344	-22.1513	-55.4452	0.9085	0.8635	-37.4557	-80.2815	1.0525	1.0048	-31.146	-70.2127	1.1932	1.1725	-15.9758	-86.8598	1.4027	1.3777	-39.4695	-76.5225	1.6295	1.6058	-47.5245	-73.9718
		55.8		0.3607	0.3482	-10.6057	-26.0445	0.391	0.3813	-9.3975	-26.9843	0.4373	0.4236	-15.8415	-33.831	0.5442	0.5286	-11.4112	-35.8448	0.5819	0.5577	-17.4525	-51.6862	0.6631	0.6381	-21.0772	-50.478	0.9122	0.8625	-32.4885	-81.624	1.0566	1.0061	-25.6418	-68.4675	1.1941	1.1765	-14.7675	-81.4897	1.4077	1.3824	-32.757	-70.2128	1.6319	1.5986	-44.3025	-83.6378
		55.8667		0.3616	0.3527	-9.3975	-20.0032	0.3936	0.3807	-5.907	-27.7898	0.4429	0.4198	-8.3235	-38.9325	0.543	0.5311	-13.0222	-32.4885	0.5846	0.5554	-13.8277	-54.774	0.6631	0.6364	-21.0772	-52.7602	0.9123	0.8659	-32.3543	-77.0595	1.0628	1.0074	-17.3183	-66.7222	1.1931	1.1796	-16.11	-77.328	1.4067	1.3816	-34.0995	-71.2868	1.6302	1.6017	-46.5847	-79.476
		55.9333		0.3602	0.3511	-11.277	-22.1512	0.3903	0.379	-10.3373	-30.072	0.437	0.4193	-16.2443	-39.6037	0.5427	0.5308	-13.425	-32.8912	0.5814	0.5572	-18.1237	-52.3575	0.6655	0.6341	-17.8552	-55.848	0.9108	0.8632	-34.368	-80.6843	1.0596	1.0073	-21.6142	-66.8565	1.1921	1.176	-17.4525	-82.161	1.4057	1.3806	-35.442	-72.6292	1.6325	1.6049	-43.497	-75.18
		56		0.3612	0.351	-9.9345	-22.2855	0.3902	0.3823	-10.4715	-25.6418	0.4394	0.4227	-13.0222	-35.0392	0.545	0.5307	-10.3372	-33.0255	0.5854	0.5581	-12.7537	-51.1492	0.6611	0.6318	-23.7622	-58.9357	0.9067	0.8637	-39.8723	-80.013	1.0577	1.007	-24.165	-67.2593	1.1915	1.1776	-18.258	-80.013	1.4046	1.3797	-36.9187	-73.8375	1.6404	1.6014	-32.8913	-79.8788
		56.0667		0.3609	0.3505	-10.3372	-22.9567	0.3902	0.3806	-10.4715	-27.924	0.4371	0.4221	-16.11	-35.8447	0.5433	0.5268	-12.6195	-38.2612	0.5849	0.5554	-13.425	-54.774	0.6602	0.6303	-24.9705	-60.9495	0.9053	0.8608	-41.7517	-83.9062	1.0519	1.0072	-31.9515	-66.9907	1.1895	1.1759	-20.943	-82.2953	1.4088	1.3752	-31.2802	-79.8788	1.6296	1.5961	-47.3903	-86.994
		56.1333		0.3596	0.3514	-12.0825	-21.7485	0.3879	0.381	-13.5593	-27.387	0.4397	0.4237	-12.6195	-33.6967	0.5462	0.5292	-8.72625	-35.0393	0.5878	0.5562	-9.53175	-53.7	0.664	0.6314	-19.869	-59.4727	0.9087	0.8616	-37.1872	-82.8322	1.0533	1.0021	-30.072	-73.8375	1.1917	1.179	-17.9895	-78.1335	1.4041	1.3749	-37.59	-80.2815	1.6381	1.599	-35.979	-83.1008
		56.2		0.3627	0.3496	-7.92075	-24.165	0.3888	0.3798	-12.351	-28.998	0.4422	0.4207	-9.26325	-37.7242	0.5469	0.5293	-7.7865	-34.905	0.5857	0.556	-12.351	-53.9685	0.6622	0.6322	-22.2855	-58.3987	0.9052	0.8629	-41.886	-81.087	1.054	1.0082	-29.1322	-65.6482	1.2001	1.1781	-6.7125	-79.3418	1.4085	1.3752	-31.683	-79.8788	1.634	1.5948	-41.4833	-88.7393
		56.2667		0.3603	0.3494	-11.1427	-24.4335	0.39	0.3816	-10.74	-26.5815	0.4604	0.4216	15.1702	-36.516	0.5487	0.5316	-5.37	-31.8173	0.5814	0.5564	-18.1237	-53.4315	0.6585	0.6326	-27.2527	-57.8617	0.9048	0.861	-42.423	-83.6378	1.0522	1.0062	-31.5487	-68.3332	1.1935	1.1792	-15.573	-77.865	1.4044	1.3775	-37.1872	-76.791	1.6297	1.6018	-47.256	-79.3418
		56.3333		0.3612	0.3515	-9.9345	-21.6142	0.3894	0.3798	-11.5455	-28.998	0.4531	0.4211	5.37	-37.1872	0.5485	0.5297	-5.6385	-34.368	0.5823	0.5595	-16.9155	-49.2697	0.6607	0.6345	-24.2993	-55.311	0.9084	0.8609	-37.59	-83.772	1.0534	1.0036	-29.9378	-71.8237	1.1943	1.1741	-14.499	-84.7118	1.4056	1.379	-35.5763	-74.7773	1.6338	1.6034	-41.7518	-77.1938
		56.4		0.3616	0.3508	-9.3975	-22.554	0.3882	0.382	-13.1565	-26.0445	0.443	0.42	-8.18925	-38.664	0.5467	0.5286	-8.055	-35.8448	0.5815	0.5559	-17.9895	-54.1027	0.6627	0.6315	-21.6143	-59.3385	0.9132	0.8656	-31.146	-77.4623	1.054	1.0061	-29.1322	-68.4675	1.1964	1.1733	-11.6798	-85.7858	1.4108	1.3808	-28.5952	-72.3608	1.6296	1.6001	-47.3903	-81.624
		56.4667		0.3619	0.352	-8.99475	-20.943	0.3898	0.3801	-11.0085	-28.5953	0.4392	0.4273	-13.2908	-28.8637	0.5427	0.5296	-13.425	-34.5023	0.5823	0.5552	-16.9155	-55.0425	0.6626	0.6326	-21.7485	-57.8617	0.9088	0.8593	-37.053	-85.92	1.0534	1.0014	-29.9378	-74.7772	1.1924	1.1784	-17.0498	-78.939	1.4085	1.3753	-31.683	-79.7445	1.6326	1.5955	-43.3627	-87.7995
		56.5333		0.3627	0.3507	-7.92075	-22.6882	0.3916	0.3834	-8.592	-24.165	0.4391	0.4211	-13.425	-37.1872	0.5461	0.5307	-8.8605	-33.0255	0.5858	0.5555	-12.2168	-54.6397	0.6633	0.6341	-20.8088	-55.848	0.9108	0.862	-34.368	-82.2952	1.0587	1.0057	-22.8225	-69.0045	1.1918	1.1749	-17.8553	-83.6377	1.403	1.3782	-39.0667	-75.8513	1.6346	1.5907	-40.6777	-94.2435
		56.6		0.3608	0.3545	-10.4715	-17.5867	0.3884	0.3811	-12.888	-27.2527	0.434	0.4243	-20.2718	-32.8912	0.5451	0.5294	-10.203	-34.7708	0.5849	0.5551	-13.425	-55.1767	0.665	0.631	-18.5265	-60.0097	0.9057	0.8645	-41.2148	-78.939	1.0555	1.0065	-27.1185	-67.9305	1.1907	1.176	-19.332	-82.161	1.4064	1.3792	-34.5022	-74.5088	1.6274	1.6053	-50.3438	-74.643
		56.6667		0.3614	0.3506	-9.666	-22.8225	0.3879	0.3807	-13.5593	-27.7898	0.4354	0.4206	-18.3922	-37.8585	0.5459	0.5307	-9.129	-33.0255	0.5856	0.5561	-12.4852	-53.8342	0.6638	0.6342	-20.1375	-55.7138	0.9096	0.8654	-35.979	-77.7307	1.0539	1.009	-29.2665	-64.5742	1.1942	1.1792	-14.6333	-77.865	1.4064	1.386	-34.5022	-65.3798	1.6365	1.6003	-38.127	-81.3555
		56.7333		0.3615	0.3505	-9.53175	-22.9567	0.3902	0.382	-10.4715	-26.0445	0.4368	0.4196	-16.5128	-39.201	0.545	0.5303	-10.3372	-33.5625	0.584	0.5536	-14.6332	-57.1905	0.6629	0.6365	-21.3457	-52.626	0.9056	0.863	-41.349	-80.9527	1.05	1.0069	-34.5023	-67.3935	1.1902	1.1795	-20.0033	-77.4623	1.4054	1.3786	-35.8447	-75.3142	1.6326	1.6003	-43.3627	-81.3555
		56.8		0.3613	0.3513	-9.80025	-21.8827	0.389	0.3817	-12.0825	-26.4473	0.436	0.4213	-17.5868	-36.9187	0.5445	0.5287	-11.0085	-35.7105	0.5818	0.5541	-17.5868	-56.5192	0.663	0.631	-21.2115	-60.0097	0.908	0.8603	-38.127	-84.5775	1.0573	1.0054	-24.702	-69.4072	1.1897	1.1776	-20.6745	-80.013	1.4061	1.375	-34.905	-80.1473	1.6292	1.6031	-47.9273	-77.5965
		56.8667		0.3621	0.3516	-8.72625	-21.48	0.3887	0.3814	-12.4853	-26.85	0.4373	0.421	-15.8415	-37.3215	0.5423	0.5292	-13.962	-35.0393	0.5841	0.5579	-14.499	-51.4177	0.6615	0.6274	-23.2252	-64.8427	0.9075	0.8619	-38.7982	-82.4295	1.0563	1.0032	-26.0445	-72.3607	1.1955	1.1739	-12.888	-84.9803	1.403	1.3748	-39.0667	-80.4158	1.6257	1.6039	-52.626	-76.5225
		56.9333		0.3615	0.3513	-9.53175	-21.8827	0.3933	0.3818	-6.30975	-26.313	0.4392	0.4203	-13.2908	-38.2612	0.5458	0.5312	-9.26325	-32.3542	0.5817	0.5563	-17.721	-53.5657	0.6637	0.6303	-20.2718	-60.9495	0.9095	0.8632	-36.1132	-80.6843	1.0562	1.004	-26.1787	-71.2867	1.1915	1.1721	-18.258	-87.3968	1.4043	1.3763	-37.3215	-78.402	1.627	1.6005	-50.8808	-81.087
		57		0.3613	0.3494	-9.80025	-24.4335	0.392	0.3815	-8.055	-26.7157	0.4362	0.4224	-17.3183	-35.442	0.5428	0.53	-13.2908	-33.9653	0.5844	0.5572	-14.0962	-52.3575	0.6622	0.6308	-22.2855	-60.2782	0.9037	0.8645	-43.8998	-78.939	1.056	1.002	-26.4472	-73.9717	1.189	1.1759	-21.6143	-82.2953	1.4043	1.3847	-37.3215	-67.125	1.627	1.6033	-50.8808	-77.328
		57.0667		0.3605	0.3509	-10.8742	-22.4198	0.3912	0.3811	-9.129	-27.2527	0.441	0.4191	-10.8743	-39.8722	0.5416	0.5318	-14.9017	-31.5487	0.5852	0.5564	-13.0222	-53.4315	0.6636	0.6309	-20.406	-60.144	0.9099	0.8622	-35.5762	-82.0267	1.0517	1.0077	-32.22	-66.3195	1.1925	1.1764	-16.9155	-81.624	1.4081	1.3848	-32.22	-66.9908	1.6279	1.5976	-49.6725	-84.9803
		57.1333		0.3633	0.3481	-7.11525	-26.1787	0.3906	0.3808	-9.9345	-27.6555	0.437	0.4201	-16.2443	-38.5297	0.543	0.5315	-13.0222	-31.9515	0.5844	0.5582	-14.0962	-51.015	0.6589	0.6307	-26.7157	-60.4125	0.9044	0.8624	-42.96	-81.7582	1.0595	1.0038	-21.7485	-71.5552	1.1947	1.1774	-13.962	-80.2815	1.4018	1.3795	-40.6777	-74.106	1.6265	1.5963	-51.552	-86.7255
		57.2		0.3593	0.3496	-12.4852	-24.165	0.3917	0.3823	-8.45775	-25.6418	0.4376	0.4184	-15.4388	-40.812	0.5444	0.53	-11.1427	-33.9653	0.5856	0.5546	-12.4852	-55.848	0.6616	0.6319	-23.091	-58.8015	0.9136	0.8637	-30.609	-80.013	1.059	1.001	-22.4198	-75.3142	1.1971	1.1742	-10.74	-84.5775	1.4067	1.3742	-34.0995	-81.2213	1.6323	1.6041	-43.7655	-76.254
		57.2667		0.3614	0.3505	-9.666	-22.9567	0.3881	0.3807	-13.2908	-27.7898	0.4387	0.4195	-13.962	-39.3352	0.5424	0.5308	-13.8277	-32.8912	0.5844	0.5582	-14.0962	-51.015	0.6636	0.631	-20.406	-60.0097	0.9133	0.861	-31.0117	-83.6378	1.0579	1.0049	-23.8965	-70.0785	1.1946	1.1731	-14.0963	-86.0542	1.404	1.3756	-37.7242	-79.3418	1.6289	1.5992	-48.33	-82.8323
		57.3333		0.3624	0.3502	-8.3235	-23.3595	0.3903	0.3823	-10.3373	-25.6418	0.4384	0.4207	-14.3648	-37.7242	0.5434	0.5306	-12.4852	-33.1598	0.5832	0.5571	-15.7072	-52.4917	0.6599	0.6297	-25.3732	-61.755	0.9103	0.8602	-35.0393	-84.7118	1.0545	1.0029	-28.461	-72.7635	1.1951	1.1756	-13.425	-82.698	1.4008	1.3841	-42.0202	-67.9305	1.6285	1.5948	-48.867	-88.7393
		57.4		0.3629	0.3486	-7.65225	-25.5075	0.3916	0.3794	-8.592	-29.535	0.4471	0.4219	-2.685	-36.1132	0.5467	0.5297	-8.055	-34.368	0.5857	0.5562	-12.351	-53.7	0.6633	0.6308	-20.8088	-60.2782	0.9039	0.8613	-43.6312	-83.235	1.0596	1.0022	-21.6142	-73.7033	1.1913	1.1818	-18.5265	-74.3745	1.4136	1.3791	-24.8363	-74.643	1.6326	1.6014	-43.3627	-79.8788
		57.4667		0.3617	0.3496	-9.26325	-24.165	0.3911	0.3808	-9.26325	-27.6555	0.4578	0.4203	11.6797	-38.2612	0.544	0.5307	-11.6797	-33.0255	0.5819	0.5537	-17.4525	-57.0562	0.6595	0.6347	-25.9103	-55.0425	0.9078	0.8639	-38.3955	-79.7445	1.0609	1.0029	-19.869	-72.7635	1.1898	1.1709	-20.5403	-89.0077	1.4067	1.3768	-34.0995	-77.7308	1.6256	1.5978	-52.7603	-84.7117
		57.5333		0.3629	0.3505	-7.65225	-22.9567	0.3927	0.3815	-7.11525	-26.7157	0.4446	0.42	-6.04125	-38.664	0.5428	0.5311	-13.2908	-32.4885	0.5814	0.5552	-18.1237	-55.0425	0.6605	0.6338	-24.5677	-56.2507	0.9095	0.8611	-36.1132	-83.5035	1.0586	1.0048	-22.9568	-70.2127	1.1939	1.1699	-15.036	-90.3503	1.4041	1.3785	-37.59	-75.4485	1.6329	1.6029	-42.96	-77.865
		57.6		0.3625	0.3509	-8.18925	-22.4198	0.3902	0.3799	-10.4715	-28.8637	0.438	0.421	-14.9018	-37.3215	0.5411	0.5354	-15.573	-26.7158	0.5827	0.5552	-16.3785	-55.0425	0.6595	0.6333	-25.9103	-56.922	0.9124	0.8635	-32.22	-80.2815	1.0563	1.0046	-26.0445	-70.4813	1.2011	1.1729	-5.37	-86.3227	1.4079	1.3796	-32.4885	-73.9718	1.6321	1.6012	-44.034	-80.1473
		57.6667		0.3604	0.3511	-11.0085	-22.1512	0.3884	0.3801	-12.888	-28.5953	0.4403	0.42	-11.814	-38.664	0.5451	0.5329	-10.203	-30.072	0.584	0.5573	-14.6332	-52.2232	0.6586	0.6307	-27.1185	-60.4125	0.906	0.8605	-40.812	-84.309	1.0551	1.006	-27.6555	-68.6017	1.1968	1.179	-11.1427	-78.1335	1.4033	1.3849	-38.664	-66.8565	1.639	1.5941	-34.7708	-89.679
		57.7333		0.3604	0.3518	-11.0085	-21.2115	0.3907	0.3803	-9.80025	-28.3268	0.435	0.421	-18.9293	-37.3215	0.5461	0.5326	-8.8605	-30.4748	0.5854	0.5562	-12.7537	-53.7	0.6625	0.6274	-21.8827	-64.8427	0.9082	0.8654	-37.8585	-77.7307	1.0527	1.0017	-30.8775	-74.3745	1.1953	1.1745	-13.1565	-84.1747	1.4153	1.3811	-22.554	-71.958	1.6327	1.5971	-43.2285	-85.6515
		57.8		0.3612	0.3503	-9.9345	-23.2252	0.3885	0.3807	-12.7538	-27.7898	0.4364	0.4198	-17.0498	-38.9325	0.5443	0.5328	-11.277	-30.2062	0.5827	0.5517	-16.3785	-59.7412	0.664	0.632	-19.869	-58.6672	0.9099	0.8658	-35.5762	-77.1937	1.0496	1.0079	-35.0392	-66.051	1.1901	1.1734	-20.1375	-85.6515	1.4	1.3821	-43.0942	-70.6155	1.6299	1.5971	-46.9875	-85.6515
		57.8667		0.3607	0.3502	-10.6057	-23.3595	0.3886	0.3821	-12.6195	-25.9103	0.4375	0.4186	-15.573	-40.5435	0.546	0.5301	-8.99475	-33.831	0.585	0.5572	-13.2907	-52.3575	0.6622	0.6276	-22.2855	-64.5742	0.9098	0.8611	-35.7105	-83.5035	1.0556	1.0027	-26.9842	-73.032	1.1946	1.1727	-14.0963	-86.5912	1.402	1.3802	-40.4092	-73.1663	1.6266	1.593	-51.4178	-91.1558
		57.9333		0.3612	0.3499	-9.9345	-23.7622	0.388	0.3808	-13.425	-27.6555	0.4377	0.423	-15.3045	-34.6365	0.5456	0.5327	-9.53175	-30.3405	0.5849	0.5553	-13.425	-54.9082	0.6643	0.628	-19.4663	-64.0372	0.9078	0.8599	-38.3955	-85.1145	1.0551	0.9988	-27.6555	-78.2677	1.1925	1.1741	-16.9155	-84.7118	1.4055	1.3834	-35.7105	-68.8703	1.6318	1.5926	-44.4368	-91.6928
		58		0.3605	0.3501	-10.8742	-23.4937	0.3893	0.3785	-11.6798	-30.7432	0.438	0.4194	-14.9018	-39.4695	0.5456	0.5334	-9.53175	-29.4008	0.5854	0.5523	-12.7537	-58.9357	0.6615	0.629	-23.2252	-62.6947	0.9095	0.8614	-36.1132	-83.1007	1.0508	1.0026	-33.4282	-73.1662	1.1973	1.1718	-10.4715	-87.7995	1.4087	1.3817	-31.4145	-71.1525	1.63	1.5989	-46.8533	-83.235
		58.0667		0.3639	0.3503	-6.30975	-23.2252	0.39	0.3818	-10.74	-26.313	0.4372	0.4209	-15.9758	-37.4557	0.5438	0.533	-11.9483	-29.9378	0.5805	0.5532	-19.332	-57.7275	0.6596	0.6288	-25.776	-62.9632	0.9054	0.8665	-41.6175	-76.254	1.0573	1.0065	-24.702	-67.9305	1.1916	1.1761	-18.1238	-82.0268	1.398	1.3732	-45.7792	-82.5638	1.6247	1.5935	-53.9685	-90.4845
		58.1333		0.3608	0.3525	-10.4715	-20.2717	0.389	0.381	-12.0825	-27.387	0.4372	0.4221	-15.9758	-35.8447	0.5436	0.5344	-12.2167	-28.0583	0.5838	0.5548	-14.9017	-55.5795	0.6604	0.6271	-24.702	-65.2455	0.9104	0.8676	-34.905	-74.7772	1.0524	1.0026	-31.2802	-73.1662	1.1979	1.1768	-9.666	-81.087	1.4065	1.3732	-34.368	-82.5638	1.6295	1.5955	-47.5245	-87.7995
		58.2		0.3605	0.3503	-10.8742	-23.2252	0.3902	0.3789	-10.4715	-30.2062	0.4365	0.4195	-16.9155	-39.3352	0.5478	0.5336	-6.57825	-29.1323	0.5839	0.5555	-14.7675	-54.6397	0.6629	0.6304	-21.3457	-60.8152	0.9065	0.8617	-40.1408	-82.698	1.0573	1.0039	-24.702	-71.421	1.1925	1.1706	-16.9155	-89.4105	1.4058	1.3741	-35.3077	-81.3555	1.6305	1.5934	-46.182	-90.6188
		58.2667		0.3611	0.3481	-10.0688	-26.1787	0.3909	0.3798	-9.53175	-28.998	0.435	0.4206	-18.9293	-37.8585	0.5452	0.5343	-10.0687	-28.1925	0.5858	0.5568	-12.2168	-52.8945	0.6588	0.6253	-26.85	-67.662	0.9106	0.8617	-34.6365	-82.698	1.0565	1.0028	-25.776	-72.8977	1.197	1.1744	-10.8743	-84.309	1.4028	1.3737	-39.3352	-81.8925	1.6333	1.6023	-42.423	-78.6705
		58.3333		0.3606	0.3495	-10.74	-24.2992	0.389	0.3794	-12.0825	-29.535	0.4352	0.4213	-18.6608	-36.9187	0.5451	0.5323	-10.203	-30.8775	0.584	0.5547	-14.6332	-55.7138	0.6592	0.6281	-26.313	-63.903	0.914	0.8619	-30.072	-82.4295	1.0503	1.0019	-34.0995	-74.106	1.1915	1.1692	-18.258	-91.29	1.4054	1.374	-35.8447	-81.4898	1.6336	1.5977	-42.0203	-84.846
		58.4		0.3619	0.3492	-8.99475	-24.702	0.3886	0.379	-12.6195	-30.072	0.4398	0.419	-12.4853	-40.0065	0.5443	0.5327	-11.277	-30.3405	0.5878	0.5544	-9.53175	-56.1165	0.663	0.6295	-21.2115	-62.0235	0.9094	0.8608	-36.2475	-83.9062	1.0581	1.0046	-23.628	-70.4813	1.1897	1.1715	-20.6745	-88.2023	1.4102	1.3777	-29.4008	-76.5225	1.6305	1.6051	-46.182	-74.9115
		58.4667		0.3604	0.3507	-11.0085	-22.6882	0.3921	0.3803	-7.92075	-28.3268	0.4417	0.4211	-9.9345	-37.1872	0.5449	0.5344	-10.4715	-28.0583	0.5834	0.556	-15.4388	-53.9685	0.6608	0.6286	-24.165	-63.2317	0.9114	0.8578	-33.5625	-87.9338	1.0555	1.0023	-27.1185	-73.569	1.1942	1.1736	-14.6333	-85.383	1.4079	1.3723	-32.4885	-83.772	1.6285	1.6054	-48.867	-74.5088
		58.5333		0.3608	0.3516	-10.4715	-21.48	0.3888	0.38	-12.351	-28.7295	0.4437	0.4225	-7.2495	-35.3077	0.5425	0.5335	-13.6935	-29.2665	0.5845	0.5537	-13.962	-57.0562	0.6605	0.6315	-24.5677	-59.3385	0.9117	0.8605	-33.1598	-84.309	1.0537	1.0032	-29.535	-72.3607	1.194	1.1742	-14.9018	-84.5775	1.4009	1.3738	-41.886	-81.7583	1.6274	1.6038	-50.3438	-76.6568
		58.6		0.3596	0.3493	-12.0825	-24.5677	0.3891	0.3792	-11.9483	-29.8035	0.4468	0.4216	-3.08775	-36.516	0.5413	0.5332	-15.3045	-29.6693	0.5861	0.5545	-11.814	-55.9822	0.6606	0.6292	-24.4335	-62.4262	0.905	0.8618	-42.1545	-82.5638	1.0524	1.0022	-31.2802	-73.7033	1.1895	1.1724	-20.943	-86.994	1.4024	1.3838	-39.8722	-68.3333	1.6316	1.5911	-44.7053	-93.7065
		58.6667		0.3622	0.3526	-8.592	-20.1375	0.3894	0.3787	-11.5455	-30.4748	0.4402	0.4195	-11.9483	-39.3352	0.5456	0.533	-9.53175	-29.9378	0.5834	0.5558	-15.4388	-54.237	0.6606	0.6327	-24.4335	-57.7275	0.9067	0.8617	-39.8723	-82.698	1.0519	1.0048	-31.9515	-70.2127	1.1913	1.1691	-18.5265	-91.4242	1.4049	1.3747	-36.516	-80.55	1.6283	1.5959	-49.1355	-87.2625
		58.7333		0.3613	0.3498	-9.80025	-23.8965	0.3897	0.3808	-11.1428	-27.6555	0.4377	0.4205	-15.3045	-37.9927	0.5422	0.5335	-14.0962	-29.2665	0.5856	0.5561	-12.4852	-53.8342	0.6632	0.6289	-20.943	-62.829	0.9074	0.8652	-38.9325	-77.9993	1.0549	1.0019	-27.924	-74.106	1.1896	1.1758	-20.8088	-82.4295	1.4034	1.3797	-38.5297	-73.8375	1.6283	1.6056	-49.1355	-74.2403
		58.8		0.3596	0.3505	-12.0825	-22.9567	0.3896	0.3809	-11.277	-27.5212	0.4356	0.4222	-18.1238	-35.7105	0.5443	0.536	-11.277	-25.9103	0.5846	0.5542	-13.8277	-56.385	0.6613	0.632	-23.4937	-58.6672	0.9083	0.8611	-37.7242	-83.5035	1.0521	1.0001	-31.683	-76.5225	1.1958	1.1759	-12.4853	-82.2953	1.41	1.374	-29.6692	-81.4898	1.6295	1.5969	-47.5245	-85.92
		58.8667		0.3605	0.3493	-10.8742	-24.5677	0.3871	0.3807	-14.6332	-27.7898	0.4355	0.4204	-18.258	-38.127	0.543	0.534	-13.0222	-28.5953	0.5887	0.5518	-8.3235	-59.607	0.6627	0.6291	-21.6143	-62.5605	0.9083	0.8605	-37.7242	-84.309	1.0542	1.0041	-28.8637	-71.1525	1.1933	1.176	-15.8415	-82.161	1.4022	1.3842	-40.1408	-67.7963	1.6293	1.6007	-47.793	-80.8185
		58.9333		0.3613	0.3498	-9.80025	-23.8965	0.3909	0.379	-9.53175	-30.072	0.4369	0.4213	-16.3785	-36.9187	0.5434	0.5362	-12.4852	-25.6418	0.5839	0.5537	-14.7675	-57.0562	0.6633	0.6305	-20.8088	-60.681	0.905	0.8629	-42.1545	-81.087	1.0552	1.0103	-27.5213	-62.829	1.1967	1.1715	-11.277	-88.2023	1.4046	1.3747	-36.9187	-80.55	1.6291	1.6	-48.0615	-81.7583
		59		0.3596	0.3476	-12.0825	-26.85	0.3911	0.3798	-9.26325	-28.998	0.4384	0.4186	-14.3648	-40.5435	0.5454	0.5329	-9.80025	-30.072	0.5824	0.5549	-16.7812	-55.4452	0.6598	0.631	-25.5075	-60.0097	0.9109	0.8629	-34.2337	-81.087	1.0504	1.0013	-33.9652	-74.9115	1.1915	1.1802	-18.258	-76.5225	1.4087	1.3797	-31.4145	-73.8375	1.6319	1.5925	-44.3025	-91.827
		59.0667		0.3624	0.3497	-8.3235	-24.0308	0.3904	0.3812	-10.203	-27.1185	0.4367	0.4202	-16.647	-38.3955	0.5428	0.5368	-13.2908	-24.8362	0.5822	0.5562	-17.0497	-53.7	0.6586	0.6291	-27.1185	-62.5605	0.9035	0.8619	-44.1682	-82.4295	1.0523	1.0037	-31.4145	-71.6895	1.1948	1.1737	-13.8277	-85.2487	1.4066	1.38	-34.2337	-73.4348	1.6324	1.6004	-43.6312	-81.2213
		59.1333		0.3625	0.3482	-8.18925	-26.0445	0.3895	0.3821	-11.4112	-25.9103	0.4362	0.4183	-17.3183	-40.9462	0.5441	0.5373	-11.5455	-24.165	0.5839	0.5563	-14.7675	-53.5657	0.6618	0.6301	-22.8225	-61.218	0.9088	0.8643	-37.053	-79.2075	1.0543	1.0027	-28.7295	-73.032	1.1948	1.1726	-13.8277	-86.7255	1.3991	1.3741	-44.3025	-81.3555	1.6303	1.5961	-46.4505	-86.994
		59.2		0.3619	0.3515	-8.99475	-21.6142	0.3911	0.3814	-9.26325	-26.85	0.4393	0.4195	-13.1565	-39.3352	0.5464	0.5384	-8.45775	-22.6883	0.585	0.5547	-13.2907	-55.7138	0.6602	0.6262	-24.9705	-66.4538	0.9081	0.8623	-37.9927	-81.8925	1.0553	1.0016	-27.387	-74.5087	1.1906	1.1749	-19.4662	-83.6377	1.4035	1.3826	-38.3955	-69.9443	1.6372	1.6038	-37.1872	-76.6568
		59.2667		0.361	0.3482	-10.203	-26.0445	0.3908	0.3797	-9.666	-29.1322	0.4376	0.418	-15.4388	-41.349	0.5451	0.5366	-10.203	-25.1048	0.582	0.5565	-17.3182	-53.2972	0.6593	0.6268	-26.1788	-65.6482	0.9024	0.8631	-45.645	-80.8185	1.06	1.0015	-21.0773	-74.643	1.197	1.1684	-10.8743	-92.364	1.4041	1.3743	-37.59	-81.087	1.6335	1.6004	-42.1545	-81.2213
		59.3333		0.3604	0.3516	-11.0085	-21.48	0.3902	0.3798	-10.4715	-28.998	0.438	0.4206	-14.9018	-37.8585	0.5425	0.5359	-13.6935	-26.0445	0.5836	0.5553	-15.1702	-54.9082	0.6624	0.6269	-22.017	-65.514	0.9086	0.8604	-37.3215	-84.4432	1.0518	1.0012	-32.0857	-75.0457	1.1888	1.1748	-21.8827	-83.772	1.4026	1.3769	-39.6037	-77.5965	1.6291	1.5991	-48.0615	-82.9665
		59.4		0.3604	0.3495	-11.0085	-24.2992	0.3919	0.3796	-8.18925	-29.2665	0.4381	0.4204	-14.7675	-38.127	0.5444	0.5377	-11.1427	-23.628	0.5822	0.5578	-17.0497	-51.552	0.663	0.6269	-21.2115	-65.514	0.9072	0.8583	-39.201	-87.2625	1.0504	1.0022	-33.9652	-73.7033	1.2003	1.1774	-6.444	-80.2815	1.4054	1.3729	-35.8447	-82.9665	1.6338	1.5995	-41.7518	-82.4295
		59.4667		0.3611	0.3508	-10.0688	-22.554	0.3921	0.3786	-7.92075	-30.609	0.4389	0.4187	-13.6935	-40.4092	0.5458	0.5347	-9.26325	-27.6555	0.5797	0.5544	-20.406	-56.1165	0.6591	0.6277	-26.4472	-64.44	0.9069	0.8653	-39.6037	-77.865	1.0537	1.0001	-29.535	-76.5225	1.1961	1.1703	-12.0825	-89.8133	1.4045	1.3741	-37.053	-81.3555	1.6291	1.5985	-48.0615	-83.772
		59.5333		0.3604	0.3511	-11.0085	-22.1512	0.391	0.3781	-9.3975	-31.2803	0.4369	0.418	-16.3785	-41.349	0.5436	0.5355	-12.2167	-26.5815	0.5839	0.5525	-14.7675	-58.6672	0.6609	0.6253	-24.0307	-67.662	0.9108	0.8627	-34.368	-81.3555	1.0559	1.0002	-26.5815	-76.3882	1.188	1.1704	-22.9568	-89.679	1.4027	1.3808	-39.4695	-72.3608	1.6233	1.5937	-55.848	-90.216
		59.6		0.3618	0.3527	-9.129	-20.0032	0.3885	0.3801	-12.7538	-28.5953	0.4378	0.4177	-15.1703	-41.7517	0.5454	0.536	-9.80025	-25.9103	0.5835	0.554	-15.3045	-56.6535	0.6624	0.6307	-22.017	-60.4125	0.9121	0.8637	-32.6227	-80.013	1.0544	1.004	-28.5952	-71.2867	1.1966	1.1707	-11.4112	-89.2762	1.4075	1.3784	-33.0255	-75.5828	1.6239	1.6003	-55.0425	-81.3555
		59.6667		0.362	0.3518	-8.8605	-21.2115	0.3875	0.3815	-14.0963	-26.7157	0.4366	0.4207	-16.7813	-37.7242	0.5402	0.5387	-16.7812	-22.2855	0.5824	0.5528	-16.7812	-58.2645	0.6596	0.6308	-25.776	-60.2782	0.9111	0.8608	-33.9652	-83.9062	1.0546	0.9999	-28.3268	-76.791	1.193	1.1746	-16.2443	-84.0405	1.3988	1.3743	-44.7052	-81.087	1.6276	1.5972	-50.0753	-85.5173
		59.7333		0.364	0.351	-6.1755	-22.2855	0.3909	0.3804	-9.53175	-28.1925	0.44	0.4221	-12.2168	-35.8447	0.5453	0.536	-9.9345	-25.9103	0.5836	0.5538	-15.1702	-56.922	0.6612	0.6299	-23.628	-61.4865	0.9079	0.8591	-38.2612	-86.1885	1.0538	1.0027	-29.4007	-73.032	1.1922	1.1763	-17.3183	-81.7583	1.4046	1.3793	-36.9187	-74.3745	1.6346	1.5975	-40.6777	-85.1145
		59.8		0.361	0.3522	-10.203	-20.6745	0.3903	0.3785	-10.3373	-30.7432	0.4445	0.4194	-6.1755	-39.4695	0.5427	0.5376	-13.425	-23.7622	0.5857	0.5535	-12.351	-57.3247	0.6623	0.6299	-22.1513	-61.4865	0.9101	0.8606	-35.3077	-84.1747	1.0562	1.0005	-26.1787	-75.9855	1.1932	1.1725	-15.9758	-86.8598	1.4093	1.3816	-30.609	-71.2868	1.631	1.5884	-45.5108	-97.3313
		59.8667		0.3623	0.3498	-8.45775	-23.8965	0.3884	0.381	-12.888	-27.387	0.4501	0.42	1.3425	-38.664	0.5426	0.5368	-13.5592	-24.8362	0.585	0.5519	-13.2907	-59.4727	0.6596	0.6333	-25.776	-56.922	0.9032	0.8666	-44.571	-76.1198	1.0522	1.0026	-31.5487	-73.1662	1.1907	1.1721	-19.332	-87.3968	1.4038	1.3777	-37.9927	-76.5225	1.6344	1.5932	-40.9462	-90.8873
		59.9333		0.3647	0.3499	-5.23575	-23.7622	0.3909	0.3801	-9.53175	-28.5953	0.4482	0.4185	-1.20825	-40.6777	0.5418	0.5369	-14.6332	-24.702	0.5858	0.5544	-12.2168	-56.1165	0.6585	0.6316	-27.2527	-59.2042	0.9113	0.8605	-33.6968	-84.309	1.0539	1.0025	-29.2665	-73.3005	1.1966	1.1711	-11.4112	-88.7392	1.4094	1.3762	-30.4747	-78.5363	1.6301	1.6064	-46.719	-73.1663
		60		0.3638	0.3508	-6.444	-22.554	0.3911	0.3799	-9.26325	-28.8637	0.4398	0.4187	-12.4853	-40.4092	0.5441	0.5404	-11.5455	-20.0033	0.5872	0.5571	-10.3372	-52.4917	0.6603	0.6337	-24.8363	-56.385	0.912	0.8634	-32.757	-80.4158	1.0538	0.9968	-29.4007	-80.9527	1.1991	1.1736	-8.055	-85.383	1.4028	1.3813	-39.3352	-71.6895	1.6263	1.6002	-51.8205	-81.4898

## Sheet: Coupling Enzyme Parameters
	DEAMINATION REACTION
	Co-Substrate for Methyl Transfer (Select ONE)					SAM	8-aza-SAM		pH of EXPERIMENT	7.6
						NO	YES
	De Parameters for DEAMINATION RECTIONS					De MAX (ACIDIC)	De MAX (BASIC)	pKa
						(M-1 cm-1)	(M-1 cm-1)	deaminated product
	with SAM (recorded at 263 nm)					-8076	-4655	8.72
	with 8-aza-SAM		recorded at (Select ONE)	282 nm	YES	-14975	-2026	7.29			SENSITIVE FOR MOST pHs (<8.00)
				292 nm	NO	-10117	-3016	7.3			SENSITIVE FOR HIGH pHs (>8.00)
	De for SPECIFIC EXPERIMENTAL CONDITIONS is:					-6283.11	(M-1 cm-1)
								-6283.11
	INSTRUCTIONS:
	The PINK cells MUST NOT be edited; data in these cells correspond to universal parameters established within the article.
	ONLY GREEN and BLUE cells should be filed: user MUST input a 'YES' or 'NO' answer within GREEN cells.
	Likewise, user MUST input the experimental pH value she/he used within BLUE cell.

## Sheet: My 1-Step EZ-MTase RESULTS
	Experiments with Blanks																						MTase Experiments
	LEVEL 1:																						LEVEL 3:
	For each substrate concentration, input the value (mAbs/min)																						For each substrate concentration, input the value (mAbs/min)
	of the matching Initial Slope from the GRAPH onto the left.																						of the matching Initial Slope from the GRAPH onto the left.
		BLANKS			(8-aza-SAM DECOMPOSITION)																			CePRMT5 RATES		(CORRECTED for 8-aza-SAM DECOMPOSITION)
		[8azaSAM]	Init slope (10 mm; mAbs/min)	TIME FRAME	Speed (10 mm; Abs/min)	Decomp. Rate (mM/h)																		[8azaSAM]	Init slope (10 mm; mAbs/min)	TIME FRAME	Speed (10 mm; Abs/min)	Rate with Peptide Acceptor (mM/h)	Corrected Rate (mM/h)
		mM																						mM
		0																						0	0		0	1.497	0
	1	4.16	-0.1945	0-50 min	-0.0001945	1.85736																		4.16	-0.5249	0-20 min	-0.0005249	5.01249	3.35616
	2	6.24	-0.1265	0-60 min	-0.0001265	1.208																		6.24	-0.5603	0-20 min	-0.0005603	5.35054	3.61455
	3	10.816	-0.246	0-50 min	-0.000246	2.34916																		10.816	-0.7462	0-20 min	-0.0007462	7.12578	5.21452
	4	20.8	-0.2194	0-50 min	-0.0002194	2.09514																		20.8	-0.9636	0-20 min	-0.0009636	9.20182	6.90818
	5	24.96	-0.233	0-60 min	-0.000233	2.22501																		24.96	-1.0681	0-20 min	-0.0010681	10.1997	7.74676
	6	31.616	-0.3221	0-60 min	-0.0003221	3.07587																		31.616	-1.3138	0-20 min	-0.0013138	12.546	9.83813
	7	54.912	-0.4405	5-60 min	-0.0004405	4.20652																		54.912	-1.473	0-20 min	-0.001473	14.0663	10.4662
	8	69.056	-0.4314	0-50 min	-0.0004314	4.11962																		69.056	-1.3137	0-20 min	-0.0013137	12.5451	8.40323
	9	83.2	-0.3851	0-60 min	-0.0003851	3.67748																		83.2	-1.4409	5-20 min	-0.0014409	13.7598	9.0762
	10	104	-0.5597	0-60 min	-0.0005597	5.34481																		104	-1.3462	0-20 min	-0.0013462	12.8554	7.37523
	11	124.8	-0.7076	0-60 min	-0.0007076	6.75717																		124.8	-1.4618	0-20 min	-0.0014618	13.9593	7.6825
					LEVEL 2:
					Input Equation Parameters:																						CONGRATS!
																											YOUR KINETIC DATA
					Blank LINEAR
																											with its FIT
					SLOPE	0.0383
					INTERCET	1.497
																											LEVEL 4:	Enter guess values for kcat, Km and Ki in GREEN cells.
																												Enter your MTase enzyme concentration (BLUE cell).
																												Use SOLVER to fit your data (see picture on the RIGHT).
																								FOR FIT ONLY
																								[8-aza-SAM] (mM)	Corrected MTase Rate (mM/h)	Predicted Rate (mM/h)	c 2		kcat (h-1)		15.3867	Best Fit Values
																													Km (mM)		34.9253
																													Ks (mM)		67.2836
																								0	0	0	0		[MTase] (mM)		1.508
																								4.16	3.35616	2.45345	0.814893
																								6.24	3.61455	3.46845	0.0213433		Sc2		4.89211
																								10.816	5.21452	5.28569	0.00506435
																								20.8	6.90818	7.7648	0.733792
																								24.96	7.74676	8.3759	0.395815
																								31.616	9.83813	9.01243	0.68178
																								54.912	10.4662	9.46234	1.00766
																								69.056	8.40323	9.16359	0.578156
																								83.2	9.0762	8.73501	0.116408
																								104	7.37523	8.05239	0.45855
																								124.8	7.6825	7.40205	0.0786527
