# Supplementary material for: A simplified characterization of S-adenosyl-l-methionine-consuming enzymes with 1-Step EZ-MTase: a universal and straightforward coupled-assay for in vitro and in vivo setting
Source: Royal Society of Chemistry journal article supplement (doi:10.1039/c7sc02830j), 2017-01-01
Supplement: c7sc02830j4.xlsx [file c7sc02830j4.xlsx]

## Sheet: INSTRUCTIONS
	My 1-Step EZ-MTase ASSAY
	Establish your experimental conditions (e.g. buffer, pH, MTase and other additives' concentrations) using worksheet "Experiment Conditions".
	Once your kinetics are complete, insert your experimental data within worksheet "Plate Reader Data".
	Within worksheet "Coupling Enzyme Parameters", input the pH at which your experiments were performed.
	You will also need to identify the methyl donor you selected for your experiments (SAM, 8-aza-SAM).
	Finally, determine initial velocities using worksheet "My 1-Step EZ-MTase RESULTS".
	Using the least square difference fit and 'SOLVER', this worksheet will deliver the kinetic parameters for your favorite MTase.

## Sheet: Experiment Conditions
My 1-Step EZ-MTase Assay
Experimental set-up and data analysis made easy.
Determine: inhibition parameters for Sinefungin (SIN; Ki) of your favorite MethylTransferase.
	In a UV-star 96-well flat bottom plate (Greiner Bio One, #655801), add the following reagents in rows A and B.
	NOTE:	Row A is dedicated to Blank Samples (Methyl Acceptor is omitted, but SAM and SIN are in solution).
		Data in Row A will account for Background Signal (natural decomposition of SAM and SIN).
		Reagents								#1	#2	#3	#4	#5	#6	#7	#8	#9	#10	#11	#12		Final in well	100	mL
Step 1		WATER								18.6857	18.1857	17.6857	16.6857	15.1857	17.6857	16.6857	18.1857	17.6857	17.1857	16.6857	15.6857
Step 2		BUFFER (stock at 200 mM; your favorite pH)								25	25	25	25	25	25	25	25	25	25	25	25		50	mM
Step 3		GLYCEROL (stock at 50%)								20	20	20	20	20	20	20	20	20	20	20	20		10	%
Step 4		bME (stock at 100 mM)								1	1	1	1	1	1	1	1	1	1	1	1		1	mM
Step 5		MgCl2 (SDMT)			Stock is at:		10		mM	1	1	1	1	1	1	1	1	1	1	1	1		0.1	mM
MIX WELL! Step 6		GsSDMT			Stock is at:		2.44		mM	8	8	8	8	8	8	8	8	8	8	8	8		195.2	nM
Step 7		SAM			Stock is at:		5.87		mM	12.9983	12.9983	12.9983	12.9983	12.9983	12.9983	12.9983	12.9983	12.9983	12.9983	12.9983	12.9983		763	mM
Step 8		Sinefungin			1/50 Stock is at:		162.6		mM	0	0.5	1	2	3.5									various	mM
					1/10 Stock is at:		813		mM						1	2
					Stock is at:		8.13		mM								0.5	1	1.5	2	3
Step 9		TM0936 (final 4 mM)			Stock is at:		48.1		mM	8.31601	8.31601	8.31601	8.31601	8.31601	8.31601	8.31601	8.31601	8.31601	8.31601	8.31601	8.31601		4	mM
Add Methyl Acceptor MIX WELL and transfer 60 mL into plate.		Methyl Acceptor (final constant concentration; for Meas Row B)								5	5	5	5	5	5	5	5	5	5	5	5		5	mM
		Sarcosine or Water (for Blanks Row A)					Stock:	100	mM
		This step STARTS the MethylTranferase Reaction!
READ DIRECTLY!		Final Total Sinefungin concentration (in mM)								0	0.813	1.626	3.252	5.691	8.13	16.26	40.65	81.3	121.95	162.6	243.9
		NOTE:	Cells in GREEN are ACTIVE and MUST be filed by user.

## Sheet: Plate Reader Data
My 1-Step EZ-MTase Assay *** Data Input ***
For each well, your plate reader recorded absorbance values. Absorbance was measured every T second over an extanded period of time.
Step 1:	Please enter the interval T (in second) within the ORANGE cell.							Enter your Sinefungin experimental concentrations withing the BLUE cells.
				Step 2:		Copy/Paste, within GREEN cells, the plate reader values for BLANK experiments (Blk).
				Step 3:		Copy/Paste, within GREEN cells, the plate reader values for MTase experiments (Meas).
				NOTE:		RED cells are not to be modified.
interval T (s)		Time (min)	[SIN] (mM)	0			0.813			1.626			3.252			5.691			8.13			16.26			40.65			81.3			121.95			162.6			243.9
				Blk	Meas		Blk	Meas	0	Blk	Meas	0	Blk	Meas	0	Blk	Meas	0	Blk	Meas	0	Blk	Meas	0	Blk	Meas	0	Blk	Meas	0	Blk	Meas	0	Blk	Meas	0	Blk	Meas	0
4		0		1.699	1.8174	118.4	1.6596	1.8197	160.1	1.6335	1.7451	111.6	1.6901	1.785	94.9	1.6863	1.7019	15.6	1.6513	1.7374	86.1	1.7153	1.7717	56.4	1.737	1.7359	-1.1	1.811	1.8532	42.2	1.9377	1.8928	-44.9	1.9776	1.951	-26.6	2.1321	2.0877	-44.4
		0.0666667		1.7262	1.8445	118.3	1.6578	1.8263	168.5	1.6298	1.7412	111.4	1.7018	1.762	60.2	1.6832	1.7016	18.4	1.6583	1.7432	84.9	1.706	1.7697	63.7	1.7247	1.7363	11.6	1.8031	1.8535	50.4	1.9419	1.8932	-48.7	1.9825	1.9374	-45.1	2.1203	2.1033	-17
		0.133333		1.7153	1.8318	116.5	1.6596	1.8064	146.8	1.63	1.7461	116.1	1.6908	1.7563	65.5	1.6874	1.6866	-0.8	1.6481	1.74	91.9	1.7038	1.7557	51.9	1.7242	1.7451	20.9	1.8026	1.8481	45.5	1.9455	1.893	-52.5	1.9802	1.9471	-33.1	2.1241	2.0866	-37.5
		0.2		1.7162	1.8326	116.4	1.6594	1.8129	153.5	1.638	1.7477	109.7	1.6966	1.7596	63	1.6777	1.695	17.3	1.658	1.7356	77.6	1.7083	1.7744	66.1	1.7226	1.7442	21.6	1.8056	1.8575	51.9	1.9431	1.8942	-48.9	1.9771	1.9379	-39.2	2.1196	2.0958	-23.8
		0.266667		1.7257	1.8352	109.5	1.6571	1.8152	158.1	1.6392	1.7373	98.1	1.6935	1.7684	74.9	1.6876	1.7009	13.3	1.6476	1.7411	93.5	1.7168	1.7647	47.9	1.7253	1.742	16.7	1.8131	1.8542	41.1	1.9393	1.9137	-25.6	1.984	1.9411	-42.9	2.1247	2.0889	-35.8
		0.333333		1.7138	1.8297	115.9	1.6542	1.8024	148.2	1.6444	1.7405	96.1	1.6857	1.7694	83.7	1.6808	1.6959	15.1	1.652	1.7424	90.4	1.7131	1.7661	53	1.7375	1.7414	3.9	1.8117	1.8422	30.5	1.947	1.8922	-54.8	1.9784	1.941	-37.4	2.1301	2.0889	-41.2
		0.4		1.723	1.8365	113.5	1.6532	1.809	155.8	1.6455	1.7379	92.4	1.6919	1.7564	64.5	1.687	1.6986	11.6	1.6562	1.7381	81.9	1.7119	1.7619	50	1.7291	1.7394	10.3	1.8055	1.8537	48.2	1.9489	1.8967	-52.2	1.9805	1.945	-35.5	2.1167	2.092	-24.7
		0.466667		1.7224	1.8434	121	1.6663	1.8099	143.6	1.6356	1.7454	109.8	1.6952	1.7619	66.7	1.6834	1.6953	11.9	1.6587	1.741	82.3	1.7076	1.7691	61.5	1.7254	1.7462	20.8	1.8045	1.8508	46.3	1.9499	1.8958	-54.1	1.9682	1.9412	-27	2.1192	2.0878	-31.4
		0.533333		1.7282	1.8361	107.9	1.6583	1.81	151.7	1.6363	1.7401	103.8	1.6915	1.7547	63.2	1.6777	1.6965	18.8	1.6553	1.738	82.7	1.711	1.7589	47.9	1.7354	1.7489	13.5	1.8183	1.8527	34.4	1.939	1.9006	-38.4	1.9959	1.9487	-47.2	2.1208	2.0997	-21.1
		0.6		1.7203	1.8345	114.2	1.6538	1.8083	154.5	1.6379	1.736	98.1	1.6894	1.7613	71.9	1.6811	1.6931	12	1.6555	1.7443	88.8	1.7096	1.7586	49	1.7325	1.734	1.5	1.8156	1.8576	42	1.9448	1.8901	-54.7	1.9873	1.9425	-44.8	2.1219	2.1025	-19.4
		0.666667		1.719	1.8429	123.9	1.66	1.8041	144.1	1.638	1.7451	107.1	1.6923	1.7584	66.1	1.6843	1.7036	19.3	1.6537	1.7346	80.9	1.7038	1.7641	60.3	1.7345	1.7469	12.4	1.807	1.8658	58.8	1.9528	1.8925	-60.3	1.982	1.9381	-43.9	2.1308	2.1074	-23.4
		0.733333		1.7168	1.8377	120.9	1.662	1.805	143	1.6371	1.7318	94.7	1.6938	1.7513	57.5	1.6865	1.6987	12.2	1.6496	1.7431	93.5	1.7161	1.7633	47.2	1.7335	1.7446	11.1	1.8195	1.8539	34.4	1.9463	1.8901	-56.2	1.9911	1.9472	-43.9	2.1154	2.0998	-15.6
		0.8		1.7187	1.8378	119.1	1.6573	1.8087	151.4	1.6427	1.7419	99.2	1.6967	1.7595	62.8	1.6926	1.7096	17	1.6538	1.7361	82.3	1.707	1.7625	55.5	1.7383	1.7505	12.2	1.8169	1.8553	38.4	1.9459	1.9126	-33.3	1.9764	1.9422	-34.2	2.1321	2.1044	-27.7
		0.866667		1.7238	1.8402	116.4	1.6672	1.7939	126.7	1.6386	1.7406	102	1.6959	1.7576	61.7	1.6877	1.7012	13.5	1.655	1.7392	84.2	1.7121	1.7692	57.1	1.7412	1.7453	4.1	1.8241	1.8529	28.8	1.9618	1.9014	-60.4	1.9981	1.9571	-41	2.1361	2.0999	-36.2
		0.933333		1.7184	1.843	124.6	1.6584	1.8073	148.9	1.6477	1.7304	82.7	1.6887	1.7516	62.9	1.6881	1.698	9.9	1.6536	1.7416	88	1.7227	1.7632	40.5	1.7308	1.7501	19.3	1.8119	1.8604	48.5	1.9459	1.8977	-48.2	1.9864	1.9516	-34.8	2.1261	2.0992	-26.9
		1		1.7207	1.8372	116.5	1.6562	1.8044	148.2	1.6412	1.7458	104.6	1.699	1.7548	55.8	1.6823	1.6945	12.2	1.6528	1.7531	100.3	1.7165	1.761	44.5	1.7342	1.7453	11.1	1.8203	1.8593	39	1.9473	1.9021	-45.2	1.9931	1.9504	-42.7	2.1308	2.0893	-41.5
		1.06667		1.729	1.8299	100.9	1.6668	1.8065	139.7	1.6381	1.7375	99.4	1.6975	1.7521	54.6	1.6889	1.6975	8.6	1.6642	1.7382	74	1.7204	1.7593	38.9	1.7295	1.7384	8.9	1.8167	1.8549	38.2	1.9535	1.8939	-59.6	1.9844	1.9517	-32.7	2.1275	2.1047	-22.8
		1.13333		1.7284	1.8444	116	1.6649	1.8052	140.3	1.6381	1.7446	106.5	1.7032	1.7547	51.5	1.6894	1.7053	15.9	1.656	1.7458	89.8	1.7149	1.7652	50.3	1.7284	1.7486	20.2	1.8147	1.8564	41.7	1.9449	1.9083	-36.6	1.9951	1.9515	-43.6	2.127	2.097	-30
		1.2		1.7268	1.8462	119.4	1.6599	1.8099	150	1.6432	1.749	105.8	1.6974	1.7615	64.1	1.6832	1.7009	17.7	1.6557	1.7473	91.6	1.7199	1.7685	48.6	1.7407	1.7491	8.4	1.8149	1.8494	34.5	1.9477	1.901	-46.7	1.995	1.9478	-47.2	2.1235	2.0903	-33.2
		1.26667		1.7268	1.8384	111.6	1.6556	1.8062	150.6	1.6436	1.7331	89.5	1.7014	1.7605	59.1	1.6901	1.7079	17.8	1.6595	1.7456	86.1	1.7202	1.7641	43.9	1.7447	1.7506	5.9	1.8159	1.8618	45.9	1.9403	1.9022	-38.1	1.9855	1.9539	-31.6	2.1213	2.1092	-12.1
		1.33333		1.7256	1.8353	109.7	1.6668	1.8085	141.7	1.6526	1.7364	83.8	1.7073	1.7522	44.9	1.6943	1.7072	12.9	1.6624	1.7362	73.8	1.7302	1.7581	27.9	1.7409	1.7512	10.3	1.8235	1.8625	39	1.9504	1.9076	-42.8	1.9941	1.9479	-46.2	2.1208	2.1072	-13.6
		1.4		1.7277	1.8492	121.5	1.6585	1.8052	146.7	1.6424	1.7362	93.8	1.6943	1.7467	52.4	1.7034	1.6928	-10.6	1.6601	1.7493	89.2	1.7106	1.774	63.4	1.7273	1.7467	19.4	1.8256	1.8504	24.8	1.9522	1.9034	-48.8	1.9937	1.9455	-48.2	2.1219	2.0951	-26.8
		1.46667		1.7222	1.8301	107.9	1.6608	1.8117	150.9	1.6457	1.7321	86.4	1.6982	1.7529	54.7	1.6978	1.7021	4.3	1.6576	1.7407	83.1	1.7199	1.7629	43	1.7331	1.7505	17.4	1.8224	1.856	33.6	1.9473	1.9087	-38.6	1.9926	1.9535	-39.1	2.1439	2.099	-44.9
		1.53333		1.7229	1.8418	118.9	1.6581	1.8012	143.1	1.6425	1.7406	98.1	1.7029	1.7534	50.5	1.6921	1.6971	5	1.6609	1.7364	75.5	1.7185	1.7675	49	1.7415	1.7509	9.4	1.8227	1.8614	38.7	1.9431	1.9006	-42.5	1.9933	1.9623	-31	2.1414	2.1005	-40.9
		1.6		1.722	1.8362	114.2	1.6592	1.8019	142.7	1.6448	1.7306	85.8	1.7028	1.758	55.2	1.6978	1.6961	-1.7	1.6672	1.7453	78.1	1.7199	1.7622	42.3	1.7443	1.7469	2.6	1.8211	1.8557	34.6	1.9493	1.9072	-42.1	2.0022	1.9564	-45.8	2.1262	2.0999	-26.3
		1.66667		1.7321	1.8389	106.8	1.6633	1.7999	136.6	1.6529	1.7346	81.7	1.7037	1.7555	51.8	1.6951	1.7004	5.3	1.6614	1.7419	80.5	1.7138	1.7665	52.7	1.742	1.7419	-0.1	1.8277	1.8567	29	1.9529	1.8987	-54.2	1.9813	1.9561	-25.2	2.1344	2.1022	-32.2
		1.73333		1.7211	1.8309	109.8	1.6644	1.796	131.6	1.6478	1.7318	84	1.695	1.7507	55.7	1.6907	1.7002	9.5	1.6593	1.7426	83.3	1.7206	1.7635	42.9	1.7345	1.7483	13.8	1.8219	1.8539	32	1.9547	1.904	-50.7	1.9808	1.9481	-32.7	2.1303	2.0959	-34.4
		1.8		1.7242	1.834	109.8	1.6608	1.7994	138.6	1.6462	1.734	87.8	1.6989	1.748	49.1	1.6946	1.696	1.4	1.6644	1.7424	78	1.7243	1.76	35.7	1.7401	1.7476	7.5	1.8227	1.868	45.3	1.9449	1.9016	-43.3	1.9954	1.9573	-38.1	2.1357	2.1214	-14.3
		1.86667		1.7236	1.8295	105.9	1.665	1.8002	135.2	1.6535	1.7336	80.1	1.6963	1.7506	54.3	1.6997	1.6965	-3.2	1.6567	1.7386	81.9	1.7175	1.7683	50.8	1.742	1.7549	12.9	1.8183	1.8597	41.4	1.9598	1.9073	-52.5	1.9877	1.9451	-42.6	2.1217	2.103	-18.7
		1.93333		1.728	1.8371	109.1	1.6692	1.7971	127.9	1.6494	1.7335	84.1	1.7014	1.751	49.6	1.6927	1.7004	7.7	1.6545	1.7472	92.7	1.7164	1.7708	54.4	1.7407	1.7482	7.5	1.8178	1.8625	44.7	1.9447	1.8986	-46.1	1.9946	1.9619	-32.7	2.137	2.106	-31
		2		1.7279	1.8395	111.6	1.6639	1.8035	139.6	1.6597	1.7278	68.1	1.7066	1.7494	42.8	1.694	1.6962	2.2	1.6579	1.7435	85.6	1.7113	1.7705	59.2	1.7376	1.7483	10.7	1.8225	1.8544	31.9	1.9609	1.896	-64.9	1.9885	1.9434	-45.1	2.1254	2.1043	-21.1
		2.06667		1.7262	1.8401	113.9	1.6624	1.7972	134.8	1.6509	1.7318	80.9	1.7023	1.7489	46.6	1.6972	1.7028	5.6	1.6605	1.7446	84.1	1.7194	1.7657	46.3	1.7395	1.7415	2	1.8228	1.8568	34	1.9625	1.8942	-68.3	1.9884	1.9659	-22.5	2.1313	2.1057	-25.6
		2.13333		1.722	1.8424	120.4	1.6726	1.8002	127.6	1.6495	1.7328	83.3	1.7009	1.7538	52.9	1.7024	1.6909	-11.5	1.6661	1.7385	72.4	1.7229	1.7688	45.9	1.74	1.7461	6.1	1.8181	1.8601	42	1.9526	1.9037	-48.9	2.0014	1.9516	-49.8	2.1264	2.0942	-32.2
		2.2		1.7284	1.834	105.6	1.6612	1.7971	135.9	1.6427	1.7342	91.5	1.7046	1.7475	42.9	1.7073	1.6934	-13.9	1.6634	1.739	75.6	1.7212	1.7572	36	1.7387	1.7479	9.2	1.8213	1.8571	35.8	1.9551	1.9042	-50.9	1.9929	1.9529	-40	2.1339	2.1053	-28.6
		2.26667		1.7338	1.8328	99	1.6682	1.7955	127.3	1.6434	1.7297	86.3	1.7003	1.759	58.7	1.6881	1.6906	2.5	1.6643	1.7336	69.3	1.7157	1.7647	49	1.7465	1.7494	2.9	1.8255	1.8569	31.4	1.951	1.9014	-49.6	1.9932	1.9602	-33	2.1313	2.0979	-33.4
		2.33333		1.7332	1.8283	95.1	1.6635	1.7966	133.1	1.6434	1.7298	86.4	1.703	1.7455	42.5	1.6959	1.7	4.1	1.6622	1.746	83.8	1.7191	1.7725	53.4	1.7347	1.7504	15.7	1.8227	1.8577	35	1.9499	1.9057	-44.2	1.99	1.9498	-40.2	2.126	2.0994	-26.6
		2.4		1.7192	1.8382	119	1.6668	1.8053	138.5	1.6456	1.7336	88	1.703	1.7514	48.4	1.6928	1.6941	1.3	1.6562	1.7395	83.3	1.716	1.7628	46.8	1.7375	1.7476	10.1	1.8164	1.8577	41.3	1.9484	1.902	-46.4	1.9947	1.9596	-35.1	2.1227	2.108	-14.7
		2.46667		1.7288	1.8367	107.9	1.6724	1.8008	128.4	1.644	1.7234	79.4	1.7022	1.743	40.8	1.6972	1.6928	-4.4	1.6664	1.7416	75.2	1.7286	1.7637	35.1	1.7354	1.7475	12.1	1.8297	1.8613	31.6	1.953	1.8978	-55.2	1.9927	1.9512	-41.5	2.1383	2.0969	-41.4
		2.53333		1.7325	1.8387	106.2	1.6695	1.7934	123.9	1.6459	1.7265	80.6	1.7156	1.7426	27	1.6939	1.6964	2.5	1.6635	1.7439	80.4	1.718	1.7699	51.9	1.7412	1.7441	2.9	1.8206	1.858	37.4	1.9523	1.9055	-46.8	1.9912	1.9513	-39.9	2.1385	2.0979	-40.6
		2.6		1.7318	1.8367	104.9	1.6677	1.789	121.3	1.6508	1.7322	81.4	1.7117	1.7478	36.1	1.6893	1.6929	3.6	1.6558	1.7357	79.9	1.7226	1.7688	46.2	1.737	1.7483	11.3	1.8203	1.855	34.7	1.9425	1.9125	-30	1.991	1.9529	-38.1	2.1204	2.0987	-21.7
		2.66667		1.7263	1.836	109.7	1.6647	1.7966	131.9	1.6488	1.7331	84.3	1.7043	1.7532	48.9	1.6896	1.7031	13.5	1.6684	1.7422	73.8	1.7138	1.7617	47.9	1.7402	1.7433	3.1	1.8186	1.854	35.4	1.9567	1.897	-59.7	1.993	1.9524	-40.6	2.1343	2.0952	-39.1
		2.73333		1.735	1.8288	93.8	1.6673	1.7921	124.8	1.6523	1.7293	77	1.7028	1.7494	46.6	1.6944	1.6975	3.1	1.669	1.7421	73.1	1.7235	1.766	42.5	1.7473	1.7494	2.1	1.8204	1.86	39.6	1.952	1.8996	-52.4	1.9945	1.9586	-35.9	2.1405	2.1061	-34.4
		2.8		1.7228	1.8285	105.7	1.6606	1.7988	138.2	1.6547	1.7205	65.8	1.7093	1.7397	30.4	1.7011	1.6931	-8	1.6639	1.7395	75.6	1.7243	1.7588	34.5	1.7346	1.7497	15.1	1.828	1.8502	22.2	1.9561	1.9041	-52	2.0045	1.9637	-40.8	2.134	2.0971	-36.9
		2.86667		1.7248	1.8316	106.8	1.6759	1.8025	126.6	1.6475	1.7281	80.6	1.7022	1.7459	43.7	1.7042	1.6913	-12.9	1.6695	1.7399	70.4	1.7346	1.7587	24.1	1.7433	1.7565	13.2	1.8281	1.8625	34.4	1.953	1.9006	-52.4	1.9959	1.9563	-39.6	2.1321	2.1087	-23.4
		2.93333		1.7299	1.8302	100.3	1.673	1.7953	122.3	1.6644	1.7234	59	1.7092	1.7469	37.7	1.6988	1.6883	-10.5	1.6665	1.744	77.5	1.7197	1.7639	44.2	1.7478	1.7469	-0.9	1.8181	1.8595	41.4	1.9624	1.8973	-65.1	1.9986	1.956	-42.6	2.1314	2.1034	-28
		3		1.7337	1.8315	97.8	1.68	1.7949	114.9	1.6472	1.7307	83.5	1.7138	1.7476	33.8	1.6939	1.6989	5	1.6713	1.7356	64.3	1.7246	1.7574	32.8	1.7372	1.7511	13.9	1.8241	1.8633	39.2	1.9517	1.9056	-46.1	1.9939	1.9517	-42.2	2.1369	2.1022	-34.7
		3.06667		1.7403	1.8276	87.3	1.6762	1.7931	116.9	1.6424	1.7343	91.9	1.7109	1.7476	36.7	1.7042	1.6888	-15.4	1.668	1.7381	70.1	1.729	1.7706	41.6	1.7441	1.7505	6.4	1.8229	1.8537	30.8	1.9543	1.9019	-52.4	2.0025	1.9505	-52	2.1343	2.1031	-31.2
		3.13333		1.7344	1.8243	89.9	1.6722	1.7951	122.9	1.6547	1.7252	70.5	1.7043	1.7456	41.3	1.6958	1.6916	-4.2	1.667	1.7357	68.7	1.7323	1.7663	34	1.7463	1.7473	1	1.8289	1.8616	32.7	1.9604	1.9003	-60.1	1.996	1.9472	-48.8	2.1306	2.1018	-28.8
		3.2		1.735	1.8324	97.4	1.6702	1.7961	125.9	1.6452	1.743	97.8	1.7085	1.7368	28.3	1.7035	1.6935	-10	1.6664	1.741	74.6	1.7266	1.7585	31.9	1.7521	1.7489	-3.2	1.8272	1.8568	29.6	1.9612	1.9061	-55.1	1.9986	1.9548	-43.8	2.1328	2.1072	-25.6
		3.26667		1.7276	1.8273	99.7	1.6712	1.7857	114.5	1.6544	1.7248	70.4	1.7111	1.7474	36.3	1.6992	1.6931	-6.1	1.6704	1.7425	72.1	1.7183	1.7599	41.6	1.7555	1.7483	-7.2	1.8235	1.8551	31.6	1.9532	1.8988	-54.4	1.9953	1.949	-46.3	2.1348	2.1038	-31
		3.33333		1.7364	1.8301	93.7	1.6667	1.7917	125	1.6454	1.729	83.6	1.7166	1.7447	28.1	1.6978	1.6928	-5	1.6635	1.7388	75.3	1.7288	1.7665	37.7	1.7413	1.7522	10.9	1.8258	1.8604	34.6	1.9452	1.9046	-40.6	2.0016	1.9554	-46.2	2.1389	2.1138	-25.1
		3.4		1.7377	1.8288	91.1	1.6762	1.7935	117.3	1.6417	1.7306	88.9	1.7138	1.7404	26.6	1.6926	1.6931	0.5	1.6653	1.7389	73.6	1.7243	1.7518	27.5	1.7449	1.7566	11.7	1.8271	1.8614	34.3	1.9624	1.9089	-53.5	1.9928	1.9591	-33.7	2.1404	2.1054	-35
		3.46667		1.7298	1.8245	94.7	1.6603	1.7984	138.1	1.6636	1.7267	63.1	1.7061	1.744	37.9	1.7015	1.6894	-12.1	1.6761	1.7346	58.5	1.7332	1.7652	32	1.7438	1.7495	5.7	1.8213	1.8523	31	1.9626	1.8914	-71.2	2.0029	1.9603	-42.6	2.1359	2.1033	-32.6
		3.53333		1.7282	1.8258	97.6	1.6714	1.7916	120.2	1.6466	1.7229	76.3	1.7103	1.7367	26.4	1.7067	1.6933	-13.4	1.6723	1.7372	64.9	1.7222	1.7778	55.6	1.7529	1.746	-6.9	1.8253	1.8532	27.9	1.962	1.9013	-60.7	2.0026	1.9672	-35.4	2.1382	2.1049	-33.3
		3.6		1.7339	1.8361	102.2	1.6727	1.7838	111.1	1.6471	1.7218	74.7	1.7067	1.7423	35.6	1.7044	1.6903	-14.1	1.6623	1.7474	85.1	1.7257	1.758	32.3	1.7497	1.753	3.3	1.8257	1.8577	32	1.9632	1.8982	-65	1.9899	1.9621	-27.8	2.1337	2.1111	-22.6
		3.66667		1.7348	1.8184	83.6	1.6672	1.7974	130.2	1.6472	1.7231	75.9	1.7064	1.7442	37.8	1.6976	1.6975	-0.1	1.6612	1.7347	73.5	1.7223	1.7637	41.4	1.7558	1.7516	-4.2	1.8273	1.8607	33.4	1.9591	1.9036	-55.5	2.0089	1.9657	-43.2	2.1469	2.1127	-34.2
		3.73333		1.7254	1.823	97.6	1.6671	1.7887	121.6	1.6504	1.7223	71.9	1.7133	1.7407	27.4	1.6997	1.6887	-11	1.6732	1.7446	71.4	1.7297	1.7581	28.4	1.7466	1.7463	-0.3	1.8363	1.859	22.7	1.9544	1.8989	-55.5	2.0044	1.9579	-46.5	2.136	2.1062	-29.8
		3.8		1.7324	1.8268	94.4	1.6857	1.7973	111.6	1.6548	1.7284	73.6	1.7105	1.749	38.5	1.6968	1.6888	-8	1.672	1.7406	68.6	1.7365	1.758	21.5	1.7526	1.7412	-11.4	1.8257	1.8588	33.1	1.954	1.8959	-58.1	2.0021	1.9535	-48.6	2.1345	2.1065	-28
		3.86667		1.7411	1.8248	83.7	1.6753	1.789	113.7	1.6532	1.7252	72	1.708	1.7425	34.5	1.7039	1.6922	-11.7	1.6761	1.7418	65.7	1.7309	1.7555	24.6	1.7484	1.7451	-3.3	1.8235	1.8513	27.8	1.9633	1.901	-62.3	1.9869	1.962	-24.9	2.1277	2.1052	-22.5
		3.93333		1.7339	1.8338	99.9	1.6803	1.7818	101.5	1.6487	1.7192	70.5	1.7182	1.7386	20.4	1.7002	1.6929	-7.3	1.6701	1.7285	58.4	1.7266	1.7625	35.9	1.7498	1.7491	-0.7	1.8249	1.8551	30.2	1.9616	1.909	-52.6	2.0029	1.9495	-53.4	2.1382	2.1031	-35.1
		4		1.7341	1.8215	87.4	1.6775	1.7938	116.3	1.6589	1.7264	67.5	1.7083	1.7416	33.3	1.7036	1.7004	-3.2	1.6678	1.7329	65.1	1.7256	1.7611	35.5	1.7489	1.7511	2.2	1.8295	1.8515	22	1.9549	1.9037	-51.2	1.9917	1.952	-39.7	2.1472	2.1104	-36.8
		4.06667		1.7289	1.8212	92.3	1.672	1.7953	123.3	1.6514	1.7239	72.5	1.7102	1.7392	29	1.7045	1.6916	-12.9	1.6697	1.7364	66.7	1.7303	1.7581	27.8	1.7451	1.7448	-0.3	1.8264	1.8561	29.7	1.9584	1.9062	-52.2	2.0023	1.9661	-36.2	2.1457	2.0979	-47.8
		4.13333		1.7354	1.8243	88.9	1.6709	1.784	113.1	1.6479	1.7249	77	1.7025	1.738	35.5	1.7061	1.6957	-10.4	1.6675	1.7317	64.2	1.7305	1.7622	31.7	1.7449	1.7563	11.4	1.8284	1.8582	29.8	1.9584	1.9006	-57.8	1.9966	1.9562	-40.4	2.1456	2.1105	-35.1
		4.2		1.7323	1.8218	89.5	1.6729	1.785	112.1	1.6574	1.7182	60.8	1.7146	1.7342	19.6	1.6942	1.6982	4	1.6621	1.7323	70.2	1.7252	1.7604	35.2	1.7503	1.7549	4.6	1.8287	1.8587	30	1.9671	1.9	-67.1	1.9996	1.9552	-44.4	2.1366	2.1001	-36.5
		4.26667		1.7369	1.8268	89.9	1.6748	1.7835	108.7	1.6536	1.7246	71	1.7095	1.7465	37	1.7013	1.6869	-14.4	1.6699	1.7258	55.9	1.7356	1.7608	25.2	1.7495	1.7476	-1.9	1.8237	1.8505	26.8	1.959	1.9024	-56.6	1.9926	1.9553	-37.3	2.1355	2.1018	-33.7
		4.33333		1.7309	1.8159	85	1.6807	1.7834	102.7	1.6467	1.7143	67.6	1.7201	1.7423	22.2	1.6967	1.6912	-5.5	1.6719	1.7376	65.7	1.7225	1.7531	30.6	1.7513	1.7506	-0.7	1.8247	1.8496	24.9	1.9651	1.9068	-58.3	2.0088	1.9499	-58.9	2.1327	2.1102	-22.5
		4.4		1.7307	1.816	85.3	1.68	1.7902	110.2	1.6568	1.7196	62.8	1.7045	1.7327	28.2	1.7051	1.684	-21.1	1.672	1.7299	57.9	1.728	1.7623	34.3	1.7505	1.7568	6.3	1.8203	1.8675	47.2	1.9653	1.8928	-72.5	1.9947	1.9562	-38.5	2.1337	2.1082	-25.5
		4.46667		1.734	1.817	83	1.6739	1.7861	112.2	1.6506	1.7199	69.3	1.7161	1.735	18.9	1.7013	1.6842	-17.1	1.67	1.7375	67.5	1.7285	1.7577	29.2	1.7563	1.7446	-11.7	1.8297	1.8533	23.6	1.9543	1.8987	-55.6	2.0013	1.9537	-47.6	2.1351	2.1115	-23.6
		4.53333		1.7395	1.8184	78.9	1.6715	1.7761	104.6	1.6517	1.7254	73.7	1.7127	1.7443	31.6	1.7059	1.6926	-13.3	1.6722	1.7348	62.6	1.734	1.7565	22.5	1.7498	1.7444	-5.4	1.8251	1.8475	22.4	1.9581	1.9036	-54.5	1.9955	1.9599	-35.6	2.1375	2.106	-31.5
		4.6		1.7271	1.823	95.9	1.6757	1.7765	100.8	1.6517	1.7162	64.5	1.7229	1.7319	9	1.6989	1.6892	-9.7	1.6634	1.7377	74.3	1.7257	1.7593	33.6	1.75	1.7461	-3.9	1.8364	1.8532	16.8	1.9574	1.9023	-55.1	2.0061	1.9624	-43.7	2.1343	2.105	-29.3
		4.66667		1.732	1.8133	81.3	1.6717	1.7799	108.2	1.6568	1.7223	65.5	1.7158	1.7357	19.9	1.6962	1.6991	2.9	1.6676	1.7269	59.3	1.7262	1.7536	27.4	1.7476	1.7518	4.2	1.8266	1.8492	22.6	1.9656	1.9033	-62.3	1.9945	1.9528	-41.7	2.1334	2.101	-32.4
		4.73333		1.7291	1.8186	89.5	1.6712	1.7845	113.3	1.6448	1.7167	71.9	1.7125	1.7426	30.1	1.6971	1.6841	-13	1.6739	1.7321	58.2	1.7272	1.7518	24.6	1.7472	1.7442	-3	1.8295	1.8505	21	1.9571	1.8966	-60.5	2.0003	1.9651	-35.2	2.1376	2.1028	-34.8
		4.8		1.7408	1.8076	66.8	1.6754	1.7872	111.8	1.6564	1.7242	67.8	1.7187	1.7441	25.4	1.7043	1.691	-13.3	1.6687	1.7333	64.6	1.7367	1.7534	16.7	1.7449	1.7438	-1.1	1.8365	1.8496	13.1	1.9673	1.8976	-69.7	2.0104	1.9658	-44.6	2.1408	2.1062	-34.6
		4.86667		1.7367	1.8181	81.4	1.6783	1.7799	101.6	1.6613	1.715	53.7	1.7189	1.7311	12.2	1.6996	1.6865	-13.1	1.6698	1.7303	60.5	1.7368	1.7591	22.3	1.7479	1.7519	4	1.8343	1.8533	19	1.9728	1.9063	-66.5	2.005	1.9549	-50.1	2.1407	2.1068	-33.9
		4.93333		1.7385	1.8074	68.9	1.6818	1.7848	103	1.6553	1.7148	59.5	1.7148	1.7314	16.6	1.7072	1.6849	-22.3	1.6751	1.7266	51.5	1.7309	1.7609	30	1.7488	1.7443	-4.5	1.8245	1.8478	23.3	1.9641	1.9001	-64	1.9928	1.9507	-42.1	2.1376	2.1162	-21.4
		5		1.7329	1.8243	91.4	1.6702	1.7878	117.6	1.6519	1.7289	77	1.7154	1.7408	25.4	1.7006	1.678	-22.6	1.6718	1.7308	59	1.7262	1.7514	25.2	1.7528	1.7487	-4.1	1.8401	1.8515	11.4	1.9656	1.9031	-62.5	1.9992	1.9574	-41.8	2.1443	2.1014	-42.9
		5.06667		1.7363	1.8136	77.3	1.6748	1.7816	106.8	1.649	1.7267	77.7	1.7129	1.7303	17.4	1.7037	1.6909	-12.8	1.669	1.7364	67.4	1.7398	1.754	14.2	1.7409	1.7344	-6.5	1.8346	1.8553	20.7	1.9636	1.9011	-62.5	2.003	1.9526	-50.4	2.1436	2.0977	-45.9
		5.13333		1.7357	1.8219	86.2	1.6737	1.7774	103.7	1.6554	1.7209	65.5	1.7101	1.7344	24.3	1.712	1.6902	-21.8	1.6717	1.7354	63.7	1.7311	1.7492	18.1	1.7521	1.751	-1.1	1.835	1.8512	16.2	1.9686	1.9083	-60.3	2.0032	1.9634	-39.8	2.1289	2.1044	-24.5
		5.2		1.7287	1.8171	88.4	1.681	1.7783	97.3	1.6524	1.7053	52.9	1.7073	1.7349	27.6	1.7037	1.6867	-17	1.6762	1.728	51.8	1.7323	1.7477	15.4	1.7535	1.7379	-15.6	1.8295	1.8554	25.9	1.9739	1.9017	-72.2	2.0082	1.9525	-55.7	2.1372	2.1147	-22.5
		5.26667		1.7315	1.8067	75.2	1.6783	1.7869	108.6	1.653	1.7282	75.2	1.7128	1.7302	17.4	1.7014	1.6915	-9.9	1.6716	1.727	55.4	1.7226	1.7613	38.7	1.7464	1.7522	5.8	1.8406	1.8505	9.9	1.9656	1.8982	-67.4	2.0076	1.9503	-57.3	2.1491	2.1101	-39
		5.33333		1.7319	1.8065	74.6	1.6836	1.7807	97.1	1.6516	1.7135	61.9	1.7151	1.7319	16.8	1.7052	1.6848	-20.4	1.6798	1.7295	49.7	1.7313	1.7567	25.4	1.7467	1.7395	-7.2	1.8306	1.8526	22	1.9629	1.9041	-58.8	1.9977	1.9523	-45.4	2.135	2.0962	-38.8
		5.4		1.7334	1.817	83.6	1.6726	1.7786	106	1.6592	1.7103	51.1	1.7176	1.7308	13.2	1.7057	1.6799	-25.8	1.6727	1.7294	56.7	1.7325	1.7547	22.2	1.7413	1.7464	5.1	1.8342	1.8442	10	1.9669	1.9077	-59.2	1.9964	1.966	-30.4	2.1383	2.1002	-38.1
		5.46667		1.7287	1.8132	84.5	1.6706	1.7724	101.8	1.6574	1.71	52.6	1.7177	1.7252	7.5	1.7004	1.6806	-19.8	1.6719	1.7333	61.4	1.7289	1.7515	22.6	1.7486	1.747	-1.6	1.8268	1.8507	23.9	1.9702	1.9142	-56	1.9939	1.9603	-33.6	2.1525	2.1054	-47.1
		5.53333		1.7371	1.8088	71.7	1.6733	1.7764	103.1	1.6588	1.7074	48.6	1.7199	1.7239	4	1.7008	1.6826	-18.2	1.6699	1.7198	49.9	1.7371	1.7548	17.7	1.7491	1.7441	-5	1.827	1.8527	25.7	1.9663	1.8892	-77.1	1.995	1.9576	-37.4	2.132	2.1139	-18.1
		5.6		1.7364	1.8127	76.3	1.6763	1.7776	101.3	1.657	1.7176	60.6	1.7133	1.728	14.7	1.7048	1.6849	-19.9	1.6791	1.7297	50.6	1.7412	1.7565	15.3	1.7458	1.7439	-1.9	1.8336	1.8615	27.9	1.9645	1.9019	-62.6	2.0088	1.9607	-48.1	2.1262	2.1013	-24.9
		5.66667		1.7338	1.804	70.2	1.682	1.7745	92.5	1.6489	1.7162	67.3	1.7179	1.7222	4.3	1.717	1.6903	-26.7	1.6805	1.7267	46.2	1.739	1.7582	19.2	1.7443	1.7422	-2.1	1.8259	1.8577	31.8	1.9662	1.9012	-65	1.9982	1.9562	-42	2.1502	2.1123	-37.9
		5.73333		1.7362	1.8098	73.6	1.6793	1.7718	92.5	1.6517	1.7097	58	1.7096	1.7328	23.2	1.6998	1.6808	-19	1.6744	1.7232	48.8	1.7324	1.7552	22.8	1.7581	1.7365	-21.6	1.8267	1.8465	19.8	1.9746	1.9072	-67.4	2.0052	1.9539	-51.3	2.1299	2.0989	-31
		5.8		1.7306	1.81	79.4	1.6779	1.7806	102.7	1.6508	1.7088	58	1.7142	1.7181	3.9	1.7095	1.677	-32.5	1.67	1.7247	54.7	1.7276	1.7559	28.3	1.7598	1.7357	-24.1	1.8309	1.853	22.1	1.9725	1.8936	-78.9	2.006	1.9574	-48.6	2.143	2.1076	-35.4
		5.86667		1.7334	1.7995	66.1	1.6722	1.7761	103.9	1.6454	1.7025	57.1	1.7104	1.7361	25.7	1.6999	1.6814	-18.5	1.6685	1.7224	53.9	1.7245	1.7487	24.2	1.746	1.7414	-4.6	1.833	1.8491	16.1	1.9685	1.9074	-61.1	2.004	1.9612	-42.8	2.1354	2.0998	-35.6
		5.93333		1.7352	1.8132	78	1.6718	1.7666	94.8	1.6518	1.7098	58	1.7137	1.7317	18	1.7145	1.6772	-37.3	1.667	1.7309	63.9	1.7321	1.7499	17.8	1.7558	1.7476	-8.2	1.8234	1.8491	25.7	1.969	1.9023	-66.7	2.0037	1.9536	-50.1	2.1461	2.1173	-28.8
		6		1.737	1.8062	69.2	1.6744	1.776	101.6	1.6608	1.7054	44.6	1.7102	1.724	13.8	1.7148	1.6805	-34.3	1.6744	1.721	46.6	1.7248	1.7504	25.6	1.7494	1.7417	-7.7	1.8357	1.8428	7.1	1.958	1.9014	-56.6	1.9949	1.9613	-33.6	2.1326	2.1101	-22.5
		6.06667		1.7364	1.8141	77.7	1.6754	1.7775	102.1	1.651	1.7096	58.6	1.7149	1.7301	15.2	1.7035	1.6793	-24.2	1.6717	1.7253	53.6	1.725	1.7453	20.3	1.7565	1.7367	-19.8	1.836	1.8501	14.1	1.9555	1.9044	-51.1	2	1.9623	-37.7	2.1427	2.102	-40.7
		6.13333		1.7336	1.8125	78.9	1.6729	1.7771	104.2	1.6512	1.7122	61	1.7204	1.7242	3.8	1.7025	1.6797	-22.8	1.6713	1.7252	53.9	1.7313	1.7509	19.6	1.7591	1.7449	-14.2	1.8333	1.8446	11.3	1.9694	1.8932	-76.2	2.0143	1.9674	-46.9	2.1381	2.103	-35.1
		6.2		1.7383	1.8009	62.6	1.674	1.7692	95.2	1.6576	1.7132	55.6	1.7161	1.7229	6.8	1.701	1.6762	-24.8	1.6823	1.7225	40.2	1.7286	1.7511	22.5	1.7528	1.7405	-12.3	1.8377	1.8529	15.2	1.9678	1.8966	-71.2	1.998	1.9588	-39.2	2.1395	2.1101	-29.4
		6.26667		1.7327	1.8001	67.4	1.6801	1.7776	97.5	1.652	1.7016	49.6	1.7164	1.7232	6.8	1.7013	1.6828	-18.5	1.6672	1.7165	49.3	1.7316	1.753	21.4	1.7566	1.742	-14.6	1.8371	1.8505	13.4	1.9738	1.9036	-70.2	1.9996	1.9607	-38.9	2.1381	2.0997	-38.4
		6.33333		1.7256	1.8006	75	1.6786	1.7684	89.8	1.6538	1.7096	55.8	1.7092	1.725	15.8	1.7025	1.6765	-26	1.6704	1.7275	57.1	1.7314	1.7571	25.7	1.7525	1.7414	-11.1	1.829	1.8488	19.8	1.9702	1.8997	-70.5	2.0083	1.967	-41.3	2.1396	2.1142	-25.4
		6.4		1.7289	1.7978	68.9	1.6778	1.7709	93.1	1.6506	1.7148	64.2	1.7119	1.7274	15.5	1.7095	1.6895	-20	1.6694	1.7193	49.9	1.724	1.7473	23.3	1.7466	1.7319	-14.7	1.8318	1.8448	13	1.9639	1.8949	-69	2.0006	1.9601	-40.5	2.1381	2.0997	-38.4
		6.46667		1.7311	1.8036	72.5	1.6776	1.7644	86.8	1.6581	1.7037	45.6	1.7142	1.7211	6.9	1.7009	1.6662	-34.7	1.6723	1.7183	46	1.7407	1.7464	5.7	1.7467	1.7514	4.7	1.8323	1.8507	18.4	1.9637	1.8923	-71.4	1.9998	1.9526	-47.2	2.1409	2.104	-36.9
		6.53333		1.7285	1.7971	68.6	1.6761	1.7686	92.5	1.6524	1.7049	52.5	1.7191	1.7155	-3.6	1.6992	1.6725	-26.7	1.6666	1.7213	54.7	1.7257	1.7426	16.9	1.7505	1.7426	-7.9	1.8367	1.8515	14.8	1.9657	1.9035	-62.2	2.0005	1.9614	-39.1	2.1328	2.1044	-28.4
		6.6		1.7337	1.799	65.3	1.6816	1.7668	85.2	1.6627	1.703	40.3	1.7178	1.7248	7	1.7094	1.6748	-34.6	1.6726	1.7184	45.8	1.7291	1.7515	22.4	1.7536	1.737	-16.6	1.835	1.8534	18.4	1.9629	1.8999	-63	2.007	1.9572	-49.8	2.1401	2.1044	-35.7
		6.66667		1.7309	1.7952	64.3	1.6825	1.7668	84.3	1.6545	1.7042	49.7	1.7142	1.7277	13.5	1.7088	1.6771	-31.7	1.6684	1.7184	50	1.7318	1.7469	15.1	1.7539	1.7367	-17.2	1.8332	1.8458	12.6	1.9608	1.9115	-49.3	2.0042	1.9524	-51.8	2.1371	2.1033	-33.8
		6.73333		1.7398	1.7952	55.4	1.6711	1.7616	90.5	1.6594	1.7035	44.1	1.7221	1.7334	11.3	1.7117	1.6737	-38	1.6732	1.7194	46.2	1.7294	1.7496	20.2	1.751	1.7378	-13.2	1.8405	1.8525	12	1.9613	1.8965	-64.8	2.0007	1.9503	-50.4	2.1423	2.1063	-36
		6.8		1.7388	1.8022	63.4	1.687	1.7717	84.7	1.6554	1.7025	47.1	1.7115	1.7166	5.1	1.7026	1.6683	-34.3	1.6695	1.7177	48.2	1.7268	1.741	14.2	1.755	1.7344	-20.6	1.8281	1.846	17.9	1.966	1.8942	-71.8	1.9995	1.9545	-45	2.1444	2.1018	-42.6
		6.86667		1.7318	1.7999	68.1	1.6752	1.762	86.8	1.653	1.705	52	1.717	1.73	13	1.7093	1.6718	-37.5	1.6731	1.7188	45.7	1.7298	1.7443	14.5	1.7578	1.7403	-17.5	1.8168	1.8532	36.4	1.9735	1.8988	-74.7	2.0086	1.9659	-42.7	2.1345	2.0959	-38.6
		6.93333		1.7411	1.7953	54.2	1.6792	1.7629	83.7	1.6586	1.7008	42.2	1.7144	1.7187	4.3	1.7034	1.6752	-28.2	1.6727	1.7145	41.8	1.729	1.7408	11.8	1.7515	1.7359	-15.6	1.8347	1.8441	9.4	1.974	1.8948	-79.2	2.0055	1.9522	-53.3	2.1403	2.1	-40.3
		7		1.7457	1.8023	56.6	1.6794	1.7587	79.3	1.6562	1.696	39.8	1.7118	1.7198	8	1.7095	1.6669	-42.6	1.6699	1.7156	45.7	1.7232	1.7464	23.2	1.7519	1.7388	-13.1	1.8287	1.8467	18	1.9673	1.9002	-67.1	2.0047	1.9529	-51.8	2.1472	2.1062	-41
		7.06667		1.7374	1.7944	57	1.6818	1.7732	91.4	1.663	1.7011	38.1	1.712	1.7199	7.9	1.7087	1.6718	-36.9	1.6738	1.72	46.2	1.733	1.7397	6.7	1.755	1.7375	-17.5	1.8382	1.8491	10.9	1.9631	1.8956	-67.5	2.0028	1.9507	-52.1	2.13	2.0984	-31.6
		7.13333		1.7322	1.7958	63.6	1.6728	1.7647	91.9	1.6618	1.7046	42.8	1.7253	1.7239	-1.4	1.7018	1.6718	-30	1.6775	1.7126	35.1	1.734	1.7509	16.9	1.7485	1.7333	-15.2	1.8329	1.8448	11.9	1.9754	1.9015	-73.9	2.0043	1.951	-53.3	2.1363	2.0993	-37
		7.2		1.7377	1.7991	61.4	1.6841	1.7638	79.7	1.6544	1.705	50.6	1.7206	1.7202	-0.4	1.7002	1.6702	-30	1.6707	1.7079	37.2	1.7318	1.744	12.2	1.7602	1.7412	-19	1.836	1.8405	4.5	1.9652	1.8909	-74.3	2.0005	1.9499	-50.6	2.1377	2.1045	-33.2
		7.26667		1.7367	1.7903	53.6	1.6795	1.7591	79.6	1.66	1.7004	40.4	1.7194	1.7261	6.7	1.7067	1.667	-39.7	1.6776	1.7113	33.7	1.7319	1.7416	9.7	1.7555	1.7307	-24.8	1.8337	1.8531	19.4	1.9635	1.8893	-74.2	2.0108	1.9508	-60	2.1414	2.1097	-31.7
		7.33333		1.7395	1.789	49.5	1.6799	1.7701	90.2	1.6517	1.6975	45.8	1.7125	1.7198	7.3	1.7053	1.6715	-33.8	1.6763	1.7218	45.5	1.7259	1.7421	16.2	1.7545	1.7464	-8.1	1.834	1.8457	11.7	1.9629	1.8971	-65.8	2.0138	1.9697	-44.1	2.1362	2.1075	-28.7
		7.4		1.7347	1.791	56.3	1.6776	1.7659	88.3	1.6516	1.6934	41.8	1.7182	1.7203	2.1	1.7027	1.662	-40.7	1.6715	1.7095	38	1.735	1.738	3	1.7566	1.7367	-19.9	1.823	1.8533	30.3	1.9632	1.899	-64.2	2.0009	1.9513	-49.6	2.1373	2.1154	-21.9
		7.46667		1.7342	1.7875	53.3	1.6705	1.7597	89.2	1.6529	1.6925	39.6	1.7138	1.7126	-1.2	1.7079	1.6681	-39.8	1.6728	1.7164	43.6	1.7277	1.7397	12	1.7582	1.7308	-27.4	1.8398	1.848	8.2	1.9668	1.8954	-71.4	2.0046	1.9506	-54	2.1401	2.0999	-40.2
		7.53333		1.739	1.7935	54.5	1.683	1.7642	81.2	1.6514	1.703	51.6	1.7079	1.7148	6.9	1.7079	1.6666	-41.3	1.668	1.7088	40.8	1.7291	1.7435	14.4	1.7483	1.7324	-15.9	1.8271	1.8367	9.6	1.961	1.8975	-63.5	2.0025	1.9543	-48.2	2.1402	2.1061	-34.1
		7.6		1.7389	1.7863	47.4	1.6838	1.7619	78.1	1.6492	1.6957	46.5	1.711	1.7205	9.5	1.703	1.6669	-36.1	1.6673	1.7078	40.5	1.7287	1.7389	10.2	1.7477	1.7344	-13.3	1.837	1.8429	5.9	1.9635	1.8877	-75.8	2.0134	1.9554	-58	2.14	2.1094	-30.6
		7.66667		1.7343	1.7868	52.5	1.6759	1.7537	77.8	1.6517	1.6931	41.4	1.7158	1.7122	-3.6	1.6986	1.6652	-33.4	1.68	1.7067	26.7	1.7326	1.7344	1.8	1.7488	1.7338	-15	1.8298	1.8365	6.7	1.9658	1.8939	-71.9	2.0034	1.9587	-44.7	2.145	2.1002	-44.8
		7.73333		1.7414	1.7902	48.8	1.6819	1.7624	80.5	1.6554	1.7009	45.5	1.72	1.7127	-7.3	1.7071	1.6746	-32.5	1.68	1.7195	39.5	1.7292	1.739	9.8	1.7547	1.7372	-17.5	1.8315	1.8478	16.3	1.9602	1.8897	-70.5	2.006	1.951	-55	2.1449	2.0987	-46.2
		7.8		1.7338	1.788	54.2	1.6768	1.7633	86.5	1.6565	1.6975	41	1.7142	1.7098	-4.4	1.7091	1.6631	-46	1.6762	1.7096	33.4	1.7293	1.7462	16.9	1.748	1.734	-14	1.8374	1.8493	11.9	1.9632	1.888	-75.2	1.9993	1.944	-55.3	2.1495	2.0936	-55.9
		7.86667		1.7381	1.7857	47.6	1.6805	1.7544	73.9	1.6572	1.7107	53.5	1.7173	1.7058	-11.5	1.7048	1.6658	-39	1.6722	1.7103	38.1	1.728	1.7435	15.5	1.7581	1.7294	-28.7	1.8337	1.8484	14.7	1.9671	1.8959	-71.2	1.9994	1.957	-42.4	2.1403	2.1105	-29.8
		7.93333		1.7336	1.7896	56	1.6837	1.7536	69.9	1.6638	1.6976	33.8	1.717	1.7175	0.5	1.7135	1.6758	-37.7	1.6689	1.7113	42.4	1.7329	1.7384	5.5	1.7584	1.7335	-24.9	1.8296	1.8478	18.2	1.9637	1.8928	-70.9	2.0023	1.9532	-49.1	2.1334	2.0849	-48.5
		8		1.7362	1.7805	44.3	1.6729	1.7637	90.8	1.6562	1.6978	41.6	1.7168	1.7112	-5.6	1.7069	1.6663	-40.6	1.6751	1.7076	32.5	1.7299	1.7409	11	1.7518	1.7324	-19.4	1.8307	1.8357	5	1.9729	1.8874	-85.5	2.0042	1.957	-47.2	2.1479	2.1007	-47.2
		8.06667		1.7355	1.7857	50.2	1.6782	1.7591	80.9	1.6578	1.6962	38.4	1.7167	1.7151	-1.6	1.7074	1.6667	-40.7	1.6694	1.7095	40.1	1.7301	1.736	5.9	1.7468	1.7309	-15.9	1.8309	1.849	18.1	1.9776	1.897	-80.6	2.0049	1.9472	-57.7	2.1383	2.1011	-37.2
		8.13333		1.7372	1.7795	42.3	1.68	1.7499	69.9	1.6594	1.6958	36.4	1.7238	1.7134	-10.4	1.7045	1.6631	-41.4	1.6727	1.7058	33.1	1.7291	1.7327	3.6	1.7508	1.7395	-11.3	1.8281	1.8395	11.4	1.9625	1.8968	-65.7	2.003	1.9486	-54.4	2.1385	2.1091	-29.4
		8.2		1.736	1.7849	48.9	1.6715	1.7558	84.3	1.6575	1.6905	33	1.7207	1.7067	-14	1.7098	1.6667	-43.1	1.6711	1.7039	32.8	1.7333	1.7412	7.9	1.7568	1.7377	-19.1	1.8302	1.8402	10	1.959	1.9001	-58.9	1.9944	1.9421	-52.3	2.1356	2.1019	-33.7
		8.26667		1.7313	1.7794	48.1	1.673	1.7501	77.1	1.6604	1.6972	36.8	1.7165	1.7072	-9.3	1.7144	1.6662	-48.2	1.6706	1.7013	30.7	1.7265	1.739	12.5	1.7558	1.7304	-25.4	1.825	1.8406	15.6	1.9675	1.8894	-78.1	1.9987	1.9574	-41.3	2.1489	2.1015	-47.4
		8.33333		1.7401	1.778	37.9	1.6844	1.7631	78.7	1.652	1.6906	38.6	1.7131	1.7128	-0.3	1.6977	1.6661	-31.6	1.6733	1.706	32.7	1.7348	1.7337	-1.1	1.7516	1.7299	-21.7	1.836	1.8469	10.9	1.9741	1.8868	-87.3	2.001	1.9492	-51.8	2.1367	2.1062	-30.5
		8.4		1.746	1.7846	38.6	1.68	1.7531	73.1	1.6587	1.689	30.3	1.7155	1.7067	-8.8	1.7069	1.6655	-41.4	1.6733	1.7057	32.4	1.7285	1.733	4.5	1.7496	1.7318	-17.8	1.8347	1.8477	13	1.9619	1.8897	-72.2	2.0031	1.9512	-51.9	2.1354	2.0928	-42.6
		8.46667		1.7395	1.7838	44.3	1.6774	1.7508	73.4	1.6563	1.6996	43.3	1.7127	1.7093	-3.4	1.7008	1.6595	-41.3	1.6839	1.7041	20.2	1.731	1.7406	9.6	1.7555	1.7294	-26.1	1.8401	1.8494	9.3	1.9614	1.8913	-70.1	2.0008	1.9465	-54.3	2.1392	2.0982	-41
		8.53333		1.7376	1.7803	42.7	1.6776	1.7506	73	1.6583	1.6905	32.2	1.7181	1.7034	-14.7	1.7035	1.658	-45.5	1.6812	1.7001	18.9	1.7297	1.736	6.3	1.7433	1.7306	-12.7	1.8396	1.8513	11.7	1.9608	1.8935	-67.3	2.0096	1.9427	-66.9	2.1531	2.0982	-54.9
		8.6		1.7334	1.7796	46.2	1.6793	1.7487	69.4	1.6564	1.6966	40.2	1.7138	1.7116	-2.2	1.7074	1.6672	-40.2	1.6687	1.7007	32	1.7285	1.7354	6.9	1.7465	1.727	-19.5	1.8274	1.8336	6.2	1.9636	1.9015	-62.1	2.0118	1.9482	-63.6	2.1377	2.1041	-33.6
		8.66667		1.7335	1.7845	51	1.6766	1.7566	80	1.6684	1.689	20.6	1.7143	1.7048	-9.5	1.7041	1.6631	-41	1.6719	1.6989	27	1.7344	1.7359	1.5	1.7527	1.7282	-24.5	1.8357	1.8423	6.6	1.9691	1.8873	-81.8	2.0141	1.9517	-62.4	2.1402	2.0908	-49.4
		8.73333		1.7397	1.7827	43	1.684	1.7499	65.9	1.6611	1.6974	36.3	1.7182	1.7104	-7.8	1.7047	1.6611	-43.6	1.6751	1.7011	26	1.7376	1.7374	-0.2	1.7542	1.7281	-26.1	1.8406	1.8373	-3.3	1.9612	1.8925	-68.7	2.0002	1.957	-43.2	2.1397	2.0937	-46
		8.8		1.7364	1.7738	37.4	1.6802	1.7516	71.4	1.662	1.6924	30.4	1.7225	1.7031	-19.4	1.7041	1.6627	-41.4	1.6688	1.6999	31.1	1.7257	1.7301	4.4	1.7527	1.7247	-28	1.8292	1.8423	13.1	1.9644	1.8837	-80.7	2.0001	1.9492	-50.9	2.1542	2.0929	-61.3
		8.86667		1.736	1.7749	38.9	1.6732	1.7439	70.7	1.6625	1.6895	27	1.7188	1.7051	-13.7	1.7071	1.6589	-48.2	1.6737	1.7093	35.6	1.7275	1.7275	0	1.7479	1.7326	-15.3	1.8332	1.8321	-1.1	1.9701	1.8871	-83	2.0113	1.946	-65.3	2.1491	2.093	-56.1
		8.93333		1.7361	1.7709	34.8	1.6798	1.7472	67.4	1.6569	1.689	32.1	1.7137	1.7032	-10.5	1.7097	1.6615	-48.2	1.6767	1.699	22.3	1.7331	1.7299	-3.2	1.7563	1.7222	-34.1	1.8252	1.838	12.8	1.9621	1.8901	-72	1.9945	1.9541	-40.4	2.1406	2.0964	-44.2
		9		1.7378	1.7787	40.9	1.6761	1.7479	71.8	1.6607	1.6941	33.4	1.7114	1.7051	-6.3	1.7031	1.6598	-43.3	1.6767	1.7052	28.5	1.732	1.7399	7.9	1.7464	1.7294	-17	1.8314	1.8397	8.3	1.9594	1.8839	-75.5	2.0058	1.9504	-55.4	2.1427	2.094	-48.7
		9.06667		1.7383	1.7772	38.9	1.6811	1.7475	66.4	1.6645	1.6917	27.2	1.713	1.7087	-4.3	1.7059	1.6584	-47.5	1.6742	1.698	23.8	1.7276	1.7362	8.6	1.7468	1.7221	-24.7	1.8334	1.8376	4.2	1.9576	1.8921	-65.5	2.007	1.9414	-65.6	2.1442	2.0961	-48.1
		9.13333		1.7428	1.7724	29.6	1.6767	1.7478	71.1	1.6547	1.6867	32	1.7151	1.6953	-19.8	1.7067	1.6622	-44.5	1.6812	1.6983	17.1	1.7379	1.7228	-15.1	1.757	1.7294	-27.6	1.8288	1.8294	0.6	1.9611	1.8868	-74.3	2.0131	1.9532	-59.9	2.1437	2.0969	-46.8
		9.2		1.7327	1.7748	42.1	1.6754	1.7425	67.1	1.6511	1.6839	32.8	1.717	1.7101	-6.9	1.7088	1.6556	-53.2	1.681	1.7045	23.5	1.7256	1.7265	0.9	1.7572	1.7274	-29.8	1.8416	1.8331	-8.5	1.975	1.8911	-83.9	2.0097	1.9347	-75	2.1423	2.1044	-37.9
		9.26667		1.7425	1.7713	28.8	1.6733	1.7472	73.9	1.6526	1.691	38.4	1.7249	1.6956	-29.3	1.7045	1.6582	-46.3	1.6793	1.7028	23.5	1.7321	1.7365	4.4	1.7531	1.7227	-30.4	1.8333	1.8453	12	1.9656	1.8903	-75.3	2.0146	1.9434	-71.2	2.1325	2.0935	-39
		9.33333		1.7378	1.7791	41.3	1.678	1.7433	65.3	1.6639	1.692	28.1	1.7231	1.7049	-18.2	1.7147	1.6583	-56.4	1.6739	1.6953	21.4	1.7336	1.7263	-7.3	1.756	1.7331	-22.9	1.8338	1.8355	1.7	1.9565	1.8812	-75.3	2.0065	1.9508	-55.7	2.1361	2.0969	-39.2
		9.4		1.7356	1.7727	37.1	1.6784	1.7462	67.8	1.6558	1.6886	32.8	1.7248	1.7009	-23.9	1.7095	1.6604	-49.1	1.6856	1.693	7.4	1.7283	1.7252	-3.1	1.7553	1.7155	-39.8	1.8336	1.8365	2.9	1.9553	1.8906	-64.7	1.9932	1.953	-40.2	2.1321	2.1005	-31.6
		9.46667		1.733	1.775	42	1.6863	1.7415	55.2	1.6527	1.6852	32.5	1.7142	1.7041	-10.1	1.6997	1.6539	-45.8	1.677	1.6976	20.6	1.7263	1.7236	-2.7	1.7544	1.726	-28.4	1.8327	1.8418	9.1	1.9678	1.8891	-78.7	2.0066	1.9555	-51.1	2.1446	2.0906	-54
		9.53333		1.7368	1.777	40.2	1.6727	1.7426	69.9	1.6588	1.6783	19.5	1.7189	1.702	-16.9	1.7042	1.6623	-41.9	1.678	1.7047	26.7	1.7282	1.7312	3	1.7527	1.7323	-20.4	1.8323	1.8403	8	1.9745	1.8865	-88	2.0119	1.9438	-68.1	2.1427	2.0945	-48.2
		9.6		1.7355	1.7707	35.2	1.6783	1.7502	71.9	1.6622	1.6956	33.4	1.7106	1.6968	-13.8	1.7165	1.6533	-63.2	1.6769	1.6981	21.2	1.7277	1.7229	-4.8	1.7534	1.7272	-26.2	1.8298	1.8301	0.3	1.9622	1.8825	-79.7	2.001	1.9484	-52.6	2.1483	2.1015	-46.8
		9.66667		1.7417	1.765	23.3	1.6761	1.7474	71.3	1.6547	1.6857	31	1.7257	1.6972	-28.5	1.7086	1.6552	-53.4	1.6733	1.7021	28.8	1.7259	1.7301	4.2	1.7534	1.7209	-32.5	1.8358	1.8418	6	1.9675	1.8883	-79.2	1.998	1.9408	-57.2	2.1431	2.0863	-56.8
		9.73333		1.7368	1.7777	40.9	1.6899	1.7516	61.7	1.6543	1.6773	23	1.7247	1.6968	-27.9	1.7056	1.6553	-50.3	1.6738	1.6918	18	1.7333	1.7353	2	1.7493	1.7206	-28.7	1.8285	1.8347	6.2	1.9598	1.8797	-80.1	1.9945	1.949	-45.5	2.1473	2.0989	-48.4
		9.8		1.7455	1.7703	24.8	1.6829	1.7401	57.2	1.6656	1.6784	12.8	1.7135	1.7009	-12.6	1.7027	1.6508	-51.9	1.6708	1.6947	23.9	1.7286	1.7261	-2.5	1.7533	1.727	-26.3	1.8335	1.8319	-1.6	1.9668	1.8879	-78.9	2.0071	1.9459	-61.2	2.1324	2.0918	-40.6
		9.86667		1.7356	1.7611	25.5	1.6746	1.7446	70	1.6524	1.6769	24.5	1.7193	1.7045	-14.8	1.7084	1.6472	-61.2	1.68	1.7005	20.5	1.7251	1.7291	4	1.7574	1.7224	-35	1.831	1.8365	5.5	1.9641	1.8904	-73.7	2.0204	1.9482	-72.2	2.1438	2.0943	-49.5
		9.93333		1.7379	1.7793	41.4	1.6839	1.7453	61.4	1.6558	1.6774	21.6	1.7182	1.6958	-22.4	1.7031	1.6596	-43.5	1.6713	1.6948	23.5	1.7271	1.7234	-3.7	1.7509	1.7217	-29.2	1.8324	1.8392	6.8	1.9689	1.8847	-84.2	2.0061	1.9528	-53.3	2.1461	2.0869	-59.2
		10		1.7419	1.7726	30.7	1.678	1.7359	57.9	1.6528	1.6866	33.8	1.722	1.6999	-22.1	1.7057	1.6529	-52.8	1.6758	1.6909	15.1	1.7276	1.7224	-5.2	1.7493	1.7276	-21.7	1.8344	1.8439	9.5	1.9667	1.8803	-86.4	2.006	1.9431	-62.9	2.149	2.0934	-55.6
		10.0667		1.7341	1.7629	28.8	1.68	1.7402	60.2	1.6587	1.6864	27.7	1.7172	1.6981	-19.1	1.7093	1.6577	-51.6	1.6779	1.6888	10.9	1.7336	1.7207	-12.9	1.7552	1.7204	-34.8	1.8352	1.8315	-3.7	1.9663	1.8885	-77.8	2.0008	1.9503	-50.5	2.1333	2.0892	-44.1
		10.1333		1.7308	1.7637	32.9	1.6858	1.7355	49.7	1.6559	1.6815	25.6	1.7149	1.6932	-21.7	1.712	1.6532	-58.8	1.6717	1.6921	20.4	1.7322	1.724	-8.2	1.7575	1.7242	-33.3	1.8348	1.8372	2.4	1.9688	1.8947	-74.1	2.0058	1.9431	-62.7	2.144	2.1022	-41.8
		10.2		1.7377	1.7644	26.7	1.6732	1.743	69.8	1.6586	1.6844	25.8	1.7214	1.6962	-25.2	1.7101	1.6506	-59.5	1.6765	1.6887	12.2	1.7244	1.722	-2.4	1.7632	1.7266	-36.6	1.8302	1.8295	-0.7	1.9638	1.8854	-78.4	1.9979	1.951	-46.9	2.1438	2.0963	-47.5
		10.2667		1.7338	1.7687	34.9	1.6765	1.7445	68	1.6563	1.6737	17.4	1.7153	1.6966	-18.7	1.7124	1.6489	-63.5	1.6747	1.6992	24.5	1.7314	1.7265	-4.9	1.7499	1.7216	-28.3	1.8338	1.8327	-1.1	1.966	1.8825	-83.5	2.0023	1.9455	-56.8	2.13	2.1055	-24.5
		10.3333		1.7422	1.7712	29	1.6841	1.7416	57.5	1.6531	1.6746	21.5	1.72	1.6994	-20.6	1.7061	1.6538	-52.3	1.6756	1.6882	12.6	1.7304	1.7215	-8.9	1.7563	1.7381	-18.2	1.8262	1.836	9.8	1.9678	1.8812	-86.6	2.0159	1.9435	-72.4	2.1425	2.0882	-54.3
		10.4		1.7406	1.7603	19.7	1.6741	1.7385	64.4	1.6636	1.6808	17.2	1.7158	1.6973	-18.5	1.7105	1.6471	-63.4	1.6782	1.6851	6.9	1.7288	1.7207	-8.1	1.7547	1.7322	-22.5	1.8287	1.8281	-0.6	1.9637	1.8922	-71.5	2.0078	1.9398	-68	2.1408	2.094	-46.8
		10.4667		1.7367	1.7684	31.7	1.6767	1.7387	62	1.6568	1.6798	23	1.7212	1.6937	-27.5	1.7114	1.6509	-60.5	1.6775	1.6909	13.4	1.7199	1.7238	3.9	1.7519	1.7169	-35	1.8252	1.8328	7.6	1.9658	1.8802	-85.6	2.0034	1.9412	-62.2	2.1414	2.0845	-56.9
		10.5333		1.7437	1.7703	26.6	1.6676	1.7334	65.8	1.655	1.6823	27.3	1.7149	1.6982	-16.7	1.7073	1.649	-58.3	1.6721	1.6921	20	1.7318	1.7294	-2.4	1.7539	1.7315	-22.4	1.8267	1.8365	9.8	1.9709	1.8819	-89	2.0047	1.9359	-68.8	2.1426	2.0918	-50.8
		10.6		1.7372	1.7597	22.5	1.6767	1.7339	57.2	1.6523	1.672	19.7	1.7184	1.6987	-19.7	1.7145	1.6494	-65.1	1.6712	1.6925	21.3	1.7298	1.7217	-8.1	1.7552	1.726	-29.2	1.827	1.8365	9.5	1.9661	1.8869	-79.2	2.001	1.9498	-51.2	2.1302	2.094	-36.2
		10.6667		1.7369	1.7574	20.5	1.6798	1.7342	54.4	1.6595	1.6683	8.8	1.7183	1.6899	-28.4	1.71	1.6479	-62.1	1.6758	1.6839	8.1	1.7248	1.7243	-0.5	1.7546	1.722	-32.6	1.8316	1.8373	5.7	1.9698	1.8909	-78.9	1.9994	1.9457	-53.7	2.1415	2.0916	-49.9
		10.7333		1.7386	1.7596	21	1.6818	1.7374	55.6	1.6533	1.6833	30	1.7247	1.6935	-31.2	1.7039	1.6501	-53.8	1.678	1.6878	9.8	1.7295	1.7201	-9.4	1.7498	1.7161	-33.7	1.8266	1.8315	4.9	1.9626	1.8856	-77	2.004	1.9516	-52.4	2.1395	2.096	-43.5
		10.8		1.7356	1.769	33.4	1.6831	1.7319	48.8	1.6546	1.6746	20	1.7267	1.6857	-41	1.7017	1.6482	-53.5	1.6797	1.6833	3.6	1.733	1.7209	-12.1	1.7527	1.7185	-34.2	1.8323	1.8368	4.5	1.9638	1.8843	-79.5	2.0042	1.9485	-55.7	2.1348	2.0951	-39.7
		10.8667		1.7402	1.7623	22.1	1.6784	1.7374	59	1.6564	1.6778	21.4	1.7194	1.6997	-19.7	1.7153	1.6415	-73.8	1.6743	1.6841	9.8	1.7273	1.7163	-11	1.7504	1.7155	-34.9	1.8371	1.8259	-11.2	1.9668	1.8849	-81.9	2.0024	1.9328	-69.6	2.1419	2.0962	-45.7
		10.9333		1.7322	1.7559	23.7	1.6798	1.7297	49.9	1.651	1.684	33	1.7116	1.6876	-24	1.7087	1.6445	-64.2	1.6698	1.6853	15.5	1.7341	1.72	-14.1	1.7545	1.7159	-38.6	1.8413	1.8353	-6	1.9637	1.8802	-83.5	2.0002	1.9423	-57.9	2.1365	2.1013	-35.2
		11		1.7368	1.7645	27.7	1.6731	1.7306	57.5	1.6494	1.6792	29.8	1.7216	1.6867	-34.9	1.7024	1.6444	-58	1.6782	1.6801	1.9	1.7259	1.7122	-13.7	1.7508	1.7134	-37.4	1.8247	1.8234	-1.3	1.9643	1.8811	-83.2	2.0131	1.9404	-72.7	2.1376	2.0965	-41.1
		11.0667		1.7387	1.7599	21.2	1.6823	1.7266	44.3	1.6584	1.6731	14.7	1.7209	1.6861	-34.8	1.7051	1.6405	-64.6	1.6743	1.6862	11.9	1.7297	1.7146	-15.1	1.7523	1.7152	-37.1	1.83	1.8406	10.6	1.9617	1.8823	-79.4	1.9917	1.9464	-45.3	2.1311	2.1053	-25.8
		11.1333		1.7305	1.7642	33.7	1.6721	1.7383	66.2	1.6502	1.6691	18.9	1.7149	1.6863	-28.6	1.7027	1.6372	-65.5	1.6746	1.6882	13.6	1.7305	1.7175	-13	1.7596	1.718	-41.6	1.8358	1.8285	-7.3	1.9595	1.8871	-72.4	1.9961	1.9506	-45.5	2.148	2.0937	-54.3
		11.2		1.7363	1.7543	18	1.6821	1.729	46.9	1.6549	1.6782	23.3	1.7167	1.6846	-32.1	1.7041	1.6476	-56.5	1.6859	1.6957	9.8	1.7371	1.7167	-20.4	1.7646	1.724	-40.6	1.8301	1.8333	3.2	1.9664	1.8848	-81.6	2.0127	1.9408	-71.9	2.135	2.0925	-42.5
		11.2667		1.7302	1.754	23.8	1.6752	1.7252	50	1.6532	1.6683	15.1	1.7179	1.6838	-34.1	1.7054	1.6414	-64	1.6712	1.6809	9.7	1.7345	1.7246	-9.9	1.7533	1.7197	-33.6	1.8304	1.8277	-2.7	1.9657	1.88	-85.7	1.9982	1.9355	-62.7	2.1417	2.0922	-49.5
		11.3333		1.7352	1.7552	20	1.6857	1.7326	46.9	1.6522	1.6704	18.2	1.7242	1.6984	-25.8	1.7068	1.6423	-64.5	1.6776	1.6804	2.8	1.7293	1.7151	-14.2	1.752	1.7176	-34.4	1.8426	1.829	-13.6	1.9683	1.8922	-76.1	2.0041	1.9451	-59	2.1481	2.0967	-51.4
		11.4		1.7397	1.7558	16.1	1.6765	1.7258	49.3	1.6499	1.6692	19.3	1.7167	1.6846	-32.1	1.7034	1.6418	-61.6	1.6724	1.6893	16.9	1.734	1.7184	-15.6	1.7522	1.7197	-32.5	1.8388	1.8261	-12.7	1.9662	1.8871	-79.1	2.0081	1.9458	-62.3	2.1379	2.0959	-42
		11.4667		1.7365	1.7519	15.4	1.6782	1.7258	47.6	1.6544	1.669	14.6	1.7217	1.6845	-37.2	1.7004	1.6505	-49.9	1.6732	1.677	3.8	1.7318	1.7192	-12.6	1.7467	1.7209	-25.8	1.8364	1.8296	-6.8	1.9705	1.8789	-91.6	2.0007	1.936	-64.7	2.1436	2.0997	-43.9
		11.5333		1.7433	1.7553	12	1.6811	1.7298	48.7	1.6558	1.6671	11.3	1.7121	1.6873	-24.8	1.7041	1.6407	-63.4	1.6711	1.6781	7	1.7273	1.7181	-9.2	1.7487	1.7202	-28.5	1.8406	1.8303	-10.3	1.9616	1.8828	-78.8	2.0016	1.9433	-58.3	2.1388	2.0951	-43.7
		11.6		1.7396	1.7521	12.5	1.675	1.7273	52.3	1.6524	1.6755	23.1	1.7251	1.6809	-44.2	1.7017	1.6399	-61.8	1.6728	1.6789	6.1	1.7296	1.7127	-16.9	1.7462	1.7134	-32.8	1.8284	1.8431	14.7	1.9759	1.8742	-101.7	2.0032	1.9407	-62.5	2.1404	2.0932	-47.2
		11.6667		1.7314	1.7527	21.3	1.6729	1.7253	52.4	1.6574	1.6705	13.1	1.7194	1.6874	-32	1.7031	1.6444	-58.7	1.6777	1.6822	4.5	1.7314	1.7073	-24.1	1.7481	1.7165	-31.6	1.8317	1.8408	9.1	1.9581	1.8822	-75.9	2.0081	1.9421	-66	2.1376	2.097	-40.6
		11.7333		1.7407	1.7499	9.2	1.6796	1.729	49.4	1.6539	1.6777	23.8	1.7094	1.679	-30.4	1.7064	1.6496	-56.8	1.6769	1.6805	3.6	1.7217	1.7146	-7.1	1.7542	1.7228	-31.4	1.8292	1.8303	1.1	1.9642	1.8786	-85.6	1.9964	1.9421	-54.3	2.1322	2.0964	-35.8
		11.8		1.7387	1.751	12.3	1.6812	1.7264	45.2	1.6557	1.6645	8.8	1.7153	1.6823	-33	1.7055	1.6467	-58.8	1.6671	1.6802	13.1	1.7315	1.7088	-22.7	1.7533	1.7201	-33.2	1.8339	1.8328	-1.1	1.9692	1.8897	-79.5	1.9973	1.9371	-60.2	2.1369	2.0927	-44.2
		11.8667		1.7344	1.7514	17	1.6727	1.7251	52.4	1.6571	1.6661	9	1.7143	1.6847	-29.6	1.7039	1.641	-62.9	1.6686	1.6893	20.7	1.7281	1.7106	-17.5	1.7541	1.7031	-51	1.829	1.8225	-6.5	1.9698	1.8853	-84.5	2.007	1.9447	-62.3	2.14	2.1048	-35.2
		11.9333		1.7427	1.7502	7.5	1.6747	1.7217	47	1.651	1.6661	15.1	1.721	1.6751	-45.9	1.7033	1.6396	-63.7	1.6737	1.6937	20	1.7277	1.7108	-16.9	1.7477	1.7156	-32.1	1.8226	1.8332	10.6	1.9585	1.8834	-75.1	1.9996	1.9402	-59.4	2.1362	2.0973	-38.9
		12		1.7376	1.7454	7.8	1.6741	1.7229	48.8	1.6552	1.6677	12.5	1.7215	1.6727	-48.8	1.7112	1.6426	-68.6	1.6718	1.68	8.2	1.7349	1.7048	-30.1	1.7467	1.7119	-34.8	1.8282	1.833	4.8	1.967	1.8765	-90.5	2.0116	1.9461	-65.5	2.138	2.0897	-48.3
		12.0667		1.74	1.7593	19.3	1.6778	1.7277	49.9	1.6557	1.6698	14.1	1.7118	1.6786	-33.2	1.7035	1.6429	-60.6	1.6758	1.6825	6.7	1.734	1.706	-28	1.7508	1.7129	-37.9	1.8396	1.8324	-7.2	1.9666	1.8768	-89.8	1.9996	1.9446	-55	2.1378	2.0875	-50.3
		12.1333		1.7317	1.7502	18.5	1.6768	1.7195	42.7	1.6515	1.6618	10.3	1.7207	1.6931	-27.6	1.7026	1.637	-65.6	1.6705	1.6794	8.9	1.7367	1.712	-24.7	1.7492	1.724	-25.2	1.8363	1.8276	-8.7	1.9665	1.8882	-78.3	2.0066	1.9376	-69	2.1537	2.0872	-66.5
		12.2		1.7329	1.7434	10.5	1.6771	1.7233	46.2	1.651	1.6642	13.2	1.712	1.6814	-30.6	1.7025	1.6396	-62.9	1.6664	1.6762	9.8	1.7395	1.7131	-26.4	1.7577	1.7143	-43.4	1.8416	1.835	-6.6	1.9619	1.8879	-74	2.0117	1.9428	-68.9	2.14	2.0988	-41.2
		12.2667		1.7325	1.7458	13.3	1.6751	1.7225	47.4	1.6592	1.6657	6.5	1.715	1.6788	-36.2	1.7063	1.6432	-63.1	1.6767	1.6796	2.9	1.7306	1.7112	-19.4	1.7626	1.7146	-48	1.8344	1.8263	-8.1	1.9663	1.8736	-92.7	2.0114	1.9459	-65.5	2.1373	2.0998	-37.5
		12.3333		1.7364	1.7434	7	1.6708	1.7253	54.5	1.6532	1.6627	9.5	1.7052	1.6804	-24.8	1.7087	1.6324	-76.3	1.6732	1.6792	6	1.7221	1.7047	-17.4	1.7506	1.712	-38.6	1.8299	1.8218	-8.1	1.9709	1.8787	-92.2	2.0024	1.9324	-70	2.1415	2.0918	-49.7
		12.4		1.7404	1.7419	1.5	1.6758	1.7201	44.3	1.6532	1.6699	16.7	1.7167	1.68	-36.7	1.7034	1.6374	-66	1.6691	1.6746	5.5	1.7264	1.7099	-16.5	1.7548	1.7036	-51.2	1.8398	1.8218	-18	1.9657	1.883	-82.7	2.0017	1.9492	-52.5	2.1353	2.0853	-50
		12.4667		1.734	1.7456	11.6	1.669	1.7233	54.3	1.6553	1.6639	8.6	1.7128	1.6842	-28.6	1.7047	1.63	-74.7	1.6681	1.6796	11.5	1.7351	1.7148	-20.3	1.7575	1.7111	-46.4	1.8369	1.8239	-13	1.964	1.87	-94	2.0001	1.9468	-53.3	2.1363	2.0951	-41.2
		12.5333		1.7346	1.7445	9.9	1.6776	1.7213	43.7	1.6553	1.6597	4.4	1.7155	1.6813	-34.2	1.7138	1.6451	-68.7	1.6737	1.6741	0.4	1.7336	1.7158	-17.8	1.7505	1.7054	-45.1	1.8333	1.8332	-0.1	1.9708	1.8782	-92.6	2.0149	1.943	-71.9	2.1462	2.0797	-66.5
		12.6		1.7389	1.7525	13.6	1.6789	1.7199	41	1.6521	1.6574	5.3	1.7144	1.6797	-34.7	1.7044	1.6339	-70.5	1.6759	1.6759	0	1.7305	1.7058	-24.7	1.7493	1.7097	-39.6	1.8369	1.8345	-2.4	1.963	1.8811	-81.9	2.0004	1.9476	-52.8	2.1476	2.0922	-55.4
		12.6667		1.7391	1.7445	5.4	1.6771	1.7151	38	1.6496	1.6658	16.2	1.7223	1.6789	-43.4	1.7151	1.6333	-81.8	1.6727	1.6728	0.1	1.7299	1.7162	-13.7	1.7533	1.7173	-36	1.8343	1.8248	-9.5	1.9643	1.8767	-87.6	1.9941	1.9525	-41.6	2.1404	2.086	-54.4
		12.7333		1.7321	1.7455	13.4	1.6808	1.7163	35.5	1.6562	1.6589	2.7	1.7082	1.676	-32.2	1.7079	1.6341	-73.8	1.6738	1.6717	-2.1	1.7288	1.7151	-13.7	1.7587	1.7113	-47.4	1.8281	1.8325	4.4	1.9588	1.8797	-79.1	2.0062	1.9488	-57.4	2.1414	2.0958	-45.6
		12.8		1.7335	1.7388	5.3	1.6805	1.7189	38.4	1.6566	1.6654	8.8	1.7193	1.6736	-45.7	1.7069	1.6352	-71.7	1.6741	1.673	-1.1	1.7368	1.7009	-35.9	1.7568	1.7105	-46.3	1.8295	1.8258	-3.7	1.9616	1.8805	-81.1	2.0048	1.9395	-65.3	2.1386	2.09	-48.6
		12.8667		1.7336	1.7415	7.9	1.6791	1.716	36.9	1.6636	1.6609	-2.7	1.7223	1.6754	-46.9	1.7038	1.6372	-66.6	1.6752	1.6714	-3.8	1.7251	1.7007	-24.4	1.7489	1.7111	-37.8	1.8253	1.8252	-0.1	1.9678	1.8959	-71.9	2.0133	1.9432	-70.1	2.142	2.0868	-55.2
		12.9333		1.7314	1.7409	9.5	1.6761	1.7129	36.8	1.6539	1.6535	-0.4	1.7153	1.6775	-37.8	1.7073	1.6307	-76.6	1.6801	1.6704	-9.7	1.7381	1.7085	-29.6	1.753	1.713	-40	1.837	1.8219	-15.1	1.9559	1.8779	-78	2.0011	1.9428	-58.3	2.1538	2.0836	-70.2
		13		1.7332	1.7429	9.7	1.6758	1.7102	34.4	1.6618	1.6589	-2.9	1.712	1.6704	-41.6	1.703	1.6287	-74.3	1.6696	1.6763	6.7	1.7306	1.712	-18.6	1.7479	1.7204	-27.5	1.8345	1.8221	-12.4	1.9677	1.881	-86.7	2.0032	1.9409	-62.3	2.1418	2.0982	-43.6
		13.0667		1.7356	1.7374	1.8	1.6744	1.7148	40.4	1.6474	1.6595	12.1	1.7184	1.6805	-37.9	1.6974	1.634	-63.4	1.6704	1.6767	6.3	1.7359	1.7054	-30.5	1.7598	1.7058	-54	1.8347	1.8345	-0.2	1.9615	1.8797	-81.8	2.0164	1.9403	-76.1	2.1411	2.0831	-58
		13.1333		1.7329	1.7388	5.9	1.6779	1.7253	47.4	1.6543	1.6558	1.5	1.7104	1.6728	-37.6	1.7056	1.6272	-78.4	1.6758	1.6726	-3.2	1.728	1.7053	-22.7	1.7582	1.7021	-56.1	1.8274	1.8212	-6.2	1.9694	1.8856	-83.8	1.9982	1.9314	-66.8	2.1324	2.087	-45.4
		13.2		1.7365	1.7408	4.3	1.6747	1.7167	42	1.657	1.6566	-0.4	1.7133	1.6791	-34.2	1.7036	1.6369	-66.7	1.6778	1.6689	-8.9	1.7315	1.6974	-34.1	1.7499	1.7119	-38	1.8269	1.8253	-1.6	1.9694	1.8777	-91.7	1.9998	1.943	-56.8	2.1281	2.0877	-40.4
		13.2667		1.7326	1.7446	12	1.6724	1.7166	44.2	1.6477	1.6536	5.9	1.7193	1.6733	-46	1.7024	1.6272	-75.2	1.6721	1.6745	2.4	1.7285	1.709	-19.5	1.7482	1.7078	-40.4	1.834	1.8293	-4.7	1.9634	1.8715	-91.9	2.0053	1.9428	-62.5	2.1423	2.0898	-52.5
		13.3333		1.7339	1.7335	-0.4	1.6838	1.7143	30.5	1.6527	1.6528	0.1	1.7229	1.6711	-51.8	1.702	1.6315	-70.5	1.6684	1.6598	-8.6	1.7293	1.6989	-30.4	1.7502	1.707	-43.2	1.8355	1.8178	-17.7	1.9592	1.8771	-82.1	2.0004	1.9393	-61.1	2.144	2.0964	-47.6
		13.4		1.7376	1.7379	0.3	1.6838	1.7136	29.8	1.654	1.6465	-7.5	1.7127	1.6679	-44.8	1.7026	1.6273	-75.3	1.6721	1.6692	-2.9	1.7317	1.7123	-19.4	1.7589	1.709	-49.9	1.8374	1.8194	-18	1.9759	1.8681	-107.8	2.0088	1.9433	-65.5	2.133	2.0816	-51.4
		13.4667		1.738	1.736	-2	1.6729	1.7106	37.7	1.6578	1.6515	-6.3	1.7244	1.6695	-54.9	1.7067	1.6269	-79.8	1.6736	1.6636	-10	1.7265	1.7031	-23.4	1.753	1.7132	-39.8	1.8229	1.8344	11.5	1.9669	1.8767	-90.2	2.0007	1.9446	-56.1	2.1387	2.0867	-52
		13.5333		1.7345	1.7374	2.9	1.6737	1.7113	37.6	1.6459	1.6505	4.6	1.7123	1.6705	-41.8	1.7028	1.6393	-63.5	1.6753	1.6692	-6.1	1.7278	1.7017	-26.1	1.75	1.7076	-42.4	1.8237	1.8205	-3.2	1.9675	1.8809	-86.6	2.003	1.9333	-69.7	2.1394	2.088	-51.4
		13.6		1.7273	1.7311	3.8	1.6773	1.7087	31.4	1.6649	1.6501	-14.8	1.7189	1.6675	-51.4	1.7093	1.6256	-83.7	1.6797	1.6671	-12.6	1.7217	1.7	-21.7	1.7591	1.7048	-54.3	1.8304	1.8237	-6.7	1.9656	1.8712	-94.4	2.0046	1.9457	-58.9	2.135	2.0935	-41.5
		13.6667		1.7281	1.7322	4.1	1.6748	1.704	29.2	1.655	1.6462	-8.8	1.7152	1.6744	-40.8	1.7012	1.6302	-71	1.6767	1.6606	-16.1	1.7225	1.6938	-28.7	1.7622	1.7065	-55.7	1.8432	1.8262	-17	1.9666	1.881	-85.6	2.0165	1.9387	-77.8	2.1326	2.0871	-45.5
		13.7333		1.7408	1.7406	-0.2	1.6807	1.7071	26.4	1.661	1.6468	-14.2	1.7219	1.6733	-48.6	1.7021	1.6247	-77.4	1.6756	1.6618	-13.8	1.7367	1.6975	-39.2	1.7556	1.7131	-42.5	1.8356	1.8266	-9	1.9654	1.8691	-96.3	1.9999	1.9394	-60.5	2.1411	2.1	-41.1
		13.8		1.7364	1.737	0.6	1.6735	1.7141	40.6	1.6575	1.6547	-2.8	1.7189	1.673	-45.9	1.7076	1.6231	-84.5	1.6738	1.6668	-7	1.7358	1.6986	-37.2	1.7541	1.7122	-41.9	1.8338	1.825	-8.8	1.9668	1.873	-93.8	2.001	1.9369	-64.1	2.1364	2.0852	-51.2
		13.8667		1.7325	1.7371	4.6	1.6757	1.7139	38.2	1.661	1.6471	-13.9	1.7204	1.6663	-54.1	1.7014	1.6299	-71.5	1.6703	1.6584	-11.9	1.7302	1.6926	-37.6	1.7473	1.7067	-40.6	1.8308	1.816	-14.8	1.9692	1.8686	-100.6	2.006	1.9378	-68.2	2.1319	2.0854	-46.5
		13.9333		1.7372	1.7301	-7.1	1.6721	1.6998	27.7	1.6525	1.6523	-0.2	1.7124	1.664	-48.4	1.7022	1.6279	-74.3	1.6723	1.6611	-11.2	1.7266	1.6917	-34.9	1.7507	1.7027	-48	1.8313	1.8175	-13.8	1.961	1.8775	-83.5	2.0007	1.9352	-65.5	2.1358	2.0922	-43.6
		14		1.7386	1.7342	-4.4	1.6814	1.7065	25.1	1.6643	1.6477	-16.6	1.7159	1.6735	-42.4	1.7028	1.6211	-81.7	1.6715	1.6644	-7.1	1.7329	1.6941	-38.8	1.7582	1.7083	-49.9	1.8363	1.8172	-19.1	1.9666	1.8798	-86.8	2.0074	1.9393	-68.1	2.1388	2.0832	-55.6
		14.0667		1.7353	1.7262	-9.1	1.6677	1.7057	38	1.6568	1.6422	-14.6	1.7122	1.6648	-47.4	1.7041	1.6219	-82.2	1.6791	1.6603	-18.8	1.7258	1.7016	-24.2	1.7508	1.7013	-49.5	1.8302	1.8151	-15.1	1.9598	1.8741	-85.7	2.0113	1.9311	-80.2	2.1403	2.0908	-49.5
		14.1333		1.742	1.739	-3	1.68	1.7059	25.9	1.6531	1.651	-2.1	1.7208	1.6616	-59.2	1.7032	1.6241	-79.1	1.6669	1.6658	-1.1	1.7271	1.7006	-26.5	1.7482	1.7052	-43	1.8267	1.8226	-4.1	1.9609	1.8737	-87.2	1.9969	1.9369	-60	2.1358	2.0936	-42.2
		14.2		1.7418	1.7259	-15.9	1.6854	1.7028	17.4	1.6525	1.6503	-2.2	1.7126	1.6649	-47.7	1.7039	1.6303	-73.6	1.674	1.6579	-16.1	1.7278	1.7027	-25.1	1.7476	1.6986	-49	1.834	1.8271	-6.9	1.9711	1.8746	-96.5	2.0007	1.935	-65.7	2.1381	2.0881	-50
		14.2667		1.7342	1.7336	-0.6	1.683	1.702	19	1.6549	1.6486	-6.3	1.7214	1.6707	-50.7	1.7082	1.6222	-86	1.6744	1.6601	-14.3	1.7334	1.6969	-36.5	1.7467	1.7072	-39.5	1.8315	1.8123	-19.2	1.9619	1.872	-89.9	1.9992	1.9474	-51.8	2.1572	2.0805	-76.7
		14.3333		1.7429	1.7311	-11.8	1.6813	1.7054	24.1	1.6503	1.6448	-5.5	1.7122	1.6659	-46.3	1.7024	1.6259	-76.5	1.6754	1.6636	-11.8	1.7312	1.7008	-30.4	1.7546	1.7003	-54.3	1.8409	1.8158	-25.1	1.9687	1.8809	-87.8	2.0025	1.9383	-64.2	2.1405	2.0897	-50.8
		14.4		1.7316	1.7265	-5.1	1.6853	1.7033	18	1.6542	1.6508	-3.4	1.716	1.6642	-51.8	1.7011	1.6309	-70.2	1.6737	1.6615	-12.2	1.7341	1.6965	-37.6	1.7458	1.704	-41.8	1.8278	1.824	-3.8	1.9682	1.8685	-99.7	2.0096	1.9325	-77.1	2.1455	2.0865	-59
		14.4667		1.7336	1.7313	-2.3	1.6762	1.7061	29.9	1.6482	1.6491	0.9	1.7175	1.6607	-56.8	1.7153	1.6234	-91.9	1.6748	1.6708	-4	1.7318	1.699	-32.8	1.7587	1.7045	-54.2	1.8262	1.8144	-11.8	1.9605	1.8696	-90.9	2.0031	1.9363	-66.8	2.1337	2.0842	-49.5
		14.5333		1.73	1.7215	-8.5	1.6791	1.7065	27.4	1.6531	1.6412	-11.9	1.7206	1.6603	-60.3	1.6968	1.621	-75.8	1.6711	1.6573	-13.8	1.7378	1.6893	-48.5	1.7538	1.6989	-54.9	1.83	1.8129	-17.1	1.9657	1.867	-98.7	1.9979	1.9303	-67.6	2.1499	2.0834	-66.5
		14.6		1.7343	1.7285	-5.8	1.677	1.7087	31.7	1.654	1.6406	-13.4	1.7173	1.6633	-54	1.7064	1.6272	-79.2	1.6888	1.6628	-26	1.7349	1.6998	-35.1	1.7413	1.7068	-34.5	1.8358	1.825	-10.8	1.9663	1.8786	-87.7	1.9999	1.9317	-68.2	2.1363	2.0917	-44.6
		14.6667		1.7349	1.7291	-5.8	1.6826	1.6994	16.8	1.6567	1.6497	-7	1.7118	1.67	-41.8	1.7059	1.6217	-84.2	1.6758	1.6562	-19.6	1.7301	1.6881	-42	1.7491	1.7085	-40.6	1.828	1.82	-8	1.9662	1.8652	-101	2.0063	1.9375	-68.8	2.1449	2.086	-58.9
		14.7333		1.7284	1.7287	0.3	1.6729	1.7018	28.9	1.6545	1.646	-8.5	1.7154	1.6584	-57	1.702	1.6248	-77.2	1.6766	1.6562	-20.4	1.7333	1.6931	-40.2	1.7476	1.7074	-40.2	1.8309	1.8183	-12.6	1.9605	1.8841	-76.4	1.996	1.9277	-68.3	2.1409	2.0854	-55.5
		14.8		1.732	1.7266	-5.4	1.6869	1.7011	14.2	1.6458	1.6377	-8.1	1.7149	1.6738	-41.1	1.7028	1.6177	-85.1	1.6722	1.6631	-9.1	1.7367	1.6917	-45	1.7562	1.6956	-60.6	1.8287	1.823	-5.7	1.9668	1.8768	-90	1.9956	1.9314	-64.2	2.1347	2.0911	-43.6
		14.8667		1.7307	1.7214	-9.3	1.6781	1.6998	21.7	1.6546	1.6378	-16.8	1.7181	1.6567	-61.4	1.7024	1.6182	-84.2	1.6718	1.6587	-13.1	1.7295	1.6942	-35.3	1.748	1.7035	-44.5	1.8339	1.8124	-21.5	1.9594	1.8822	-77.2	2.0121	1.9386	-73.5	2.137	2.0889	-48.1
		14.9333		1.7368	1.7245	-12.3	1.6814	1.6979	16.5	1.6571	1.6438	-13.3	1.715	1.6598	-55.2	1.6984	1.6149	-83.5	1.668	1.6562	-11.8	1.7268	1.6921	-34.7	1.7502	1.6977	-52.5	1.8279	1.8114	-16.5	1.9659	1.8725	-93.4	2.0158	1.9251	-90.7	2.1421	2.0851	-57
		15		1.7311	1.7296	-1.5	1.6739	1.6929	19	1.6531	1.637	-16.1	1.717	1.6608	-56.2	1.7034	1.621	-82.4	1.6728	1.6643	-8.5	1.7304	1.694	-36.4	1.7469	1.7027	-44.2	1.8269	1.8145	-12.4	1.9637	1.8752	-88.5	2.0038	1.9259	-77.9	2.1381	2.0871	-51
		15.0667		1.73	1.7222	-7.8	1.6818	1.6905	8.7	1.6629	1.6508	-12.1	1.7134	1.6635	-49.9	1.7017	1.6228	-78.9	1.6787	1.6625	-16.2	1.7343	1.6919	-42.4	1.7514	1.6971	-54.3	1.833	1.8153	-17.7	1.9759	1.8634	-112.5	1.9972	1.9336	-63.6	2.1382	2.0911	-47.1
		15.1333		1.737	1.7188	-18.2	1.6806	1.7031	22.5	1.656	1.6416	-14.4	1.7071	1.6519	-55.2	1.7055	1.6161	-89.4	1.6712	1.6584	-12.8	1.7287	1.6971	-31.6	1.7518	1.6978	-54	1.8292	1.8121	-17.1	1.956	1.8729	-83.1	2.007	1.9314	-75.6	2.1462	2.1	-46.2
		15.2		1.7314	1.7167	-14.7	1.6718	1.6937	21.9	1.6553	1.6455	-9.8	1.7137	1.6623	-51.4	1.7034	1.616	-87.4	1.6739	1.6571	-16.8	1.733	1.6863	-46.7	1.7474	1.6949	-52.5	1.8336	1.8164	-17.2	1.9628	1.8624	-100.4	2.002	1.932	-70	2.1334	2.0937	-39.7
		15.2667		1.7315	1.7243	-7.2	1.6848	1.7012	16.4	1.6637	1.6405	-23.2	1.7161	1.6655	-50.6	1.6955	1.62	-75.5	1.6764	1.6554	-21	1.7343	1.6866	-47.7	1.7436	1.7027	-40.9	1.8347	1.8243	-10.4	1.968	1.8734	-94.6	1.9978	1.9351	-62.7	2.1377	2.0849	-52.8
		15.3333		1.7452	1.7176	-27.6	1.672	1.6911	19.1	1.653	1.6435	-9.5	1.714	1.6517	-62.3	1.7034	1.6178	-85.6	1.6722	1.6566	-15.6	1.7309	1.6974	-33.5	1.7482	1.6953	-52.9	1.8327	1.82	-12.7	1.9612	1.8644	-96.8	2	1.9307	-69.3	2.1338	2.0845	-49.3
		15.4		1.7319	1.7108	-21.1	1.6785	1.6967	18.2	1.6682	1.634	-34.2	1.7151	1.6527	-62.4	1.7066	1.614	-92.6	1.6768	1.6486	-28.2	1.7308	1.6905	-40.3	1.7552	1.6994	-55.8	1.8325	1.8141	-18.4	1.9619	1.8737	-88.2	1.9998	1.9284	-71.4	2.1436	2.0895	-54.1
		15.4667		1.7364	1.7116	-24.8	1.6892	1.695	5.8	1.6514	1.6355	-15.9	1.7161	1.6591	-57	1.7053	1.6263	-79	1.6772	1.6551	-22.1	1.7327	1.6944	-38.3	1.7486	1.6932	-55.4	1.8411	1.8146	-26.5	1.9662	1.8681	-98.1	1.9997	1.9304	-69.3	2.1437	2.0862	-57.5
		15.5333		1.7268	1.7143	-12.5	1.6793	1.6951	15.8	1.6561	1.6387	-17.4	1.716	1.6588	-57.2	1.7049	1.6155	-89.4	1.6753	1.6483	-27	1.7257	1.6867	-39	1.7565	1.6974	-59.1	1.8381	1.8148	-23.3	1.9668	1.8699	-96.9	2.0015	1.9293	-72.2	2.1323	2.0878	-44.5
		15.6		1.7317	1.721	-10.7	1.6773	1.6911	13.8	1.6529	1.6462	-6.7	1.714	1.6615	-52.5	1.7058	1.6136	-92.2	1.6744	1.6486	-25.8	1.7323	1.7003	-32	1.748	1.6947	-53.3	1.8243	1.8136	-10.7	1.9669	1.8627	-104.2	1.9993	1.9436	-55.7	2.1375	2.0883	-49.2
		15.6667		1.7318	1.7157	-16.1	1.688	1.6957	7.7	1.655	1.6349	-20.1	1.715	1.6548	-60.2	1.7011	1.6151	-86	1.6758	1.6514	-24.4	1.7371	1.6885	-48.6	1.7515	1.7003	-51.2	1.8366	1.8127	-23.9	1.9609	1.8731	-87.8	1.9988	1.9298	-69	2.1393	2.0812	-58.1
		15.7333		1.7293	1.7157	-13.6	1.671	1.693	22	1.6703	1.6374	-32.9	1.7191	1.6571	-62	1.6998	1.6095	-90.3	1.6699	1.6548	-15.1	1.7333	1.6822	-51.1	1.7544	1.6987	-55.7	1.8366	1.8103	-26.3	1.9679	1.8755	-92.4	1.9969	1.9343	-62.6	2.138	2.0909	-47.1
		15.8		1.7368	1.7156	-21.2	1.6733	1.6903	17	1.6484	1.6372	-11.2	1.7136	1.65	-63.6	1.7017	1.6166	-85.1	1.669	1.652	-17	1.7273	1.6892	-38.1	1.7553	1.6958	-59.5	1.8314	1.8144	-17	1.9635	1.8748	-88.7	1.9946	1.9295	-65.1	2.1404	2.0786	-61.8
		15.8667		1.7326	1.714	-18.6	1.6809	1.7024	21.5	1.6617	1.6427	-19	1.7146	1.6495	-65.1	1.7016	1.6092	-92.4	1.6736	1.6522	-21.4	1.7291	1.6885	-40.6	1.7507	1.6977	-53	1.827	1.8225	-4.5	1.9577	1.8693	-88.4	1.9913	1.9337	-57.6	2.1318	2.0751	-56.7
		15.9333		1.7298	1.7207	-9.1	1.6815	1.6951	13.6	1.6519	1.6442	-7.7	1.7229	1.6534	-69.5	1.7007	1.6061	-94.6	1.6697	1.6484	-21.3	1.7341	1.6862	-47.9	1.7521	1.6959	-56.2	1.8244	1.8148	-9.6	1.9593	1.8682	-91.1	1.9981	1.9311	-67	2.1318	2.084	-47.8
		16		1.7317	1.7198	-11.9	1.683	1.6811	-1.9	1.6558	1.639	-16.8	1.7224	1.6524	-70	1.7105	1.6092	-101.3	1.676	1.6485	-27.5	1.7309	1.6835	-47.4	1.7537	1.6911	-62.6	1.837	1.8119	-25.1	1.9639	1.8774	-86.5	1.9982	1.9335	-64.7	2.1471	2.0833	-63.8
		16.0667		1.732	1.7098	-22.2	1.6712	1.6864	15.2	1.6501	1.6315	-18.6	1.7149	1.6475	-67.4	1.7024	1.6187	-83.7	1.6733	1.6465	-26.8	1.7338	1.6853	-48.5	1.7502	1.6952	-55	1.8314	1.8105	-20.9	1.96	1.8634	-96.6	1.9999	1.9302	-69.7	2.1403	2.0789	-61.4
		16.1333		1.736	1.712	-24	1.6779	1.692	14.1	1.6549	1.6363	-18.6	1.7095	1.6551	-54.4	1.7088	1.6143	-94.5	1.6756	1.645	-30.6	1.7313	1.6869	-44.4	1.755	1.7015	-53.5	1.8367	1.822	-14.7	1.9636	1.8671	-96.5	2.0089	1.9305	-78.4	2.135	2.0736	-61.4
		16.2		1.7343	1.7061	-28.2	1.6766	1.6904	13.8	1.6569	1.6261	-30.8	1.71	1.648	-62	1.7093	1.6151	-94.2	1.6749	1.6478	-27.1	1.7289	1.6861	-42.8	1.7575	1.6918	-65.7	1.8393	1.8143	-25	1.9609	1.8736	-87.3	1.9936	1.9295	-64.1	2.1267	2.0813	-45.4
		16.2667		1.7307	1.7089	-21.8	1.6776	1.6878	10.2	1.6486	1.6353	-13.3	1.727	1.6504	-76.6	1.7146	1.6034	-111.2	1.666	1.6503	-15.7	1.7258	1.6901	-35.7	1.7524	1.6933	-59.1	1.8281	1.8103	-17.8	1.9648	1.872	-92.8	2.0081	1.9331	-75	2.1402	2.0845	-55.7
		16.3333		1.7372	1.707	-30.2	1.6837	1.6848	1.1	1.6516	1.627	-24.6	1.7126	1.6492	-63.4	1.7119	1.612	-99.9	1.6748	1.6505	-24.3	1.7352	1.6865	-48.7	1.75	1.6907	-59.3	1.8318	1.8071	-24.7	1.9676	1.8723	-95.3	2.0008	1.9359	-64.9	2.1411	2.0905	-50.6
		16.4		1.7262	1.7076	-18.6	1.6745	1.6854	10.9	1.6491	1.6288	-20.3	1.7146	1.6511	-63.5	1.7113	1.6123	-99	1.6702	1.6524	-17.8	1.7365	1.6837	-52.8	1.7478	1.6932	-54.6	1.8342	1.8104	-23.8	1.9606	1.8741	-86.5	1.9976	1.9325	-65.1	2.1361	2.0808	-55.3
		16.4667		1.728	1.7134	-14.6	1.6797	1.6868	7.1	1.6489	1.6339	-15	1.717	1.6466	-70.4	1.7022	1.6074	-94.8	1.6729	1.6471	-25.8	1.7325	1.6857	-46.8	1.7485	1.6916	-56.9	1.8359	1.8152	-20.7	1.9632	1.867	-96.2	2.0021	1.9332	-68.9	2.1442	2.0816	-62.6
		16.5333		1.7321	1.716	-16.1	1.6766	1.6884	11.8	1.6598	1.6352	-24.6	1.7159	1.6488	-67.1	1.7001	1.62	-80.1	1.6769	1.6412	-35.7	1.7248	1.6863	-38.5	1.7549	1.6921	-62.8	1.8309	1.8084	-22.5	1.9696	1.8671	-102.5	2.007	1.9261	-80.9	2.1325	2.0962	-36.3
		16.6		1.7335	1.6989	-34.6	1.6846	1.6833	-1.3	1.6548	1.6322	-22.6	1.7187	1.6448	-73.9	1.6968	1.5982	-98.6	1.6687	1.6448	-23.9	1.7337	1.6807	-53	1.7559	1.6877	-68.2	1.8357	1.8069	-28.8	1.9631	1.863	-100.1	1.9927	1.9318	-60.9	2.1397	2.0894	-50.3
		16.6667		1.7281	1.7169	-11.2	1.6705	1.6885	18	1.6614	1.6289	-32.5	1.7163	1.651	-65.3	1.7	1.615	-85	1.6755	1.6488	-26.7	1.7271	1.6803	-46.8	1.7519	1.698	-53.9	1.8234	1.8123	-11.1	1.9537	1.8661	-87.6	2.0058	1.9332	-72.6	2.1513	2.0792	-72.1
		16.7333		1.7368	1.7073	-29.5	1.6782	1.6785	0.3	1.6489	1.6229	-26	1.7106	1.658	-52.6	1.6987	1.6046	-94.1	1.674	1.6409	-33.1	1.7357	1.6794	-56.3	1.7531	1.682	-71.1	1.8287	1.8085	-20.2	1.967	1.8692	-97.8	1.9981	1.9271	-71	2.1358	2.0856	-50.2
		16.8		1.7358	1.7042	-31.6	1.6784	1.6845	6.1	1.6547	1.6223	-32.4	1.7067	1.6494	-57.3	1.7026	1.6032	-99.4	1.6663	1.6378	-28.5	1.7413	1.674	-67.3	1.7511	1.6871	-64	1.827	1.8065	-20.5	1.9557	1.8734	-82.3	2.0008	1.9353	-65.5	2.1398	2.0814	-58.4
		16.8667		1.7298	1.7124	-17.4	1.6754	1.6821	6.7	1.6615	1.6236	-37.9	1.7093	1.6519	-57.4	1.7052	1.6044	-100.8	1.6722	1.6468	-25.4	1.734	1.6747	-59.3	1.7528	1.695	-57.8	1.8268	1.8066	-20.2	1.9694	1.8622	-107.2	1.9981	1.9229	-75.2	2.1412	2.0834	-57.8
		16.9333		1.7287	1.7162	-12.5	1.6819	1.6769	-5	1.651	1.6293	-21.7	1.7167	1.6436	-73.1	1.7	1.6044	-95.6	1.6797	1.6453	-34.4	1.7217	1.6766	-45.1	1.7503	1.6913	-59	1.83	1.8095	-20.5	1.96	1.8694	-90.6	1.9956	1.925	-70.6	2.1243	2.0827	-41.6
		17		1.7337	1.7102	-23.5	1.673	1.6838	10.8	1.6463	1.6298	-16.5	1.7143	1.6509	-63.4	1.7068	1.6051	-101.7	1.6708	1.6509	-19.9	1.7387	1.6797	-59	1.754	1.6943	-59.7	1.8206	1.8127	-7.9	1.9503	1.8786	-71.7	1.9953	1.9294	-65.9	2.1347	2.0748	-59.9
		17.0667		1.7318	1.7092	-22.6	1.6763	1.6833	7	1.6598	1.6243	-35.5	1.7167	1.6405	-76.2	1.7089	1.6013	-107.6	1.67	1.6389	-31.1	1.7243	1.687	-37.3	1.7637	1.6932	-70.5	1.831	1.8109	-20.1	1.9647	1.8645	-100.2	2.0068	1.9243	-82.5	2.132	2.0816	-50.4
		17.1333		1.7357	1.7045	-31.2	1.6787	1.6849	6.2	1.6549	1.6253	-29.6	1.7121	1.6444	-67.7	1.6988	1.6052	-93.6	1.6673	1.6469	-20.4	1.7257	1.6793	-46.4	1.7549	1.6902	-64.7	1.8304	1.8098	-20.6	1.9627	1.8647	-98	2.0029	1.9285	-74.4	2.1408	2.0747	-66.1
		17.2		1.7289	1.6947	-34.2	1.676	1.6789	2.9	1.651	1.6251	-25.9	1.7175	1.6493	-68.2	1.6963	1.6088	-87.5	1.6701	1.6399	-30.2	1.726	1.6763	-49.7	1.7416	1.6997	-41.9	1.83	1.8137	-16.3	1.9677	1.8699	-97.8	2	1.9365	-63.5	2.1328	2.0705	-62.3
		17.2667		1.728	1.6996	-28.4	1.6677	1.6839	16.2	1.6561	1.6238	-32.3	1.7165	1.6439	-72.6	1.7017	1.6088	-92.9	1.678	1.6422	-35.8	1.7237	1.6834	-40.3	1.7455	1.6885	-57	1.8321	1.8083	-23.8	1.966	1.8706	-95.4	2.0054	1.9282	-77.2	2.1358	2.0799	-55.9
		17.3333		1.7374	1.7047	-32.7	1.6842	1.6746	-9.6	1.6528	1.6254	-27.4	1.7084	1.6372	-71.2	1.6966	1.6004	-96.2	1.6711	1.6468	-24.3	1.7322	1.6822	-50	1.7513	1.6893	-62	1.8284	1.8061	-22.3	1.9607	1.866	-94.7	2.0039	1.9301	-73.8	2.1385	2.079	-59.5
		17.4		1.7404	1.7066	-33.8	1.6767	1.6769	0.2	1.6568	1.6232	-33.6	1.7132	1.6449	-68.3	1.7028	1.598	-104.8	1.6725	1.6374	-35.1	1.7267	1.6796	-47.1	1.755	1.6919	-63.1	1.8348	1.8056	-29.2	1.9638	1.8644	-99.4	2.0135	1.9249	-88.6	2.1227	2.0791	-43.6
		17.4667		1.7301	1.7049	-25.2	1.6746	1.6758	1.2	1.6476	1.6181	-29.5	1.715	1.6417	-73.3	1.6994	1.6055	-93.9	1.6705	1.6386	-31.9	1.7224	1.6793	-43.1	1.7473	1.6915	-55.8	1.8368	1.7998	-37	1.9629	1.8652	-97.7	2.0054	1.9205	-84.9	2.1267	2.0836	-43.1
		17.5333		1.7318	1.7004	-31.4	1.6766	1.6779	1.3	1.6567	1.6152	-41.5	1.7186	1.6367	-81.9	1.7008	1.5983	-102.5	1.6695	1.6328	-36.7	1.7343	1.6829	-51.4	1.7547	1.6886	-66.1	1.8285	1.8037	-24.8	1.9599	1.8644	-95.5	1.9959	1.9295	-66.4	2.1345	2.0845	-50
		17.6		1.7302	1.6967	-33.5	1.6763	1.6757	-0.6	1.6462	1.6249	-21.3	1.7141	1.6404	-73.7	1.6984	1.5968	-101.6	1.6701	1.6365	-33.6	1.737	1.6687	-68.3	1.7568	1.6852	-71.6	1.828	1.8101	-17.9	1.9575	1.8658	-91.7	1.9906	1.9289	-61.7	2.1275	2.0785	-49
		17.6667		1.7232	1.7081	-15.1	1.6843	1.6835	-0.8	1.6513	1.6283	-23	1.7098	1.6446	-65.2	1.6975	1.6088	-88.7	1.6687	1.6375	-31.2	1.7263	1.6813	-45	1.7538	1.6855	-68.3	1.8352	1.8017	-33.5	1.9606	1.866	-94.6	1.9953	1.9235	-71.8	2.1295	2.075	-54.5
		17.7333		1.7337	1.7008	-32.9	1.674	1.678	4	1.6512	1.6212	-30	1.7104	1.6358	-74.6	1.7021	1.6012	-100.9	1.673	1.6334	-39.6	1.7305	1.6708	-59.7	1.7486	1.6922	-56.4	1.8351	1.8124	-22.7	1.9624	1.8567	-105.7	2.0123	1.9199	-92.4	2.1378	2.0831	-54.7
		17.8		1.7261	1.6974	-28.7	1.6744	1.6725	-1.9	1.6558	1.6212	-34.6	1.7146	1.6463	-68.3	1.701	1.6031	-97.9	1.67	1.6361	-33.9	1.7191	1.6734	-45.7	1.7477	1.6888	-58.9	1.8362	1.8068	-29.4	1.9555	1.8683	-87.2	2.0065	1.9231	-83.4	2.1338	2.0791	-54.7
		17.8667		1.7349	1.6897	-45.2	1.6796	1.6766	-3	1.649	1.6204	-28.6	1.7218	1.6459	-75.9	1.7051	1.5992	-105.9	1.678	1.6316	-46.4	1.7311	1.6714	-59.7	1.7521	1.6871	-65	1.8297	1.803	-26.7	1.969	1.8631	-105.9	1.9981	1.9246	-73.5	2.1309	2.0762	-54.7
		17.9333		1.731	1.7004	-30.6	1.6747	1.674	-0.7	1.6553	1.6247	-30.6	1.7139	1.6331	-80.8	1.7005	1.5974	-103.1	1.6726	1.6361	-36.5	1.7252	1.6681	-57.1	1.7531	1.701	-52.1	1.8271	1.8106	-16.5	1.9716	1.8595	-112.1	1.9963	1.927	-69.3	2.1365	2.0857	-50.8
		18		1.7377	1.7024	-35.3	1.677	1.6763	-0.7	1.6573	1.6234	-33.9	1.7115	1.6327	-78.8	1.702	1.5963	-105.7	1.6687	1.6343	-34.4	1.73	1.6708	-59.2	1.7489	1.6861	-62.8	1.828	1.8075	-20.5	1.9642	1.8565	-107.7	2.0076	1.929	-78.6	2.1367	2.0785	-58.2
		18.0667		1.7296	1.6875	-42.1	1.6815	1.6711	-10.4	1.6544	1.6168	-37.6	1.7095	1.6422	-67.3	1.7069	1.5926	-114.3	1.6749	1.6271	-47.8	1.7242	1.6714	-52.8	1.7509	1.6939	-57	1.83	1.8016	-28.4	1.9629	1.8676	-95.3	1.9951	1.9243	-70.8	2.1391	2.0803	-58.8
		18.1333		1.7318	1.6939	-37.9	1.6854	1.6666	-18.8	1.6518	1.614	-37.8	1.7179	1.6347	-83.2	1.7005	1.5992	-101.3	1.6662	1.6268	-39.4	1.733	1.6714	-61.6	1.753	1.6819	-71.1	1.8286	1.8027	-25.9	1.9565	1.8632	-93.3	1.9935	1.9207	-72.8	2.1366	2.0792	-57.4
		18.2		1.728	1.6874	-40.6	1.6954	1.6739	-21.5	1.6555	1.6168	-38.7	1.7175	1.6437	-73.8	1.7042	1.5982	-106	1.679	1.6278	-51.2	1.7277	1.6698	-57.9	1.7482	1.6841	-64.1	1.8277	1.8021	-25.6	1.958	1.8631	-94.9	1.999	1.9249	-74.1	2.1353	2.0744	-60.9
		18.2667		1.7385	1.7021	-36.4	1.6737	1.6674	-6.3	1.6525	1.6195	-33	1.7089	1.636	-72.9	1.7032	1.5962	-107	1.6766	1.6296	-47	1.7282	1.6707	-57.5	1.7487	1.6781	-70.6	1.8226	1.8031	-19.5	1.9619	1.8686	-93.3	1.9949	1.9271	-67.8	2.1394	2.0735	-65.9
		18.3333		1.738	1.6914	-46.6	1.678	1.6671	-10.9	1.6471	1.6142	-32.9	1.7146	1.634	-80.6	1.7	1.5957	-104.3	1.6662	1.6292	-37	1.7305	1.6696	-60.9	1.7509	1.6862	-64.7	1.8246	1.8061	-18.5	1.9668	1.8597	-107.1	1.9912	1.9266	-64.6	2.1248	2.0735	-51.3
		18.4		1.7245	1.6959	-28.6	1.6845	1.6722	-12.3	1.6552	1.6119	-43.3	1.7147	1.6378	-76.9	1.7051	1.5888	-116.3	1.6735	1.636	-37.5	1.7239	1.668	-55.9	1.7472	1.6802	-67	1.8233	1.8021	-21.2	1.9666	1.8558	-110.8	1.9983	1.9228	-75.5	2.1315	2.0759	-55.6
		18.4667		1.7228	1.6922	-30.6	1.6778	1.675	-2.8	1.6573	1.6187	-38.6	1.7231	1.6374	-85.7	1.7086	1.5919	-116.7	1.669	1.629	-40	1.7448	1.6643	-80.5	1.7564	1.6809	-75.5	1.8322	1.8006	-31.6	1.9547	1.8605	-94.2	1.9973	1.9223	-75	2.1401	2.0749	-65.2
		18.5333		1.7253	1.6911	-34.2	1.676	1.6708	-5.2	1.6456	1.6169	-28.7	1.7258	1.6313	-94.5	1.7127	1.5937	-119	1.6701	1.6337	-36.4	1.7314	1.6637	-67.7	1.7577	1.6792	-78.5	1.8375	1.7926	-44.9	1.9658	1.8625	-103.3	2.0003	1.9211	-79.2	2.1395	2.0751	-64.4
		18.6		1.7253	1.6903	-35	1.6746	1.6672	-7.4	1.6527	1.6113	-41.4	1.7163	1.636	-80.3	1.7011	1.5929	-108.2	1.6735	1.6283	-45.2	1.7339	1.6666	-67.3	1.7566	1.6769	-79.7	1.8292	1.7954	-33.8	1.9606	1.8625	-98.1	1.9932	1.92	-73.2	2.1424	2.0776	-64.8
		18.6667		1.7311	1.6859	-45.2	1.679	1.6639	-15.1	1.6523	1.6165	-35.8	1.7168	1.6326	-84.2	1.7037	1.5997	-104	1.6747	1.6412	-33.5	1.7274	1.6722	-55.2	1.7467	1.6822	-64.5	1.8338	1.7932	-40.6	1.9639	1.8523	-111.6	1.9886	1.9365	-52.1	2.1382	2.0696	-68.6
		18.7333		1.7366	1.6855	-51.1	1.6721	1.6797	7.6	1.6559	1.6108	-45.1	1.7139	1.6378	-76.1	1.6971	1.5906	-106.5	1.6753	1.6291	-46.2	1.7229	1.6691	-53.8	1.7549	1.6886	-66.3	1.831	1.7997	-31.3	1.9652	1.859	-106.2	1.9956	1.9179	-77.7	2.1238	2.0729	-50.9
		18.8		1.7301	1.6986	-31.5	1.6718	1.6676	-4.2	1.6554	1.6093	-46.1	1.7146	1.6357	-78.9	1.7106	1.5889	-121.7	1.6735	1.6231	-50.4	1.73	1.6643	-65.7	1.7462	1.6829	-63.3	1.8359	1.7956	-40.3	1.9557	1.8608	-94.9	2.0021	1.9239	-78.2	2.1342	2.0777	-56.5
		18.8667		1.7398	1.6845	-55.3	1.6751	1.6669	-8.2	1.6516	1.612	-39.6	1.7111	1.639	-72.1	1.7028	1.6006	-102.2	1.6699	1.6208	-49.1	1.7266	1.6743	-52.3	1.7531	1.6825	-70.6	1.8294	1.8036	-25.8	1.9587	1.8591	-99.6	1.9958	1.9149	-80.9	2.143	2.0706	-72.4
		18.9333		1.7317	1.6854	-46.3	1.6777	1.6636	-14.1	1.655	1.6146	-40.4	1.7132	1.6372	-76	1.704	1.5908	-113.2	1.6638	1.6259	-37.9	1.7261	1.6569	-69.2	1.7482	1.6815	-66.7	1.8252	1.8021	-23.1	1.9588	1.8652	-93.6	2.0029	1.9329	-70	2.1362	2.0774	-58.8
		19		1.7285	1.6845	-44	1.6779	1.6666	-11.3	1.651	1.6166	-34.4	1.7117	1.6349	-76.8	1.7038	1.5958	-108	1.6702	1.6218	-48.4	1.7288	1.6631	-65.7	1.7469	1.6808	-66.1	1.8302	1.8007	-29.5	1.963	1.862	-101	1.9943	1.9211	-73.2	2.1324	2.075	-57.4
		19.0667		1.7322	1.6915	-40.7	1.6745	1.6605	-14	1.6573	1.6224	-34.9	1.7151	1.6358	-79.3	1.7081	1.5873	-120.8	1.6688	1.625	-43.8	1.7295	1.6642	-65.3	1.7528	1.6768	-76	1.823	1.8007	-22.3	1.9663	1.8535	-112.8	1.9937	1.9182	-75.5	2.1276	2.0731	-54.5
		19.1333		1.7296	1.6799	-49.7	1.6774	1.6711	-6.3	1.6515	1.6037	-47.8	1.7137	1.6317	-82	1.7096	1.5918	-117.8	1.6699	1.6288	-41.1	1.7447	1.6646	-80.1	1.7534	1.6838	-69.6	1.8235	1.7969	-26.6	1.9546	1.8543	-100.3	1.9981	1.9201	-78	2.137	2.0794	-57.6
		19.2		1.7327	1.6842	-48.5	1.6798	1.6653	-14.5	1.6565	1.6148	-41.7	1.7075	1.6312	-76.3	1.703	1.5876	-115.4	1.677	1.6284	-48.6	1.7285	1.6679	-60.6	1.7483	1.6752	-73.1	1.8294	1.7983	-31.1	1.9709	1.8521	-118.8	2.0017	1.9139	-87.8	2.136	2.0804	-55.6
		19.2667		1.7267	1.6855	-41.2	1.6776	1.6656	-12	1.6507	1.608	-42.7	1.7157	1.626	-89.7	1.705	1.5917	-113.3	1.672	1.6254	-46.6	1.7279	1.6689	-59	1.7494	1.6819	-67.5	1.8264	1.7957	-30.7	1.9659	1.8526	-113.3	2.0017	1.9181	-83.6	2.1434	2.0707	-72.7
		19.3333		1.7348	1.6865	-48.3	1.6747	1.6699	-4.8	1.6509	1.6149	-36	1.7172	1.6301	-87.1	1.7019	1.5862	-115.7	1.6748	1.6302	-44.6	1.7269	1.6638	-63.1	1.7534	1.6823	-71.1	1.8217	1.7899	-31.8	1.9758	1.8619	-113.9	2.0012	1.9169	-84.3	2.1366	2.0738	-62.8
		19.4		1.7325	1.6804	-52.1	1.6728	1.6718	-1	1.6617	1.6183	-43.4	1.7237	1.6246	-99.1	1.7005	1.59	-110.5	1.667	1.6249	-42.1	1.7216	1.6629	-58.7	1.7545	1.6756	-78.9	1.838	1.8049	-33.1	1.9603	1.8586	-101.7	2	1.9215	-78.5	2.1384	2.0766	-61.8
		19.4667		1.7309	1.6803	-50.6	1.6689	1.664	-4.9	1.6467	1.615	-31.7	1.7172	1.628	-89.2	1.7021	1.5852	-116.9	1.6712	1.6241	-47.1	1.7291	1.6688	-60.3	1.7531	1.6745	-78.6	1.8205	1.798	-22.5	1.9678	1.8563	-111.5	1.9993	1.9228	-76.5	2.1304	2.0755	-54.9
		19.5333		1.7383	1.6792	-59.1	1.6748	1.6657	-9.1	1.6524	1.6031	-49.3	1.7089	1.6262	-82.7	1.703	1.588	-115	1.6695	1.6201	-49.4	1.728	1.6577	-70.3	1.751	1.674	-77	1.8281	1.796	-32.1	1.9547	1.8521	-102.6	1.9971	1.9225	-74.6	2.1324	2.074	-58.4
		19.6		1.7281	1.6758	-52.3	1.6771	1.6592	-17.9	1.654	1.6107	-43.3	1.7218	1.626	-95.8	1.7005	1.579	-121.5	1.6723	1.6192	-53.1	1.7231	1.6571	-66	1.7557	1.6767	-79	1.8319	1.8034	-28.5	1.9661	1.8518	-114.3	1.9945	1.9222	-72.3	2.1489	2.0729	-76
		19.6667		1.7341	1.6787	-55.4	1.6755	1.6678	-7.7	1.6498	1.604	-45.8	1.7125	1.6311	-81.4	1.7012	1.5846	-116.6	1.6639	1.6258	-38.1	1.7279	1.6562	-71.7	1.7456	1.6759	-69.7	1.8255	1.7983	-27.2	1.9618	1.8568	-105	2.0012	1.9223	-78.9	2.1362	2.0655	-70.7
		19.7333		1.7264	1.6744	-52	1.6728	1.6586	-14.2	1.6522	1.6069	-45.3	1.7114	1.6246	-86.8	1.7041	1.5818	-122.3	1.6669	1.6173	-49.6	1.7177	1.6645	-53.2	1.7526	1.6759	-76.7	1.8222	1.8	-22.2	1.9663	1.8506	-115.7	1.9976	1.9174	-80.2	2.1343	2.081	-53.3
		19.8		1.7242	1.6728	-51.4	1.6707	1.6608	-9.9	1.6476	1.6066	-41	1.7107	1.6222	-88.5	1.7006	1.5937	-106.9	1.6694	1.6166	-52.8	1.7327	1.6642	-68.5	1.7468	1.6727	-74.1	1.8271	1.7977	-29.4	1.9659	1.8552	-110.7	2	1.925	-75	2.1374	2.0792	-58.2
		19.8667		1.736	1.6759	-60.1	1.6771	1.6665	-10.6	1.6497	1.5975	-52.2	1.7225	1.6211	-101.4	1.7091	1.5876	-121.5	1.6714	1.6316	-39.8	1.7238	1.6577	-66.1	1.7515	1.6817	-69.8	1.8288	1.801	-27.8	1.9558	1.852	-103.8	1.9936	1.9108	-82.8	2.1298	2.0674	-62.4
		19.9333		1.7263	1.6838	-42.5	1.6843	1.6579	-26.4	1.6482	1.6068	-41.4	1.7198	1.6262	-93.6	1.7001	1.5817	-118.4	1.6679	1.6271	-40.8	1.7304	1.6527	-77.7	1.7506	1.6867	-63.9	1.8293	1.7936	-35.7	1.9402	1.8563	-83.9	2.0066	1.925	-81.6	2.1356	2.0871	-48.5
		20		1.7298	1.6714	-58.4	1.6745	1.6579	-16.6	1.6502	1.6065	-43.7	1.7133	1.6264	-86.9	1.6945	1.579	-115.5	1.6704	1.62	-50.4	1.7244	1.6561	-68.3	1.7518	1.6818	-70	1.8293	1.8038	-25.5	1.9677	1.8549	-112.8	1.9989	1.9245	-74.4	2.1331	2.0843	-48.8
		20.0667		1.7306	1.6721	-58.5	1.6749	1.6586	-16.3	1.6506	1.6041	-46.5	1.7162	1.6305	-85.7	1.6974	1.589	-108.4	1.6749	1.6185	-56.4	1.7314	1.652	-79.4	1.7465	1.6708	-75.7	1.8313	1.8017	-29.6	1.9532	1.8563	-96.9	1.9977	1.9225	-75.2	2.1287	2.0738	-54.9
		20.1333		1.7381	1.6747	-63.4	1.6737	1.6556	-18.1	1.6559	1.6032	-52.7	1.7173	1.632	-85.3	1.6985	1.5887	-109.8	1.6702	1.6195	-50.7	1.7293	1.6596	-69.7	1.7517	1.6624	-89.3	1.8335	1.7999	-33.6	1.9537	1.8511	-102.6	1.9918	1.9169	-74.9	2.1365	2.0692	-67.3
		20.2		1.7269	1.6708	-56.1	1.6748	1.6544	-20.4	1.6521	1.6069	-45.2	1.7151	1.619	-96.1	1.7055	1.5802	-125.3	1.6728	1.6175	-55.3	1.7245	1.6541	-70.4	1.7587	1.6746	-84.1	1.8254	1.7962	-29.2	1.9573	1.8509	-106.4	1.99	1.9212	-68.8	2.1395	2.0728	-66.7
		20.2667		1.7275	1.6706	-56.9	1.6784	1.653	-25.4	1.6487	1.5982	-50.5	1.7122	1.616	-96.2	1.7017	1.5827	-119	1.6753	1.6141	-61.2	1.7232	1.6585	-64.7	1.7537	1.6741	-79.6	1.827	1.7894	-37.6	1.9547	1.8553	-99.4	1.9915	1.9151	-76.4	2.1376	2.0692	-68.4
		20.3333		1.7341	1.6781	-56	1.6714	1.6539	-17.5	1.6537	1.5977	-56	1.7237	1.6205	-103.2	1.6994	1.5824	-117	1.6691	1.613	-56.1	1.7272	1.6591	-68.1	1.7561	1.6748	-81.3	1.8354	1.7978	-37.6	1.9618	1.8496	-112.2	1.9937	1.9162	-77.5	2.1316	2.0712	-60.4
		20.4		1.7418	1.6761	-65.7	1.6754	1.6546	-20.8	1.6542	1.5982	-56	1.7147	1.6222	-92.5	1.6994	1.5799	-119.5	1.6661	1.6182	-47.9	1.7319	1.6568	-75.1	1.7522	1.6769	-75.3	1.8198	1.7938	-26	1.9507	1.8634	-87.3	1.999	1.9228	-76.2	2.1289	2.0649	-64
		20.4667		1.7281	1.68	-48.1	1.6756	1.6506	-25	1.6509	1.5973	-53.6	1.7151	1.6224	-92.7	1.7062	1.5804	-125.8	1.6669	1.6156	-51.3	1.7267	1.6592	-67.5	1.7475	1.6711	-76.4	1.8264	1.7911	-35.3	1.9591	1.8533	-105.8	1.9952	1.9234	-71.8	2.1209	2.0722	-48.7
		20.5333		1.7251	1.673	-52.1	1.6724	1.653	-19.4	1.6559	1.6064	-49.5	1.7035	1.6223	-81.2	1.708	1.5837	-124.3	1.669	1.6165	-52.5	1.7287	1.6579	-70.8	1.7441	1.6717	-72.4	1.8292	1.7968	-32.4	1.9643	1.8565	-107.8	2.0029	1.9142	-88.7	2.1308	2.0658	-65
		20.6		1.7338	1.6705	-63.3	1.6724	1.6583	-14.1	1.6538	1.6025	-51.3	1.7132	1.616	-97.2	1.7134	1.578	-135.4	1.6674	1.6146	-52.8	1.7243	1.6608	-63.5	1.7477	1.6697	-78	1.8362	1.7881	-48.1	1.9607	1.8539	-106.8	1.9954	1.9089	-86.5	2.1245	2.0713	-53.2
		20.6667		1.7343	1.6711	-63.2	1.6762	1.6523	-23.9	1.6549	1.5993	-55.6	1.7189	1.6157	-103.2	1.7013	1.5802	-121.1	1.677	1.6131	-63.9	1.7331	1.6515	-81.6	1.7529	1.6703	-82.6	1.829	1.7922	-36.8	1.9576	1.8481	-109.5	1.9942	1.915	-79.2	2.1309	2.0717	-59.2
		20.7333		1.7328	1.664	-68.8	1.6713	1.6529	-18.4	1.6596	1.6057	-53.9	1.7197	1.6111	-108.6	1.7169	1.5841	-132.8	1.6658	1.6164	-49.4	1.7283	1.6454	-82.9	1.7523	1.6692	-83.1	1.8281	1.7914	-36.7	1.9718	1.8517	-120.1	1.9928	1.9236	-69.2	2.1318	2.0668	-65
		20.8		1.731	1.6656	-65.4	1.6841	1.655	-29.1	1.6543	1.595	-59.3	1.7151	1.6218	-93.3	1.7033	1.5809	-122.4	1.6709	1.6166	-54.3	1.7283	1.655	-73.3	1.7521	1.6797	-72.4	1.8234	1.7962	-27.2	1.9565	1.8532	-103.3	1.9928	1.9146	-78.2	2.1238	2.0679	-55.9
		20.8667		1.7283	1.6613	-67	1.6775	1.6548	-22.7	1.6534	1.5973	-56.1	1.7137	1.6115	-102.2	1.7004	1.5771	-123.3	1.6779	1.6112	-66.7	1.7237	1.6585	-65.2	1.7497	1.6656	-84.1	1.8302	1.794	-36.2	1.9682	1.8571	-111.1	1.9956	1.9195	-76.1	2.1342	2.0599	-74.3
		20.9333		1.7295	1.6686	-60.9	1.6815	1.6549	-26.6	1.652	1.603	-49	1.7124	1.6116	-100.8	1.7033	1.5769	-126.4	1.6748	1.6238	-51	1.7207	1.654	-66.7	1.7565	1.6701	-86.4	1.826	1.787	-39	1.9555	1.8612	-94.3	2	1.911	-89	2.1333	2.0729	-60.4
		21		1.7298	1.6721	-57.7	1.6754	1.6568	-18.6	1.6542	1.5946	-59.6	1.7094	1.6161	-93.3	1.6965	1.5767	-119.8	1.6683	1.6099	-58.4	1.7324	1.6506	-81.8	1.7476	1.668	-79.6	1.8337	1.7931	-40.6	1.9615	1.8616	-99.9	2.002	1.9159	-86.1	2.1408	2.0871	-53.7
		21.0667		1.7311	1.6721	-59	1.6759	1.6522	-23.7	1.6567	1.5973	-59.4	1.7204	1.6191	-101.3	1.7021	1.5736	-128.5	1.6691	1.6149	-54.2	1.7347	1.657	-77.7	1.7488	1.6699	-78.9	1.8251	1.7986	-26.5	1.9651	1.8509	-114.2	2.0066	1.9222	-84.4	2.131	2.0671	-63.9
		21.1333		1.7312	1.6716	-59.6	1.6869	1.6459	-41	1.6506	1.602	-48.6	1.7127	1.6192	-93.5	1.7042	1.5708	-133.4	1.6687	1.6131	-55.6	1.7236	1.654	-69.6	1.7468	1.6676	-79.2	1.825	1.7924	-32.6	1.964	1.8601	-103.9	1.9948	1.9158	-79	2.129	2.0711	-57.9
		21.2		1.7304	1.6638	-66.6	1.6787	1.6511	-27.6	1.6529	1.5979	-55	1.7276	1.6176	-110	1.7027	1.5747	-128	1.6652	1.6124	-52.8	1.7269	1.649	-77.9	1.7548	1.6707	-84.1	1.8248	1.7936	-31.2	1.963	1.8527	-110.3	1.9954	1.9255	-69.9	2.1396	2.0799	-59.7
		21.2667		1.7261	1.6725	-53.6	1.6688	1.6458	-23	1.6473	1.5918	-55.5	1.7237	1.6189	-104.8	1.702	1.5788	-123.2	1.6755	1.6079	-67.6	1.7242	1.6504	-73.8	1.7473	1.6645	-82.8	1.8251	1.8047	-20.4	1.9732	1.8504	-122.8	1.9964	1.9037	-92.7	2.1332	2.0727	-60.5
		21.3333		1.733	1.6681	-64.9	1.6755	1.6478	-27.7	1.6541	1.5892	-64.9	1.7179	1.6113	-106.6	1.6968	1.5766	-120.2	1.6762	1.6071	-69.1	1.7301	1.6568	-73.3	1.7411	1.6678	-73.3	1.8333	1.8039	-29.4	1.9684	1.8481	-120.3	1.9993	1.9161	-83.2	2.1336	2.0657	-67.9
		21.4		1.7326	1.661	-71.6	1.6775	1.6448	-32.7	1.6555	1.5874	-68.1	1.7137	1.6112	-102.5	1.7004	1.578	-122.4	1.6692	1.6154	-53.8	1.7293	1.6474	-81.9	1.748	1.6747	-73.3	1.8381	1.789	-49.1	1.9557	1.8563	-99.4	1.9954	1.9118	-83.6	2.1368	2.0743	-62.5
		21.4667		1.7279	1.6705	-57.4	1.6765	1.6489	-27.6	1.6477	1.5875	-60.2	1.717	1.619	-98	1.7037	1.5683	-135.4	1.6703	1.6059	-64.4	1.7224	1.6451	-77.3	1.7493	1.6737	-75.6	1.8293	1.7869	-42.4	1.9604	1.8518	-108.6	2.0067	1.9167	-90	2.1349	2.0664	-68.5
		21.5333		1.7297	1.6743	-55.4	1.6789	1.6507	-28.2	1.6596	1.5933	-66.3	1.722	1.6132	-108.8	1.6993	1.5766	-122.7	1.6686	1.609	-59.6	1.7267	1.6459	-80.8	1.752	1.6692	-82.8	1.8209	1.7865	-34.4	1.9589	1.8537	-105.2	1.9997	1.9187	-81	2.131	2.068	-63
		21.6		1.7321	1.6614	-70.7	1.6724	1.6421	-30.3	1.6541	1.5909	-63.2	1.7114	1.6121	-99.3	1.7155	1.5725	-143	1.6673	1.6107	-56.6	1.7289	1.6468	-82.1	1.7523	1.6651	-87.2	1.8279	1.7922	-35.7	1.965	1.8527	-112.3	1.9957	1.9149	-80.8	2.126	2.0705	-55.5
		21.6667		1.728	1.6667	-61.3	1.6703	1.646	-24.3	1.6456	1.5962	-49.4	1.713	1.6079	-105.1	1.7006	1.5681	-132.5	1.6669	1.6083	-58.6	1.7375	1.6305	-107	1.7539	1.6588	-95.1	1.835	1.7908	-44.2	1.9512	1.835	-116.2	2.0036	1.9175	-86.1	2.1405	2.0764	-64.1
		21.7333		1.7297	1.6648	-64.9	1.6723	1.6465	-25.8	1.6521	1.5973	-54.8	1.711	1.6053	-105.7	1.6995	1.5742	-125.3	1.6669	1.6037	-63.2	1.7284	1.6465	-81.9	1.7519	1.6694	-82.5	1.8214	1.7898	-31.6	1.9645	1.8479	-116.6	2.0061	1.909	-97.1	2.1299	2.0632	-66.7
		21.8		1.724	1.6618	-62.2	1.6759	1.6423	-33.6	1.6532	1.5902	-63	1.711	1.6124	-98.6	1.697	1.5744	-122.6	1.6769	1.6029	-74	1.7304	1.643	-87.4	1.7448	1.6699	-74.9	1.8257	1.7831	-42.6	1.9599	1.8493	-110.6	1.9932	1.9153	-77.9	2.139	2.0642	-74.8
		21.8667		1.7256	1.6539	-71.7	1.68	1.6424	-37.6	1.6546	1.5932	-61.4	1.7064	1.6089	-97.5	1.708	1.5741	-133.9	1.6719	1.6055	-66.4	1.7314	1.6431	-88.3	1.7608	1.6651	-95.7	1.8293	1.7906	-38.7	1.9643	1.8452	-119.1	2.0032	1.9221	-81.1	2.1262	2.0716	-54.6
		21.9333		1.7281	1.6586	-69.5	1.6784	1.6402	-38.2	1.6492	1.5946	-54.6	1.7186	1.6143	-104.3	1.7038	1.5806	-123.2	1.6715	1.6109	-60.6	1.7247	1.6456	-79.1	1.7488	1.6585	-90.3	1.8244	1.7905	-33.9	1.9601	1.8529	-107.2	2.0055	1.912	-93.5	2.1359	2.0747	-61.2
		22		1.7221	1.6571	-65	1.6765	1.6444	-32.1	1.6528	1.5923	-60.5	1.7098	1.6075	-102.3	1.7035	1.5647	-138.8	1.6741	1.6026	-71.5	1.7171	1.6476	-69.5	1.7489	1.6656	-83.3	1.832	1.7871	-44.9	1.9646	1.8482	-116.4	1.9977	1.9071	-90.6	2.1337	2.0681	-65.6
		22.0667		1.7341	1.6528	-81.3	1.6827	1.6365	-46.2	1.6557	1.5868	-68.9	1.7166	1.6071	-109.5	1.6987	1.5754	-123.3	1.6686	1.6038	-64.8	1.7229	1.643	-79.9	1.7439	1.6598	-84.1	1.8233	1.7877	-35.6	1.965	1.8523	-112.7	1.9982	1.9174	-80.8	2.1296	2.0686	-61
		22.1333		1.7308	1.6587	-72.1	1.6812	1.6417	-39.5	1.6461	1.5901	-56	1.7183	1.605	-113.3	1.7079	1.5703	-137.6	1.6655	1.5999	-65.6	1.7308	1.6477	-83.1	1.7431	1.67	-73.1	1.825	1.7898	-35.2	1.9604	1.8457	-114.7	1.9958	1.9078	-88	2.1273	2.0755	-51.8
		22.2		1.731	1.6533	-77.7	1.6717	1.6493	-22.4	1.6515	1.5896	-61.9	1.7166	1.6081	-108.5	1.7069	1.5712	-135.7	1.6644	1.6001	-64.3	1.7352	1.6461	-89.1	1.7543	1.6642	-90.1	1.8286	1.7917	-36.9	1.9647	1.8458	-118.9	1.9934	1.9019	-91.5	2.1324	2.0684	-64
		22.2667		1.7355	1.6612	-74.3	1.6784	1.6378	-40.6	1.6607	1.5818	-78.9	1.723	1.6045	-118.5	1.7003	1.5661	-134.2	1.6748	1.6042	-70.6	1.7315	1.6433	-88.2	1.7417	1.6531	-88.6	1.8251	1.7817	-43.4	1.9625	1.8518	-110.7	2.0005	1.9133	-87.2	2.1325	2.072	-60.5
		22.3333		1.7327	1.6562	-76.5	1.6766	1.6387	-37.9	1.6559	1.5917	-64.2	1.7156	1.6032	-112.4	1.7085	1.5638	-144.7	1.6699	1.6046	-65.3	1.7218	1.6418	-80	1.7517	1.6665	-85.2	1.8376	1.7864	-51.2	1.9681	1.8513	-116.8	2.0023	1.9194	-82.9	2.1338	2.0706	-63.2
		22.4		1.7249	1.6488	-76.1	1.6807	1.6395	-41.2	1.6541	1.5849	-69.2	1.7133	1.6082	-105.1	1.7008	1.5666	-134.2	1.678	1.6155	-62.5	1.721	1.6406	-80.4	1.7439	1.6628	-81.1	1.8256	1.7836	-42	1.9548	1.8414	-113.4	1.9943	1.9185	-75.8	2.1259	2.0677	-58.2
		22.4667		1.7302	1.6516	-78.6	1.6823	1.6411	-41.2	1.6519	1.5868	-65.1	1.7106	1.6039	-106.7	1.7005	1.5653	-135.2	1.6674	1.599	-68.4	1.729	1.6408	-88.2	1.7497	1.6718	-77.9	1.8284	1.7892	-39.2	1.9558	1.8409	-114.9	2.0029	1.9168	-86.1	2.1323	2.068	-64.3
		22.5333		1.7349	1.6529	-82	1.6761	1.6333	-42.8	1.6521	1.5837	-68.4	1.7057	1.6088	-96.9	1.7008	1.5713	-129.5	1.6677	1.6033	-64.4	1.72	1.6363	-83.7	1.7464	1.661	-85.4	1.8294	1.7809	-48.5	1.9729	1.8484	-124.5	2.0035	1.9096	-93.9	2.1341	2.0627	-71.4
		22.6		1.7253	1.6574	-67.9	1.6749	1.6343	-40.6	1.6499	1.5875	-62.4	1.7107	1.5984	-112.3	1.7001	1.5672	-132.9	1.6734	1.6023	-71.1	1.7328	1.641	-91.8	1.7546	1.6629	-91.7	1.8394	1.7923	-47.1	1.9673	1.8489	-118.4	1.9976	1.9155	-82.1	2.1331	2.0738	-59.3
		22.6667		1.731	1.6531	-77.9	1.6755	1.6386	-36.9	1.6484	1.5846	-63.8	1.7223	1.6119	-110.4	1.7084	1.5651	-143.3	1.6742	1.5974	-76.8	1.7206	1.636	-84.6	1.7542	1.6564	-97.8	1.8345	1.7886	-45.9	1.956	1.8552	-100.8	1.9916	1.9157	-75.9	2.1346	2.0646	-70
		22.7333		1.7334	1.6476	-85.8	1.6714	1.627	-44.4	1.6467	1.5837	-63	1.7211	1.6018	-119.3	1.7057	1.5706	-135.1	1.67	1.6078	-62.2	1.7296	1.6378	-91.8	1.7517	1.6704	-81.3	1.8398	1.7863	-53.5	1.9681	1.8515	-116.6	1.9964	1.913	-83.4	2.1363	2.0668	-69.5
		22.8		1.7339	1.6498	-84.1	1.6691	1.6388	-30.3	1.6603	1.5851	-75.2	1.7106	1.6061	-104.5	1.7005	1.5723	-128.2	1.6732	1.6016	-71.6	1.7231	1.6443	-78.8	1.748	1.6631	-84.9	1.8283	1.7839	-44.4	1.9678	1.8456	-122.2	1.9966	1.9113	-85.3	2.1325	2.0641	-68.4
		22.8667		1.722	1.6532	-68.8	1.6832	1.6433	-39.9	1.6519	1.5822	-69.7	1.7119	1.602	-109.9	1.7045	1.5652	-139.3	1.6733	1.5941	-79.2	1.7253	1.6358	-89.5	1.7416	1.657	-84.6	1.8352	1.7831	-52.1	1.9608	1.8532	-107.6	1.9916	1.9047	-86.9	2.1255	2.0744	-51.1
		22.9333		1.7284	1.6453	-83.1	1.6662	1.6327	-33.5	1.6484	1.5827	-65.7	1.7168	1.5972	-119.6	1.7058	1.5591	-146.7	1.6747	1.5966	-78.1	1.7301	1.6408	-89.3	1.7549	1.6648	-90.1	1.8299	1.7816	-48.3	1.9626	1.8494	-113.2	2.0101	1.9067	-103.4	2.1352	2.072	-63.2
		23		1.7328	1.6489	-83.9	1.6785	1.6405	-38	1.6567	1.5851	-71.6	1.7133	1.6018	-111.5	1.7002	1.5645	-135.7	1.6724	1.5991	-73.3	1.7246	1.6387	-85.9	1.7477	1.6589	-88.8	1.8303	1.7819	-48.4	1.9589	1.842	-116.9	1.9952	1.9071	-88.1	2.1225	2.0588	-63.7
		23.0667		1.7378	1.6526	-85.2	1.6699	1.6355	-34.4	1.6511	1.5788	-72.3	1.7128	1.6	-112.8	1.7016	1.567	-134.6	1.6719	1.6029	-69	1.7314	1.6427	-88.7	1.7475	1.6602	-87.3	1.8254	1.787	-38.4	1.9617	1.8484	-113.3	2.0086	1.917	-91.6	2.1291	2.0697	-59.4
		23.1333		1.732	1.6457	-86.3	1.6679	1.6305	-37.4	1.6535	1.585	-68.5	1.7092	1.5948	-114.4	1.6989	1.5653	-133.6	1.67	1.5987	-71.3	1.7249	1.6328	-92.1	1.7547	1.6688	-85.9	1.8289	1.7827	-46.2	1.9636	1.8501	-113.5	2.0036	1.9127	-90.9	2.1339	2.0685	-65.4
		23.2		1.7253	1.6493	-76	1.68	1.6338	-46.2	1.6525	1.5829	-69.6	1.72	1.5992	-120.8	1.6908	1.5593	-131.5	1.6637	1.606	-57.7	1.7275	1.6401	-87.4	1.7513	1.6628	-88.5	1.8356	1.7938	-41.8	1.9616	1.8395	-122.1	2.0031	1.9077	-95.4	2.1351	2.0763	-58.8
		23.2667		1.7329	1.6431	-89.8	1.6769	1.6362	-40.7	1.6499	1.5844	-65.5	1.7193	1.5995	-119.8	1.6989	1.5598	-139.1	1.6643	1.598	-66.3	1.7295	1.6359	-93.6	1.7456	1.6622	-83.4	1.8231	1.7887	-34.4	1.9676	1.8438	-123.8	1.9975	1.9062	-91.3	2.1405	2.0646	-75.9
		23.3333		1.7322	1.6457	-86.5	1.6751	1.6323	-42.8	1.648	1.5782	-69.8	1.7086	1.6051	-103.5	1.702	1.5623	-139.7	1.6668	1.5971	-69.7	1.724	1.6398	-84.2	1.7427	1.6574	-85.3	1.8283	1.7794	-48.9	1.9583	1.84	-118.3	2.0049	1.9045	-100.4	2.1326	2.0769	-55.7
		23.4		1.7273	1.6481	-79.2	1.6751	1.6317	-43.4	1.6593	1.5729	-86.4	1.7157	1.6002	-115.5	1.6992	1.5546	-144.6	1.6693	1.5904	-78.9	1.7289	1.6307	-98.2	1.7536	1.6691	-84.5	1.8336	1.7828	-50.8	1.9556	1.849	-106.6	1.9991	1.9185	-80.6	2.1247	2.068	-56.7
		23.4667		1.7288	1.642	-86.8	1.6711	1.6249	-46.2	1.6544	1.5802	-74.2	1.7063	1.6055	-100.8	1.698	1.562	-136	1.6628	1.5907	-72.1	1.7258	1.6322	-93.6	1.7435	1.6592	-84.3	1.8335	1.7841	-49.4	1.9623	1.8554	-106.9	2.0045	1.9077	-96.8	2.1294	2.0553	-74.1
		23.5333		1.7266	1.6443	-82.3	1.676	1.6321	-43.9	1.6607	1.577	-83.7	1.7134	1.5965	-116.9	1.6985	1.564	-134.5	1.6728	1.5984	-74.4	1.7195	1.6353	-84.2	1.7496	1.6586	-91	1.8294	1.7819	-47.5	1.9715	1.8479	-123.6	2.0079	1.9091	-98.8	2.1382	2.0513	-86.9
		23.6		1.7306	1.643	-87.6	1.6794	1.6381	-41.3	1.6611	1.5753	-85.8	1.7165	1.5952	-121.3	1.703	1.5538	-149.2	1.6662	1.5963	-69.9	1.7296	1.6306	-99	1.7504	1.6587	-91.7	1.82	1.7781	-41.9	1.9698	1.8519	-117.9	1.9991	1.9058	-93.3	2.1267	2.0771	-49.6
		23.6667		1.7203	1.6452	-75.1	1.6768	1.6308	-46	1.6564	1.5808	-75.6	1.7174	1.5912	-126.2	1.6993	1.5578	-141.5	1.6673	1.6026	-64.7	1.7321	1.6367	-95.4	1.7466	1.6608	-85.8	1.8275	1.7825	-45	1.9628	1.8394	-123.4	1.9985	1.9112	-87.3	2.136	2.0677	-68.3
		23.7333		1.7298	1.6414	-88.4	1.6703	1.6299	-40.4	1.6554	1.5763	-79.1	1.7115	1.5963	-115.2	1.7011	1.5576	-143.5	1.6745	1.5984	-76.1	1.7226	1.6335	-89.1	1.7522	1.6543	-97.9	1.8297	1.7792	-50.5	1.962	1.8429	-119.1	1.9956	1.9052	-90.4	2.1379	2.0589	-79
		23.8		1.7277	1.6425	-85.2	1.6726	1.6215	-51.1	1.6457	1.5824	-63.3	1.7144	1.5941	-120.3	1.7045	1.5529	-151.6	1.6666	1.5889	-77.7	1.7215	1.6369	-84.6	1.7471	1.6577	-89.4	1.8227	1.7757	-47	1.9659	1.8424	-123.5	1.9933	1.9031	-90.2	2.1396	2.0626	-77
		23.8667		1.725	1.6391	-85.9	1.6691	1.6186	-50.5	1.6506	1.5857	-64.9	1.7094	1.5909	-118.5	1.7011	1.5533	-147.8	1.6709	1.5925	-78.4	1.7283	1.6387	-89.6	1.749	1.6563	-92.7	1.8241	1.779	-45.1	1.9661	1.8405	-125.6	2.009	1.9112	-97.8	2.136	2.0629	-73.1
		23.9333		1.7273	1.6397	-87.6	1.6736	1.6251	-48.5	1.6563	1.573	-83.3	1.7031	1.5955	-107.6	1.6983	1.565	-133.3	1.6693	1.5956	-73.7	1.7208	1.6311	-89.7	1.7539	1.6598	-94.1	1.8288	1.7808	-48	1.963	1.8386	-124.4	1.9938	1.9139	-79.9	2.1361	2.0698	-66.3
		24		1.7297	1.6367	-93	1.6639	1.6245	-39.4	1.646	1.5743	-71.7	1.7244	1.5887	-135.7	1.6951	1.5546	-140.5	1.6709	1.591	-79.9	1.7205	1.631	-89.5	1.749	1.6535	-95.5	1.8238	1.7777	-46.1	1.9557	1.8385	-117.2	2.0008	1.9025	-98.3	2.1357	2.0697	-66
		24.0667		1.7284	1.6382	-90.2	1.6792	1.6369	-42.3	1.6571	1.5787	-78.4	1.7103	1.5905	-119.8	1.6972	1.5474	-149.8	1.669	1.5875	-81.5	1.7266	1.6283	-98.3	1.7491	1.6497	-99.4	1.8256	1.7837	-41.9	1.9582	1.8445	-113.7	1.9971	1.9147	-82.4	2.1314	2.0625	-68.9
		24.1333		1.7293	1.6411	-88.2	1.6699	1.6208	-49.1	1.6554	1.5799	-75.5	1.7094	1.5881	-121.3	1.6981	1.5574	-140.7	1.6698	1.5908	-79	1.7201	1.6322	-87.9	1.7496	1.6582	-91.4	1.8219	1.7814	-40.5	1.9613	1.8412	-120.1	2.0065	1.9126	-93.9	2.1242	2.0577	-66.5
		24.2		1.7319	1.6331	-98.8	1.675	1.6218	-53.2	1.6467	1.5755	-71.2	1.7164	1.5872	-129.2	1.6964	1.5602	-136.2	1.6665	1.5901	-76.4	1.7319	1.6327	-99.2	1.7523	1.6511	-101.2	1.8313	1.7769	-54.4	1.9618	1.837	-124.8	1.9946	1.9135	-81.1	2.1264	2.053	-73.4
		24.2667		1.7346	1.6374	-97.2	1.6665	1.6228	-43.7	1.6499	1.5738	-76.1	1.7212	1.5912	-130	1.7019	1.5519	-150	1.6773	1.5862	-91.1	1.731	1.6295	-101.5	1.7449	1.6582	-86.7	1.8191	1.7817	-37.4	1.9514	1.8355	-115.9	1.9969	1.9063	-90.6	2.1324	2.0672	-65.2
		24.3333		1.7315	1.6344	-97.1	1.6718	1.6276	-44.2	1.6496	1.573	-76.6	1.7054	1.5957	-109.7	1.7053	1.5493	-156	1.6621	1.5907	-71.4	1.7248	1.6319	-92.9	1.7559	1.6485	-107.4	1.817	1.7823	-34.7	1.9575	1.8397	-117.8	2.0048	1.9016	-103.2	2.1321	2.0651	-67
		24.4		1.7277	1.641	-86.7	1.6759	1.6249	-51	1.6407	1.575	-65.7	1.7103	1.5883	-122	1.7051	1.5534	-151.7	1.6636	1.5935	-70.1	1.7327	1.629	-103.7	1.7452	1.6537	-91.5	1.8229	1.7812	-41.7	1.9587	1.8419	-116.8	2.0009	1.9058	-95.1	2.1359	2.0592	-76.7
		24.4667		1.735	1.6326	-102.4	1.6665	1.621	-45.5	1.6604	1.5681	-92.3	1.7105	1.5872	-123.3	1.702	1.5558	-146.2	1.6719	1.5875	-84.4	1.7378	1.6264	-111.4	1.751	1.6547	-96.3	1.8333	1.7741	-59.2	1.9595	1.8438	-115.7	1.9995	1.9063	-93.2	2.1381	2.0661	-72
		24.5333		1.7255	1.6291	-96.4	1.6699	1.6226	-47.3	1.6496	1.5713	-78.3	1.712	1.583	-129	1.7033	1.5589	-144.4	1.669	1.5905	-78.5	1.7314	1.6252	-106.2	1.751	1.6549	-96.1	1.8296	1.7803	-49.3	1.9636	1.8488	-114.8	2.0061	1.9079	-98.2	2.1473	2.0649	-82.4
		24.6		1.7334	1.6377	-95.7	1.6702	1.6223	-47.9	1.6518	1.5643	-87.5	1.7094	1.5853	-124.1	1.6957	1.5431	-152.6	1.6713	1.588	-83.3	1.7252	1.6316	-93.6	1.7595	1.6579	-101.6	1.8226	1.7766	-46	1.9559	1.8432	-112.7	1.9897	1.9032	-86.5	2.1417	2.0499	-91.8
		24.6667		1.7297	1.6382	-91.5	1.6736	1.6263	-47.3	1.6549	1.567	-87.9	1.7038	1.5947	-109.1	1.6964	1.5506	-145.8	1.669	1.5832	-85.8	1.7259	1.6224	-103.5	1.7458	1.6515	-94.3	1.8183	1.777	-41.3	1.9673	1.8454	-121.9	1.9985	1.9108	-87.7	2.1292	2.0603	-68.9
		24.7333		1.7212	1.639	-82.2	1.6753	1.6116	-63.7	1.6489	1.5699	-79	1.7057	1.5854	-120.3	1.7071	1.5465	-160.6	1.6598	1.5835	-76.3	1.7292	1.6246	-104.6	1.7477	1.6441	-103.6	1.8316	1.7786	-53	1.9616	1.8358	-125.8	2.0026	1.91	-92.6	2.1325	2.054	-78.5
		24.8		1.7289	1.6382	-90.7	1.6651	1.6162	-48.9	1.6529	1.5684	-84.5	1.7099	1.5895	-120.4	1.7001	1.5504	-149.7	1.6651	1.5819	-83.2	1.7263	1.6281	-98.2	1.7541	1.6466	-107.5	1.818	1.7729	-45.1	1.9596	1.8419	-117.7	1.9971	1.9086	-88.5	2.1213	2.0645	-56.8
		24.8667		1.7371	1.6315	-105.6	1.6794	1.6245	-54.9	1.6444	1.572	-72.4	1.7188	1.5852	-133.6	1.7045	1.5533	-151.2	1.6729	1.5816	-91.3	1.7341	1.6265	-107.6	1.744	1.647	-97	1.8187	1.7746	-44.1	1.9539	1.8467	-107.2	1.9912	1.9094	-81.8	2.1315	2.058	-73.5
		24.9333		1.7271	1.6343	-92.8	1.669	1.6198	-49.2	1.6565	1.5633	-93.2	1.7196	1.5846	-135	1.6976	1.5565	-141.1	1.6759	1.5854	-90.5	1.7197	1.6311	-88.6	1.748	1.651	-97	1.8243	1.7766	-47.7	1.9592	1.8337	-125.5	1.9941	1.907	-87.1	2.1306	2.0603	-70.3
		25		1.7288	1.6324	-96.4	1.6688	1.6221	-46.7	1.6456	1.5619	-83.7	1.7109	1.5926	-118.3	1.7026	1.5562	-146.4	1.6662	1.5825	-83.7	1.7279	1.6331	-94.8	1.7535	1.6519	-101.6	1.8235	1.7812	-42.3	1.9631	1.8336	-129.5	1.9922	1.9004	-91.8	2.1353	2.0569	-78.4
		25.0667		1.7327	1.6324	-100.3	1.6785	1.6104	-68.1	1.6494	1.5701	-79.3	1.7112	1.5843	-126.9	1.6992	1.5544	-144.8	1.6681	1.5759	-92.2	1.7299	1.625	-104.9	1.7521	1.6504	-101.7	1.8215	1.7738	-47.7	1.9589	1.8381	-120.8	1.9922	1.9013	-90.9	2.1323	2.0637	-68.6
		25.1333		1.7271	1.6333	-93.8	1.6672	1.6175	-49.7	1.653	1.5721	-80.9	1.7177	1.5855	-132.2	1.7051	1.5473	-157.8	1.6606	1.5837	-76.9	1.7228	1.6238	-99	1.74	1.6468	-93.2	1.8249	1.7719	-53	1.9641	1.8287	-135.4	2.0029	1.9051	-97.8	2.1395	2.0606	-78.9
		25.2		1.7345	1.6233	-111.2	1.6853	1.613	-72.3	1.6531	1.5589	-94.2	1.7094	1.5864	-123	1.7037	1.5438	-159.9	1.6704	1.583	-87.4	1.7301	1.6204	-109.7	1.7485	1.6466	-101.9	1.8261	1.774	-52.1	1.9565	1.8321	-124.4	1.986	1.9147	-71.3	2.1307	2.0649	-65.8
		25.2667		1.7313	1.6237	-107.6	1.6756	1.6157	-59.9	1.6446	1.5649	-79.7	1.7116	1.5896	-122	1.7021	1.5459	-156.2	1.6706	1.5827	-87.9	1.73	1.6203	-109.7	1.7449	1.6443	-100.6	1.8239	1.7794	-44.5	1.9542	1.8359	-118.3	1.9926	1.8998	-92.8	2.1298	2.0499	-79.9
		25.3333		1.7238	1.631	-92.8	1.6714	1.6137	-57.7	1.6548	1.563	-91.8	1.7165	1.5853	-131.2	1.7006	1.5422	-158.4	1.6663	1.5771	-89.2	1.7304	1.6207	-109.7	1.7503	1.6505	-99.8	1.8191	1.7755	-43.6	1.9588	1.8332	-125.6	1.9995	1.9025	-97	2.1285	2.0519	-76.6
		25.4		1.7348	1.6281	-106.7	1.6806	1.614	-66.6	1.6551	1.5584	-96.7	1.7135	1.5853	-128.2	1.7033	1.5512	-152.1	1.6626	1.5828	-79.8	1.7219	1.6192	-102.7	1.7523	1.6515	-100.8	1.8256	1.7781	-47.5	1.9549	1.84	-114.9	2.0058	1.9048	-101	2.135	2.0632	-71.8
		25.4667		1.7232	1.6285	-94.7	1.6734	1.6149	-58.5	1.6439	1.5643	-79.6	1.7041	1.5789	-125.2	1.6998	1.5464	-153.4	1.6685	1.5801	-88.4	1.7273	1.6165	-110.8	1.7485	1.6513	-97.2	1.8312	1.7693	-61.9	1.9584	1.839	-119.4	2.0023	1.8966	-105.7	2.1347	2.06	-74.7
		25.5333		1.7268	1.619	-107.8	1.6713	1.6192	-52.1	1.6396	1.5659	-73.7	1.7066	1.5804	-126.2	1.6977	1.5537	-144	1.6649	1.5843	-80.6	1.7224	1.6265	-95.9	1.7473	1.6466	-100.7	1.8305	1.7758	-54.7	1.9554	1.8412	-114.2	2.0006	1.9065	-94.1	2.1307	2.053	-77.7
		25.6		1.7295	1.6242	-105.3	1.6665	1.6115	-55	1.6461	1.5663	-79.8	1.7179	1.5824	-135.5	1.7036	1.5501	-153.5	1.662	1.5809	-81.1	1.7208	1.6237	-97.1	1.7519	1.6513	-100.6	1.8241	1.7709	-53.2	1.9592	1.8395	-119.7	1.9962	1.9025	-93.7	2.1292	2.0649	-64.3
		25.6667		1.7246	1.6318	-92.8	1.6679	1.6135	-54.4	1.6477	1.5584	-89.3	1.7157	1.5838	-131.9	1.6995	1.5438	-155.7	1.6709	1.5736	-97.3	1.7237	1.6189	-104.8	1.7444	1.6396	-104.8	1.8204	1.7791	-41.3	1.9542	1.835	-119.2	2.0002	1.8991	-101.1	2.1362	2.0552	-81
		25.7333		1.7288	1.6236	-105.2	1.6696	1.6183	-51.3	1.6461	1.5626	-83.5	1.7055	1.5831	-122.4	1.701	1.5414	-159.6	1.6649	1.5771	-87.8	1.7319	1.6192	-112.7	1.748	1.6514	-96.6	1.8205	1.7645	-56	1.9596	1.8385	-121.1	1.9869	1.8958	-91.1	2.1286	2.0572	-71.4
		25.8		1.7257	1.6215	-104.2	1.6697	1.6115	-58.2	1.6555	1.5549	-100.6	1.7097	1.5802	-129.5	1.6992	1.5446	-154.6	1.6729	1.5749	-98	1.7242	1.6193	-104.9	1.7497	1.6432	-106.5	1.8168	1.7762	-40.6	1.9571	1.8293	-127.8	1.996	1.9099	-86.1	2.1284	2.0563	-72.1
		25.8667		1.7303	1.6339	-96.4	1.668	1.6045	-63.5	1.6438	1.5675	-76.3	1.7075	1.5784	-129.1	1.7011	1.5418	-159.3	1.6709	1.5725	-98.4	1.7263	1.6168	-109.5	1.7494	1.6441	-105.3	1.826	1.775	-51	1.9511	1.8319	-119.2	1.9925	1.9016	-90.9	2.124	2.063	-61
		25.9333		1.72	1.6222	-97.8	1.6726	1.6138	-58.8	1.6501	1.552	-98.1	1.7088	1.5756	-133.2	1.7005	1.5393	-161.2	1.6788	1.576	-102.8	1.7256	1.6154	-110.2	1.7545	1.6396	-114.9	1.8215	1.7735	-48	1.9528	1.8291	-123.7	2.0006	1.9043	-96.3	2.1281	2.0561	-72
		26		1.7269	1.6256	-101.3	1.6727	1.6078	-64.9	1.6578	1.5534	-104.4	1.7136	1.5809	-132.7	1.6942	1.5422	-152	1.6649	1.5776	-87.3	1.7277	1.6233	-104.4	1.7548	1.6447	-110.1	1.8282	1.7786	-49.6	1.9581	1.8309	-127.2	1.9993	1.9017	-97.6	2.12	2.0606	-59.4
		26.0667		1.7326	1.6225	-110.1	1.6737	1.611	-62.7	1.6421	1.5677	-74.4	1.7096	1.5757	-133.9	1.695	1.5429	-152.1	1.6696	1.5761	-93.5	1.7226	1.6192	-103.4	1.7517	1.6527	-99	1.8321	1.7786	-53.5	1.9519	1.8281	-123.8	1.9956	1.8988	-96.8	2.1248	2.0464	-78.4
		26.1333		1.73	1.6233	-106.7	1.67	1.6096	-60.4	1.6472	1.5574	-89.8	1.7103	1.5839	-126.4	1.6908	1.5436	-147.2	1.6702	1.5735	-96.7	1.7245	1.6147	-109.8	1.7437	1.6465	-97.2	1.8282	1.7806	-47.6	1.9544	1.8333	-121.1	1.9996	1.896	-103.6	2.1294	2.053	-76.4
		26.2		1.7258	1.6229	-102.9	1.6764	1.6069	-69.5	1.6434	1.557	-86.4	1.7141	1.5816	-132.5	1.6926	1.5408	-151.8	1.6659	1.5793	-86.6	1.723	1.6139	-109.1	1.7559	1.6534	-102.5	1.8223	1.7764	-45.9	1.954	1.834	-120	1.9923	1.8926	-99.7	2.1368	2.0676	-69.2
		26.2667		1.7306	1.6154	-115.2	1.6744	1.6062	-68.2	1.6448	1.5592	-85.6	1.7163	1.5822	-134.1	1.7003	1.5377	-162.6	1.6733	1.5683	-105	1.7273	1.6219	-105.4	1.7449	1.6442	-100.7	1.8274	1.7712	-56.2	1.9597	1.8443	-115.4	1.998	1.9026	-95.4	2.1375	2.0511	-86.4
		26.3333		1.7314	1.6166	-114.8	1.6703	1.6053	-65	1.639	1.5548	-84.2	1.7091	1.5713	-137.8	1.6976	1.5375	-160.1	1.6642	1.5704	-93.8	1.7276	1.623	-104.6	1.7497	1.6393	-110.4	1.8257	1.7688	-56.9	1.9613	1.8382	-123.1	1.9854	1.901	-84.4	2.1235	2.0538	-69.7
		26.4		1.7274	1.6139	-113.5	1.675	1.6064	-68.6	1.6492	1.5531	-96.1	1.7154	1.5777	-137.7	1.6967	1.5376	-159.1	1.6636	1.5714	-92.2	1.7283	1.6163	-112	1.7406	1.6417	-98.9	1.8206	1.7719	-48.7	1.9565	1.8335	-123	1.9956	1.8995	-96.1	2.1386	2.0573	-81.3
		26.4667		1.728	1.6151	-112.9	1.6684	1.6017	-66.7	1.653	1.5558	-97.2	1.7218	1.5719	-149.9	1.7057	1.5331	-172.6	1.6634	1.5683	-95.1	1.7227	1.626	-96.7	1.7458	1.6419	-103.9	1.8225	1.7667	-55.8	1.9565	1.8322	-124.3	1.9913	1.9087	-82.6	2.1253	2.0585	-66.8
		26.5333		1.7287	1.6186	-110.1	1.6678	1.6099	-57.9	1.6558	1.5619	-93.9	1.7213	1.5754	-145.9	1.6989	1.5404	-158.5	1.6633	1.5764	-86.9	1.7228	1.6154	-107.4	1.7457	1.6427	-103	1.8239	1.7691	-54.8	1.9544	1.8329	-121.5	2.0006	1.9061	-94.5	2.1258	2.0555	-70.3
		26.6		1.7306	1.6088	-121.8	1.6694	1.6084	-61	1.6469	1.5597	-87.2	1.7098	1.5745	-135.3	1.7099	1.5374	-172.5	1.672	1.5697	-102.3	1.7219	1.6156	-106.3	1.7531	1.6385	-114.6	1.8239	1.7614	-62.5	1.9576	1.8386	-119	1.9881	1.9158	-72.3	2.1197	2.0587	-61
		26.6667		1.726	1.6111	-114.9	1.6652	1.6126	-52.6	1.6456	1.5538	-91.8	1.7064	1.5778	-128.6	1.6969	1.5345	-162.4	1.6596	1.573	-86.6	1.7344	1.6078	-126.6	1.7522	1.6418	-110.4	1.8243	1.7672	-57.1	1.9581	1.8309	-127.2	2.0022	1.8983	-103.9	2.1278	2.0607	-67.1
		26.7333		1.7247	1.6203	-104.4	1.6695	1.6075	-62	1.6461	1.5454	-100.7	1.7112	1.5709	-140.3	1.7036	1.5466	-157	1.6788	1.5769	-101.9	1.7255	1.6234	-102.1	1.7471	1.6356	-111.5	1.8304	1.776	-54.4	1.9528	1.8299	-122.9	1.9894	1.9038	-85.6	2.1389	2.0518	-87.1
		26.8		1.7238	1.6192	-104.6	1.6777	1.6061	-71.6	1.6552	1.5531	-102.1	1.7071	1.5724	-134.7	1.6987	1.5322	-166.5	1.6674	1.5699	-97.5	1.7238	1.6101	-113.7	1.7442	1.6368	-107.4	1.834	1.7604	-73.6	1.9607	1.8361	-124.6	1.9866	1.904	-82.6	2.1314	2.0535	-77.9
		26.8667		1.7287	1.6153	-113.4	1.6718	1.5991	-72.7	1.6443	1.5495	-94.8	1.7078	1.5762	-131.6	1.7045	1.538	-166.5	1.6617	1.5639	-97.8	1.72	1.6105	-109.5	1.7447	1.6384	-106.3	1.8247	1.7652	-59.5	1.957	1.8278	-129.2	1.9953	1.8959	-99.4	2.1262	2.0624	-63.8
		26.9333		1.73	1.6138	-116.2	1.677	1.6051	-71.9	1.6608	1.5472	-113.6	1.7128	1.5707	-142.1	1.698	1.5415	-156.5	1.6679	1.566	-101.9	1.7292	1.6104	-118.8	1.7422	1.648	-94.2	1.8283	1.7653	-63	1.9649	1.8358	-129.1	1.9868	1.9035	-83.3	2.1278	2.0465	-81.3
		27		1.7307	1.6042	-126.5	1.6755	1.6123	-63.2	1.6461	1.5484	-97.7	1.6999	1.5721	-127.8	1.7046	1.5341	-170.5	1.6683	1.5666	-101.7	1.7314	1.6179	-113.5	1.7513	1.6428	-108.5	1.8196	1.767	-52.6	1.9546	1.833	-121.6	2	1.9006	-99.4	2.1333	2.0602	-73.1
		27.0667		1.719	1.6115	-107.5	1.6767	1.6006	-76.1	1.6482	1.5516	-96.6	1.706	1.5799	-126.1	1.6897	1.5351	-154.6	1.6682	1.5685	-99.7	1.7213	1.607	-114.3	1.7397	1.6421	-97.6	1.8243	1.7724	-51.9	1.9589	1.8318	-127.1	1.9806	1.9062	-74.4	2.1238	2.0548	-69
		27.1333		1.7324	1.6117	-120.7	1.6685	1.5987	-69.8	1.6397	1.5501	-89.6	1.7051	1.563	-142.1	1.7015	1.5349	-166.6	1.6678	1.5707	-97.1	1.7273	1.6111	-116.2	1.7511	1.6365	-114.6	1.8244	1.7693	-55.1	1.9545	1.836	-118.5	1.9895	1.89	-99.5	2.12	2.0499	-70.1
		27.2		1.7269	1.6083	-118.6	1.6725	1.6075	-65	1.6455	1.549	-96.5	1.7138	1.573	-140.8	1.7059	1.5377	-168.2	1.6684	1.5727	-95.7	1.7255	1.6147	-110.8	1.7511	1.6356	-115.5	1.82	1.7668	-53.2	1.9632	1.8374	-125.8	2.0083	1.9052	-103.1	2.1206	2.0494	-71.2
		27.2667		1.7281	1.6082	-119.9	1.6671	1.6011	-66	1.6486	1.5461	-102.5	1.7117	1.5701	-141.6	1.6917	1.5321	-159.6	1.6609	1.5605	-100.4	1.7236	1.6163	-107.3	1.7506	1.6378	-112.8	1.8162	1.7677	-48.5	1.9571	1.8291	-128	1.9917	1.8986	-93.1	2.1356	2.0527	-82.9
		27.3333		1.7315	1.6146	-116.9	1.6751	1.6044	-70.7	1.654	1.5529	-101.1	1.7066	1.5705	-136.1	1.7003	1.536	-164.3	1.6666	1.5657	-100.9	1.7261	1.6119	-114.2	1.7469	1.6346	-112.3	1.8222	1.771	-51.2	1.9532	1.8283	-124.9	1.9913	1.89	-101.3	2.126	2.0445	-81.5
		27.4		1.7231	1.6086	-114.5	1.6651	1.6013	-63.8	1.6489	1.5523	-96.6	1.7069	1.5733	-133.6	1.6991	1.5411	-158	1.6758	1.5713	-104.5	1.7267	1.6068	-119.9	1.7467	1.6387	-108	1.8255	1.7654	-60.1	1.9482	1.8258	-122.4	2.0007	1.9001	-100.6	2.1237	2.0544	-69.3
		27.4667		1.724	1.616	-108	1.6654	1.596	-69.4	1.6507	1.5378	-112.9	1.7152	1.5671	-148.1	1.703	1.537	-166	1.6671	1.5605	-106.6	1.7224	1.6085	-113.9	1.749	1.6362	-112.8	1.8166	1.772	-44.6	1.9515	1.8284	-123.1	1.9876	1.9027	-84.9	2.1273	2.06	-67.3
		27.5333		1.7221	1.6087	-113.4	1.6745	1.6	-74.5	1.6482	1.5495	-98.7	1.7142	1.5642	-150	1.6978	1.5324	-165.4	1.6595	1.5592	-100.3	1.7248	1.6019	-122.9	1.7453	1.6446	-100.7	1.8235	1.7724	-51.1	1.9505	1.8323	-118.2	1.9887	1.9015	-87.2	2.1215	2.0485	-73
		27.6		1.7222	1.6099	-112.3	1.6672	1.5938	-73.4	1.6499	1.5482	-101.7	1.7065	1.5683	-138.2	1.6964	1.5319	-164.5	1.6686	1.5668	-101.8	1.7258	1.614	-111.8	1.7507	1.6396	-111.1	1.8216	1.7708	-50.8	1.9551	1.8302	-124.9	1.9943	1.8932	-101.1	2.1212	2.0512	-70
		27.6667		1.7286	1.6044	-124.2	1.6762	1.593	-83.2	1.6477	1.5533	-94.4	1.7089	1.5642	-144.7	1.7011	1.5372	-163.9	1.6671	1.5633	-103.8	1.728	1.6064	-121.6	1.7497	1.6395	-110.2	1.8187	1.7565	-62.2	1.9572	1.8288	-128.4	2.0025	1.8998	-102.7	2.1334	2.0473	-86.1
		27.7333		1.7279	1.5976	-130.3	1.6729	1.6009	-72	1.6446	1.5409	-103.7	1.7117	1.5648	-146.9	1.6992	1.528	-171.2	1.6614	1.5704	-91	1.7238	1.6089	-114.9	1.743	1.6361	-106.9	1.8199	1.7643	-55.6	1.9583	1.833	-125.3	1.9988	1.9026	-96.2	2.1233	2.0577	-65.6
		27.8		1.7261	1.6065	-119.6	1.6707	1.5996	-71.1	1.6467	1.5517	-95	1.7118	1.567	-144.8	1.7006	1.5334	-167.2	1.6619	1.5626	-99.3	1.727	1.6032	-123.8	1.7504	1.6318	-118.6	1.8203	1.768	-52.3	1.9579	1.8319	-126	1.9931	1.8944	-98.7	2.1299	2.0454	-84.5
		27.8667		1.7242	1.6044	-119.8	1.6781	1.5987	-79.4	1.6423	1.5455	-96.8	1.7152	1.5629	-152.3	1.7098	1.5298	-180	1.6622	1.566	-96.2	1.7209	1.6032	-117.7	1.7442	1.632	-112.2	1.8181	1.7617	-56.4	1.9579	1.825	-132.9	1.9885	1.8997	-88.8	2.1328	2.0498	-83
		27.9333		1.7232	1.6092	-114	1.6672	1.6015	-65.7	1.6547	1.5451	-109.6	1.7087	1.5639	-144.8	1.7031	1.5301	-173	1.6677	1.5557	-112	1.7338	1.6037	-130.1	1.7442	1.6332	-111	1.8142	1.7729	-41.3	1.9582	1.8267	-131.5	1.9928	1.8951	-97.7	2.1221	2.0532	-68.9
		28		1.7228	1.6039	-118.9	1.6762	1.5889	-87.3	1.649	1.5451	-103.9	1.7107	1.5671	-143.6	1.6982	1.5328	-165.4	1.6661	1.5647	-101.4	1.7308	1.6049	-125.9	1.7499	1.634	-115.9	1.8184	1.7617	-56.7	1.9528	1.8329	-119.9	1.9961	1.8949	-101.2	2.1298	2.0568	-73
		28.0667		1.7292	1.605	-124.2	1.6665	1.5919	-74.6	1.6464	1.5434	-103	1.7108	1.5628	-148	1.6951	1.5331	-162	1.6642	1.5612	-103	1.7198	1.6089	-110.9	1.7461	1.639	-107.1	1.8197	1.7631	-56.6	1.9651	1.8354	-129.7	1.9944	1.8927	-101.7	2.1332	2.046	-87.2
		28.1333		1.7317	1.6027	-129	1.6731	1.5872	-85.9	1.651	1.5438	-107.2	1.7093	1.5667	-142.6	1.6941	1.5295	-164.6	1.6622	1.5591	-103.1	1.721	1.6026	-118.4	1.7429	1.6314	-111.5	1.8327	1.7647	-68	1.9536	1.8268	-126.8	1.9904	1.8933	-97.1	2.1276	2.0489	-78.7
		28.2		1.7219	1.6008	-121.1	1.6732	1.5975	-75.7	1.6494	1.5422	-107.2	1.7099	1.5687	-141.2	1.686	1.5307	-155.3	1.6704	1.5582	-112.2	1.7359	1.6041	-131.8	1.7479	1.6305	-117.4	1.8287	1.7553	-73.4	1.9586	1.8281	-130.5	1.9933	1.8987	-94.6	2.1226	2.0515	-71.1
		28.2667		1.729	1.5949	-134.1	1.6762	1.5921	-84.1	1.6477	1.5472	-100.5	1.7092	1.5626	-146.6	1.7015	1.5242	-177.3	1.6624	1.5659	-96.5	1.7254	1.6043	-121.1	1.7468	1.6367	-110.1	1.8206	1.7618	-58.8	1.9539	1.8192	-134.7	1.9964	1.8976	-98.8	2.1253	2.0547	-70.6
		28.3333		1.7208	1.601	-119.8	1.666	1.5885	-77.5	1.6499	1.5384	-111.5	1.7089	1.563	-145.9	1.6975	1.5344	-163.1	1.6713	1.5578	-113.5	1.7272	1.6066	-120.6	1.7471	1.6318	-115.3	1.8194	1.7611	-58.3	1.9556	1.8266	-129	1.9936	1.896	-97.6	2.1277	2.0516	-76.1
		28.4		1.7265	1.6091	-117.4	1.6696	1.5981	-71.5	1.6491	1.5454	-103.7	1.7103	1.565	-145.3	1.7024	1.5283	-174.1	1.6588	1.5554	-103.4	1.7257	1.5976	-128.1	1.7527	1.6295	-123.2	1.8203	1.7563	-64	1.956	1.8288	-127.2	1.9872	1.894	-93.2	2.1221	2.0449	-77.2
		28.4667		1.7338	1.6011	-132.7	1.6675	1.5923	-75.2	1.6444	1.5419	-102.5	1.716	1.5649	-151.1	1.7	1.5252	-174.8	1.6708	1.5596	-111.2	1.7272	1.6036	-123.6	1.7556	1.6318	-123.8	1.822	1.7612	-60.8	1.962	1.8252	-136.8	1.9954	1.8926	-102.8	2.1225	2.0502	-72.3
		28.5333		1.7257	1.6057	-120	1.6655	1.5897	-75.8	1.6602	1.545	-115.2	1.7063	1.5604	-145.9	1.7035	1.5226	-180.9	1.6683	1.5646	-103.7	1.7314	1.5957	-135.7	1.7502	1.6312	-119	1.8195	1.765	-54.5	1.9533	1.8225	-130.8	1.9909	1.8925	-98.4	2.1393	2.0533	-86
		28.6		1.7328	1.5979	-134.9	1.6721	1.5873	-84.8	1.6517	1.5422	-109.5	1.7129	1.5565	-156.4	1.6959	1.5277	-168.2	1.6641	1.554	-110.1	1.7145	1.5976	-116.9	1.7457	1.6351	-110.6	1.8176	1.7617	-55.9	1.9556	1.8294	-126.2	1.9776	1.8923	-85.3	2.1187	2.0468	-71.9
		28.6667		1.7224	1.5986	-123.8	1.6814	1.5898	-91.6	1.6432	1.537	-106.2	1.7128	1.5667	-146.1	1.6974	1.5242	-173.2	1.6676	1.5617	-105.9	1.7282	1.6007	-127.5	1.7541	1.6363	-117.8	1.8224	1.7655	-56.9	1.9536	1.8236	-130	1.983	1.8901	-92.9	2.1204	2.0511	-69.3
		28.7333		1.7212	1.5938	-127.4	1.6767	1.5878	-88.9	1.6484	1.5408	-107.6	1.7116	1.5675	-144.1	1.6894	1.5255	-163.9	1.6633	1.5539	-109.4	1.7304	1.5979	-132.5	1.7492	1.6372	-112	1.8209	1.7647	-56.2	1.9507	1.8299	-120.8	1.9969	1.9035	-93.4	2.1293	2.0535	-75.8
		28.8		1.7262	1.5998	-126.4	1.6748	1.5878	-87	1.6462	1.5426	-103.6	1.7125	1.5622	-150.3	1.6947	1.5325	-162.2	1.6665	1.5546	-111.9	1.7242	1.6046	-119.6	1.7442	1.6305	-113.7	1.8212	1.7618	-59.4	1.9558	1.8146	-141.2	1.9893	1.9045	-84.8	2.1277	2.0621	-65.6
		28.8667		1.7264	1.6006	-125.8	1.6802	1.5854	-94.8	1.6535	1.5357	-117.8	1.7067	1.5599	-146.8	1.7011	1.523	-178.1	1.6629	1.5512	-111.7	1.7276	1.5984	-129.2	1.7461	1.6381	-108	1.8171	1.7538	-63.3	1.9556	1.8203	-135.3	1.9894	1.8981	-91.3	2.1179	2.0471	-70.8
		28.9333		1.7191	1.5968	-122.3	1.6696	1.5812	-88.4	1.6554	1.5473	-108.1	1.7089	1.5606	-148.3	1.6951	1.525	-170.1	1.6711	1.559	-112.1	1.7321	1.5997	-132.4	1.7439	1.6306	-113.3	1.8184	1.7585	-59.9	1.9548	1.8189	-135.9	1.9929	1.8914	-101.5	2.1265	2.0497	-76.8
		29		1.7219	1.5943	-127.6	1.6775	1.582	-95.5	1.6503	1.5398	-110.5	1.7014	1.5567	-144.7	1.7	1.5144	-185.6	1.6649	1.5579	-107	1.7278	1.601	-126.8	1.7454	1.6369	-108.5	1.8268	1.7581	-68.7	1.9548	1.8297	-125.1	1.9838	1.8865	-97.3	2.1361	2.0482	-87.9
		29.0667		1.7195	1.5972	-122.3	1.672	1.5879	-84.1	1.6517	1.5394	-112.3	1.7053	1.5525	-152.8	1.6939	1.5229	-171	1.6649	1.5579	-107	1.7201	1.6024	-117.7	1.7546	1.631	-123.6	1.8196	1.7616	-58	1.9571	1.8243	-132.8	1.9911	1.8908	-100.3	2.1285	2.0592	-69.3
		29.1333		1.7247	1.5957	-129	1.6663	1.5786	-87.7	1.6487	1.5391	-109.6	1.707	1.5557	-151.3	1.7011	1.5187	-182.4	1.6674	1.5589	-108.5	1.7193	1.5977	-121.6	1.7516	1.6289	-122.7	1.8309	1.7612	-69.7	1.953	1.8297	-123.3	1.9969	1.8977	-99.2	2.1393	2.048	-91.3
		29.2		1.7243	1.5951	-129.2	1.6625	1.5838	-78.7	1.6478	1.5321	-115.7	1.7088	1.5553	-153.5	1.6963	1.5142	-182.1	1.6644	1.5573	-107.1	1.7273	1.597	-130.3	1.7486	1.6227	-125.9	1.829	1.7597	-69.3	1.9512	1.8246	-126.6	1.9885	1.8938	-94.7	2.1255	2.0503	-75.2
		29.2667		1.726	1.594	-132	1.6669	1.5822	-84.7	1.6437	1.5334	-110.3	1.7077	1.5577	-150	1.6951	1.52	-175.1	1.669	1.5535	-115.5	1.7277	1.6006	-127.1	1.7491	1.6259	-123.2	1.8153	1.7535	-61.8	1.9557	1.8224	-133.3	1.9954	1.8969	-98.5	2.1269	2.0499	-77
		29.3333		1.7318	1.5916	-140.2	1.6781	1.5845	-93.6	1.6533	1.5354	-117.9	1.7106	1.5544	-156.2	1.6966	1.518	-178.6	1.6708	1.5528	-118	1.7286	1.5947	-133.9	1.7413	1.6335	-107.8	1.8244	1.7605	-63.9	1.9626	1.8233	-139.3	1.9937	1.8954	-98.3	2.1292	2.0502	-79
		29.4		1.7277	1.5892	-138.5	1.676	1.5851	-90.9	1.6456	1.5308	-114.8	1.7036	1.5539	-149.7	1.6907	1.5207	-170	1.6696	1.5541	-115.5	1.7183	1.5972	-121.1	1.7437	1.6257	-118	1.8212	1.753	-68.2	1.9564	1.8224	-134	1.9927	1.8935	-99.2	2.1188	2.0484	-70.4
		29.4667		1.7221	1.5932	-128.9	1.6644	1.5835	-80.9	1.6445	1.5332	-111.3	1.7189	1.5529	-166	1.6945	1.517	-177.5	1.6656	1.5543	-111.3	1.7196	1.5876	-132	1.7381	1.6234	-114.7	1.8291	1.7588	-70.3	1.95	1.8248	-125.2	1.9905	1.8888	-101.7	2.1199	2.0526	-67.3
		29.5333		1.7239	1.5842	-139.7	1.6682	1.5788	-89.4	1.6499	1.5264	-123.5	1.708	1.5463	-161.7	1.7032	1.5147	-188.5	1.6771	1.5582	-118.9	1.7193	1.5964	-122.9	1.7465	1.6315	-115	1.8134	1.7582	-55.2	1.951	1.8252	-125.8	1.9973	1.8965	-100.8	2.1248	2.0464	-78.4
		29.6		1.727	1.5878	-139.2	1.6717	1.5763	-95.4	1.6466	1.5328	-113.8	1.7151	1.5613	-153.8	1.7026	1.5146	-188	1.672	1.549	-123	1.7255	1.5983	-127.2	1.754	1.625	-129	1.8239	1.7609	-63	1.9434	1.8303	-113.1	1.9984	1.8926	-105.8	2.1257	2.0456	-80.1
		29.6667		1.719	1.5909	-128.1	1.665	1.5822	-82.8	1.6455	1.5311	-114.4	1.7112	1.5496	-161.6	1.7002	1.5234	-176.8	1.6704	1.5532	-117.2	1.7299	1.5932	-136.7	1.7442	1.6307	-113.5	1.819	1.7524	-66.6	1.9486	1.8204	-128.2	1.9829	1.8944	-88.5	2.1299	2.0529	-77
		29.7333		1.7227	1.5935	-129.2	1.672	1.5738	-98.2	1.645	1.5324	-112.6	1.7092	1.5548	-154.4	1.7046	1.5237	-180.9	1.6706	1.5488	-121.8	1.7225	1.5985	-124	1.7439	1.6299	-114	1.8184	1.7609	-57.5	1.9662	1.8227	-143.5	1.9903	1.8985	-91.8	2.1218	2.0493	-72.5
		29.8		1.7315	1.5872	-144.3	1.6757	1.5742	-101.5	1.6534	1.533	-120.4	1.7024	1.5543	-148.1	1.6959	1.521	-174.9	1.6704	1.5483	-122.1	1.7266	1.598	-128.6	1.7467	1.6272	-119.5	1.8149	1.756	-58.9	1.9546	1.8267	-127.9	1.9924	1.8884	-104	2.1384	2.0445	-93.9
		29.8667		1.7295	1.5848	-144.7	1.6712	1.5796	-91.6	1.6408	1.5306	-110.2	1.7086	1.547	-161.6	1.701	1.5143	-186.7	1.6606	1.5488	-111.8	1.7287	1.5971	-131.6	1.7476	1.6321	-115.5	1.8179	1.7593	-58.6	1.9533	1.822	-131.3	1.9895	1.8844	-105.1	2.1325	2.0523	-80.2
		29.9333		1.7314	1.5908	-140.6	1.6736	1.5813	-92.3	1.6398	1.5215	-118.3	1.7044	1.5531	-151.3	1.6927	1.5212	-171.5	1.659	1.5485	-110.5	1.7256	1.5958	-129.8	1.7461	1.6239	-122.2	1.8327	1.7526	-80.1	1.962	1.8288	-133.2	1.9831	1.8871	-96	2.1279	2.0541	-73.8
		30		1.7226	1.5894	-133.2	1.6749	1.5793	-95.6	1.6489	1.5388	-110.1	1.7034	1.5501	-153.3	1.7024	1.5168	-185.6	1.6607	1.5457	-115	1.7236	1.5945	-129.1	1.7475	1.6279	-119.6	1.8192	1.7572	-62	1.9509	1.828	-122.9	1.9874	1.8946	-92.8	2.1288	2.0487	-80.1
		30.0667		1.7229	1.5912	-131.7	1.6711	1.5911	-80	1.6501	1.5292	-120.9	1.7143	1.5544	-159.9	1.7046	1.5164	-188.2	1.6608	1.5448	-116	1.7209	1.5912	-129.7	1.7397	1.6263	-113.4	1.8225	1.7544	-68.1	1.9479	1.8192	-128.7	1.993	1.8895	-103.5	2.1222	2.0489	-73.3
		30.1333		1.7205	1.5875	-133	1.6777	1.5819	-95.8	1.6508	1.5247	-126.1	1.7044	1.546	-158.4	1.6959	1.5169	-179	1.6739	1.5515	-122.4	1.7249	1.5886	-136.3	1.7481	1.6315	-116.6	1.8222	1.7576	-64.6	1.954	1.819	-135	1.9852	1.8966	-88.6	2.1304	2.0495	-80.9
		30.2		1.7288	1.5895	-139.3	1.6688	1.5829	-85.9	1.6441	1.523	-121.1	1.709	1.5494	-159.6	1.7024	1.5107	-191.7	1.665	1.5565	-108.5	1.7223	1.5894	-132.9	1.7451	1.6183	-126.8	1.8184	1.7601	-58.3	1.9515	1.8178	-133.7	1.9839	1.8895	-94.4	2.1287	2.0481	-80.6
		30.2667		1.7327	1.579	-153.7	1.6739	1.5747	-99.2	1.6495	1.5317	-117.8	1.7099	1.5483	-161.6	1.7017	1.5108	-190.9	1.6586	1.5456	-113	1.7221	1.5918	-130.3	1.7458	1.6294	-116.4	1.8168	1.7577	-59.1	1.9551	1.8129	-142.2	1.9974	1.8926	-104.8	2.1274	2.0401	-87.3
		30.3333		1.7204	1.5802	-140.2	1.67	1.5774	-92.6	1.6555	1.5303	-125.2	1.7121	1.5474	-164.7	1.6969	1.5114	-185.5	1.6659	1.5491	-116.8	1.7225	1.5917	-130.8	1.7445	1.6166	-127.9	1.8258	1.7517	-74.1	1.9579	1.8332	-124.7	1.9968	1.8962	-100.6	2.1189	2.0453	-73.6
		30.4		1.7173	1.5859	-131.4	1.6664	1.579	-87.4	1.6551	1.525	-130.1	1.7055	1.5536	-151.9	1.6912	1.5141	-177.1	1.6682	1.5415	-126.7	1.7211	1.5827	-138.4	1.7509	1.6333	-117.6	1.824	1.7551	-68.9	1.958	1.8254	-132.6	1.9955	1.9024	-93.1	2.1272	2.0485	-78.7
		30.4667		1.7285	1.5827	-145.8	1.6732	1.5742	-99	1.6462	1.5238	-122.4	1.7017	1.5479	-153.8	1.6976	1.5136	-184	1.6685	1.5461	-122.4	1.728	1.5852	-142.8	1.7498	1.6305	-119.3	1.8202	1.7543	-65.9	1.957	1.8278	-129.2	1.9992	1.89	-109.2	2.1213	2.0493	-72
		30.5333		1.7227	1.5841	-138.6	1.6672	1.5678	-99.4	1.6492	1.5234	-125.8	1.7076	1.5441	-163.5	1.7037	1.5201	-183.6	1.6654	1.5424	-123	1.7177	1.5863	-131.4	1.7373	1.6241	-113.2	1.8192	1.7474	-71.8	1.9529	1.8145	-138.4	1.9928	1.891	-101.8	2.1285	2.0452	-83.3
		30.6		1.7209	1.5875	-133.4	1.6752	1.5747	-100.5	1.6427	1.529	-113.7	1.709	1.5479	-161.1	1.7032	1.5126	-190.6	1.667	1.5462	-120.8	1.721	1.5862	-134.8	1.7385	1.6231	-115.4	1.8204	1.7579	-62.5	1.9471	1.8256	-121.5	1.9889	1.8909	-98	2.1165	2.0568	-59.7
		30.6667		1.7233	1.5821	-141.2	1.6739	1.5715	-102.4	1.6529	1.5221	-130.8	1.7124	1.5483	-164.1	1.6957	1.5102	-185.5	1.6597	1.5406	-119.1	1.7258	1.5939	-131.9	1.751	1.6212	-129.8	1.8219	1.7514	-70.5	1.9621	1.822	-140.1	1.9874	1.8913	-96.1	2.1182	2.0506	-67.6
		30.7333		1.7206	1.591	-129.6	1.6704	1.575	-95.4	1.6433	1.5218	-121.5	1.7051	1.536	-169.1	1.6971	1.512	-185.1	1.6704	1.5367	-133.7	1.7172	1.5937	-123.5	1.7443	1.622	-122.3	1.8229	1.7535	-69.4	1.9564	1.8188	-137.6	1.9955	1.8984	-97.1	2.1172	2.0478	-69.4
		30.8		1.7345	1.5839	-150.6	1.6721	1.5718	-100.3	1.6423	1.5257	-116.6	1.7134	1.5435	-169.9	1.6924	1.5092	-183.2	1.6675	1.5468	-120.7	1.7243	1.591	-133.3	1.7443	1.6155	-128.8	1.8203	1.75	-70.3	1.9472	1.8191	-128.1	1.9893	1.8883	-101	2.1262	2.0549	-71.3
		30.8667		1.7218	1.5789	-142.9	1.6672	1.5714	-95.8	1.6524	1.5263	-126.1	1.7053	1.5407	-164.6	1.6924	1.5113	-181.1	1.664	1.5408	-123.2	1.7207	1.5818	-138.9	1.746	1.6258	-120.2	1.8179	1.7538	-64.1	1.9592	1.8212	-138	1.9961	1.8888	-107.3	2.1319	2.0553	-76.6
		30.9333		1.7186	1.5808	-137.8	1.6707	1.5729	-97.8	1.6461	1.5281	-118	1.7041	1.5449	-159.2	1.6927	1.5136	-179.1	1.6594	1.5397	-119.7	1.7212	1.5892	-132	1.752	1.621	-131	1.8126	1.7524	-60.2	1.9605	1.8182	-142.3	1.9961	1.8869	-109.2	2.1331	2.0601	-73
		31		1.7273	1.5876	-139.7	1.6702	1.5797	-90.5	1.6482	1.5235	-124.7	1.7059	1.5435	-162.4	1.6957	1.5151	-180.6	1.669	1.5468	-122.2	1.7184	1.5861	-132.3	1.7489	1.6211	-127.8	1.8154	1.7584	-57	1.9534	1.8181	-135.3	1.9886	1.8868	-101.8	2.1216	2.0459	-75.7
		31.0667		1.7168	1.5816	-135.2	1.6665	1.5706	-95.9	1.6445	1.5212	-123.3	1.707	1.5425	-164.5	1.6983	1.5131	-185.2	1.6655	1.5373	-128.2	1.7191	1.5793	-139.8	1.7492	1.6134	-135.8	1.821	1.7511	-69.9	1.9498	1.8112	-138.6	1.9905	1.891	-99.5	2.1195	2.0486	-70.9

## Sheet: Coupling Enzyme Parameters
	DEAMINATION REACTION
	Co-Substrate for Methyl Transfer (Select ONE)					SAM	8-aza-SAM		pH of EXPERIMENT	6.8
						YES	NO
	De Parameters for DEAMINATION RECTIONS					De MAX (ACIDIC)	De MAX (BASIC)	pKa
						(mM-1 cm-1)	(mM-1 cm-1)	deaminated product
	with SAM (recorded at 263 nm)					-8076	-4655	8.72
	with 8-aza-SAM		recorded at (Select ONE)	282 nm	NO	-14975	-2026	7.29			SENSITIVE FOR MOST pHs (<8.00)
				292 nm	NO	-10117	-3016	7.3			SENSITIVE FOR HIGH pHs (>8.00)
	De for SPECIFIC EXPERIMENTAL CONDITIONS is:					-8035.36	(mM-1 cm-1)	-8035.36
	INSTRUCTIONS:
	The PINK cells MUST NOT be edited; data in these cells correspond to universal parameters established within the article.
	ONLY GREEN and BLUE cells should be filed: user MUST input a 'YES' or 'NO' answer within GREEN cells.
	Likewise, user MUST input the experimental pH value she/he used within BLUE cell.

## Sheet: My 1-Step EZ-MTase RESULTS
	Sinefungin Inhibition Experiments
	LEVEL 1:
	For each substrate concentration, input the value (mAbs/min)
	of the matching Initial Slope from the GRAPH onto the left.
		GsSDMT RATES		(CORRECTED for SAM and SIN catabolism)
		[SIN]	Init slope (mAbs/min)	TIME FRAME	Ratio (V/V0)	Log [SIN] (M)	Ratio V/V0
		mM
		0	-8.7413	0-30 min	1	-7.08991	1
		0.813	-8.0629	0-30 min	0.922391	-6.08991	0.922391
		1.626	-7.335	0-30 min	0.83912	-5.78888	0.83912
		3.252	-7.343	0-30 min	0.840035	-5.48785	0.840035
		5.691	-6.588	0-30 min	0.753664	-5.24481	0.753664
		8.13	-7.0545	0-30 min	0.807031	-5.08991	0.807031
		16.26	-6.3311	0-30 min	0.724274	-4.78888	0.724274
		40.65	-4.6225	0-30 min	0.528812	-4.39094	0.528812
		81.3	-3.5937	0-30 min	0.411117	-4.08991	0.411117
		121.95	-2.8856	0-30 min	0.330111	-3.91382	0.330111
		162.6	-2.2169	0-30 min	0.253612	-3.78888	0.253612
		243.9	-1.7507	0-30 min	0.200279	-3.61279	0.200279
					CONGRATS!
					YOUR KINETIC DATA
					with its FIT
					LEVEL 2:	Enter guess values forKi and Hilton Coefficient (g) in GREEN cells.
						Enter your MTase enzyme concentration (BLUE cell).
						Enter your SAM concentration and its Km (BLUE cell).
						Use SOLVER to fit your data (see picture on the RIGHT).
		FOR FIT ONLY
		Log [SIN] (M)	Ratio V/V0	Predicted Ratio	c 2		Ki (M)		1.81928e-06	Best Fit Values
							g		0.692089																												Curve Fit
							Km (mM)		95	[SAM] (mM)		763
		-7.08991	1	0.98728	0.0001618		[Mtase] (mM)		0.1952																												Log [SIN]		Ratio V/V0
		-6.08991	0.922391	0.940374	0.000323362																																(M)
		-5.78888	0.83912	0.907077	0.0046182		Sc2		0.0162751
		-5.48785	0.840035	0.857996	0.000322577																																-7.08991			0.98728
		-5.24481	0.753664	0.803993	0.002533																																-7.076			0.986999
		-5.08991	0.807031	0.762165	0.00201294																																-7.06209			0.986711
		-4.78888	0.724274	0.664824	0.00353433																																-7.04818			0.986417
		-4.39094	0.528812	0.512675	0.000260371																																-7.03428			0.986117
		-4.08991	0.411117	0.394364	0.000280689																																-7.02037			0.98581
		-3.91382	0.330111	0.329682	1.8428e-07																																-7.00646			0.985497
		-3.78888	0.253612	0.287261	0.00113222																																-6.99255			0.985177
		-3.61279	0.200279	0.233376	0.00109542																																-6.97864			0.98485
																																					-6.96473			0.984515
																																					-6.95082			0.984174
																																					-6.93692			0.983825
																																					-6.92301			0.983468
																																					-6.9091			0.983104
																																					-6.89519			0.982732
																																					-6.88128			0.982352
																																					-6.86737			0.981963
																																					-6.85347			0.981566
																																					-6.83956			0.981161
																																					-6.82565			0.980747
																																					-6.81174			0.980324
																																					-6.79783			0.979892
																																					-6.78392			0.979451
																																					-6.77001			0.979
																																					-6.75611			0.978539
																																					-6.7422			0.978069
																																					-6.72829			0.977588
																																					-6.71438			0.977097
																																					-6.70047			0.976596
																																					-6.68656			0.976084
																																					-6.67265			0.975561
																																					-6.65875			0.975027
																																					-6.64484			0.974482
																																					-6.63093			0.973925
																																					-6.61702			0.973356
																																					-6.60311			0.972775
																																					-6.5892			0.972182
																																					-6.5753			0.971576
																																					-6.56139			0.970958
																																					-6.54748			0.970326
																																					-6.53357			0.969681
																																					-6.51966			0.969023
																																					-6.50575			0.96835
																																					-6.49184			0.967664
																																					-6.47794			0.966963
																																					-6.46403			0.966248
																																					-6.45012			0.965517
																																					-6.43621			0.964772
																																					-6.4223			0.964011
																																					-6.40839			0.963234
																																					-6.39449			0.962441
																																					-6.38058			0.961631
																																					-6.36667			0.960805
																																					-6.35276			0.959962
																																					-6.33885			0.959101
																																					-6.32494			0.958223
																																					-6.31103			0.957326
																																					-6.29713			0.956412
																																					-6.28322			0.955478
																																					-6.26931			0.954526
																																					-6.2554			0.953554
																																					-6.24149			0.952562
																																					-6.22758			0.951551
																																					-6.21367			0.950519
																																					-6.19977			0.949466
																																					-6.18586			0.948392
																																					-6.17195			0.947296
																																					-6.15804			0.946178
																																					-6.14413			0.945038
																																					-6.13022			0.943876
																																					-6.11632			0.94269
																																					-6.10241			0.941481
																																					-6.0885			0.940247
																																					-6.07459			0.93899
																																					-6.06068			0.937708
																																					-6.04677			0.936401
																																					-6.03286			0.935068
																																					-6.01896			0.933709
																																					-6.00505			0.932324
																																					-5.99114			0.930912
																																					-5.97723			0.929473
																																					-5.96332			0.928006
																																					-5.94941			0.926511
																																					-5.93551			0.924987
																																					-5.9216			0.923435
																																					-5.90769			0.921853
																																					-5.89378			0.920241
																																					-5.87987			0.918599
																																					-5.86596			0.916926
																																					-5.85205			0.915222
																																					-5.83815			0.913487
																																					-5.82424			0.911719
																																					-5.81033			0.909919
																																					-5.79642			0.908085
																																					-5.78251			0.906219
																																					-5.7686			0.904318
																																					-5.75469			0.902383
																																					-5.74079			0.900413
																																					-5.72688			0.898408
																																					-5.71297			0.896367
																																					-5.69906			0.89429
																																					-5.68515			0.892176
																																					-5.67124			0.890025
																																					-5.65734			0.887837
																																					-5.64343			0.885611
																																					-5.62952			0.883346
																																					-5.61561			0.881043
																																					-5.6017			0.8787
																																					-5.58779			0.876318
																																					-5.57388			0.873895
																																					-5.55998			0.871432
																																					-5.54607			0.868928
																																					-5.53216			0.866383
																																					-5.51825			0.863797
																																					-5.50434			0.861168
																																					-5.49043			0.858497
																																					-5.47653			0.855783
																																					-5.46262			0.853026
																																					-5.44871			0.850225
																																					-5.4348			0.84738
																																					-5.42089			0.844492
																																					-5.40698			0.841559
																																					-5.39307			0.838581
																																					-5.37917			0.835558
																																					-5.36526			0.83249
																																					-5.35135			0.829377
																																					-5.33744			0.826217
																																					-5.32353			0.823012
																																					-5.30962			0.81976
																																					-5.29571			0.816462
																																					-5.28181			0.813117
																																					-5.2679			0.809726
																																					-5.25399			0.806287
																																					-5.24008			0.802802
																																					-5.22617			0.799269
																																					-5.21226			0.79569
																																					-5.19836			0.792063
																																					-5.18445			0.788389
																																					-5.17054			0.784668
																																					-5.15663			0.780899
																																					-5.14272			0.777083
																																					-5.12881			0.77322
																																					-5.1149			0.76931
																																					-5.101			0.765353
																																					-5.08709			0.761349
																																					-5.07318			0.757299
																																					-5.05927			0.753202
																																					-5.04536			0.749058
																																					-5.03145			0.744869
																																					-5.01755			0.740634
																																					-5.00364			0.736354
																																					-4.98973			0.732028
																																					-4.97582			0.727658
																																					-4.96191			0.723244
																																					-4.948			0.718785
																																					-4.93409			0.714284
																																					-4.92019			0.709739
																																					-4.90628			0.705152
																																					-4.89237			0.700523
																																					-4.87846			0.695852
																																					-4.86455			0.691141
																																					-4.85064			0.68639
																																					-4.83673			0.681599
																																					-4.82283			0.676769
																																					-4.80892			0.671902
																																					-4.79501			0.666997
																																					-4.7811			0.662056
																																					-4.76719			0.65708
																																					-4.75328			0.652068
																																					-4.73938			0.647023
																																					-4.72547			0.641944
																																					-4.71156			0.636834
																																					-4.69765			0.631693
																																					-4.68374			0.626521
																																					-4.66983			0.62132
																																					-4.65592			0.616092
																																					-4.64202			0.610836
																																					-4.62811			0.605554
																																					-4.6142			0.600248
																																					-4.60029			0.594918
																																					-4.58638			0.589565
																																					-4.57247			0.584192
																																					-4.55857			0.578798
																																					-4.54466			0.573385
																																					-4.53075			0.567955
																																					-4.51684			0.562508
																																					-4.50293			0.557046
																																					-4.48902			0.55157
																																					-4.47511			0.546082
																																					-4.46121			0.540583
																																					-4.4473			0.535073
																																					-4.43339			0.529555
																																					-4.41948			0.52403
																																					-4.40557			0.518499
																																					-4.39166			0.512964
																																					-4.37775			0.507425
																																					-4.36385			0.501884
																																					-4.34994			0.496343
																																					-4.33603			0.490803
																																					-4.32212			0.485265
																																					-4.30821			0.479731
																																					-4.2943			0.474202
																																					-4.2804			0.468679
																																					-4.26649			0.463163
																																					-4.25258			0.457657
																																					-4.23867			0.452161
																																					-4.22476			0.446677
																																					-4.21085			0.441205
																																					-4.19694			0.435748
																																					-4.18304			0.430307
																																					-4.16913			0.424882
																																					-4.15522			0.419475
																																					-4.14131			0.414087
																																					-4.1274			0.40872
																																					-4.11349			0.403375
																																					-4.09959			0.398052
																																					-4.08568			0.392754
																																					-4.07177			0.38748
																																					-4.05786			0.382233
																																					-4.04395			0.377013
																																					-4.03004			0.371822
																																					-4.01613			0.36666
																																					-4.00223			0.361528
																																					-3.98832			0.356428
																																					-3.97441			0.35136
																																					-3.9605			0.346325
																																					-3.94659			0.341325
																																					-3.93268			0.336359
																																					-3.91877			0.33143
																																					-3.90487			0.326537
																																					-3.89096			0.321682
																																					-3.87705			0.316864
																																					-3.86314			0.312086
																																					-3.84923			0.307348
																																					-3.83532			0.30265
																																					-3.82142			0.297992
																																					-3.80751			0.293376
																																					-3.7936			0.288803
																																					-3.77969			0.284272
																																					-3.76578			0.279784
																																					-3.75187			0.275339
																																					-3.73796			0.270939
																																					-3.72406			0.266583
																																					-3.71015			0.262272
																																					-3.69624			0.258006
																																					-3.68233			0.253786
																																					-3.66842			0.249611
																																					-3.65451			0.245483
																																					-3.64061			0.241401
																																					-3.6267			0.237365
																																					-3.61279			0.233376
