# Supplementary material for: A simplified characterization of S-adenosyl-l-methionine-consuming enzymes with 1-Step EZ-MTase: a universal and straightforward coupled-assay for in vitro and in vivo setting
Source: Royal Society of Chemistry journal article supplement (doi:10.1039/c7sc02830j), 2017-01-01
Supplement: c7sc02830j5.xlsx [file c7sc02830j5.xlsx]

## Sheet: INSTRUCTIONS
	My 1-STEP EZ-MTase ASSAY
	Establish your experimental conditions (e.g. buffer, pH, MTase and other additives' concentrations) using worksheet "Experiment Conditions".
	Once your kinetics are complete, insert your experimental data within worksheet "Plate Reader Data".
	Within worksheet "Coupling Enzyme Parameters", input the pH at which your experiments were performed.
	You will also need to identify the methyl donor you selected for your experiments (SAM, 8-aza-SAM).
	Finally, determine initial velocities and GNMT activity using worksheet "My 1-Step EZ-MTase RESULTS".
	Data in this file are pertinent to GNMT activity within liver extract sample

## Sheet: Experiment Conditions
My 1-Step EZ-MTase Assay
Experimental set-up and data analysis made easy.
Determine: GNMT Activity (pmol min-1 mg-1) within liver extract samples.
Prepare the 300 mL solutions then transfer 250 mL in a UV-star 96-well flat bottom plate (Greiner Bio One, #655801).
NOTE:		Volumes from 5-30 mL of extract are sufficient to detect GNMT activity within liver samples.
		All reactions are performed with 75 mM SAM and 20 mM Glycine.
															Final Reaction	300	mL	MASTER MIX for		10	Reactions
		Reagents								#1	#2	#3	#4		Final in well	250	mL				STOCK		FINAL		Volume (mL)
Step 1		WATER								47.2309	41.2309	35.2309	29.2309					Phosphate (pH 8.00)			200	mM	75	mM	1125
Step 2		MASTER MIX								231.769	231.769	231.769	231.769					Glycerol			80	%	10	%	375
Step 3		Liver Extract								6	12	18	24					bME			100	mM	5	mM	150
Step 4		Glycine (stock at 400 mM; starts the reaction)								15	15	15	15					GSH (200 mM)			200	mM	2.5	mM	37.5
																		TM0936 (48.1 mM)			48.1	mM	4	mM	249.48
Total Protein concentration in extract (mg mL-1)										5.36								SAM			591	mM	75	mM	380.711
																						Per reaction:			231.769	mL
	NOTE:		Cells in GREEN are ACTIVE and MUST be filed by user.

## Sheet: Plate Reader Data
My 1-Step EZ-MTase Assay *** Data Input ***
For each well, your plate reader recorded absorbance values. Absorbance was measured every T second over an extanded period of time.
Step 1:	Please enter the interval T (in second) within the ORANGE cell.							Your Liver Extract Volume is placed within the PINK cells.
				Step 2:	Copy/Paste, within GREEN cells, the plate reader values for MTase experiments (Meas).
				NOTE:	RED cells are not to be modified.
interval T (s)		Time (min)	Liver Extract (mL)	6		12		18		24
				Meas		Meas		Meas		Meas
4		0		1.0373	1392.58	1.2109	1625.63	1.3966	1874.94	1.5855	2128.53
		0.0666667		1.0338	1387.88	1.2129	1628.32	1.3972	1875.74	1.5865	2129.88
		0.133333		1.0375	1392.84	1.2071	1620.53	1.395	1872.79	1.5847	2127.46
Optical Factor correction to a LIGHT PATH of 10 mm using the PLATE #655801 and 250 mL per well.		0.2		1.0377	1393.11	1.2081	1621.87	1.3967	1875.07	1.5893	2133.64
		0.266667		1.037	1392.17	1.2093	1623.49	1.396	1874.13	1.5858	2128.94
		0.333333		1.0337	1387.74	1.2097	1624.02	1.3987	1877.75	1.5861	2129.34
		0.4		1.0368	1391.9	1.2075	1621.07	1.3982	1877.08	1.5896	2134.04
		0.466667		1.0375	1392.84	1.2069	1620.26	1.3964	1874.67	1.5877	2131.49
		0.533333		1.035	1389.49	1.2078	1621.47	1.3958	1873.86	1.5865	2129.88
		0.6		1.0358	1390.56	1.2104	1624.96	1.3958	1873.86	1.5886	2132.7
		0.666667		1.0369	1392.04	1.2124	1627.65	1.3943	1871.85	1.5855	2128.53
		0.733333		1.0378	1393.25	1.2086	1622.55	1.3996	1878.96	1.5876	2131.35
1.3425		0.8		1.0353	1389.89	1.2115	1626.44	1.3994	1878.69	1.5918	2136.99
		0.866667		1.035	1389.49	1.2107	1625.36	1.4003	1879.9	1.5906	2135.38
		0.933333		1.0363	1391.23	1.2111	1625.9	1.4043	1885.27	1.5898	2134.31
		1		1.0347	1389.08	1.2084	1622.28	1.4018	1881.92	1.5889	2133.1
		1.06667		1.0358	1390.56	1.211	1625.77	1.3948	1872.52	1.5902	2134.84
		1.13333		1.0364	1391.37	1.2142	1630.06	1.4011	1880.98	1.5913	2136.32
		1.2		1.039	1394.86	1.209	1623.08	1.3974	1876.01	1.5893	2133.64
		1.26667		1.038	1393.52	1.2102	1624.69	1.3955	1873.46	1.5887	2132.83
		1.33333		1.037	1392.17	1.2116	1626.57	1.4062	1887.82	1.5905	2135.25
		1.4		1.0362	1391.1	1.2149	1631	1.3987	1877.75	1.5973	2144.38
		1.46667		1.0373	1392.58	1.2113	1626.17	1.4002	1879.77	1.5907	2135.51
		1.53333		1.036	1390.83	1.2102	1624.69	1.4022	1882.45	1.5924	2137.8
		1.6		1.0382	1393.78	1.2105	1625.1	1.3995	1878.83	1.5896	2134.04
		1.66667		1.0371	1392.31	1.2121	1627.24	1.3997	1879.1	1.5878	2131.62
		1.73333		1.0375	1392.84	1.213	1628.45	1.3986	1877.62	1.5935	2139.27
		1.8		1.041	1397.54	1.2118	1626.84	1.4001	1879.63	1.5902	2134.84
		1.86667		1.0401	1396.33	1.2087	1622.68	1.3973	1875.88	1.5941	2140.08
		1.93333		1.0383	1393.92	1.2115	1626.44	1.3987	1877.75	1.5876	2131.35
		2		1.0355	1390.16	1.2116	1626.57	1.4012	1881.11	1.5942	2140.21
		2.06667		1.0402	1396.47	1.2118	1626.84	1.4026	1882.99	1.594	2139.95
		2.13333		1.0362	1391.1	1.2099	1624.29	1.4003	1879.9	1.5915	2136.59
		2.2		1.0362	1391.1	1.2106	1625.23	1.4022	1882.45	1.593	2138.6
		2.26667		1.0383	1393.92	1.2124	1627.65	1.3994	1878.69	1.5953	2141.69
		2.33333		1.0413	1397.95	1.2123	1627.51	1.4007	1880.44	1.5935	2139.27
		2.4		1.0357	1390.43	1.2145	1630.47	1.4038	1884.6	1.5906	2135.38
		2.46667		1.0386	1394.32	1.2119	1626.98	1.3985	1877.49	1.5927	2138.2
		2.53333		1.0403	1396.6	1.2122	1627.38	1.4023	1882.59	1.5904	2135.11
		2.6		1.0401	1396.33	1.2132	1628.72	1.4001	1879.63	1.5945	2140.62
		2.66667		1.0378	1393.25	1.2175	1634.49	1.4025	1882.86	1.5956	2142.09
		2.73333		1.0406	1397.01	1.2111	1625.9	1.4002	1879.77	1.5963	2143.03
		2.8		1.0408	1397.27	1.2114	1626.3	1.4032	1883.8	1.5939	2139.81
		2.86667		1.0361	1390.96	1.2123	1627.51	1.3979	1876.68	1.593	2138.6
		2.93333		1.0362	1391.1	1.2139	1629.66	1.4027	1883.12	1.5914	2136.45
		3		1.0377	1393.11	1.2092	1623.35	1.4022	1882.45	1.5906	2135.38
		3.06667		1.0363	1391.23	1.2109	1625.63	1.4027	1883.12	1.5975	2144.64
		3.13333		1.0398	1395.93	1.213	1628.45	1.4011	1880.98	1.5966	2143.44
		3.2		1.0372	1392.44	1.2101	1624.56	1.4009	1880.71	1.5928	2138.33
		3.26667		1.039	1394.86	1.2126	1627.92	1.4032	1883.8	1.5954	2141.82
		3.33333		1.0413	1397.95	1.2135	1629.12	1.4007	1880.44	1.5969	2143.84
		3.4		1.0385	1394.19	1.2121	1627.24	1.403	1883.53	1.5972	2144.24
		3.46667		1.0374	1392.71	1.2155	1631.81	1.4	1879.5	1.5946	2140.75
		3.53333		1.038	1393.52	1.2143	1630.2	1.4024	1882.72	1.5972	2144.24
		3.6		1.0384	1394.05	1.2201	1637.98	1.405	1886.21	1.5945	2140.62
		3.66667		1.0429	1400.09	1.2137	1629.39	1.4056	1887.02	1.5951	2141.42
		3.73333		1.0366	1391.64	1.215	1631.14	1.4006	1880.31	1.5949	2141.15
		3.8		1.0377	1393.11	1.2118	1626.84	1.4015	1881.51	1.5953	2141.69
		3.86667		1.0349	1389.35	1.2152	1631.41	1.4081	1890.37	1.599	2146.66
		3.93333		1.0366	1391.64	1.2121	1627.24	1.4001	1879.63	1.5991	2146.79
		4		1.0366	1391.64	1.212	1627.11	1.4031	1883.66	1.5982	2145.58
		4.06667		1.0378	1393.25	1.2127	1628.05	1.4055	1886.88	1.5996	2147.46
		4.13333		1.0375	1392.84	1.2154	1631.67	1.4033	1883.93	1.5998	2147.73
		4.2		1.0381	1393.65	1.2156	1631.94	1.4048	1885.94	1.5966	2143.44
		4.26667		1.0378	1393.25	1.2139	1629.66	1.4028	1883.26	1.5966	2143.44
		4.33333		1.0404	1396.74	1.2114	1626.3	1.4044	1885.41	1.599	2146.66
		4.4		1.0396	1395.66	1.2138	1629.53	1.4032	1883.8	1.596	2142.63
		4.46667		1.0381	1393.65	1.2129	1628.32	1.4034	1884.06	1.598	2145.32
		4.53333		1.0366	1391.64	1.2137	1629.39	1.4023	1882.59	1.5948	2141.02
		4.6		1.0385	1394.19	1.2148	1630.87	1.4065	1888.23	1.6013	2149.75
		4.66667		1.0426	1399.69	1.2138	1629.53	1.404	1884.87	1.5952	2141.56
		4.73333		1.0404	1396.74	1.2158	1632.21	1.4051	1886.35	1.5972	2144.24
		4.8		1.0384	1394.05	1.2146	1630.6	1.4044	1885.41	1.6004	2148.54
		4.86667		1.0379	1393.38	1.2097	1624.02	1.4036	1884.33	1.5971	2144.11
		4.93333		1.0404	1396.74	1.2184	1635.7	1.4072	1889.17	1.5949	2141.15
		5		1.0402	1396.47	1.2191	1636.64	1.4022	1882.45	1.5983	2145.72
		5.06667		1.0419	1398.75	1.2141	1629.93	1.4052	1886.48	1.601	2149.34
		5.13333		1.042	1398.88	1.2127	1628.05	1.4053	1886.62	1.5993	2147.06
		5.2		1.0381	1393.65	1.2135	1629.12	1.4044	1885.41	1.6032	2152.3
		5.26667		1.0389	1394.72	1.212	1627.11	1.4054	1886.75	1.5981	2145.45
		5.33333		1.0393	1395.26	1.2119	1626.98	1.4071	1889.03	1.5987	2146.25
		5.4		1.0404	1396.74	1.2121	1627.24	1.402	1882.18	1.5991	2146.79
		5.46667		1.0378	1393.25	1.2161	1632.61	1.406	1887.56	1.5991	2146.79
		5.53333		1.0367	1391.77	1.2113	1626.17	1.4067	1888.49	1.5989	2146.52
		5.6		1.0397	1395.8	1.2128	1628.18	1.4028	1883.26	1.5995	2147.33
		5.66667		1.0399	1396.07	1.2138	1629.53	1.406	1887.56	1.5987	2146.25
		5.73333		1.0372	1392.44	1.2142	1630.06	1.4035	1884.2	1.6022	2150.95
		5.8		1.038	1393.52	1.2152	1631.41	1.4076	1889.7	1.5996	2147.46
		5.86667		1.0353	1389.89	1.2144	1630.33	1.4045	1885.54	1.5959	2142.5
		5.93333		1.0364	1391.37	1.2209	1639.06	1.4071	1889.03	1.6021	2150.82
		6		1.0406	1397.01	1.214	1629.8	1.4032	1883.8	1.6002	2148.27
		6.06667		1.0395	1395.53	1.2136	1629.26	1.4061	1887.69	1.6051	2154.85
		6.13333		1.0383	1393.92	1.2111	1625.9	1.4056	1887.02	1.6014	2149.88
		6.2		1.0394	1395.39	1.2147	1630.73	1.4063	1887.96	1.6026	2151.49
		6.26667		1.0379	1393.38	1.2159	1632.35	1.4071	1889.03	1.6009	2149.21
		6.33333		1.038	1393.52	1.2131	1628.59	1.4074	1889.43	1.6025	2151.36
		6.4		1.0395	1395.53	1.2114	1626.3	1.4069	1888.76	1.606	2156.05
		6.46667		1.0368	1391.9	1.2131	1628.59	1.4077	1889.84	1.6003	2148.4
		6.53333		1.0383	1393.92	1.2139	1629.66	1.4059	1887.42	1.6039	2153.24
		6.6		1.0379	1393.38	1.2134	1628.99	1.4084	1890.78	1.6043	2153.77
		6.66667		1.0391	1394.99	1.2152	1631.41	1.4051	1886.35	1.6024	2151.22
		6.73333		1.0361	1390.96	1.2126	1627.92	1.4082	1890.51	1.6013	2149.75
		6.8		1.0367	1391.77	1.2141	1629.93	1.4039	1884.74	1.6005	2148.67
		6.86667		1.0391	1394.99	1.2114	1626.3	1.4043	1885.27	1.6039	2153.24
		6.93333		1.0402	1396.47	1.2125	1627.78	1.4102	1893.19	1.6018	2150.42
		7		1.0367	1391.77	1.2137	1629.39	1.4061	1887.69	1.6027	2151.62
		7.06667		1.0365	1391.5	1.213	1628.45	1.4046	1885.68	1.6017	2150.28
		7.13333		1.0399	1396.07	1.2154	1631.67	1.4037	1884.47	1.6024	2151.22
		7.2		1.0344	1388.68	1.2147	1630.73	1.4047	1885.81	1.6045	2154.04
		7.26667		1.0394	1395.39	1.2124	1627.65	1.4073	1889.3	1.5993	2147.06
		7.33333		1.0391	1394.99	1.2133	1628.86	1.4051	1886.35	1.6002	2148.27
		7.4		1.04	1396.2	1.2149	1631	1.404	1884.87	1.5998	2147.73
		7.46667		1.0342	1388.41	1.2118	1626.84	1.4088	1891.31	1.6037	2152.97
		7.53333		1.0412	1397.81	1.2117	1626.71	1.41	1892.92	1.6052	2154.98
		7.6		1.0417	1398.48	1.2137	1629.39	1.4059	1887.42	1.6042	2153.64
		7.66667		1.0377	1393.11	1.2155	1631.81	1.409	1891.58	1.6028	2151.76
		7.73333		1.038	1393.52	1.2166	1633.29	1.406	1887.56	1.6018	2150.42
		7.8		1.038	1393.52	1.2158	1632.21	1.4064	1888.09	1.606	2156.05
		7.86667		1.0409	1397.41	1.2138	1629.53	1.4054	1886.75	1.601	2149.34
		7.93333		1.0377	1393.11	1.2141	1629.93	1.4054	1886.75	1.6054	2155.25
		8		1.0401	1396.33	1.2134	1628.99	1.4096	1892.39	1.605	2154.71
		8.06667		1.0383	1393.92	1.2185	1635.84	1.405	1886.21	1.6043	2153.77
		8.13333		1.0378	1393.25	1.2159	1632.35	1.4055	1886.88	1.6055	2155.38
		8.2		1.0378	1393.25	1.2165	1633.15	1.4031	1883.66	1.6024	2151.22
		8.26667		1.0377	1393.11	1.215	1631.14	1.4073	1889.3	1.6048	2154.44
		8.33333		1.0386	1394.32	1.2116	1626.57	1.4081	1890.37	1.6051	2154.85
		8.4		1.0381	1393.65	1.2161	1632.61	1.4081	1890.37	1.6006	2148.81
		8.46667		1.0373	1392.58	1.2132	1628.72	1.4051	1886.35	1.604	2153.37
		8.53333		1.0389	1394.72	1.2104	1624.96	1.4108	1894	1.6014	2149.88
		8.6		1.0412	1397.81	1.2111	1625.9	1.407	1888.9	1.6007	2148.94
		8.66667		1.0394	1395.39	1.2156	1631.94	1.4123	1896.01	1.5984	2145.85
		8.73333		1.0395	1395.53	1.2148	1630.87	1.4043	1885.27	1.6016	2150.15
		8.8		1.0371	1392.31	1.2181	1635.3	1.4077	1889.84	1.6034	2152.56
		8.86667		1.0369	1392.04	1.2156	1631.94	1.408	1890.24	1.6033	2152.43
		8.93333		1.0373	1392.58	1.2144	1630.33	1.4069	1888.76	1.6013	2149.75
		9		1.0377	1393.11	1.2148	1630.87	1.4064	1888.09	1.6033	2152.43
		9.06667		1.0398	1395.93	1.216	1632.48	1.4092	1891.85	1.6047	2154.31
		9.13333		1.037	1392.17	1.2147	1630.73	1.4084	1890.78	1.6046	2154.18
		9.2		1.0377	1393.11	1.2155	1631.81	1.4083	1890.64	1.6029	2151.89
		9.26667		1.0374	1392.71	1.2167	1633.42	1.4058	1887.29	1.6027	2151.62
		9.33333		1.038	1393.52	1.216	1632.48	1.4073	1889.3	1.6045	2154.04
		9.4		1.0387	1394.45	1.2133	1628.86	1.4039	1884.74	1.6026	2151.49
		9.46667		1.0413	1397.95	1.2153	1631.54	1.4053	1886.62	1.6035	2152.7
		9.53333		1.0398	1395.93	1.214	1629.8	1.4073	1889.3	1.6062	2156.32
		9.6		1.0377	1393.11	1.2107	1625.36	1.4087	1891.18	1.6009	2149.21
		9.66667		1.0394	1395.39	1.2141	1629.93	1.4071	1889.03	1.6038	2153.1
		9.73333		1.0356	1390.29	1.2155	1631.81	1.4051	1886.35	1.607	2157.4
		9.8		1.0357	1390.43	1.2127	1628.05	1.4098	1892.66	1.6058	2155.79
		9.86667		1.0406	1397.01	1.2148	1630.87	1.4048	1885.94	1.6005	2148.67
		9.93333		1.0363	1391.23	1.2117	1626.71	1.4106	1893.73	1.6026	2151.49
		10		1.0396	1395.66	1.2126	1627.92	1.4101	1893.06	1.6118	2163.84
		10.0667		1.0396	1395.66	1.2151	1631.27	1.4086	1891.05	1.6053	2155.12
		10.1333		1.043	1400.23	1.2122	1627.38	1.405	1886.21	1.6068	2157.13
		10.2		1.0375	1392.84	1.2137	1629.39	1.4102	1893.19	1.6026	2151.49
		10.2667		1.0367	1391.77	1.2165	1633.15	1.4069	1888.76	1.6039	2153.24
		10.3333		1.0413	1397.95	1.2143	1630.2	1.4079	1890.11	1.6055	2155.38
		10.4		1.0382	1393.78	1.2118	1626.84	1.4077	1889.84	1.6048	2154.44
		10.4667		1.0386	1394.32	1.2148	1630.87	1.4078	1889.97	1.6039	2153.24
		10.5333		1.0379	1393.38	1.2133	1628.86	1.4045	1885.54	1.6027	2151.62
		10.6		1.0376	1392.98	1.2126	1627.92	1.4043	1885.27	1.6073	2157.8
		10.6667		1.04	1396.2	1.2119	1626.98	1.4077	1889.84	1.6036	2152.83
		10.7333		1.0359	1390.7	1.2137	1629.39	1.407	1888.9	1.6044	2153.91
		10.8		1.0386	1394.32	1.2144	1630.33	1.4094	1892.12	1.6011	2149.48
		10.8667		1.0383	1393.92	1.2141	1629.93	1.409	1891.58	1.6026	2151.49
		10.9333		1.0366	1391.64	1.2108	1625.5	1.4077	1889.84	1.6054	2155.25
		11		1.034	1388.14	1.2148	1630.87	1.4085	1890.91	1.6054	2155.25
		11.0667		1.0363	1391.23	1.2137	1629.39	1.4081	1890.37	1.6091	2160.22
		11.1333		1.039	1394.86	1.2147	1630.73	1.4094	1892.12	1.602	2150.68
		11.2		1.0395	1395.53	1.2129	1628.32	1.4102	1893.19	1.6021	2150.82
		11.2667		1.0367	1391.77	1.2161	1632.61	1.4121	1895.74	1.6054	2155.25
		11.3333		1.0385	1394.19	1.2084	1622.28	1.4053	1886.62	1.6047	2154.31
		11.4		1.0376	1392.98	1.2112	1626.04	1.4123	1896.01	1.6055	2155.38
		11.4667		1.0377	1393.11	1.2154	1631.67	1.4071	1889.03	1.6041	2153.5
		11.5333		1.0375	1392.84	1.2141	1629.93	1.4066	1888.36	1.6054	2155.25
		11.6		1.0373	1392.58	1.2139	1629.66	1.4091	1891.72	1.6057	2155.65
		11.6667		1.0379	1393.38	1.2132	1628.72	1.4101	1893.06	1.6036	2152.83
		11.7333		1.0373	1392.58	1.2133	1628.86	1.4087	1891.18	1.6031	2152.16
		11.8		1.0359	1390.7	1.213	1628.45	1.4079	1890.11	1.6032	2152.3
		11.8667		1.0387	1394.45	1.2125	1627.78	1.4077	1889.84	1.6051	2154.85
		11.9333		1.0373	1392.58	1.2135	1629.12	1.4078	1889.97	1.603	2152.03
		12		1.0409	1397.41	1.2132	1628.72	1.4106	1893.73	1.6018	2150.42
		12.0667		1.0398	1395.93	1.2132	1628.72	1.4043	1885.27	1.6078	2158.47
		12.1333		1.0367	1391.77	1.2164	1633.02	1.4077	1889.84	1.6057	2155.65
		12.2		1.035	1389.49	1.2152	1631.41	1.4088	1891.31	1.6059	2155.92
		12.2667		1.0361	1390.96	1.2111	1625.9	1.411	1894.27	1.6061	2156.19
		12.3333		1.0366	1391.64	1.2138	1629.53	1.41	1892.92	1.6028	2151.76
		12.4		1.0355	1390.16	1.2128	1628.18	1.4076	1889.7	1.6064	2156.59
		12.4667		1.0381	1393.65	1.2132	1628.72	1.4087	1891.18	1.6036	2152.83
		12.5333		1.0389	1394.72	1.2124	1627.65	1.4089	1891.45	1.6055	2155.38
		12.6		1.0381	1393.65	1.2114	1626.3	1.4079	1890.11	1.6029	2151.89
		12.6667		1.0363	1391.23	1.2102	1624.69	1.4102	1893.19	1.605	2154.71
		12.7333		1.0381	1393.65	1.2151	1631.27	1.4105	1893.6	1.6056	2155.52
		12.8		1.0371	1392.31	1.2138	1629.53	1.4102	1893.19	1.6045	2154.04
		12.8667		1.0352	1389.76	1.2184	1635.7	1.407	1888.9	1.6025	2151.36
		12.9333		1.0365	1391.5	1.2151	1631.27	1.4093	1891.99	1.6061	2156.19
		13		1.0365	1391.5	1.2133	1628.86	1.4078	1889.97	1.6048	2154.44
		13.0667		1.0357	1390.43	1.2128	1628.18	1.4099	1892.79	1.6052	2154.98
		13.1333		1.0353	1389.89	1.2134	1628.99	1.408	1890.24	1.6054	2155.25
		13.2		1.0394	1395.39	1.213	1628.45	1.4064	1888.09	1.6002	2148.27
		13.2667		1.0346	1388.95	1.2133	1628.86	1.4077	1889.84	1.605	2154.71
		13.3333		1.0401	1396.33	1.2137	1629.39	1.4076	1889.7	1.6048	2154.44
		13.4		1.0384	1394.05	1.2155	1631.81	1.408	1890.24	1.6031	2152.16
		13.4667		1.0345	1388.82	1.2119	1626.98	1.4048	1885.94	1.6041	2153.5
		13.5333		1.0375	1392.84	1.2135	1629.12	1.4109	1894.13	1.6066	2156.86
		13.6		1.0358	1390.56	1.218	1635.16	1.4087	1891.18	1.6031	2152.16
		13.6667		1.0348	1389.22	1.2156	1631.94	1.407	1888.9	1.6064	2156.59
		13.7333		1.0355	1390.16	1.2144	1630.33	1.4083	1890.64	1.6061	2156.19
		13.8		1.036	1390.83	1.2152	1631.41	1.4064	1888.09	1.6064	2156.59
		13.8667		1.0357	1390.43	1.212	1627.11	1.4114	1894.8	1.6054	2155.25
		13.9333		1.0352	1389.76	1.2126	1627.92	1.4095	1892.25	1.6091	2160.22
		14		1.0339	1388.01	1.2122	1627.38	1.4086	1891.05	1.6032	2152.3
		14.0667		1.0381	1393.65	1.2125	1627.78	1.4092	1891.85	1.6058	2155.79
		14.1333		1.0346	1388.95	1.2123	1627.51	1.4095	1892.25	1.6046	2154.18
		14.2		1.0362	1391.1	1.2126	1627.92	1.4064	1888.09	1.6031	2152.16
		14.2667		1.0362	1391.1	1.2143	1630.2	1.4105	1893.6	1.5996	2147.46
		14.3333		1.0363	1391.23	1.2134	1628.99	1.4079	1890.11	1.6077	2158.34
		14.4		1.0379	1393.38	1.2164	1633.02	1.4081	1890.37	1.6068	2157.13
		14.4667		1.0347	1389.08	1.2122	1627.38	1.4112	1894.54	1.6018	2150.42
		14.5333		1.0351	1389.62	1.2148	1630.87	1.4094	1892.12	1.6085	2159.41
		14.6		1.0346	1388.95	1.2146	1630.6	1.4094	1892.12	1.6076	2158.2
		14.6667		1.0383	1393.92	1.2138	1629.53	1.4098	1892.66	1.6031	2152.16
		14.7333		1.0363	1391.23	1.2148	1630.87	1.4084	1890.78	1.606	2156.05
		14.8		1.0384	1394.05	1.2142	1630.06	1.4092	1891.85	1.6045	2154.04
		14.8667		1.0351	1389.62	1.2135	1629.12	1.4077	1889.84	1.6024	2151.22
		14.9333		1.0373	1392.58	1.2143	1630.2	1.408	1890.24	1.6079	2158.61
		15		1.0363	1391.23	1.2125	1627.78	1.4081	1890.37	1.6069	2157.26
		15.0667		1.0368	1391.9	1.2142	1630.06	1.4108	1894	1.6058	2155.79
		15.1333		1.0379	1393.38	1.2166	1633.29	1.4104	1893.46	1.6052	2154.98
		15.2		1.0352	1389.76	1.2128	1628.18	1.4073	1889.3	1.6048	2154.44
		15.2667		1.0353	1389.89	1.2138	1629.53	1.4114	1894.8	1.6022	2150.95
		15.3333		1.036	1390.83	1.212	1627.11	1.41	1892.92	1.606	2156.05
		15.4		1.037	1392.17	1.2138	1629.53	1.4073	1889.3	1.606	2156.05
		15.4667		1.0383	1393.92	1.2181	1635.3	1.4104	1893.46	1.6039	2153.24
		15.5333		1.035	1389.49	1.21	1624.42	1.4082	1890.51	1.6047	2154.31
		15.6		1.0345	1388.82	1.2134	1628.99	1.4088	1891.31	1.6069	2157.26
		15.6667		1.0358	1390.56	1.2122	1627.38	1.4091	1891.72	1.6031	2152.16
		15.7333		1.0333	1387.21	1.2123	1627.51	1.4101	1893.06	1.6049	2154.58
		15.8		1.0362	1391.1	1.2126	1627.92	1.4115	1894.94	1.6034	2152.56
		15.8667		1.0329	1386.67	1.2156	1631.94	1.4106	1893.73	1.6042	2153.64
		15.9333		1.0355	1390.16	1.212	1627.11	1.4082	1890.51	1.6053	2155.12
		16		1.0343	1388.55	1.2114	1626.3	1.4068	1888.63	1.6032	2152.3
		16.0667		1.0352	1389.76	1.2115	1626.44	1.4106	1893.73	1.6031	2152.16
		16.1333		1.0361	1390.96	1.2125	1627.78	1.4111	1894.4	1.6064	2156.59
		16.2		1.0378	1393.25	1.2114	1626.3	1.4115	1894.94	1.6066	2156.86
		16.2667		1.0395	1395.53	1.2125	1627.78	1.408	1890.24	1.606	2156.05
		16.3333		1.0368	1391.9	1.2146	1630.6	1.41	1892.92	1.6011	2149.48
		16.4		1.0346	1388.95	1.2155	1631.81	1.4104	1893.46	1.6046	2154.18
		16.4667		1.037	1392.17	1.2146	1630.6	1.4101	1893.06	1.6059	2155.92
		16.5333		1.0356	1390.29	1.2144	1630.33	1.4101	1893.06	1.6073	2157.8
		16.6		1.0344	1388.68	1.2131	1628.59	1.4086	1891.05	1.6031	2152.16
		16.6667		1.0339	1388.01	1.2111	1625.9	1.4116	1895.07	1.6059	2155.92
		16.7333		1.0358	1390.56	1.2152	1631.41	1.405	1886.21	1.6045	2154.04
		16.8		1.0365	1391.5	1.2125	1627.78	1.4061	1887.69	1.6034	2152.56
		16.8667		1.0382	1393.78	1.2146	1630.6	1.4124	1896.15	1.6048	2154.44
		16.9333		1.0331	1386.94	1.213	1628.45	1.4106	1893.73	1.6015	2150.01
		17		1.0331	1386.94	1.2141	1629.93	1.4092	1891.85	1.6036	2152.83
		17.0667		1.0337	1387.74	1.2128	1628.18	1.4061	1887.69	1.5999	2147.87
		17.1333		1.0356	1390.29	1.2163	1632.88	1.4099	1892.79	1.6028	2151.76
		17.2		1.0323	1385.86	1.2119	1626.98	1.4088	1891.31	1.6044	2153.91
		17.2667		1.0375	1392.84	1.2123	1627.51	1.4057	1887.15	1.607	2157.4
		17.3333		1.0386	1394.32	1.2117	1626.71	1.4073	1889.3	1.6056	2155.52
		17.4		1.0356	1390.29	1.211	1625.77	1.4086	1891.05	1.6047	2154.31
		17.4667		1.0374	1392.71	1.2144	1630.33	1.4047	1885.81	1.6039	2153.24
		17.5333		1.0329	1386.67	1.2126	1627.92	1.4073	1889.3	1.6038	2153.1
		17.6		1.0335	1387.47	1.2113	1626.17	1.4091	1891.72	1.609	2160.08
		17.6667		1.036	1390.83	1.2151	1631.27	1.405	1886.21	1.6059	2155.92
		17.7333		1.0335	1387.47	1.2148	1630.87	1.406	1887.56	1.6046	2154.18
		17.8		1.0352	1389.76	1.2129	1628.32	1.4086	1891.05	1.6024	2151.22
		17.8667		1.0364	1391.37	1.2145	1630.47	1.4117	1895.21	1.6034	2152.56
		17.9333		1.0335	1387.47	1.2159	1632.35	1.4079	1890.11	1.6089	2159.95
		18		1.0347	1389.08	1.2106	1625.23	1.4101	1893.06	1.6058	2155.79
		18.0667		1.035	1389.49	1.2117	1626.71	1.4096	1892.39	1.6014	2149.88
		18.1333		1.0345	1388.82	1.2147	1630.73	1.4056	1887.02	1.6033	2152.43
		18.2		1.0381	1393.65	1.2137	1629.39	1.4109	1894.13	1.6051	2154.85
		18.2667		1.0361	1390.96	1.2135	1629.12	1.4064	1888.09	1.6079	2158.61
		18.3333		1.0337	1387.74	1.214	1629.8	1.4097	1892.52	1.6073	2157.8
		18.4		1.0359	1390.7	1.2111	1625.9	1.409	1891.58	1.6012	2149.61
		18.4667		1.0349	1389.35	1.215	1631.14	1.4089	1891.45	1.6064	2156.59
		18.5333		1.0375	1392.84	1.214	1629.8	1.4087	1891.18	1.6041	2153.5
		18.6		1.037	1392.17	1.2124	1627.65	1.4085	1890.91	1.6011	2149.48
		18.6667		1.0328	1386.53	1.2131	1628.59	1.4087	1891.18	1.607	2157.4
		18.7333		1.0342	1388.41	1.2115	1626.44	1.4083	1890.64	1.6009	2149.21
		18.8		1.0341	1388.28	1.2101	1624.56	1.4104	1893.46	1.6039	2153.24
		18.8667		1.0334	1387.34	1.2137	1629.39	1.4088	1891.31	1.6051	2154.85
		18.9333		1.0339	1388.01	1.2105	1625.1	1.4072	1889.17	1.601	2149.34
		19		1.0333	1387.21	1.214	1629.8	1.4079	1890.11	1.6043	2153.77
		19.0667		1.0356	1390.29	1.2125	1627.78	1.409	1891.58	1.6022	2150.95
		19.1333		1.0354	1390.02	1.2128	1628.18	1.4086	1891.05	1.6056	2155.52
		19.2		1.0337	1387.74	1.2112	1626.04	1.4096	1892.39	1.6014	2149.88
		19.2667		1.0352	1389.76	1.2161	1632.61	1.4046	1885.68	1.6051	2154.85
		19.3333		1.0357	1390.43	1.2123	1627.51	1.407	1888.9	1.603	2152.03
		19.4		1.0346	1388.95	1.2179	1635.03	1.4077	1889.84	1.6079	2158.61
		19.4667		1.0323	1385.86	1.2163	1632.88	1.4088	1891.31	1.6047	2154.31
		19.5333		1.0338	1387.88	1.2142	1630.06	1.4075	1889.57	1.6027	2151.62
		19.6		1.0389	1394.72	1.2126	1627.92	1.4074	1889.43	1.6028	2151.76
		19.6667		1.0341	1388.28	1.2127	1628.05	1.4076	1889.7	1.6063	2156.46
		19.7333		1.0345	1388.82	1.213	1628.45	1.4097	1892.52	1.6042	2153.64
		19.8		1.0362	1391.1	1.2133	1628.86	1.4091	1891.72	1.6065	2156.73
		19.8667		1.0374	1392.71	1.2153	1631.54	1.408	1890.24	1.6033	2152.43
		19.9333		1.0344	1388.68	1.2123	1627.51	1.4047	1885.81	1.6044	2153.91
		20		1.0342	1388.41	1.2139	1629.66	1.4111	1894.4	1.6058	2155.79
		20.0667		1.0351	1389.62	1.2121	1627.24	1.4068	1888.63	1.6027	2151.62
		20.1333		1.0351	1389.62	1.2129	1628.32	1.4088	1891.31	1.6049	2154.58
		20.2		1.0326	1386.27	1.2101	1624.56	1.4072	1889.17	1.6052	2154.98
		20.2667		1.0345	1388.82	1.2121	1627.24	1.4069	1888.76	1.6061	2156.19
		20.3333		1.0356	1390.29	1.2118	1626.84	1.4089	1891.45	1.605	2154.71
		20.4		1.0385	1394.19	1.216	1632.48	1.4069	1888.76	1.6052	2154.98
		20.4667		1.0324	1386	1.2091	1623.22	1.4093	1891.99	1.6031	2152.16
		20.5333		1.0355	1390.16	1.2153	1631.54	1.4077	1889.84	1.602	2150.68
		20.6		1.03	1382.78	1.2119	1626.98	1.4041	1885	1.6038	2153.1
		20.6667		1.0338	1387.88	1.212	1627.11	1.4069	1888.76	1.603	2152.03
		20.7333		1.0398	1395.93	1.2104	1624.96	1.4082	1890.51	1.5993	2147.06
		20.8		1.036	1390.83	1.2091	1623.22	1.4047	1885.81	1.6046	2154.18
		20.8667		1.0346	1388.95	1.2128	1628.18	1.4076	1889.7	1.611	2162.77
		20.9333		1.0367	1391.77	1.2117	1626.71	1.4052	1886.48	1.6035	2152.7
		21		1.0347	1389.08	1.2119	1626.98	1.4101	1893.06	1.6045	2154.04
		21.0667		1.0357	1390.43	1.2097	1624.02	1.407	1888.9	1.6048	2154.44
		21.1333		1.0359	1390.7	1.2116	1626.57	1.4076	1889.7	1.6058	2155.79
		21.2		1.0334	1387.34	1.2131	1628.59	1.4044	1885.41	1.6061	2156.19
		21.2667		1.0341	1388.28	1.2133	1628.86	1.4077	1889.84	1.6021	2150.82
		21.3333		1.0375	1392.84	1.2147	1630.73	1.4082	1890.51	1.6055	2155.38
		21.4		1.0339	1388.01	1.212	1627.11	1.4021	1882.32	1.6053	2155.12
		21.4667		1.0327	1386.4	1.2131	1628.59	1.4071	1889.03	1.6043	2153.77
		21.5333		1.0361	1390.96	1.2138	1629.53	1.4057	1887.15	1.6029	2151.89
		21.6		1.0344	1388.68	1.2115	1626.44	1.409	1891.58	1.6012	2149.61
		21.6667		1.0333	1387.21	1.2095	1623.75	1.4067	1888.49	1.6018	2150.42
		21.7333		1.0334	1387.34	1.213	1628.45	1.4072	1889.17	1.6026	2151.49
		21.8		1.033	1386.8	1.2117	1626.71	1.4099	1892.79	1.6044	2153.91
		21.8667		1.0327	1386.4	1.2098	1624.16	1.4045	1885.54	1.6025	2151.36
		21.9333		1.0356	1390.29	1.2115	1626.44	1.4104	1893.46	1.5979	2145.18
		22		1.0338	1387.88	1.2125	1627.78	1.4098	1892.66	1.6037	2152.97
		22.0667		1.0308	1383.85	1.2099	1624.29	1.4052	1886.48	1.6031	2152.16
		22.1333		1.0364	1391.37	1.2101	1624.56	1.4047	1885.81	1.602	2150.68
		22.2		1.0348	1389.22	1.213	1628.45	1.41	1892.92	1.6022	2150.95
		22.2667		1.0363	1391.23	1.2078	1621.47	1.4095	1892.25	1.6031	2152.16
		22.3333		1.0347	1389.08	1.2085	1622.41	1.4078	1889.97	1.6044	2153.91
		22.4		1.0351	1389.62	1.2142	1630.06	1.4089	1891.45	1.6058	2155.79
		22.4667		1.0371	1392.31	1.2102	1624.69	1.4052	1886.48	1.6034	2152.56
		22.5333		1.0335	1387.47	1.2129	1628.32	1.4062	1887.82	1.607	2157.4
		22.6		1.036	1390.83	1.2133	1628.86	1.4068	1888.63	1.6011	2149.48
		22.6667		1.0327	1386.4	1.2156	1631.94	1.4085	1890.91	1.6028	2151.76
		22.7333		1.0362	1391.1	1.212	1627.11	1.409	1891.58	1.6059	2155.92
		22.8		1.0311	1384.25	1.2137	1629.39	1.4057	1887.15	1.6036	2152.83
		22.8667		1.0338	1387.88	1.213	1628.45	1.4086	1891.05	1.6021	2150.82
		22.9333		1.0366	1391.64	1.216	1632.48	1.4074	1889.43	1.5987	2146.25
		23		1.0361	1390.96	1.2145	1630.47	1.4039	1884.74	1.6003	2148.4
		23.0667		1.0371	1392.31	1.2126	1627.92	1.4064	1888.09	1.6025	2151.36
		23.1333		1.0343	1388.55	1.2097	1624.02	1.4078	1889.97	1.6058	2155.79
		23.2		1.032	1385.46	1.2159	1632.35	1.407	1888.9	1.6042	2153.64
		23.2667		1.0345	1388.82	1.213	1628.45	1.4075	1889.57	1.6004	2148.54
		23.3333		1.0351	1389.62	1.2106	1625.23	1.4081	1890.37	1.6039	2153.24
		23.4		1.0344	1388.68	1.2091	1623.22	1.4084	1890.78	1.6035	2152.7
		23.4667		1.0339	1388.01	1.2124	1627.65	1.4066	1888.36	1.6053	2155.12
		23.5333		1.0325	1386.13	1.2108	1625.5	1.4051	1886.35	1.6012	2149.61
		23.6		1.0338	1387.88	1.2131	1628.59	1.4086	1891.05	1.6042	2153.64
		23.6667		1.0328	1386.53	1.2129	1628.32	1.4062	1887.82	1.6026	2151.49
		23.7333		1.0348	1389.22	1.2092	1623.35	1.4027	1883.12	1.6001	2148.13
		23.8		1.0343	1388.55	1.2109	1625.63	1.4054	1886.75	1.6029	2151.89
		23.8667		1.0362	1391.1	1.2101	1624.56	1.4082	1890.51	1.6017	2150.28
		23.9333		1.0322	1385.73	1.2101	1624.56	1.4098	1892.66	1.6021	2150.82
		24		1.0328	1386.53	1.211	1625.77	1.4046	1885.68	1.6012	2149.61
		24.0667		1.0332	1387.07	1.2113	1626.17	1.4085	1890.91	1.6001	2148.13
		24.1333		1.0344	1388.68	1.2091	1623.22	1.4022	1882.45	1.6014	2149.88
		24.2		1.0324	1386	1.2122	1627.38	1.4053	1886.62	1.602	2150.68
		24.2667		1.0325	1386.13	1.2106	1625.23	1.4036	1884.33	1.6065	2156.73
		24.3333		1.0354	1390.02	1.2099	1624.29	1.4061	1887.69	1.6002	2148.27
		24.4		1.0355	1390.16	1.2103	1624.83	1.4067	1888.49	1.604	2153.37
		24.4667		1.0356	1390.29	1.2101	1624.56	1.4067	1888.49	1.5996	2147.46
		24.5333		1.0321	1385.59	1.2117	1626.71	1.4052	1886.48	1.6039	2153.24
		24.6		1.0356	1390.29	1.2105	1625.1	1.4067	1888.49	1.6016	2150.15
		24.6667		1.0338	1387.88	1.2127	1628.05	1.4062	1887.82	1.6002	2148.27
		24.7333		1.0357	1390.43	1.2108	1625.5	1.4038	1884.6	1.6048	2154.44
		24.8		1.0345	1388.82	1.2114	1626.3	1.4076	1889.7	1.6029	2151.89
		24.8667		1.0368	1391.9	1.2131	1628.59	1.4046	1885.68	1.6005	2148.67
		24.9333		1.0335	1387.47	1.2114	1626.3	1.4041	1885	1.6009	2149.21
		25		1.0346	1388.95	1.2126	1627.92	1.4076	1889.7	1.6021	2150.82
		25.0667		1.035	1389.49	1.2139	1629.66	1.4045	1885.54	1.5985	2145.99
		25.1333		1.0344	1388.68	1.2137	1629.39	1.4086	1891.05	1.6037	2152.97
		25.2		1.0365	1391.5	1.2136	1629.26	1.405	1886.21	1.6011	2149.48
		25.2667		1.033	1386.8	1.2101	1624.56	1.4072	1889.17	1.5991	2146.79
		25.3333		1.0351	1389.62	1.2124	1627.65	1.4068	1888.63	1.6025	2151.36
		25.4		1.0345	1388.82	1.2123	1627.51	1.4073	1889.3	1.6044	2153.91
		25.4667		1.0332	1387.07	1.2112	1626.04	1.4056	1887.02	1.6027	2151.62
		25.5333		1.0333	1387.21	1.2136	1629.26	1.4061	1887.69	1.6015	2150.01
		25.6		1.0343	1388.55	1.2122	1627.38	1.4054	1886.75	1.6024	2151.22
		25.6667		1.0321	1385.59	1.2118	1626.84	1.4033	1883.93	1.6012	2149.61
		25.7333		1.0332	1387.07	1.2103	1624.83	1.4045	1885.54	1.6002	2148.27
		25.8		1.0338	1387.88	1.2097	1624.02	1.4092	1891.85	1.6032	2152.3
		25.8667		1.0337	1387.74	1.2094	1623.62	1.4045	1885.54	1.6003	2148.4
		25.9333		1.0331	1386.94	1.2105	1625.1	1.4067	1888.49	1.5996	2147.46
		26		1.0347	1389.08	1.2098	1624.16	1.4064	1888.09	1.601	2149.34
		26.0667		1.0336	1387.61	1.2097	1624.02	1.4056	1887.02	1.6022	2150.95
		26.1333		1.0337	1387.74	1.2103	1624.83	1.407	1888.9	1.6041	2153.5
		26.2		1.0353	1389.89	1.2091	1623.22	1.4035	1884.2	1.6007	2148.94
		26.2667		1.0342	1388.41	1.2097	1624.02	1.4077	1889.84	1.6021	2150.82
		26.3333		1.0333	1387.21	1.2083	1622.14	1.4055	1886.88	1.601	2149.34
		26.4		1.0355	1390.16	1.2118	1626.84	1.4068	1888.63	1.601	2149.34
		26.4667		1.0328	1386.53	1.2112	1626.04	1.4069	1888.76	1.6031	2152.16
		26.5333		1.0338	1387.88	1.2115	1626.44	1.4052	1886.48	1.6009	2149.21
		26.6		1.033	1386.8	1.2126	1627.92	1.408	1890.24	1.6031	2152.16
		26.6667		1.0368	1391.9	1.2112	1626.04	1.4059	1887.42	1.5989	2146.52
		26.7333		1.0336	1387.61	1.2121	1627.24	1.4051	1886.35	1.6018	2150.42
		26.8		1.0341	1388.28	1.2073	1620.8	1.4052	1886.48	1.5977	2144.91
		26.8667		1.0337	1387.74	1.2117	1626.71	1.4071	1889.03	1.5972	2144.24
		26.9333		1.0324	1386	1.2127	1628.05	1.4064	1888.09	1.6021	2150.82
		27		1.0308	1383.85	1.2125	1627.78	1.4078	1889.97	1.6026	2151.49
		27.0667		1.032	1385.46	1.2106	1625.23	1.4061	1887.69	1.5996	2147.46
		27.1333		1.035	1389.49	1.2136	1629.26	1.4029	1883.39	1.6	2148
		27.2		1.0336	1387.61	1.2089	1622.95	1.4062	1887.82	1.6008	2149.07
		27.2667		1.032	1385.46	1.2111	1625.9	1.4043	1885.27	1.6	2148
		27.3333		1.0345	1388.82	1.2104	1624.96	1.405	1886.21	1.5973	2144.38
		27.4		1.031	1384.12	1.2105	1625.1	1.4052	1886.48	1.6005	2148.67
		27.4667		1.0319	1385.33	1.2098	1624.16	1.4058	1887.29	1.6017	2150.28
		27.5333		1.0299	1382.64	1.2101	1624.56	1.401	1880.84	1.6009	2149.21
		27.6		1.033	1386.8	1.2067	1619.99	1.4074	1889.43	1.5981	2145.45
		27.6667		1.0341	1388.28	1.2103	1624.83	1.4042	1885.14	1.6015	2150.01
		27.7333		1.0327	1386.4	1.2101	1624.56	1.4074	1889.43	1.601	2149.34
		27.8		1.0354	1390.02	1.2116	1626.57	1.4097	1892.52	1.5989	2146.52
		27.8667		1.0331	1386.94	1.2087	1622.68	1.4041	1885	1.5996	2147.46
		27.9333		1.036	1390.83	1.2083	1622.14	1.4016	1881.65	1.5997	2147.6
		28		1.0338	1387.88	1.2129	1628.32	1.4034	1884.06	1.5989	2146.52
		28.0667		1.035	1389.49	1.2114	1626.3	1.4036	1884.33	1.5992	2146.93
		28.1333		1.0341	1388.28	1.2097	1624.02	1.4047	1885.81	1.5988	2146.39
		28.2		1.0329	1386.67	1.2101	1624.56	1.4077	1889.84	1.598	2145.32
		28.2667		1.0334	1387.34	1.2067	1619.99	1.4043	1885.27	1.6013	2149.75
		28.3333		1.0318	1385.19	1.21	1624.42	1.4059	1887.42	1.6006	2148.81
		28.4		1.0326	1386.27	1.2107	1625.36	1.4009	1880.71	1.6005	2148.67
		28.4667		1.0316	1384.92	1.2126	1627.92	1.4043	1885.27	1.5985	2145.99
		28.5333		1.0332	1387.07	1.2084	1622.28	1.4058	1887.29	1.5977	2144.91
		28.6		1.0348	1389.22	1.2127	1628.05	1.4009	1880.71	1.5992	2146.93
		28.6667		1.0334	1387.34	1.2092	1623.35	1.4034	1884.06	1.6033	2152.43
		28.7333		1.0353	1389.89	1.2135	1629.12	1.4085	1890.91	1.6059	2155.92
		28.8		1.0314	1384.65	1.2099	1624.29	1.4078	1889.97	1.602	2150.68
		28.8667		1.032	1385.46	1.2127	1628.05	1.404	1884.87	1.5989	2146.52
		28.9333		1.0353	1389.89	1.209	1623.08	1.4079	1890.11	1.5982	2145.58
		29		1.0344	1388.68	1.2101	1624.56	1.4049	1886.08	1.6015	2150.01
		29.0667		1.0313	1384.52	1.2083	1622.14	1.4075	1889.57	1.5984	2145.85
		29.1333		1.0327	1386.4	1.2087	1622.68	1.4061	1887.69	1.5976	2144.78
		29.2		1.0323	1385.86	1.209	1623.08	1.4038	1884.6	1.5996	2147.46
		29.2667		1.0339	1388.01	1.212	1627.11	1.4064	1888.09	1.6031	2152.16
		29.3333		1.0342	1388.41	1.2078	1621.47	1.407	1888.9	1.6008	2149.07
		29.4		1.0342	1388.41	1.2126	1627.92	1.407	1888.9	1.6004	2148.54
		29.4667		1.0364	1391.37	1.2123	1627.51	1.4076	1889.7	1.6004	2148.54
		29.5333		1.0331	1386.94	1.2099	1624.29	1.4043	1885.27	1.6028	2151.76
		29.6		1.0316	1384.92	1.2085	1622.41	1.4045	1885.54	1.5999	2147.87
		29.6667		1.0321	1385.59	1.2114	1626.3	1.4071	1889.03	1.6006	2148.81
		29.7333		1.0348	1389.22	1.209	1623.08	1.4047	1885.81	1.6007	2148.94
		29.8		1.0319	1385.33	1.2116	1626.57	1.4042	1885.14	1.6012	2149.61
		29.8667		1.0336	1387.61	1.21	1624.42	1.4062	1887.82	1.6041	2153.5
		29.9333		1.0314	1384.65	1.2104	1624.96	1.4028	1883.26	1.599	2146.66
		30		1.0318	1385.19	1.2102	1624.69	1.4044	1885.41	1.6006	2148.81
		30.0667		1.0353	1389.89	1.2095	1623.75	1.4042	1885.14	1.5978	2145.05
		30.1333		1.0341	1388.28	1.214	1629.8	1.4035	1884.2	1.599	2146.66
		30.2		1.0339	1388.01	1.2093	1623.49	1.4056	1887.02	1.6004	2148.54
		30.2667		1.0332	1387.07	1.2119	1626.98	1.4053	1886.62	1.5998	2147.73
		30.3333		1.0324	1386	1.2088	1622.81	1.4027	1883.12	1.6001	2148.13
		30.4		1.0326	1386.27	1.2118	1626.84	1.4047	1885.81	1.5983	2145.72
		30.4667		1.0326	1386.27	1.2086	1622.55	1.4018	1881.92	1.6008	2149.07
		30.5333		1.037	1392.17	1.2095	1623.75	1.4037	1884.47	1.5981	2145.45
		30.6		1.0319	1385.33	1.2074	1620.93	1.4055	1886.88	1.5961	2142.76
		30.6667		1.0351	1389.62	1.2072	1620.67	1.4049	1886.08	1.5995	2147.33
		30.7333		1.0338	1387.88	1.2067	1619.99	1.4003	1879.9	1.5968	2143.7
		30.8		1.0329	1386.67	1.2072	1620.67	1.4052	1886.48	1.5969	2143.84
		30.8667		1.0342	1388.41	1.2133	1628.86	1.4043	1885.27	1.6	2148
		30.9333		1.0346	1388.95	1.2095	1623.75	1.4079	1890.11	1.6013	2149.75
		31		1.0314	1384.65	1.2087	1622.68	1.4033	1883.93	1.6005	2148.67
		31.0667		1.0345	1388.82	1.2082	1622.01	1.403	1883.53	1.606	2156.05
		31.1333		1.0329	1386.67	1.211	1625.77	1.408	1890.24	1.5998	2147.73
		31.2		1.0318	1385.19	1.2077	1621.34	1.4067	1888.49	1.6013	2149.75
		31.2667		1.0353	1389.89	1.2103	1624.83	1.402	1882.18	1.5988	2146.39
		31.3333		1.031	1384.12	1.2116	1626.57	1.4054	1886.75	1.6007	2148.94
		31.4		1.0342	1388.41	1.2085	1622.41	1.4037	1884.47	1.5972	2144.24
		31.4667		1.0337	1387.74	1.2089	1622.95	1.4041	1885	1.6016	2150.15
		31.5333		1.034	1388.14	1.212	1627.11	1.4056	1887.02	1.6007	2148.94
		31.6		1.0328	1386.53	1.2095	1623.75	1.4023	1882.59	1.6014	2149.88
		31.6667		1.0323	1385.86	1.2098	1624.16	1.4034	1884.06	1.5992	2146.93
		31.7333		1.0328	1386.53	1.212	1627.11	1.4033	1883.93	1.6017	2150.28
		31.8		1.0322	1385.73	1.2084	1622.28	1.4014	1881.38	1.6041	2153.5
		31.8667		1.0333	1387.21	1.2067	1619.99	1.4	1879.5	1.5994	2147.19
		31.9333		1.0312	1384.39	1.2089	1622.95	1.4015	1881.51	1.5987	2146.25
		32		1.0324	1386	1.2092	1623.35	1.4028	1883.26	1.5982	2145.58
		32.0667		1.0346	1388.95	1.2089	1622.95	1.4051	1886.35	1.5993	2147.06
		32.1333		1.0321	1385.59	1.2118	1626.84	1.4027	1883.12	1.5982	2145.58
		32.2		1.0338	1387.88	1.2076	1621.2	1.4052	1886.48	1.5958	2142.36
		32.2667		1.0345	1388.82	1.211	1625.77	1.4023	1882.59	1.5945	2140.62
		32.3333		1.0325	1386.13	1.2115	1626.44	1.4035	1884.2	1.6015	2150.01
		32.4		1.0329	1386.67	1.209	1623.08	1.4046	1885.68	1.6005	2148.67
		32.4667		1.0324	1386	1.2108	1625.5	1.4051	1886.35	1.6016	2150.15
		32.5333		1.0352	1389.76	1.2084	1622.28	1.4034	1884.06	1.5975	2144.64
		32.6		1.0315	1384.79	1.211	1625.77	1.4012	1881.11	1.5984	2145.85
		32.6667		1.0314	1384.65	1.2096	1623.89	1.4041	1885	1.5978	2145.05
		32.7333		1.0319	1385.33	1.2082	1622.01	1.4052	1886.48	1.5943	2140.35
		32.8		1.0328	1386.53	1.2103	1624.83	1.403	1883.53	1.5985	2145.99
		32.8667		1.0316	1384.92	1.2112	1626.04	1.4016	1881.65	1.5988	2146.39
		32.9333		1.0324	1386	1.2096	1623.89	1.4042	1885.14	1.6004	2148.54
		33		1.034	1388.14	1.2086	1622.55	1.4055	1886.88	1.6004	2148.54
		33.0667		1.0294	1381.97	1.2109	1625.63	1.4027	1883.12	1.5964	2143.17
		33.1333		1.031	1384.12	1.2088	1622.81	1.4042	1885.14	1.595	2141.29
		33.2		1.0315	1384.79	1.2085	1622.41	1.404	1884.87	1.5962	2142.9
		33.2667		1.0326	1386.27	1.2101	1624.56	1.4008	1880.57	1.5976	2144.78
		33.3333		1.0321	1385.59	1.2063	1619.46	1.404	1884.87	1.599	2146.66
		33.4		1.0345	1388.82	1.2113	1626.17	1.402	1882.18	1.6011	2149.48
		33.4667		1.0306	1383.58	1.2105	1625.1	1.405	1886.21	1.5986	2146.12
		33.5333		1.0333	1387.21	1.2074	1620.93	1.4004	1880.04	1.6014	2149.88
		33.6		1.0321	1385.59	1.2085	1622.41	1.4048	1885.94	1.5974	2144.51
		33.6667		1.0322	1385.73	1.2077	1621.34	1.4023	1882.59	1.5953	2141.69
		33.7333		1.0319	1385.33	1.2137	1629.39	1.4045	1885.54	1.5995	2147.33
		33.8		1.03	1382.78	1.2111	1625.9	1.4027	1883.12	1.5995	2147.33
		33.8667		1.0322	1385.73	1.2109	1625.63	1.4023	1882.59	1.5996	2147.46
		33.9333		1.033	1386.8	1.2107	1625.36	1.4038	1884.6	1.5976	2144.78
		34		1.0319	1385.33	1.2083	1622.14	1.4048	1885.94	1.5975	2144.64
		34.0667		1.0325	1386.13	1.2108	1625.5	1.4018	1881.92	1.595	2141.29
		34.1333		1.0312	1384.39	1.2107	1625.36	1.4029	1883.39	1.5989	2146.52
		34.2		1.0339	1388.01	1.2079	1621.61	1.4032	1883.8	1.5969	2143.84
		34.2667		1.0318	1385.19	1.2096	1623.89	1.4007	1880.44	1.5968	2143.7
		34.3333		1.0333	1387.21	1.2093	1623.49	1.4059	1887.42	1.5981	2145.45
		34.4		1.0332	1387.07	1.2102	1624.69	1.4018	1881.92	1.5967	2143.57
		34.4667		1.0319	1385.33	1.2093	1623.49	1.4035	1884.2	1.5981	2145.45
		34.5333		1.029	1381.43	1.2086	1622.55	1.3999	1879.37	1.6002	2148.27
		34.6		1.0319	1385.33	1.2113	1626.17	1.4014	1881.38	1.5982	2145.58
		34.6667		1.0331	1386.94	1.207	1620.4	1.405	1886.21	1.6018	2150.42
		34.7333		1.0324	1386	1.2096	1623.89	1.4014	1881.38	1.6021	2150.82
		34.8		1.0362	1391.1	1.2098	1624.16	1.4003	1879.9	1.5989	2146.52
		34.8667		1.0334	1387.34	1.21	1624.42	1.401	1880.84	1.5945	2140.62
		34.9333		1.0315	1384.79	1.2059	1618.92	1.404	1884.87	1.5934	2139.14
		35		1.0314	1384.65	1.21	1624.42	1.4023	1882.59	1.5988	2146.39
		35.0667		1.0343	1388.55	1.2065	1619.73	1.4029	1883.39	1.5991	2146.79
		35.1333		1.0362	1391.1	1.2097	1624.02	1.4028	1883.26	1.6024	2151.22
		35.2		1.0328	1386.53	1.207	1620.4	1.4014	1881.38	1.598	2145.32
		35.2667		1.0328	1386.53	1.2096	1623.89	1.4029	1883.39	1.599	2146.66
		35.3333		1.0317	1385.06	1.2089	1622.95	1.4036	1884.33	1.5954	2141.82
		35.4		1.0349	1389.35	1.2094	1623.62	1.4013	1881.25	1.5958	2142.36
		35.4667		1.0331	1386.94	1.2107	1625.36	1.4017	1881.78	1.5973	2144.38
		35.5333		1.0317	1385.06	1.2111	1625.9	1.4025	1882.86	1.5969	2143.84
		35.6		1.0324	1386	1.2065	1619.73	1.3993	1878.56	1.5956	2142.09
		35.6667		1.031	1384.12	1.2074	1620.93	1.4015	1881.51	1.5967	2143.57
		35.7333		1.0323	1385.86	1.2089	1622.95	1.3986	1877.62	1.5964	2143.17
		35.8		1.0325	1386.13	1.2125	1627.78	1.4013	1881.25	1.5987	2146.25
		35.8667		1.0339	1388.01	1.2096	1623.89	1.4028	1883.26	1.5995	2147.33
		35.9333		1.0319	1385.33	1.2082	1622.01	1.4021	1882.32	1.5971	2144.11
		36		1.0331	1386.94	1.2071	1620.53	1.4008	1880.57	1.5984	2145.85
		36.0667		1.0308	1383.85	1.2082	1622.01	1.4024	1882.72	1.5975	2144.64
		36.1333		1.032	1385.46	1.2085	1622.41	1.4006	1880.31	1.5978	2145.05
		36.2		1.0314	1384.65	1.208	1621.74	1.401	1880.84	1.5943	2140.35
		36.2667		1.0321	1385.59	1.2083	1622.14	1.3987	1877.75	1.5957	2142.23
		36.3333		1.0348	1389.22	1.2103	1624.83	1.4	1879.5	1.5973	2144.38
		36.4		1.0299	1382.64	1.2105	1625.1	1.3999	1879.37	1.5998	2147.73
		36.4667		1.0349	1389.35	1.2073	1620.8	1.4017	1881.78	1.5946	2140.75
		36.5333		1.0348	1389.22	1.2066	1619.86	1.4012	1881.11	1.5974	2144.51
		36.6		1.0319	1385.33	1.211	1625.77	1.4042	1885.14	1.5929	2138.47
		36.6667		1.0296	1382.24	1.2069	1620.26	1.4025	1882.86	1.5964	2143.17
		36.7333		1.0328	1386.53	1.208	1621.74	1.4018	1881.92	1.5969	2143.84
		36.8		1.0281	1380.22	1.208	1621.74	1.4051	1886.35	1.5982	2145.58
		36.8667		1.0324	1386	1.2071	1620.53	1.4006	1880.31	1.596	2142.63
		36.9333		1.0322	1385.73	1.2088	1622.81	1.4031	1883.66	1.5981	2145.45
		37		1.0307	1383.71	1.2066	1619.86	1.4037	1884.47	1.6039	2153.24
		37.0667		1.0317	1385.06	1.2056	1618.52	1.4025	1882.86	1.5906	2135.38
		37.1333		1.0336	1387.61	1.2085	1622.41	1.4035	1884.2	1.5961	2142.76
		37.2		1.0312	1384.39	1.2056	1618.52	1.4007	1880.44	1.5964	2143.17
		37.2667		1.0327	1386.4	1.2074	1620.93	1.4022	1882.45	1.5977	2144.91
		37.3333		1.0344	1388.68	1.209	1623.08	1.3996	1878.96	1.5973	2144.38
		37.4		1.0309	1383.98	1.2074	1620.93	1.4	1879.5	1.5982	2145.58
		37.4667		1.0308	1383.85	1.2109	1625.63	1.399	1878.16	1.5953	2141.69
		37.5333		1.0335	1387.47	1.2046	1617.18	1.3997	1879.1	1.5981	2145.45
		37.6		1.0334	1387.34	1.2062	1619.32	1.4015	1881.51	1.596	2142.63
		37.6667		1.0316	1384.92	1.2078	1621.47	1.3993	1878.56	1.5929	2138.47
		37.7333		1.029	1381.43	1.2073	1620.8	1.4018	1881.92	1.5931	2138.74
		37.8		1.0361	1390.96	1.2081	1621.87	1.4038	1884.6	1.5938	2139.68
		37.8667		1.0323	1385.86	1.2074	1620.93	1.4011	1880.98	1.5961	2142.76
		37.9333		1.0314	1384.65	1.2087	1622.68	1.403	1883.53	1.595	2141.29
		38		1.0302	1383.04	1.2054	1618.25	1.3987	1877.75	1.5979	2145.18
		38.0667		1.0293	1381.84	1.2122	1627.38	1.4001	1879.63	1.5951	2141.42
		38.1333		1.034	1388.14	1.2083	1622.14	1.4004	1880.04	1.5972	2144.24
		38.2		1.0308	1383.85	1.2087	1622.68	1.4027	1883.12	1.596	2142.63
		38.2667		1.0308	1383.85	1.2071	1620.53	1.3994	1878.69	1.5976	2144.78
		38.3333		1.0311	1384.25	1.2068	1620.13	1.4025	1882.86	1.5947	2140.88
		38.4		1.0332	1387.07	1.2067	1619.99	1.4049	1886.08	1.5998	2147.73
		38.4667		1.0298	1382.51	1.2075	1621.07	1.3992	1878.43	1.5963	2143.03
		38.5333		1.0309	1383.98	1.2101	1624.56	1.3992	1878.43	1.5955	2141.96
		38.6		1.0341	1388.28	1.2097	1624.02	1.3994	1878.69	1.5966	2143.44
		38.6667		1.0346	1388.95	1.2091	1623.22	1.4017	1881.78	1.5988	2146.39
		38.7333		1.0297	1382.37	1.2079	1621.61	1.4012	1881.11	1.5923	2137.66
		38.8		1.0307	1383.71	1.2078	1621.47	1.399	1878.16	1.5978	2145.05
		38.8667		1.0326	1386.27	1.2068	1620.13	1.4016	1881.65	1.5942	2140.21
		38.9333		1.0343	1388.55	1.2066	1619.86	1.4004	1880.04	1.6005	2148.67
		39		1.0317	1385.06	1.2087	1622.68	1.3983	1877.22	1.5993	2147.06
		39.0667		1.0317	1385.06	1.2094	1623.62	1.3979	1876.68	1.5977	2144.91
		39.1333		1.032	1385.46	1.2062	1619.32	1.4003	1879.9	1.5962	2142.9
		39.2		1.0303	1383.18	1.2051	1617.85	1.4025	1882.86	1.6002	2148.27
		39.2667		1.0291	1381.57	1.2071	1620.53	1.3999	1879.37	1.5942	2140.21
		39.3333		1.0314	1384.65	1.2059	1618.92	1.4017	1881.78	1.5923	2137.66
		39.4		1.0335	1387.47	1.2077	1621.34	1.3982	1877.08	1.5942	2140.21
		39.4667		1.0316	1384.92	1.2079	1621.61	1.3989	1878.02	1.5947	2140.88
		39.5333		1.032	1385.46	1.2053	1618.12	1.3989	1878.02	1.5976	2144.78
		39.6		1.0326	1386.27	1.2071	1620.53	1.4003	1879.9	1.5932	2138.87
		39.6667		1.0309	1383.98	1.2068	1620.13	1.4003	1879.9	1.5953	2141.69
		39.7333		1.0312	1384.39	1.2069	1620.26	1.3984	1877.35	1.5955	2141.96
		39.8		1.0322	1385.73	1.2104	1624.96	1.3999	1879.37	1.5952	2141.56
		39.8667		1.0292	1381.7	1.2094	1623.62	1.4014	1881.38	1.5935	2139.27
		39.9333		1.0341	1388.28	1.2063	1619.46	1.3995	1878.83	1.6	2148
		40		1.0317	1385.06	1.2083	1622.14	1.4003	1879.9	1.594	2139.95
		40.0667		1.0301	1382.91	1.2083	1622.14	1.4006	1880.31	1.598	2145.32
		40.1333		1.0301	1382.91	1.2066	1619.86	1.3971	1875.61	1.5945	2140.62
		40.2		1.0291	1381.57	1.2077	1621.34	1.4031	1883.66	1.5975	2144.64
		40.2667		1.0296	1382.24	1.2069	1620.26	1.3986	1877.62	1.595	2141.29
		40.3333		1.0323	1385.86	1.2068	1620.13	1.4017	1881.78	1.594	2139.95
		40.4		1.0323	1385.86	1.2089	1622.95	1.4	1879.5	1.5924	2137.8
		40.4667		1.0324	1386	1.2055	1618.38	1.4009	1880.71	1.5934	2139.14
		40.5333		1.0336	1387.61	1.2074	1620.93	1.3997	1879.1	1.5949	2141.15
		40.6		1.0325	1386.13	1.2049	1617.58	1.3998	1879.23	1.5938	2139.68
		40.6667		1.027	1378.75	1.2082	1622.01	1.3997	1879.1	1.593	2138.6
		40.7333		1.0314	1384.65	1.2076	1621.2	1.4061	1887.69	1.5958	2142.36
		40.8		1.0296	1382.24	1.2077	1621.34	1.3997	1879.1	1.5953	2141.69
		40.8667		1.0293	1381.84	1.2081	1621.87	1.3992	1878.43	1.5931	2138.74
		40.9333		1.0311	1384.25	1.205	1617.71	1.3995	1878.83	1.5948	2141.02
		41		1.0321	1385.59	1.2068	1620.13	1.3989	1878.02	1.5954	2141.82
		41.0667		1.0312	1384.39	1.2073	1620.8	1.3975	1876.14	1.5935	2139.27
		41.1333		1.0308	1383.85	1.2064	1619.59	1.4004	1880.04	1.5939	2139.81
		41.2		1.0293	1381.84	1.2065	1619.73	1.4007	1880.44	1.5891	2133.37
		41.2667		1.0295	1382.1	1.2057	1618.65	1.4034	1884.06	1.5943	2140.35
		41.3333		1.0315	1384.79	1.2099	1624.29	1.4021	1882.32	1.5934	2139.14
		41.4		1.0306	1383.58	1.2064	1619.59	1.4002	1879.77	1.5933	2139.01
		41.4667		1.0321	1385.59	1.2075	1621.07	1.3982	1877.08	1.5979	2145.18
		41.5333		1.029	1381.43	1.2053	1618.12	1.3994	1878.69	1.5955	2141.96
		41.6		1.0288	1381.16	1.2051	1617.85	1.3993	1878.56	1.5943	2140.35
		41.6667		1.0313	1384.52	1.2085	1622.41	1.3974	1876.01	1.5957	2142.23
		41.7333		1.032	1385.46	1.2066	1619.86	1.3965	1874.8	1.5911	2136.05
		41.8		1.0303	1383.18	1.2066	1619.86	1.4014	1881.38	1.5937	2139.54
		41.8667		1.0312	1384.39	1.2064	1619.59	1.4009	1880.71	1.5955	2141.96
		41.9333		1.0297	1382.37	1.206	1619.06	1.3999	1879.37	1.5937	2139.54
		42		1.0322	1385.73	1.2053	1618.12	1.3986	1877.62	1.5925	2137.93
		42.0667		1.0316	1384.92	1.2076	1621.2	1.3993	1878.56	1.5942	2140.21
		42.1333		1.0327	1386.4	1.2056	1618.52	1.4019	1882.05	1.5927	2138.2
		42.2		1.0308	1383.85	1.207	1620.4	1.3972	1875.74	1.5973	2144.38
		42.2667		1.031	1384.12	1.2039	1616.24	1.3992	1878.43	1.5941	2140.08
		42.3333		1.0322	1385.73	1.2081	1621.87	1.4012	1881.11	1.5959	2142.5
		42.4		1.031	1384.12	1.2036	1615.83	1.3991	1878.29	1.5918	2136.99
		42.4667		1.0323	1385.86	1.2041	1616.5	1.4002	1879.77	1.5947	2140.88
		42.5333		1.034	1388.14	1.2052	1617.98	1.3981	1876.95	1.5919	2137.13
		42.6		1.0328	1386.53	1.21	1624.42	1.4025	1882.86	1.5901	2134.71
		42.6667		1.0329	1386.67	1.2037	1615.97	1.3974	1876.01	1.5914	2136.45
		42.7333		1.0327	1386.4	1.2055	1618.38	1.3999	1879.37	1.594	2139.95
		42.8		1.031	1384.12	1.206	1619.06	1.4002	1879.77	1.5964	2143.17
		42.8667		1.028	1380.09	1.204	1616.37	1.3993	1878.56	1.5938	2139.68
		42.9333		1.0297	1382.37	1.205	1617.71	1.3991	1878.29	1.5911	2136.05
		43		1.0303	1383.18	1.206	1619.06	1.3984	1877.35	1.5948	2141.02
		43.0667		1.0312	1384.39	1.2063	1619.46	1.3963	1874.53	1.5904	2135.11
		43.1333		1.0299	1382.64	1.2047	1617.31	1.3988	1877.89	1.5937	2139.54
		43.2		1.0325	1386.13	1.208	1621.74	1.3977	1876.41	1.5931	2138.74
		43.2667		1.0306	1383.58	1.2056	1618.52	1.3974	1876.01	1.5945	2140.62
		43.3333		1.0301	1382.91	1.2082	1622.01	1.3981	1876.95	1.5971	2144.11
		43.4		1.0331	1386.94	1.2049	1617.58	1.3956	1873.59	1.5889	2133.1
		43.4667		1.0303	1383.18	1.206	1619.06	1.4	1879.5	1.5889	2133.1
		43.5333		1.0282	1380.36	1.2093	1623.49	1.4006	1880.31	1.5944	2140.48
		43.6		1.0329	1386.67	1.2043	1616.77	1.4016	1881.65	1.5932	2138.87
		43.6667		1.0313	1384.52	1.2071	1620.53	1.398	1876.82	1.5907	2135.51
		43.7333		1.0287	1381.03	1.2049	1617.58	1.3972	1875.74	1.5923	2137.66
		43.8		1.0303	1383.18	1.2059	1618.92	1.3991	1878.29	1.5905	2135.25
		43.8667		1.0319	1385.33	1.2073	1620.8	1.4023	1882.59	1.5912	2136.19
		43.9333		1.0313	1384.52	1.2043	1616.77	1.3964	1874.67	1.5892	2133.5
		44		1.0285	1380.76	1.2045	1617.04	1.3966	1874.94	1.5946	2140.75
		44.0667		1.0306	1383.58	1.2047	1617.31	1.3993	1878.56	1.5906	2135.38
		44.1333		1.0302	1383.04	1.2081	1621.87	1.3984	1877.35	1.5927	2138.2
		44.2		1.0318	1385.19	1.2051	1617.85	1.3992	1878.43	1.5947	2140.88
		44.2667		1.029	1381.43	1.2058	1618.79	1.3989	1878.02	1.5925	2137.93
		44.3333		1.0291	1381.57	1.2076	1621.2	1.3969	1875.34	1.5915	2136.59
		44.4		1.0303	1383.18	1.2084	1622.28	1.3973	1875.88	1.5931	2138.74
		44.4667		1.0313	1384.52	1.2055	1618.38	1.4017	1881.78	1.5949	2141.15
		44.5333		1.0325	1386.13	1.2057	1618.65	1.3984	1877.35	1.5941	2140.08
		44.6		1.0332	1387.07	1.2048	1617.44	1.4012	1881.11	1.5951	2141.42
		44.6667		1.0281	1380.22	1.2061	1619.19	1.3955	1873.46	1.5921	2137.39
		44.7333		1.0297	1382.37	1.2046	1617.18	1.3997	1879.1	1.5935	2139.27
		44.8		1.029	1381.43	1.2062	1619.32	1.3993	1878.56	1.5909	2135.78
		44.8667		1.0272	1379.02	1.2023	1614.09	1.3976	1876.28	1.5968	2143.7
		44.9333		1.031	1384.12	1.2046	1617.18	1.3987	1877.75	1.5961	2142.76
		45		1.0301	1382.91	1.2056	1618.52	1.3987	1877.75	1.5928	2138.33
		45.0667		1.0287	1381.03	1.2051	1617.85	1.3995	1878.83	1.5924	2137.8
		45.1333		1.0315	1384.79	1.2074	1620.93	1.3997	1879.1	1.5928	2138.33
		45.2		1.0317	1385.06	1.2039	1616.24	1.3951	1872.92	1.5897	2134.17
		45.2667		1.0295	1382.1	1.2055	1618.38	1.3975	1876.14	1.5904	2135.11
		45.3333		1.0313	1384.52	1.2065	1619.73	1.4005	1880.17	1.592	2137.26
		45.4		1.0321	1385.59	1.2051	1617.85	1.3948	1872.52	1.5899	2134.44
		45.4667		1.031	1384.12	1.2053	1618.12	1.3933	1870.51	1.5908	2135.65
		45.5333		1.0331	1386.94	1.2043	1616.77	1.3964	1874.67	1.5929	2138.47
		45.6		1.03	1382.78	1.2042	1616.64	1.396	1874.13	1.5923	2137.66
		45.6667		1.0305	1383.45	1.2079	1621.61	1.3953	1873.19	1.5934	2139.14
		45.7333		1.0299	1382.64	1.2071	1620.53	1.3931	1870.24	1.594	2139.95
		45.8		1.0304	1383.31	1.2066	1619.86	1.3978	1876.55	1.5949	2141.15
		45.8667		1.029	1381.43	1.2049	1617.58	1.398	1876.82	1.5884	2132.43
		45.9333		1.0284	1380.63	1.2053	1618.12	1.3938	1871.18	1.5902	2134.84
		46		1.0308	1383.85	1.207	1620.4	1.3954	1873.32	1.5909	2135.78
		46.0667		1.0308	1383.85	1.2042	1616.64	1.3976	1876.28	1.5904	2135.11
		46.1333		1.0328	1386.53	1.2053	1618.12	1.3964	1874.67	1.5922	2137.53
		46.2		1.0275	1379.42	1.2066	1619.86	1.3965	1874.8	1.5924	2137.8
		46.2667		1.0322	1385.73	1.2061	1619.19	1.3946	1872.25	1.5927	2138.2
		46.3333		1.032	1385.46	1.2083	1622.14	1.3961	1874.26	1.5903	2134.98
		46.4		1.0305	1383.45	1.2017	1613.28	1.3974	1876.01	1.5926	2138.07
		46.4667		1.0293	1381.84	1.2063	1619.46	1.3981	1876.95	1.5885	2132.56
		46.5333		1.0287	1381.03	1.2043	1616.77	1.397	1875.47	1.5913	2136.32
		46.6		1.0321	1385.59	1.2059	1618.92	1.3993	1878.56	1.5921	2137.39
		46.6667		1.028	1380.09	1.2029	1614.89	1.3954	1873.32	1.5929	2138.47
		46.7333		1.0292	1381.7	1.2035	1615.7	1.3986	1877.62	1.591	2135.92
		46.8		1.0331	1386.94	1.205	1617.71	1.3966	1874.94	1.5927	2138.2
		46.8667		1.03	1382.78	1.2066	1619.86	1.3984	1877.35	1.5937	2139.54
		46.9333		1.0296	1382.24	1.2061	1619.19	1.3961	1874.26	1.5911	2136.05
		47		1.0292	1381.7	1.2055	1618.38	1.3952	1873.06	1.5907	2135.51
		47.0667		1.029	1381.43	1.2044	1616.91	1.3981	1876.95	1.5883	2132.29
		47.1333		1.0281	1380.22	1.2047	1617.31	1.3961	1874.26	1.5873	2130.95
		47.2		1.0284	1380.63	1.2031	1615.16	1.396	1874.13	1.592	2137.26
		47.2667		1.034	1388.14	1.2084	1622.28	1.3986	1877.62	1.5892	2133.5
		47.3333		1.0316	1384.92	1.2075	1621.07	1.3961	1874.26	1.5933	2139.01
		47.4		1.0282	1380.36	1.2051	1617.85	1.398	1876.82	1.5895	2133.9
		47.4667		1.0311	1384.25	1.2028	1614.76	1.3963	1874.53	1.5886	2132.7
		47.5333		1.0311	1384.25	1.206	1619.06	1.3949	1872.65	1.5878	2131.62
		47.6		1.0311	1384.25	1.2056	1618.52	1.3934	1870.64	1.5928	2138.33
		47.6667		1.028	1380.09	1.2045	1617.04	1.3986	1877.62	1.5909	2135.78
		47.7333		1.032	1385.46	1.2072	1620.67	1.3946	1872.25	1.5911	2136.05
		47.8		1.0305	1383.45	1.2056	1618.52	1.3953	1873.19	1.5907	2135.51
		47.8667		1.0291	1381.57	1.2059	1618.92	1.3947	1872.38	1.5905	2135.25
		47.9333		1.0302	1383.04	1.2031	1615.16	1.3953	1873.19	1.592	2137.26
		48		1.033	1386.8	1.2038	1616.1	1.3966	1874.94	1.5895	2133.9
		48.0667		1.0284	1380.63	1.2072	1620.67	1.397	1875.47	1.5914	2136.45
		48.1333		1.0273	1379.15	1.2034	1615.56	1.3959	1874	1.5891	2133.37
		48.2		1.0297	1382.37	1.2053	1618.12	1.3961	1874.26	1.5911	2136.05
		48.2667		1.0303	1383.18	1.206	1619.06	1.3963	1874.53	1.5915	2136.59
		48.3333		1.0299	1382.64	1.2029	1614.89	1.3985	1877.49	1.5922	2137.53
		48.4		1.0321	1385.59	1.2047	1617.31	1.3953	1873.19	1.5905	2135.25
		48.4667		1.0305	1383.45	1.2044	1616.91	1.3955	1873.46	1.5892	2133.5
		48.5333		1.0298	1382.51	1.2041	1616.5	1.3944	1871.98	1.5913	2136.32
		48.6		1.0307	1383.71	1.2059	1618.92	1.3977	1876.41	1.5884	2132.43
		48.6667		1.0277	1379.69	1.205	1617.71	1.397	1875.47	1.5941	2140.08
		48.7333		1.0283	1380.49	1.2033	1615.43	1.3953	1873.19	1.5895	2133.9
		48.8		1.0304	1383.31	1.2073	1620.8	1.3983	1877.22	1.5896	2134.04
		48.8667		1.0287	1381.03	1.2058	1618.79	1.3956	1873.59	1.594	2139.95
		48.9333		1.0323	1385.86	1.2036	1615.83	1.3931	1870.24	1.5933	2139.01
		49		1.0309	1383.98	1.207	1620.4	1.3956	1873.59	1.5888	2132.96
		49.0667		1.0287	1381.03	1.202	1613.68	1.3951	1872.92	1.5909	2135.78
		49.1333		1.0297	1382.37	1.205	1617.71	1.3993	1878.56	1.5891	2133.37
		49.2		1.0278	1379.82	1.2066	1619.86	1.3988	1877.89	1.5875	2131.22
		49.2667		1.0302	1383.04	1.2043	1616.77	1.3938	1871.18	1.5898	2134.31
		49.3333		1.0331	1386.94	1.2056	1618.52	1.398	1876.82	1.5898	2134.31
		49.4		1.0309	1383.98	1.2036	1615.83	1.3964	1874.67	1.5915	2136.59
		49.4667		1.03	1382.78	1.2061	1619.19	1.3944	1871.98	1.5915	2136.59
		49.5333		1.0279	1379.96	1.2043	1616.77	1.394	1871.44	1.5923	2137.66
		49.6		1.0309	1383.98	1.2052	1617.98	1.3979	1876.68	1.5929	2138.47
		49.6667		1.0307	1383.71	1.206	1619.06	1.3992	1878.43	1.5924	2137.8
		49.7333		1.0319	1385.33	1.2024	1614.22	1.3974	1876.01	1.5884	2132.43
		49.8		1.0318	1385.19	1.2044	1616.91	1.3953	1873.19	1.5877	2131.49
		49.8667		1.0293	1381.84	1.2068	1620.13	1.3958	1873.86	1.5877	2131.49
		49.9333		1.0309	1383.98	1.2017	1613.28	1.3958	1873.86	1.5903	2134.98
		50		1.0288	1381.16	1.2035	1615.7	1.3942	1871.71	1.5888	2132.96
		50.0667		1.0299	1382.64	1.2053	1618.12	1.3953	1873.19	1.5885	2132.56
		50.1333		1.0317	1385.06	1.2063	1619.46	1.3957	1873.73	1.5894	2133.77
		50.2		1.0286	1380.9	1.2044	1616.91	1.3972	1875.74	1.5882	2132.16
		50.2667		1.0277	1379.69	1.2085	1622.41	1.3958	1873.86	1.591	2135.92
		50.3333		1.0308	1383.85	1.2043	1616.77	1.3957	1873.73	1.5872	2130.82
		50.4		1.0306	1383.58	1.1999	1610.87	1.3985	1877.49	1.5895	2133.9
		50.4667		1.0291	1381.57	1.2043	1616.77	1.3966	1874.94	1.5894	2133.77
		50.5333		1.0284	1380.63	1.2001	1611.13	1.3972	1875.74	1.5916	2136.72
		50.6		1.0296	1382.24	1.2048	1617.44	1.3981	1876.95	1.5891	2133.37
		50.6667		1.0285	1380.76	1.2034	1615.56	1.3939	1871.31	1.5902	2134.84
		50.7333		1.0286	1380.9	1.2065	1619.73	1.3972	1875.74	1.5917	2136.86
		50.8		1.0288	1381.16	1.2047	1617.31	1.3935	1870.77	1.5881	2132.02
		50.8667		1.0302	1383.04	1.2035	1615.7	1.3982	1877.08	1.5871	2130.68
		50.9333		1.0301	1382.91	1.2057	1618.65	1.3943	1871.85	1.5857	2128.8
		51		1.0279	1379.96	1.2051	1617.85	1.3964	1874.67	1.5873	2130.95
		51.0667		1.0285	1380.76	1.2024	1614.22	1.3979	1876.68	1.5861	2129.34
		51.1333		1.0279	1379.96	1.2053	1618.12	1.396	1874.13	1.587	2130.55
		51.2		1.03	1382.78	1.2043	1616.77	1.3949	1872.65	1.5879	2131.76
		51.2667		1.0287	1381.03	1.2043	1616.77	1.3939	1871.31	1.5918	2136.99
		51.3333		1.0306	1383.58	1.207	1620.4	1.3969	1875.34	1.591	2135.92
		51.4		1.0289	1381.3	1.2046	1617.18	1.3973	1875.88	1.5873	2130.95
		51.4667		1.0311	1384.25	1.2043	1616.77	1.3988	1877.89	1.5892	2133.5
		51.5333		1.0283	1380.49	1.2037	1615.97	1.3967	1875.07	1.5867	2130.14
		51.6		1.0295	1382.1	1.2017	1613.28	1.3966	1874.94	1.5882	2132.16
		51.6667		1.0285	1380.76	1.2023	1614.09	1.3941	1871.58	1.5892	2133.5
		51.7333		1.0282	1380.36	1.204	1616.37	1.3946	1872.25	1.5852	2128.13
		51.8		1.0314	1384.65	1.2044	1616.91	1.3924	1869.3	1.5877	2131.49
		51.8667		1.03	1382.78	1.2044	1616.91	1.3943	1871.85	1.588	2131.89
		51.9333		1.0287	1381.03	1.2069	1620.26	1.3975	1876.14	1.5887	2132.83
		52		1.0304	1383.31	1.2045	1617.04	1.4028	1883.26	1.5887	2132.83
		52.0667		1.0291	1381.57	1.2024	1614.22	1.3951	1872.92	1.5864	2129.74
		52.1333		1.0265	1378.08	1.2043	1616.77	1.3956	1873.59	1.5876	2131.35
		52.2		1.0303	1383.18	1.2075	1621.07	1.3928	1869.83	1.5906	2135.38
		52.2667		1.0292	1381.7	1.2031	1615.16	1.3951	1872.92	1.5861	2129.34
		52.3333		1.0288	1381.16	1.2025	1614.36	1.3951	1872.92	1.5868	2130.28
		52.4		1.032	1385.46	1.2034	1615.56	1.3924	1869.3	1.5895	2133.9
		52.4667		1.0323	1385.86	1.2048	1617.44	1.3932	1870.37	1.5885	2132.56
		52.5333		1.0314	1384.65	1.2041	1616.5	1.3955	1873.46	1.5914	2136.45
		52.6		1.0294	1381.97	1.2028	1614.76	1.394	1871.44	1.5902	2134.84
		52.6667		1.0305	1383.45	1.2013	1612.75	1.3948	1872.52	1.586	2129.2
		52.7333		1.0286	1380.9	1.2059	1618.92	1.3961	1874.26	1.5872	2130.82
		52.8		1.0266	1378.21	1.2046	1617.18	1.3948	1872.52	1.5886	2132.7
		52.8667		1.0291	1381.57	1.2024	1614.22	1.3951	1872.92	1.5879	2131.76
		52.9333		1.0292	1381.7	1.207	1620.4	1.3931	1870.24	1.5866	2130.01
		53		1.0299	1382.64	1.201	1612.34	1.3963	1874.53	1.5903	2134.98
		53.0667		1.0283	1380.49	1.2024	1614.22	1.3957	1873.73	1.5866	2130.01
		53.1333		1.0302	1383.04	1.2047	1617.31	1.3947	1872.38	1.5898	2134.31
		53.2		1.0318	1385.19	1.2029	1614.89	1.3959	1874	1.5873	2130.95
		53.2667		1.0311	1384.25	1.2046	1617.18	1.3944	1871.98	1.5928	2138.33
		53.3333		1.0292	1381.7	1.2023	1614.09	1.394	1871.44	1.591	2135.92
		53.4		1.0291	1381.57	1.2023	1614.09	1.3946	1872.25	1.5882	2132.16
		53.4667		1.0289	1381.3	1.2023	1614.09	1.3915	1868.09	1.5903	2134.98
		53.5333		1.0319	1385.33	1.204	1616.37	1.3947	1872.38	1.5859	2129.07
		53.6		1.0278	1379.82	1.202	1613.68	1.3921	1868.89	1.5877	2131.49
		53.6667		1.0269	1378.61	1.2029	1614.89	1.3955	1873.46	1.5872	2130.82
		53.7333		1.0277	1379.69	1.2031	1615.16	1.3951	1872.92	1.5883	2132.29
		53.8		1.0295	1382.1	1.2017	1613.28	1.3943	1871.85	1.5856	2128.67
		53.8667		1.0316	1384.92	1.2041	1616.5	1.3951	1872.92	1.5858	2128.94
		53.9333		1.0292	1381.7	1.2039	1616.24	1.3942	1871.71	1.5863	2129.61
		54		1.0296	1382.24	1.2018	1613.42	1.3962	1874.4	1.5886	2132.7
		54.0667		1.0267	1378.34	1.1999	1610.87	1.3944	1871.98	1.5905	2135.25
		54.1333		1.03	1382.78	1.2033	1615.43	1.3927	1869.7	1.586	2129.2
		54.2		1.0274	1379.28	1.2027	1614.62	1.3927	1869.7	1.5861	2129.34
		54.2667		1.0302	1383.04	1.203	1615.03	1.3935	1870.77	1.5884	2132.43
		54.3333		1.0307	1383.71	1.2035	1615.7	1.3962	1874.4	1.588	2131.89
		54.4		1.0294	1381.97	1.2043	1616.77	1.3953	1873.19	1.5853	2128.27
		54.4667		1.0281	1380.22	1.2037	1615.97	1.3944	1871.98	1.5843	2126.92
		54.5333		1.0321	1385.59	1.2051	1617.85	1.3954	1873.32	1.5865	2129.88
		54.6		1.0275	1379.42	1.2014	1612.88	1.3951	1872.92	1.5865	2129.88
		54.6667		1.0308	1383.85	1.2027	1614.62	1.3979	1876.68	1.5882	2132.16
		54.7333		1.0298	1382.51	1.2045	1617.04	1.3935	1870.77	1.584	2126.52
		54.8		1.0277	1379.69	1.2035	1615.7	1.3906	1866.88	1.587	2130.55
		54.8667		1.0334	1387.34	1.2011	1612.48	1.3961	1874.26	1.59	2134.57
		54.9333		1.0284	1380.63	1.2032	1615.3	1.3943	1871.85	1.5879	2131.76
		55		1.0277	1379.69	1.2062	1619.32	1.3958	1873.86	1.5869	2130.41
		55.0667		1.0303	1383.18	1.2012	1612.61	1.395	1872.79	1.5821	2123.97
		55.1333		1.0261	1377.54	1.2058	1618.79	1.3926	1869.57	1.5864	2129.74
		55.2		1.0267	1378.34	1.2032	1615.3	1.3919	1868.63	1.5877	2131.49
		55.2667		1.0264	1377.94	1.2056	1618.52	1.3922	1869.03	1.5854	2128.4
		55.3333		1.0304	1383.31	1.2023	1614.09	1.3939	1871.31	1.5873	2130.95
		55.4		1.03	1382.78	1.2073	1620.8	1.3949	1872.65	1.5879	2131.76
		55.4667		1.0305	1383.45	1.2027	1614.62	1.3939	1871.31	1.5828	2124.91
		55.5333		1.0331	1386.94	1.2016	1613.15	1.3944	1871.98	1.5869	2130.41
		55.6		1.0292	1381.7	1.2033	1615.43	1.3938	1871.18	1.589	2133.23
		55.6667		1.029	1381.43	1.2017	1613.28	1.3935	1870.77	1.5867	2130.14
		55.7333		1.0286	1380.9	1.2036	1615.83	1.3934	1870.64	1.5849	2127.73
		55.8		1.0294	1381.97	1.201	1612.34	1.3938	1871.18	1.5887	2132.83
		55.8667		1.0316	1384.92	1.2029	1614.89	1.3936	1870.91	1.5841	2126.65
		55.9333		1.0276	1379.55	1.2033	1615.43	1.3923	1869.16	1.5918	2136.99
		56		1.0283	1380.49	1.2037	1615.97	1.3971	1875.61	1.5871	2130.68
		56.0667		1.0277	1379.69	1.2023	1614.09	1.3951	1872.92	1.5887	2132.83
		56.1333		1.0284	1380.63	1.202	1613.68	1.3925	1869.43	1.5843	2126.92
		56.2		1.0312	1384.39	1.2036	1615.83	1.3921	1868.89	1.5874	2131.08
		56.2667		1.0282	1380.36	1.2012	1612.61	1.3969	1875.34	1.5872	2130.82
		56.3333		1.0291	1381.57	1.2031	1615.16	1.3949	1872.65	1.584	2126.52
		56.4		1.0287	1381.03	1.2007	1611.94	1.3953	1873.19	1.5869	2130.41
		56.4667		1.0296	1382.24	1.2021	1613.82	1.3931	1870.24	1.5846	2127.33
		56.5333		1.0277	1379.69	1.2007	1611.94	1.3923	1869.16	1.5892	2133.5
		56.6		1.0307	1383.71	1.2038	1616.1	1.3931	1870.24	1.5863	2129.61
		56.6667		1.0283	1380.49	1.2062	1619.32	1.3962	1874.4	1.5854	2128.4
		56.7333		1.0288	1381.16	1.2065	1619.73	1.3937	1871.04	1.5858	2128.94
		56.8		1.0316	1384.92	1.2001	1611.13	1.3936	1870.91	1.5849	2127.73
		56.8667		1.0278	1379.82	1.2041	1616.5	1.3925	1869.43	1.587	2130.55
		56.9333		1.0284	1380.63	1.2044	1616.91	1.3905	1866.75	1.5861	2129.34
		57		1.0278	1379.82	1.1993	1610.06	1.3908	1867.15	1.5879	2131.76
		57.0667		1.0306	1383.58	1.2027	1614.62	1.396	1874.13	1.5839	2126.39
		57.1333		1.03	1382.78	1.204	1616.37	1.3935	1870.77	1.5867	2130.14
		57.2		1.03	1382.78	1.2021	1613.82	1.3927	1869.7	1.5855	2128.53
		57.2667		1.0291	1381.57	1.2024	1614.22	1.3956	1873.59	1.5864	2129.74
		57.3333		1.0288	1381.16	1.2052	1617.98	1.3907	1867.01	1.582	2123.84
		57.4		1.0275	1379.42	1.2023	1614.09	1.3918	1868.49	1.5844	2127.06
		57.4667		1.0306	1383.58	1.202	1613.68	1.3924	1869.3	1.5839	2126.39
		57.5333		1.0276	1379.55	1.2039	1616.24	1.3908	1867.15	1.5878	2131.62
		57.6		1.0273	1379.15	1.2038	1616.1	1.3929	1869.97	1.5844	2127.06
		57.6667		1.0291	1381.57	1.2059	1618.92	1.3943	1871.85	1.5831	2125.31
		57.7333		1.0285	1380.76	1.2024	1614.22	1.3923	1869.16	1.5862	2129.47
		57.8		1.0279	1379.96	1.2016	1613.15	1.3926	1869.57	1.5839	2126.39
		57.8667		1.0299	1382.64	1.2046	1617.18	1.3926	1869.57	1.5868	2130.28
		57.9333		1.0271	1378.88	1.2029	1614.89	1.391	1867.42	1.5871	2130.68
		58		1.0302	1383.04	1.2025	1614.36	1.3943	1871.85	1.5842	2126.79
		58.0667		1.027	1378.75	1.2024	1614.22	1.3931	1870.24	1.588	2131.89
		58.1333		1.0275	1379.42	1.2025	1614.36	1.3933	1870.51	1.5859	2129.07
		58.2		1.0288	1381.16	1.201	1612.34	1.3944	1871.98	1.5832	2125.45
		58.2667		1.0296	1382.24	1.2056	1618.52	1.392	1868.76	1.5867	2130.14
		58.3333		1.0282	1380.36	1.2022	1613.95	1.3952	1873.06	1.5839	2126.39
		58.4		1.0297	1382.37	1.2048	1617.44	1.3958	1873.86	1.5824	2124.37
		58.4667		1.0263	1377.81	1.2022	1613.95	1.393	1870.1	1.5836	2125.98
		58.5333		1.0249	1375.93	1.2069	1620.26	1.3969	1875.34	1.5851	2128
		58.6		1.0326	1386.27	1.2016	1613.15	1.3901	1866.21	1.5854	2128.4
		58.6667		1.0291	1381.57	1.2007	1611.94	1.3951	1872.92	1.5842	2126.79
		58.7333		1.0271	1378.88	1.2007	1611.94	1.3942	1871.71	1.5843	2126.92
		58.8		1.0291	1381.57	1.2006	1611.81	1.3911	1867.55	1.5844	2127.06
		58.8667		1.0293	1381.84	1.2027	1614.62	1.3938	1871.18	1.5874	2131.08
		58.9333		1.0276	1379.55	1.2039	1616.24	1.3917	1868.36	1.5887	2132.83
		59		1.0276	1379.55	1.2011	1612.48	1.3944	1871.98	1.5897	2134.17
		59.0667		1.0303	1383.18	1.1994	1610.19	1.3914	1867.95	1.5849	2127.73
		59.1333		1.0274	1379.28	1.2025	1614.36	1.3923	1869.16	1.5864	2129.74
		59.2		1.0286	1380.9	1.2013	1612.75	1.3908	1867.15	1.5835	2125.85
		59.2667		1.0296	1382.24	1.2028	1614.76	1.3931	1870.24	1.5848	2127.59
		59.3333		1.0315	1384.79	1.2006	1611.81	1.3945	1872.12	1.5836	2125.98
		59.4		1.03	1382.78	1.2033	1615.43	1.3923	1869.16	1.5831	2125.31
		59.4667		1.0276	1379.55	1.2026	1614.49	1.3919	1868.63	1.5856	2128.67
		59.5333		1.027	1378.75	1.2049	1617.58	1.3929	1869.97	1.5817	2123.43
		59.6		1.0293	1381.84	1.2057	1618.65	1.3922	1869.03	1.5853	2128.27
		59.6667		1.0298	1382.51	1.2038	1616.1	1.3945	1872.12	1.582	2123.84
		59.7333		1.0283	1380.49	1.2015	1613.01	1.3917	1868.36	1.5832	2125.45
		59.8		1.029	1381.43	1.2011	1612.48	1.3916	1868.22	1.5857	2128.8
		59.8667		1.0267	1378.34	1.2024	1614.22	1.3912	1867.69	1.587	2130.55
		59.9333		1.0259	1377.27	1.2015	1613.01	1.3905	1866.75	1.5834	2125.71
		60		1.0287	1381.03	1.2015	1613.01	1.3927	1869.7	1.5832	2125.45
		60.0667		1.029	1381.43	1.2033	1615.43	1.3908	1867.15	1.5819	2123.7
		60.1333		1.0293	1381.84	1.2012	1612.61	1.3911	1867.55	1.5837	2126.12
		60.2		1.0296	1382.24	1.2006	1611.81	1.3949	1872.65	1.5839	2126.39
		60.2667		1.0274	1379.28	1.2007	1611.94	1.3911	1867.55	1.5841	2126.65
		60.3333		1.0275	1379.42	1.2003	1611.4	1.3932	1870.37	1.587	2130.55
		60.4		1.0284	1380.63	1.2019	1613.55	1.3963	1874.53	1.5864	2129.74
		60.4667		1.0308	1383.85	1.2009	1612.21	1.3932	1870.37	1.5823	2124.24
		60.5333		1.0277	1379.69	1.1993	1610.06	1.3917	1868.36	1.586	2129.2
		60.6		1.0292	1381.7	1.1988	1609.39	1.3916	1868.22	1.5846	2127.33
		60.6667		1.0275	1379.42	1.2013	1612.75	1.3912	1867.69	1.5821	2123.97
		60.7333		1.0277	1379.69	1.201	1612.34	1.3905	1866.75	1.5849	2127.73
		60.8		1.0255	1376.73	1.2038	1616.1	1.3911	1867.55	1.5821	2123.97
		60.8667		1.0288	1381.16	1.1999	1610.87	1.3915	1868.09	1.5813	2122.9
		60.9333		1.0272	1379.02	1.2006	1611.81	1.3947	1872.38	1.5837	2126.12
		61		1.0277	1379.69	1.2029	1614.89	1.3916	1868.22	1.5814	2123.03
		61.0667		1.0274	1379.28	1.2003	1611.4	1.394	1871.44	1.5838	2126.25
		61.1333		1.0298	1382.51	1.199	1609.66	1.3934	1870.64	1.5831	2125.31
		61.2		1.029	1381.43	1.2002	1611.27	1.3909	1867.28	1.5823	2124.24
		61.2667		1.0292	1381.7	1.2012	1612.61	1.3906	1866.88	1.5801	2121.28
		61.3333		1.0296	1382.24	1.2027	1614.62	1.3914	1867.95	1.5845	2127.19
		61.4		1.0289	1381.3	1.2006	1611.81	1.3893	1865.14	1.5817	2123.43
		61.4667		1.0292	1381.7	1.2034	1615.56	1.3901	1866.21	1.5834	2125.71
		61.5333		1.028	1380.09	1.2025	1614.36	1.3897	1865.67	1.5837	2126.12
		61.6		1.0289	1381.3	1.2004	1611.54	1.3917	1868.36	1.5832	2125.45
		61.6667		1.0285	1380.76	1.2048	1617.44	1.3922	1869.03	1.5849	2127.73
		61.7333		1.0293	1381.84	1.2046	1617.18	1.3903	1866.48	1.5845	2127.19
		61.8		1.0275	1379.42	1.2015	1613.01	1.3908	1867.15	1.5855	2128.53
		61.8667		1.0267	1378.34	1.1993	1610.06	1.3923	1869.16	1.5819	2123.7
		61.9333		1.0297	1382.37	1.2001	1611.13	1.394	1871.44	1.5838	2126.25
		62		1.0313	1384.52	1.2012	1612.61	1.387	1862.05	1.5847	2127.46
		62.0667		1.0302	1383.04	1.2032	1615.3	1.3923	1869.16	1.5829	2125.04
		62.1333		1.0284	1380.63	1.199	1609.66	1.3924	1869.3	1.5802	2121.42
		62.2		1.0284	1380.63	1.2003	1611.4	1.389	1864.73	1.5821	2123.97
		62.2667		1.0321	1385.59	1.1983	1608.72	1.3901	1866.21	1.5844	2127.06
		62.3333		1.0263	1377.81	1.2005	1611.67	1.3887	1864.33	1.5835	2125.85
		62.4		1.0254	1376.6	1.2038	1616.1	1.3905	1866.75	1.5829	2125.04
		62.4667		1.0284	1380.63	1.2044	1616.91	1.3907	1867.01	1.582	2123.84
		62.5333		1.0265	1378.08	1.1999	1610.87	1.3905	1866.75	1.584	2126.52
		62.6		1.0296	1382.24	1.2006	1611.81	1.3896	1865.54	1.5824	2124.37
		62.6667		1.0268	1378.48	1.2009	1612.21	1.3898	1865.81	1.5845	2127.19
		62.7333		1.0276	1379.55	1.202	1613.68	1.3874	1862.58	1.5863	2129.61
		62.8		1.0266	1378.21	1.2001	1611.13	1.3899	1865.94	1.5782	2118.73
		62.8667		1.0276	1379.55	1.2049	1617.58	1.3893	1865.14	1.5815	2123.16
		62.9333		1.0295	1382.1	1.1986	1609.12	1.3905	1866.75	1.5817	2123.43
		63		1.0289	1381.3	1.2007	1611.94	1.3918	1868.49	1.5832	2125.45
		63.0667		1.027	1378.75	1.2006	1611.81	1.3902	1866.34	1.5826	2124.64
		63.1333		1.0265	1378.08	1.2001	1611.13	1.3889	1864.6	1.5842	2126.79
		63.2		1.0285	1380.76	1.2017	1613.28	1.3906	1866.88	1.5814	2123.03
		63.2667		1.0282	1380.36	1.1978	1608.05	1.3902	1866.34	1.5803	2121.55
		63.3333		1.0298	1382.51	1.2017	1613.28	1.3896	1865.54	1.5832	2125.45
		63.4		1.0266	1378.21	1.2001	1611.13	1.389	1864.73	1.5858	2128.94
		63.4667		1.0265	1378.08	1.1995	1610.33	1.3913	1867.82	1.5834	2125.71
		63.5333		1.0298	1382.51	1.2008	1612.07	1.3925	1869.43	1.5847	2127.46
		63.6		1.0298	1382.51	1.2004	1611.54	1.3916	1868.22	1.5802	2121.42
		63.6667		1.0267	1378.34	1.2011	1612.48	1.3888	1864.46	1.5823	2124.24
		63.7333		1.0285	1380.76	1.2	1611	1.3884	1863.93	1.581	2122.49
		63.8		1.0283	1380.49	1.2015	1613.01	1.3887	1864.33	1.5828	2124.91
		63.8667		1.0301	1382.91	1.1989	1609.52	1.3955	1873.46	1.5834	2125.71
		63.9333		1.0288	1381.16	1.2018	1613.42	1.392	1868.76	1.5817	2123.43
		64		1.0282	1380.36	1.2	1611	1.3885	1864.06	1.5824	2124.37
		64.0667		1.0276	1379.55	1.2046	1617.18	1.3903	1866.48	1.5807	2122.09
		64.1333		1.029	1381.43	1.2006	1611.81	1.3906	1866.88	1.5817	2123.43
		64.2		1.0272	1379.02	1.2003	1611.4	1.3882	1863.66	1.5842	2126.79
		64.2667		1.0283	1380.49	1.1996	1610.46	1.3911	1867.55	1.5862	2129.47
		64.3333		1.0293	1381.84	1.201	1612.34	1.3954	1873.32	1.5832	2125.45
		64.4		1.0265	1378.08	1.1993	1610.06	1.3896	1865.54	1.5811	2122.63
		64.4667		1.0264	1377.94	1.1979	1608.18	1.3904	1866.61	1.5823	2124.24
		64.5333		1.0268	1378.48	1.2007	1611.94	1.3896	1865.54	1.5803	2121.55
		64.6		1.0276	1379.55	1.1991	1609.79	1.3911	1867.55	1.5806	2121.96
		64.6667		1.0286	1380.9	1.1988	1609.39	1.3881	1863.52	1.5798	2120.88
		64.7333		1.027	1378.75	1.2062	1619.32	1.3893	1865.14	1.5839	2126.39
		64.8		1.0271	1378.88	1.1999	1610.87	1.3896	1865.54	1.5825	2124.51
		64.8667		1.0271	1378.88	1.2002	1611.27	1.3902	1866.34	1.5786	2119.27
		64.9333		1.0264	1377.94	1.2021	1613.82	1.3926	1869.57	1.5825	2124.51
		65		1.0281	1380.22	1.2014	1612.88	1.3919	1868.63	1.58	2121.15
		65.0667		1.0274	1379.28	1.203	1615.03	1.3902	1866.34	1.5804	2121.69
		65.1333		1.0281	1380.22	1.1995	1610.33	1.3891	1864.87	1.58	2121.15
		65.2		1.0298	1382.51	1.2031	1615.16	1.3879	1863.26	1.5798	2120.88
		65.2667		1.0279	1379.96	1.1973	1607.38	1.3875	1862.72	1.5824	2124.37
		65.3333		1.0292	1381.7	1.2004	1611.54	1.3887	1864.33	1.5828	2124.91
		65.4		1.0283	1380.49	1.2046	1617.18	1.3875	1862.72	1.5814	2123.03
		65.4667		1.0265	1378.08	1.1995	1610.33	1.3877	1862.99	1.5826	2124.64
		65.5333		1.0295	1382.1	1.2016	1613.15	1.39	1866.08	1.5785	2119.14
		65.6		1.0278	1379.82	1.1984	1608.85	1.3896	1865.54	1.5804	2121.69
		65.6667		1.0271	1378.88	1.2042	1616.64	1.3908	1867.15	1.5787	2119.4
		65.7333		1.028	1380.09	1.2029	1614.89	1.3883	1863.79	1.581	2122.49
		65.8		1.0257	1377	1.2016	1613.15	1.3886	1864.2	1.5836	2125.98
		65.8667		1.0277	1379.69	1.2006	1611.81	1.3906	1866.88	1.5807	2122.09
		65.9333		1.0259	1377.27	1.199	1609.66	1.3891	1864.87	1.581	2122.49
		66		1.0264	1377.94	1.2002	1611.27	1.3902	1866.34	1.5804	2121.69
		66.0667		1.0279	1379.96	1.2022	1613.95	1.3877	1862.99	1.5778	2118.2
		66.1333		1.0288	1381.16	1.201	1612.34	1.3872	1862.32	1.582	2123.84
		66.2		1.0271	1378.88	1.1989	1609.52	1.3924	1869.3	1.5817	2123.43
		66.2667		1.026	1377.4	1.199	1609.66	1.3913	1867.82	1.5817	2123.43
		66.3333		1.0278	1379.82	1.2013	1612.75	1.3901	1866.21	1.581	2122.49
		66.4		1.0271	1378.88	1.2019	1613.55	1.3875	1862.72	1.5823	2124.24
		66.4667		1.028	1380.09	1.198	1608.32	1.3895	1865.4	1.581	2122.49
		66.5333		1.0275	1379.42	1.1977	1607.91	1.3886	1864.2	1.581	2122.49
		66.6		1.0267	1378.34	1.2011	1612.48	1.389	1864.73	1.5836	2125.98
		66.6667		1.0266	1378.21	1.2003	1611.4	1.3878	1863.12	1.5817	2123.43
		66.7333		1.0287	1381.03	1.1998	1610.73	1.3877	1862.99	1.5784	2119
		66.8		1.0297	1382.37	1.1993	1610.06	1.3882	1863.66	1.5792	2120.08
		66.8667		1.0281	1380.22	1.1975	1607.64	1.3865	1861.38	1.5804	2121.69
		66.9333		1.0256	1376.87	1.2001	1611.13	1.3883	1863.79	1.5794	2120.34
		67		1.0265	1378.08	1.1973	1607.38	1.3882	1863.66	1.58	2121.15
		67.0667		1.0287	1381.03	1.1998	1610.73	1.3887	1864.33	1.5824	2124.37
		67.1333		1.0272	1379.02	1.2022	1613.95	1.3912	1867.69	1.5803	2121.55
		67.2		1.0307	1383.71	1.1994	1610.19	1.3883	1863.79	1.5799	2121.02
		67.2667		1.0269	1378.61	1.1996	1610.46	1.3874	1862.58	1.58	2121.15
		67.3333		1.0276	1379.55	1.1977	1607.91	1.3887	1864.33	1.5817	2123.43
		67.4		1.0281	1380.22	1.1956	1605.09	1.3879	1863.26	1.5842	2126.79
		67.4667		1.0312	1384.39	1.2001	1611.13	1.3872	1862.32	1.5804	2121.69
		67.5333		1.0271	1378.88	1.1995	1610.33	1.389	1864.73	1.5805	2121.82
		67.6		1.0285	1380.76	1.1995	1610.33	1.3912	1867.69	1.5844	2127.06
		67.6667		1.0258	1377.14	1.2014	1612.88	1.3914	1867.95	1.5789	2119.67
		67.7333		1.0261	1377.54	1.2002	1611.27	1.3895	1865.4	1.5804	2121.69
		67.8		1.0292	1381.7	1.1991	1609.79	1.3878	1863.12	1.5815	2123.16
		67.8667		1.027	1378.75	1.2001	1611.13	1.3891	1864.87	1.5796	2120.61
		67.9333		1.0265	1378.08	1.2012	1612.61	1.3903	1866.48	1.5804	2121.69
		68		1.0272	1379.02	1.2	1611	1.3894	1865.27	1.5785	2119.14
		68.0667		1.0264	1377.94	1.2003	1611.4	1.3864	1861.24	1.5785	2119.14
		68.1333		1.0309	1383.98	1.1977	1607.91	1.3898	1865.81	1.58	2121.15
		68.2		1.0278	1379.82	1.1991	1609.79	1.3902	1866.34	1.5791	2119.94
		68.2667		1.0267	1378.34	1.2003	1611.4	1.3889	1864.6	1.5791	2119.94
		68.3333		1.0288	1381.16	1.1993	1610.06	1.3895	1865.4	1.5784	2119
		68.4		1.0311	1384.25	1.2008	1612.07	1.3875	1862.72	1.5842	2126.79
		68.4667		1.0259	1377.27	1.2017	1613.28	1.3899	1865.94	1.5787	2119.4
		68.5333		1.0271	1378.88	1.1997	1610.6	1.3872	1862.32	1.5804	2121.69
		68.6		1.0273	1379.15	1.1984	1608.85	1.3896	1865.54	1.5817	2123.43
		68.6667		1.0258	1377.14	1.201	1612.34	1.3873	1862.45	1.5802	2121.42
		68.7333		1.0292	1381.7	1.2001	1611.13	1.3863	1861.11	1.5783	2118.87
		68.8		1.0272	1379.02	1.2021	1613.82	1.3859	1860.57	1.5812	2122.76
		68.8667		1.0254	1376.6	1.2002	1611.27	1.3867	1861.64	1.5811	2122.63
		68.9333		1.0267	1378.34	1.1988	1609.39	1.39	1866.08	1.5758	2115.51
		69		1.0274	1379.28	1.2007	1611.94	1.3861	1860.84	1.581	2122.49
		69.0667		1.0271	1378.88	1.1991	1609.79	1.3916	1868.22	1.5817	2123.43
		69.1333		1.0261	1377.54	1.2014	1612.88	1.387	1862.05	1.579	2119.81
		69.2		1.0272	1379.02	1.1971	1607.11	1.3888	1864.46	1.5829	2125.04
		69.2667		1.0273	1379.15	1.201	1612.34	1.3903	1866.48	1.5791	2119.94
		69.3333		1.0271	1378.88	1.197	1606.97	1.3884	1863.93	1.5798	2120.88
		69.4		1.0257	1377	1.2008	1612.07	1.3904	1866.61	1.578	2118.47
		69.4667		1.0258	1377.14	1.2009	1612.21	1.3869	1861.91	1.5812	2122.76
		69.5333		1.0285	1380.76	1.1992	1609.93	1.3888	1864.46	1.5772	2117.39
		69.6		1.029	1381.43	1.1981	1608.45	1.3872	1862.32	1.5781	2118.6
		69.6667		1.0271	1378.88	1.2	1611	1.3888	1864.46	1.5791	2119.94
		69.7333		1.0293	1381.84	1.201	1612.34	1.3878	1863.12	1.5802	2121.42
		69.8		1.0294	1381.97	1.1984	1608.85	1.3858	1860.44	1.5802	2121.42
		69.8667		1.0288	1381.16	1.2012	1612.61	1.3895	1865.4	1.5825	2124.51
		69.9333		1.0281	1380.22	1.1972	1607.24	1.3862	1860.97	1.581	2122.49
		70		1.0276	1379.55	1.202	1613.68	1.3877	1862.99	1.5792	2120.08
		70.0667		1.0287	1381.03	1.1977	1607.91	1.3847	1858.96	1.5769	2116.99
		70.1333		1.028	1380.09	1.1974	1607.51	1.3871	1862.18	1.5786	2119.27
		70.2		1.0258	1377.14	1.1998	1610.73	1.3883	1863.79	1.5783	2118.87
		70.2667		1.0267	1378.34	1.1979	1608.18	1.3875	1862.72	1.5796	2120.61
		70.3333		1.0276	1379.55	1.1978	1608.05	1.3871	1862.18	1.5808	2122.22
		70.4		1.0266	1378.21	1.2007	1611.94	1.3849	1859.23	1.5811	2122.63
		70.4667		1.0289	1381.3	1.1974	1607.51	1.3893	1865.14	1.583	2125.18
		70.5333		1.0314	1384.65	1.1995	1610.33	1.3887	1864.33	1.5803	2121.55
		70.6		1.0245	1375.39	1.2	1611	1.3887	1864.33	1.5793	2120.21
		70.6667		1.0282	1380.36	1.198	1608.32	1.3908	1867.15	1.5795	2120.48
		70.7333		1.0294	1381.97	1.1973	1607.38	1.3874	1862.58	1.5786	2119.27
		70.8		1.028	1380.09	1.1993	1610.06	1.3878	1863.12	1.578	2118.47
		70.8667		1.0253	1376.47	1.199	1609.66	1.3868	1861.78	1.5786	2119.27
		70.9333		1.0277	1379.69	1.2008	1612.07	1.3886	1864.2	1.5785	2119.14
		71		1.024	1374.72	1.1992	1609.93	1.3886	1864.2	1.5836	2125.98
		71.0667		1.0256	1376.87	1.1974	1607.51	1.3883	1863.79	1.5799	2121.02
		71.1333		1.0289	1381.3	1.2001	1611.13	1.3883	1863.79	1.5819	2123.7
		71.2		1.0282	1380.36	1.1981	1608.45	1.3848	1859.09	1.5783	2118.87
		71.2667		1.0253	1376.47	1.2001	1611.13	1.3878	1863.12	1.579	2119.81
		71.3333		1.0265	1378.08	1.1977	1607.91	1.3867	1861.64	1.5753	2114.84
		71.4		1.0255	1376.73	1.1998	1610.73	1.389	1864.73	1.576	2115.78
		71.4667		1.028	1380.09	1.198	1608.32	1.389	1864.73	1.5788	2119.54
		71.5333		1.0281	1380.22	1.196	1605.63	1.3862	1860.97	1.5822	2124.1
		71.6		1.0268	1378.48	1.1979	1608.18	1.3893	1865.14	1.5807	2122.09
		71.6667		1.0262	1377.67	1.1975	1607.64	1.389	1864.73	1.577	2117.12
		71.7333		1.0266	1378.21	1.198	1608.32	1.3885	1864.06	1.5822	2124.1
		71.8		1.0281	1380.22	1.1989	1609.52	1.3884	1863.93	1.5763	2116.18
		71.8667		1.0278	1379.82	1.1987	1609.25	1.3864	1861.24	1.5759	2115.65
		71.9333		1.0238	1374.45	1.2005	1611.67	1.3913	1867.82	1.5763	2116.18
		72		1.0264	1377.94	1.1994	1610.19	1.3866	1861.51	1.5786	2119.27
		72.0667		1.0269	1378.61	1.2017	1613.28	1.3866	1861.51	1.5798	2120.88
		72.1333		1.0262	1377.67	1.198	1608.32	1.3862	1860.97	1.5823	2124.24
		72.2		1.0271	1378.88	1.1995	1610.33	1.3876	1862.85	1.5797	2120.75
		72.2667		1.0255	1376.73	1.1997	1610.6	1.3878	1863.12	1.5783	2118.87
		72.3333		1.0263	1377.81	1.1971	1607.11	1.3852	1859.63	1.5784	2119
		72.4		1.0275	1379.42	1.1987	1609.25	1.3893	1865.14	1.5755	2115.11
		72.4667		1.029	1381.43	1.2	1611	1.3868	1861.78	1.5788	2119.54
		72.5333		1.0298	1382.51	1.2001	1611.13	1.3881	1863.52	1.5781	2118.6
		72.6		1.0279	1379.96	1.1969	1606.84	1.3899	1865.94	1.5768	2116.85
		72.6667		1.0248	1375.79	1.2028	1614.76	1.3873	1862.45	1.5792	2120.08
		72.7333		1.0269	1378.61	1.1991	1609.79	1.3871	1862.18	1.5785	2119.14
		72.8		1.0272	1379.02	1.1988	1609.39	1.3853	1859.77	1.5797	2120.75
		72.8667		1.0289	1381.3	1.1985	1608.99	1.3865	1861.38	1.5784	2119
		72.9333		1.028	1380.09	1.1995	1610.33	1.3865	1861.38	1.5783	2118.87
		73		1.0275	1379.42	1.1994	1610.19	1.3861	1860.84	1.5788	2119.54
		73.0667		1.0302	1383.04	1.1994	1610.19	1.3841	1858.15	1.5783	2118.87
		73.1333		1.0282	1380.36	1.1966	1606.44	1.3878	1863.12	1.5818	2123.57
		73.2		1.0272	1379.02	1.1986	1609.12	1.3855	1860.03	1.5766	2116.59
		73.2667		1.0269	1378.61	1.2004	1611.54	1.3865	1861.38	1.5793	2120.21
		73.3333		1.0297	1382.37	1.1997	1610.6	1.3839	1857.89	1.5767	2116.72
		73.4		1.0294	1381.97	1.1978	1608.05	1.386	1860.7	1.5781	2118.6
		73.4667		1.0276	1379.55	1.1983	1608.72	1.3865	1861.38	1.5788	2119.54
		73.5333		1.0276	1379.55	1.2006	1611.81	1.3885	1864.06	1.5804	2121.69
		73.6		1.029	1381.43	1.1982	1608.58	1.3853	1859.77	1.58	2121.15
		73.6667		1.0257	1377	1.199	1609.66	1.3896	1865.54	1.5774	2117.66
		73.7333		1.0274	1379.28	1.1993	1610.06	1.3851	1859.5	1.5781	2118.6
		73.8		1.0296	1382.24	1.1969	1606.84	1.385	1859.36	1.5795	2120.48
		73.8667		1.0267	1378.34	1.197	1606.97	1.385	1859.36	1.5775	2117.79
		73.9333		1.0258	1377.14	1.1988	1609.39	1.3875	1862.72	1.5798	2120.88
		74		1.0255	1376.73	1.199	1609.66	1.3852	1859.63	1.5763	2116.18
		74.0667		1.0255	1376.73	1.1965	1606.3	1.3859	1860.57	1.5806	2121.96
		74.1333		1.0256	1376.87	1.1994	1610.19	1.3839	1857.89	1.5784	2119
		74.2		1.0266	1378.21	1.1995	1610.33	1.3872	1862.32	1.581	2122.49
		74.2667		1.0269	1378.61	1.1998	1610.73	1.3892	1865	1.5793	2120.21
		74.3333		1.0243	1375.12	1.1969	1606.84	1.3824	1855.87	1.5798	2120.88
		74.4		1.0294	1381.97	1.196	1605.63	1.3844	1858.56	1.5789	2119.67
		74.4667		1.0289	1381.3	1.1967	1606.57	1.3865	1861.38	1.5801	2121.28
		74.5333		1.0281	1380.22	1.1996	1610.46	1.3903	1866.48	1.5835	2125.85
		74.6		1.0288	1381.16	1.199	1609.66	1.3877	1862.99	1.5789	2119.67
		74.6667		1.0263	1377.81	1.1969	1606.84	1.3892	1865	1.5783	2118.87
		74.7333		1.027	1378.75	1.2009	1612.21	1.3835	1857.35	1.5811	2122.63
		74.8		1.0286	1380.9	1.1955	1604.96	1.3894	1865.27	1.577	2117.12
		74.8667		1.0284	1380.63	1.1972	1607.24	1.3879	1863.26	1.5762	2116.05
		74.9333		1.0283	1380.49	1.1997	1610.6	1.3847	1858.96	1.5783	2118.87
		75		1.0281	1380.22	1.1962	1605.9	1.3882	1863.66	1.5814	2123.03
		75.0667		1.0287	1381.03	1.1977	1607.91	1.3886	1864.2	1.5772	2117.39
		75.1333		1.0267	1378.34	1.1969	1606.84	1.387	1862.05	1.5777	2118.06
		75.2		1.0278	1379.82	1.1988	1609.39	1.3872	1862.32	1.5785	2119.14
		75.2667		1.0266	1378.21	1.198	1608.32	1.3838	1857.75	1.5778	2118.2
		75.3333		1.0292	1381.7	1.1969	1606.84	1.3843	1858.42	1.5814	2123.03
		75.4		1.0281	1380.22	1.1979	1608.18	1.385	1859.36	1.579	2119.81
		75.4667		1.0258	1377.14	1.1993	1610.06	1.3848	1859.09	1.5758	2115.51
		75.5333		1.0248	1375.79	1.1966	1606.44	1.382	1855.34	1.5764	2116.32
		75.6		1.0266	1378.21	1.1983	1608.72	1.3876	1862.85	1.5781	2118.6
		75.6667		1.0259	1377.27	1.1985	1608.99	1.3832	1856.95	1.5769	2116.99
		75.7333		1.0268	1378.48	1.1978	1608.05	1.3852	1859.63	1.5766	2116.59
		75.8		1.0257	1377	1.1973	1607.38	1.3857	1860.3	1.58	2121.15
		75.8667		1.0241	1374.85	1.1945	1603.62	1.3846	1858.83	1.5766	2116.59
		75.9333		1.0236	1374.18	1.1975	1607.64	1.3879	1863.26	1.5767	2116.72
		76		1.0276	1379.55	1.1963	1606.03	1.3855	1860.03	1.5775	2117.79
		76.0667		1.0265	1378.08	1.1969	1606.84	1.3867	1861.64	1.5747	2114.03
		76.1333		1.0251	1376.2	1.1955	1604.96	1.3892	1865	1.5767	2116.72
		76.2		1.0252	1376.33	1.1968	1606.7	1.3847	1858.96	1.5779	2118.33
		76.2667		1.0263	1377.81	1.1995	1610.33	1.3887	1864.33	1.5763	2116.18
		76.3333		1.0264	1377.94	1.1979	1608.18	1.3859	1860.57	1.5754	2114.97
		76.4		1.026	1377.4	1.1982	1608.58	1.3873	1862.45	1.5773	2117.53
		76.4667		1.0258	1377.14	1.1975	1607.64	1.3842	1858.29	1.5762	2116.05
		76.5333		1.0259	1377.27	1.198	1608.32	1.3848	1859.09	1.5825	2124.51
		76.6		1.0269	1378.61	1.1972	1607.24	1.3864	1861.24	1.5763	2116.18
		76.6667		1.0268	1378.48	1.197	1606.97	1.3873	1862.45	1.5775	2117.79
		76.7333		1.0258	1377.14	1.1978	1608.05	1.3849	1859.23	1.5747	2114.03
		76.8		1.0276	1379.55	1.1974	1607.51	1.3874	1862.58	1.5742	2113.36
		76.8667		1.0281	1380.22	1.1987	1609.25	1.3878	1863.12	1.5737	2112.69
		76.9333		1.0252	1376.33	1.198	1608.32	1.3848	1859.09	1.5783	2118.87
		77		1.0285	1380.76	1.2002	1611.27	1.3841	1858.15	1.5754	2114.97
		77.0667		1.0263	1377.81	1.1961	1605.76	1.3859	1860.57	1.582	2123.84
		77.1333		1.0265	1378.08	1.1947	1603.88	1.3853	1859.77	1.5764	2116.32
		77.2		1.0298	1382.51	1.1977	1607.91	1.3857	1860.3	1.5761	2115.91
		77.2667		1.0267	1378.34	1.1971	1607.11	1.3858	1860.44	1.5739	2112.96
		77.3333		1.0267	1378.34	1.1983	1608.72	1.3844	1858.56	1.5755	2115.11
		77.4		1.0273	1379.15	1.1991	1609.79	1.3845	1858.69	1.5761	2115.91
		77.4667		1.0278	1379.82	1.1989	1609.52	1.3845	1858.69	1.5776	2117.93
		77.5333		1.0255	1376.73	1.1962	1605.9	1.3878	1863.12	1.5735	2112.42
		77.6		1.0264	1377.94	1.1973	1607.38	1.3863	1861.11	1.5742	2113.36
		77.6667		1.028	1380.09	1.198	1608.32	1.386	1860.7	1.5758	2115.51
		77.7333		1.0255	1376.73	1.1985	1608.99	1.3844	1858.56	1.574	2113.1
		77.8		1.0293	1381.84	1.1972	1607.24	1.3822	1855.6	1.5759	2115.65
		77.8667		1.0267	1378.34	1.1961	1605.76	1.3859	1860.57	1.578	2118.47
		77.9333		1.027	1378.75	1.1968	1606.7	1.3844	1858.56	1.5784	2119
		78		1.0256	1376.87	1.1978	1608.05	1.3837	1857.62	1.5755	2115.11
		78.0667		1.0297	1382.37	1.1972	1607.24	1.3861	1860.84	1.5732	2112.02
		78.1333		1.0262	1377.67	1.1972	1607.24	1.3847	1858.96	1.5759	2115.65
		78.2		1.0263	1377.81	1.1969	1606.84	1.3866	1861.51	1.573	2111.75
		78.2667		1.028	1380.09	1.1977	1607.91	1.3864	1861.24	1.5761	2115.91
		78.3333		1.0271	1378.88	1.1962	1605.9	1.3845	1858.69	1.5749	2114.3
		78.4		1.0261	1377.54	1.1986	1609.12	1.3849	1859.23	1.5762	2116.05
		78.4667		1.0231	1373.51	1.1976	1607.78	1.3849	1859.23	1.5724	2110.95
		78.5333		1.0254	1376.6	1.2001	1611.13	1.3852	1859.63	1.5744	2113.63
		78.6		1.0287	1381.03	1.1998	1610.73	1.3863	1861.11	1.5725	2111.08
		78.6667		1.0238	1374.45	1.199	1609.66	1.3854	1859.9	1.5747	2114.03
		78.7333		1.0239	1374.59	1.1988	1609.39	1.3839	1857.89	1.5744	2113.63
		78.8		1.0285	1380.76	1.1985	1608.99	1.3826	1856.14	1.5765	2116.45
		78.8667		1.0251	1376.2	1.1991	1609.79	1.3844	1858.56	1.5753	2114.84
		78.9333		1.0233	1373.78	1.1998	1610.73	1.3835	1857.35	1.5747	2114.03
		79		1.0257	1377	1.1946	1603.75	1.3835	1857.35	1.5737	2112.69
		79.0667		1.0253	1376.47	1.1951	1604.42	1.3837	1857.62	1.578	2118.47
		79.1333		1.0299	1382.64	1.201	1612.34	1.3814	1854.53	1.5742	2113.36
		79.2		1.0286	1380.9	1.1964	1606.17	1.3874	1862.58	1.5739	2112.96
		79.2667		1.0242	1374.99	1.1967	1606.57	1.3842	1858.29	1.5741	2113.23
		79.3333		1.0264	1377.94	1.1977	1607.91	1.3862	1860.97	1.5752	2114.71
		79.4		1.0288	1381.16	1.1966	1606.44	1.3857	1860.3	1.5749	2114.3
		79.4667		1.0244	1375.26	1.1972	1607.24	1.3851	1859.5	1.5716	2109.87
		79.5333		1.0277	1379.69	1.198	1608.32	1.383	1856.68	1.573	2111.75
		79.6		1.0275	1379.42	1.1972	1607.24	1.3864	1861.24	1.5754	2114.97
		79.6667		1.0276	1379.55	1.197	1606.97	1.3833	1857.08	1.5749	2114.3
		79.7333		1.0265	1378.08	1.1965	1606.3	1.3827	1856.27	1.5739	2112.96
		79.8		1.0261	1377.54	1.1976	1607.78	1.3818	1855.07	1.5727	2111.35
		79.8667		1.0238	1374.45	1.1959	1605.5	1.3836	1857.48	1.5748	2114.17
		79.9333		1.028	1380.09	1.1984	1608.85	1.3816	1854.8	1.5801	2121.28
		80		1.0247	1375.66	1.1906	1598.38	1.3836	1857.48	1.5732	2112.02
		80.0667		1.0262	1377.67	1.1958	1605.36	1.3865	1861.38	1.5757	2115.38
		80.1333		1.0271	1378.88	1.1956	1605.09	1.3846	1858.83	1.5748	2114.17
		80.2		1.0266	1378.21	1.1964	1606.17	1.385	1859.36	1.5744	2113.63
		80.2667		1.0247	1375.66	1.2007	1611.94	1.3814	1854.53	1.5748	2114.17
		80.3333		1.0262	1377.67	1.1968	1606.7	1.3845	1858.69	1.5733	2112.16
		80.4		1.0254	1376.6	1.1983	1608.72	1.3855	1860.03	1.5737	2112.69
		80.4667		1.0271	1378.88	1.199	1609.66	1.3841	1858.15	1.5735	2112.42
		80.5333		1.0277	1379.69	1.1975	1607.64	1.3827	1856.27	1.5739	2112.96
		80.6		1.0255	1376.73	1.197	1606.97	1.387	1862.05	1.577	2117.12
		80.6667		1.0253	1376.47	1.1983	1608.72	1.3881	1863.52	1.5758	2115.51
		80.7333		1.0291	1381.57	1.197	1606.97	1.3846	1858.83	1.5768	2116.85
		80.8		1.0259	1377.27	1.1982	1608.58	1.385	1859.36	1.5772	2117.39
		80.8667		1.0249	1375.93	1.1957	1605.23	1.381	1853.99	1.5739	2112.96
		80.9333		1.0259	1377.27	1.1978	1608.05	1.3866	1861.51	1.5745	2113.77
		81		1.0252	1376.33	1.1973	1607.38	1.386	1860.7	1.5787	2119.4
		81.0667		1.0266	1378.21	1.197	1606.97	1.3836	1857.48	1.5786	2119.27
		81.1333		1.0285	1380.76	1.1968	1606.7	1.3844	1858.56	1.5758	2115.51
		81.2		1.027	1378.75	1.1962	1605.9	1.3868	1861.78	1.5739	2112.96
		81.2667		1.0275	1379.42	1.1969	1606.84	1.3862	1860.97	1.5728	2111.48
		81.3333		1.0253	1376.47	1.1958	1605.36	1.3864	1861.24	1.5724	2110.95
		81.4		1.025	1376.06	1.1955	1604.96	1.3841	1858.15	1.5717	2110.01
		81.4667		1.0245	1375.39	1.197	1606.97	1.385	1859.36	1.5742	2113.36
		81.5333		1.0247	1375.66	1.1956	1605.09	1.383	1856.68	1.5772	2117.39
		81.6		1.0263	1377.81	1.1986	1609.12	1.3824	1855.87	1.5733	2112.16
		81.6667		1.0266	1378.21	1.1964	1606.17	1.3853	1859.77	1.5763	2116.18
		81.7333		1.025	1376.06	1.1951	1604.42	1.3833	1857.08	1.5719	2110.28
		81.8		1.026	1377.4	1.194	1602.94	1.3842	1858.29	1.5724	2110.95
		81.8667		1.0255	1376.73	1.1972	1607.24	1.3853	1859.77	1.5731	2111.89
		81.9333		1.0256	1376.87	1.1971	1607.11	1.3849	1859.23	1.5764	2116.32
		82		1.024	1374.72	1.1962	1605.9	1.3857	1860.3	1.5797	2120.75
		82.0667		1.0272	1379.02	1.197	1606.97	1.3865	1861.38	1.5719	2110.28
		82.1333		1.0261	1377.54	1.1951	1604.42	1.3819	1855.2	1.5727	2111.35
		82.2		1.0219	1371.9	1.198	1608.32	1.3812	1854.26	1.5731	2111.89
		82.2667		1.0253	1376.47	1.1984	1608.85	1.3823	1855.74	1.572	2110.41
		82.3333		1.0264	1377.94	1.1965	1606.3	1.3855	1860.03	1.5726	2111.22
		82.4		1.0266	1378.21	1.1975	1607.64	1.3817	1854.93	1.5736	2112.56
		82.4667		1.0257	1377	1.1978	1608.05	1.3859	1860.57	1.5703	2108.13
		82.5333		1.0282	1380.36	1.1955	1604.96	1.3808	1853.72	1.5736	2112.56
		82.6		1.0278	1379.82	1.1987	1609.25	1.3826	1856.14	1.5721	2110.54
		82.6667		1.0262	1377.67	1.1957	1605.23	1.3816	1854.8	1.5748	2114.17
		82.7333		1.0255	1376.73	1.1967	1606.57	1.3826	1856.14	1.5724	2110.95
		82.8		1.024	1374.72	1.1953	1604.69	1.383	1856.68	1.5729	2111.62
		82.8667		1.0253	1376.47	1.1984	1608.85	1.3837	1857.62	1.5719	2110.28
		82.9333		1.0269	1378.61	1.1967	1606.57	1.3829	1856.54	1.5735	2112.42
		83		1.027	1378.75	1.1958	1605.36	1.3838	1857.75	1.5722	2110.68
		83.0667		1.0244	1375.26	1.1965	1606.3	1.3838	1857.75	1.5736	2112.56
		83.1333		1.025	1376.06	1.197	1606.97	1.3828	1856.41	1.5716	2109.87
		83.2		1.0242	1374.99	1.1942	1603.21	1.3838	1857.75	1.5741	2113.23
		83.2667		1.0256	1376.87	1.1984	1608.85	1.3849	1859.23	1.5731	2111.89
		83.3333		1.0251	1376.2	1.1966	1606.44	1.3816	1854.8	1.5746	2113.9
		83.4		1.0234	1373.91	1.2015	1613.01	1.3827	1856.27	1.5734	2112.29
		83.4667		1.0252	1376.33	1.1947	1603.88	1.386	1860.7	1.5766	2116.59
		83.5333		1.0251	1376.2	1.1967	1606.57	1.3838	1857.75	1.5718	2110.14
		83.6		1.0259	1377.27	1.1944	1603.48	1.3835	1857.35	1.5732	2112.02
		83.6667		1.0266	1378.21	1.196	1605.63	1.3826	1856.14	1.5738	2112.83
		83.7333		1.0248	1375.79	1.1962	1605.9	1.3861	1860.84	1.5746	2113.9
		83.8		1.0258	1377.14	1.1975	1607.64	1.3831	1856.81	1.5725	2111.08
		83.8667		1.0253	1376.47	1.1957	1605.23	1.3849	1859.23	1.5723	2110.81
		83.9333		1.0252	1376.33	1.1951	1604.42	1.383	1856.68	1.5747	2114.03
		84		1.0247	1375.66	1.194	1602.94	1.3837	1857.62	1.5744	2113.63
		84.0667		1.026	1377.4	1.1985	1608.99	1.3843	1858.42	1.5724	2110.95
		84.1333		1.0264	1377.94	1.1989	1609.52	1.3833	1857.08	1.5749	2114.3
		84.2		1.0255	1376.73	1.1952	1604.56	1.3839	1857.89	1.5724	2110.95
		84.2667		1.026	1377.4	1.1953	1604.69	1.3777	1849.56	1.5714	2109.6
		84.3333		1.0272	1379.02	1.1954	1604.82	1.3826	1856.14	1.5729	2111.62
		84.4		1.0235	1374.05	1.1943	1603.35	1.3831	1856.81	1.572	2110.41
		84.4667		1.0246	1375.53	1.1964	1606.17	1.3804	1853.19	1.5718	2110.14
		84.5333		1.0257	1377	1.1933	1602.01	1.3812	1854.26	1.5713	2109.47
		84.6		1.0265	1378.08	1.1942	1603.21	1.3847	1858.96	1.5738	2112.83
		84.6667		1.0248	1375.79	1.1939	1602.81	1.3794	1851.84	1.5745	2113.77
		84.7333		1.0242	1374.99	1.1973	1607.38	1.3861	1860.84	1.5737	2112.69
		84.8		1.0256	1376.87	1.1956	1605.09	1.3812	1854.26	1.5723	2110.81
		84.8667		1.0226	1372.84	1.196	1605.63	1.3818	1855.07	1.5747	2114.03
		84.9333		1.0254	1376.6	1.1958	1605.36	1.3848	1859.09	1.5716	2109.87
		85		1.0267	1378.34	1.1972	1607.24	1.3834	1857.21	1.5723	2110.81
		85.0667		1.026	1377.4	1.1953	1604.69	1.3803	1853.05	1.5763	2116.18
		85.1333		1.0237	1374.32	1.1947	1603.88	1.3809	1853.86	1.5718	2110.14
		85.2		1.0236	1374.18	1.1936	1602.41	1.3797	1852.25	1.5696	2107.19
		85.2667		1.0252	1376.33	1.1942	1603.21	1.3813	1854.4	1.5719	2110.28
		85.3333		1.0253	1376.47	1.1967	1606.57	1.3816	1854.8	1.5742	2113.36
		85.4		1.0281	1380.22	1.1965	1606.3	1.3816	1854.8	1.5722	2110.68
		85.4667		1.0255	1376.73	1.1954	1604.82	1.3821	1855.47	1.5766	2116.59
		85.5333		1.0275	1379.42	1.1952	1604.56	1.3843	1858.42	1.5716	2109.87
		85.6		1.0233	1373.78	1.1971	1607.11	1.3804	1853.19	1.5704	2108.26
		85.6667		1.0252	1376.33	1.196	1605.63	1.3818	1855.07	1.5721	2110.54
		85.7333		1.0232	1373.65	1.1942	1603.21	1.3822	1855.6	1.5725	2111.08
		85.8		1.0258	1377.14	1.1978	1608.05	1.3829	1856.54	1.5715	2109.74
		85.8667		1.0274	1379.28	1.1954	1604.82	1.3795	1851.98	1.5711	2109.2
		85.9333		1.0228	1373.11	1.1962	1605.9	1.3859	1860.57	1.5721	2110.54
		86		1.0267	1378.34	1.1987	1609.25	1.3805	1853.32	1.5689	2106.25
		86.0667		1.026	1377.4	1.198	1608.32	1.382	1855.34	1.5736	2112.56
		86.1333		1.0245	1375.39	1.197	1606.97	1.3864	1861.24	1.5733	2112.16
		86.2		1.0259	1377.27	1.1951	1604.42	1.3841	1858.15	1.5735	2112.42
		86.2667		1.0244	1375.26	1.1951	1604.42	1.3812	1854.26	1.5712	2109.34
		86.3333		1.0231	1373.51	1.1948	1604.02	1.3821	1855.47	1.572	2110.41
		86.4		1.0239	1374.59	1.1977	1607.91	1.3828	1856.41	1.5711	2109.2
		86.4667		1.025	1376.06	1.1966	1606.44	1.3801	1852.78	1.5721	2110.54
		86.5333		1.0257	1377	1.196	1605.63	1.3822	1855.6	1.573	2111.75
		86.6		1.0285	1380.76	1.1969	1606.84	1.3819	1855.2	1.5718	2110.14
		86.6667		1.0248	1375.79	1.1971	1607.11	1.3858	1860.44	1.5711	2109.2
		86.7333		1.0258	1377.14	1.1956	1605.09	1.3798	1852.38	1.5717	2110.01
		86.8		1.0282	1380.36	1.1945	1603.62	1.3801	1852.78	1.5733	2112.16
		86.8667		1.0241	1374.85	1.1945	1603.62	1.3816	1854.8	1.5711	2109.2
		86.9333		1.0245	1375.39	1.1956	1605.09	1.3804	1853.19	1.5698	2107.46
		87		1.0266	1378.21	1.1938	1602.68	1.3825	1856.01	1.5704	2108.26
		87.0667		1.0251	1376.2	1.1986	1609.12	1.3797	1852.25	1.5719	2110.28
		87.1333		1.0282	1380.36	1.1961	1605.76	1.3815	1854.66	1.5703	2108.13
		87.2		1.0254	1376.6	1.1941	1603.08	1.3813	1854.4	1.5738	2112.83
		87.2667		1.0262	1377.67	1.1939	1602.81	1.3845	1858.69	1.5692	2106.65
		87.3333		1.027	1378.75	1.1975	1607.64	1.3804	1853.19	1.5737	2112.69
		87.4		1.0264	1377.94	1.1978	1608.05	1.3808	1853.72	1.5699	2107.59
		87.4667		1.0265	1378.08	1.1957	1605.23	1.3813	1854.4	1.5733	2112.16
		87.5333		1.0248	1375.79	1.1951	1604.42	1.3801	1852.78	1.572	2110.41
		87.6		1.0247	1375.66	1.1975	1607.64	1.3815	1854.66	1.569	2106.38
		87.6667		1.0261	1377.54	1.1968	1606.7	1.3807	1853.59	1.5704	2108.26
		87.7333		1.0242	1374.99	1.1961	1605.76	1.3798	1852.38	1.5791	2119.94
		87.8		1.0264	1377.94	1.1942	1603.21	1.3794	1851.84	1.5725	2111.08
		87.8667		1.0264	1377.94	1.1932	1601.87	1.381	1853.99	1.5722	2110.68
		87.9333		1.0238	1374.45	1.1944	1603.48	1.3817	1854.93	1.5734	2112.29
		88		1.0229	1373.24	1.1957	1605.23	1.3783	1850.37	1.5704	2108.26
		88.0667		1.0241	1374.85	1.1932	1601.87	1.3828	1856.41	1.5722	2110.68
		88.1333		1.0228	1373.11	1.194	1602.94	1.3804	1853.19	1.5696	2107.19
		88.2		1.0242	1374.99	1.1959	1605.5	1.38	1852.65	1.5677	2104.64
		88.2667		1.0243	1375.12	1.1952	1604.56	1.3819	1855.2	1.5702	2107.99
		88.3333		1.0266	1378.21	1.1961	1605.76	1.3824	1855.87	1.5737	2112.69
		88.4		1.025	1376.06	1.194	1602.94	1.3808	1853.72	1.5731	2111.89
		88.4667		1.0253	1376.47	1.1962	1605.9	1.382	1855.34	1.5711	2109.2
		88.5333		1.027	1378.75	1.197	1606.97	1.3811	1854.13	1.5723	2110.81
		88.6		1.0245	1375.39	1.1955	1604.96	1.3795	1851.98	1.5683	2105.44
		88.6667		1.0237	1374.32	1.1972	1607.24	1.3826	1856.14	1.5696	2107.19
		88.7333		1.0238	1374.45	1.1958	1605.36	1.3813	1854.4	1.571	2109.07
		88.8		1.0256	1376.87	1.1956	1605.09	1.38	1852.65	1.571	2109.07
		88.8667		1.0226	1372.84	1.1944	1603.48	1.3816	1854.8	1.567	2103.7
		88.9333		1.026	1377.4	1.1942	1603.21	1.3817	1854.93	1.5693	2106.79
		89		1.0257	1377	1.1972	1607.24	1.381	1853.99	1.5736	2112.56
		89.0667		1.0253	1376.47	1.1933	1602.01	1.3819	1855.2	1.57	2107.72
		89.1333		1.0261	1377.54	1.1971	1607.11	1.3825	1856.01	1.5701	2107.86
		89.2		1.0245	1375.39	1.1909	1598.78	1.38	1852.65	1.5726	2111.22
		89.2667		1.0238	1374.45	1.1952	1604.56	1.3826	1856.14	1.5722	2110.68
		89.3333		1.0268	1378.48	1.1933	1602.01	1.3814	1854.53	1.5697	2107.32
		89.4		1.0262	1377.67	1.1975	1607.64	1.3797	1852.25	1.5711	2109.2
		89.4667		1.0259	1377.27	1.1952	1604.56	1.3798	1852.38	1.5734	2112.29
		89.5333		1.0257	1377	1.1976	1607.78	1.3818	1855.07	1.5741	2113.23
		89.6		1.0239	1374.59	1.1942	1603.21	1.3804	1853.19	1.5689	2106.25
		89.6667		1.025	1376.06	1.1949	1604.15	1.38	1852.65	1.5708	2108.8
		89.7333		1.024	1374.72	1.1943	1603.35	1.3809	1853.86	1.5683	2105.44
		89.8		1.0264	1377.94	1.1941	1603.08	1.3786	1850.77	1.5679	2104.91
		89.8667		1.0254	1376.6	1.1959	1605.5	1.3816	1854.8	1.5718	2110.14
		89.9333		1.0265	1378.08	1.1924	1600.8	1.3796	1852.11	1.5713	2109.47
		90		1.0255	1376.73	1.1954	1604.82	1.3805	1853.32	1.5722	2110.68
		90.0667		1.0274	1379.28	1.1957	1605.23	1.3818	1855.07	1.5707	2108.66
		90.1333		1.0246	1375.53	1.1952	1604.56	1.3794	1851.84	1.5706	2108.53
		90.2		1.0262	1377.67	1.1962	1605.9	1.3849	1859.23	1.5699	2107.59
		90.2667		1.0268	1378.48	1.1949	1604.15	1.3818	1855.07	1.5705	2108.4
		90.3333		1.025	1376.06	1.1934	1602.14	1.3807	1853.59	1.5714	2109.6
		90.4		1.0228	1373.11	1.1954	1604.82	1.3768	1848.35	1.5718	2110.14
		90.4667		1.0251	1376.2	1.1949	1604.15	1.3804	1853.19	1.5719	2110.28
		90.5333		1.0257	1377	1.1959	1605.5	1.3816	1854.8	1.5671	2103.83
		90.6		1.0249	1375.93	1.1963	1606.03	1.3809	1853.86	1.571	2109.07
		90.6667		1.0255	1376.73	1.196	1605.63	1.3791	1851.44	1.569	2106.38
		90.7333		1.0245	1375.39	1.195	1604.29	1.3816	1854.8	1.571	2109.07
		90.8		1.0284	1380.63	1.1961	1605.76	1.3785	1850.64	1.5688	2106.11
		90.8667		1.0246	1375.53	1.1949	1604.15	1.3823	1855.74	1.571	2109.07
		90.9333		1.0271	1378.88	1.1954	1604.82	1.3792	1851.58	1.5699	2107.59
		91		1.0263	1377.81	1.1953	1604.69	1.3793	1851.71	1.5689	2106.25
		91.0667		1.0274	1379.28	1.1948	1604.02	1.3774	1849.16	1.5705	2108.4
		91.1333		1.0248	1375.79	1.1959	1605.5	1.3811	1854.13	1.5725	2111.08
		91.2		1.0268	1378.48	1.1947	1603.88	1.3799	1852.52	1.5697	2107.32
		91.2667		1.0236	1374.18	1.1948	1604.02	1.3798	1852.38	1.5689	2106.25
		91.3333		1.0238	1374.45	1.1969	1606.84	1.3817	1854.93	1.5732	2112.02
		91.4		1.0244	1375.26	1.198	1608.32	1.3823	1855.74	1.5757	2115.38
		91.4667		1.0251	1376.2	1.1947	1603.88	1.3798	1852.38	1.5695	2107.05
		91.5333		1.0248	1375.79	1.1943	1603.35	1.3831	1856.81	1.5715	2109.74
		91.6		1.0295	1382.1	1.1934	1602.14	1.3772	1848.89	1.569	2106.38
		91.6667		1.024	1374.72	1.194	1602.94	1.3777	1849.56	1.5713	2109.47
		91.7333		1.0239	1374.59	1.1947	1603.88	1.3799	1852.52	1.5705	2108.4
		91.8		1.0252	1376.33	1.1949	1604.15	1.3782	1850.23	1.5675	2104.37
		91.8667		1.0243	1375.12	1.1964	1606.17	1.3801	1852.78	1.5691	2106.52
		91.9333		1.0251	1376.2	1.1925	1600.93	1.3792	1851.58	1.5698	2107.46
		92		1.0265	1378.08	1.1936	1602.41	1.3804	1853.19	1.57	2107.72
		92.0667		1.0243	1375.12	1.1938	1602.68	1.3812	1854.26	1.567	2103.7
		92.1333		1.0273	1379.15	1.1984	1608.85	1.3792	1851.58	1.569	2106.38
		92.2		1.0272	1379.02	1.1916	1599.72	1.3805	1853.32	1.57	2107.72
		92.2667		1.0249	1375.93	1.1959	1605.5	1.3793	1851.71	1.5708	2108.8
		92.3333		1.0235	1374.05	1.1943	1603.35	1.3784	1850.5	1.567	2103.7
		92.4		1.023	1373.38	1.1949	1604.15	1.3816	1854.8	1.5686	2105.85
		92.4667		1.0266	1378.21	1.1938	1602.68	1.379	1851.31	1.5685	2105.71
		92.5333		1.0263	1377.81	1.1953	1604.69	1.3811	1854.13	1.5684	2105.58
		92.6		1.0242	1374.99	1.1943	1603.35	1.381	1853.99	1.5691	2106.52
		92.6667		1.0249	1375.93	1.1926	1601.07	1.3799	1852.52	1.5701	2107.86
		92.7333		1.0237	1374.32	1.1931	1601.74	1.3812	1854.26	1.567	2103.7
		92.8		1.0241	1374.85	1.197	1606.97	1.3811	1854.13	1.5663	2102.76
		92.8667		1.0275	1379.42	1.1934	1602.14	1.3813	1854.4	1.5656	2101.82
		92.9333		1.0249	1375.93	1.196	1605.63	1.378	1849.97	1.5684	2105.58
		93		1.0247	1375.66	1.1959	1605.5	1.379	1851.31	1.5723	2110.81
		93.0667		1.0252	1376.33	1.1949	1604.15	1.3792	1851.58	1.5691	2106.52
		93.1333		1.0236	1374.18	1.1928	1601.33	1.3805	1853.32	1.5676	2104.5
		93.2		1.0267	1378.34	1.1922	1600.53	1.3779	1849.83	1.5693	2106.79
		93.2667		1.0262	1377.67	1.1933	1602.01	1.3789	1851.17	1.5701	2107.86
		93.3333		1.0243	1375.12	1.1957	1605.23	1.3787	1850.9	1.5683	2105.44
		93.4		1.0238	1374.45	1.1945	1603.62	1.379	1851.31	1.5682	2105.31
		93.4667		1.0248	1375.79	1.1945	1603.62	1.3814	1854.53	1.5682	2105.31
		93.5333		1.0296	1382.24	1.1941	1603.08	1.3777	1849.56	1.5683	2105.44
		93.6		1.0225	1372.71	1.1955	1604.96	1.3787	1850.9	1.5698	2107.46
		93.6667		1.0243	1375.12	1.1949	1604.15	1.3804	1853.19	1.5674	2104.23
		93.7333		1.0236	1374.18	1.1926	1601.07	1.3786	1850.77	1.5718	2110.14
		93.8		1.0235	1374.05	1.1925	1600.93	1.3781	1850.1	1.5661	2102.49
		93.8667		1.0243	1375.12	1.1928	1601.33	1.3797	1852.25	1.5666	2103.16
		93.9333		1.0241	1374.85	1.1927	1601.2	1.3785	1850.64	1.5681	2105.17
		94		1.0247	1375.66	1.1934	1602.14	1.3771	1848.76	1.5689	2106.25
		94.0667		1.0255	1376.73	1.1939	1602.81	1.3817	1854.93	1.5702	2107.99
		94.1333		1.0239	1374.59	1.1937	1602.54	1.3797	1852.25	1.5677	2104.64
		94.2		1.0256	1376.87	1.1929	1601.47	1.3791	1851.44	1.5673	2104.1
		94.2667		1.0252	1376.33	1.1928	1601.33	1.3772	1848.89	1.5724	2110.95
		94.3333		1.023	1373.38	1.1938	1602.68	1.3785	1850.64	1.5697	2107.32
		94.4		1.0241	1374.85	1.1917	1599.86	1.3804	1853.19	1.5687	2105.98
		94.4667		1.0254	1376.6	1.1919	1600.13	1.3791	1851.44	1.5678	2104.77
		94.5333		1.0235	1374.05	1.1908	1598.65	1.3816	1854.8	1.5674	2104.23
		94.6		1.0239	1374.59	1.192	1600.26	1.3767	1848.22	1.5697	2107.32
		94.6667		1.025	1376.06	1.1934	1602.14	1.3775	1849.29	1.5693	2106.79
		94.7333		1.0246	1375.53	1.1926	1601.07	1.3787	1850.9	1.569	2106.38
		94.8		1.0228	1373.11	1.1916	1599.72	1.3813	1854.4	1.57	2107.72
		94.8667		1.0246	1375.53	1.1915	1599.59	1.3787	1850.9	1.5674	2104.23
		94.9333		1.0254	1376.6	1.1934	1602.14	1.3787	1850.9	1.5697	2107.32
		95		1.0245	1375.39	1.192	1600.26	1.3777	1849.56	1.57	2107.72
		95.0667		1.0249	1375.93	1.1922	1600.53	1.3794	1851.84	1.5682	2105.31
		95.1333		1.0282	1380.36	1.1943	1603.35	1.3772	1848.89	1.5667	2103.29
		95.2		1.0242	1374.99	1.1917	1599.86	1.3775	1849.29	1.5698	2107.46
		95.2667		1.0261	1377.54	1.1929	1601.47	1.3779	1849.83	1.5676	2104.5
		95.3333		1.0257	1377	1.1945	1603.62	1.3792	1851.58	1.5697	2107.32
		95.4		1.0248	1375.79	1.193	1601.6	1.3799	1852.52	1.567	2103.7
		95.4667		1.0251	1376.2	1.1922	1600.53	1.3771	1848.76	1.566	2102.36
		95.5333		1.0234	1373.91	1.1936	1602.41	1.3767	1848.22	1.5673	2104.1
		95.6		1.0249	1375.93	1.1944	1603.48	1.3791	1851.44	1.5682	2105.31
		95.6667		1.0248	1375.79	1.196	1605.63	1.3774	1849.16	1.5714	2109.6
		95.7333		1.0249	1375.93	1.1959	1605.5	1.3771	1848.76	1.5688	2106.11
		95.8		1.0267	1378.34	1.1943	1603.35	1.3796	1852.11	1.5672	2103.97
		95.8667		1.0243	1375.12	1.1926	1601.07	1.3764	1847.82	1.5687	2105.98
		95.9333		1.0245	1375.39	1.1938	1602.68	1.3788	1851.04	1.5666	2103.16
		96		1.0233	1373.78	1.1948	1604.02	1.3773	1849.03	1.5676	2104.5
		96.0667		1.0257	1377	1.1916	1599.72	1.3761	1847.41	1.5653	2101.42
		96.1333		1.0266	1378.21	1.1931	1601.74	1.38	1852.65	1.5654	2101.55
		96.2		1.025	1376.06	1.1934	1602.14	1.379	1851.31	1.5688	2106.11
		96.2667		1.0237	1374.32	1.1916	1599.72	1.3772	1848.89	1.5661	2102.49
		96.3333		1.0256	1376.87	1.195	1604.29	1.3774	1849.16	1.5653	2101.42
		96.4		1.0252	1376.33	1.1935	1602.27	1.3802	1852.92	1.5695	2107.05
		96.4667		1.0258	1377.14	1.1928	1601.33	1.3805	1853.32	1.5678	2104.77
		96.5333		1.0269	1378.61	1.1914	1599.45	1.3824	1855.87	1.5655	2101.68
		96.6		1.0254	1376.6	1.1963	1606.03	1.3802	1852.92	1.5664	2102.89
		96.6667		1.0265	1378.08	1.1933	1602.01	1.3801	1852.78	1.5675	2104.37
		96.7333		1.0219	1371.9	1.1933	1602.01	1.3805	1853.32	1.5655	2101.68
		96.8		1.0243	1375.12	1.1953	1604.69	1.379	1851.31	1.5668	2103.43
		96.8667		1.026	1377.4	1.1915	1599.59	1.3784	1850.5	1.5675	2104.37
		96.9333		1.0233	1373.78	1.1939	1602.81	1.3786	1850.77	1.5686	2105.85
		97		1.0261	1377.54	1.1958	1605.36	1.3786	1850.77	1.5671	2103.83
		97.0667		1.0243	1375.12	1.1919	1600.13	1.3789	1851.17	1.5651	2101.15
		97.1333		1.0246	1375.53	1.1943	1603.35	1.3791	1851.44	1.5662	2102.62
		97.2		1.0249	1375.93	1.1944	1603.48	1.3777	1849.56	1.5691	2106.52
		97.2667		1.0254	1376.6	1.1926	1601.07	1.3762	1847.55	1.5691	2106.52
		97.3333		1.0249	1375.93	1.1933	1602.01	1.3747	1845.53	1.5662	2102.62
		97.4		1.0252	1376.33	1.1966	1606.44	1.3776	1849.43	1.5651	2101.15
		97.4667		1.0229	1373.24	1.1933	1602.01	1.3779	1849.83	1.563	2098.33
		97.5333		1.0257	1377	1.1948	1604.02	1.379	1851.31	1.5668	2103.43
		97.6		1.0243	1375.12	1.1913	1599.32	1.3772	1848.89	1.5668	2103.43
		97.6667		1.0234	1373.91	1.1925	1600.93	1.3795	1851.98	1.5674	2104.23
		97.7333		1.0267	1378.34	1.1955	1604.96	1.3796	1852.11	1.5671	2103.83
		97.8		1.0225	1372.71	1.1914	1599.45	1.3786	1850.77	1.5663	2102.76
		97.8667		1.027	1378.75	1.1922	1600.53	1.3793	1851.71	1.5668	2103.43
		97.9333		1.0247	1375.66	1.1916	1599.72	1.3791	1851.44	1.5677	2104.64
		98		1.0245	1375.39	1.1905	1598.25	1.3787	1850.9	1.5678	2104.77
		98.0667		1.0252	1376.33	1.1921	1600.39	1.3788	1851.04	1.5663	2102.76
		98.1333		1.0268	1378.48	1.1918	1599.99	1.3778	1849.7	1.5674	2104.23
		98.2		1.0273	1379.15	1.1928	1601.33	1.3796	1852.11	1.5685	2105.71
		98.2667		1.0232	1373.65	1.1919	1600.13	1.3766	1848.09	1.5679	2104.91
		98.3333		1.0248	1375.79	1.1919	1600.13	1.382	1855.34	1.5647	2100.61
		98.4		1.0255	1376.73	1.1901	1597.71	1.3767	1848.22	1.566	2102.36
		98.4667		1.0235	1374.05	1.1931	1601.74	1.3745	1845.27	1.5653	2101.42
		98.5333		1.0234	1373.91	1.1924	1600.8	1.3816	1854.8	1.5682	2105.31
		98.6		1.0261	1377.54	1.1898	1597.31	1.3783	1850.37	1.5668	2103.43
		98.6667		1.0227	1372.97	1.1948	1604.02	1.3779	1849.83	1.5669	2103.56
		98.7333		1.0248	1375.79	1.1924	1600.8	1.3801	1852.78	1.5662	2102.62
		98.8		1.0236	1374.18	1.19	1597.58	1.3804	1853.19	1.5647	2100.61
		98.8667		1.0262	1377.67	1.1918	1599.99	1.3771	1848.76	1.5658	2102.09
		98.9333		1.0242	1374.99	1.1906	1598.38	1.3748	1845.67	1.5663	2102.76
		99		1.0255	1376.73	1.193	1601.6	1.3766	1848.09	1.5662	2102.62
		99.0667		1.0239	1374.59	1.1923	1600.66	1.3776	1849.43	1.5702	2107.99
		99.1333		1.0249	1375.93	1.1931	1601.74	1.3762	1847.55	1.5655	2101.68
		99.2		1.0252	1376.33	1.1915	1599.59	1.3773	1849.03	1.5672	2103.97
		99.2667		1.0234	1373.91	1.1919	1600.13	1.3789	1851.17	1.5636	2099.13
		99.3333		1.0253	1376.47	1.1907	1598.51	1.3783	1850.37	1.5649	2100.88
		99.4		1.0259	1377.27	1.1963	1606.03	1.3787	1850.9	1.5656	2101.82
		99.4667		1.0255	1376.73	1.1932	1601.87	1.3783	1850.37	1.5655	2101.68
		99.5333		1.0248	1375.79	1.1915	1599.59	1.3775	1849.29	1.5662	2102.62
		99.6		1.0288	1381.16	1.1918	1599.99	1.3761	1847.41	1.5675	2104.37
		99.6667		1.0265	1378.08	1.1929	1601.47	1.3806	1853.46	1.5654	2101.55
		99.7333		1.024	1374.72	1.1931	1601.74	1.3771	1848.76	1.5675	2104.37
		99.8		1.0262	1377.67	1.1912	1599.19	1.3763	1847.68	1.5682	2105.31
		99.8667		1.0235	1374.05	1.1904	1598.11	1.3757	1846.88	1.5632	2098.6
		99.9333		1.0247	1375.66	1.1948	1604.02	1.3801	1852.78	1.5641	2099.8
		100		1.0228	1373.11	1.1911	1599.05	1.376	1847.28	1.5661	2102.49
		100.067		1.0232	1373.65	1.1921	1600.39	1.3756	1846.74	1.5656	2101.82
		100.133		1.0251	1376.2	1.1927	1601.2	1.3773	1849.03	1.5676	2104.5
		100.2		1.0265	1378.08	1.1907	1598.51	1.3741	1844.73	1.5669	2103.56
		100.267		1.0238	1374.45	1.1926	1601.07	1.3776	1849.43	1.5651	2101.15
		100.333		1.0246	1375.53	1.1909	1598.78	1.376	1847.28	1.5639	2099.54
		100.4		1.0251	1376.2	1.1902	1597.84	1.3774	1849.16	1.5661	2102.49
		100.467		1.0232	1373.65	1.1915	1599.59	1.3768	1848.35	1.5664	2102.89
		100.533		1.0227	1372.97	1.1934	1602.14	1.3791	1851.44	1.5667	2103.29
		100.6		1.0248	1375.79	1.1918	1599.99	1.377	1848.62	1.5658	2102.09
		100.667		1.0257	1377	1.1927	1601.2	1.3759	1847.15	1.5658	2102.09
		100.733		1.0241	1374.85	1.1934	1602.14	1.3754	1846.47	1.5689	2106.25
		100.8		1.0246	1375.53	1.1913	1599.32	1.3762	1847.55	1.5643	2100.07
		100.867		1.0255	1376.73	1.1915	1599.59	1.3754	1846.47	1.5654	2101.55
		100.933		1.0237	1374.32	1.1937	1602.54	1.3774	1849.16	1.5653	2101.42
		101		1.0248	1375.79	1.1917	1599.86	1.3759	1847.15	1.566	2102.36
		101.067		1.0248	1375.79	1.1917	1599.86	1.3773	1849.03	1.5669	2103.56
		101.133		1.0248	1375.79	1.1913	1599.32	1.3786	1850.77	1.5661	2102.49
		101.2		1.0267	1378.34	1.1921	1600.39	1.3783	1850.37	1.5679	2104.91
		101.267		1.0263	1377.81	1.1943	1603.35	1.3771	1848.76	1.5671	2103.83
		101.333		1.0247	1375.66	1.1907	1598.51	1.3778	1849.7	1.5699	2107.59
		101.4		1.0224	1372.57	1.1915	1599.59	1.3757	1846.88	1.5666	2103.16
		101.467		1.0257	1377	1.1931	1601.74	1.3768	1848.35	1.5653	2101.42
		101.533		1.0262	1377.67	1.1917	1599.86	1.3766	1848.09	1.5661	2102.49
		101.6		1.026	1377.4	1.1914	1599.45	1.3786	1850.77	1.5654	2101.55
		101.667		1.0253	1376.47	1.1929	1601.47	1.3792	1851.58	1.5654	2101.55
		101.733		1.0245	1375.39	1.1917	1599.86	1.3785	1850.64	1.5657	2101.95
		101.8		1.0237	1374.32	1.1955	1604.96	1.3748	1845.67	1.5644	2100.21
		101.867		1.0254	1376.6	1.1917	1599.86	1.3772	1848.89	1.5659	2102.22
		101.933		1.024	1374.72	1.1912	1599.19	1.3762	1847.55	1.5653	2101.42
		102		1.0256	1376.87	1.192	1600.26	1.3753	1846.34	1.5665	2103.03
		102.067		1.0244	1375.26	1.1916	1599.72	1.3772	1848.89	1.5637	2099.27
		102.133		1.0251	1376.2	1.1923	1600.66	1.3759	1847.15	1.5639	2099.54
		102.2		1.0274	1379.28	1.1918	1599.99	1.3791	1851.44	1.5639	2099.54
		102.267		1.0236	1374.18	1.1909	1598.78	1.3756	1846.74	1.5674	2104.23
		102.333		1.0251	1376.2	1.1908	1598.65	1.3799	1852.52	1.5658	2102.09
		102.4		1.0249	1375.93	1.1913	1599.32	1.3769	1848.49	1.5665	2103.03
		102.467		1.0273	1379.15	1.1919	1600.13	1.3743	1845	1.5631	2098.46
		102.533		1.0236	1374.18	1.1912	1599.19	1.3786	1850.77	1.562	2096.99
		102.6		1.0257	1377	1.1932	1601.87	1.3773	1849.03	1.565	2101.01
		102.667		1.0228	1373.11	1.1906	1598.38	1.3772	1848.89	1.5639	2099.54
		102.733		1.0229	1373.24	1.1939	1602.81	1.3756	1846.74	1.5646	2100.48
		102.8		1.0279	1379.96	1.1939	1602.81	1.3784	1850.5	1.5663	2102.76
		102.867		1.0251	1376.2	1.1908	1598.65	1.3756	1846.74	1.5639	2099.54
		102.933		1.0252	1376.33	1.1914	1599.45	1.3739	1844.46	1.5661	2102.49
		103		1.0248	1375.79	1.1918	1599.99	1.3757	1846.88	1.564	2099.67
		103.067		1.0217	1371.63	1.191	1598.92	1.3752	1846.21	1.5636	2099.13
		103.133		1.0245	1375.39	1.1929	1601.47	1.3775	1849.29	1.5649	2100.88
		103.2		1.0246	1375.53	1.1903	1597.98	1.3781	1850.1	1.5677	2104.64
		103.267		1.0237	1374.32	1.1902	1597.84	1.3747	1845.53	1.5633	2098.73
		103.333		1.0277	1379.69	1.1925	1600.93	1.3767	1848.22	1.5662	2102.62
		103.4		1.0227	1372.97	1.1914	1599.45	1.3754	1846.47	1.5617	2096.58
		103.467		1.0236	1374.18	1.1891	1596.37	1.3773	1849.03	1.5665	2103.03
		103.533		1.0286	1380.9	1.1913	1599.32	1.3769	1848.49	1.5633	2098.73
		103.6		1.023	1373.38	1.1919	1600.13	1.3756	1846.74	1.5644	2100.21
		103.667		1.0245	1375.39	1.1903	1597.98	1.3756	1846.74	1.5668	2103.43
		103.733		1.0232	1373.65	1.1905	1598.25	1.3742	1844.86	1.5652	2101.28
		103.8		1.0271	1378.88	1.1921	1600.39	1.3737	1844.19	1.5655	2101.68
		103.867		1.0235	1374.05	1.1907	1598.51	1.3748	1845.67	1.5613	2096.05
		103.933		1.0244	1375.26	1.1923	1600.66	1.3747	1845.53	1.5652	2101.28
		104		1.0245	1375.39	1.1928	1601.33	1.3738	1844.33	1.5645	2100.34
		104.067		1.0264	1377.94	1.192	1600.26	1.3754	1846.47	1.5655	2101.68
		104.133		1.0238	1374.45	1.1918	1599.99	1.3742	1844.86	1.564	2099.67
		104.2		1.0254	1376.6	1.1922	1600.53	1.3744	1845.13	1.5631	2098.46
		104.267		1.0249	1375.93	1.1923	1600.66	1.379	1851.31	1.5634	2098.86
		104.333		1.0251	1376.2	1.1919	1600.13	1.3758	1847.01	1.5618	2096.72
		104.4		1.0222	1372.3	1.1906	1598.38	1.3774	1849.16	1.5652	2101.28
		104.467		1.0247	1375.66	1.1918	1599.99	1.3755	1846.61	1.562	2096.99
		104.533		1.0299	1382.64	1.1908	1598.65	1.3755	1846.61	1.5674	2104.23
		104.6		1.0245	1375.39	1.1925	1600.93	1.3744	1845.13	1.5659	2102.22
		104.667		1.0252	1376.33	1.1944	1603.48	1.3743	1845	1.5655	2101.68
		104.733		1.0257	1377	1.1916	1599.72	1.3755	1846.61	1.5631	2098.46
		104.8		1.024	1374.72	1.1947	1603.88	1.3756	1846.74	1.5644	2100.21
		104.867		1.0265	1378.08	1.189	1596.23	1.3791	1851.44	1.5635	2099
		104.933		1.0255	1376.73	1.1899	1597.44	1.3751	1846.07	1.5656	2101.82
		105		1.0245	1375.39	1.1937	1602.54	1.3756	1846.74	1.5662	2102.62
		105.067		1.0243	1375.12	1.1934	1602.14	1.376	1847.28	1.5623	2097.39
		105.133		1.0235	1374.05	1.1949	1604.15	1.3774	1849.16	1.5646	2100.48
		105.2		1.0274	1379.28	1.191	1598.92	1.3768	1848.35	1.5667	2103.29
		105.267		1.0233	1373.78	1.1893	1596.64	1.3744	1845.13	1.566	2102.36
		105.333		1.0226	1372.84	1.1903	1597.98	1.3766	1848.09	1.5658	2102.09
		105.4		1.0256	1376.87	1.1909	1598.78	1.375	1845.94	1.5644	2100.21
		105.467		1.0249	1375.93	1.1907	1598.51	1.3751	1846.07	1.5646	2100.48
		105.533		1.0242	1374.99	1.192	1600.26	1.3758	1847.01	1.5648	2100.74
		105.6		1.0242	1374.99	1.1903	1597.98	1.3742	1844.86	1.564	2099.67
		105.667		1.0231	1373.51	1.1912	1599.19	1.3733	1843.66	1.5633	2098.73
		105.733		1.0246	1375.53	1.1921	1600.39	1.3739	1844.46	1.5647	2100.61
		105.8		1.0265	1378.08	1.1911	1599.05	1.3784	1850.5	1.5605	2094.97
		105.867		1.0218	1371.77	1.1895	1596.9	1.3743	1845	1.5641	2099.8
		105.933		1.0237	1374.32	1.1895	1596.9	1.3752	1846.21	1.5649	2100.88
		106		1.0224	1372.57	1.1892	1596.5	1.3758	1847.01	1.5661	2102.49
		106.067		1.0245	1375.39	1.1913	1599.32	1.376	1847.28	1.5608	2095.37
		106.133		1.0251	1376.2	1.1888	1595.96	1.377	1848.62	1.5637	2099.27
		106.2		1.0252	1376.33	1.1925	1600.93	1.3761	1847.41	1.5628	2098.06
		106.267		1.0248	1375.79	1.1921	1600.39	1.3744	1845.13	1.5626	2097.79
		106.333		1.0239	1374.59	1.1902	1597.84	1.3758	1847.01	1.5643	2100.07
		106.4		1.0235	1374.05	1.1911	1599.05	1.3757	1846.88	1.5634	2098.86
		106.467		1.0226	1372.84	1.1898	1597.31	1.3741	1844.73	1.5616	2096.45
		106.533		1.0244	1375.26	1.191	1598.92	1.3762	1847.55	1.5629	2098.19
		106.6		1.0248	1375.79	1.1911	1599.05	1.3741	1844.73	1.5629	2098.19
		106.667		1.0257	1377	1.1926	1601.07	1.376	1847.28	1.5653	2101.42
		106.733		1.0259	1377.27	1.1889	1596.1	1.3737	1844.19	1.5607	2095.24
		106.8		1.0238	1374.45	1.1906	1598.38	1.3734	1843.79	1.5629	2098.19
		106.867		1.0227	1372.97	1.1892	1596.5	1.3741	1844.73	1.5617	2096.58
		106.933		1.0231	1373.51	1.1913	1599.32	1.3739	1844.46	1.5655	2101.68
		107		1.0231	1373.51	1.1888	1595.96	1.3734	1843.79	1.5646	2100.48
		107.067		1.0261	1377.54	1.1905	1598.25	1.3748	1845.67	1.562	2096.99
		107.133		1.024	1374.72	1.1887	1595.83	1.3771	1848.76	1.5662	2102.62
		107.2		1.0221	1372.17	1.1908	1598.65	1.3753	1846.34	1.5621	2097.12
		107.267		1.0242	1374.99	1.191	1598.92	1.3743	1845	1.561	2095.64
		107.333		1.0234	1373.91	1.1918	1599.99	1.3763	1847.68	1.5618	2096.72
		107.4		1.0261	1377.54	1.1906	1598.38	1.3741	1844.73	1.5608	2095.37
		107.467		1.0233	1373.78	1.1913	1599.32	1.3742	1844.86	1.5607	2095.24
		107.533		1.0253	1376.47	1.1914	1599.45	1.3762	1847.55	1.5633	2098.73
		107.6		1.023	1373.38	1.1887	1595.83	1.3759	1847.15	1.5597	2093.9
		107.667		1.0231	1373.51	1.1954	1604.82	1.3741	1844.73	1.5616	2096.45
		107.733		1.0231	1373.51	1.1908	1598.65	1.3743	1845	1.5605	2094.97
		107.8		1.0212	1370.96	1.1933	1602.01	1.3756	1846.74	1.5613	2096.05
		107.867		1.0259	1377.27	1.1912	1599.19	1.3749	1845.8	1.5607	2095.24
		107.933		1.0237	1374.32	1.1916	1599.72	1.3774	1849.16	1.5617	2096.58
		108		1.0271	1378.88	1.1894	1596.77	1.373	1843.25	1.5625	2097.66
		108.067		1.0223	1372.44	1.1884	1595.43	1.372	1841.91	1.5628	2098.06
		108.133		1.0231	1373.51	1.1891	1596.37	1.3743	1845	1.562	2096.99
		108.2		1.0255	1376.73	1.1915	1599.59	1.373	1843.25	1.5626	2097.79
		108.267		1.0245	1375.39	1.1899	1597.44	1.3758	1847.01	1.563	2098.33
		108.333		1.0213	1371.1	1.1898	1597.31	1.3744	1845.13	1.5621	2097.12
		108.4		1.0232	1373.65	1.1918	1599.99	1.3751	1846.07	1.5659	2102.22
		108.467		1.0245	1375.39	1.1891	1596.37	1.3734	1843.79	1.5616	2096.45
		108.533		1.0239	1374.59	1.1921	1600.39	1.3736	1844.06	1.5654	2101.55
		108.6		1.0221	1372.17	1.1893	1596.64	1.3736	1844.06	1.5619	2096.85
		108.667		1.0242	1374.99	1.1895	1596.9	1.3771	1848.76	1.5652	2101.28
		108.733		1.0259	1377.27	1.1907	1598.51	1.3724	1842.45	1.5616	2096.45
		108.8		1.0275	1379.42	1.1911	1599.05	1.3759	1847.15	1.5617	2096.58
		108.867		1.0233	1373.78	1.1912	1599.19	1.3755	1846.61	1.5605	2094.97
		108.933		1.023	1373.38	1.1923	1600.66	1.3753	1846.34	1.5629	2098.19
		109		1.0231	1373.51	1.1907	1598.51	1.3721	1842.04	1.5626	2097.79
		109.067		1.0258	1377.14	1.1918	1599.99	1.3732	1843.52	1.5647	2100.61
		109.133		1.024	1374.72	1.1885	1595.56	1.3777	1849.56	1.5624	2097.52
		109.2		1.026	1377.4	1.1901	1597.71	1.3752	1846.21	1.5602	2094.57
		109.267		1.0252	1376.33	1.1921	1600.39	1.379	1851.31	1.5621	2097.12
		109.333		1.0236	1374.18	1.1885	1595.56	1.3759	1847.15	1.5633	2098.73
		109.4		1.0233	1373.78	1.191	1598.92	1.3739	1844.46	1.5589	2092.82
		109.467		1.0224	1372.57	1.1886	1595.7	1.3758	1847.01	1.5612	2095.91
		109.533		1.024	1374.72	1.1893	1596.64	1.375	1845.94	1.5583	2092.02
		109.6		1.0237	1374.32	1.1916	1599.72	1.3734	1843.79	1.5649	2100.88
		109.667		1.0254	1376.6	1.1924	1600.8	1.3727	1842.85	1.5606	2095.11
		109.733		1.0251	1376.2	1.191	1598.92	1.373	1843.25	1.5603	2094.7
		109.8		1.0239	1374.59	1.1893	1596.64	1.3738	1844.33	1.5625	2097.66
		109.867		1.0238	1374.45	1.1887	1595.83	1.3741	1844.73	1.5626	2097.79
		109.933		1.0231	1373.51	1.1883	1595.29	1.3739	1844.46	1.5613	2096.05
		110		1.0232	1373.65	1.1905	1598.25	1.3743	1845	1.5626	2097.79
		110.067		1.0219	1371.9	1.1888	1595.96	1.3755	1846.61	1.5604	2094.84
		110.133		1.0238	1374.45	1.1891	1596.37	1.3743	1845	1.5632	2098.6
		110.2		1.0212	1370.96	1.1894	1596.77	1.3728	1842.98	1.5611	2095.78
		110.267		1.0227	1372.97	1.1904	1598.11	1.3754	1846.47	1.5602	2094.57
		110.333		1.0241	1374.85	1.1916	1599.72	1.3737	1844.19	1.5588	2092.69
		110.4		1.0223	1372.44	1.1903	1597.98	1.3746	1845.4	1.5611	2095.78
		110.467		1.0243	1375.12	1.1929	1601.47	1.3743	1845	1.56	2094.3
		110.533		1.0242	1374.99	1.1912	1599.19	1.374	1844.6	1.5611	2095.78
		110.6		1.0274	1379.28	1.1892	1596.5	1.3737	1844.19	1.5594	2093.49
		110.667		1.0225	1372.71	1.1905	1598.25	1.3746	1845.4	1.5631	2098.46
		110.733		1.022	1372.04	1.1896	1597.04	1.3754	1846.47	1.5606	2095.11
		110.8		1.022	1372.04	1.1895	1596.9	1.3749	1845.8	1.5634	2098.86
		110.867		1.0225	1372.71	1.1906	1598.38	1.3742	1844.86	1.5629	2098.19
		110.933		1.0245	1375.39	1.1909	1598.78	1.372	1841.91	1.5578	2091.35
		111		1.0237	1374.32	1.1928	1601.33	1.3726	1842.72	1.5608	2095.37
		111.067		1.0212	1370.96	1.1909	1598.78	1.373	1843.25	1.5632	2098.6
		111.133		1.0251	1376.2	1.1913	1599.32	1.3742	1844.86	1.5592	2093.23
		111.2		1.0235	1374.05	1.19	1597.58	1.3716	1841.37	1.5632	2098.6
		111.267		1.0224	1372.57	1.189	1596.23	1.3741	1844.73	1.562	2096.99
		111.333		1.0224	1372.57	1.1917	1599.86	1.375	1845.94	1.5605	2094.97
		111.4		1.025	1376.06	1.1898	1597.31	1.374	1844.6	1.5601	2094.43
		111.467		1.0247	1375.66	1.1906	1598.38	1.3722	1842.18	1.5614	2096.18
		111.533		1.0224	1372.57	1.1921	1600.39	1.3736	1844.06	1.5603	2094.7
		111.6		1.025	1376.06	1.1898	1597.31	1.3715	1841.24	1.5625	2097.66
		111.667		1.0263	1377.81	1.1901	1597.71	1.3729	1843.12	1.5626	2097.79
		111.733		1.0228	1373.11	1.1924	1600.8	1.3727	1842.85	1.5584	2092.15
		111.8		1.022	1372.04	1.1908	1598.65	1.3765	1847.95	1.5596	2093.76
		111.867		1.0236	1374.18	1.1893	1596.64	1.372	1841.91	1.5649	2100.88
		111.933		1.0246	1375.53	1.1914	1599.45	1.3719	1841.78	1.5628	2098.06
		112		1.0223	1372.44	1.1891	1596.37	1.3745	1845.27	1.5644	2100.21
		112.067		1.0211	1370.83	1.1887	1595.83	1.372	1841.91	1.5593	2093.36
		112.133		1.0269	1378.61	1.1873	1593.95	1.3714	1841.1	1.5623	2097.39
		112.2		1.0239	1374.59	1.1928	1601.33	1.3723	1842.31	1.5586	2092.42
		112.267		1.025	1376.06	1.1904	1598.11	1.3702	1839.49	1.5593	2093.36
		112.333		1.0271	1378.88	1.1875	1594.22	1.3721	1842.04	1.5589	2092.82
		112.4		1.0238	1374.45	1.1908	1598.65	1.3716	1841.37	1.5607	2095.24
		112.467		1.0257	1377	1.1909	1598.78	1.3731	1843.39	1.5618	2096.72
		112.533		1.0236	1374.18	1.1893	1596.64	1.3736	1844.06	1.5626	2097.79
		112.6		1.0228	1373.11	1.1917	1599.86	1.3755	1846.61	1.5633	2098.73
		112.667		1.0253	1376.47	1.1926	1601.07	1.3757	1846.88	1.5602	2094.57
		112.733		1.024	1374.72	1.1892	1596.5	1.3709	1840.43	1.5614	2096.18
		112.8		1.0239	1374.59	1.1923	1600.66	1.3727	1842.85	1.5646	2100.48
		112.867		1.0229	1373.24	1.1896	1597.04	1.3756	1846.74	1.5605	2094.97
		112.933		1.0225	1372.71	1.1904	1598.11	1.3739	1844.46	1.5624	2097.52
		113		1.0223	1372.44	1.1887	1595.83	1.3751	1846.07	1.5605	2094.97
		113.067		1.0236	1374.18	1.1887	1595.83	1.3729	1843.12	1.5598	2094.03
		113.133		1.0236	1374.18	1.1923	1600.66	1.3719	1841.78	1.5624	2097.52
		113.2		1.0224	1372.57	1.1892	1596.5	1.3742	1844.86	1.5618	2096.72
		113.267		1.0248	1375.79	1.1907	1598.51	1.3696	1838.69	1.5589	2092.82
		113.333		1.0207	1370.29	1.1909	1598.78	1.3723	1842.31	1.5597	2093.9
		113.4		1.0199	1369.22	1.1873	1593.95	1.3764	1847.82	1.5612	2095.91
		113.467		1.0215	1371.36	1.1883	1595.29	1.3743	1845	1.5578	2091.35
		113.533		1.0226	1372.84	1.1907	1598.51	1.3731	1843.39	1.5594	2093.49
		113.6		1.0214	1371.23	1.1904	1598.11	1.3716	1841.37	1.56	2094.3
		113.667		1.0231	1373.51	1.1886	1595.7	1.3726	1842.72	1.5572	2090.54
		113.733		1.022	1372.04	1.1898	1597.31	1.3753	1846.34	1.5589	2092.82
		113.8		1.0229	1373.24	1.1919	1600.13	1.3725	1842.58	1.5625	2097.66
		113.867		1.0223	1372.44	1.19	1597.58	1.3745	1845.27	1.5601	2094.43
		113.933		1.0232	1373.65	1.19	1597.58	1.377	1848.62	1.5599	2094.17
		114		1.0253	1376.47	1.1915	1599.59	1.3738	1844.33	1.5572	2090.54
		114.067		1.0237	1374.32	1.1881	1595.02	1.3717	1841.51	1.5593	2093.36
		114.133		1.0239	1374.59	1.1887	1595.83	1.3747	1845.53	1.5628	2098.06
		114.2		1.0233	1373.78	1.1892	1596.5	1.3723	1842.31	1.5584	2092.15
		114.267		1.0226	1372.84	1.1902	1597.84	1.3724	1842.45	1.5591	2093.09
		114.333		1.0225	1372.71	1.1881	1595.02	1.3739	1844.46	1.5609	2095.51
		114.4		1.0238	1374.45	1.1892	1596.5	1.372	1841.91	1.5561	2089.06
		114.467		1.0236	1374.18	1.188	1594.89	1.3739	1844.46	1.5598	2094.03
		114.533		1.0222	1372.3	1.1899	1597.44	1.3717	1841.51	1.5593	2093.36
		114.6		1.0243	1375.12	1.189	1596.23	1.3716	1841.37	1.5624	2097.52
		114.667		1.0246	1375.53	1.1868	1593.28	1.3764	1847.82	1.5608	2095.37
		114.733		1.0263	1377.81	1.1884	1595.43	1.3707	1840.16	1.5585	2092.29
		114.8		1.0258	1377.14	1.1905	1598.25	1.3706	1840.03	1.5601	2094.43
		114.867		1.0232	1373.65	1.1862	1592.47	1.3721	1842.04	1.5599	2094.17
		114.933		1.0247	1375.66	1.1893	1596.64	1.3763	1847.68	1.5583	2092.02
		115		1.0232	1373.65	1.1883	1595.29	1.3698	1838.96	1.5573	2090.68
		115.067		1.0225	1372.71	1.1891	1596.37	1.3729	1843.12	1.5602	2094.57
		115.133		1.0206	1370.16	1.1895	1596.9	1.372	1841.91	1.5609	2095.51
		115.2		1.0241	1374.85	1.1892	1596.5	1.3735	1843.92	1.5562	2089.2
		115.267		1.0226	1372.84	1.189	1596.23	1.3723	1842.31	1.5573	2090.68
		115.333		1.0229	1373.24	1.1915	1599.59	1.3729	1843.12	1.5595	2093.63
		115.4		1.0224	1372.57	1.1894	1596.77	1.3707	1840.16	1.5588	2092.69
		115.467		1.0246	1375.53	1.1886	1595.7	1.3712	1840.84	1.5607	2095.24
		115.533		1.023	1373.38	1.1876	1594.35	1.3706	1840.03	1.5585	2092.29
		115.6		1.0233	1373.78	1.1886	1595.7	1.3716	1841.37	1.5602	2094.57
		115.667		1.0231	1373.51	1.1919	1600.13	1.3697	1838.82	1.5579	2091.48
		115.733		1.023	1373.38	1.1933	1602.01	1.3718	1841.64	1.5598	2094.03
		115.8		1.0235	1374.05	1.1885	1595.56	1.3724	1842.45	1.5653	2101.42
		115.867		1.0227	1372.97	1.1897	1597.17	1.3709	1840.43	1.5586	2092.42
		115.933		1.0226	1372.84	1.1907	1598.51	1.3708	1840.3	1.5611	2095.78
		116		1.0226	1372.84	1.1896	1597.04	1.3724	1842.45	1.5608	2095.37
		116.067		1.0235	1374.05	1.1903	1597.98	1.3713	1840.97	1.561	2095.64
		116.133		1.0215	1371.36	1.1899	1597.44	1.3702	1839.49	1.56	2094.3
		116.2		1.0209	1370.56	1.189	1596.23	1.3727	1842.85	1.5595	2093.63
		116.267		1.0251	1376.2	1.1875	1594.22	1.3734	1843.79	1.5598	2094.03
		116.333		1.0225	1372.71	1.1898	1597.31	1.3717	1841.51	1.5611	2095.78
		116.4		1.0231	1373.51	1.1929	1601.47	1.3688	1837.61	1.5602	2094.57
		116.467		1.0244	1375.26	1.1882	1595.16	1.3698	1838.96	1.5584	2092.15
		116.533		1.024	1374.72	1.1893	1596.64	1.3731	1843.39	1.5592	2093.23
		116.6		1.0252	1376.33	1.1914	1599.45	1.3714	1841.1	1.5611	2095.78
		116.667		1.0227	1372.97	1.1919	1600.13	1.3702	1839.49	1.5589	2092.82
		116.733		1.0222	1372.3	1.1885	1595.56	1.3716	1841.37	1.559	2092.96
		116.8		1.0252	1376.33	1.1917	1599.86	1.371	1840.57	1.5573	2090.68
		116.867		1.022	1372.04	1.1894	1596.77	1.3741	1844.73	1.5576	2091.08
		116.933		1.0219	1371.9	1.1907	1598.51	1.3726	1842.72	1.5598	2094.03
		117		1.024	1374.72	1.1892	1596.5	1.3715	1841.24	1.5618	2096.72
		117.067		1.0219	1371.9	1.1883	1595.29	1.3718	1841.64	1.5584	2092.15
		117.133		1.0229	1373.24	1.189	1596.23	1.3737	1844.19	1.557	2090.27
		117.2		1.0227	1372.97	1.1873	1593.95	1.3725	1842.58	1.5572	2090.54
		117.267		1.0247	1375.66	1.1879	1594.76	1.3701	1839.36	1.5621	2097.12
		117.333		1.0253	1376.47	1.188	1594.89	1.3729	1843.12	1.5577	2091.21
		117.4		1.0236	1374.18	1.19	1597.58	1.3726	1842.72	1.5589	2092.82
		117.467		1.0257	1377	1.1887	1595.83	1.3706	1840.03	1.5612	2095.91
		117.533		1.0228	1373.11	1.1885	1595.56	1.3724	1842.45	1.5569	2090.14
		117.6		1.0236	1374.18	1.1876	1594.35	1.3699	1839.09	1.558	2091.62
		117.667		1.0242	1374.99	1.1899	1597.44	1.3724	1842.45	1.5583	2092.02
		117.733		1.024	1374.72	1.1883	1595.29	1.3717	1841.51	1.5604	2094.84
		117.8		1.0228	1373.11	1.1895	1596.9	1.3729	1843.12	1.5582	2091.88
		117.867		1.0227	1372.97	1.1883	1595.29	1.3732	1843.52	1.5567	2089.87
		117.933		1.0224	1372.57	1.189	1596.23	1.3723	1842.31	1.5555	2088.26
		118		1.0228	1373.11	1.1887	1595.83	1.3756	1846.74	1.5575	2090.94
		118.067		1.0227	1372.97	1.1862	1592.47	1.3735	1843.92	1.5595	2093.63
		118.133		1.0235	1374.05	1.1895	1596.9	1.371	1840.57	1.5589	2092.82
		118.2		1.0229	1373.24	1.189	1596.23	1.3722	1842.18	1.5578	2091.35
		118.267		1.0237	1374.32	1.19	1597.58	1.3726	1842.72	1.5565	2089.6
		118.333		1.0248	1375.79	1.1894	1596.77	1.3695	1838.55	1.5594	2093.49
		118.4		1.0207	1370.29	1.1891	1596.37	1.3688	1837.61	1.5597	2093.9
		118.467		1.0194	1368.54	1.1898	1597.31	1.3697	1838.82	1.5576	2091.08
		118.533		1.0257	1377	1.1895	1596.9	1.3706	1840.03	1.5566	2089.74
		118.6		1.0227	1372.97	1.1893	1596.64	1.3706	1840.03	1.5583	2092.02
		118.667		1.0237	1374.32	1.1911	1599.05	1.3723	1842.31	1.5572	2090.54
		118.733		1.023	1373.38	1.187	1593.55	1.3689	1837.75	1.5598	2094.03
		118.8		1.0217	1371.63	1.1888	1595.96	1.3715	1841.24	1.5589	2092.82
		118.867		1.025	1376.06	1.1885	1595.56	1.3696	1838.69	1.5559	2088.8
		118.933		1.0235	1374.05	1.1912	1599.19	1.3723	1842.31	1.5591	2093.09
		119		1.0264	1377.94	1.1873	1593.95	1.3691	1838.02	1.5563	2089.33
		119.067		1.024	1374.72	1.1888	1595.96	1.3732	1843.52	1.5613	2096.05
		119.133		1.0242	1374.99	1.1897	1597.17	1.3729	1843.12	1.5563	2089.33
		119.2		1.0229	1373.24	1.1871	1593.68	1.3713	1840.97	1.556	2088.93
		119.267		1.0232	1373.65	1.1897	1597.17	1.3692	1838.15	1.5594	2093.49
		119.333		1.0227	1372.97	1.1875	1594.22	1.3731	1843.39	1.5577	2091.21
		119.4		1.023	1373.38	1.1913	1599.32	1.3707	1840.16	1.5583	2092.02
		119.467		1.0242	1374.99	1.1888	1595.96	1.3692	1838.15	1.5588	2092.69
		119.533		1.0216	1371.5	1.1871	1593.68	1.37	1839.23	1.5587	2092.55
		119.6		1.0241	1374.85	1.1873	1593.95	1.3733	1843.66	1.5596	2093.76
		119.667		1.0267	1378.34	1.1906	1598.38	1.3696	1838.69	1.5568	2090
		119.733		1.0238	1374.45	1.1885	1595.56	1.3744	1845.13	1.5567	2089.87
		119.8		1.0243	1375.12	1.1883	1595.29	1.3711	1840.7	1.5559	2088.8
		119.867		1.0244	1375.26	1.1859	1592.07	1.3689	1837.75	1.5563	2089.33
		119.933		1.0232	1373.65	1.1904	1598.11	1.3703	1839.63	1.5565	2089.6
		120		1.0231	1373.51	1.1901	1597.71	1.3728	1842.98	1.5575	2090.94
		120.067		1.0233	1373.78	1.1883	1595.29	1.3725	1842.58	1.5585	2092.29
		120.133		1.0232	1373.65	1.189	1596.23	1.369	1837.88	1.5553	2087.99
		120.2		1.0234	1373.91	1.1882	1595.16	1.3694	1838.42	1.5573	2090.68
		120.267		1.0235	1374.05	1.1878	1594.62	1.3712	1840.84	1.5582	2091.88
		120.333		1.0257	1377	1.1878	1594.62	1.3724	1842.45	1.556	2088.93
		120.4		1.0271	1378.88	1.1902	1597.84	1.37	1839.23	1.5586	2092.42
		120.467		1.0232	1373.65	1.1902	1597.84	1.3696	1838.69	1.5555	2088.26
		120.533		1.0218	1371.77	1.1889	1596.1	1.3694	1838.42	1.5561	2089.06
		120.6		1.0254	1376.6	1.1908	1598.65	1.3737	1844.19	1.5582	2091.88
		120.667		1.0223	1372.44	1.1887	1595.83	1.371	1840.57	1.556	2088.93
		120.733		1.0249	1375.93	1.1892	1596.5	1.3682	1836.81	1.5559	2088.8
		120.8		1.0222	1372.3	1.1898	1597.31	1.3727	1842.85	1.5574	2090.81
		120.867		1.0238	1374.45	1.1892	1596.5	1.3674	1835.73	1.559	2092.96
		120.933		1.0242	1374.99	1.1895	1596.9	1.3722	1842.18	1.5561	2089.06
		121		1.022	1372.04	1.189	1596.23	1.3727	1842.85	1.5569	2090.14
		121.067		1.0244	1375.26	1.1882	1595.16	1.3685	1837.21	1.5556	2088.39
		121.133		1.0239	1374.59	1.1863	1592.61	1.3693	1838.29	1.5579	2091.48
		121.2		1.0228	1373.11	1.1885	1595.56	1.3694	1838.42	1.5552	2087.86
		121.267		1.0219	1371.9	1.1889	1596.1	1.3722	1842.18	1.5581	2091.75
		121.333		1.0247	1375.66	1.1875	1594.22	1.3688	1837.61	1.5551	2087.72
		121.4		1.0255	1376.73	1.189	1596.23	1.3697	1838.82	1.5597	2093.9
		121.467		1.0254	1376.6	1.1856	1591.67	1.3681	1836.67	1.5552	2087.86
		121.533		1.0248	1375.79	1.1896	1597.04	1.3703	1839.63	1.5588	2092.69
		121.6		1.0227	1372.97	1.189	1596.23	1.3693	1838.29	1.5594	2093.49
		121.667		1.0232	1373.65	1.1881	1595.02	1.3725	1842.58	1.5545	2086.92
		121.733		1.0213	1371.1	1.1878	1594.62	1.374	1844.6	1.555	2087.59
		121.8		1.0222	1372.3	1.1893	1596.64	1.3694	1838.42	1.5563	2089.33
		121.867		1.0243	1375.12	1.1868	1593.28	1.3713	1840.97	1.5567	2089.87
		121.933		1.0248	1375.79	1.1861	1592.34	1.3707	1840.16	1.5594	2093.49
		122		1.0238	1374.45	1.1886	1595.7	1.3666	1834.66	1.5562	2089.2
		122.067		1.0212	1370.96	1.1874	1594.08	1.3702	1839.49	1.5557	2088.53
		122.133		1.0235	1374.05	1.1871	1593.68	1.369	1837.88	1.5537	2085.84
		122.2		1.0217	1371.63	1.1885	1595.56	1.3686	1837.35	1.555	2087.59
		122.267		1.0253	1376.47	1.188	1594.89	1.3737	1844.19	1.5545	2086.92
		122.333		1.0237	1374.32	1.1894	1596.77	1.3684	1837.08	1.5556	2088.39
		122.4		1.0233	1373.78	1.1904	1598.11	1.3692	1838.15	1.5568	2090
		122.467		1.0238	1374.45	1.1872	1593.82	1.3724	1842.45	1.5575	2090.94
		122.533		1.023	1373.38	1.1847	1590.46	1.369	1837.88	1.5581	2091.75
		122.6		1.0245	1375.39	1.1883	1595.29	1.3712	1840.84	1.5557	2088.53
		122.667		1.0243	1375.12	1.1871	1593.68	1.3689	1837.75	1.5559	2088.8
		122.733		1.0231	1373.51	1.1876	1594.35	1.3684	1837.08	1.5541	2086.38
		122.8		1.0251	1376.2	1.1854	1591.4	1.3715	1841.24	1.5535	2085.57
		122.867		1.0241	1374.85	1.1866	1593.01	1.3708	1840.3	1.5559	2088.8
		122.933		1.0228	1373.11	1.188	1594.89	1.3697	1838.82	1.5561	2089.06
		123		1.0212	1370.96	1.1859	1592.07	1.3684	1837.08	1.556	2088.93
		123.067		1.0205	1370.02	1.1869	1593.41	1.3683	1836.94	1.555	2087.59
		123.133		1.0247	1375.66	1.1873	1593.95	1.3691	1838.02	1.5565	2089.6
		123.2		1.0218	1371.77	1.1875	1594.22	1.3694	1838.42	1.5557	2088.53
		123.267		1.0252	1376.33	1.1889	1596.1	1.3743	1845	1.5539	2086.11
		123.333		1.024	1374.72	1.1894	1596.77	1.3681	1836.67	1.5544	2086.78
		123.4		1.026	1377.4	1.1869	1593.41	1.3689	1837.75	1.5565	2089.6
		123.467		1.0218	1371.77	1.186	1592.2	1.3706	1840.03	1.5567	2089.87
		123.533		1.0241	1374.85	1.1875	1594.22	1.3735	1843.92	1.5544	2086.78
		123.6		1.0225	1372.71	1.1874	1594.08	1.3701	1839.36	1.5566	2089.74
		123.667		1.0221	1372.17	1.1884	1595.43	1.3705	1839.9	1.5565	2089.6
		123.733		1.0241	1374.85	1.1889	1596.1	1.3692	1838.15	1.5542	2086.51
		123.8		1.0268	1378.48	1.189	1596.23	1.3704	1839.76	1.5565	2089.6
		123.867		1.0252	1376.33	1.1879	1594.76	1.3697	1838.82	1.5552	2087.86
		123.933		1.0234	1373.91	1.1853	1591.27	1.372	1841.91	1.5551	2087.72
		124		1.0221	1372.17	1.1917	1599.86	1.3691	1838.02	1.5546	2087.05
		124.067		1.0219	1371.9	1.1873	1593.95	1.3676	1836	1.5539	2086.11
		124.133		1.0219	1371.9	1.1856	1591.67	1.369	1837.88	1.5565	2089.6
		124.2		1.0217	1371.63	1.1897	1597.17	1.3706	1840.03	1.5564	2089.47
		124.267		1.0229	1373.24	1.1883	1595.29	1.3686	1837.35	1.5557	2088.53
		124.333		1.0213	1371.1	1.1868	1593.28	1.3743	1845	1.5546	2087.05
		124.4		1.0234	1373.91	1.1854	1591.4	1.371	1840.57	1.5572	2090.54
		124.467		1.021	1370.69	1.1885	1595.56	1.3704	1839.76	1.5549	2087.45
		124.533		1.0245	1375.39	1.1866	1593.01	1.3689	1837.75	1.5574	2090.81
		124.6		1.0221	1372.17	1.1865	1592.88	1.3684	1837.08	1.5562	2089.2
		124.667		1.0218	1371.77	1.188	1594.89	1.3713	1840.97	1.5537	2085.84
		124.733		1.0266	1378.21	1.1881	1595.02	1.3674	1835.73	1.5549	2087.45
		124.8		1.022	1372.04	1.1866	1593.01	1.3696	1838.69	1.5573	2090.68
		124.867		1.0233	1373.78	1.1886	1595.7	1.369	1837.88	1.5538	2085.98
		124.933		1.0204	1369.89	1.19	1597.58	1.3684	1837.08	1.5576	2091.08
		125		1.0216	1371.5	1.188	1594.89	1.3688	1837.61	1.5535	2085.57
		125.067		1.0232	1373.65	1.1865	1592.88	1.3697	1838.82	1.5571	2090.41
		125.133		1.0213	1371.1	1.1898	1597.31	1.3687	1837.48	1.5542	2086.51
		125.2		1.0234	1373.91	1.1865	1592.88	1.3684	1837.08	1.5516	2083.02
		125.267		1.0237	1374.32	1.1867	1593.14	1.3711	1840.7	1.5555	2088.26
		125.333		1.0244	1375.26	1.1861	1592.34	1.3705	1839.9	1.5586	2092.42
		125.4		1.0227	1372.97	1.1869	1593.41	1.3678	1836.27	1.5569	2090.14
		125.467		1.0229	1373.24	1.1874	1594.08	1.3693	1838.29	1.5547	2087.18
		125.533		1.0235	1374.05	1.1874	1594.08	1.3679	1836.41	1.5532	2085.17
		125.6		1.0216	1371.5	1.1874	1594.08	1.3681	1836.67	1.5555	2088.26
		125.667		1.0232	1373.65	1.1913	1599.32	1.3706	1840.03	1.5547	2087.18
		125.733		1.0237	1374.32	1.1901	1597.71	1.3679	1836.41	1.5538	2085.98
		125.8		1.0203	1369.75	1.1863	1592.61	1.3683	1836.94	1.552	2083.56
		125.867		1.0245	1375.39	1.1876	1594.35	1.3688	1837.61	1.5551	2087.72
		125.933		1.0215	1371.36	1.186	1592.2	1.3707	1840.16	1.555	2087.59
		126		1.0215	1371.36	1.1893	1596.64	1.3693	1838.29	1.5526	2084.37
		126.067		1.0223	1372.44	1.1877	1594.49	1.3685	1837.21	1.5547	2087.18
		126.133		1.0214	1371.23	1.1855	1591.53	1.3719	1841.78	1.5539	2086.11
		126.2		1.0268	1378.48	1.1864	1592.74	1.3674	1835.73	1.5554	2088.12
		126.267		1.0217	1371.63	1.1876	1594.35	1.3696	1838.69	1.556	2088.93
		126.333		1.0197	1368.95	1.1895	1596.9	1.3676	1836	1.5571	2090.41
		126.4		1.0236	1374.18	1.1852	1591.13	1.3698	1838.96	1.5556	2088.39
		126.467		1.0221	1372.17	1.186	1592.2	1.3667	1834.79	1.5578	2091.35
		126.533		1.0243	1375.12	1.1869	1593.41	1.3679	1836.41	1.5528	2084.63
		126.6		1.0218	1371.77	1.1866	1593.01	1.3666	1834.66	1.5532	2085.17
		126.667		1.0228	1373.11	1.1896	1597.04	1.3678	1836.27	1.5547	2087.18
		126.733		1.0228	1373.11	1.1866	1593.01	1.3678	1836.27	1.5552	2087.86
		126.8		1.024	1374.72	1.1891	1596.37	1.3692	1838.15	1.5561	2089.06
		126.867		1.0199	1369.22	1.1876	1594.35	1.3665	1834.53	1.5551	2087.72
		126.933		1.0192	1368.28	1.1865	1592.88	1.3675	1835.87	1.5569	2090.14
		127		1.0243	1375.12	1.1867	1593.14	1.3689	1837.75	1.5579	2091.48
		127.067		1.0234	1373.91	1.1864	1592.74	1.3667	1834.79	1.5496	2080.34
		127.133		1.0213	1371.1	1.1852	1591.13	1.3687	1837.48	1.554	2086.24
		127.2		1.0207	1370.29	1.1869	1593.41	1.3689	1837.75	1.5539	2086.11
		127.267		1.0217	1371.63	1.1867	1593.14	1.3663	1834.26	1.5562	2089.2
		127.333		1.0232	1373.65	1.1845	1590.19	1.3687	1837.48	1.5532	2085.17
		127.4		1.0239	1374.59	1.1878	1594.62	1.3675	1835.87	1.5533	2085.31
		127.467		1.0256	1376.87	1.1879	1594.76	1.3668	1834.93	1.5556	2088.39
		127.533		1.0226	1372.84	1.1872	1593.82	1.3668	1834.93	1.555	2087.59
		127.6		1.0238	1374.45	1.1866	1593.01	1.3685	1837.21	1.5542	2086.51
		127.667		1.0253	1376.47	1.186	1592.2	1.3683	1836.94	1.5552	2087.86
		127.733		1.0224	1372.57	1.1858	1591.94	1.3695	1838.55	1.556	2088.93
		127.8		1.0249	1375.93	1.1882	1595.16	1.3693	1838.29	1.552	2083.56
		127.867		1.0267	1378.34	1.1861	1592.34	1.3709	1840.43	1.5575	2090.94
		127.933		1.0212	1370.96	1.1876	1594.35	1.3712	1840.84	1.5535	2085.57
		128		1.0213	1371.1	1.1872	1593.82	1.3673	1835.6	1.5545	2086.92
		128.067		1.0253	1376.47	1.1881	1595.02	1.3691	1838.02	1.5525	2084.23
		128.133		1.0265	1378.08	1.1869	1593.41	1.3696	1838.69	1.5555	2088.26
		128.2		1.024	1374.72	1.1892	1596.5	1.3714	1841.1	1.5569	2090.14
		128.267		1.0228	1373.11	1.1896	1597.04	1.3676	1836	1.5533	2085.31
		128.333		1.0249	1375.93	1.191	1598.92	1.3676	1836	1.557	2090.27
		128.4		1.0202	1369.62	1.1865	1592.88	1.3672	1835.47	1.553	2084.9
		128.467		1.0241	1374.85	1.1887	1595.83	1.3699	1839.09	1.5569	2090.14
		128.533		1.0239	1374.59	1.1862	1592.47	1.3722	1842.18	1.5524	2084.1
		128.6		1.0214	1371.23	1.1861	1592.34	1.3674	1835.73	1.555	2087.59
		128.667		1.0223	1372.44	1.1854	1591.4	1.3657	1833.45	1.5569	2090.14
		128.733		1.0214	1371.23	1.1891	1596.37	1.3699	1839.09	1.5501	2081.01
		128.8		1.0226	1372.84	1.1851	1591	1.3683	1836.94	1.5548	2087.32
		128.867		1.0235	1374.05	1.1877	1594.49	1.3706	1840.03	1.5535	2085.57
		128.933		1.0212	1370.96	1.1885	1595.56	1.3696	1838.69	1.5543	2086.65
		129		1.0232	1373.65	1.1851	1591	1.3683	1836.94	1.5533	2085.31
		129.067		1.0216	1371.5	1.1881	1595.02	1.3668	1834.93	1.5536	2085.71
		129.133		1.022	1372.04	1.1877	1594.49	1.3693	1838.29	1.5555	2088.26
		129.2		1.0209	1370.56	1.1865	1592.88	1.3675	1835.87	1.5546	2087.05
		129.267		1.0221	1372.17	1.1847	1590.46	1.3688	1837.61	1.5525	2084.23
		129.333		1.0213	1371.1	1.1859	1592.07	1.366	1833.86	1.5528	2084.63
		129.4		1.0222	1372.3	1.186	1592.2	1.3711	1840.7	1.5552	2087.86
		129.467		1.0229	1373.24	1.1871	1593.68	1.3675	1835.87	1.5579	2091.48
		129.533		1.0221	1372.17	1.1863	1592.61	1.3674	1835.73	1.5527	2084.5
		129.6		1.0226	1372.84	1.1883	1595.29	1.3682	1836.81	1.5546	2087.05
		129.667		1.0217	1371.63	1.1849	1590.73	1.3672	1835.47	1.5532	2085.17
		129.733		1.0247	1375.66	1.187	1593.55	1.3678	1836.27	1.5515	2082.89
		129.8		1.0238	1374.45	1.1861	1592.34	1.3663	1834.26	1.5558	2088.66
		129.867		1.0244	1375.26	1.1876	1594.35	1.3663	1834.26	1.5522	2083.83
		129.933		1.026	1377.4	1.1888	1595.96	1.3671	1835.33	1.5528	2084.63
		130		1.023	1373.38	1.1862	1592.47	1.3664	1834.39	1.5548	2087.32
		130.067		1.0213	1371.1	1.1865	1592.88	1.3643	1831.57	1.5548	2087.32
		130.133		1.0233	1373.78	1.1836	1588.98	1.367	1835.2	1.5569	2090.14
		130.2		1.0249	1375.93	1.1873	1593.95	1.3672	1835.47	1.5519	2083.43
		130.267		1.0215	1371.36	1.1868	1593.28	1.3698	1838.96	1.5528	2084.63
		130.333		1.0227	1372.97	1.1866	1593.01	1.3679	1836.41	1.557	2090.27
		130.4		1.0231	1373.51	1.1877	1594.49	1.3668	1834.93	1.5519	2083.43
		130.467		1.0223	1372.44	1.1858	1591.94	1.3675	1835.87	1.5524	2084.1
		130.533		1.0233	1373.78	1.1891	1596.37	1.3651	1832.65	1.5529	2084.77
		130.6		1.022	1372.04	1.1926	1601.07	1.3676	1836	1.5554	2088.12
		130.667		1.0211	1370.83	1.1873	1593.95	1.3667	1834.79	1.5563	2089.33
		130.733		1.0197	1368.95	1.1876	1594.35	1.3725	1842.58	1.5535	2085.57
		130.8		1.0221	1372.17	1.1837	1589.12	1.3681	1836.67	1.5518	2083.29
		130.867		1.0208	1370.42	1.1884	1595.43	1.3662	1834.12	1.5539	2086.11
		130.933		1.0215	1371.36	1.188	1594.89	1.3667	1834.79	1.5522	2083.83
		131		1.0261	1377.54	1.1886	1595.7	1.37	1839.23	1.5512	2082.49
		131.067		1.0235	1374.05	1.1909	1598.78	1.3673	1835.6	1.552	2083.56
		131.133		1.0252	1376.33	1.1844	1590.06	1.3686	1837.35	1.5551	2087.72
		131.2		1.0228	1373.11	1.1863	1592.61	1.3672	1835.47	1.5541	2086.38
		131.267		1.0231	1373.51	1.1865	1592.88	1.3668	1834.93	1.5519	2083.43
		131.333		1.0243	1375.12	1.1847	1590.46	1.3683	1836.94	1.5526	2084.37
		131.4		1.0222	1372.3	1.1866	1593.01	1.368	1836.54	1.5543	2086.65
		131.467		1.0226	1372.84	1.1857	1591.8	1.3667	1834.79	1.5505	2081.55
		131.533		1.0216	1371.5	1.1874	1594.08	1.3658	1833.59	1.5531	2085.04
		131.6		1.0231	1373.51	1.1877	1594.49	1.3655	1833.18	1.551	2082.22
		131.667		1.0221	1372.17	1.1879	1594.76	1.3705	1839.9	1.5524	2084.1
		131.733		1.0224	1372.57	1.1885	1595.56	1.3683	1836.94	1.553	2084.9
		131.8		1.0226	1372.84	1.1875	1594.22	1.3666	1834.66	1.5527	2084.5
		131.867		1.0216	1371.5	1.1875	1594.22	1.3661	1833.99	1.5511	2082.35
		131.933		1.0219	1371.9	1.1852	1591.13	1.3693	1838.29	1.5539	2086.11
		132		1.0218	1371.77	1.1863	1592.61	1.3678	1836.27	1.5523	2083.96
		132.067		1.0219	1371.9	1.1863	1592.61	1.3675	1835.87	1.5501	2081.01
		132.133		1.0233	1373.78	1.1894	1596.77	1.364	1831.17	1.5524	2084.1
		132.2		1.0224	1372.57	1.1838	1589.25	1.3692	1838.15	1.5512	2082.49
		132.267		1.0212	1370.96	1.1893	1596.64	1.3669	1835.06	1.5515	2082.89
		132.333		1.0215	1371.36	1.1867	1593.14	1.3657	1833.45	1.5531	2085.04
		132.4		1.0231	1373.51	1.1871	1593.68	1.3651	1832.65	1.5535	2085.57
		132.467		1.0233	1373.78	1.1861	1592.34	1.3693	1838.29	1.5507	2081.81
		132.533		1.0234	1373.91	1.1858	1591.94	1.3649	1832.38	1.5529	2084.77
		132.6		1.0245	1375.39	1.1878	1594.62	1.3659	1833.72	1.5542	2086.51
		132.667		1.0226	1372.84	1.1865	1592.88	1.3648	1832.24	1.5544	2086.78
		132.733		1.0211	1370.83	1.1876	1594.35	1.3683	1836.94	1.5515	2082.89
		132.8		1.023	1373.38	1.1869	1593.41	1.3683	1836.94	1.553	2084.9
[truncated: 708 more rows]

## Sheet: Coupling Enzyme Parameters
	DEAMINATION REACTION
	Co-Substrate for Methyl Transfer (Select ONE)					SAM	8-aza-SAM		pH of EXPERIMENT	8
						YES	NO
	De Parameters for DEAMINATION RECTIONS					De MAX (ACIDIC)	De MAX (BASIC)	pKa
						(M-1 cm-1)	(M-1 cm-1)	deaminated product
	with SAM (recorded at 263 nm)					-8076	-4655	8.72
	with 8-aza-SAM		recorded at (Select ONE)	282 nm	NO	-14975	-2026	7.29			SENSITIVE FOR MOST pHs (<8.00)
				292 nm	NO	-10117	-3016	7.3			SENSITIVE FOR HIGH pHs (>8.00)
	De for SPECIFIC EXPERIMENTAL CONDITIONS is:					-7528.47	(M-1 cm-1)	-7528.47
	INSTRUCTIONS:
	The PINK cells MUST NOT be edited; data in these cells correspond to universal parameters established within the article.
	ONLY GREEN and BLUE cells should be filed: user MUST input a 'YES' or 'NO' answer within GREEN cells.
	Likewise, user MUST input the experimental pH value she/he used within BLUE cell.

## Sheet: My 1-Step EZ-MTase RESULTS
		GNMT Activity Experiments
		LEVEL 1:
		For each volume of Liver Extract, input the value (mAbs/min)
		of the matching Initial Slope from the GRAPHS onto the left.
			GNMT RATES
			Liver Extract	Init slope (10 mm; mAbs/min)	TIME FRAME	Speed (10 mm; Abs/min)	GNMT Rate (mM h-1)
			mL
		1	6	-0.25225	5-60 min	-0.00025225	2.01037	2.01037
		2	12	-0.34693	15-90 min	-0.00034693	2.76494	2.76494
		3	18	-0.50776	15-120 min	-0.00050776	4.04672	4.04672
		4	24	-0.63514	15-120 min	-0.00063514	5.0619	5.0619
							GNMT ACTIVITY
							LEVEL 2:
							AGNMT (mM h-1 mL-1):			0.17394
							AGNMT (pmol min-1 mg-1):			162.257
